# Supplementary material for: Development of a metalloproteomic approach to analyse the response of Arabidopsis cells to uranium stress
Source: Royal Society of Chemistry journal article supplement (doi:10.1039/d0mt00092b), 2020-05-27
Supplement: d0mt00092b1.xlsx [file d0mt00092b1.xlsx]

## Sheet: Read me
	Table S1: Proteins identified by LC MS/MS in Arabidopsis cell soluble fractions separated by Q-Sepharose chromatography
	Spreadsheet 'All proteins'
	6603 proteins
	All proteins identified by MS/MS
	Pep	number of peptides
	SC	spectral counting
	SSC	spectral counting specific to the protein
	WSC	weighted spectral counting : shared SC are distributed according to the protein's number of SSC
	1-F0, 2-F0, and 3-F0 correspond to MS/MS data for fractions F0 from 3 replicates of the Q-Sepharose chromatography
	Spreadsheet 'Filtered only'
	3676 proteins
	Proteins detected with at least 2 peptides and in at least 2 replicates
	Spreadsheets 'Prot F0' to 'Prot F1000'
	Proteins classified by fraction (whole set, 6603 entries)
	For each AGI locus, protein description, name, theorethical MW and pI were obtained from TAIR.
	Elution profiles of all proteins are shown, together with the WSC in each fraction.

## Sheet: All proteins
		1-F0				2-F0				3-F0				1-F50				2-F50				3-F50				1-F100				2-F100				3-F100				1-F150				2-F150				3-F150
Protein		Pep	SC	SSC	WSC	Pep	SC	SSC	WSC	Pep	SC	SSC	WSC	Pep	SC	SSC	WSC	Pep	SC	SSC	WSC	Pep	SC	SSC	WSC	Pep	SC	SSC	WSC	Pep	SC	SSC	WSC	Pep	SC	SSC	WSC	Pep	SC	SSC	WSC	Pep	SC	SSC	WSC	Pep	SC	SSC	WSC
AT1G01050.1	| Symbols: AtPPa1, PPa1 | pyrophosphorylase 1 | chr1:31382-32670 REVERSE LENGTH=212									1	1	1	1					1	1	1	1									1	1	1	1	1	1	0	0.3	14	25	15	17.96	9	19	10	12.67	11	19	14	15.48
AT1G01080.1	| Symbols: | RNA-binding (RRM/RBD/RNP motifs) family protein | chr1:45503-46789 REVERSE LENGTH=293
AT1G01090.1	| Symbols: PDH-E1 ALPHA | pyruvate dehydrogenase E1 alpha | chr1:47705-49166 REVERSE LENGTH=428	6	6	6	6	26	35	35	35	31	46	46	46									11	14	14	14																	1	1	1	1	1	1	1	1
AT1G01100.4	| Symbols: | 60S acidic ribosomal protein family | chr1:50284-50954 REVERSE LENGTH=112	1	1	0	0.5	9	13	7	9.63	8	15	10	12.13									4	4	2	2.82
AT1G01160.2	| Symbols: GIF2 | GRF1-interacting factor 2 | chr1:72583-73883 FORWARD LENGTH=229																	1	1	1	1
AT1G01210.1	| Symbols: | DNA-directed RNA polymerase, subunit M, archaeal | chr1:88977-89529 FORWARD LENGTH=106																																	1	1	1	1	1	1	0	0.5	1	1	0	0.5
AT1G01220.1	| Symbols: FKGP, AtFKGP | L-fucokinase/GDP-L-fucose pyrophosphorylase | chr1:91750-95552 FORWARD LENGTH=1055									1	1	1	1
AT1G01290.2	| Symbols: CNX3 | cofactor of nitrate reductase and xanthine dehydrogenase 3 | chr1:114299-115296 FORWARD LENGTH=270									2	2	2	2	1	2	2	2																					1	1	1	1
AT1G01300.1	| Symbols: | Eukaryotic aspartyl protease family protein | chr1:117065-118522 FORWARD LENGTH=485					5	5	5	5	8	9	9	9									3	3	3	3
AT1G01320.1	| Symbols: | Tetratricopeptide repeat (TPR)-like superfamily protein | chr1:121582-130099 REVERSE LENGTH=1797
AT1G01470.1	| Symbols: LEA14, LSR3 | Late embryogenesis abundant protein | chr1:172295-172826 REVERSE LENGTH=151																																					1	1	1	1					4	4	4	4
AT1G01510.1	| Symbols: AN | NAD(P)-binding Rossmann-fold superfamily protein | chr1:187235-189836 FORWARD LENGTH=636									1	1	1	1
AT1G01630.1	| Symbols: | Sec14p-like phosphatidylinositol transfer family protein | chr1:229206-230675 FORWARD LENGTH=255													3	3	3	3	5	5	5	5	1	1	1	1
AT1G01690.1	| Symbols: ATPRD3, PRD3 | putative recombination initiation defects 3 | chr1:249242-252221 FORWARD LENGTH=449
AT1G01695.1	| Symbols: | Phosphatidylinositol N-acetyglucosaminlytransferase subunit P-related | chr1:252947-254495 FORWARD LENGTH=433
AT1G01710.1	| Symbols: | Acyl-CoA thioesterase family protein | chr1:262950-266029 FORWARD LENGTH=427																									1	1	1	1
AT1G01730.1	| Symbols: | unknown protein; FUNCTIONS IN: molecular_function unknown; INVOLVED IN: biological_process unknown; LOCATED IN: chloroplast; EXPRESSED IN: 23 plant structures; EXPRESSED DURING: 13 growth stages; Has 42 Blast hits to 42 proteins in 17																									1	1	1	1
AT1G01770.1	| Symbols: | unknown protein; CONTAINS InterPro DOMAIN/s: Protein of unknown function DUF1446 (InterPro:IPR010839); Has 1597 Blast hits to 1509 proteins in 306 species: Archae - 4; Bacteria - 843; Metazoa - 22; Fungi - 131; Plants - 31; Viruses - 0
AT1G01800.1	| Symbols: | NAD(P)-binding Rossmann-fold superfamily protein | chr1:293396-294888 FORWARD LENGTH=295					1	1	1	1	1	1	1	1									1	1	1	1					1	2	2	2	6	6	5	5.4	19	24	23	23.4	21	27	26	26.4	16	25	24	24.4
AT1G01820.1	| Symbols: PEX11C | peroxin 11c | chr1:296213-297723 REVERSE LENGTH=235					1	1	1	1
AT1G01860.1	| Symbols: PFC1 | Ribosomal RNA adenine dimethylase family protein | chr1:304439-306275 REVERSE LENGTH=343
AT1G01910.1	| Symbols: | P-loop containing nucleoside triphosphate hydrolases superfamily protein | chr1:313595-315831 REVERSE LENGTH=353									1	1	1	1
AT1G01920.1	| Symbols: | SET domain-containing protein | chr1:316204-319507 FORWARD LENGTH=572
AT1G01940.1	| Symbols: | Cyclophilin-like peptidyl-prolyl cis-trans isomerase family protein | chr1:323082-324719 FORWARD LENGTH=160	14	22	22	22	5	6	6	6	3	3	3	3	4	4	4	4	5	5	5	5	8	9	9	9	3	3	3	3	3	3	3	3	6	6	6	6	4	4	4	4	3	3	3	3	1	1	1	1
AT1G01960.1	| Symbols: EDA10 | SEC7-like guanine nucleotide exchange family protein | chr1:330830-337582 REVERSE LENGTH=1750	1	1	1	1	1	1	1	1	7	8	5	7.18	1	1	1	1	1	1	1	1	4	4	2	3.45
AT1G02080.2	| Symbols: | transcription regulators | chr1:373694-386682 FORWARD LENGTH=2377					3	4	4	4	10	11	11	11	3	3	3	3	2	2	2	2	2	2	2	2	1	1	1	1					3	3	3	3									1	1	1	1
AT1G02090.2	| Symbols: FUS5, CSN7, COP15, ATCSN7 | Proteasome component (PCI) domain protein | chr1:387647-389568 REVERSE LENGTH=225
AT1G02100.1	| Symbols: | Leucine carboxyl methyltransferase | chr1:389876-392448 FORWARD LENGTH=332																																	3	3	3	3	2	2	2	2	3	3	3	3	2	2	2	2
AT1G02130.1	| Symbols: ATRAB1B, ARA5, ARA-5, ATRABD2A, RABD2A, RA-5 | RAS 5 | chr1:400350-401788 REVERSE LENGTH=203	1	1	0	0.27	4	5	1	2.38	5	5	2	3.11	1	1	0	0.33	1	1	0	0.33	1	1	0	0.33	1	1	0	0.33					1	1	0	0.33					1	1	0	0.33	2	3	0	0.88
AT1G02140.1	| Symbols: MEE63, MAGO, HAP1 | mago nashi family protein | chr1:403467-404401 REVERSE LENGTH=150					2	2	2	2	2	2	2	2
AT1G02150.1	| Symbols: | Tetratricopeptide repeat (TPR)-like superfamily protein | chr1:408779-410433 FORWARD LENGTH=524
AT1G02170.1	| Symbols: LOL3, ATMCPB1, MCP1B, ATMC1, MC1 | metacaspase 1 | chr1:411883-413426 FORWARD LENGTH=367																																													1	1	1	1
AT1G02190.2	| Symbols: | Fatty acid hydroxylase superfamily | chr1:415154-417796 FORWARD LENGTH=623
AT1G02220.1	| Symbols: ANAC003, NAC003 | NAC domain containing protein 3 | chr1:428902-430567 REVERSE LENGTH=394									1	1	1	1
AT1G02280.1	| Symbols: TOC33, ATTOC33, PPI1 | translocon at the outer envelope membrane of chloroplasts 33 | chr1:448665-450246 REVERSE LENGTH=297					1	1	1	1
AT1G02305.1	| Symbols: | Cysteine proteinases superfamily protein | chr1:455816-457974 FORWARD LENGTH=362					1	1	1	1													2	2	2	2	10	21	21	21	6	9	9	9	3	3	3	3	9	11	11	11	3	5	5	5	1	1	1	1
AT1G02330.1	| Symbols: | CONTAINS InterPro DOMAIN/s: Hepatocellular carcinoma-associated antigen 59 (InterPro:IPR010756); Has 1239 Blast hits to 998 proteins in 204 species: Archae - 4; Bacteria - 71; Metazoa - 421; Fungi - 109; Plants - 87; Viruses - 5; Other
AT1G02360.1	| Symbols: | Chitinase family protein | chr1:472138-473116 REVERSE LENGTH=272													4	6	6	6	5	6	6	6	5	5	5	5
AT1G02370.1	| Symbols: | Tetratricopeptide repeat (TPR)-like superfamily protein | chr1:474516-476383 FORWARD LENGTH=537
AT1G02410.1	| Symbols: | cytochrome c oxidase assembly protein CtaG / Cox11 family | chr1:491300-492762 FORWARD LENGTH=287					1	2	2	2
AT1G02420.1	| Symbols: | Pentatricopeptide repeat (PPR) superfamily protein | chr1:493683-495158 FORWARD LENGTH=491																																	1	1	1	1
AT1G02475.1	| Symbols: | Polyketide cyclase/dehydrase and lipid transport superfamily protein | chr1:514110-515331 REVERSE LENGTH=219													5	7	7	7	1	1	1	1
AT1G02500.1	| Symbols: SAM1, SAM-1, MAT1, AtSAM1 | S-adenosylmethionine synthetase 1 | chr1:519037-520218 FORWARD LENGTH=393					5	5	2	3.01	9	10	2	4.49									2	2	0	0.65	1	2	0	0.97	1	1	0	0.17					1	1	0	0.24	1	1	0	0.17	1	1	0	0.17
AT1G02520.1	| Symbols: PGP11 | P-glycoprotein 11 | chr1:524134-528745 FORWARD LENGTH=1278					1	1	1	1
AT1G02560.1	| Symbols: CLPP5, NCLPP5, NCLPP1 | nuclear encoded CLP protease 5 | chr1:538000-539805 FORWARD LENGTH=298									1	1	1	1
AT1G02640.1	| Symbols: BXL2, ATBXL2 | beta-xylosidase 2 | chr1:564293-567580 FORWARD LENGTH=768																																					1	1	1	1
AT1G02690.2	| Symbols: IMPA-6 | importin alpha isoform 6 | chr1:584397-587036 FORWARD LENGTH=539									4	4	3	3.17
AT1G02770.1	| Symbols: | Protein of unknown function (DUF626) | chr1:605071-606624 REVERSE LENGTH=316
AT1G02780.1	| Symbols: emb2386 | Ribosomal protein L19e family protein | chr1:608120-609391 REVERSE LENGTH=214					5	9	7	8	9	15	12	13.5									3	5	5	5
AT1G02816.1	| Symbols: | Protein of unknown function, DUF538 | chr1:621637-622137 FORWARD LENGTH=166					1	1	1	1
AT1G02840.3	| Symbols: SR1, ATSRP34, SRP34, SR34, At-SR34 | RNA-binding (RRM/RBD/RNP motifs) family protein | chr1:626918-629583 FORWARD LENGTH=303	1	1	1	1	2	2	0	1.37	4	6	6	6									1	1	1	1
AT1G02870.1	| Symbols: | FUNCTIONS IN: molecular_function unknown; INVOLVED IN: biological_process unknown; EXPRESSED IN: 23 plant structures; EXPRESSED DURING: 13 growth stages; CONTAINS InterPro DOMAIN/s: Ribosome biogenesis protein Nop16 (InterPro:IPR019002																																									1	1	1	1
AT1G02880.3	| Symbols: TPK1 | thiamin pyrophosphokinase1 | chr1:643063-644485 REVERSE LENGTH=267
AT1G02890.2	| Symbols: | AAA-type ATPase family protein | chr1:645372-651797 REVERSE LENGTH=1218					2	2	0	0.64
AT1G02920.1	| Symbols: ATGSTF7, GST11, ATGSTF8, GSTF7, ATGST11 | glutathione S-transferase 7 | chr1:658886-659705 REVERSE LENGTH=209													2	2	0	0.8					6	6	5	5.54	5	6	3	4.62	4	5	3	4.08	9	10	6	8.15	4	5	0	2.69	3	3	0	1.62	4	6	0	3.23
AT1G02930.1	| Symbols: ATGSTF6, GST1, ERD11, ATGSTF3, GSTF6, ATGST1 | glutathione S-transferase 6 | chr1:661363-662191 REVERSE LENGTH=208													2	2	0	0.68					1	1	0	0.46	3	3	0	1.38	2	2	0	0.92	4	4	0	1.85	5	6	1	3.31	5	5	2	3.38	9	12	6	8.77
AT1G02990.2	| Symbols: | BEST Arabidopsis thaliana protein match is: CW-type Zinc Finger (TAIR:AT3G62900.1); Has 35333 Blast hits to 34131 proteins in 2444 species: Archae - 798; Bacteria - 22429; Metazoa - 974; Fungi - 991; Plants - 531; Viruses - 0; Other Eu
AT1G03030.1	| Symbols: | P-loop containing nucleoside triphosphate hydrolases superfamily protein | chr1:701621-703568 FORWARD LENGTH=301
AT1G03060.1	| Symbols: SPI | Beige/BEACH domain ;WD domain, G-beta repeat protein | chr1:712971-726891 REVERSE LENGTH=3601
AT1G03090.2	| Symbols: MCCA | methylcrotonyl-CoA carboxylase alpha chain, mitochondrial / 3-methylcrotonyl-CoA carboxylase 1 (MCCA) | chr1:739715-743819 FORWARD LENGTH=734
AT1G03110.1	| Symbols: TRM82, AtTRM82 | Transducin/WD40 repeat-like superfamily protein | chr1:749359-751796 FORWARD LENGTH=427
AT1G03150.1	| Symbols: | Acyl-CoA N-acyltransferases (NAT) superfamily protein | chr1:756461-758441 FORWARD LENGTH=174
AT1G03210.1	| Symbols: | Phenazine biosynthesis PhzC/PhzF protein | chr1:782948-784240 FORWARD LENGTH=286
AT1G03220.1	| Symbols: | Eukaryotic aspartyl protease family protein | chr1:787143-788444 FORWARD LENGTH=433	8	10	8	9.26	5	6	4	5.26	9	11	9	10.26	24	56	47	52.66	20	41	32	37.66	19	51	42	47.66	15	20	16	18.51	9	12	7	10.14	11	18	15	16.89	6	7	3	5.51	4	4	2	3.26	3	5	2	3.89
AT1G03230.1	| Symbols: | Eukaryotic aspartyl protease family protein | chr1:790110-791414 FORWARD LENGTH=434	2	2	0	0.74	4	6	4	4.74	7	8	6	6.74	13	19	10	13.34	13	19	10	13.34	5	10	1	4.34	9	10	6	7.49	8	9	4	5.86	3	4	1	2.11	12	13	9	10.49	9	10	8	8.74	4	5	2	3.11
AT1G03250.1	| Symbols: | unknown protein; Has 89 Blast hits to 89 proteins in 31 species: Archae - 0; Bacteria - 0; Metazoa - 31; Fungi - 0; Plants - 48; Viruses - 0; Other Eukaryotes - 10 (source: NCBI BLink). | chr1:793576-795159 REVERSE LENGTH=245									2	2	2	2																									1	1	1	1	1	1	1	1
AT1G03280.1	| Symbols: | Transcription factor TFIIE, alpha subunit | chr1:803635-806758 FORWARD LENGTH=479
AT1G03310.2	| Symbols: ATISA2, ISA2, DBE1, BE2 | debranching enzyme 1 | chr1:813975-816623 FORWARD LENGTH=882
AT1G03330.1	| Symbols: | Small nuclear ribonucleoprotein family protein | chr1:818161-819297 REVERSE LENGTH=93					1	1	1	1	1	1	1	1
AT1G03350.1	| Symbols: | BSD domain-containing protein | chr1:822834-824246 REVERSE LENGTH=470
AT1G03360.1	| Symbols: ATRRP4, RRP4 | ribosomal RNA processing 4 | chr1:824653-826179 FORWARD LENGTH=322
AT1G03370.1	| Symbols: | C2 calcium/lipid-binding and GRAM domain containing protein | chr1:830968-834996 FORWARD LENGTH=1020
AT1G03400.1	| Symbols: | 2-oxoglutarate (2OG) and Fe(II)-dependent oxygenase superfamily protein | chr1:842895-844158 REVERSE LENGTH=351																																													2	2	2	2
AT1G03410.1	| Symbols: 2A6 | 2-oxoglutarate (2OG) and Fe(II)-dependent oxygenase superfamily protein | chr1:844782-846574 REVERSE LENGTH=398																					1	1	1	1
AT1G03430.1	| Symbols: AHP5 | histidine-containing phosphotransfer factor 5 | chr1:848159-849235 FORWARD LENGTH=157																																	1	1	1	1
AT1G03475.1	| Symbols: LIN2, HEMF1, ATCPO-I | Coproporphyrinogen III oxidase | chr1:869302-871175 REVERSE LENGTH=386
AT1G03530.1	| Symbols: ATNAF1, NAF1 | nuclear assembly factor 1 | chr1:880638-883338 REVERSE LENGTH=801
AT1G03600.1	| Symbols: PSB27 | photosystem II family protein | chr1:898916-899440 FORWARD LENGTH=174	4	4	4	4									5	5	5	5	3	3	3	3	2	2	2	2
AT1G03630.1	| Symbols: POR C, PORC | protochlorophyllide oxidoreductase C | chr1:907699-909245 FORWARD LENGTH=401													1	1	1	1	1	1	1	1	1	1	1	1									1	1	1	1
AT1G03650.1	| Symbols: | Acyl-CoA N-acyltransferases (NAT) superfamily protein | chr1:910249-911103 REVERSE LENGTH=158
AT1G03680.1	| Symbols: ATHM1, TRX-M1, ATM1, THM1 | thioredoxin M-type 1 | chr1:916990-917865 REVERSE LENGTH=179																					1	1	1	1	5	6	6	6	3	4	4	4	5	9	9	9	7	12	12	12	5	6	6	6	5	5	5	5
AT1G03750.1	| Symbols: CHR9 | switch 2 | chr1:937920-941068 FORWARD LENGTH=862																																	1	1	1	1					1	1	1	1
AT1G03760.1	| Symbols: | Prefoldin chaperone subunit family protein | chr1:941211-943320 REVERSE LENGTH=391	1	1	1	1
AT1G03810.1	| Symbols: | Nucleic acid-binding, OB-fold-like protein | chr1:958759-959609 FORWARD LENGTH=143																									1	2	2	2
AT1G03830.1	| Symbols: | guanylate-binding family protein | chr1:962128-966622 REVERSE LENGTH=991
AT1G03860.1	| Symbols: ATPHB2, PHB2 | prohibitin 2 | chr1:979611-981157 REVERSE LENGTH=286					8	12	8	10.35	9	11	7	9.35									2	2	1	1.54									2	2	1	1.54
AT1G03870.1	| Symbols: FLA9 | FASCICLIN-like arabinoogalactan 9 | chr1:982625-983368 REVERSE LENGTH=247													8	8	8	8	3	4	4	4	6	8	8	8	3	3	3	3	1	1	1	1	1	1	1	1
AT1G03900.1	| Symbols: ATNAP4, NAP4 | non-intrinsic ABC protein 4 | chr1:991252-992852 FORWARD LENGTH=272
AT1G03905.1	| Symbols: | P-loop containing nucleoside triphosphate hydrolases superfamily protein | chr1:993478-995594 FORWARD LENGTH=290
AT1G03910.2	| Symbols: | EXPRESSED IN: 24 plant structures; EXPRESSED DURING: 13 growth stages; CONTAINS InterPro DOMAIN/s: Cactin protein, cactus-binding domain, C-terminal (InterPro:IPR019134), Cactin, central region (InterPro:IPR018816); BEST Arabidopsis th
AT1G03960.2	| Symbols: | Calcium-binding EF hand family protein | chr1:1014824-1017472 FORWARD LENGTH=389
AT1G03980.1	| Symbols: ATPCS2, PCS2 | phytochelatin synthase 2 | chr1:1019311-1021871 REVERSE LENGTH=452
AT1G04080.3	| Symbols: PRP39 | Tetratricopeptide repeat (TPR)-like superfamily protein | chr1:1051803-1056550 FORWARD LENGTH=823
AT1G04130.1	| Symbols: TPR2, AtTPR2 | Tetratricopeptide repeat (TPR)-like superfamily protein | chr1:1073465-1075374 FORWARD LENGTH=360																									1	1	1	1					1	1	1	1	9	11	11	11	8	10	10	10	8	9	9	9
AT1G04140.2	| Symbols: | Transducin family protein / WD-40 repeat family protein | chr1:1075992-1080321 REVERSE LENGTH=793
AT1G04150.1	| Symbols: | C2 calcium/lipid-binding plant phosphoribosyltransferase family protein | chr1:1081208-1084246 REVERSE LENGTH=1012
AT1G04170.1	| Symbols: EIF2 GAMMA | eukaryotic translation initiation factor 2 gamma subunit | chr1:1097423-1099702 FORWARD LENGTH=465									8	11	11	11					2	2	2	2																					1	1	1	1	1	1	1	1
AT1G04190.1	| Symbols: TPR3 | Tetratricopeptide repeat (TPR)-like superfamily protein | chr1:1106617-1108557 REVERSE LENGTH=328					1	1	1	1	1	1	1	1	10	12	12	12	3	3	3	3					7	7	7	7	6	7	7	7	4	4	4	4	11	13	13	13	11	14	14	14	8	8	8	8
AT1G04200.1	| Symbols: | FUNCTIONS IN: molecular_function unknown; INVOLVED IN: N-terminal protein myristoylation; LOCATED IN: cellular_component unknown; EXPRESSED IN: 22 plant structures; EXPRESSED DURING: 13 growth stages; CONTAINS InterPro DOMAIN/s: Dymecl
AT1G04260.1	| Symbols: MPI7, MPIP7, PRA1.D | CAMV movement protein interacting protein 7 | chr1:1140749-1141297 REVERSE LENGTH=182					3	3	3	3	4	4	4	4
AT1G04270.1	| Symbols: RPS15 | cytosolic ribosomal protein S15 | chr1:1141852-1142960 REVERSE LENGTH=152					7	32	32	32	8	35	35	35									3	5	5	5
AT1G04300.2	| Symbols: | TRAF-like superfamily protein | chr1:1148818-1153095 REVERSE LENGTH=997					1	1	1	1	1	1	1	1
AT1G04340.1	| Symbols: | HR-like lesion-inducing protein-related | chr1:1163345-1164737 REVERSE LENGTH=159					1	1	1	1	1	2	2	2
AT1G04350.1	| Symbols: | 2-oxoglutarate (2OG) and Fe(II)-dependent oxygenase superfamily protein | chr1:1165296-1166538 FORWARD LENGTH=360																																					3	3	3	3	2	2	2	2	4	5	5	5
AT1G04400.1	| Symbols: CRY2, FHA, AT-PHH1, PHH1, ATCRY2 | cryptochrome 2 | chr1:1185719-1187901 REVERSE LENGTH=612																																													2	3	3	3
AT1G04410.1	| Symbols: | Lactate/malate dehydrogenase family protein | chr1:1189418-1191267 REVERSE LENGTH=332	5	5	4	4.56	4	4	2	3.11	11	14	8	11.33	10	12	7	9.78	9	10	5	7.78	10	14	4	9.56	26	54	29	42.89	19	40	20	31.11	41	327	235	286.11	35	198	153	178	34	225	179	204.56	29	124	92	109.78
AT1G04420.1	| Symbols: | NAD(P)-linked oxidoreductase superfamily protein | chr1:1191634-1193699 FORWARD LENGTH=412
AT1G04430.1	| Symbols: | S-adenosyl-L-methionine-dependent methyltransferases superfamily protein | chr1:1198860-1201301 FORWARD LENGTH=623					1	1	1	1	3	4	4	4
AT1G04510.1	| Symbols: MAC3A | MOS4-associated complex 3A | chr1:1226749-1230592 FORWARD LENGTH=523					2	2	2	2	5	5	5	5									3	3	3	3
AT1G04530.1	| Symbols: TPR4 | Tetratricopeptide repeat (TPR)-like superfamily protein | chr1:1234456-1235895 REVERSE LENGTH=310
AT1G04580.1	| Symbols: AAO4, ATAO-4, ATAO2, AO4 | aldehyde oxidase 4 | chr1:1252212-1257510 REVERSE LENGTH=1337
AT1G04590.1	| Symbols: | BEST Arabidopsis thaliana protein match is: Pentatricopeptide repeat (PPR) superfamily protein (TAIR:AT4G21190.1); Has 111 Blast hits to 111 proteins in 15 species: Archae - 0; Bacteria - 0; Metazoa - 0; Fungi - 0; Plants - 109; Viruse
AT1G04600.1	| Symbols: XIA, ATXIA | myosin XI A | chr1:1262123-1272376 FORWARD LENGTH=1730
AT1G04620.1	| Symbols: | coenzyme F420 hydrogenase family / dehydrogenase, beta subunit family | chr1:1282869-1286492 REVERSE LENGTH=462																	1	1	1	1
AT1G04640.1	| Symbols: LIP2 | lipoyltransferase 2 | chr1:1292541-1293248 FORWARD LENGTH=235																																													2	2	2	2
AT1G04690.1	| Symbols: KAB1, KV-BETA1 | potassium channel beta subunit 1 | chr1:1313662-1315420 FORWARD LENGTH=328	2	2	2	2	3	4	4	4	11	15	15	15	22	31	31	31	12	20	20	20	14	22	22	22	12	19	19	19	9	11	11	11	16	23	23	23	13	16	16	16	10	15	15	15	14	20	20	20
AT1G04750.1	| Symbols: VAMP7B, VAMP721, ATVAMP721, AT VAMP7B | vesicle-associated membrane protein 721 | chr1:1331857-1333426 REVERSE LENGTH=219	3	3	0	1.5	5	7	0	3.5	7	10	0	5	5	5	0	2.5	3	4	0	2	9	11	1	6	1	1	0	0.5	1	1	0	0.5	2	2	0	1	1	1	0	0.5	1	1	0	0.5	1	1	0	0.5
AT1G04810.1	| Symbols: | 26S proteasome regulatory complex, non-ATPase subcomplex, Rpn2/Psmd1 subunit | chr1:1350304-1355261 FORWARD LENGTH=1001					4	4	0	1.58	14	16	5	9.35									7	8	2	4.37
AT1G04830.2	| Symbols: | Ypt/Rab-GAP domain of gyp1p superfamily protein | chr1:1358782-1361844 REVERSE LENGTH=459													1	1	1	1
AT1G04850.1	| Symbols: | ubiquitin-associated (UBA)/TS-N domain-containing protein | chr1:1365311-1368706 REVERSE LENGTH=413	2	2	2	2	3	3	3	3	1	1	1	1
AT1G04870.2	| Symbols: PRMT10, ATPRMT10 | protein arginine methyltransferase 10 | chr1:1373485-1375598 REVERSE LENGTH=383
AT1G04950.2	| Symbols: TAFII59, TAF6, ATTAF6 | TATA BOX ASSOCIATED FACTOR II 59 | chr1:1403606-1407184 REVERSE LENGTH=549
AT1G04990.1	| Symbols: | Zinc finger C-x8-C-x5-C-x3-H type family protein | chr1:1419368-1421454 REVERSE LENGTH=404
AT1G05010.1	| Symbols: EFE, ACO4, EAT1 | ethylene-forming enzyme | chr1:1431419-1432695 REVERSE LENGTH=323																																													1	1	1	1
AT1G05180.1	| Symbols: AXR1 | NAD(P)-binding Rossmann-fold superfamily protein | chr1:1498357-1501775 REVERSE LENGTH=540
AT1G05190.1	| Symbols: emb2394 | Ribosomal protein L6 family | chr1:1502515-1503738 REVERSE LENGTH=223					1	1	1	1	4	5	5	5									1	1	1	1													3	3	3	3	1	1	1	1
AT1G05320.3	| Symbols: | FUNCTIONS IN: molecular_function unknown; INVOLVED IN: biological_process unknown; LOCATED IN: cellular_component unknown; EXPRESSED IN: fruit, egg cell; CONTAINS InterPro DOMAIN/s: Prefoldin (InterPro:IPR009053); BEST Arabidopsis thal																																									1	1	1	1
AT1G05350.1	| Symbols: | NAD(P)-binding Rossmann-fold superfamily protein | chr1:1560891-1564005 REVERSE LENGTH=431
AT1G05460.1	| Symbols: SDE3 | P-loop containing nucleoside triphosphate hydrolases superfamily protein | chr1:1601357-1604658 REVERSE LENGTH=1002
AT1G05520.1	| Symbols: | Sec23/Sec24 protein transport family protein | chr1:1631126-1635703 REVERSE LENGTH=783
AT1G05560.1	| Symbols: UGT1, UGT75B1 | UDP-glucosyltransferase 75B1 | chr1:1645674-1647083 REVERSE LENGTH=469
AT1G05620.1	| Symbols: URH2 | uridine-ribohydrolase 2 | chr1:1679286-1681527 FORWARD LENGTH=322
AT1G05680.1	| Symbols: UGT74E2 | Uridine diphosphate glycosyltransferase 74E2 | chr1:1703196-1704639 REVERSE LENGTH=453
AT1G05730.1	| Symbols: | Eukaryotic protein of unknown function (DUF842) | chr1:1719107-1720159 FORWARD LENGTH=149																																	2	4	4	4	1	1	0	0.12
AT1G05790.1	| Symbols: | lipase class 3 family protein | chr1:1733039-1737365 FORWARD LENGTH=687
AT1G05890.2	| Symbols: ARI5 | RING/U-box superfamily protein | chr1:1779631-1784166 FORWARD LENGTH=594
AT1G06000.1	| Symbols: | UDP-Glycosyltransferase superfamily protein | chr1:1820495-1821802 REVERSE LENGTH=435
AT1G06060.1	| Symbols: | LisH and RanBPM domains containing protein | chr1:1833071-1834516 FORWARD LENGTH=213
AT1G06110.1	| Symbols: SKIP16 | SKP1/ASK-interacting protein 16 | chr1:1853237-1854938 REVERSE LENGTH=436
AT1G06130.2	| Symbols: GLX2-4 | glyoxalase 2-4 | chr1:1858034-1860640 REVERSE LENGTH=330																																					6	7	7	7	5	5	5	5	6	8	8	8
AT1G06190.2	| Symbols: | Rho termination factor | chr1:1892589-1894078 REVERSE LENGTH=292																	1	1	1	1									1	1	1	1									1	1	1	1
AT1G06210.1	| Symbols: | ENTH/VHS/GAT family protein | chr1:1897567-1898986 FORWARD LENGTH=383
AT1G06220.2	| Symbols: MEE5 | Ribosomal protein S5/Elongation factor G/III/V family protein | chr1:1900524-1904583 FORWARD LENGTH=987					17	17	17	17	27	31	31	31									7	7	7	7													1	1	1	1
AT1G06230.3	| Symbols: GTE4 | global transcription factor group E4 | chr1:1907626-1910183 FORWARD LENGTH=766
AT1G06290.1	| Symbols: ACX3, ATACX3 | acyl-CoA oxidase 3 | chr1:1922423-1926002 FORWARD LENGTH=675									1	1	1	1	9	11	11	11	10	11	11	11	15	18	18	18	26	31	31	31	26	33	33	33	31	43	43	43	14	16	16	16	15	19	19	19	9	11	11	11
AT1G06390.1	| Symbols: GSK1, ATGSK1, ATSK22, SK22, BIL2, ATSK2-3 | GSK3/SHAGGY-like protein kinase 1 | chr1:1946860-1950417 FORWARD LENGTH=407													1	1	1	1
AT1G06400.1	| Symbols: ARA2, ATRABA1A, ATRAB11E, ARA-2 | Ras-related small GTP-binding family protein | chr1:1951089-1952686 REVERSE LENGTH=216					4	4	3	3.27	4	4	3	3.17	1	1	0	0.17	2	2	1	1.17	2	2	2	2	1	1	0	0.17	3	4	3	3.17	3	3	2	2.17	1	1	0	0.17
AT1G06410.1	| Symbols: ATTPS7, TPS7, ATTPSA | trehalose-phosphatase/synthase 7 | chr1:1955413-1958153 FORWARD LENGTH=851					1	1	1	1	7	7	7	7
AT1G06430.1	| Symbols: FTSH8 | FTSH protease 8 | chr1:1960214-1962525 REVERSE LENGTH=685					2	2	0	0.4
AT1G06510.1	| Symbols: | unknown protein; FUNCTIONS IN: molecular_function unknown; INVOLVED IN: biological_process unknown; LOCATED IN: chloroplast; EXPRESSED IN: 21 plant structures; EXPRESSED DURING: 13 growth stages; Has 376 Blast hits to 369 proteins in 1
AT1G06530.1	| Symbols: | Tropomyosin-related | chr1:2001625-2002596 FORWARD LENGTH=323					1	1	1	1													1	1	1	1
AT1G06550.1	| Symbols: | ATP-dependent caseinolytic (Clp) protease/crotonase family protein | chr1:2003834-2006564 REVERSE LENGTH=387
AT1G06560.1	| Symbols: | NOL1/NOP2/sun family protein | chr1:2007660-2011824 FORWARD LENGTH=599
AT1G06570.1	| Symbols: PDS1, HPD | phytoene desaturation 1 | chr1:2012015-2013543 REVERSE LENGTH=473
AT1G06650.2	| Symbols: | 2-oxoglutarate (2OG) and Fe(II)-dependent oxygenase superfamily protein | chr1:2035909-2037186 FORWARD LENGTH=369																									2	2	2	2	1	1	1	1	9	12	12	12	12	16	16	16	6	8	8	8	5	5	5	5
AT1G06660.1	| Symbols: | unknown protein; BEST Arabidopsis thaliana protein match is: unknown protein (TAIR:AT2G30820.2); Has 166 Blast hits to 144 proteins in 35 species: Archae - 0; Bacteria - 17; Metazoa - 13; Fungi - 20; Plants - 104; Viruses - 0; Other Eu
AT1G06670.1	| Symbols: NIH | nuclear DEIH-boxhelicase | chr1:2040567-2047333 FORWARD LENGTH=1576									3	3	3	3
AT1G06680.2	| Symbols: PSBP-1, OEE2, PSII-P | photosystem II subunit P-1 | chr1:2048076-2049186 FORWARD LENGTH=219									1	1	1	1													4	6	3	5.75	5	7	6	6.92	10	37	34	36.75	12	31	25	30.5	10	24	21	23.75	9	21	15	20.5
AT1G06690.1	| Symbols: | NAD(P)-linked oxidoreductase superfamily protein | chr1:2049742-2052039 REVERSE LENGTH=377																																					1	1	1	1	4	4	4	4	4	4	4	4
AT1G06700.2	| Symbols: | Protein kinase superfamily protein | chr1:2052750-2054552 REVERSE LENGTH=361																									1	1	0	0.43	1	1	1	1	2	2	2	2	2	2	2	2	2	3	3	3	1	1	1	1
AT1G06720.1	| Symbols: | P-loop containing nucleoside triphosphate hydrolases superfamily protein | chr1:2060615-2067281 REVERSE LENGTH=1147
AT1G06730.1	| Symbols: | pfkB-like carbohydrate kinase family protein | chr1:2067633-2070049 FORWARD LENGTH=488
AT1G06760.1	| Symbols: | winged-helix DNA-binding transcription factor family protein | chr1:2076687-2077616 REVERSE LENGTH=274									1	1	1	1
AT1G06790.1	| Symbols: | RNA polymerase Rpb7 N-terminal domain-containing protein | chr1:2087645-2089287 FORWARD LENGTH=204
AT1G06840.1	| Symbols: | Leucine-rich repeat protein kinase family protein | chr1:2097854-2103208 REVERSE LENGTH=953	2	2	2	2	3	3	3	3					3	3	3	3	1	1	1	1	1	1	1	1
AT1G06890.2	| Symbols: | nodulin MtN21 /EamA-like transporter family protein | chr1:2111728-2114038 REVERSE LENGTH=357									1	1	1	1
AT1G06900.1	| Symbols: | Insulinase (Peptidase family M16) family protein | chr1:2115155-2120635 REVERSE LENGTH=1024
AT1G06950.1	| Symbols: ATTIC110, TIC110 | translocon at the inner envelope membrane of chloroplasts 110 | chr1:2130303-2135563 REVERSE LENGTH=1016					8	8	8	8	8	8	8	8
AT1G06960.2	| Symbols: | RNA-binding (RRM/RBD/RNP motifs) family protein | chr1:2135930-2137533 FORWARD LENGTH=228																	1	1	1	1									1	1	1	1									1	1	1	1
AT1G07040.1	| Symbols: | unknown protein; INVOLVED IN: biological_process unknown; LOCATED IN: chloroplast; EXPRESSED IN: 24 plant structures; EXPRESSED DURING: 14 growth stages; BEST Arabidopsis thaliana protein match is: unknown protein (TAIR:AT1G27030.1); H	1	1	1	1	6	6	6	6					13	21	21	21	8	11	11	11	11	15	15	15	10	13	13	13	7	9	9	9	6	7	7	7					1	1	1	1
AT1G07060.1	| Symbols: | unknown protein; Has 30 Blast hits to 30 proteins in 10 species: Archae - 0; Bacteria - 0; Metazoa - 0; Fungi - 0; Plants - 30; Viruses - 0; Other Eukaryotes - 0 (source: NCBI BLink). | chr1:2167138-2168397 REVERSE LENGTH=233
AT1G07070.1	| Symbols: | Ribosomal protein L35Ae family protein | chr1:2168652-2169703 FORWARD LENGTH=112					4	5	1	1.8	4	9	1	2.6									1	1	0	0.2
AT1G07080.1	| Symbols: | Thioredoxin superfamily protein | chr1:2170069-2171861 FORWARD LENGTH=265																																									1	1	1	1	1	1	1	1
AT1G07090.1	| Symbols: LSH6 | Protein of unknown function (DUF640) | chr1:2174202-2174792 REVERSE LENGTH=196
AT1G07110.1	| Symbols: F2KP, ATF2KP, FKFBP | fructose-2,6-bisphosphatase | chr1:2178363-2183980 REVERSE LENGTH=744									3	3	3	3
AT1G07140.1	| Symbols: SIRANBP | Pleckstrin homology (PH) domain superfamily protein | chr1:2192360-2193688 REVERSE LENGTH=228
AT1G07170.3	| Symbols: | PHF5-like protein | chr1:2200686-2201018 FORWARD LENGTH=110	1	1	1	1									2	2	2	2									1	1	1	1					1	1	1	1	1	1	1	1
AT1G07180.1	| Symbols: ATNDI1, NDA1 | alternative NAD(P)H dehydrogenase 1 | chr1:2204414-2206773 FORWARD LENGTH=510																																													1	1	1	1
AT1G07210.1	| Symbols: | Ribosomal protein S18 | chr1:2215320-2216668 FORWARD LENGTH=261					1	1	1	1	1	1	1	1
AT1G07240.1	| Symbols: UGT71C5 | UDP-glucosyl transferase 71C5 | chr1:2223889-2225331 FORWARD LENGTH=480
AT1G07250.1	| Symbols: UGT71C4 | UDP-glucosyl transferase 71C4 | chr1:2225963-2227402 FORWARD LENGTH=479
AT1G07280.2	| Symbols: | Tetratricopeptide repeat (TPR)-like superfamily protein | chr1:2238505-2240991 FORWARD LENGTH=552									1	1	1	1
AT1G07320.3	| Symbols: RPL4 | ribosomal protein L4 | chr1:2249190-2250026 FORWARD LENGTH=278					3	3	3	3	5	5	5	5
AT1G07360.1	| Symbols: | CCCH-type zinc fingerfamily protein with RNA-binding domain | chr1:2260562-2262795 REVERSE LENGTH=481					1	2	2	2	5	5	2	4													1	1	1	1	3	3	2	2.67	1	1	1	1	1	1	1	1	3	3	2	2.67
AT1G07370.1	| Symbols: PCNA1, ATPCNA1 | proliferating cellular nuclear antigen 1 | chr1:2263204-2264382 FORWARD LENGTH=263									6	6	1	4.04
AT1G07450.1	| Symbols: | NAD(P)-binding Rossmann-fold superfamily protein | chr1:2288038-2289256 REVERSE LENGTH=260																					1	1	1	1
AT1G07460.1	| Symbols: | Concanavalin A-like lectin family protein | chr1:2290201-2290977 FORWARD LENGTH=258
AT1G07470.1	| Symbols: | Transcription factor IIA, alpha/beta subunit | chr1:2291723-2294350 FORWARD LENGTH=375
AT1G07530.1	| Symbols: SCL14, ATGRAS2, GRAS2 | SCARECROW-like 14 | chr1:2313828-2316137 REVERSE LENGTH=769																									1	2	2	2
AT1G07590.1	| Symbols: | Tetratricopeptide repeat (TPR)-like superfamily protein | chr1:2336649-2338481 REVERSE LENGTH=534
AT1G07620.1	| Symbols: ATOBGM | GTP-binding protein Obg/CgtA | chr1:2344556-2346374 REVERSE LENGTH=552																																									1	1	1	1
AT1G07650.2	| Symbols: | Leucine-rich repeat transmembrane protein kinase | chr1:2359817-2366423 REVERSE LENGTH=1020
AT1G07670.1	| Symbols: ATECA4, ECA4 | endomembrane-type CA-ATPase 4 | chr1:2370305-2374196 REVERSE LENGTH=1061					8	9	9	9	11	12	12	12									1	1	1	1
AT1G07700.3	| Symbols: | Thioredoxin superfamily protein | chr1:2380297-2381127 FORWARD LENGTH=217
AT1G07705.2	| Symbols: | NOT2 / NOT3 / NOT5 family | chr1:2382090-2385856 FORWARD LENGTH=614																																													1	1	1	1
AT1G07750.1	| Symbols: | RmlC-like cupins superfamily protein | chr1:2404300-2405863 REVERSE LENGTH=356					1	1	1	1	1	1	1	1																									15	21	21	21	16	27	27	27	19	44	44	44
AT1G07770.1	| Symbols: RPS15A | ribosomal protein S15A | chr1:2408413-2409065 REVERSE LENGTH=130	1	1	0	0.57	5	8	4	6.29	7	17	10	14	1	1	0	0.57	2	2	1	1.57	3	3	1	2.14					1	1	1	1					1	1	0	0.57	1	1	0	0.57
AT1G07780.2	| Symbols: PAI1, TRP6 | phosphoribosylanthranilate isomerase 1 | chr1:2410352-2411833 REVERSE LENGTH=275																									1	1	0	0.5	1	1	0	0.5	2	2	0	1.5					2	2	0	1.5
AT1G07830.1	| Symbols: | ribosomal protein L29 family protein | chr1:2422549-2423392 FORWARD LENGTH=144	1	1	1	1	1	1	1	1	1	2	2	2	2	2	2	2	1	2	2	2									1	1	1	1
AT1G07840.3	| Symbols: | Sas10/Utp3/C1D family | chr1:2424603-2426131 FORWARD LENGTH=279
AT1G07890.1	| Symbols: APX1, MEE6, CS1, ATAPX1, ATAPX01 | ascorbate peroxidase 1 | chr1:2438005-2439435 FORWARD LENGTH=250									6	7	7	7	2	2	2	2					1	1	1	1	3	3	3	3	1	1	1	1					9	14	14	14	10	15	15	15	15	25	24	24.54
AT1G07910.2	| Symbols: ATRNL, RNL, AtRLG1 | RNAligase | chr1:2446712-2454386 FORWARD LENGTH=1104
AT1G07940.2	| Symbols: | GTP binding Elongation factor Tu family protein | chr1:2463350-2464792 REVERSE LENGTH=449	14	16	16	16	16	24	24	24	27	62	62	62	22	47	47	47	19	35	35	35	23	58	58	58	21	60	60	60	24	53	53	53	28	85	85	85	22	48	48	48	23	68	68	68	23	63	63	63
AT1G07960.3	| Symbols: ATPDIL5-1, PDIL5-1 | PDI-like 5-1 | chr1:2467681-2468831 FORWARD LENGTH=146
AT1G07990.1	| Symbols: | SIT4 phosphatase-associated family protein | chr1:2477413-2482898 FORWARD LENGTH=802
AT1G08050.1	| Symbols: | Zinc finger (C3HC4-type RING finger) family protein | chr1:2499088-2501311 REVERSE LENGTH=641
AT1G08100.1	| Symbols: ATNRT2.2, ACH2, NRT2;2AT, NRT2.2 | nitrate transporter 2.2 | chr1:2527268-2529078 REVERSE LENGTH=522
AT1G08110.3	| Symbols: | lactoylglutathione lyase family protein / glyoxalase I family protein | chr1:2535702-2537630 FORWARD LENGTH=185					1	1	1	1																													1	1	1	1					10	12	12	12
AT1G08125.1	| Symbols: | S-adenosyl-L-methionine-dependent methyltransferases superfamily protein | chr1:2539748-2542230 REVERSE LENGTH=315					1	1	1	1
AT1G08130.1	| Symbols: ATLIG1, LIG1 | DNA ligase 1 | chr1:2542913-2547815 REVERSE LENGTH=790
AT1G08140.1	| Symbols: ATCHX6A, CHX6A | cation/H+ exchanger 6A | chr1:2552206-2555074 REVERSE LENGTH=818																																	1	1	1	1
AT1G08200.1	| Symbols: AXS2 | UDP-D-apiose/UDP-D-xylose synthase 2 | chr1:2574259-2576609 REVERSE LENGTH=389									1	1	1	1
AT1G08220.1	| Symbols: | FUNCTIONS IN: molecular_function unknown; INVOLVED IN: mitochondrial proton-transporting ATP synthase complex assembly; LOCATED IN: mitochondrial inner membrane; EXPRESSED IN: 18 plant structures; EXPRESSED DURING: 7 growth stages; CON					1	1	1	1
AT1G08260.1	| Symbols: EMB142, EMB2284, POL2A, TIL1, EMB529, ABO4, ESD7 | DNA polymerase epsilon catalytic subunit | chr1:2590944-2606892 FORWARD LENGTH=2161																																													1	1	1	1
AT1G08340.1	| Symbols: | Rho GTPase activating protein with PAK-box/P21-Rho-binding domain | chr1:2631308-2632669 FORWARD LENGTH=331
AT1G08360.1	| Symbols: | Ribosomal protein L1p/L10e family | chr1:2636231-2637694 FORWARD LENGTH=216					14	19	3	8.02	18	39	7	17.25									6	7	2	3.39
AT1G08370.1	| Symbols: DCP1, ATDCP1 | decapping 1 | chr1:2638355-2640367 FORWARD LENGTH=367	1	1	1	1																																					1	1	1	1	7	7	7	7
AT1G08400.1	| Symbols: | RINT-1 / TIP-1 family | chr1:2643348-2646005 REVERSE LENGTH=804
AT1G08410.1	| Symbols: | P-loop containing nucleoside triphosphate hydrolases superfamily protein | chr1:2646307-2649106 FORWARD LENGTH=589
AT1G08420.2	| Symbols: BSL2 | BRI1 suppressor 1 (BSU1)-like 2 | chr1:2649959-2656564 FORWARD LENGTH=1013
AT1G08450.1	| Symbols: CRT3, PSL1, EBS2, AtCRT3 | calreticulin 3 | chr1:2668008-2671800 REVERSE LENGTH=424					3	4	4	4	7	9	9	9
AT1G08470.1	| Symbols: SSL3 | strictosidine synthase-like 3 | chr1:2682262-2683977 REVERSE LENGTH=390					1	1	1	1
AT1G08480.1	| Symbols: | unknown protein; FUNCTIONS IN: molecular_function unknown; INVOLVED IN: biological_process unknown; LOCATED IN: mitochondrion, plasma membrane, plastid, vacuole; EXPRESSED IN: 27 plant structures; EXPRESSED DURING: 15 growth stages; Ha					1	1	1	1	3	3	3	3
AT1G08490.1	| Symbols: ATSUFS, SUFS, ATCPNIFS, ATNFS2, CPNIFS | chloroplastic NIFS-like cysteine desulfurase | chr1:2685980-2688547 REVERSE LENGTH=463
AT1G08510.1	| Symbols: FATB | fatty acyl-ACP thioesterases B | chr1:2691546-2693409 REVERSE LENGTH=412
AT1G08520.1	| Symbols: ALB1, ALB-1V, V157, PDE166, CHLD | ALBINA 1 | chr1:2696538-2700819 FORWARD LENGTH=760									1	1	1	1
AT1G08550.1	| Symbols: NPQ1, AVDE1 | non-photochemical quenching 1 | chr1:2707462-2709387 FORWARD LENGTH=462
AT1G08560.1	| Symbols: SYP111, KN, ATSYP111 | syntaxin of plants 111 | chr1:2709778-2710710 REVERSE LENGTH=310									1	1	1	1
AT1G08680.2	| Symbols: ZIGA4 | ARF GAP-like zinc finger-containing protein ZIGA4 | chr1:2762820-2768387 FORWARD LENGTH=648					1	1	1	1																	1	1	1	1
AT1G08760.1	| Symbols: | Plant protein of unknown function (DUF936) | chr1:2805478-2808409 FORWARD LENGTH=748
AT1G08770.1	| Symbols: PRA1.E | prenylated RAB acceptor 1.E | chr1:2808933-2809562 FORWARD LENGTH=209					2	2	2	2	1	1	1	1									1	1	1	1
AT1G08780.1	| Symbols: AIP3, PFD4 | ABI3-interacting protein 3 | chr1:2809925-2811126 REVERSE LENGTH=129
AT1G08820.2	| Symbols: VAP27-2 | vamp/synaptobrevin-associated protein 27-2 | chr1:2821810-2824412 REVERSE LENGTH=386																																	2	2	2	2
AT1G08940.1	| Symbols: | Phosphoglycerate mutase family protein | chr1:2877694-2879104 FORWARD LENGTH=281
AT1G08970.2	| Symbols: HAP5C, NF-YC9 | nuclear factor Y, subunit C9 | chr1:2883144-2883839 FORWARD LENGTH=231
AT1G08980.1	| Symbols: ATAMI1, AMI1, ATTOC64-I, TOC64-I | amidase 1 | chr1:2884455-2886430 FORWARD LENGTH=425																																	9	11	11	11	14	21	21	21	17	24	24	24	14	23	23	23
AT1G08990.1	| Symbols: PGSIP5 | plant glycogenin-like starch initiation protein 5 | chr1:2888753-2890753 FORWARD LENGTH=566
AT1G09010.1	| Symbols: | glycoside hydrolase family 2 protein | chr1:2895259-2899287 REVERSE LENGTH=944																																													5	5	5	5
AT1G09020.1	| Symbols: SNF4, ATSNF4 | homolog of yeast sucrose nonfermenting 4 | chr1:2900149-2904212 REVERSE LENGTH=487													1	1	1	1	2	2	2	2	1	1	1	1
AT1G09040.1	| Symbols: | unknown protein; FUNCTIONS IN: molecular_function unknown; INVOLVED IN: biological_process unknown; LOCATED IN: membrane; EXPRESSED IN: leaf; BEST Arabidopsis thaliana protein match is: unknown protein (TAIR:AT1G09050.1); Has 614 Blast
AT1G09100.1	| Symbols: RPT5B | 26S proteasome AAA-ATPase subunit RPT5B | chr1:2936675-2939258 REVERSE LENGTH=423	1	1	0	0.07	5	6	0	1.14	13	15	2	4.35									6	8	0	1.52									2	2	0	0.38
AT1G09130.2	| Symbols: | ATP-dependent caseinolytic (Clp) protease/crotonase family protein | chr1:2940063-2942217 REVERSE LENGTH=330
AT1G09140.2	| Symbols: ATSRP30, SR30, At-SR30 | SERINE-ARGININE PROTEIN 30 | chr1:2943528-2945818 REVERSE LENGTH=256
AT1G09150.1	| Symbols: | pseudouridine synthase and archaeosine transglycosylase (PUA) domain-containing protein | chr1:2946599-2948908 FORWARD LENGTH=181																																					2	2	2	2	3	3	3	3	4	5	5	5
AT1G09210.1	| Symbols: CRT1b, AtCRT1b | calreticulin 1b | chr1:2973217-2976655 REVERSE LENGTH=424					4	4	0	1.92	6	8	4	5.92
AT1G09270.2	| Symbols: IMPA-4 | importin alpha isoform 4 | chr1:2994506-2997833 FORWARD LENGTH=538					1	1	1	1	3	3	2	2.14
AT1G09290.1	| Symbols: | unknown protein; Has 73 Blast hits to 71 proteins in 26 species: Archae - 0; Bacteria - 0; Metazoa - 5; Fungi - 11; Plants - 54; Viruses - 0; Other Eukaryotes - 3 (source: NCBI BLink). | chr1:3001682-3003715 REVERSE LENGTH=348
AT1G09300.1	| Symbols: | Metallopeptidase M24 family protein | chr1:3003981-3008131 FORWARD LENGTH=493
AT1G09310.1	| Symbols: | Protein of unknown function, DUF538 | chr1:3009109-3009648 FORWARD LENGTH=179													1	1	0	0.1	1	1	0	0.1	1	1	0	0.1	1	1	0	0.1					1	1	0	0.1	1	1	1	1	1	1	0	0.1
AT1G09330.1	| Symbols: | unknown protein; FUNCTIONS IN: molecular_function unknown; INVOLVED IN: biological_process unknown; LOCATED IN: integral to membrane; EXPRESSED IN: 24 plant structures; EXPRESSED DURING: 15 growth stages; CONTAINS InterPro DOMAIN/s: Pr					3	4	4	4	1	1	1	1
AT1G09340.1	| Symbols: CRB, CSP41B, HIP1.3 | chloroplast RNA binding | chr1:3015473-3018035 FORWARD LENGTH=378					4	5	5	5	3	4	4	4
AT1G09390.1	| Symbols: | GDSL-like Lipase/Acylhydrolase superfamily protein | chr1:3031264-3033415 FORWARD LENGTH=370																	1	1	1	1
AT1G09420.2	| Symbols: G6PD4 | glucose-6-phosphate dehydrogenase 4 | chr1:3038640-3041715 REVERSE LENGTH=635
AT1G09430.1	| Symbols: ACLA-3 | ATP-citrate lyase A-3 | chr1:3042135-3044978 FORWARD LENGTH=424									2	2	1	1.31
AT1G09470.1	| Symbols: | unknown protein; FUNCTIONS IN: molecular_function unknown; EXPRESSED IN: cotyledon; BEST Arabidopsis thaliana protein match is: unknown protein (TAIR:AT5G26770.1); Has 55019 Blast hits to 30094 proteins in 2088 species: Archae - 730; B																					1	1	1	1
AT1G09480.1	| Symbols: | NAD(P)-binding Rossmann-fold superfamily protein | chr1:3057975-3060661 FORWARD LENGTH=369
AT1G09490.1	| Symbols: | NAD(P)-binding Rossmann-fold superfamily protein | chr1:3064172-3065815 FORWARD LENGTH=322
AT1G09500.1	| Symbols: | NAD(P)-binding Rossmann-fold superfamily protein | chr1:3066811-3068484 FORWARD LENGTH=325																																													1	1	1	1
AT1G09550.1	| Symbols: | Pectinacetylesterase family protein | chr1:3089733-3092254 REVERSE LENGTH=388									1	1	1	1
AT1G09560.1	| Symbols: GLP5 | germin-like protein 5 | chr1:3093896-3094639 FORWARD LENGTH=219																	1	1	1	1
AT1G09590.1	| Symbols: | Translation protein SH3-like family protein | chr1:3106549-3107606 FORWARD LENGTH=164					5	5	5	5	8	19	19	19									2	2	2	2
AT1G09620.1	| Symbols: | ATP binding;leucine-tRNA ligases;aminoacyl-tRNA ligases;nucleotide binding;ATP binding;aminoacyl-tRNA ligases | chr1:3113077-3116455 REVERSE LENGTH=1091									6	6	6	6
AT1G09630.1	| Symbols: ATRAB11C, ATRABA2A, ATRAB-A2A, RAB-A2A, RAB11c | RAB GTPase 11C | chr1:3118350-3119571 REVERSE LENGTH=217					5	6	4	4.63	4	4	2	2.54	2	2	1	1.17	2	2	1	1.17	2	2	2	2	2	2	1	1.17	2	2	1	1.17	1	1	0	0.17	1	1	0	0.17
AT1G09640.1	| Symbols: | Translation elongation factor EF1B, gamma chain | chr1:3120162-3122152 FORWARD LENGTH=414					1	1	1	1	3	4	3	3.44									2	2	1	1.44					3	3	1	1.88													2	3	0	1.33
AT1G09700.1	| Symbols: HYL1, DRB1 | dsRNA-binding domain-like superfamily protein | chr1:3137960-3140118 REVERSE LENGTH=419																	1	1	1	1
AT1G09710.2	| Symbols: | Homeodomain-like superfamily protein | chr1:3141119-3144232 FORWARD LENGTH=650																																													1	1	1	1
AT1G09730.2	| Symbols: | Cysteine proteinases superfamily protein | chr1:3148017-3154236 REVERSE LENGTH=931
AT1G09750.1	| Symbols: | Eukaryotic aspartyl protease family protein | chr1:3157541-3158960 FORWARD LENGTH=449	1	1	1	1									2	2	2	2	2	2	2	2	2	2	2	2
AT1G09760.1	| Symbols: U2A' | U2 small nuclear ribonucleoprotein A | chr1:3159476-3161603 REVERSE LENGTH=249					5	5	5	5	6	7	7	7													1	1	1	1	1	1	1	1					4	4	4	4	7	7	7	7	1	1	1	1
AT1G09770.1	| Symbols: ATCDC5, CDC5, ATMYBCDC5 | cell division cycle 5 | chr1:3162002-3165122 FORWARD LENGTH=844					5	5	5	5	10	11	11	11
AT1G09780.1	| Symbols: | Phosphoglycerate mutase, 2,3-bisphosphoglycerate-independent | chr1:3165550-3167812 REVERSE LENGTH=557																																					3	3	0	1.48	7	8	0	3.94	12	22	0	10.83
AT1G09795.1	| Symbols: ATATP-PRT2, HISN1B, ATP-PRT2 | ATP phosphoribosyl transferase 2 | chr1:3173588-3176690 FORWARD LENGTH=413									1	1	1	1																									5	5	5	5	4	4	4	4	4	5	5	5
AT1G09800.1	| Symbols: | Pseudouridine synthase family protein | chr1:3177121-3180336 REVERSE LENGTH=372
AT1G09820.1	| Symbols: | Pentatricopeptide repeat (PPR-like) superfamily protein | chr1:3190594-3192414 REVERSE LENGTH=606													1	1	1	1
AT1G09830.1	| Symbols: | Glycinamide ribonucleotide (GAR) synthetase | chr1:3192783-3194936 REVERSE LENGTH=532
AT1G09860.1	| Symbols: ATPUP16, PUP16 | purine permease 16 | chr1:3204136-3205287 REVERSE LENGTH=383
AT1G09870.1	| Symbols: | histidine acid phosphatase family protein | chr1:3205817-3208444 FORWARD LENGTH=487									1	1	1	1
AT1G09900.1	| Symbols: | Pentatricopeptide repeat (PPR-like) superfamily protein | chr1:3218133-3219929 FORWARD LENGTH=598	1	1	1	1
AT1G10120.1	| Symbols: | basic helix-loop-helix (bHLH) DNA-binding superfamily protein | chr1:3304228-3305984 REVERSE LENGTH=366
AT1G10170.1	| Symbols: ATNFXL1, NFXL1 | NF-X-like 1 | chr1:3333925-3337491 REVERSE LENGTH=1188
AT1G10180.1	| Symbols: | BEST Arabidopsis thaliana protein match is: exocyst complex component 84B (TAIR:AT5G49830.1); Has 132 Blast hits to 132 proteins in 25 species: Archae - 0; Bacteria - 0; Metazoa - 7; Fungi - 0; Plants - 117; Viruses - 0; Other Eukaryot
AT1G10200.1	| Symbols: WLIM1 | GATA type zinc finger transcription factor family protein | chr1:3346677-3347763 REVERSE LENGTH=190													1	2	2	2	1	1	1	1	1	1	1	1
AT1G10230.1	| Symbols: ASK18, SK18 | SKP1-like 18 | chr1:3355600-3356151 FORWARD LENGTH=183
AT1G10270.1	| Symbols: GRP23 | glutamine-rich protein 23 | chr1:3363535-3366276 FORWARD LENGTH=913					2	2	2	2	2	2	2	2
AT1G10290.1	| Symbols: ADL6, DRP2A | dynamin-like protein 6 | chr1:3370774-3377120 FORWARD LENGTH=914					6	7	1	4.43	7	7	3	5.29
AT1G10310.1	| Symbols: | NAD(P)-binding Rossmann-fold superfamily protein | chr1:3381733-3383874 REVERSE LENGTH=242									1	1	1	1
AT1G10360.1	| Symbols: ATGSTU18, GST29, GSTU18 | glutathione S-transferase TAU 18 | chr1:3395738-3396806 REVERSE LENGTH=227																																	1	1	1	1	2	2	2	2					1	2	2	2
AT1G10370.1	| Symbols: GST30, ATGSTU17, GST30B, ERD9 | Glutathione S-transferase family protein | chr1:3397274-3398273 REVERSE LENGTH=227																					8	12	12	12	10	13	13	13	8	14	14	14	9	18	18	18	8	10	10	10	8	11	11	11	4	5	5	5
AT1G10390.2	| Symbols: | Nucleoporin autopeptidase | chr1:3407265-3412045 REVERSE LENGTH=1041	4	4	4	4	1	2	2	2					6	6	6	6	2	2	2	2	2	3	3	3
AT1G10430.1	| Symbols: PP2A-2 | protein phosphatase 2A-2 | chr1:3428705-3430437 REVERSE LENGTH=306									2	2	0	0.33
AT1G10450.1	| Symbols: SNL6 | SIN3-like 6 | chr1:3432313-3437979 FORWARD LENGTH=1122																					1	1	1	1
AT1G10500.1	| Symbols: ATCPISCA, CPISCA | chloroplast-localized ISCA-like protein | chr1:3460160-3461340 REVERSE LENGTH=180													4	4	4	4	2	3	3	3	4	5	5	5	2	2	2	2	1	1	1	1	2	2	2	2
AT1G10580.1	| Symbols: | Transducin/WD40 repeat-like superfamily protein | chr1:3491560-3493665 REVERSE LENGTH=573					2	2	2	2	2	2	2	2
AT1G10590.2	| Symbols: | Nucleic acid-binding, OB-fold-like protein | chr1:3502324-3502991 REVERSE LENGTH=139					1	1	1	1																													2	2	2	2	3	3	3	3	3	3	3	3
AT1G10670.2	| Symbols: ACLA-1 | ATP-citrate lyase A-1 | chr1:3535787-3538098 FORWARD LENGTH=423					1	1	1	1	4	4	3	3.69									1	1	1	1																					1	1	1	1
AT1G10700.1	| Symbols: PRS3 | phosphoribosyl pyrophosphate (PRPP) synthase 3 | chr1:3554157-3556274 FORWARD LENGTH=411
AT1G10760.1	| Symbols: SEX1, SOP1, SOP, GWD1, GWD | Pyruvate phosphate dikinase, PEP/pyruvate binding domain | chr1:3581210-3590043 REVERSE LENGTH=1399													5	5	5	5	3	4	4	4	3	3	3	3	1	1	1	1
AT1G10840.1	| Symbols: TIF3H1 | translation initiation factor 3 subunit H1 | chr1:3607885-3610299 REVERSE LENGTH=337					12	13	13	13	12	12	12	12									2	2	2	2
AT1G10850.1	| Symbols: | Leucine-rich repeat protein kinase family protein | chr1:3612228-3614343 FORWARD LENGTH=663
AT1G10870.1	| Symbols: AGD4 | ARF-GAP domain 4 | chr1:3616905-3623612 REVERSE LENGTH=775
AT1G10940.2	| Symbols: | Protein kinase superfamily protein | chr1:3656050-3658170 REVERSE LENGTH=371									2	2	0	0.51	2	2	0	0.53	3	3	0	0.82	4	4	0	1.12					1	1	0	0.29	2	2	0	0.59
AT1G10950.1	| Symbols: TMN1, AtTMN1 | transmembrane nine 1 | chr1:3659322-3663622 FORWARD LENGTH=589					2	2	2	2
AT1G10960.1	| Symbols: ATFD1, FD1 | ferredoxin 1 | chr1:3664445-3664891 FORWARD LENGTH=148
AT1G11070.1	| Symbols: | BEST Arabidopsis thaliana protein match is: Hydroxyproline-rich glycoprotein family protein (TAIR:AT1G61080.1); Has 579 Blast hits to 567 proteins in 152 species: Archae - 0; Bacteria - 68; Metazoa - 159; Fungi - 113; Plants - 172; Vir																					1	1	1	1
AT1G11260.1	| Symbols: STP1, ATSTP1 | sugar transporter 1 | chr1:3777460-3780133 FORWARD LENGTH=522					1	1	1	1
AT1G11300.1	| Symbols: | protein serine/threonine kinases;protein kinases;ATP binding;sugar binding;kinases;carbohydrate binding | chr1:3794389-3800719 FORWARD LENGTH=1650					1	1	1	1
AT1G11330.1	| Symbols: | S-locus lectin protein kinase family protein | chr1:3810372-3813416 FORWARD LENGTH=840													3	3	3	3	1	1	1	1					1	1	1	1
AT1G11360.1	| Symbols: | Adenine nucleotide alpha hydrolases-like superfamily protein | chr1:3822171-3822899 REVERSE LENGTH=242
AT1G11390.1	| Symbols: | Protein kinase superfamily protein | chr1:3834762-3837305 REVERSE LENGTH=624																					1	1	1	1
AT1G11400.2	| Symbols: PYM | partner of Y14-MAGO | chr1:3838777-3839978 FORWARD LENGTH=204									2	2	2	2
AT1G11410.1	| Symbols: | S-locus lectin protein kinase family protein | chr1:3841286-3844284 FORWARD LENGTH=845																																									1	1	1	1
AT1G11430.1	| Symbols: | plastid developmental protein DAG, putative | chr1:3847273-3848938 FORWARD LENGTH=232													5	5	5	5					3	3	3	3	8	9	9	9	4	4	4	4	3	4	4	4	2	2	2	2
AT1G11450.1	| Symbols: | nodulin MtN21 /EamA-like transporter family protein | chr1:3854005-3855259 FORWARD LENGTH=260
AT1G11475.1	| Symbols: NRPB10, NRPD10, NRPE10 | RNA polymerases N / 8 kDa subunit | chr1:3862520-3863805 FORWARD LENGTH=71
AT1G11480.2	| Symbols: | eukaryotic translation initiation factor-related | chr1:3864368-3866707 REVERSE LENGTH=565	1	1	1	1									1	1	1	1	2	2	2	2	1	1	1	1
AT1G11530.1	| Symbols: ATCXXS1, CXXS1 | C-terminal cysteine residue is changed to a serine 1 | chr1:3874518-3875311 FORWARD LENGTH=118																					1	2	2	2
AT1G11570.2	| Symbols: NTL | NTF2-like | chr1:3883280-3883956 FORWARD LENGTH=132
AT1G11580.1	| Symbols: ATPMEPCRA, PMEPCRA | methylesterase PCR A | chr1:3888730-3890649 FORWARD LENGTH=557	16	34	34	34	3	5	5	5	6	8	8	8	23	109	109	109	23	68	68	68	24	61	61	61	11	15	15	15	8	13	13	13	6	8	8	8	2	3	3	3	2	3	3	3	2	2	2	2
AT1G11650.2	| Symbols: ATRBP45B, RBP45B | RNA-binding (RRM/RBD/RNP motifs) family protein | chr1:3914895-3917941 FORWARD LENGTH=405																									2	3	3	3	4	4	4	4	1	1	1	1	3	5	5	5	3	4	4	4	7	9	9	9
AT1G11660.1	| Symbols: | heat shock protein 70 (Hsp 70) family protein | chr1:3921056-3924347 FORWARD LENGTH=763
AT1G11680.1	| Symbols: CYP51G1, EMB1738, CYP51A2, CYP51 | CYTOCHROME P450 51G1 | chr1:3938925-3940585 FORWARD LENGTH=488					3	3	3	3	3	3	3	3
AT1G11710.1	| Symbols: | Pentatricopeptide repeat (PPR) superfamily protein | chr1:3948886-3950859 FORWARD LENGTH=657
AT1G11720.1	| Symbols: ATSS3, SS3 | starch synthase 3 | chr1:3952460-3956840 FORWARD LENGTH=1042
AT1G11750.1	| Symbols: CLPP6, NCLPP1, NCLPP6 | CLP protease proteolytic subunit 6 | chr1:3967609-3969535 FORWARD LENGTH=271									1	1	1	1
AT1G11780.1	| Symbols: | oxidoreductase, 2OG-Fe(II) oxygenase family protein | chr1:3977614-3979177 REVERSE LENGTH=345
AT1G11790.1	| Symbols: ADT1 | arogenate dehydratase 1 | chr1:3981476-3984962 FORWARD LENGTH=392																									1	1	1	1									1	1	1	1
AT1G11800.1	| Symbols: | endonuclease/exonuclease/phosphatase family protein | chr1:3985520-3987263 REVERSE LENGTH=441																	1	1	1	1	1	1	1	1	1	1	1	1					1	1	1	1
AT1G11820.1	| Symbols: | O-Glycosyl hydrolases family 17 protein | chr1:3991259-3993327 REVERSE LENGTH=384																																	5	5	5	5					1	1	1	1
AT1G11840.2	| Symbols: ATGLX1, GLX1 | glyoxalase I homolog | chr1:3996045-3997518 FORWARD LENGTH=283													9	12	11	11.55	7	9	8	8.55	12	17	15	16.1	16	51	40	46.05	17	48	44	46.2	22	66	52	59.7	11	15	14	14.55	13	23	19	21.2	9	12	9	10.65
AT1G11860.2	| Symbols: | Glycine cleavage T-protein family | chr1:4001801-4003245 FORWARD LENGTH=408					1	1	1	1	1	1	1	1	24	40	40	40	17	31	31	31	27	53	53	53	10	15	15	15	6	6	6	6	8	10	10	10	13	13	13	13	8	10	10	10	8	11	11	11
AT1G11870.2	| Symbols: ATSRS, SRS | Seryl-tRNA synthetase | chr1:4003895-4006556 FORWARD LENGTH=514
AT1G11890.1	| Symbols: SEC22, ATSEC22 | Synaptobrevin family protein | chr1:4011509-4012835 FORWARD LENGTH=218	5	5	5	5	2	2	2	2	2	2	2	2	6	7	7	7	5	5	5	5	5	7	7	7
AT1G11910.1	| Symbols: APA1, ATAPA1 | aspartic proteinase A1 | chr1:4017119-4019874 REVERSE LENGTH=506					10	10	8	9.69	11	11	8	10.54									2	2	2	2
AT1G11930.2	| Symbols: | Predicted pyridoxal phosphate-dependent enzyme, YBL036C type | chr1:4028783-4030298 FORWARD LENGTH=255																																					5	5	5	5	5	5	5	5	6	8	8	8
AT1G11950.1	| Symbols: | Transcription factor jumonji (jmjC) domain-containing protein | chr1:4034747-4038310 REVERSE LENGTH=875																													1	1	1	1	1	1	1	1
AT1G12000.1	| Symbols: | Phosphofructokinase family protein | chr1:4050159-4053727 REVERSE LENGTH=566					1	1	1	1	11	12	9	11.88					1	1	1	1	2	2	2	2	1	2	2	2					1	1	1	1	13	15	14	14.96	14	20	17	19.88	21	26	18	25.68
AT1G12010.1	| Symbols: | 2-oxoglutarate (2OG) and Fe(II)-dependent oxygenase superfamily protein | chr1:4056274-4057670 FORWARD LENGTH=320
AT1G12050.1	| Symbols: | fumarylacetoacetase, putative | chr1:4072904-4075856 FORWARD LENGTH=421																																	6	7	7	7	7	8	8	8	7	8	8	8	10	13	13	13
AT1G12140.1	| Symbols: FMO GS-OX5 | flavin-monooxygenase glucosinolate S-oxygenase 5 | chr1:4121386-4123366 FORWARD LENGTH=459
AT1G12160.1	| Symbols: | Flavin-binding monooxygenase family protein | chr1:4126068-4128090 FORWARD LENGTH=468
AT1G12200.1	| Symbols: | Flavin-binding monooxygenase family protein | chr1:4137627-4139835 FORWARD LENGTH=465
AT1G12220.2	| Symbols: RPS5 | Disease resistance protein (CC-NBS-LRR class) family | chr1:4145011-4147680 FORWARD LENGTH=889
AT1G12230.1	| Symbols: | Aldolase superfamily protein | chr1:4148050-4150708 FORWARD LENGTH=405									1	1	1	1
AT1G12250.1	| Symbols: | Pentapeptide repeat-containing protein | chr1:4159287-4161269 FORWARD LENGTH=280	2	2	2	2									2	2	2	2	3	3	3	3	2	3	3	3					1	1	1	1
AT1G12270.1	| Symbols: Hop1 | stress-inducible protein, putative | chr1:4172105-4174575 FORWARD LENGTH=572																																									1	1	1	1	13	15	12	13.82
AT1G12310.1	| Symbols: | Calcium-binding EF-hand family protein | chr1:4187500-4187946 REVERSE LENGTH=148																																					4	4	0	2.22	4	4	0	2.22	9	11	5	8.33
AT1G12350.1	| Symbols: ATCOAB, COAB | 4-phospho-panto-thenoylcysteine synthetase | chr1:4198870-4200633 FORWARD LENGTH=317																																					2	2	2	2	2	2	2	2	9	12	12	12
AT1G12370.1	| Symbols: PHR1, UVR2 | photolyase 1 | chr1:4206500-4208842 REVERSE LENGTH=490
AT1G12410.1	| Symbols: CLPR2, NCLPP2, CLP2 | CLP protease proteolytic subunit 2 | chr1:4223099-4224954 FORWARD LENGTH=279																																					1	1	1	1	1	1	1	1
AT1G12440.2	| Symbols: | A20/AN1-like zinc finger family protein | chr1:4241816-4242322 REVERSE LENGTH=168													2	2	2	2	1	1	1	1					1	1	1	1
AT1G12470.1	| Symbols: | zinc ion binding | chr1:4251359-4257201 FORWARD LENGTH=988
AT1G12530.1	| Symbols: | unknown protein; BEST Arabidopsis thaliana protein match is: unknown protein (TAIR:AT1G56420.1); Has 54 Blast hits to 53 proteins in 13 species: Archae - 0; Bacteria - 0; Metazoa - 0; Fungi - 0; Plants - 54; Viruses - 0; Other Eukaryot
AT1G12550.1	| Symbols: | D-isomer specific 2-hydroxyacid dehydrogenase family protein | chr1:4274649-4275831 FORWARD LENGTH=323
AT1G12640.1	| Symbols: | MBOAT (membrane bound O-acyl transferase) family protein | chr1:4303586-4305666 REVERSE LENGTH=462					1	1	1	1	2	2	2	2
AT1G12780.1	| Symbols: UGE1, ATUGE1 | UDP-D-glucose/UDP-D-galactose 4-epimerase 1 | chr1:4356124-4358120 REVERSE LENGTH=351									1	1	1	1																									13	15	11	13.62	12	15	9	13.1	24	39	24	33.42
AT1G12800.1	| Symbols: | Nucleic acid-binding, OB-fold-like protein | chr1:4361778-4365189 REVERSE LENGTH=767																	1	2	2	2
AT1G12820.1	| Symbols: AFB3 | auxin signaling F-box 3 | chr1:4368879-4370780 REVERSE LENGTH=577
AT1G12830.1	| Symbols: | unknown protein; FUNCTIONS IN: molecular_function unknown; INVOLVED IN: biological_process unknown; LOCATED IN: cellular_component unknown; EXPRESSED IN: 23 plant structures; EXPRESSED DURING: 13 growth stages; Has 39778 Blast hits to
AT1G12840.1	| Symbols: DET3, ATVHA-C | vacuolar ATP synthase subunit C (VATC) / V-ATPase C subunit / vacuolar proton pump C subunit (DET3) | chr1:4375584-4378220 FORWARD LENGTH=375					8	10	10	10	5	7	7	7									1	1	1	1					1	2	2	2					14	19	19	19	12	16	16	16	13	18	18	18
AT1G12900.4	| Symbols: GAPA-2 | glyceraldehyde 3-phosphate dehydrogenase A subunit 2 | chr1:4392634-4393850 REVERSE LENGTH=350	3	3	0	1.24	9	13	0	5.11	12	23	3	10.75	1	1	0	0.41	1	1	0	0.17	8	12	1	5.28	2	2	0	0.58	1	1	0	0.41	4	6	1	3.06	11	14	3	7.04	10	14	3	7.28	11	20	5	10.93
AT1G12910.1	| Symbols: ATAN11, LWD1 | Transducin/WD40 repeat-like superfamily protein | chr1:4395114-4396154 REVERSE LENGTH=346
AT1G12920.1	| Symbols: ERF1-2 | eukaryotic release factor 1-2 | chr1:4396555-4397859 REVERSE LENGTH=434					3	3	1	1.69	4	5	1	2.38									1	2	2	2
AT1G12930.1	| Symbols: | ARM repeat superfamily protein | chr1:4398588-4405495 REVERSE LENGTH=1005
AT1G12970.1	| Symbols: PIRL3 | plant intracellular ras group-related LRR 3 | chr1:4423727-4425632 FORWARD LENGTH=464
AT1G13020.1	| Symbols: EIF4B2 | eukaryotic initiation factor 4B2 | chr1:4440927-4443520 REVERSE LENGTH=549	1	1	1	1									2	3	3	3					2	2	2	2	2	3	3	3	2	2	1	1.5	3	3	1	2
AT1G13030.1	| Symbols: | sphere organelles protein-related | chr1:4444284-4447278 REVERSE LENGTH=608
AT1G13060.1	| Symbols: PBE1 | 20S proteasome beta subunit E1 | chr1:4452641-4454663 FORWARD LENGTH=274																													4	4	3	3.5
AT1G13100.1	| Symbols: CYP71B29 | cytochrome P450, family 71, subfamily B, polypeptide 29 | chr1:4463983-4465538 FORWARD LENGTH=490
AT1G13180.1	| Symbols: DIS1, ARP3, ATARP3 | Actin-like ATPase superfamily protein | chr1:4495394-4498204 FORWARD LENGTH=427
AT1G13270.2	| Symbols: MAP1C, MAP1B | methionine aminopeptidase 1B | chr1:4544999-4546574 FORWARD LENGTH=283
AT1G13280.1	| Symbols: AOC4 | allene oxide cyclase 4 | chr1:4547624-4548552 FORWARD LENGTH=254	7	9	8	8.58	2	2	2	2	1	1	1	1	7	12	11	11.58	5	10	10	10	6	13	13	13	3	3	3	3	4	4	4	4	3	3	3	3									1	1	1	1
AT1G13320.3	| Symbols: PP2AA3 | protein phosphatase 2A subunit A3 | chr1:4563692-4567348 REVERSE LENGTH=587									3	3	2	2.57
AT1G13330.1	| Symbols: AHP2 | Arabidopsis Hop2 homolog | chr1:4568008-4569410 FORWARD LENGTH=226
AT1G13360.1	| Symbols: | unknown protein; BEST Arabidopsis thaliana protein match is: unknown protein (TAIR:AT3G25870.1); Has 69 Blast hits to 69 proteins in 16 species: Archae - 0; Bacteria - 0; Metazoa - 6; Fungi - 0; Plants - 63; Viruses - 0; Other Eukaryot
AT1G13440.1	| Symbols: GAPC-2, GAPC2 | glyceraldehyde-3-phosphate dehydrogenase C2 | chr1:4608465-4610494 REVERSE LENGTH=338	11	15	0	9.38	18	43	3	28	32	143	11	93.5	7	7	1	4.75	5	8	0	5	22	57	2	36.38	12	18	0	11.25	14	21	1	13.5	15	26	1	16.62	19	29	3	19.25	14	23	1	14.75	13	21	0	13.12
AT1G13470.1	| Symbols: | Protein of unknown function (DUF1262) | chr1:4620322-4621542 REVERSE LENGTH=379																									1	1	1	1
AT1G13540.1	| Symbols: | Protein of unknown function (DUF1262) | chr1:4635474-4636708 REVERSE LENGTH=381
AT1G13690.1	| Symbols: ATE1 | ATPase E1 | chr1:4693380-4694179 FORWARD LENGTH=177					2	2	2	2	2	2	2	2
AT1G13730.1	| Symbols: | Nuclear transport factor 2 (NTF2) family protein with RNA binding (RRM-RBD-RNP motifs) domain | chr1:4710519-4712332 FORWARD LENGTH=428									1	1	1	1
AT1G13870.1	| Symbols: DRL1, AtKTI12 | calmodulin binding;purine nucleotide binding | chr1:4747437-4748345 REVERSE LENGTH=302
AT1G13900.1	| Symbols: | Purple acid phosphatases superfamily protein | chr1:4753494-4755554 REVERSE LENGTH=656
AT1G13930.2	| Symbols: | Involved in response to salt stress. Knockout mutants are hypersensitive to salt stress. | chr1:4761091-4761558 FORWARD LENGTH=155	3	3	1	2.06									2	2	1	1.53	1	1	0	0.53	2	2	1	1.53	1	1	1	1	1	1	1	1	3	4	4	4	7	12	11	11.53	7	11	11	11	7	10	9	9.53
AT1G13950.1	| Symbols: EIF-5A, ELF5A-1, ATELF5A-1, EIF5A | eukaryotic elongation factor 5A-1 | chr1:4773631-4774668 FORWARD LENGTH=158									1	2	0	0.09
AT1G14000.1	| Symbols: VIK | VH1-interacting kinase | chr1:4797606-4800043 FORWARD LENGTH=438													13	17	17	17	7	11	11	11	17	22	21	21.76	6	7	7	7	6	6	6	6	6	6	6	6					3	3	3	3
AT1G14030.1	| Symbols: | Rubisco methyltransferase family protein | chr1:4805493-4807440 REVERSE LENGTH=482
AT1G14130.1	| Symbols: | 2-oxoglutarate (2OG) and Fe(II)-dependent oxygenase superfamily protein | chr1:4836041-4837040 REVERSE LENGTH=308																																					3	3	3	3	3	3	3	3	3	3	3	3
AT1G14210.1	| Symbols: | Ribonuclease T2 family protein | chr1:4856902-4857941 REVERSE LENGTH=247									2	2	2	2	4	4	4	4	3	3	3	3	4	5	5	5	8	9	9	9	7	8	8	8	8	13	13	13	8	10	10	10	9	10	10	10	7	9	9	9
AT1G14300.1	| Symbols: | ARM repeat superfamily protein | chr1:4882654-4884686 REVERSE LENGTH=339
AT1G14310.1	| Symbols: | Haloacid dehalogenase-like hydrolase (HAD) superfamily protein | chr1:4885049-4886672 FORWARD LENGTH=254																																	1	1	1	1	1	1	1	1					1	1	1	1
AT1G14320.1	| Symbols: SAC52, RPL10, RPL10A | Ribosomal protein L16p/L10e family protein | chr1:4888270-4889408 FORWARD LENGTH=220					5	6	2	4.4	8	14	2	9.2									2	2	0	1.2					1	1	0	0.6
AT1G14410.1	| Symbols: ATWHY1, PTAC1, WHY1 | ssDNA-binding transcriptional regulator | chr1:4929352-4930810 REVERSE LENGTH=263					4	4	4	4	4	4	4	4													1	1	1	1	1	1	1	1					3	4	3	3.5	4	5	4	4.5	2	3	3	3
AT1G14460.1	| Symbols: | AAA-type ATPase family protein | chr1:4948962-4952750 REVERSE LENGTH=1116
AT1G14510.1	| Symbols: AL7 | alfin-like 7 | chr1:4962171-4964154 REVERSE LENGTH=252
AT1G14540.1	| Symbols: | Peroxidase superfamily protein | chr1:4974233-4975600 REVERSE LENGTH=315	1	1	1	1									6	7	7	7	5	6	6	6	2	2	2	2
AT1G14570.2	| Symbols: | UBX domain-containing protein | chr1:4983770-4987192 FORWARD LENGTH=468
AT1G14610.1	| Symbols: TWN2, VALRS | valyl-tRNA synthetase / valine--tRNA ligase (VALRS) | chr1:5008502-5014486 REVERSE LENGTH=1108																					1	1	1	1					1	1	1	1					43	55	55	55	36	46	46	46	32	49	49	49
AT1G14620.1	| Symbols: DECOY | decoy | chr1:5014948-5016501 REVERSE LENGTH=233					1	1	1	1
AT1G14640.1	| Symbols: | SWAP (Suppressor-of-White-APricot)/surp domain-containing protein | chr1:5023656-5025955 FORWARD LENGTH=735
AT1G14650.2	| Symbols: | SWAP (Suppressor-of-White-APricot)/surp domain-containing protein / ubiquitin family protein | chr1:5028077-5030520 FORWARD LENGTH=785													4	4	4	4	3	3	3	3	5	5	5	5	2	2	2	2	3	3	3	3	1	1	1	1
AT1G14686.1	| Symbols: | ENTH/ANTH/VHS superfamily protein | chr1:5045781-5046800 REVERSE LENGTH=339
AT1G14700.2	| Symbols: PAP3, ATPAP3 | purple acid phosphatase 3 | chr1:5058680-5060988 FORWARD LENGTH=364
AT1G14710.2	| Symbols: | hydroxyproline-rich glycoprotein family protein | chr1:5062168-5064697 REVERSE LENGTH=601					1	1	1	1	2	2	2	2	13	14	14	14	7	8	8	8	15	16	16	16	19	21	21	21	9	10	10	10	13	14	14	14	10	12	12	12	7	7	7	7	7	7	7	7
AT1G14810.1	| Symbols: | semialdehyde dehydrogenase family protein | chr1:5102684-5104633 REVERSE LENGTH=375					4	4	4	4	5	5	5	5					1	1	1	1	3	4	4	4	2	3	3	3	1	1	1	1	2	2	2	2	2	2	2	2	2	2	2	2	1	1	1	1
AT1G14820.2	| Symbols: | Sec14p-like phosphatidylinositol transfer family protein | chr1:5105237-5106454 REVERSE LENGTH=239																									1	2	2	2	1	1	1	1													1	1	1	1
AT1G14830.1	| Symbols: ADL1C, ADL5, DRP1C, DL1C | DYNAMIN-like 1C | chr1:5107699-5111470 REVERSE LENGTH=614					1	1	1	1	4	4	3	3.38
AT1G14850.1	| Symbols: NUP155 | nucleoporin 155 | chr1:5116921-5123259 REVERSE LENGTH=1464
AT1G14980.1	| Symbols: CPN10 | chaperonin 10 | chr1:5165930-5166654 REVERSE LENGTH=98													3	3	3	3	4	4	4	4	4	5	5	5	3	4	4	4	5	6	6	6	3	3	3	3	3	3	3	3	3	4	4	4	3	3	3	3
AT1G15000.1	| Symbols: scpl50 | serine carboxypeptidase-like 50 | chr1:5168613-5169947 FORWARD LENGTH=444																																					8	9	9	9	5	5	5	5	6	6	6	6
AT1G15060.1	| Symbols: | Uncharacterised conserved protein UCP031088, alpha/beta hydrolase | chr1:5184053-5186856 REVERSE LENGTH=578
AT1G15130.1	| Symbols: | Endosomal targeting BRO1-like domain-containing protein | chr1:5206217-5209848 REVERSE LENGTH=846																																													10	10	10	10
AT1G15140.1	| Symbols: | FAD/NAD(P)-binding oxidoreductase | chr1:5210403-5212137 REVERSE LENGTH=295									1	1	1	1																									8	9	9	9	5	6	6	6	8	8	8	8
AT1G15280.1	| Symbols: | CASC3/Barentsz eIF4AIII binding | chr1:5252538-5256214 FORWARD LENGTH=584
AT1G15290.1	| Symbols: | Tetratricopeptide repeat (TPR)-like superfamily protein | chr1:5257327-5264814 REVERSE LENGTH=1608									2	2	2	2	1	1	1	1
AT1G15340.1	| Symbols: MBD10 | methyl-CPG-binding domain 10 | chr1:5275895-5277474 REVERSE LENGTH=384																	1	1	1	1	1	1	1	1
AT1G15370.1	| Symbols: | SNARE-like superfamily protein | chr1:5287135-5288375 FORWARD LENGTH=147
AT1G15390.1	| Symbols: PDF1A, ATDEF1 | peptide deformylase 1A | chr1:5294653-5295625 FORWARD LENGTH=269																									7	7	7	7	6	6	6	6	5	8	8	8	2	2	2	2	4	4	4	4	1	1	1	1
AT1G15420.1	| Symbols: | CONTAINS InterPro DOMAIN/s: Small-subunit processome, Utp12 (InterPro:IPR007148); Has 764 Blast hits to 656 proteins in 193 species: Archae - 0; Bacteria - 42; Metazoa - 237; Fungi - 154; Plants - 85; Viruses - 23; Other Eukaryotes - 2									1	1	1	1
AT1G15440.1	| Symbols: PWP2, ATPWP2 | periodic tryptophan protein 2 | chr1:5306159-5309460 REVERSE LENGTH=900									3	3	3	3
AT1G15470.1	| Symbols: | Transducin/WD40 repeat-like superfamily protein | chr1:5315838-5317696 FORWARD LENGTH=333									1	1	0	0.2									1	1	0	0.2									1	1	0	0.2	1	1	0	0.2	1	1	0	0.2	1	2	0	0.4
AT1G15480.1	| Symbols: | Tetratricopeptide repeat (TPR)-like superfamily protein | chr1:5318307-5320422 FORWARD LENGTH=594					2	2	2	2
AT1G15500.1	| Symbols: ATNTT2 | TLC ATP/ADP transporter | chr1:5326426-5328688 FORWARD LENGTH=618					2	2	1	1.33	3	3	1	1.67
AT1G15690.1	| Symbols: AVP1, ATAVP3, AVP-3, AtVHP1;1 | Inorganic H pyrophosphatase family protein | chr1:5399115-5402185 FORWARD LENGTH=770					8	9	9	9	4	4	4	4									2	2	2	2
AT1G15710.1	| Symbols: | prephenate dehydrogenase family protein | chr1:5404505-5405581 FORWARD LENGTH=358
AT1G15730.1	| Symbols: | Cobalamin biosynthesis CobW-like protein | chr1:5407535-5409937 REVERSE LENGTH=448
AT1G15750.3	| Symbols: WSIP1, TPL | Transducin family protein / WD-40 repeat family protein | chr1:5415086-5420359 REVERSE LENGTH=1131	5	5	1	2.19	1	1	0	0.25	5	5	0	1.53	48	64	19	37.48	34	39	12	23.28	45	59	17	35.38	37	44	6	21.39	23	28	5	14.12	16	19	3	8.78					6	6	0	2.02	2	2	0	0.55
AT1G15790.1	| Symbols: | unknown protein; BEST Arabidopsis thaliana protein match is: unknown protein (TAIR:AT1G15780.1); Has 170 Blast hits to 94 proteins in 14 species: Archae - 0; Bacteria - 0; Metazoa - 0; Fungi - 0; Plants - 170; Viruses - 0; Other Eukary													5	8	8	8	5	6	6	6	5	7	7	7					1	1	1	1	1	1	1	1					1	1	1	1
AT1G15810.1	| Symbols: | S15/NS1, RNA-binding protein | chr1:5444496-5446271 FORWARD LENGTH=419									1	1	1	1
AT1G15820.1	| Symbols: LHCB6, CP24 | light harvesting complex photosystem II subunit 6 | chr1:5446685-5447676 REVERSE LENGTH=258									1	1	1	1
AT1G15860.2	| Symbols: | Domain of unknown function (DUF298) | chr1:5455055-5456741 FORWARD LENGTH=227
AT1G15870.1	| Symbols: | Mitochondrial glycoprotein family protein | chr1:5457153-5458245 FORWARD LENGTH=242
AT1G15910.1	| Symbols: | XH/XS domain-containing protein | chr1:5465951-5468723 FORWARD LENGTH=634
AT1G15930.2	| Symbols: | Ribosomal protein L7Ae/L30e/S12e/Gadd45 family protein | chr1:5471702-5472741 FORWARD LENGTH=144					5	7	6	6.47	6	9	8	8.47	2	2	1	1.47	3	3	2	2.47	3	3	2	2.47	5	5	4	4.47	4	6	5	5.47	4	4	3	3.47	7	9	8	8.47	6	9	8	8.47	2	4	3	3.47
AT1G15950.1	| Symbols: CCR1, IRX4, ATCCR1 | cinnamoyl coa reductase 1 | chr1:5478855-5481915 FORWARD LENGTH=344																									4	4	4	4	5	6	6	6	8	9	9	9	5	6	6	6	8	11	11	11	5	5	5	5
AT1G15980.1	| Symbols: NDF1, NDH48 | NDH-dependent cyclic electron flow 1 | chr1:5489314-5491199 FORWARD LENGTH=461
AT1G16030.1	| Symbols: Hsp70b | heat shock protein 70B | chr1:5502386-5504326 REVERSE LENGTH=646					4	5	0	0.04	7	13	0	0.22									5	5	0	0.08													2	2	0	0.02	2	4	0	0.03	2	3	0	0.03
AT1G16080.1	| Symbols: | unknown protein; LOCATED IN: apoplast, chloroplast stroma, chloroplast, chloroplast envelope; EXPRESSED IN: 23 plant structures; EXPRESSED DURING: 14 growth stages; Has 81 Blast hits to 81 proteins in 28 species: Archae - 0; Bacteria -																																													5	6	6	6
AT1G16190.1	| Symbols: RAD23A | Rad23 UV excision repair protein family | chr1:5543267-5545892 FORWARD LENGTH=368	5	7	3	5.67	2	3	0	2					2	3	2	2.67
AT1G16210.1	| Symbols: | unknown protein; CONTAINS InterPro DOMAIN/s: Protein of unknown function DUF1014 (InterPro:IPR010422); Has 16107 Blast hits to 8386 proteins in 1107 species: Archae - 26; Bacteria - 3370; Metazoa - 4013; Fungi - 1516; Plants - 526; Vir	2	2	2	2	1	1	1	1	1	1	1	1	4	4	4	4	6	9	9	9	2	2	2	2					3	3	3	3									2	2	2	2	1	1	1	1
AT1G16270.2	| Symbols: | Protein kinase superfamily protein with octicosapeptide/Phox/Bem1p domain | chr1:5563890-5568145 FORWARD LENGTH=1147																					1	1	0	0.03
AT1G16300.1	| Symbols: GAPCP-2 | glyceraldehyde-3-phosphate dehydrogenase of plastid 2 | chr1:5574433-5577406 FORWARD LENGTH=420					4	4	0	1.85	8	9	3	5.77									2	2	0	0.92													2	2	0	0.92	2	2	0	0.92	3	3	1	1.92
AT1G16340.2	| Symbols: ATKDSA2, ATKSDA | Aldolase superfamily protein | chr1:5588123-5590469 REVERSE LENGTH=291																																	1	1	0	0.33	1	1	0	0.33	2	2	0	0.67	3	4	0	1.33
AT1G16350.1	| Symbols: | Aldolase-type TIM barrel family protein | chr1:5590951-5592872 FORWARD LENGTH=502									3	3	1	2.1
AT1G16445.1	| Symbols: | S-adenosyl-L-methionine-dependent methyltransferases superfamily protein | chr1:5617811-5619303 FORWARD LENGTH=274													1	1	1	1
AT1G16460.4	| Symbols: RDH2 | rhodanese homologue 2 | chr1:5619848-5621981 REVERSE LENGTH=318									2	2	1	1.21																					1	1	0	0.21	1	1	0	0.21	1	1	1	1	1	1	0	0.21
AT1G16470.2	| Symbols: PAB1 | proteasome subunit PAB1 | chr1:5623122-5625439 FORWARD LENGTH=235
AT1G16540.1	| Symbols: SIR3, LOS5, ABA3, ATABA3, ACI2 | molybdenum cofactor sulfurase (LOS5) (ABA3) | chr1:5659465-5665201 FORWARD LENGTH=819													1	1	1	1
AT1G16610.3	| Symbols: SR45 | arginine/serine-rich 45 | chr1:5675925-5678686 REVERSE LENGTH=425					1	1	1	1	1	1	1	1																									1	1	1	1
AT1G16640.1	| Symbols: | AP2/B3-like transcriptional factor family protein | chr1:5686763-5687533 FORWARD LENGTH=134
AT1G16710.1	| Symbols: HAC12 | histone acetyltransferase of the CBP family 12 | chr1:5714692-5721782 FORWARD LENGTH=1706									1	1	1	1
AT1G16720.1	| Symbols: HCF173 | high chlorophyll fluorescence phenotype 173 | chr1:5723161-5726248 FORWARD LENGTH=598
AT1G16770.2	| Symbols: | unknown protein; FUNCTIONS IN: molecular_function unknown; INVOLVED IN: biological_process unknown; LOCATED IN: cellular_component unknown; Has 103 Blast hits to 103 proteins in 50 species: Archae - 0; Bacteria - 4; Metazoa - 0; Fungi
AT1G16800.1	| Symbols: | P-loop containing nucleoside triphosphate hydrolases superfamily protein | chr1:5745523-5755263 REVERSE LENGTH=2127
AT1G16810.2	| Symbols: | unknown protein; CONTAINS InterPro DOMAIN/s: Protein of unknown function DUF1754, eukaryotic (InterPro:IPR013865); Has 35333 Blast hits to 34131 proteins in 2444 species: Archae - 798; Bacteria - 22429; Metazoa - 974; Fungi - 991; Plan
AT1G16870.1	| Symbols: | mitochondrial 28S ribosomal protein S29-related | chr1:5770964-5773157 REVERSE LENGTH=480					2	3	3	3	7	10	10	10
AT1G16880.1	| Symbols: | uridylyltransferase-related | chr1:5773796-5776125 FORWARD LENGTH=290
AT1G16890.2	| Symbols: UBC36, UBC13B | ubiquitin-conjugating enzyme 36 | chr1:5776550-5778327 REVERSE LENGTH=153					1	1	1	1	2	2	1	1.5	12	27	9	18	10	22	10	16	14	27	9	18	8	12	6	9	5	8	4	6	8	9	3	6	2	3	3	3	2	2	2	2
AT1G16920.1	| Symbols: RAB11, ATRABA1B, RABA1b | RAB GTPase homolog A1B | chr1:5787489-5789147 REVERSE LENGTH=216					4	4	1	1.89	4	4	0	1.64	1	1	0	0.09	1	1	0	0.09					1	1	0	0.09	1	1	0	0.09	1	1	0	0.09	2	2	1	1.09
AT1G16970.1	| Symbols: KU70, ATKU70 | KU70 homolog | chr1:5801159-5805724 REVERSE LENGTH=621									3	3	3	3
AT1G17020.1	| Symbols: SRG1, ATSRG1 | senescence-related gene 1 | chr1:5820258-5821741 FORWARD LENGTH=358																																													5	5	5	5
AT1G17050.1	| Symbols: SPS2 | solanesyl diphosphate synthase 2 | chr1:5829289-5831215 FORWARD LENGTH=417
AT1G17070.1	| Symbols: | GC-rich sequence DNA-binding factor-like protein with Tuftelin interacting domain | chr1:5837653-5840202 FORWARD LENGTH=849
AT1G17100.1	| Symbols: | SOUL heme-binding family protein | chr1:5844766-5845539 FORWARD LENGTH=232									1	1	1	1
AT1G17130.1	| Symbols: | Family of unknown function (DUF572) | chr1:5854264-5856472 FORWARD LENGTH=331
AT1G17140.2	| Symbols: ICR1, RIP1 | interactor of constitutive active rops 1 | chr1:5856740-5857861 REVERSE LENGTH=344
AT1G17160.1	| Symbols: | pfkB-like carbohydrate kinase family protein | chr1:5867678-5869215 FORWARD LENGTH=379
AT1G17170.1	| Symbols: ATGSTU24, GST, GSTU24 | glutathione S-transferase TAU 24 | chr1:5869895-5870691 FORWARD LENGTH=218																					1	1	0	0.26	1	2	0	0.51	1	1	0	0.26	2	2	0	0.51	5	6	4	4.51	5	7	2	3.21	9	10	8	8.51
AT1G17180.1	| Symbols: ATGSTU25, GSTU25 | glutathione S-transferase TAU 25 | chr1:5872208-5872958 FORWARD LENGTH=221
AT1G17190.1	| Symbols: ATGSTU26, GSTU26 | glutathione S-transferase tau 26 | chr1:5875452-5876375 FORWARD LENGTH=220																																					1	2	2	2	3	3	2	2.14	2	3	3	3
AT1G17210.1	| Symbols: ATILP1, ILP1 | IAP-like protein 1 | chr1:5880502-5884657 REVERSE LENGTH=958
AT1G17220.1	| Symbols: FUG1 | Translation initiation factor 2, small GTP-binding protein | chr1:5885383-5890165 FORWARD LENGTH=1026
AT1G17290.1	| Symbols: AlaAT1 | alanine aminotransferas | chr1:5922771-5926093 FORWARD LENGTH=543
AT1G17330.1	| Symbols: | Metal-dependent phosphohydrolase | chr1:5929966-5931595 FORWARD LENGTH=222
AT1G17360.1	| Symbols: | BEST Arabidopsis thaliana protein match is: COP1-interacting protein-related (TAIR:AT1G72410.1); Has 9949 Blast hits to 7480 proteins in 576 species: Archae - 12; Bacteria - 1007; Metazoa - 3636; Fungi - 982; Plants - 444; Viruses - 50
AT1G17370.1	| Symbols: UBP1B | oligouridylate binding protein 1B | chr1:5951842-5954825 REVERSE LENGTH=419					1	1	0	0.18	1	1	0	0.18	1	1	0	0.18	1	1	0	0.18	1	1	0	0.18	1	1	0	0.18	1	1	0	0.18	1	1	0	0.18	3	3	1	1.35	2	2	1	1.18	4	4	2	2.35
AT1G17420.1	| Symbols: LOX3 | lipoxygenase 3 | chr1:5977512-5981384 FORWARD LENGTH=919
AT1G17450.2	| Symbols: | B-block binding subunit of TFIIIC | chr1:5988579-5996693 REVERSE LENGTH=1844
AT1G17470.2	| Symbols: ATDRG1, ATDRG, DRG1 | developmentally regulated G-protein 1 | chr1:6003442-6006155 FORWARD LENGTH=399					3	5	5	5	2	3	3	3	1	1	1	1
AT1G17510.1	| Symbols: | unknown protein; Has 11 Blast hits to 11 proteins in 4 species: Archae - 0; Bacteria - 0; Metazoa - 0; Fungi - 0; Plants - 11; Viruses - 0; Other Eukaryotes - 0 (source: NCBI BLink). | chr1:6023704-6024211 REVERSE LENGTH=122									1	1	1	1
AT1G17520.1	| Symbols: | Homeodomain-like/winged-helix DNA-binding family protein | chr1:6024959-6027224 REVERSE LENGTH=296									1	1	1	1									1	1	1	1	1	1	1	1									1	1	1	1					1	1	1	1
AT1G17650.1	| Symbols: GLYR2, GR2 | glyoxylate reductase 2 | chr1:6069594-6071964 REVERSE LENGTH=358																																					1	1	1	1					1	1	1	1
AT1G17690.1	| Symbols: NOF1 | FUNCTIONS IN: molecular_function unknown; INVOLVED IN: biological_process unknown; LOCATED IN: nucleus; EXPRESSED IN: 24 plant structures; EXPRESSED DURING: 13 growth stages; CONTAINS InterPro DOMAIN/s: Digestive organ expansion fa
AT1G17720.1	| Symbols: ATB BETA | Protein phosphatase 2A, regulatory subunit PR55 | chr1:6093949-6098065 REVERSE LENGTH=501
AT1G17720.2	| Symbols: ATB BETA | Protein phosphatase 2A, regulatory subunit PR55 | chr1:6093949-6098065 REVERSE LENGTH=500
AT1G17745.2	| Symbols: PGDH | D-3-phosphoglycerate dehydrogenase | chr1:6101157-6104979 FORWARD LENGTH=651					1	1	0	0.47	2	2	1	1.47	1	1	0	0.47					1	1	0	0.47													2	2	1	1.47	2	2	1	1.47
AT1G17860.1	| Symbols: | Kunitz family trypsin and protease inhibitor protein | chr1:6149343-6149933 FORWARD LENGTH=196	6	6	6	6					1	1	1	1	6	9	9	9	6	8	8	8	6	7	7	7	7	8	8	8	5	6	6	6	4	5	5	5
AT1G17880.1	| Symbols: BTF3, ATBTF3 | basic transcription factor 3 | chr1:6152572-6153425 REVERSE LENGTH=165					7	7	6	6.58	7	12	12	12
AT1G17890.1	| Symbols: GER2 | NAD(P)-binding Rossmann-fold superfamily protein | chr1:6154478-6155596 REVERSE LENGTH=328																					2	2	2	2	6	8	6	7.3	6	9	8	8.65	14	24	22	23.3	18	22	17	20.25	12	20	16	18.6	12	16	14	15.3
AT1G17930.1	| Symbols: | Aminotransferase-like, plant mobile domain family protein | chr1:6166638-6168432 REVERSE LENGTH=478
AT1G17980.1	| Symbols: PAPS1 | poly(A) polymerase 1 | chr1:6187742-6191418 REVERSE LENGTH=713																																									2	2	2	2	1	1	1	1
AT1G18040.1	| Symbols: CDKD1;3, AT;CDCKD;3, CAK2AT | cyclin-dependent kinase D1;3 | chr1:6207128-6209299 REVERSE LENGTH=391
AT1G18070.2	| Symbols: | Translation elongation factor EF1A/initiation factor IF2gamma family protein | chr1:6214236-6218211 REVERSE LENGTH=532									1	1	1	1																									3	3	3	3	6	7	7	7	6	6	6	6
AT1G18080.1	| Symbols: ATARCA, RACK1A_AT, RACK1A | Transducin/WD40 repeat-like superfamily protein | chr1:6222325-6223901 FORWARD LENGTH=327	16	21	19	20.21	18	35	30	33.03	19	45	40	43.03	22	123	92	116.38	18	50	43	47.24	18	55	49	52.63	20	66	60	63.63	18	46	41	44.03	19	58	53	56.03	18	24	22	23.21	15	32	30	31.21	15	31	28	29.82
AT1G18150.2	| Symbols: ATMPK8 | Protein kinase superfamily protein | chr1:6244641-6247582 REVERSE LENGTH=589
AT1G18180.1	| Symbols: | Protein of unknown function (DUF1295) | chr1:6255903-6257737 FORWARD LENGTH=305					1	1	1	1	1	1	1	1
AT1G18190.1	| Symbols: GC2 | golgin candidate 2 | chr1:6257963-6261325 REVERSE LENGTH=668
AT1G18210.1	| Symbols: | Calcium-binding EF-hand family protein | chr1:6268273-6268785 REVERSE LENGTH=170					3	3	3	3	4	4	4	4									3	4	4	4	3	3	3	3	3	3	3	3	3	4	4	4	5	5	5	5	3	3	3	3	5	6	6	6
AT1G18250.1	| Symbols: ATLP-1 | Pathogenesis-related thaumatin superfamily protein | chr1:6277024-6278005 REVERSE LENGTH=243									2	2	2	2
AT1G18270.1	| Symbols: | ketose-bisphosphate aldolase class-II family protein | chr1:6283634-6293772 REVERSE LENGTH=1373					1	1	1	1	3	3	3	3
AT1G18335.1	| Symbols: | Acyl-CoA N-acyltransferases (NAT) superfamily protein | chr1:6309428-6311326 REVERSE LENGTH=269
AT1G18370.1	| Symbols: HIK, ATNACK1, NACK1 | ATP binding microtubule motor family protein | chr1:6319732-6323820 REVERSE LENGTH=974																																													1	1	1	1
AT1G18440.1	| Symbols: | Peptidyl-tRNA hydrolase family protein | chr1:6345994-6347686 FORWARD LENGTH=288													1	1	1	1
AT1G18450.1	| Symbols: ATARP4, ARP4 | actin-related protein 4 | chr1:6348199-6351766 FORWARD LENGTH=441					1	1	1	1	3	3	3	3									1	1	1	1
AT1G18490.1	| Symbols: | Protein of unknown function (DUF1637) | chr1:6367116-6368640 FORWARD LENGTH=282																																													2	5	5	5
AT1G18500.1	| Symbols: MAML-4, IPMS1 | methylthioalkylmalate synthase-like 4 | chr1:6369347-6372861 FORWARD LENGTH=631					2	2	1	1.47	5	6	2	3.89																									1	1	1	1	1	1	0	0.47
AT1G18520.1	| Symbols: TET11 | tetraspanin11 | chr1:6375051-6376178 FORWARD LENGTH=271
AT1G18540.1	| Symbols: | Ribosomal protein L6 family protein | chr1:6377448-6378548 REVERSE LENGTH=233					15	24	7	15.5	14	30	11	20.5									7	13	2	7.5					1	3	0	1.5
AT1G18550.1	| Symbols: | ATP binding microtubule motor family protein | chr1:6381656-6384340 REVERSE LENGTH=725
AT1G18560.1	| Symbols: | BED zinc finger ;hAT family dimerisation domain | chr1:6385614-6388005 FORWARD LENGTH=690
AT1G18590.1	| Symbols: SOT17, ATSOT17, ATST5C | sulfotransferase 17 | chr1:6398634-6399674 FORWARD LENGTH=346																																	4	4	3	3.27	2	2	1	1.27	1	2	2	2	1	1	0	0.27
AT1G18630.1	| Symbols: GR-RBP6 | glycine-rich RNA-binding protein 6 | chr1:6415226-6416283 FORWARD LENGTH=155					1	1	1	1	3	4	4	4
AT1G18640.2	| Symbols: PSP | 3-phosphoserine phosphatase | chr1:6416524-6418245 REVERSE LENGTH=295																									1	1	1	1	1	1	1	1	16	20	20	20	11	13	13	13	10	11	11	11	3	4	4	4
AT1G18700.4	| Symbols: | DNAJ heat shock N-terminal domain-containing protein | chr1:6437591-6443046 FORWARD LENGTH=715					1	1	1	1	1	1	1	1
AT1G18750.2	| Symbols: AGL65 | AGAMOUS-like 65 | chr1:6467404-6469698 FORWARD LENGTH=334																																													1	1	1	1
AT1G18800.1	| Symbols: NRP2 | NAP1-related protein 2 | chr1:6481466-6483463 REVERSE LENGTH=256
AT1G18850.1	| Symbols: | unknown protein; FUNCTIONS IN: molecular_function unknown; INVOLVED IN: biological_process unknown; LOCATED IN: nucleolus; EXPRESSED IN: 22 plant structures; EXPRESSED DURING: 13 growth stages; Has 40 Blast hits to 40 proteins in 13 sp					1	1	1	1	1	1	1	1
AT1G18980.1	| Symbols: | RmlC-like cupins superfamily protein | chr1:6557364-6558026 REVERSE LENGTH=220													1	1	1	1	2	2	2	2	2	2	2	2
AT1G19050.1	| Symbols: ARR7 | response regulator 7 | chr1:6577919-6579078 REVERSE LENGTH=206																																													1	1	1	1
AT1G19120.1	| Symbols: | Small nuclear ribonucleoprotein family protein | chr1:6608288-6609162 FORWARD LENGTH=128
AT1G19130.1	| Symbols: | CONTAINS InterPro DOMAIN/s: Protein of unknown function DUF985 (InterPro:IPR009327), RmlC-like jelly roll fold (InterPro:IPR014710); Has 1465 Blast hits to 1465 proteins in 584 species: Archae - 10; Bacteria - 1038; Metazoa - 19; Fungi																																	3	3	3	3	10	18	18	18	10	24	24	24	10	19	19	19
AT1G19140.1	| Symbols: | FUNCTIONS IN: molecular_function unknown; INVOLVED IN: ubiquinone biosynthetic process; LOCATED IN: mitochondrion; EXPRESSED IN: 24 plant structures; EXPRESSED DURING: 15 growth stages; CONTAINS InterPro DOMAIN/s: COQ9 (InterPro:IPR013																					1	1	1	1	9	10	10	10	2	3	3	3	10	14	14	14	8	9	9	9	4	4	4	4	5	7	7	7
AT1G19320.1	| Symbols: | Pathogenesis-related thaumatin superfamily protein | chr1:6679327-6680178 FORWARD LENGTH=247	1	1	1	1
AT1G19490.1	| Symbols: | Basic-leucine zipper (bZIP) transcription factor family protein | chr1:6751953-6753959 REVERSE LENGTH=471																																									1	1	1	1
AT1G19520.1	| Symbols: NFD5 | pentatricopeptide (PPR) repeat-containing protein | chr1:6760032-6762581 FORWARD LENGTH=725					1	1	1	1	3	3	3	3
AT1G19570.1	| Symbols: DHAR1, ATDHAR1, DHAR5 | dehydroascorbate reductase | chr1:6773462-6774413 REVERSE LENGTH=213
AT1G19580.2	| Symbols: GAMMA CA1 | gamma carbonic anhydrase 1 | chr1:6774937-6776845 FORWARD LENGTH=220					4	4	1	1.2	2	2	1	1.07
AT1G19600.1	| Symbols: | pfkB-like carbohydrate kinase family protein | chr1:6779085-6780898 FORWARD LENGTH=355
AT1G19670.1	| Symbols: ATCLH1, CORI1, ATHCOR1, CLH1 | chlorophyllase 1 | chr1:6803796-6804923 REVERSE LENGTH=324					2	2	2	2
AT1G19730.1	| Symbols: ATTRX4, ATH4 | Thioredoxin superfamily protein | chr1:6823163-6824020 REVERSE LENGTH=119													4	4	4	4	4	4	4	4	8	9	9	9	6	7	7	7	8	9	9	9	1	1	1	1
AT1G19740.1	| Symbols: | ATP-dependent protease La (LON) domain protein | chr1:6824396-6825232 FORWARD LENGTH=278
AT1G19860.1	| Symbols: | Zinc finger C-x8-C-x5-C-x3-H type family protein | chr1:6891654-6894400 REVERSE LENGTH=413
AT1G19870.1	| Symbols: iqd32 | IQ-domain 32 | chr1:6895400-6898539 REVERSE LENGTH=794
AT1G19880.1	| Symbols: | Regulator of chromosome condensation (RCC1) family protein | chr1:6900648-6903818 REVERSE LENGTH=538
AT1G19920.1	| Symbols: APS2, ASA1 | Pseudouridine synthase/archaeosine transglycosylase-like family protein | chr1:6914835-6916657 REVERSE LENGTH=476					1	1	0	0.47	1	1	0	0.47									1	1	0	0.47
AT1G20010.1	| Symbols: TUB5 | tubulin beta-5 chain | chr1:6938033-6940481 REVERSE LENGTH=449	4	4	0	0.27	14	23	0	1.9									1	1	0	0.07	13	17	0	1.46					2	2	0	0.13	3	3	0	0.2									3	3	0	0.2
AT1G20020.1	| Symbols: ATLFNR2, FNR2 | ferredoxin-NADP(+)-oxidoreductase 2 | chr1:6942851-6944868 FORWARD LENGTH=369					1	1	1	1	1	1	1	1																					5	6	6	6	19	30	28	28.95	19	30	27	28.43	17	30	28	28.95
AT1G20050.1	| Symbols: HYD1 | C-8,7 sterol isomerase | chr1:6949160-6950135 FORWARD LENGTH=223									2	2	2	2
AT1G20080.1	| Symbols: SYTB, ATSYTB, NTMC2TYPE1.2, NTMC2T1.2, SYT2 | Calcium-dependent lipid-binding (CaLB domain) family protein | chr1:6962236-6964912 FORWARD LENGTH=537									1	1	1	1
AT1G20110.1	| Symbols: | RING/FYVE/PHD zinc finger superfamily protein | chr1:6971554-6974578 FORWARD LENGTH=601																	2	2	2	2	5	5	5	5	2	2	2	2	3	3	3	3	6	6	6	6	2	2	2	2	3	3	3	3	1	1	1	1
AT1G20140.1	| Symbols: ASK4, SK4 | SKP1-like 4 | chr1:6986430-6987079 FORWARD LENGTH=163
AT1G20200.1	| Symbols: EMB2719, HAP15 | PAM domain (PCI/PINT associated module) protein | chr1:7001409-7004154 REVERSE LENGTH=488					9	9	4	7.18	16	20	13	17.45									8	9	3	6.82
AT1G20220.1	| Symbols: | Alba DNA/RNA-binding protein | chr1:7005090-7007285 REVERSE LENGTH=315					2	2	2	2	6	6	5	5.53									1	1	1	1
AT1G20225.1	| Symbols: | Thioredoxin superfamily protein | chr1:7007966-7009318 REVERSE LENGTH=233	1	1	1	1																					1	1	1	1									1	1	1	1	3	4	4	4	4	7	7	7
AT1G20330.1	| Symbols: SMT2, CVP1, FRL1 | sterol methyltransferase 2 | chr1:7038968-7040053 REVERSE LENGTH=361					2	2	2	2	4	4	4	4
AT1G20340.1	| Symbols: DRT112, PETE2 | Cupredoxin superfamily protein | chr1:7042770-7043273 REVERSE LENGTH=167
AT1G20360.1	| Symbols: | F-box family protein | chr1:7046767-7047675 REVERSE LENGTH=302
AT1G20370.1	| Symbols: | Pseudouridine synthase family protein | chr1:7051846-7053588 REVERSE LENGTH=549									1	1	1	1
AT1G20410.1	| Symbols: | Pseudouridine synthase family protein | chr1:7079049-7082504 REVERSE LENGTH=504
AT1G20430.1	| Symbols: | unknown protein; Has 29 Blast hits to 29 proteins in 10 species: Archae - 0; Bacteria - 0; Metazoa - 0; Fungi - 0; Plants - 29; Viruses - 0; Other Eukaryotes - 0 (source: NCBI BLink). | chr1:7083471-7083821 REVERSE LENGTH=116					1	1	1	1	1	1	1	1
AT1G20440.1	| Symbols: COR47, RD17, AtCOR47 | cold-regulated 47 | chr1:7084722-7085664 REVERSE LENGTH=265					1	1	0	0.45	1	1	0	0.45									1	1	0	0.45	1	1	0	0.45	1	1	0	0.45	1	1	0	0.45	1	1	0	0.45	1	1	0	0.45	1	1	0	0.45
AT1G20450.2	| Symbols: LTI29, LTI45, ERD10 | Dehydrin family protein | chr1:7088235-7089107 REVERSE LENGTH=259
AT1G20510.1	| Symbols: OPCL1 | OPC-8:0 CoA ligase1 | chr1:7103645-7105856 REVERSE LENGTH=546													3	4	4	4	1	1	1	1	2	3	3	3									1	1	1	1
AT1G20540.1	| Symbols: | Transducin/WD40 repeat-like superfamily protein | chr1:7112652-7115191 FORWARD LENGTH=351
AT1G20550.1	| Symbols: | O-fucosyltransferase family protein | chr1:7115485-7117936 REVERSE LENGTH=564
AT1G20575.1	| Symbols: | Nucleotide-diphospho-sugar transferases superfamily protein | chr1:7126987-7128677 REVERSE LENGTH=246					1	1	1	1
AT1G20580.1	| Symbols: | Small nuclear ribonucleoprotein family protein | chr1:7128979-7130371 FORWARD LENGTH=131					3	3	2	2.56	4	5	3	4.11									1	1	1	1													1	1	1	1
AT1G20620.1	| Symbols: CAT3, SEN2, ATCAT3 | catalase 3 | chr1:7143142-7146193 FORWARD LENGTH=492	20	26	16	20.8	15	23	13	17.8	6	7	4	5.42	17	27	17	22.14	13	18	9	13.44	13	29	15	22.1	7	10	5	7.49	5	6	3	4.42	3	4	2	2.89	1	1	0	0.53	2	2	1	1.36	2	2	0	0.89
AT1G20630.1	| Symbols: CAT1 | catalase 1 | chr1:7146812-7149609 FORWARD LENGTH=492	20	28	19	22.83	12	19	10	13.83	6	8	4	5.76	16	31	22	26.16	14	21	13	16.51	19	39	25	31.39	10	13	9	10.79	6	9	7	7.82	5	5	3	3.82	3	3	2	2.5	5	6	4	4.82	2	2	1	1.32
AT1G20693.2	| Symbols: HMGB2, HMG BETA 1, NFD2, NFD02 | high mobility group B2 | chr1:7177282-7178487 FORWARD LENGTH=142
AT1G20696.2	| Symbols: HMGB3, NFD3, NFD03 | high mobility group B3 | chr1:7179825-7181193 FORWARD LENGTH=147
AT1G20760.1	| Symbols: | Calcium-binding EF hand family protein | chr1:7209515-7214773 FORWARD LENGTH=1019	6	6	6	6	4	5	5	5	1	1	1	1					1	1	1	1
AT1G20800.2	| Symbols: | F-box family protein | chr1:7228718-7230240 REVERSE LENGTH=479
AT1G20810.1	| Symbols: | FKBP-like peptidyl-prolyl cis-trans isomerase family protein | chr1:7232025-7233367 FORWARD LENGTH=232													4	4	4	4	2	2	2	2	2	2	2	2
AT1G20920.1	| Symbols: | P-loop containing nucleoside triphosphate hydrolases superfamily protein | chr1:7285342-7288842 FORWARD LENGTH=1166
AT1G20950.1	| Symbols: | Phosphofructokinase family protein | chr1:7297467-7301336 REVERSE LENGTH=614					1	2	2	2	9	9	7	8									3	3	3	3	10	11	8	9.5	7	7	6	6.5	15	20	10	15	31	38	24	31	32	39	24	31.5	25	30	15	22.5
AT1G20960.1	| Symbols: emb1507 | U5 small nuclear ribonucleoprotein helicase, putative | chr1:7302591-7309914 REVERSE LENGTH=2171					10	11	11	11	29	32	32	32									2	2	2	2
AT1G20970.1	| Symbols: | FUNCTIONS IN: molecular_function unknown; INVOLVED IN: biological_process unknown; LOCATED IN: plasma membrane, vacuole; EXPRESSED IN: guard cell, cultured cell; BEST Arabidopsis thaliana protein match is: proton pump interactor 1 (TAI
AT1G21060.1	| Symbols: | Protein of unknown function, DUF547 | chr1:7371799-7374085 FORWARD LENGTH=505					1	1	1	1
AT1G21065.1	| Symbols: | unknown protein; INVOLVED IN: biological_process unknown; LOCATED IN: chloroplast; EXPRESSED IN: 22 plant structures; EXPRESSED DURING: 13 growth stages; CONTAINS InterPro DOMAIN/s: Uncharacterised protein family UPF0047 (InterPro:IPR0													7	7	7	7	3	3	3	3	4	4	4	4	4	4	4	4	1	1	1	1	3	3	3	3	1	1	1	1
AT1G21070.1	| Symbols: | Nucleotide-sugar transporter family protein | chr1:7376148-7377810 REVERSE LENGTH=348
AT1G21080.3	| Symbols: | DNAJ heat shock N-terminal domain-containing protein | chr1:7378822-7382275 REVERSE LENGTH=400					1	1	1	1
AT1G21190.1	| Symbols: | Small nuclear ribonucleoprotein family protein | chr1:7419989-7420856 REVERSE LENGTH=97
AT1G21350.2	| Symbols: | Thioredoxin superfamily protein | chr1:7477376-7479012 REVERSE LENGTH=225																									4	4	4	4	1	1	1	1	2	2	2	2	3	3	3	3	4	5	5	5	3	4	4	4
AT1G21380.1	| Symbols: | Target of Myb protein 1 | chr1:7485806-7488032 REVERSE LENGTH=506
AT1G21440.1	| Symbols: | Phosphoenolpyruvate carboxylase family protein | chr1:7502325-7504103 REVERSE LENGTH=336									2	2	2	2																									2	2	2	2	3	3	3	3	5	7	7	7
AT1G21450.1	| Symbols: SCL1 | SCARECROW-like 1 | chr1:7509721-7511502 FORWARD LENGTH=593
AT1G21600.2	| Symbols: PTAC6 | plastid transcriptionally active 6 | chr1:7571514-7573782 REVERSE LENGTH=328
AT1G21610.3	| Symbols: | wound-responsive family protein | chr1:7574104-7578643 FORWARD LENGTH=685																					1	1	1	1
AT1G21630.1	| Symbols: | Calcium-binding EF hand family protein | chr1:7581457-7587796 FORWARD LENGTH=1218	5	5	5	5	1	1	1	1					3	3	3	3	2	2	2	2	5	5	5	5
AT1G21660.1	| Symbols: | Chaperone DnaJ-domain superfamily protein | chr1:7605924-7608835 FORWARD LENGTH=523					1	1	1	1									1	1	1	1	1	1	1	1													2	2	2	2	2	2	2	2
AT1G21670.1	| Symbols: | LOCATED IN: cell wall, plant-type cell wall; EXPRESSED IN: 23 plant structures; EXPRESSED DURING: 14 growth stages; CONTAINS InterPro DOMAIN/s: WD40-like Beta Propeller (InterPro:IPR011659), Six-bladed beta-propeller, TolB-like (InterP	21	24	23	23.68	1	1	1	1					22	29	29	29	14	16	16	16	21	25	25	25
AT1G21680.1	| Symbols: | DPP6 N-terminal domain-like protein | chr1:7613028-7615148 FORWARD LENGTH=706	1	1	0	0.32																																									1	1	1	1
AT1G21690.3	| Symbols: EMB1968 | ATPase family associated with various cellular activities (AAA) | chr1:7615675-7618421 FORWARD LENGTH=341									1	1	1	1
AT1G21700.1	| Symbols: ATSWI3C, CHB4, SWI3C | SWITCH/sucrose nonfermenting 3C | chr1:7620156-7623978 REVERSE LENGTH=807
AT1G21720.1	| Symbols: PBC1 | proteasome beta subunit C1 | chr1:7626394-7628070 FORWARD LENGTH=204					1	1	1	1	2	2	2	2																	3	3	1	2.09
AT1G21750.1	| Symbols: ATPDIL1-1, ATPDI5, PDI5, PDIL1-1 | PDI-like 1-1 | chr1:7645767-7648514 FORWARD LENGTH=501					3	3	3	3	3	3	3	3
AT1G21770.1	| Symbols: | Acyl-CoA N-acyltransferases (NAT) superfamily protein | chr1:7651843-7652249 REVERSE LENGTH=111													2	3	3	3	1	1	1	1	1	1	1	1	2	3	3	3	2	5	5	5	2	2	2	2	1	1	1	1	1	1	1	1	1	1	1	1
AT1G21810.1	| Symbols: | Plant protein of unknown function (DUF869) | chr1:7656578-7658634 REVERSE LENGTH=628
AT1G21880.1	| Symbols: LYM1 | lysm domain GPI-anchored protein 1 precursor | chr1:7680689-7682048 FORWARD LENGTH=316																																					2	2	1	1.5	2	2	1	1.5	2	2	1	1.5
AT1G22060.1	| Symbols: | LOCATED IN: vacuole; EXPRESSED IN: 23 plant structures; EXPRESSED DURING: 13 growth stages; BEST Arabidopsis thaliana protein match is: FBD, F-box and Leucine Rich Repeat domains containing protein (TAIR:AT1G22000.1); Has 84739 Blast h									4	4	4	4
AT1G22170.1	| Symbols: | Phosphoglycerate mutase family protein | chr1:7826603-7828055 FORWARD LENGTH=334									1	1	1	1
AT1G22270.1	| Symbols: | Trm112p-like protein | chr1:7865548-7865922 FORWARD LENGTH=124
AT1G22275.1	| Symbols: ZYP1b, ZYP1 | Myosin heavy chain-related protein | chr1:7867245-7872066 FORWARD LENGTH=856
AT1G22280.3	| Symbols: PAPP2C | phytochrome-associated protein phosphatase type 2C | chr1:7874236-7875496 FORWARD LENGTH=287													1	1	1	1
AT1G22290.1	| Symbols: | 14-3-3 family protein | chr1:7876966-7877915 REVERSE LENGTH=196
AT1G22300.2	| Symbols: GRF10, GF14 EPSILON | general regulatory factor 10 | chr1:7879244-7881103 REVERSE LENGTH=254	2	2	0	0.34	1	1	0	0.17	1	1	0	0.17
AT1G22360.2	| Symbols: AtUGT85A2, UGT85A2 | UDP-glucosyl transferase 85A2 | chr1:7895068-7897527 REVERSE LENGTH=469
AT1G22410.1	| Symbols: | Class-II DAHP synthetase family protein | chr1:7912120-7914742 FORWARD LENGTH=527	2	3	0	1.03	4	4	2	2.69	5	6	4	4.69	2	3	0	1.03	2	3	2	2.34	2	2	2	2	2	2	1	1.34	2	2	1	1.34	1	1	0	0.34	5	6	3	3.87	5	5	3	3.69	1	1	0	0.19
AT1G22430.2	| Symbols: | GroES-like zinc-binding dehydrogenase family protein | chr1:7919235-7921594 FORWARD LENGTH=388																																													1	1	1	1
AT1G22440.1	| Symbols: | Zinc-binding alcohol dehydrogenase family protein | chr1:7922560-7924759 FORWARD LENGTH=386
AT1G22450.1	| Symbols: COX6B, ATCOX6B2 | cytochrome C oxidase 6B | chr1:7925447-7926918 FORWARD LENGTH=191					1	1	1	1
AT1G22460.1	| Symbols: | O-fucosyltransferase family protein | chr1:7927530-7930351 REVERSE LENGTH=565
AT1G22470.1	| Symbols: | unknown protein; BEST Arabidopsis thaliana protein match is: unknown protein (TAIR:AT1G72240.1); Has 1693 Blast hits to 236 proteins in 54 species: Archae - 0; Bacteria - 8; Metazoa - 451; Fungi - 116; Plants - 94; Viruses - 2; Other E
AT1G22500.1	| Symbols: | RING/U-box superfamily protein | chr1:7949581-7950726 FORWARD LENGTH=381																					1	1	1	1
AT1G22510.2	| Symbols: | RING/U-box protein with domain of unknown function (DUF 1232) | chr1:7951003-7952593 REVERSE LENGTH=203					1	1	1	1	1	1	1	1
AT1G22530.1	| Symbols: PATL2 | PATELLIN 2 | chr1:7955773-7958326 REVERSE LENGTH=683
AT1G22610.1	| Symbols: | C2 calcium/lipid-binding plant phosphoribosyltransferase family protein | chr1:7994478-7997567 FORWARD LENGTH=1029																													1	1	1	1									1	1	1	1
AT1G22650.1	| Symbols: | Plant neutral invertase family protein | chr1:8013529-8015647 REVERSE LENGTH=534									1	1	0	0.1
AT1G22660.2	| Symbols: | Polynucleotide adenylyltransferase family protein | chr1:8017410-8021538 FORWARD LENGTH=603
AT1G22730.1	| Symbols: | MA3 domain-containing protein | chr1:8046511-8048769 FORWARD LENGTH=693
AT1G22750.4	| Symbols: | unknown protein; CONTAINS InterPro DOMAIN/s: Protein of unknown function DUF1475 (InterPro:IPR009943); Has 186 Blast hits to 155 proteins in 21 species: Archae - 0; Bacteria - 8; Metazoa - 3; Fungi - 0; Plants - 65; Viruses - 0; Other									1	1	1	1
AT1G22780.1	| Symbols: PFL, RPS18A, PFL1 | Ribosomal protein S13/S18 family | chr1:8067990-8069163 FORWARD LENGTH=152					9	15	15	15	10	26	26	26									5	6	6	6									1	1	1	1
AT1G22800.1	| Symbols: | S-adenosyl-L-methionine-dependent methyltransferases superfamily protein | chr1:8072020-8074039 FORWARD LENGTH=355
AT1G22840.1	| Symbols: CYTC-1, ATCYTC-A | CYTOCHROME C-1 | chr1:8079384-8080286 FORWARD LENGTH=114	4	5	3	4	2	2	1	1.5	1	1	1	1	6	11	7	9	5	11	6	8.5	4	7	3	5	2	3	2	2.5	3	3	2	2.5	2	2	1	1.5	1	1	1	1					1	1	1	1
AT1G22920.1	| Symbols: CSN5A, JAB1, AJH1 | COP9 signalosome 5A | chr1:8109882-8111895 REVERSE LENGTH=357
AT1G22940.1	| Symbols: TH1, TH-1, THIE | thiamin biosynthesis protein, putative | chr1:8122384-8124908 FORWARD LENGTH=522
AT1G22970.1	| Symbols: | unknown protein; BEST Arabidopsis thaliana protein match is: unknown protein (TAIR:AT1G71150.1); Has 134 Blast hits to 132 proteins in 48 species: Archae - 0; Bacteria - 0; Metazoa - 66; Fungi - 10; Plants - 48; Viruses - 0; Other Euka
AT1G23000.1	| Symbols: | Heavy metal transport/detoxification superfamily protein | chr1:8143614-8144865 FORWARD LENGTH=358
AT1G23030.1	| Symbols: | ARM repeat superfamily protein | chr1:8156745-8158842 FORWARD LENGTH=612													1	1	1	1
AT1G23100.1	| Symbols: | GroES-like family protein | chr1:8195867-8196336 FORWARD LENGTH=97													1	1	1	1	1	1	1	1	4	5	5	5	2	2	2	2	3	4	4	4	2	2	2	2					2	2	2	2	1	1	1	1
AT1G23140.1	| Symbols: | Calcium-dependent lipid-binding (CaLB domain) family protein | chr1:8202362-8203172 REVERSE LENGTH=165
AT1G23180.1	| Symbols: | ARM repeat superfamily protein | chr1:8216125-8219515 FORWARD LENGTH=834
AT1G23190.1	| Symbols: PGM3 | Phosphoglucomutase/phosphomannomutase family protein | chr1:8219946-8224186 FORWARD LENGTH=583					1	1	1	1	3	4	4	4	14	18	10	13.91	14	17	14	15.47	14	16	11	13.44	18	21	11	15.89	18	24	15	19.4	13	16	10	12.93	28	42	25	33.31	31	43	27	34.82	33	49	28	38.27
AT1G23230.2	| Symbols: | FUNCTIONS IN: molecular_function unknown; INVOLVED IN: response to salt stress; EXPRESSED IN: 24 plant structures; EXPRESSED DURING: 15 growth stages; CONTAINS InterPro DOMAIN/s: Mediator complex subunit Med23 (InterPro:IPR021629). | c
AT1G23260.1	| Symbols: MMZ1, UEV1A | MMS ZWEI homologue 1 | chr1:8257209-8258573 REVERSE LENGTH=158																					1	1	0	0.08	2	2	0	0.17	1	1	0	0.08	2	4	0	0.33	2	2	1	1.08	1	2	0	0.17	2	2	1	1.08
AT1G23280.1	| Symbols: | MAK16 protein-related | chr1:8260865-8262650 REVERSE LENGTH=303
AT1G23290.1	| Symbols: RPL27A, RPL27AB | Ribosomal protein L18e/L15 superfamily protein | chr1:8263007-8263447 FORWARD LENGTH=146					4	4	1	2.5	6	7	1	4									3	3	0	1.5
AT1G23310.1	| Symbols: GGT1, AOAT1, GGAT1 | glutamate:glyoxylate aminotransferase | chr1:8268720-8271329 REVERSE LENGTH=481									1	1	0	0.83					2	2	0	1.67	1	1	0	0.83	2	2	0	1.67	4	6	2	5.33	16	20	7	17.83	10	13	4	11.5	13	16	6	14.33	6	6	0	5
AT1G23440.1	| Symbols: | Peptidase C15, pyroglutamyl peptidase I-like | chr1:8321940-8324019 FORWARD LENGTH=217	1	1	1	1									11	12	11	11.52	11	12	11	11.52	10	12	10	11.04	5	5	5	5	5	5	4	4.52	2	2	2	2					1	1	1	1	1	1	1	1
AT1G23510.1	| Symbols: | unknown protein; BEST Arabidopsis thaliana protein match is: Domain of unknown function (DUF220) (TAIR:AT1G23520.1); Has 133 Blast hits to 120 proteins in 9 species: Archae - 0; Bacteria - 0; Metazoa - 0; Fungi - 0; Plants - 133; Virus
AT1G23640.1	| Symbols: | unknown protein; LOCATED IN: chloroplast; EXPRESSED IN: petal, leaf whorl, sepal, flower; EXPRESSED DURING: 4 anthesis, petal differentiation and expansion stage; CONTAINS InterPro DOMAIN/s: Protein of unknown function DUF220 (InterPro																					1	1	1	1
AT1G23730.1	| Symbols: ATBCA3, BCA3 | beta carbonic anhydrase 3 | chr1:8395965-8398014 FORWARD LENGTH=258																													1	1	1	1
AT1G23740.1	| Symbols: | Oxidoreductase, zinc-binding dehydrogenase family protein | chr1:8398245-8399656 REVERSE LENGTH=386													10	14	14	14	14	16	16	16	5	6	6	6	7	8	8	8	8	9	9	9	3	4	4	4	3	3	3	3	5	5	5	5	3	4	4	4
AT1G23750.1	| Symbols: | Nucleic acid-binding, OB-fold-like protein | chr1:8400638-8401171 FORWARD LENGTH=137																													2	2	2	2	1	1	1	1					1	1	1	1	1	1	1	1
AT1G23800.1	| Symbols: ALDH2B7, ALDH2B | aldehyde dehydrogenase 2B7 | chr1:8412238-8414804 REVERSE LENGTH=534
AT1G23820.1	| Symbols: SPDS1 | spermidine synthase 1 | chr1:8420278-8422724 FORWARD LENGTH=378
AT1G23860.1	| Symbols: SRZ-21, SRZ21, RSZP21, RSZ21, At-RSZ21 | RS-containing zinc finger protein 21 | chr1:8428091-8429164 REVERSE LENGTH=187									1	1	0	0.2
AT1G23890.2	| Symbols: | NHL domain-containing protein | chr1:8438900-8440803 REVERSE LENGTH=400																																													1	1	1	1
AT1G23900.1	| Symbols: GAMMA-ADAPTIN 1, Gamma-ADR | gamma-adaptin 1 | chr1:8441379-8447152 FORWARD LENGTH=876	2	2	2	2	3	3	3	3	3	3	3	3	1	2	2	2	3	4	4	4	3	5	5	5
AT1G23910.1	| Symbols: | Polyketide cyclase/dehydrase and lipid transport superfamily protein | chr1:8451068-8451289 REVERSE LENGTH=73																																									1	1	1	1
AT1G23950.2	| Symbols: | Protein of unknown function (DUF626) | chr1:8469712-8471353 REVERSE LENGTH=373
AT1G23960.1	| Symbols: | Protein of unknown function (DUF626) | chr1:8478627-8480006 REVERSE LENGTH=302													3	4	4	4	4	4	4	4	2	2	2	2
AT1G24000.1	| Symbols: | Polyketide cyclase/dehydrase and lipid transport superfamily protein | chr1:8496057-8496526 REVERSE LENGTH=122													7	9	9	9	3	4	4	4	6	7	7	7
AT1G24050.1	| Symbols: | RNA-processing, Lsm domain | chr1:8507057-8508439 FORWARD LENGTH=188	1	2	2	2													1	2	2	2	5	7	7	7	7	10	10	10	6	8	8	8	6	9	9	9	6	8	8	8	6	7	7	7	4	5	5	5
AT1G24100.1	| Symbols: UGT74B1 | UDP-glucosyl transferase 74B1 | chr1:8525547-8527010 REVERSE LENGTH=460
AT1G24180.1	| Symbols: IAR4 | Thiamin diphosphate-binding fold (THDP-binding) superfamily protein | chr1:8560777-8563382 REVERSE LENGTH=393					8	8	5	6.25	13	15	12	13.25	1	1	0	0.42					2	2	2	2	1	1	0	0.42					2	2	2	2	9	9	6	7.25	5	5	4	4.42	6	8	3	5.08
AT1G24190.2	| Symbols: SNL3 | SIN3-like 3 | chr1:8563858-8569927 REVERSE LENGTH=1326
AT1G24280.1	| Symbols: G6PD3 | glucose-6-phosphate dehydrogenase 3 | chr1:8609495-8612383 FORWARD LENGTH=599									1	1	0	0.33																									1	1	0	0.18	2	2	0	0.51	4	4	0	1.18
AT1G24300.2	| Symbols: | GYF domain-containing protein | chr1:8614515-8620420 REVERSE LENGTH=1490																	1	1	1	1
AT1G24310.1	| Symbols: | unknown protein; FUNCTIONS IN: molecular_function unknown; INVOLVED IN: biological_process unknown; LOCATED IN: nucleolus; EXPRESSED IN: 20 plant structures; EXPRESSED DURING: 13 growth stages; Has 2922 Blast hits to 2454 proteins in 2																																									1	1	1	1	3	3	3	3
AT1G24360.1	| Symbols: | NAD(P)-binding Rossmann-fold superfamily protein | chr1:8640820-8643283 FORWARD LENGTH=319					1	1	1	1	3	3	3	3	6	6	6	6	6	7	7	7	1	1	1	1	2	2	2	2	4	4	4	4					6	7	7	7	5	5	5	5	3	3	3	3
AT1G24450.1	| Symbols: NFD2 | Ribonuclease III family protein | chr1:8664201-8665077 FORWARD LENGTH=191					3	3	3	3	3	4	4	4	5	6	6	6	3	3	3	3									1	1	1	1					2	2	2	2	1	1	1	1
AT1G24460.2	| Symbols: | unknown protein; FUNCTIONS IN: molecular_function unknown; INVOLVED IN: biological_process unknown; LOCATED IN: cellular_component unknown; EXPRESSED IN: 22 plant structures; EXPRESSED DURING: 14 growth stages; BEST Arabidopsis thalian
AT1G24510.1	| Symbols: | TCP-1/cpn60 chaperonin family protein | chr1:8685504-8688101 REVERSE LENGTH=535					2	2	2	2	13	16	16	16									1	2	2	2
AT1G24610.1	| Symbols: | Rubisco methyltransferase family protein | chr1:8720906-8722711 REVERSE LENGTH=476																																									1	1	1	1	6	6	6	6
AT1G24650.1	| Symbols: | Leucine-rich repeat protein kinase family protein | chr1:8734570-8737315 FORWARD LENGTH=886
AT1G24735.2	| Symbols: | S-adenosyl-L-methionine-dependent methyltransferases superfamily protein | chr1:8757977-8759448 FORWARD LENGTH=291													1	1	1	1	1	1	1	1	1	1	1	1																	1	1	1	1
AT1G24764.1	| Symbols: ATMAP70-2, MAP70-2 | microtubule-associated proteins 70-2 | chr1:8760001-8763256 REVERSE LENGTH=634																																													1	1	1	1
AT1G24909.1	| Symbols: | Glutamine amidotransferase type 1 family protein | chr1:8786145-8787914 REVERSE LENGTH=222																																									1	1	0	0.5	1	1	0	0.5
AT1G25055.1	| Symbols: | F-box family protein | chr1:8806649-8807950 FORWARD LENGTH=433
AT1G25145.1	| Symbols: | UDP-3-O-acyl N-acetylglycosamine deacetylase family protein | chr1:8818867-8820493 FORWARD LENGTH=326
AT1G25260.1	| Symbols: | Ribosomal protein L10 family protein | chr1:8854163-8855766 REVERSE LENGTH=235					4	4	4	4	3	4	4	4									1	1	1	1
AT1G25350.1	| Symbols: OVA9 | glutamine-tRNA ligase, putative / glutaminyl-tRNA synthetase, putative / GlnRS, putative | chr1:8889280-8894205 REVERSE LENGTH=795
AT1G25375.1	| Symbols: | Metallo-hydrolase/oxidoreductase superfamily protein | chr1:8900279-8903220 REVERSE LENGTH=524
AT1G25420.1	| Symbols: | Regulator of Vps4 activity in the MVB pathway protein | chr1:8916141-8917980 FORWARD LENGTH=323	1	1	1	1	1	1	1	1					6	6	6	6	3	3	3	3	3	3	3	3
AT1G25490.1	| Symbols: RCN1, REGA, ATB BETA BETA, EER1 | ARM repeat superfamily protein | chr1:8951700-8954899 FORWARD LENGTH=588									1	1	1	1
AT1G25540.2	| Symbols: PFT1 | phytochrome and flowering time regulatory protein (PFT1) | chr1:8969392-8973301 REVERSE LENGTH=727																					1	1	1	1
AT1G25580.1	| Symbols: SOG1, ANAC008 | NAC (No Apical Meristem) domain transcriptional regulator superfamily protein | chr1:8997064-8999600 REVERSE LENGTH=449
AT1G26090.1	| Symbols: | P-loop containing nucleoside triphosphate hydrolases superfamily protein | chr1:9020509-9022619 FORWARD LENGTH=455													6	6	6	6	5	5	5	5	1	1	1	1	4	5	5	5	5	5	5	5	4	4	4	4					2	2	2	2	4	4	4	4
AT1G26110.1	| Symbols: DCP5 | decapping 5 | chr1:9024616-9027556 REVERSE LENGTH=611													4	6	6	6	4	6	6	6	6	11	11	11	2	2	2	2	1	1	1	1	1	1	1	1
AT1G26160.1	| Symbols: | Metal-dependent phosphohydrolase | chr1:9044784-9046945 REVERSE LENGTH=258																																													2	2	2	2
AT1G26170.1	| Symbols: | ARM repeat superfamily protein | chr1:9047539-9054438 REVERSE LENGTH=1022
AT1G26300.1	| Symbols: | BSD domain-containing protein | chr1:9096023-9099746 REVERSE LENGTH=316
AT1G26320.1	| Symbols: | Zinc-binding dehydrogenase family protein | chr1:9105240-9107029 FORWARD LENGTH=351	2	2	0	0.1													1	1	0	0.05	3	3	0	0.15	4	4	1	1.15	3	3	1	1.1	3	5	0	0.24	4	4	2	2.1	7	8	4	4.65	5	5	1	1.65
AT1G26340.1	| Symbols: B5 #6, ATCB5-A, CB5-A | cytochrome B5 isoform A | chr1:9113992-9114755 FORWARD LENGTH=135					1	1	1	1
AT1G26400.1	| Symbols: | FAD-binding Berberine family protein | chr1:9133291-9134874 REVERSE LENGTH=527									1	1	1	1																	1	1	1	1
AT1G26450.1	| Symbols: | Carbohydrate-binding X8 domain superfamily protein | chr1:9149003-9150063 REVERSE LENGTH=197																									1	1	1	1
AT1G26460.1	| Symbols: | Tetratricopeptide repeat (TPR)-like superfamily protein | chr1:9151816-9154407 FORWARD LENGTH=630					1	1	1	1
AT1G26470.1	| Symbols: | FUNCTIONS IN: molecular_function unknown; INVOLVED IN: regulation of transcription; LOCATED IN: nucleus, H4/H2A histone acetyltransferase complex; EXPRESSED IN: 23 plant structures; EXPRESSED DURING: 15 growth stages; CONTAINS InterPro
AT1G26480.1	| Symbols: GRF12, GF14 IOTA | general regulatory factor 12 | chr1:9156573-9157845 REVERSE LENGTH=268	2	2	0	0.01	1	1	0	0.01	1	1	0	0.01
AT1G26560.1	| Symbols: BGLU40 | beta glucosidase 40 | chr1:9178513-9181726 FORWARD LENGTH=510	1	1	1	1
AT1G26570.1	| Symbols: UGD1, ATUGD1 | UDP-glucose dehydrogenase 1 | chr1:9182801-9184246 FORWARD LENGTH=481					2	2	1	1.29	7	7	3	4.38	1	1	0	0.29	1	1	0	0.29	2	2	0	0.58	1	1	0	0.29													1	1	0	0.29	3	3	1	1.81
AT1G26630.1	| Symbols: FBR12, ATELF5A-2, ELF5A-2 | Eukaryotic translation initiation factor 5A-1 (eIF-5A 1) protein | chr1:9205968-9207098 FORWARD LENGTH=159	1	1	1	1	4	6	6	6	10	15	13	14.3	2	4	4	4	1	2	2	2	1	2	2	2	1	3	3	3	1	2	2	2	1	3	3	3	4	5	5	5	2	3	3	3	3	4	4	4
AT1G26640.1	| Symbols: | Amino acid kinase family protein | chr1:9207620-9209766 REVERSE LENGTH=332
AT1G26660.1	| Symbols: | Prefoldin chaperone subunit family protein | chr1:9212298-9213765 FORWARD LENGTH=152
AT1G26680.1	| Symbols: | transcriptional factor B3 family protein | chr1:9219552-9223193 FORWARD LENGTH=920
AT1G26750.1	| Symbols: | unknown protein; Has 44 Blast hits to 44 proteins in 16 species: Archae - 0; Bacteria - 0; Metazoa - 0; Fungi - 0; Plants - 44; Viruses - 0; Other Eukaryotes - 0 (source: NCBI BLink). | chr1:9246857-9248053 FORWARD LENGTH=195									2	2	2	2
AT1G26761.1	| Symbols: | Arabinanase/levansucrase/invertase | chr1:9250269-9251603 REVERSE LENGTH=444
AT1G26830.1	| Symbols: CUL3A, ATCUL3A, ATCUL3, CUL3 | cullin 3 | chr1:9296063-9298374 FORWARD LENGTH=732					1	1	1	1
AT1G26850.1	| Symbols: | S-adenosyl-L-methionine-dependent methyltransferases superfamily protein | chr1:9301146-9303432 REVERSE LENGTH=616									4	4	4	4																																	1	1	1	1
AT1G26880.1	| Symbols: | Ribosomal protein L34e superfamily protein | chr1:9315640-9316681 REVERSE LENGTH=120					2	2	0	0.83	3	3	1	1.83									2	2	0	0.83
AT1G26940.1	| Symbols: | Cyclophilin-like peptidyl-prolyl cis-trans isomerase family protein | chr1:9343193-9344962 FORWARD LENGTH=226																	1	1	1	1
AT1G27020.1	| Symbols: | unknown protein; BEST Arabidopsis thaliana protein match is: unknown protein (TAIR:AT1G27030.1); Has 514 Blast hits to 514 proteins in 175 species: Archae - 0; Bacteria - 311; Metazoa - 0; Fungi - 0; Plants - 65; Viruses - 0; Other Euk
AT1G27090.1	| Symbols: | glycine-rich protein | chr1:9404041-9406098 REVERSE LENGTH=420					1	1	1	1	11	12	12	12
AT1G27100.1	| Symbols: | Actin cross-linking protein | chr1:9407557-9411074 REVERSE LENGTH=519
AT1G27120.1	| Symbols: | Galactosyltransferase family protein | chr1:9421389-9423910 FORWARD LENGTH=673
AT1G27130.1	| Symbols: ATGSTU13, GST12, GSTU13 | glutathione S-transferase tau 13 | chr1:9425582-9426597 FORWARD LENGTH=227																																	3	4	4	4	10	16	16	16	10	19	19	19	12	19	19	19
AT1G27150.1	| Symbols: | Tetratricopeptide repeat (TPR)-like superfamily protein | chr1:9429177-9432068 FORWARD LENGTH=468																																													3	4	4	4
AT1G27310.1	| Symbols: NTF2A | nuclear transport factor 2A | chr1:9484615-9485790 REVERSE LENGTH=122													9	27	27	27	3	4	4	4	7	16	16	16	8	10	10	10	3	4	4	4	7	12	12	12	4	4	4	4	2	2	2	2	3	4	4	4
AT1G27380.2	| Symbols: RIC2 | ROP-interactive CRIB motif-containing protein 2 | chr1:9508903-9509827 REVERSE LENGTH=111
AT1G27385.1	| Symbols: | unknown protein; FUNCTIONS IN: molecular_function unknown; INVOLVED IN: biological_process unknown; LOCATED IN: chloroplast; EXPRESSED IN: 24 plant structures; EXPRESSED DURING: 13 growth stages; CONTAINS InterPro DOMAIN/s: Protein of																																					1	1	1	1
AT1G27400.1	| Symbols: | Ribosomal protein L22p/L17e family protein | chr1:9515230-9516725 FORWARD LENGTH=176					4	10	10	10	7	21	21	21									4	5	5	5					1	1	1	1
AT1G27430.1	| Symbols: | GYF domain-containing protein | chr1:9521045-9526928 REVERSE LENGTH=1492
AT1G27435.1	| Symbols: | unknown protein; Has 16 Blast hits to 16 proteins in 8 species: Archae - 0; Bacteria - 0; Metazoa - 0; Fungi - 0; Plants - 16; Viruses - 0; Other Eukaryotes - 0 (source: NCBI BLink). | chr1:9527956-9528814 REVERSE LENGTH=81					1	1	1	1	1	1	1	1
AT1G27450.2	| Symbols: APT1, ATAPT1 | adenine phosphoribosyl transferase 1 | chr1:9532421-9533807 FORWARD LENGTH=183					2	2	0	0.67	6	9	0	3	1	1	0	0.33					3	4	0	1.33	5	7	0	2.33	4	5	0	1.67	3	4	0	1.33	10	15	0	5	10	16	1	6	12	23	1	8.33
AT1G27450.3	| Symbols: APT1 | adenine phosphoribosyl transferase 1 | chr1:9532042-9533807 FORWARD LENGTH=284					2	2	0	1.33	7	10	1	7	1	1	0	0.67					3	4	0	2.67	5	7	0	4.67	4	5	0	3.33	3	4	0	2.67	12	17	2	12	11	17	2	12	13	24	2	16.67
AT1G27480.1	| Symbols: | alpha/beta-Hydrolases superfamily protein | chr1:9544607-9546168 FORWARD LENGTH=432									1	1	1	1
AT1G27500.1	| Symbols: | Tetratricopeptide repeat (TPR)-like superfamily protein | chr1:9551629-9553654 REVERSE LENGTH=650
AT1G27510.1	| Symbols: | Protein of unknown function (DUF3506) | chr1:9554945-9558293 REVERSE LENGTH=651
AT1G27530.1	| Symbols: | CONTAINS InterPro DOMAIN/s: Ubiquitin-conjugating enzyme/RWD-like (InterPro:IPR016135), Ubiquitin-fold modifier-conjugating enzyme 1 (InterPro:IPR014806); Has 269 Blast hits to 269 proteins in 110 species: Archae - 0; Bacteria - 0; Met	1	1	1	1									6	6	6	6	2	2	2	2	2	2	2	2	5	6	6	6	4	5	5	5	3	3	3	3	2	2	2	2	1	1	1	1
AT1G27540.2	| Symbols: | Protein of unknown function (DUF295) | chr1:9566608-9567849 REVERSE LENGTH=383
AT1G27565.1	| Symbols: | unknown protein; FUNCTIONS IN: molecular_function unknown; INVOLVED IN: biological_process unknown; LOCATED IN: cellular_component unknown; BEST Arabidopsis thaliana protein match is: unknown protein (TAIR:AT1G52905.1); Has 3 Blast hit
AT1G27595.1	| Symbols: | CONTAINS InterPro DOMAIN/s: Symplekin tight junction protein C-terminal (InterPro:IPR022075); BEST Arabidopsis thaliana protein match is: HEAT repeat-containing protein (TAIR:AT5G01400.1); Has 593 Blast hits to 297 proteins in 111 spec									1	1	1	1
AT1G27630.1	| Symbols: CYCT1;3 | cyclin T 1;3 | chr1:9611647-9613967 FORWARD LENGTH=317
AT1G27640.1	| Symbols: | Putative role in leaf development. Comparison of SALK_123839C to Columbia under normal growth conditions resulted in a trend toward increased leaf length in the mutant (P=0.13; median 22 for mutant,17 for Columbia) (Ann Stapleton and
AT1G27650.1	| Symbols: ATU2AF35A | U2 snRNP auxiliary factor small subunit, putative | chr1:9615152-9616042 FORWARD LENGTH=296					1	1	0	0.6	3	3	0	1.8
AT1G27680.1	| Symbols: APL2 | ADPGLC-PPase large subunit | chr1:9631630-9634450 FORWARD LENGTH=518
AT1G27750.1	| Symbols: | nucleic acid binding | chr1:9657425-9661750 FORWARD LENGTH=1075																	1	1	1	1
AT1G27752.2	| Symbols: | Ubiquitin system component Cue protein | chr1:9663144-9667318 FORWARD LENGTH=656
AT1G27760.3	| Symbols: SAT32, ATSAT32 | interferon-related developmental regulator family protein / IFRD protein family | chr1:9668895-9671322 FORWARD LENGTH=441					1	1	1	1	1	1	1	1
AT1G27770.2	| Symbols: ACA1, PEA1 | autoinhibited Ca2+-ATPase 1 | chr1:9671912-9676010 REVERSE LENGTH=946					1	1	1	1	1	1	1	1
AT1G27900.1	| Symbols: | RNA helicase family protein | chr1:9715615-9720346 REVERSE LENGTH=700
AT1G27910.1	| Symbols: PUB45, ATPUB45 | plant U-box 45 | chr1:9720962-9723975 REVERSE LENGTH=768
AT1G27930.1	| Symbols: | Protein of unknown function (DUF579) | chr1:9731510-9732379 REVERSE LENGTH=289					1	1	1	1	2	2	2	2
AT1G27970.1	| Symbols: NTF2B | nuclear transport factor 2B | chr1:9746921-9747787 FORWARD LENGTH=126													11	23	23	23	10	20	20	20	11	23	23	23	13	23	23	23	9	14	14	14	11	20	20	20	8	10	10	10	7	10	10	10	8	13	13	13
AT1G27980.1	| Symbols: DPL1, ATDPL1 | dihydrosphingosine phosphate lyase | chr1:9748812-9752618 FORWARD LENGTH=544									1	1	1	1
AT1G28060.1	| Symbols: | Pre-mRNA-splicing factor 3 | chr1:9779167-9782486 FORWARD LENGTH=786									1	1	1	1
AT1G28110.1	| Symbols: SCPL45 | serine carboxypeptidase-like 45 | chr1:9804153-9806832 REVERSE LENGTH=461					5	6	6	6	7	9	9	9					2	2	2	2
AT1G28120.1	| Symbols: | CONTAINS InterPro DOMAIN/s: Ovarian tumour, otubain (InterPro:IPR003323), Ubiquitin thioesterase Otubain (InterPro:IPR016615), Peptidase C65, otubain (InterPro:IPR019400); Has 413 Blast hits to 411 proteins in 139 species: Archae - 0;
AT1G28200.1	| Symbols: FIP1 | FH interacting protein 1 | chr1:9850395-9852300 REVERSE LENGTH=259	1	1	1	1	3	3	3	3					10	11	11	11	7	7	7	7	4	4	4	4	4	4	4	4									1	1	1	1
AT1G28290.1	| Symbols: AGP31 | arabinogalactan protein 31 | chr1:9889331-9890843 REVERSE LENGTH=359					3	4	4	4	5	6	6	6	1	1	1	1	3	4	4	4	1	1	1	1	1	1	1	1	3	3	3	3					2	2	2	2	3	3	3	3
AT1G28340.1	| Symbols: AtRLP4, RLP4 | receptor like protein 4 | chr1:9940175-9943252 FORWARD LENGTH=626					1	1	1	1	1	1	1	1																					1	1	1	1
AT1G28350.1	| Symbols: | Nucleotidylyl transferase superfamily protein | chr1:9944483-9949577 FORWARD LENGTH=748																																					14	18	15	16.97	15	17	15	16.31	19	26	21	24.28
AT1G28420.1	| Symbols: HB-1 | homeobox-1 | chr1:9979936-9987460 FORWARD LENGTH=1705
AT1G28470.1	| Symbols: ANAC010, SND3, NAC010 | NAC domain containing protein 10 | chr1:10010259-10011867 FORWARD LENGTH=314
AT1G28490.1	| Symbols: SYP61, ATSYP61, OSM1 | syntaxin of plants 61 | chr1:10016433-10017842 FORWARD LENGTH=245					3	3	3	3	1	1	1	1
AT1G28580.1	| Symbols: | GDSL-like Lipase/Acylhydrolase superfamily protein | chr1:10044603-10046379 REVERSE LENGTH=390
AT1G28590.1	| Symbols: | GDSL-like Lipase/Acylhydrolase superfamily protein | chr1:10047509-10049300 REVERSE LENGTH=403
AT1G28680.1	| Symbols: | HXXXD-type acyl-transferase family protein | chr1:10078222-10079763 FORWARD LENGTH=451																																													2	2	2	2
AT1G28960.5	| Symbols: ATNUDT15, ATNUDX15, NUDX15 | nudix hydrolase homolog 15 | chr1:10110135-10111607 REVERSE LENGTH=293
AT1G29030.1	| Symbols: | Apoptosis inhibitory protein 5 (API5) | chr1:10129201-10133697 REVERSE LENGTH=556					1	1	1	1	2	2	2	2
AT1G29040.3	| Symbols: | unknown protein; LOCATED IN: chloroplast, vacuole; EXPRESSED IN: 22 plant structures; EXPRESSED DURING: 13 growth stages; CONTAINS InterPro DOMAIN/s: Conserved hypothetical protein CHP02058 (InterPro:IPR011719); Has 35333 Blast hits to
AT1G29060.1	| Symbols: | Target SNARE coiled-coil domain protein | chr1:10147857-10149459 FORWARD LENGTH=134					1	1	1	1
AT1G29120.5	| Symbols: | Hydrolase-like protein family | chr1:10174481-10178143 FORWARD LENGTH=456
AT1G29150.1	| Symbols: ATS9, RPN6 | non-ATPase subunit 9 | chr1:10181240-10182499 FORWARD LENGTH=419					7	7	7	7	12	14	14	14	2	2	2	2	3	3	3	3	8	8	8	8	12	15	15	15	8	9	9	9	10	11	11	11	13	16	16	16	13	14	14	14	8	9	9	9
AT1G29230.1	| Symbols: CIPK18, SnRK3.20, ATWL1, WL1, ATCIPK18 | CBL-interacting protein kinase 18 | chr1:10214860-10216422 FORWARD LENGTH=520									1	1	1	1
AT1G29250.1	| Symbols: | Alba DNA/RNA-binding protein | chr1:10223461-10224592 REVERSE LENGTH=130					3	3	3	3	10	12	11	11.82									2	2	2	2																					1	1	1	1
AT1G29260.1	| Symbols: PEX7, ATPEX7 | peroxin 7 | chr1:10224923-10225876 FORWARD LENGTH=317
AT1G29320.1	| Symbols: | Transducin/WD40 repeat-like superfamily protein | chr1:10255355-10258238 FORWARD LENGTH=468									3	3	3	3
AT1G29350.1	| Symbols: | Kinase-related protein of unknown function (DUF1296) | chr1:10268761-10273613 REVERSE LENGTH=831									1	1	0	0.67	3	3	0	2	1	1	1	1					1	1	0	0.67	1	1	0	0.67	1	1	0	0.67					1	2	0	1.33	2	3	1	2.33
AT1G29370.1	| Symbols: | Kinase-related protein of unknown function (DUF1296) | chr1:10278080-10283024 REVERSE LENGTH=831									1	1	0	0.33	3	3	0	1									1	1	0	0.33	1	1	0	0.33	1	1	0	0.33					2	3	1	1.67	1	2	0	0.67
AT1G29460.1	| Symbols: | SAUR-like auxin-responsive protein family | chr1:10307609-10308055 REVERSE LENGTH=148
AT1G29470.1	| Symbols: | S-adenosyl-L-methionine-dependent methyltransferases superfamily protein | chr1:10310424-10313369 REVERSE LENGTH=770					1	1	1	1	1	1	1	1	1	1	0	0.4
AT1G29670.1	| Symbols: | GDSL-like Lipase/Acylhydrolase superfamily protein | chr1:10375843-10377717 FORWARD LENGTH=363																																	1	2	2	2
AT1G29690.1	| Symbols: CAD1 | MAC/Perforin domain-containing protein | chr1:10379310-10381861 REVERSE LENGTH=561													1	1	1	1	1	1	1	1	1	1	1	1					1	1	1	1
AT1G29710.1	| Symbols: | Tetratricopeptide repeat (TPR)-like superfamily protein | chr1:10387673-10389100 FORWARD LENGTH=475
AT1G29760.1	| Symbols: | Putative adipose-regulatory protein (Seipin) | chr1:10422381-10424116 FORWARD LENGTH=526
AT1G29790.1	| Symbols: | S-adenosyl-L-methionine-dependent methyltransferases superfamily protein | chr1:10430025-10431161 FORWARD LENGTH=378					1	1	1	1	2	2	2	2
AT1G29810.1	| Symbols: | Transcriptional coactivator/pterin dehydratase | chr1:10435606-10437406 REVERSE LENGTH=187													1	1	1	1	2	2	2	2	1	1	1	1	4	4	4	4	4	4	4	4	2	3	3	3	2	2	2	2	2	2	2	2	3	3	3	3
AT1G29840.1	| Symbols: | alpha/beta-Hydrolases superfamily protein | chr1:10445735-10447422 REVERSE LENGTH=263																									2	2	1	1.59	2	2	2	2	11	11	10	10.72	8	8	7	7.72	5	5	5	5	4	4	3	3.72
AT1G29850.1	| Symbols: | double-stranded DNA-binding family protein | chr1:10447866-10449630 FORWARD LENGTH=129	4	4	4	4	2	3	3	3					2	2	2	2	1	1	1	1	2	2	2	2
AT1G29880.1	| Symbols: | glycyl-tRNA synthetase / glycine--tRNA ligase | chr1:10459662-10462781 REVERSE LENGTH=729					1	2	2	2	12	12	12	12									1	1	1	1													12	12	11	11.98	13	20	20	20	26	36	35	35.98
AT1G29900.1	| Symbols: CARB | carbamoyl phosphate synthetase B | chr1:10468164-10471976 FORWARD LENGTH=1187	1	1	1	1					8	9	9	9	3	3	3	3	3	3	3	3	1	1	1	1					1	1	1	1
AT1G29910.1	| Symbols: CAB3, AB180, LHCB1.2 | chlorophyll A/B binding protein 3 | chr1:10472443-10473246 REVERSE LENGTH=267					1	1	1	1	1	1	1	1									1	1	1	1	3	3	3	3
AT1G29940.1	| Symbols: NRPA2 | nuclear RNA polymerase A2 | chr1:10479322-10486670 REVERSE LENGTH=1178																									1	1	1	1	1	1	1	1
AT1G29965.1	| Symbols: | Ribosomal protein L18ae/LX family protein | chr1:10498458-10499373 REVERSE LENGTH=178					12	25	1	3.31	16	48	1	5.51									6	13	0	1.21
AT1G29990.1	| Symbols: PFD6 | prefoldin 6 | chr1:10507666-10508821 FORWARD LENGTH=129
AT1G30000.1	| Symbols: MNS3 | alpha-mannosidase 3 | chr1:10509532-10512320 REVERSE LENGTH=624																																	6	8	8	8	2	2	2	2	1	2	2	2
AT1G30070.2	| Symbols: | SGS domain-containing protein | chr1:10546794-10548072 REVERSE LENGTH=229	1	1	1	1									6	8	8	8	3	4	4	4	2	2	2	2	1	1	1	1	2	2	2	2
AT1G30110.1	| Symbols: ATNUDX25, NUDX25 | nudix hydrolase homolog 25 | chr1:10582700-10583821 FORWARD LENGTH=175
AT1G30120.1	| Symbols: PDH-E1 BETA | pyruvate dehydrogenase E1 beta | chr1:10584350-10586477 REVERSE LENGTH=406	1	1	0	0.8	5	6	2	5.2	9	11	2	9.2					1	1	0	0.8	4	4	1	3.4									1	1	0	0.8
AT1G30230.2	| Symbols: | Glutathione S-transferase, C-terminal-like;Translation elongation factor EF1B/ribosomal protein S6 | chr1:10639286-10640601 FORWARD LENGTH=260									2	2	2	2																	2	2	1	1.54	1	1	0	0.54
AT1G30240.1	| Symbols: | FUNCTIONS IN: binding; INVOLVED IN: biological_process unknown; LOCATED IN: cellular_component unknown; EXPRESSED IN: 21 plant structures; EXPRESSED DURING: 13 growth stages; CONTAINS InterPro DOMAIN/s: Armadillo-type fold (InterPro:IP									1	1	1	1
AT1G30300.1	| Symbols: | Metallo-hydrolase/oxidoreductase superfamily protein | chr1:10673084-10675061 FORWARD LENGTH=324																																					1	1	1	1					1	1	1	1
AT1G30360.1	| Symbols: ERD4 | Early-responsive to dehydration stress protein (ERD4) | chr1:10715892-10718799 FORWARD LENGTH=724					2	2	2	2																																	1	1	1	1	1	1	1	1
AT1G30400.1	| Symbols: ATMRP1, EST1, ABCC1, ATABCC1, MRP1 | multidrug resistance-associated protein 1 | chr1:10728139-10737697 FORWARD LENGTH=1622					2	2	2	2	1	1	1	1
AT1G30450.2	| Symbols: CCC1, ATCCC1, HAP5 | cation-chloride co-transporter 1 | chr1:10762905-10769061 FORWARD LENGTH=975					1	2	2	2	2	2	2	2
AT1G30470.1	| Symbols: | SIT4 phosphatase-associated family protein | chr1:10779423-10786415 FORWARD LENGTH=811
AT1G30510.3	| Symbols: ATRFNR2, RFNR2 | root FNR 2 | chr1:10807150-10808292 REVERSE LENGTH=317																					1	1	0	0.44	19	23	14	17.98	11	12	5	8.09	26	47	25	34.72	21	25	17	20.53	18	24	15	18.98	3	3	3	3
AT1G30530.1	| Symbols: UGT78D1 | UDP-glucosyl transferase 78D1 | chr1:10814917-10816374 FORWARD LENGTH=453																																					1	1	0	0.36	2	2	0	0.71	3	4	0	1.43
AT1G30540.1	| Symbols: | Actin-like ATPase superfamily protein | chr1:10816951-10819172 REVERSE LENGTH=351
AT1G30570.1	| Symbols: HERK2 | hercules receptor kinase 2 | chr1:10828933-10831482 FORWARD LENGTH=849					1	1	0	0.1					2	2	2	2	1	1	1	1	1	1	1	1	2	2	2	2	1	2	2	2
AT1G30580.1	| Symbols: | GTP binding | chr1:10831953-10835454 REVERSE LENGTH=394					2	2	2	2	9	10	10	10									2	3	3	3	11	12	12	12	8	8	8	8	9	10	10	10	25	38	38	38	24	39	39	39	28	52	52	52
AT1G30600.1	| Symbols: | Subtilase family protein | chr1:10841341-10844906 REVERSE LENGTH=832													12	14	14	14	6	6	6	6	9	13	13	13
AT1G30630.1	| Symbols: | Coatomer epsilon subunit | chr1:10858546-10860173 REVERSE LENGTH=292					1	1	1	1	6	6	6	6									2	2	2	2
AT1G30660.1	| Symbols: | nucleic acid binding;nucleic acid binding | chr1:10876853-10879017 FORWARD LENGTH=337																																					1	1	1	1
AT1G30690.2	| Symbols: | Sec14p-like phosphatidylinositol transfer family protein | chr1:10888284-10890085 FORWARD LENGTH=540
AT1G30700.1	| Symbols: | FAD-binding Berberine family protein | chr1:10892623-10894437 FORWARD LENGTH=527																									1	1	1	1	3	3	3	3	1	1	1	1									1	1	1	1
AT1G30720.1	| Symbols: | FAD-binding Berberine family protein | chr1:10898197-10899780 FORWARD LENGTH=527																	1	2	2	2	1	1	1	1
AT1G30810.2	| Symbols: | Transcription factor jumonji (jmj) family protein / zinc finger (C5HC2 type) family protein | chr1:10938139-10941505 REVERSE LENGTH=819
AT1G30860.1	| Symbols: | RING/U-box superfamily protein | chr1:10986696-10989246 REVERSE LENGTH=730
AT1G30880.1	| Symbols: | unknown protein; Has 24 Blast hits to 24 proteins in 8 species: Archae - 0; Bacteria - 0; Metazoa - 2; Fungi - 0; Plants - 22; Viruses - 0; Other Eukaryotes - 0 (source: NCBI BLink). | chr1:10993379-10994056 REVERSE LENGTH=120
AT1G30910.1	| Symbols: | Molybdenum cofactor sulfurase family protein | chr1:11000912-11002801 FORWARD LENGTH=318																																	3	3	3	3	7	8	8	8	6	11	11	11	6	8	8	8
AT1G31010.1	| Symbols: OSB4 | organellar single-stranded DNA binding protein 4 | chr1:11054926-11056873 REVERSE LENGTH=360																													1	1	1	1
AT1G31020.1	| Symbols: ATO2, TO2 | thioredoxin O2 | chr1:11057252-11058703 FORWARD LENGTH=159	5	5	5	5	3	3	3	3	1	1	1	1
AT1G31070.2	| Symbols: GlcNAc1pUT1 | N-acetylglucosamine-1-phosphate uridylyltransferase 1 | chr1:11084951-11088361 FORWARD LENGTH=505																	1	1	0	0.38					5	6	6	6	3	4	4	4	7	7	4	5.14	6	6	3	4.14	5	5	3	3.76	8	8	2	4.29
AT1G31130.1	| Symbols: | unknown protein; FUNCTIONS IN: molecular_function unknown; INVOLVED IN: biological_process unknown; LOCATED IN: cellular_component unknown; EXPRESSED IN: 23 plant structures; EXPRESSED DURING: 13 growth stages; BEST Arabidopsis thalian					2	2	2	2	2	2	2	2
AT1G31160.1	| Symbols: HINT 2 | HISTIDINE TRIAD NUCLEOTIDE-BINDING 2 | chr1:11122880-11124106 REVERSE LENGTH=187																					1	1	1	1	3	3	3	3	1	1	1	1	6	9	9	9	6	11	11	11	6	12	12	12	6	14	14	14
AT1G31170.4	| Symbols: SRX | sulfiredoxin | chr1:11133521-11134686 FORWARD LENGTH=198													1	1	1	1	1	1	1	1
AT1G31180.1	| Symbols: ATIMD3, IMD3, IPMDH1 | isopropylmalate dehydrogenase 3 | chr1:11142843-11144617 REVERSE LENGTH=404					5	5	3	4.22	14	18	9	15.28					1	1	1	1	7	7	3	5.83													10	11	7	9.44	10	13	9	11.44	15	26	17	22.5
AT1G31190.1	| Symbols: IMPL1 | myo-inositol monophosphatase like 1 | chr1:11144861-11146800 FORWARD LENGTH=371
AT1G31220.1	| Symbols: | Formyl transferase | chr1:11157064-11158408 FORWARD LENGTH=292					9	9	9	9	8	9	9	9					1	1	1	1	4	4	4	4	3	3	3	3	4	4	4	4	3	3	3	3	9	10	10	10	11	14	14	14	12	14	14	14
AT1G31230.1	| Symbols: AK-HSDH I, AK-HSDH | aspartate kinase-homoserine dehydrogenase i | chr1:11158744-11163055 REVERSE LENGTH=911					5	6	6	6	13	14	13	13.68									1	1	1	1
AT1G31280.1	| Symbols: AGO2 | Argonaute family protein | chr1:11181777-11185112 FORWARD LENGTH=1014					1	1	1	1	1	2	2	2									1	1	1	1													1	1	1	1	1	1	1	1	1	1	1	1
AT1G31300.1	| Symbols: | TRAM, LAG1 and CLN8 (TLC) lipid-sensing domain containing protein | chr1:11194308-11195955 FORWARD LENGTH=278					1	1	1	1
AT1G31330.1	| Symbols: PSAF | photosystem I subunit F | chr1:11215011-11215939 REVERSE LENGTH=221					2	2	2	2	4	5	5	5									1	1	1	1
AT1G31340.1	| Symbols: RUB1, NEDD8, ATRUB1 | related to ubiquitin 1 | chr1:11218076-11219417 REVERSE LENGTH=156	4	6	0	2.14	5	8	0	2.86	2	2	0	0.71	7	22	1	8.5	6	10	1	4.21	9	28	7	14.5	3	4	2	2.71	7	11	8	9.07	2	3	1	1.71	1	1	1	1	1	1	1	1	1	1	1	1
AT1G31360.1	| Symbols: RECQL2, ATRECQ2, MED34 | RECQ helicase L2 | chr1:11232422-11237412 FORWARD LENGTH=705					3	3	3	3	3	3	3	3
AT1G31410.1	| Symbols: | putrescine-binding periplasmic protein-related | chr1:11247094-11249345 REVERSE LENGTH=524
AT1G31420.1	| Symbols: FEI1 | Leucine-rich repeat protein kinase family protein | chr1:11250360-11253516 FORWARD LENGTH=592
AT1G31440.1	| Symbols: | SH3 domain-containing protein | chr1:11256150-11258479 REVERSE LENGTH=439					7	9	9	9	5	6	6	6	1	1	1	1					2	2	2	2	2	2	2	2	1	1	1	1
AT1G31490.1	| Symbols: | HXXXD-type acyl-transferase family protein | chr1:11271744-11273078 REVERSE LENGTH=444					1	1	1	1									1	1	1	1
AT1G31500.4	| Symbols: | DNAse I-like superfamily protein | chr1:11273821-11276534 REVERSE LENGTH=417
AT1G31550.2	| Symbols: | GDSL-like Lipase/Acylhydrolase superfamily protein | chr1:11295635-11297284 REVERSE LENGTH=394
AT1G31730.1	| Symbols: | Adaptin family protein | chr1:11359907-11363916 FORWARD LENGTH=938																																									1	1	1	1
AT1G31780.1	| Symbols: | CONTAINS InterPro DOMAIN/s: Conserved oligomeric complex COG6 (InterPro:IPR010490); Has 384 Blast hits to 379 proteins in 190 species: Archae - 0; Bacteria - 4; Metazoa - 151; Fungi - 156; Plants - 42; Viruses - 0; Other Eukaryotes - 3									1	1	1	1
AT1G31790.1	| Symbols: | Tetratricopeptide repeat (TPR)-like superfamily protein | chr1:11394744-11395973 REVERSE LENGTH=409
AT1G31810.1	| Symbols: AFH14 | Formin Homology 14 | chr1:11399922-11405761 REVERSE LENGTH=1230																																					1	1	1	1	1	1	1	1
AT1G31812.1	| Symbols: ACBP6, ACBP | acyl-CoA-binding protein 6 | chr1:11411132-11412099 REVERSE LENGTH=92					1	1	1	1					5	6	6	6	5	6	6	6	8	10	10	10	5	9	9	9	9	13	13	13	3	4	4	4	1	1	1	1	3	3	3	3
AT1G31817.1	| Symbols: NFD3 | Ribosomal L18p/L5e family protein | chr1:11414932-11416356 REVERSE LENGTH=314									3	3	3	3
AT1G31850.3	| Symbols: | S-adenosyl-L-methionine-dependent methyltransferases superfamily protein | chr1:11431165-11433443 FORWARD LENGTH=603
AT1G31860.1	| Symbols: AT-IE, HISN2 | histidine biosynthesis bifunctional protein (HISIE) | chr1:11434250-11436530 REVERSE LENGTH=281
AT1G31910.1	| Symbols: | GHMP kinase family protein | chr1:11459050-11461649 FORWARD LENGTH=505
AT1G31920.1	| Symbols: | Tetratricopeptide repeat (TPR)-like superfamily protein | chr1:11461864-11463684 REVERSE LENGTH=606																									1	1	1	1
AT1G32050.1	| Symbols: | SCAMP family protein | chr1:11528616-11530974 FORWARD LENGTH=264					3	3	3	3	3	3	3	3
AT1G32060.1	| Symbols: PRK | phosphoribulokinase | chr1:11532668-11534406 FORWARD LENGTH=395
AT1G32100.1	| Symbols: ATPRR1, PRR1 | pinoresinol reductase 1 | chr1:11546472-11547953 REVERSE LENGTH=317
AT1G32120.1	| Symbols: | FUNCTIONS IN: molecular_function unknown; INVOLVED IN: biological_process unknown; LOCATED IN: membrane; EXPRESSED IN: 14 plant structures; EXPRESSED DURING: 4 anthesis, C globular stage, F mature embryo stage, petal differentiation an
AT1G32130.1	| Symbols: IWS1, ATIWS1 | Transcription elongation factor (TFIIS) family protein | chr1:11559146-11561786 REVERSE LENGTH=502
AT1G32160.1	| Symbols: | Protein of unknown function (DUF760) | chr1:11568701-11570241 FORWARD LENGTH=406
AT1G32200.2	| Symbols: ATS1, ACT1 | phospholipid/glycerol acyltransferase family protein | chr1:11602223-11605001 REVERSE LENGTH=459
AT1G32220.1	| Symbols: | NAD(P)-binding Rossmann-fold superfamily protein | chr1:11608038-11609591 FORWARD LENGTH=296									1	1	1	1
AT1G32380.1	| Symbols: PRS2 | phosphoribosyl pyrophosphate (PRPP) synthase 2 | chr1:11682033-11684229 FORWARD LENGTH=400					9	10	4	6.17	10	10	3	5.41									1	2	0	0.48
AT1G32440.1	| Symbols: PKp3 | plastidial pyruvate kinase 3 | chr1:11712205-11714963 FORWARD LENGTH=571
AT1G32470.1	| Symbols: | Single hybrid motif superfamily protein | chr1:11739479-11740246 REVERSE LENGTH=166
AT1G32490.1	| Symbols: EMB2733, ESP3 | RNA helicase family protein | chr1:11742356-11749286 REVERSE LENGTH=1044									2	2	2	2
AT1G32500.1	| Symbols: ATNAP6, NAP6 | non-intrinsic ABC protein 6 | chr1:11750091-11751994 REVERSE LENGTH=475
AT1G32530.1	| Symbols: | RING/U-box superfamily protein | chr1:11759666-11762386 REVERSE LENGTH=711																																													1	1	1	1
AT1G32580.1	| Symbols: | plastid developmental protein DAG, putative | chr1:11784108-11785430 FORWARD LENGTH=229									1	1	0	0.5	1	1	0	0.29					3	3	0	1.29	1	1	0	0.5	2	2	0	1	3	3	1	2	2	2	0	1	2	2	1	1.5	3	3	1	1.79
AT1G32790.2	| Symbols: CID11 | CTC-interacting domain 11 | chr1:11875028-11877188 REVERSE LENGTH=406
AT1G32850.1	| Symbols: UBP11 | ubiquitin-specific protease 11 | chr1:11902629-11906900 FORWARD LENGTH=892
AT1G32860.1	| Symbols: | Glycosyl hydrolase superfamily protein | chr1:11907308-11908803 REVERSE LENGTH=426													6	10	10	10	3	3	3	3	6	6	6	6
AT1G32930.1	| Symbols: | Galactosyltransferase family protein | chr1:11931980-11934399 REVERSE LENGTH=399
AT1G32960.1	| Symbols: ATSBT3.3, SBT3.3 | Subtilase family protein | chr1:11945351-11948429 FORWARD LENGTH=777													3	3	3	3	2	2	2	2					1	1	1	1	1	1	1	1
AT1G32990.1	| Symbols: PRPL11 | plastid ribosomal protein l11 | chr1:11955827-11957139 FORWARD LENGTH=222	4	4	4	4	3	3	3	3	5	7	7	7	7	9	9	9	7	9	9	9	7	10	10	10	5	5	5	5	6	9	9	9	5	7	7	7	3	3	3	3	4	4	4	4	3	3	3	3
AT1G33030.1	| Symbols: | O-methyltransferase family protein | chr1:11964885-11966212 REVERSE LENGTH=352
AT1G33040.1	| Symbols: NACA5 | nascent polypeptide-associated complex subunit alpha-like protein 5 | chr1:11966547-11967696 FORWARD LENGTH=209					1	1	1	1	1	1	1	1
AT1G33120.1	| Symbols: | Ribosomal protein L6 family | chr1:12010986-12012223 FORWARD LENGTH=194					15	27	22	25.42	16	42	36	40.11	2	2	2	2	1	1	1	1	12	15	11	13.74	5	5	4	4.68	4	4	3	3.68	4	4	3	3.68	10	13	10	12.05	8	9	7	8.37	4	4	4	4
AT1G33360.1	| Symbols: | ATP-dependent Clp protease | chr1:12092111-12095789 FORWARD LENGTH=656									1	1	1	1
AT1G33410.2	| Symbols: SAR1 | SUPPRESSOR OF AUXIN RESISTANCE1 | chr1:12109769-12118828 REVERSE LENGTH=1504
AT1G33470.1	| Symbols: | RNA-binding (RRM/RBD/RNP motifs) family protein | chr1:12144632-12146040 FORWARD LENGTH=245
AT1G33520.1	| Symbols: MOS2 | D111/G-patch domain-containing protein | chr1:12157488-12158876 REVERSE LENGTH=462																									1	1	1	1	1	1	1	1
AT1G33590.1	| Symbols: | Leucine-rich repeat (LRR) family protein | chr1:12177788-12179221 FORWARD LENGTH=477	1	1	1	1	5	5	5	5	8	10	10	10	21	34	32	33.92	17	24	22	23.92	6	6	6	6	22	35	33	34.92	15	18	17	17.96	10	11	11	11	20	34	33	33.96	19	28	27	27.96	18	28	28	28
AT1G33600.1	| Symbols: | Leucine-rich repeat (LRR) family protein | chr1:12180776-12182212 FORWARD LENGTH=478													1	2	0	0.08	1	2	0	0.08					1	2	0	0.08	1	1	0	0.04					1	1	0	0.04	1	1	0	0.04
AT1G33610.1	| Symbols: | Leucine-rich repeat (LRR) family protein | chr1:12188910-12190346 FORWARD LENGTH=478													2	2	2	2	2	2	2	2
AT1G33680.1	| Symbols: | KH domain-containing protein | chr1:12204056-12208282 FORWARD LENGTH=763									1	1	1	1	2	2	2	2					1	1	1	1									1	1	1	1
AT1G33780.1	| Symbols: | Protein of unknown function (DUF179) | chr1:12244799-12246034 REVERSE LENGTH=325
AT1G33790.2	| Symbols: | jacalin lectin family protein | chr1:12256990-12260432 FORWARD LENGTH=745																																													1	1	1	1
AT1G34000.1	| Symbols: OHP2 | one-helix protein 2 | chr1:12358151-12358902 REVERSE LENGTH=172									1	1	1	1
AT1G34020.1	| Symbols: | Nucleotide-sugar transporter family protein | chr1:12367359-12368965 FORWARD LENGTH=335
AT1G34190.1	| Symbols: anac017, NAC017 | NAC domain containing protein 17 | chr1:12451729-12453914 FORWARD LENGTH=557
AT1G34200.1	| Symbols: | Glyceraldehyde-3-phosphate dehydrogenase-like family protein | chr1:12455793-12456935 FORWARD LENGTH=352
AT1G34220.2	| Symbols: | Regulator of Vps4 activity in the MVB pathway protein | chr1:12463102-12465911 REVERSE LENGTH=619									1	1	1	1
AT1G34300.1	| Symbols: | lectin protein kinase family protein | chr1:12503450-12505939 FORWARD LENGTH=829
AT1G34320.1	| Symbols: | Protein of unknown function (DUF668) | chr1:12520713-12524046 FORWARD LENGTH=657
AT1G34340.1	| Symbols: | alpha/beta-Hydrolases superfamily protein | chr1:12530936-12534031 FORWARD LENGTH=530
AT1G34419.1	| Symbols: | unknown protein; Has 30201 Blast hits to 17322 proteins in 780 species: Archae - 12; Bacteria - 1396; Metazoa - 17338; Fungi - 3422; Plants - 5037; Viruses - 0; Other Eukaryotes - 2996 (source: NCBI BLink). | chr1:12583039-12583206 REV
AT1G34430.1	| Symbols: EMB3003 | 2-oxoacid dehydrogenases acyltransferase family protein | chr1:12588027-12590084 REVERSE LENGTH=465	2	2	1	1.49	21	29	23	25.93	21	33	27	29.93									12	17	8	12.4
AT1G34760.1	| Symbols: GRF11, GF14 OMICRON, RHS5 | general regulatory factor 11 | chr1:12744062-12745603 REVERSE LENGTH=255	2	2	0	0	1	1	0	0	1	1	0	0
AT1G35140.1	| Symbols: PHI-1, EXL7 | Phosphate-responsive 1 family protein | chr1:12852089-12853018 FORWARD LENGTH=309					5	6	6	6	11	12	12	12
AT1G35160.1	| Symbols: GRF4, 14-3-3PHI, GF14 PHI | GF14 protein phi chain | chr1:12867264-12868514 FORWARD LENGTH=267	2	2	0	0.18	3	3	0	0.51	4	5	1	1.82
AT1G35190.2	| Symbols: | 2-oxoglutarate (2OG) and Fe(II)-dependent oxygenase superfamily protein | chr1:12890544-12892632 FORWARD LENGTH=306
AT1G35220.1	| Symbols: | unknown protein; FUNCTIONS IN: molecular_function unknown; INVOLVED IN: biological_process unknown; LOCATED IN: cellular_component unknown; EXPRESSED IN: 22 plant structures; EXPRESSED DURING: 13 growth stages; Has 313 Blast hits to 18					1	1	1	1	1	1	1	1
AT1G35310.1	| Symbols: MLP168 | MLP-like protein 168 | chr1:12956428-12957024 REVERSE LENGTH=151																																					1	1	1	1	1	1	1	1	5	5	5	5
AT1G35340.2	| Symbols: | ATP-dependent protease La (LON) domain protein | chr1:12978239-12979749 FORWARD LENGTH=210																									1	1	1	1	1	1	1	1	6	6	6	6	6	6	6	6	2	2	2	2	3	3	3	3
AT1G35420.1	| Symbols: | alpha/beta-Hydrolases superfamily protein | chr1:13026320-13027463 FORWARD LENGTH=310
AT1G35470.2	| Symbols: | SPla/RYanodine receptor (SPRY) domain-containing protein | chr1:13051636-13054922 REVERSE LENGTH=467
AT1G35580.1	| Symbols: CINV1 | cytosolic invertase 1 | chr1:13122460-13124808 REVERSE LENGTH=551					1	2	2	2	9	9	7	8.65									4	4	4	4
AT1G35620.1	| Symbols: ATPDIL5-2, ATPDI8, PDI8, PDIL5-2 | PDI-like 5-2 | chr1:13156504-13158280 FORWARD LENGTH=440					6	6	6	6	6	6	6	6									2	2	2	2
AT1G35660.1	| Symbols: | unknown protein; FUNCTIONS IN: molecular_function unknown; INVOLVED IN: biological_process unknown; LOCATED IN: plasma membrane; EXPRESSED IN: 19 plant structures; EXPRESSED DURING: 11 growth stages; Has 309 Blast hits to 256 proteins									3	4	4	4
AT1G35670.1	| Symbols: ATCDPK2, CPK11, ATCPK11, CDPK2 | calcium-dependent protein kinase 2 | chr1:13205456-13208058 FORWARD LENGTH=495									2	2	2	2
AT1G35680.1	| Symbols: | Ribosomal protein L21 | chr1:13208777-13210246 FORWARD LENGTH=220					2	2	2	2	2	4	4	4
AT1G35720.1	| Symbols: ANNAT1, OXY5, ATOXY5 | annexin 1 | chr1:13225304-13226939 FORWARD LENGTH=317	1	1	1	1	4	4	4	4	5	5	5	5									1	1	1	1
AT1G35780.1	| Symbols: | unknown protein; BEST Arabidopsis thaliana protein match is: unknown protein (TAIR:AT1G78150.2); Has 145 Blast hits to 144 proteins in 16 species: Archae - 0; Bacteria - 0; Metazoa - 0; Fungi - 0; Plants - 145; Viruses - 0; Other Eukar					1	1	1	1					2	2	2	2	3	3	3	3	1	1	1	1	2	2	2	2	2	2	2	2	2	2	2	2	3	3	3	3	3	5	5	5	2	2	2	2
AT1G36160.2	| Symbols: ACC1 | acetyl-CoA carboxylase 1 | chr1:13534196-13543773 FORWARD LENGTH=2254					1	1	0	0.14	7	7	0	0.95									2	2	0	0.27
AT1G36180.1	| Symbols: ACC2 | acetyl-CoA carboxylase 2 | chr1:13546047-13558339 FORWARD LENGTH=2355					14	14	13	13.86	22	25	18	24.05									4	4	2	3.73
AT1G36280.1	| Symbols: | L-Aspartase-like family protein | chr1:13640600-13642908 FORWARD LENGTH=527																	1	1	0	0.5					5	5	3	4	5	5	4	4.5	3	3	2	2.5	11	14	10	12	9	12	11	11.5	8	9	9	9
AT1G36310.1	| Symbols: | S-adenosyl-L-methionine-dependent methyltransferases superfamily protein | chr1:13669644-13670934 FORWARD LENGTH=404
AT1G36320.1	| Symbols: | unknown protein; BEST Arabidopsis thaliana protein match is: unknown protein (TAIR:AT4G37920.1); Has 93 Blast hits to 90 proteins in 22 species: Archae - 0; Bacteria - 0; Metazoa - 0; Fungi - 0; Plants - 85; Viruses - 0; Other Eukaryot
AT1G36370.1	| Symbols: SHM7 | serine hydroxymethyltransferase 7 | chr1:13696240-13698576 REVERSE LENGTH=598													3	3	3	3	2	2	2	2					2	2	2	2	1	1	1	1
AT1G36390.2	| Symbols: | Co-chaperone GrpE family protein | chr1:13701811-13703524 REVERSE LENGTH=279
AT1G36675.1	| Symbols: | glycine-rich protein | chr1:13867568-13869490 FORWARD LENGTH=268
AT1G36730.1	| Symbols: | Translation initiation factor IF2/IF5 | chr1:13898706-13900025 REVERSE LENGTH=439
AT1G37130.1	| Symbols: NIA2, B29, NIA2-1, CHL3, NR, NR2, ATNR2 | nitrate reductase 2 | chr1:14158617-14161652 FORWARD LENGTH=917									1	1	1	1									1	1	1	1
AT1G41830.1	| Symbols: SKS6 | SKU5-similar 6 | chr1:15603892-15607802 REVERSE LENGTH=542	3	3	0	1.12									11	18	9	12.36	7	8	2	4.24	5	7	0	2.61	6	7	3	4.49	2	2	0	0.75	1	1	0	0.38	11	13	10	11.11	9	10	5	6.86	3	3	1	1.74
AT1G41880.1	| Symbols: | Ribosomal protein L35Ae family protein | chr1:15651585-15652427 REVERSE LENGTH=111					4	5	1	2.6	5	12	4	7.2									2	2	1	1.4
AT1G42430.2	| Symbols: | unknown protein; FUNCTIONS IN: molecular_function unknown; INVOLVED IN: biological_process unknown; LOCATED IN: cellular_component unknown; BEST Arabidopsis thaliana protein match is: unknown protein (TAIR:AT3G55760.3). | chr1:15891512
AT1G42440.1	| Symbols: | FUNCTIONS IN: molecular_function unknown; INVOLVED IN: ribosome biogenesis; LOCATED IN: nucleus; EXPRESSED IN: 22 plant structures; EXPRESSED DURING: 13 growth stages; CONTAINS InterPro DOMAIN/s: AARP2CN (InterPro:IPR012948), Protein o					2	2	2	2	11	11	11	11
AT1G42470.1	| Symbols: | Patched family protein | chr1:15926987-15935128 FORWARD LENGTH=1272					2	2	2	2	1	1	1	1													1	1	1	1									1	1	1	1	2	2	2	2	1	1	1	1
AT1G42480.1	| Symbols: | unknown protein; FUNCTIONS IN: molecular_function unknown; INVOLVED IN: biological_process unknown; LOCATED IN: endomembrane system; EXPRESSED IN: 24 plant structures; EXPRESSED DURING: 13 growth stages; CONTAINS InterPro DOMAIN/s: Pro
AT1G42550.1	| Symbols: PMI1 | plastid movement impaired1 | chr1:15977131-15979734 FORWARD LENGTH=843
AT1G42960.1	| Symbols: | expressed protein localized to the inner membrane of the chloroplast. | chr1:16125863-16127080 FORWARD LENGTH=168					1	2	2	2	1	2	2	2									1	1	1	1
AT1G42970.1	| Symbols: GAPB | glyceraldehyde-3-phosphate dehydrogenase B subunit | chr1:16127552-16129584 FORWARD LENGTH=447	2	2	2	2	10	11	10	10.6	13	18	16	17.19	1	1	1	1	1	1	0	0.6	7	7	6	6.6	1	1	0	0.6	1	1	1	1	1	1	1	1	1	2	0	1.19	2	2	1	1.6	1	1	0	0.6
AT1G43080.1	| Symbols: | Pectin lyase-like superfamily protein | chr1:16213995-16215828 REVERSE LENGTH=404
AT1G43130.1	| Symbols: LCV2 | like COV 2 | chr1:16228661-16231158 REVERSE LENGTH=261					1	2	2	2	1	1	1	1
AT1G43170.8	| Symbols: RP1 | ribosomal protein 1 | chr1:16266992-16268631 FORWARD LENGTH=389					29	40	40	40	34	57	57	57									16	19	19	19
AT1G43190.3	| Symbols: PTB3 | polypyrimidine tract-binding protein 3 | chr1:16275432-16278185 REVERSE LENGTH=430					1	1	1	1	1	1	1	1	2	2	2	2					1	1	1	1	2	2	2	2	3	3	3	3	2	2	2	2	2	2	2	2	1	1	1	1
AT1G43560.1	| Symbols: Aty2, ty2 | thioredoxin Y2 | chr1:16398359-16399828 REVERSE LENGTH=167																																	1	1	1	1	1	1	1	1	1	1	1	1	1	1	1	1
AT1G43630.1	| Symbols: | Protein of unknown function (DUF793) | chr1:16436445-16437686 REVERSE LENGTH=413
AT1G43670.1	| Symbols: | Inositol monophosphatase family protein | chr1:16468184-16470347 FORWARD LENGTH=341									1	1	1	1																									1	1	1	1	1	1	1	1	4	4	4	4
AT1G43690.1	| Symbols: | ubiquitin interaction motif-containing protein | chr1:16478519-16482589 FORWARD LENGTH=599									2	2	2	2																																	1	1	1	1
AT1G43700.1	| Symbols: VIP1, SUE3 | VIRE2-interacting protein 1 | chr1:16484352-16486017 FORWARD LENGTH=341					1	1	1	1	1	1	1	1
AT1G43710.1	| Symbols: emb1075 | Pyridoxal phosphate (PLP)-dependent transferases superfamily protein | chr1:16486534-16488298 REVERSE LENGTH=482					1	1	1	1	2	2	2	2
AT1G43800.1	| Symbols: | Plant stearoyl-acyl-carrier-protein desaturase family protein | chr1:16577662-16579549 FORWARD LENGTH=391	2	2	2	2	7	11	11	11	16	36	36	36									6	8	8	8	4	5	4	4.9	5	5	5	5	5	6	6	6	9	12	12	12	4	5	5	5	11	16	16	16
AT1G43850.1	| Symbols: SEU | SEUSS transcriptional co-regulator | chr1:16617872-16621596 FORWARD LENGTH=877																	1	1	1	1	1	1	1	1																	1	1	1	1
AT1G43860.1	| Symbols: | sequence-specific DNA binding transcription factors | chr1:16622244-16624385 REVERSE LENGTH=370
AT1G43890.2	| Symbols: ATRAB18, ATRABC1, RAB18-1, RABC1, ATRAB-C1, RAB18 | RAB GTPASE HOMOLOG B18 | chr1:16646934-16648395 FORWARD LENGTH=212																					9	9	9	9	5	5	5	5	6	6	6	6	4	4	4	4					2	2	2	2
AT1G43900.1	| Symbols: | Protein phosphatase 2C family protein | chr1:16654045-16655810 FORWARD LENGTH=371
AT1G44120.1	| Symbols: | Armadillo/beta-catenin-like repeat ; C2 calcium/lipid-binding domain (CaLB) protein | chr1:16780610-16787414 FORWARD LENGTH=2114
AT1G44170.1	| Symbols: ALDH3H1, ALDH4 | aldehyde dehydrogenase 3H1 | chr1:16796564-16800031 REVERSE LENGTH=484					1	1	1	1
AT1G44575.1	| Symbols: NPQ4, PSBS | Chlorophyll A-B binding family protein | chr1:16871768-16873194 FORWARD LENGTH=265					6	8	8	8	5	6	6	6									1	1	1	1	1	1	1	1
AT1G44780.1	| Symbols: | CONTAINS InterPro DOMAIN/s: Histone chaperone domain CHZ (InterPro:IPR019098); BEST Arabidopsis thaliana protein match is: unknown protein (TAIR:AT4G08310.1); Has 18105 Blast hits to 11200 proteins in 808 species: Archae - 37; Bacteria
AT1G44790.1	| Symbols: | ChaC-like family protein | chr1:16912403-16913582 REVERSE LENGTH=199
AT1G44820.1	| Symbols: | Peptidase M20/M25/M40 family protein | chr1:16926351-16928354 FORWARD LENGTH=438																																													2	2	2	2
AT1G44835.1	| Symbols: | YbaK/aminoacyl-tRNA synthetase-associated domain | chr1:16939909-16942337 FORWARD LENGTH=307									1	1	1	1	1	1	1	1	2	2	2	2	1	1	1	1									2	2	2	2									1	1	1	1
AT1G44890.1	| Symbols: | BEST Arabidopsis thaliana protein match is: homolog of yeast oxidase assembly 1 (OXA1) (TAIR:AT5G62050.1); Has 40 Blast hits to 40 proteins in 7 species: Archae - 0; Bacteria - 0; Metazoa - 0; Fungi - 0; Plants - 39; Viruses - 0; Other
AT1G44900.2	| Symbols: MCM2 | minichromosome maintenance (MCM2/3/5) family protein | chr1:16970291-16974457 FORWARD LENGTH=934									2	2	2	2
AT1G44910.2	| Symbols: ATPRP40A, PRP40A | pre-mRNA-processing protein 40A | chr1:16975930-16982647 FORWARD LENGTH=926					1	1	1	1	1	1	1	1
AT1G45000.1	| Symbols: | AAA-type ATPase family protein | chr1:17009220-17011607 FORWARD LENGTH=399	1	1	0	0.05	9	13	2	7.5	19	26	2	13.55									6	7	1	4
AT1G45050.1	| Symbols: ATUBC2-1, UBC15 | Ubiquitin-conjugating enzyme family protein | chr1:17031337-17032967 FORWARD LENGTH=161	1	1	1	1
AT1G45145.1	| Symbols: ATTRX5, ATH5, LIV1, TRX5 | thioredoxin H-type 5 | chr1:17075264-17076256 REVERSE LENGTH=118									2	3	3	3	9	11	11	11	6	8	8	8	12	26	26	26	15	22	22	22	10	18	18	18	6	9	9	9	3	3	3	3	3	6	6	6	2	2	2	2
AT1G45150.1	| Symbols: | unknown protein; Has 219 Blast hits to 202 proteins in 78 species: Archae - 0; Bacteria - 166; Metazoa - 0; Fungi - 0; Plants - 36; Viruses - 0; Other Eukaryotes - 17 (source: NCBI BLink). | chr1:17077615-17082330 REVERSE LENGTH=643
AT1G45231.2	| Symbols: | S-adenosyl-L-methionine-dependent methyltransferases superfamily protein | chr1:17148019-17151194 REVERSE LENGTH=538
AT1G45249.2	| Symbols: ABF2, AREB1, ATAREB1 | abscisic acid responsive elements-binding factor 2 | chr1:17166189-17167415 REVERSE LENGTH=408																																									1	1	1	1
AT1G45332.1	| Symbols: | Translation elongation factor EFG/EF2 protein | chr1:17172507-17176683 REVERSE LENGTH=754									9	11	2	6.85									1	2	0	1.08									1	1	0	0.54	1	1	0	0.54	2	2	0	1.08	3	6	0	3.23
AT1G45688.1	| Symbols: | unknown protein; FUNCTIONS IN: molecular_function unknown; INVOLVED IN: biological_process unknown; LOCATED IN: plasma membrane; EXPRESSED IN: 22 plant structures; EXPRESSED DURING: 13 growth stages; BEST Arabidopsis thaliana protein m					1	1	1	1	2	2	2	2
AT1G47128.1	| Symbols: RD21, RD21A | Granulin repeat cysteine protease family protein | chr1:17283139-17285609 REVERSE LENGTH=462					1	1	0	0.53	1	1	1	1
AT1G47200.1	| Symbols: WPP2 | WPP domain protein 2 | chr1:17298181-17298723 REVERSE LENGTH=180									1	1	0	0.82
AT1G47240.1	| Symbols: NRAMP2, ATNRAMP2 | NRAMP metal ion transporter 2 | chr1:17309043-17311308 REVERSE LENGTH=530					1	1	1	1
AT1G47250.1	| Symbols: PAF2 | 20S proteasome alpha subunit F2 | chr1:17319220-17320900 FORWARD LENGTH=277					2	2	0	0.78	2	2	0	0.78																	1	1	0	0.39
AT1G47260.1	| Symbols: APFI, GAMMA CA2 | gamma carbonic anhydrase 2 | chr1:17321384-17323347 REVERSE LENGTH=278					12	14	10	12.71	8	9	7	8.38									2	3	1	2.43	2	2	1	1.71					2	2	1	1.71
AT1G47290.2	| Symbols: AT3BETAHSD/D1, 3BETAHSD/D1 | 3beta-hydroxysteroid-dehydrogenase/decarboxylase isoform 1 | chr1:17336121-17339030 FORWARD LENGTH=439					1	1	1	1
AT1G47340.1	| Symbols: | F-box and associated interaction domains-containing protein | chr1:17354123-17356494 REVERSE LENGTH=459
AT1G47420.1	| Symbols: SDH5 | succinate dehydrogenase 5 | chr1:17395774-17397176 REVERSE LENGTH=257					8	9	9	9	6	8	8	8									1	1	1	1
AT1G47490.1	| Symbols: ATRBP47C, RBP47C | RNA-binding protein 47C | chr1:17424801-17427182 FORWARD LENGTH=432
AT1G47495.1	| Symbols: | unknown protein; BEST Arabidopsis thaliana protein match is: unknown protein (TAIR:AT2G45403.1); Has 2 Blast hits to 2 proteins in 1 species: Archae - 0; Bacteria - 0; Metazoa - 0; Fungi - 0; Plants - 2; Viruses - 0; Other Eukaryotes -
AT1G47500.1	| Symbols: ATRBP47C', RBP47C' | RNA-binding protein 47C' | chr1:17432682-17434805 FORWARD LENGTH=434
AT1G47670.1	| Symbols: | Transmembrane amino acid transporter family protein | chr1:17536834-17539486 REVERSE LENGTH=519					1	1	1	1
AT1G47710.1	| Symbols: | Serine protease inhibitor (SERPIN) family protein | chr1:17558271-17560061 FORWARD LENGTH=391																																													21	28	28	28
AT1G47720.1	| Symbols: OSB1 | Primosome PriB/single-strand DNA-binding | chr1:17561514-17562859 REVERSE LENGTH=261
AT1G47830.1	| Symbols: | SNARE-like superfamily protein | chr1:17613346-17614784 REVERSE LENGTH=142
AT1G47840.1	| Symbols: HXK3 | hexokinase 3 | chr1:17616243-17618859 REVERSE LENGTH=493					1	1	0	0.71
AT1G47900.2	| Symbols: | Plant protein of unknown function (DUF869) | chr1:17647340-17651035 REVERSE LENGTH=1052
AT1G47960.1	| Symbols: C/VIF1, ATC/VIF1 | cell wall / vacuolar inhibitor of fructosidase 1 | chr1:17681954-17683516 REVERSE LENGTH=205													1	1	1	1	1	1	1	1	2	2	2	2					1	1	1	1
AT1G47970.1	| Symbols: | unknown protein; FUNCTIONS IN: molecular_function unknown; INVOLVED IN: biological_process unknown; LOCATED IN: cytosol; EXPRESSED IN: 21 plant structures; EXPRESSED DURING: 11 growth stages; Has 93717 Blast hits to 40765 proteins in 1
AT1G48030.2	| Symbols: mtLPD1 | mitochondrial lipoamide dehydrogenase 1 | chr1:17717432-17719141 REVERSE LENGTH=507					12	14	9	11.45	22	32	23	27.41									7	8	5	6.47	2	2	1	1.49	1	1	1	1	15	18	13	15.45	23	33	21	26.88	21	30	21	25.41	22	36	25	30.39
AT1G48050.1	| Symbols: KU80, ATKU80 | Ku80 family protein | chr1:17723498-17726859 FORWARD LENGTH=680					3	3	3	3	5	5	5	5																													1	1	1	1
AT1G48090.1	| Symbols: | calcium-dependent lipid-binding family protein | chr1:17732582-17758194 REVERSE LENGTH=4146					5	5	5	5	8	8	8	8									1	1	1	1
AT1G48110.1	| Symbols: ECT7 | evolutionarily conserved C-terminal region 7 | chr1:17770339-17772806 REVERSE LENGTH=639																					1	1	1	1	2	4	4	4					4	5	5	5	3	3	3	3	5	6	6	6	3	3	3	3
AT1G48120.1	| Symbols: | hydrolases;protein serine/threonine phosphatases | chr1:17774238-17779624 REVERSE LENGTH=1340
AT1G48160.1	| Symbols: | signal recognition particle 19 kDa protein, putative / SRP19, putative | chr1:17786779-17788286 REVERSE LENGTH=145
AT1G48170.1	| Symbols: | unknown protein; Has 78 Blast hits to 78 proteins in 34 species: Archae - 0; Bacteria - 0; Metazoa - 30; Fungi - 0; Plants - 48; Viruses - 0; Other Eukaryotes - 0 (source: NCBI BLink). | chr1:17788810-17789635 FORWARD LENGTH=153													1	1	1	1	1	1	1	1	1	1	1	1	1	1	1	1					4	4	4	4	2	2	2	2	1	1	1	1
AT1G48200.1	| Symbols: | unknown protein; FUNCTIONS IN: molecular_function unknown; INVOLVED IN: biological_process unknown; LOCATED IN: endomembrane system; EXPRESSED IN: 22 plant structures; EXPRESSED DURING: 13 growth stages; Has 30 Blast hits to 30 protein					1	1	1	1	1	1	1	1
AT1G48210.2	| Symbols: | Protein kinase superfamily protein | chr1:17799551-17801798 FORWARD LENGTH=363													5	6	5	5.88	6	6	6	6	5	5	4	4.88
AT1G48240.1	| Symbols: ATNPSN12, NPSN12 | novel plant snare 12 | chr1:17809223-17811656 REVERSE LENGTH=265													1	1	1	1									1	1	1	1	1	1	1	1	1	1	1	1
AT1G48280.1	| Symbols: | hydroxyproline-rich glycoprotein family protein | chr1:17835196-17837553 FORWARD LENGTH=558																																	1	1	1	1
AT1G48320.1	| Symbols: | Thioesterase superfamily protein | chr1:17855024-17855577 REVERSE LENGTH=156	3	4	4	4									3	4	4	4	2	2	2	2	4	5	5	5
AT1G48350.1	| Symbols: | Ribosomal L18p/L5e family protein | chr1:17867269-17868215 FORWARD LENGTH=170					1	1	1	1	1	1	1	1
AT1G48360.1	| Symbols: | zinc ion binding;nucleic acid binding;hydrolases, acting on acid anhydrides, in phosphorus-containing anhydrides | chr1:17868661-17872436 FORWARD LENGTH=746
AT1G48410.2	| Symbols: AGO1 | Stabilizer of iron transporter SufD / Polynucleotidyl transferase | chr1:17886285-17891892 REVERSE LENGTH=1050					6	7	7	7	10	11	11	11	8	10	7	9.86	8	10	10	10	3	3	3	3	9	11	9	10.91	7	8	8	8	4	5	5	5	11	15	13	14.91	9	9	9	9	11	14	13	13.95
AT1G48420.1	| Symbols: D-CDES, ATACD1, ACD1 | D-cysteine desulfhydrase | chr1:17896767-17898803 REVERSE LENGTH=401					1	1	1	1	1	2	2	2																									7	7	7	7	4	4	4	4	9	10	10	10
AT1G48440.1	| Symbols: | B-cell receptor-associated 31-like | chr1:17907075-17908327 FORWARD LENGTH=129					1	1	1	1	1	1	1	1									1	1	1	1
AT1G48450.3	| Symbols: | Protein of unknown function (DUF760) | chr1:17908658-17910345 REVERSE LENGTH=333
AT1G48470.1	| Symbols: GLN1;5 | glutamine synthetase 1;5 | chr1:17913784-17915926 FORWARD LENGTH=353																									1	1	1	1	1	1	1	1	3	3	1	1.13	3	7	0	0.46	3	8	2	2.4	3	9	0	0.6
AT1G48480.1	| Symbols: RKL1 | receptor-like kinase 1 | chr1:17918475-17920743 FORWARD LENGTH=655					2	2	1	1.48	2	2	2	2
AT1G48520.1	| Symbols: GATB | GLU-ADT subunit B | chr1:17940185-17942540 FORWARD LENGTH=550	1	1	1	1									5	6	6	6	2	2	2	2	3	3	3	3																	3	3	3	3	6	6	6	6
AT1G48570.1	| Symbols: | zinc finger (Ran-binding) family protein | chr1:17955455-17957661 REVERSE LENGTH=455									7	9	9	9																													1	1	1	1
AT1G48590.3	| Symbols: | Calcium-dependent lipid-binding (CaLB domain) family protein | chr1:17962886-17964274 FORWARD LENGTH=168
AT1G48600.2	| Symbols: PMEAMT, AtPMEAMT | S-adenosyl-L-methionine-dependent methyltransferases superfamily protein | chr1:17966074-17969077 FORWARD LENGTH=491																																													2	2	0	0.81
AT1G48605.1	| Symbols: ATHAL3B, HAL3B, HAL3 | Flavoprotein | chr1:17969395-17970080 REVERSE LENGTH=201
AT1G48610.1	| Symbols: | AT hook motif-containing protein | chr1:17971027-17972798 REVERSE LENGTH=212					3	3	3	3	1	1	1	1									1	1	1	1
AT1G48630.1	| Symbols: RACK1B_AT | receptor for activated C kinase 1B | chr1:17981977-17983268 REVERSE LENGTH=326	7	7	2	4.53	12	16	5	10.32	17	24	7	16.32	21	42	16	31.32	19	30	10	20.51	20	42	19	31.91	20	36	14	26.25	17	29	12	21.32	18	32	12	23.32	12	12	6	9.19	13	15	5	10.86	10	12	4	8.12
AT1G48635.1
AT1G48650.2	| Symbols: | DEA(D/H)-box RNA helicase family protein | chr1:17989517-17995169 REVERSE LENGTH=1206									1	1	1	1
AT1G48700.1	| Symbols: | 2-oxoglutarate (2OG) and Fe(II)-dependent oxygenase superfamily protein | chr1:18011285-18012823 REVERSE LENGTH=291
AT1G48760.3	| Symbols: delta-ADR | delta-adaptin | chr1:18036652-18039261 REVERSE LENGTH=869
AT1G48790.1	| Symbols: AMSH1 | associated molecule with the SH3 domain of STAM 1 | chr1:18043925-18047427 REVERSE LENGTH=507
AT1G48830.1	| Symbols: | Ribosomal protein S7e family protein | chr1:18059854-18060935 REVERSE LENGTH=191					9	10	10	10	12	21	21	21									5	8	8	8
AT1G48850.1	| Symbols: EMB1144 | chorismate synthase, putative / 5-enolpyruvylshikimate-3-phosphate phospholyase, putative | chr1:18065154-18067956 REVERSE LENGTH=436
AT1G48860.1	| Symbols: | RNA 3'-terminal phosphate cyclase/enolpyruvate transferase, alpha/beta | chr1:18068892-18071331 REVERSE LENGTH=521									4	4	2	2.92																									1	1	0	0.46	2	3	2	2.46	16	21	7	13.46
AT1G48900.2	| Symbols: | Signal recognition particle, SRP54 subunit protein | chr1:18085031-18087743 REVERSE LENGTH=431	13	13	8	12.87	1	1	0	0.97	2	2	1	1.97	39	46	36	45.74	32	41	29	40.69	33	40	29	39.72	11	12	9	11.92	9	10	7	9.92	17	19	11	18.79	2	2	1	1.97	3	3	2	2.97	4	4	2	3.95
AT1G48920.1	| Symbols: ATNUC-L1, PARL1, NUC-L1 | nucleolin like 1 | chr1:18098186-18101422 FORWARD LENGTH=557					4	5	5	5	7	8	8	8					2	2	2	2	2	2	2	2	3	3	3	3	3	3	3	3	2	2	2	2	4	4	4	4	3	4	4	4	1	1	1	1
AT1G48940.1	| Symbols: ENODL6, AtENODL6 | early nodulin-like protein 6 | chr1:18105808-18106422 REVERSE LENGTH=177	3	3	3	3	2	2	2	2					2	2	2	2	1	1	1	1
AT1G48950.1	| Symbols: | C3HC zinc finger-like | chr1:18107063-18110108 FORWARD LENGTH=594
AT1G48970.1	| Symbols: | NagB/RpiA/CoA transferase-like superfamily protein | chr1:18113868-18117547 REVERSE LENGTH=666
AT1G49040.3	| Symbols: SCD1 | stomatal cytokinesis defective / SCD1 protein (SCD1) | chr1:18140457-18148826 REVERSE LENGTH=1040					2	2	2	2	1	1	1	1
AT1G49140.1	| Symbols: | Complex I subunit NDUFS6 | chr1:18177696-18178269 REVERSE LENGTH=107					2	2	1	1.5	1	1	0	0.5
AT1G49190.2	| Symbols: RR19 | response regulator 19 | chr1:18191342-18193598 FORWARD LENGTH=622
AT1G49240.1	| Symbols: ACT8 | actin 8 | chr1:18216539-18217947 FORWARD LENGTH=377	6	6	0	0.56	11	15	0	2.94	15	23	0	5.61									8	11	0	1.63					1	1	0	0.05	1	1	0	0.05
AT1G49300.1	| Symbols: ATRAB7, ATRABG3E, RABG3E | RAB GTPase homolog G3E | chr1:18234842-18236968 FORWARD LENGTH=206					1	1	0	0.33	1	1	0	0.33																									1	1	0	0.33
AT1G49320.1	| Symbols: ATUSPL1, USPL1 | unknown seed protein like 1 | chr1:18246441-18247817 FORWARD LENGTH=280	2	2	2	2									2	2	2	2	1	1	1	1
AT1G49340.2	| Symbols: ATPI4K ALPHA | Phosphatidylinositol 3- and 4-kinase family protein | chr1:18252355-18263967 FORWARD LENGTH=2028
AT1G49400.1	| Symbols: emb1129 | Nucleic acid-binding, OB-fold-like protein | chr1:18283156-18283643 FORWARD LENGTH=116									1	1	1	1
AT1G49410.1	| Symbols: TOM6 | translocase of the outer mitochondrial membrane 6 | chr1:18286738-18286902 REVERSE LENGTH=54					1	1	1	1	3	3	3	3
AT1G49520.1	| Symbols: | SWIB complex BAF60b domain-containing protein | chr1:18329736-18331691 FORWARD LENGTH=372
AT1G49540.1	| Symbols: ELP2, AtELP2 | elongator protein 2 | chr1:18333767-18337382 REVERSE LENGTH=838
AT1G49560.1	| Symbols: | Homeodomain-like superfamily protein | chr1:18342725-18344101 FORWARD LENGTH=333																					1	1	1	1
AT1G49590.1	| Symbols: | C2H2 and C2HC zinc fingers superfamily protein | chr1:18354997-18356409 FORWARD LENGTH=242													1	2	2	2
AT1G49600.1	| Symbols: ATRBP47A, RBP47A | RNA-binding protein 47A | chr1:18357236-18360150 REVERSE LENGTH=445																																													1	2	2	2
AT1G49630.3	| Symbols: ATPREP2, PREP2 | presequence protease 2 | chr1:18368405-18375336 REVERSE LENGTH=1080
AT1G49650.1	| Symbols: | alpha/beta-Hydrolases superfamily protein | chr1:18377363-18378487 REVERSE LENGTH=374
AT1G49660.1	| Symbols: AtCXE5, CXE5 | carboxyesterase 5 | chr1:18378777-18379736 REVERSE LENGTH=319
AT1G49670.1	| Symbols: NQR | ARP protein (REF) | chr1:18381591-18386021 REVERSE LENGTH=629									1	1	1	1
AT1G49710.1	| Symbols: FUT12, ATFUT12, FUCTB, FUCT2 | fucosyltransferase 12 | chr1:18391622-18393769 REVERSE LENGTH=513
AT1G49740.1	| Symbols: | PLC-like phosphodiesterases superfamily protein | chr1:18407728-18409468 FORWARD LENGTH=359													6	6	6	6	3	3	3	3	3	3	3	3					2	2	2	2
AT1G49750.1	| Symbols: | Leucine-rich repeat (LRR) family protein | chr1:18411177-18412779 REVERSE LENGTH=494					1	1	1	1	1	1	1	1
AT1G49760.1	| Symbols: PAB8, PABP8 | poly(A) binding protein 8 | chr1:18416740-18419753 FORWARD LENGTH=671	3	4	4	4	6	7	6	6.34	4	4	4	4	6	7	7	7	6	6	6	6	5	5	5	5	6	8	8	8	4	4	4	4	4	4	4	4	17	19	16	17.25	17	19	18	18.57	13	16	14	14.9
AT1G49820.1	| Symbols: ATMTK, MTK | S-methyl-5-thioribose kinase | chr1:18443005-18444907 FORWARD LENGTH=420
AT1G49890.1	| Symbols: QWRF2 | Family of unknown function (DUF566) | chr1:18470282-18473463 FORWARD LENGTH=659
AT1G49910.1	| Symbols: BUB3.2 | Transducin/WD40 repeat-like superfamily protein | chr1:18479025-18481271 FORWARD LENGTH=339	2	2	0	0.36									5	5	1	1.73	5	5	0	0.91	4	6	1	1.91	1	1	0	0.18	1	1	0	0.18
AT1G49920.1	| Symbols: | MuDR family transposase | chr1:18481798-18484233 REVERSE LENGTH=785	1	1	1	1													1	1	1	1
AT1G49970.1	| Symbols: CLPR1, NCLPP5, SVR2 | CLP protease proteolytic subunit 1 | chr1:18501936-18504462 REVERSE LENGTH=387
AT1G49990.1	| Symbols: | F-box family protein | chr1:18513696-18514988 FORWARD LENGTH=430
AT1G50010.1	| Symbols: TUA2 | tubulin alpha-2 chain | chr1:18517737-18519729 FORWARD LENGTH=450	7	8	0	1.49	20	27	0	6.43	28	46	1	12.34					2	2	0	0.5	25	36	2	10.23	1	1	0	0.4	4	4	0	1.01	4	4	0	0.71	2	2	0	0.5	1	2	0	0.2	2	2	0	0.21
AT1G50050.1	| Symbols: | CAP (Cysteine-rich secretory proteins, Antigen 5, and Pathogenesis-related 1 protein) superfamily protein | chr1:18546165-18549046 FORWARD LENGTH=226
AT1G50110.1	| Symbols: | D-aminoacid aminotransferase-like PLP-dependent enzymes superfamily protein | chr1:18558203-18560219 REVERSE LENGTH=356																																					3	3	3	3	2	4	4	4	10	16	16	16
AT1G50140.1	| Symbols: | P-loop containing nucleoside triphosphate hydrolases superfamily protein | chr1:18569921-18578663 REVERSE LENGTH=1003					2	2	1	1.57	2	2	2	2
AT1G50170.1	| Symbols: ATSIRB, SIRB | sirohydrochlorin ferrochelatase B | chr1:18582087-18583514 FORWARD LENGTH=225
AT1G50200.1	| Symbols: ALATS, ACD | Alanyl-tRNA synthetase | chr1:18591429-18598311 REVERSE LENGTH=1003					2	2	0	0.67	12	12	1	4.67	1	1	0	0.33	1	1	0	0.33	2	3	0	1	2	2	0	0.67	1	1	0	0.33													12	13	0	4.33
AT1G50200.2	| Symbols: ALATS | Alanyl-tRNA synthetase | chr1:18591429-18598167 REVERSE LENGTH=963					2	2	0	1.33	11	11	0	7.33	1	1	0	0.67	1	1	0	0.67	2	3	0	2	2	2	0	1.33	1	1	0	0.67													12	13	0	8.67
AT1G50260.2	| Symbols: NTMC2T5.1 | N-terminal-transmembrane-C2 domain type 5.1 | chr1:18618255-18621643 REVERSE LENGTH=634
AT1G50300.1	| Symbols: TAF15 | TBP-associated factor 15 | chr1:18628818-18631662 REVERSE LENGTH=372
AT1G50320.1	| Symbols: ATHX, ATX, THX | thioredoxin X | chr1:18638606-18639464 REVERSE LENGTH=182													1	1	1	1	1	1	1	1	4	10	10	10	4	5	5	5	5	11	11	11	1	1	1	1
AT1G50360.1	| Symbols: VIIIA, ATVIIIA | P-loop containing nucleoside triphosphate hydrolases superfamily protein | chr1:18650688-18657106 FORWARD LENGTH=1153					1	1	1	1
AT1G50370.1	| Symbols: | Calcineurin-like metallo-phosphoesterase superfamily protein | chr1:18658894-18661672 FORWARD LENGTH=303									1	1	0	0.5
AT1G50380.1	| Symbols: | Prolyl oligopeptidase family protein | chr1:18662480-18666185 FORWARD LENGTH=710																																					14	16	16	16	14	16	16	16	38	52	52	52
AT1G50430.2	| Symbols: DWF5, PA, LE, ST7R, 7RED | Ergosterol biosynthesis ERG4/ERG24 family | chr1:18682175-18685555 REVERSE LENGTH=431					1	1	1	1													1	1	1	1
AT1G50440.3	| Symbols: | RING/FYVE/PHD zinc finger superfamily protein | chr1:18686099-18687646 FORWARD LENGTH=250
AT1G50480.1	| Symbols: THFS | 10-formyltetrahydrofolate synthetase | chr1:18702064-18704687 FORWARD LENGTH=634					22	30	30	30	24	34	34	34									6	7	7	7													1	1	1	1
AT1G50490.1	| Symbols: UBC20 | ubiquitin-conjugating enzyme 20 | chr1:18705005-18706303 REVERSE LENGTH=180													1	1	1	1	1	1	1	1	2	2	2	2	1	1	1	1	1	1	1	1
AT1G50500.1	| Symbols: HIT1, ATVPS53, VPS53 | Membrane trafficking VPS53 family protein | chr1:18708217-18715597 REVERSE LENGTH=828
AT1G50510.1	| Symbols: | indigoidine synthase A family protein | chr1:18716578-18719060 FORWARD LENGTH=330													11	12	12	12	9	10	10	10	12	15	15	15	8	8	8	8	8	9	9	9	2	2	2	2					1	1	1	1
AT1G50570.2	| Symbols: | Calcium-dependent lipid-binding (CaLB domain) family protein | chr1:18726400-18727566 REVERSE LENGTH=388
AT1G50600.1	| Symbols: SCL5 | scarecrow-like 5 | chr1:18737398-18739547 REVERSE LENGTH=597
AT1G50670.1	| Symbols: | OTU-like cysteine protease family protein | chr1:18775086-18776552 REVERSE LENGTH=208																																													6	9	9	9
AT1G50710.1	| Symbols: | unknown protein; Has 109 Blast hits to 109 proteins in 44 species: Archae - 0; Bacteria - 2; Metazoa - 61; Fungi - 8; Plants - 36; Viruses - 0; Other Eukaryotes - 2 (source: NCBI BLink). | chr1:18784719-18787615 REVERSE LENGTH=423
AT1G50840.1	| Symbols: POLGAMMA2 | polymerase gamma 2 | chr1:18839277-18844313 FORWARD LENGTH=1050
AT1G50900.1	| Symbols: GDC1 | Ankyrin repeat family protein | chr1:18866272-18867014 FORWARD LENGTH=175
AT1G50920.1	| Symbols: | Nucleolar GTP-binding protein | chr1:18870555-18872570 FORWARD LENGTH=671					6	6	6	6	8	8	8	8
AT1G50940.1	| Symbols: ETFALPHA | electron transfer flavoprotein alpha | chr1:18878038-18879939 REVERSE LENGTH=363																																													2	3	3	3
AT1G51070.2	| Symbols: bHLH115 | basic helix-loop-helix (bHLH) DNA-binding superfamily protein | chr1:18928018-18929513 FORWARD LENGTH=292																																									1	1	1	1
AT1G51100.1	| Symbols: | unknown protein; FUNCTIONS IN: molecular_function unknown; INVOLVED IN: biological_process unknown; LOCATED IN: chloroplast, chloroplast stroma; EXPRESSED IN: 22 plant structures; EXPRESSED DURING: 13 growth stages; Has 26 Blast hits t													7	7	7	7	6	6	6	6	4	4	4	4
AT1G51150.1	| Symbols: DegP6 | DegP protease 6 | chr1:18948370-18949290 REVERSE LENGTH=219					1	1	1	1
AT1G51160.1	| Symbols: | SNARE-like superfamily protein | chr1:18950057-18951560 FORWARD LENGTH=169													2	2	2	2	1	1	1	1	1	1	1	1
AT1G51200.1	| Symbols: | A20/AN1-like zinc finger family protein | chr1:18985690-18986211 FORWARD LENGTH=173													1	1	1	1	1	1	1	1	1	1	1	1	1	1	1	1	2	2	2	2	1	1	1	1
AT1G51360.1	| Symbols: ATDABB1, DABB1 | dimeric A/B barrel domainS-protein 1 | chr1:19044208-19044840 FORWARD LENGTH=210
AT1G51390.1	| Symbols: NFU5, ATNFU1 | NFU domain protein 5 | chr1:19050427-19051753 FORWARD LENGTH=275
AT1G51402.1	| Symbols: | unknown protein; FUNCTIONS IN: molecular_function unknown; INVOLVED IN: biological_process unknown; LOCATED IN: endomembrane system; Has 30201 Blast hits to 17322 proteins in 780 species: Archae - 12; Bacteria - 1396; Metazoa - 17338;																																	1	1	1	1
AT1G51420.1	| Symbols: ATSPP1, SPP1 | sucrose-phosphatase 1 | chr1:19064852-19066704 REVERSE LENGTH=423																					2	2	0	0.12	2	3	0	0.18	3	5	0	0.29	3	6	0	0.35	2	2	0	0.12	2	2	0	0.12
AT1G51450.1	| Symbols: TRO | TRAUCO | chr1:19074399-19076220 FORWARD LENGTH=509
AT1G51480.1	| Symbols: | Disease resistance protein (CC-NBS-LRR class) family | chr1:19090847-19094306 REVERSE LENGTH=941
AT1G51500.1	| Symbols: CER5, D3, ABCG12, WBC12, ATWBC12 | ABC-2 type transporter family protein | chr1:19097967-19100972 REVERSE LENGTH=687
AT1G51510.1	| Symbols: Y14 | RNA-binding (RRM/RBD/RNP motifs) family protein | chr1:19103072-19104753 REVERSE LENGTH=202									1	1	1	1
AT1G51560.1	| Symbols: | Pyridoxamine 5'-phosphate oxidase family protein | chr1:19119900-19121859 REVERSE LENGTH=392					1	1	1	1	1	1	1	1
AT1G51570.1	| Symbols: | Calcium-dependent lipid-binding (CaLB domain) plant phosphoribosyltransferase family protein | chr1:19122358-19124688 REVERSE LENGTH=776	4	4	3	3.44	1	1	0	0.44	1	1	0	0.44	4	4	2	2.89	3	3	2	2.44	3	3	2	2.44
AT1G51580.1	| Symbols: | RNA-binding KH domain-containing protein | chr1:19125612-19128102 FORWARD LENGTH=621									1	1	1	1
AT1G51630.1	| Symbols: | O-fucosyltransferase family protein | chr1:19142141-19144082 REVERSE LENGTH=423					1	1	1	1	1	1	1	1	3	4	3	3.8	1	1	1	1	2	2	2	2									1	2	2	2
AT1G51650.1	| Symbols: | ATP synthase epsilon chain, mitochondrial | chr1:19152680-19153641 FORWARD LENGTH=70									1	1	1	1
AT1G51680.3	| Symbols: 4CL1, 4CL.1, AT4CL1 | 4-coumarate:CoA ligase 1 | chr1:19159080-19161464 REVERSE LENGTH=539
AT1G51690.1	| Symbols: ATB ALPHA, B ALPHA | protein phosphatase 2A 55 kDa regulatory subunit B alpha isoform | chr1:19166218-19169974 FORWARD LENGTH=513
AT1G51710.1	| Symbols: UBP6, ATUBP6 | ubiquitin-specific protease 6 | chr1:19175805-19179894 REVERSE LENGTH=482									1	1	1	1																									6	6	4	5.7	7	8	5	7.55	16	24	21	23.55
AT1G51730.1	| Symbols: | Ubiquitin-conjugating enzyme family protein | chr1:19186812-19188638 REVERSE LENGTH=252
AT1G51760.1	| Symbols: IAR3, JR3 | peptidase M20/M25/M40 family protein | chr1:19199562-19201424 FORWARD LENGTH=440													1	1	1	1	2	2	2	2	4	4	4	4	1	1	1	1	1	1	1	1	5	5	5	5	1	1	1	1					3	3	3	3
AT1G51850.1	| Symbols: | Leucine-rich repeat protein kinase family protein | chr1:19252964-19256783 REVERSE LENGTH=865																									1	1	1	1					1	1	1	1
AT1G51900.1	| Symbols: | Regulator of Vps4 activity in the MVB pathway protein | chr1:19279884-19282895 REVERSE LENGTH=774																																													1	1	1	1
AT1G51980.2	| Symbols: | Insulinase (Peptidase family M16) protein | chr1:19323929-19326771 REVERSE LENGTH=451					16	27	19	25.59	12	19	12	17.76									2	2	1	1.82									1	1	0	0.82									1	1	0	0.82
AT1G52130.1	| Symbols: | Mannose-binding lectin superfamily protein | chr1:19400619-19402363 REVERSE LENGTH=483
AT1G52160.1	| Symbols: TRZ3 | tRNAse Z3 | chr1:19420911-19424419 REVERSE LENGTH=890
AT1G52240.1	| Symbols: ATROPGEF11, ROPGEF11, PIRF1 | RHO guanyl-nucleotide exchange factor 11 | chr1:19455766-19459235 REVERSE LENGTH=607
AT1G52260.1	| Symbols: ATPDIL1-5, ATPDI3, PDI3, PDIL1-5 | PDI-like 1-5 | chr1:19460694-19463346 FORWARD LENGTH=537
AT1G52280.1	| Symbols: AtRABG3d, RABG3d | RAB GTPase homolog G3D | chr1:19468150-19469449 REVERSE LENGTH=206					1	1	0	0.33	1	1	0	0.33																									1	1	0	0.33
AT1G52290.1	| Symbols: | Protein kinase superfamily protein | chr1:19470251-19472362 REVERSE LENGTH=509
AT1G52300.1	| Symbols: | Zinc-binding ribosomal protein family protein | chr1:19475213-19476152 REVERSE LENGTH=95									1	1	1	1
AT1G52340.1	| Symbols: ABA2, SIS4, GIN1, SDR1, ISI4, SRE1, ATABA2, ATSDR1 | NAD(P)-binding Rossmann-fold superfamily protein | chr1:19489997-19491527 REVERSE LENGTH=285
AT1G52360.2	| Symbols: | Coatomer, beta' subunit | chr1:19499420-19505397 FORWARD LENGTH=970					2	2	0	0.65	8	9	1	4.34									3	5	0	1.62					1	1	0	0.32
AT1G52370.1	| Symbols: | Ribosomal protein L22p/L17e family protein | chr1:19507052-19508699 FORWARD LENGTH=269					3	3	1	2	1	1	0	0.5
AT1G52380.1	| Symbols: | NUP50 (Nucleoporin 50 kDa) protein | chr1:19509979-19511301 FORWARD LENGTH=440	7	12	12	12									7	15	15	15	6	11	11	11	5	13	13	13	2	2	2	2	2	2	2	2
AT1G52400.3	| Symbols: BGLU18 | beta glucosidase 18 | chr1:19515250-19517930 FORWARD LENGTH=528													3	3	3	3	1	1	1	1	2	2	2	2	10	11	11	11	5	5	5	5	1	1	1	1					1	1	1	1
AT1G52500.2	| Symbols: FPG-1, ATFPG-1, ATMMH-1, MMH-1 | MUTM homolog-1 | chr1:19560043-19562855 FORWARD LENGTH=390
AT1G52520.1	| Symbols: FRS6 | FAR1-related sequence 6 | chr1:19565933-19568248 FORWARD LENGTH=703
AT1G52620.1	| Symbols: | Pentatricopeptide repeat (PPR) superfamily protein | chr1:19603828-19606287 FORWARD LENGTH=819
AT1G52650.1	| Symbols: | F-box/RNI-like superfamily protein | chr1:19610643-19612417 FORWARD LENGTH=507
AT1G52670.1	| Symbols: | Single hybrid motif superfamily protein | chr1:19615119-19617420 REVERSE LENGTH=274	2	3	3	3	1	1	1	1					3	4	4	4	1	1	1	1	1	1	1	1	1	1	1	1	1	1	1	1	4	4	4	4	1	2	2	2	3	3	3	3
AT1G52680.1	| Symbols: | late embryogenesis abundant protein-related / LEA protein-related | chr1:19618419-19618961 REVERSE LENGTH=114
AT1G52730.2	| Symbols: | Transducin/WD40 repeat-like superfamily protein | chr1:19642866-19644978 FORWARD LENGTH=343									1	1	0	0.4									1	1	0	0.4									1	1	0	0.4	1	1	0	0.4	3	3	1	1.9	8	9	2	5.3
AT1G52930.1	| Symbols: | Ribosomal RNA processing Brix domain protein | chr1:19711261-19713103 FORWARD LENGTH=320
AT1G52980.1	| Symbols: | GTP-binding family protein | chr1:19737493-19740201 FORWARD LENGTH=576									1	1	1	1
AT1G53030.1	| Symbols: | Cytochrome C oxidase copper chaperone (COX17) | chr1:19760224-19760442 REVERSE LENGTH=72	1	1	1	1									2	3	3	3					1	1	1	1	1	1	1	1
AT1G53070.1	| Symbols: | Legume lectin family protein | chr1:19778371-19779189 FORWARD LENGTH=272													2	2	2	2									1	1	1	1	1	1	1	1
AT1G53100.2	| Symbols: | Core-2/I-branching beta-1,6-N-acetylglucosaminyltransferase family protein | chr1:19786937-19788504 REVERSE LENGTH=416
AT1G53120.1	| Symbols: | RNA-binding S4 domain-containing protein | chr1:19792798-19794605 FORWARD LENGTH=320													1	1	1	1									1	2	2	2									1	1	1	1	1	1	1	1
AT1G53140.1	| Symbols: DRP5A | Dynamin related protein 5A | chr1:19799271-19802441 FORWARD LENGTH=817																																									1	1	1	1
AT1G53210.1	| Symbols: | sodium/calcium exchanger family protein / calcium-binding EF hand family protein | chr1:19844790-19847533 FORWARD LENGTH=585					1	1	1	1	1	1	1	1
AT1G53240.1	| Symbols: mMDH1 | Lactate/malate dehydrogenase family protein | chr1:19854966-19856802 REVERSE LENGTH=341					3	3	0	1.43	2	2	0	0.87	13	15	6	10.54	8	9	3	5.86	9	16	7	11.54	12	19	8	13.66	7	13	2	7.66	21	66	28	47.54	20	46	18	32.68	16	42	17	30.5	17	44	21	32.64
AT1G53280.1	| Symbols: | Class I glutamine amidotransferase-like superfamily protein | chr1:19864942-19867341 REVERSE LENGTH=438									1	1	1	1	1	1	1	1	1	1	1	1	3	3	3	3	12	16	16	16	6	8	8	8					2	4	4	4
AT1G53310.1	| Symbols: ATPPC1, PEPC1, ATPEPC1, PPC1 | phosphoenolpyruvate carboxylase 1 | chr1:19884261-19888070 REVERSE LENGTH=967									2	2	0	0.66
AT1G53330.1	| Symbols: | Pentatricopeptide repeat (PPR) superfamily protein | chr1:19896027-19897442 FORWARD LENGTH=471
AT1G53345.1	| Symbols: | unknown protein; INVOLVED IN: biological_process unknown; LOCATED IN: endomembrane system; EXPRESSED IN: 8 plant structures; EXPRESSED DURING: 4 anthesis, F mature embryo stage, petal differentiation and expansion stage, E expanded cot																																													1	1	1	1
AT1G53440.1	| Symbols: | Leucine-rich repeat transmembrane protein kinase | chr1:19945959-19951562 FORWARD LENGTH=1035	1	1	1	1
AT1G53500.1	| Symbols: MUM4, RHM2, ATRHM2, ATMUM4 | NAD-dependent epimerase/dehydratase family protein | chr1:19967157-19969239 REVERSE LENGTH=667					1	1	0	0.47	1	1	0	0.23	3	4	0	1.38	2	2	0	0.45	4	5	1	2.63	1	1	1	1																	1	2	0	0.45
AT1G53520.1	| Symbols: | Chalcone-flavanone isomerase family protein | chr1:19976485-19977915 REVERSE LENGTH=287																					4	4	4	4	8	10	10	10	9	11	11	11	6	7	7	7
AT1G53540.1	| Symbols: | HSP20-like chaperones superfamily protein | chr1:19980510-19980983 FORWARD LENGTH=157
AT1G53580.1	| Symbols: GLX2-3, ETHE1, GLY3 | glyoxalase II 3 | chr1:19991542-19993250 REVERSE LENGTH=294																									1	1	1	1					2	2	2	2	3	3	3	3	3	3	3	3	3	4	4	4
AT1G53600.1	| Symbols: | Tetratricopeptide repeat (TPR)-like superfamily protein | chr1:20001263-20003416 FORWARD LENGTH=717																									1	1	1	1
AT1G53645.1	| Symbols: | hydroxyproline-rich glycoprotein family protein | chr1:20026434-20028587 REVERSE LENGTH=523					1	1	1	1	2	2	2	2
AT1G53670.1	| Symbols: MSRB1, ATMSRB1 | methionine sulfoxide reductase B 1 | chr1:20036687-20038074 FORWARD LENGTH=202													8	10	10	10	6	7	7	7	9	11	11	11
AT1G53720.1	| Symbols: ATCYP59, CYP59 | cyclophilin 59 | chr1:20057012-20059508 FORWARD LENGTH=506
AT1G53730.2	| Symbols: SRF6 | STRUBBELIG-receptor family 6 | chr1:20061771-20065475 FORWARD LENGTH=720	1	1	1	1									1	1	1	1
AT1G53750.1	| Symbols: RPT1A | regulatory particle triple-A 1A | chr1:20065921-20068324 REVERSE LENGTH=426					8	10	10	10	18	19	19	19	1	1	1	1					5	5	5	5
AT1G53760.1	| Symbols: | unknown protein; FUNCTIONS IN: molecular_function unknown; INVOLVED IN: biological_process unknown; LOCATED IN: mitochondrion, plasma membrane, plastid, membrane; EXPRESSED IN: 25 plant structures; EXPRESSED DURING: 13 growth stages; C					2	2	2	2	2	3	3	3
AT1G53830.1	| Symbols: ATPME2, PME2 | pectin methylesterase 2 | chr1:20098562-20100745 FORWARD LENGTH=587									1	1	0	0.15	4	5	2	2.45	2	4	0	0.6					3	3	2	2.15	4	6	4	4.3	3	3	2	2.15	2	3	0	0.45	2	3	0	0.45	3	3	1	1.3
AT1G53840.1	| Symbols: ATPME1, PME1 | pectin methylesterase 1 | chr1:20101533-20103458 FORWARD LENGTH=586					5	7	7	7	4	5	5	5	4	4	4	4	3	3	3	3	5	8	8	8	1	1	1	1	3	3	3	3
AT1G53850.2	| Symbols: PAE1 | 20S proteasome alpha subunit E1 | chr1:20104131-20105792 REVERSE LENGTH=237									1	1	0	0.5																	2	2	0	1
AT1G53880.1	| Symbols: | Eukaryotic translation initiation factor 2B (eIF-2B) family protein | chr1:20115069-20118269 FORWARD LENGTH=580
AT1G54000.1	| Symbols: | GDSL-like Lipase/Acylhydrolase superfamily protein | chr1:20154548-20156365 REVERSE LENGTH=391	8	9	8	8.6	7	8	7	7.6	5	5	4	4.6	13	16	14	15.2	4	5	5	5	11	13	11	12.2	7	7	7	7	5	5	5	5	6	7	6	6.6									1	1	1	1
AT1G54010.1	| Symbols: | GDSL-like Lipase/Acylhydrolase superfamily protein | chr1:20158854-20160747 REVERSE LENGTH=386	5	6	5	5.4	2	2	1	1.4	1	1	0	0.4	9	11	9	9.8	3	4	4	4	4	8	6	6.8									1	1	0	0.4
AT1G54080.1	| Symbols: UBP1A | oligouridylate-binding protein 1A | chr1:20183923-20186824 REVERSE LENGTH=426					3	4	2	3.17	8	8	6	7.17	3	3	1	2.17	2	2	0	1.17	2	2	0	1.17	2	2	0	1.17	4	4	2	3.17	5	5	3	4.17	8	8	4	6.34	8	11	7	9.46	11	13	6	10.27
AT1G54090.1	| Symbols: ATEXO70D2, EXO70D2 | exocyst subunit exo70 family protein D2 | chr1:20189737-20191605 FORWARD LENGTH=622					1	1	1	1
AT1G54100.2	| Symbols: ALDH7B4 | aldehyde dehydrogenase 7B4 | chr1:20195435-20198853 REVERSE LENGTH=508																																	1	1	1	1	13	13	13	13	11	11	11	11	19	27	27	27
AT1G54150.1	| Symbols: | E3 Ubiquitin ligase family protein | chr1:20215480-20217303 FORWARD LENGTH=383
AT1G54170.1	| Symbols: CID3 | CTC-interacting domain 3 | chr1:20221353-20224919 REVERSE LENGTH=587																									1	1	0	0.67	1	1	0	0.67	1	1	0	0.67	1	1	0	0.67	1	1	0	0.67	1	1	0	0.67
AT1G54220.2	| Symbols: | Dihydrolipoamide acetyltransferase, long form protein | chr1:20246460-20250208 REVERSE LENGTH=539					11	15	8	10.92	15	15	10	12.08									4	4	3	3.42
AT1G54250.1	| Symbols: ATRPABC16.5, NRPB8A, NRPE8A | RNA polymerase Rpb8 | chr1:20255210-20256335 FORWARD LENGTH=146													1	1	1	1					5	8	5	6.64	7	10	8	9.09	2	4	4	4	1	2	2	2
AT1G54270.1	| Symbols: EIF4A-2 | eif4a-2 | chr1:20260495-20262018 FORWARD LENGTH=412	6	6	0	0	16	22	0	0	21	38	0	0	1	1	0	0	1	1	0	0	18	24	0	0	2	2	0	0	2	2	0	0	2	2	0	0	8	8	0	0	7	7	0	0	5	5	0	0
AT1G54270.2	| Symbols: EIF4A-2 | eif4a-2 | chr1:20260495-20262018 FORWARD LENGTH=407	5	5	0	1.24	15	20	0	4.33	20	36	0	7.53	1	1	0	0.07	1	1	0	0.07	17	22	0	4.46	2	2	0	0.14	2	2	0	0.14	2	2	0	0.14	7	7	0	1.38	6	6	0	0.37	4	4	0	1.21
AT1G54290.1	| Symbols: | Translation initiation factor SUI1 family protein | chr1:20268710-20269390 REVERSE LENGTH=113													5	6	1	2.67	3	4	0	1.33	1	1	0	0.33	5	6	1	2.67	5	7	1	3	3	7	0	2.33					2	3	0	1	1	1	0	0.33
AT1G54320.1	| Symbols: | LEM3 (ligand-effect modulator 3) family protein / CDC50 family protein | chr1:20275732-20277793 REVERSE LENGTH=349					1	1	1	1	1	1	1	1
AT1G54340.1	| Symbols: ICDH | isocitrate dehydrogenase | chr1:20283520-20286506 FORWARD LENGTH=416					10	10	8	8.63	6	7	5	5.75	16	19	17	17.75	18	20	17	18	13	14	13	13.37	10	11	10	10.37	8	8	6	6.75	13	14	12	12.63	7	9	2	4.37	6	9	2	4.25	6	9	0	2.88
AT1G54410.1	| Symbols: | dehydrin family protein | chr1:20310305-20310601 REVERSE LENGTH=98																	1	1	1	1									1	1	1	1	1	1	1	1					1	1	1	1
AT1G54450.1	| Symbols: | Calcium-binding EF-hand family protein | chr1:20336570-20339535 REVERSE LENGTH=535
AT1G54490.1	| Symbols: AIN1, EIN5, XRN4, ATXRN4 | exoribonuclease 4 | chr1:20350300-20356650 FORWARD LENGTH=947
AT1G54520.1	| Symbols: | unknown protein; FUNCTIONS IN: molecular_function unknown; INVOLVED IN: biological_process unknown; LOCATED IN: chloroplast; EXPRESSED IN: 24 plant structures; EXPRESSED DURING: 15 growth stages; CONTAINS InterPro DOMAIN/s: Protein of
AT1G54530.1	| Symbols: | Calcium-binding EF hand family protein | chr1:20366505-20366888 FORWARD LENGTH=127
AT1G54570.1	| Symbols: | Esterase/lipase/thioesterase family protein | chr1:20380649-20384953 REVERSE LENGTH=704					2	2	2	2
AT1G54580.1	| Symbols: ACP2 | acyl carrier protein 2 | chr1:20389572-20390770 FORWARD LENGTH=136
AT1G54630.1	| Symbols: ACP3 | acyl carrier protein 3 | chr1:20401642-20402919 REVERSE LENGTH=136
AT1G54690.1	| Symbols: HTA3, H2AXB, G-H2AX, GAMMA-H2AX | gamma histone variant H2AX | chr1:20414607-20415206 REVERSE LENGTH=142					1	1	0	0.33	1	1	0	0.33
AT1G54780.1	| Symbols: TLP18.3 | thylakoid lumen 18.3 kDa protein | chr1:20439533-20440953 FORWARD LENGTH=285									1	1	1	1
AT1G54920.3	| Symbols: | unknown protein; FUNCTIONS IN: molecular_function unknown; INVOLVED IN: biological_process unknown; EXPRESSED IN: 23 plant structures; EXPRESSED DURING: 15 growth stages. | chr1:20470916-20474898 FORWARD LENGTH=901
AT1G54990.1	| Symbols: AXR4, RGR, RGR1 | alpha/beta-Hydrolases superfamily protein | chr1:20511565-20513489 FORWARD LENGTH=473					1	1	1	1	2	2	2	2
AT1G55000.1	| Symbols: | peptidoglycan-binding LysM domain-containing protein | chr1:20514762-20516166 FORWARD LENGTH=221
AT1G55020.1	| Symbols: LOX1, ATLOX1 | lipoxygenase 1 | chr1:20525798-20530143 FORWARD LENGTH=859					1	1	1	1
AT1G55090.1	| Symbols: | carbon-nitrogen hydrolase family protein | chr1:20554857-20558188 FORWARD LENGTH=725									1	1	1	1
AT1G55120.1	| Symbols: ATFRUCT5, AtcwINV3, FRUCT5 | beta-fructofuranosidase 5 | chr1:20566617-20569165 FORWARD LENGTH=594																									8	9	9	9	5	5	5	5
AT1G55150.1	| Symbols: | DEA(D/H)-box RNA helicase family protein | chr1:20574634-20577141 FORWARD LENGTH=501					1	1	1	1	4	4	2	3.9	14	15	9	14.71	9	9	7	8.9	11	12	12	12	10	10	7	9.86	8	8	6	7.9	9	10	7	9.86	9	9	7	8.9	10	12	8	11.81	8	11	9	10.9
AT1G55160.1	| Symbols: | unknown protein; FUNCTIONS IN: molecular_function unknown; INVOLVED IN: biological_process unknown; LOCATED IN: mitochondrion, plastid; EXPRESSED IN: 24 plant structures; EXPRESSED DURING: 13 growth stages; BEST Arabidopsis thaliana pr									1	1	1	1
AT1G55190.1	| Symbols: PRA1.F2, PRA7 | PRA1 (Prenylated rab acceptor) family protein | chr1:20588450-20589019 FORWARD LENGTH=189									1	1	1	1
AT1G55230.1	| Symbols: | Family of unknown function (DUF716) | chr1:20602895-20603797 FORWARD LENGTH=300
AT1G55265.1	| Symbols: | Protein of unknown function, DUF538 | chr1:20617326-20617853 FORWARD LENGTH=175													2	3	3	3					3	3	3	3	3	3	3	3	3	4	4	4
AT1G55310.1	| Symbols: SR33, ATSCL33, SCL33, At-SCL33 | SC35-like splicing factor 33 | chr1:20630676-20632695 FORWARD LENGTH=287					2	2	1	1.17	1	1	0	0.17
AT1G55480.1	| Symbols: ZKT | protein containing PDZ domain, a K-box domain, and a TPR region | chr1:20713822-20715351 FORWARD LENGTH=335																																													5	5	5	5
AT1G55490.1	| Symbols: CPN60B, LEN1 | chaperonin 60 beta | chr1:20715717-20718673 REVERSE LENGTH=600	2	2	0	0.71	2	2	0	0.96	8	9	1	3.84	1	1	0	0.23	4	4	0	1.17	4	4	0	1.17					1	1	0	0.23					7	7	0	2.11	5	5	0	1.65	5	6	0	2.13
AT1G55500.3	| Symbols: ECT4 | evolutionarily conserved C-terminal region 4 | chr1:20719747-20722450 FORWARD LENGTH=592																																					2	2	2	2					1	1	1	1
AT1G55510.1	| Symbols: BCDH BETA1 | branched-chain alpha-keto acid decarboxylase E1 beta subunit | chr1:20723482-20725505 FORWARD LENGTH=352
AT1G55530.1	| Symbols: | RING/U-box superfamily protein | chr1:20729472-20730527 REVERSE LENGTH=351
AT1G55540.1	| Symbols: emb1011 | Nuclear pore complex protein | chr1:20734759-20743049 REVERSE LENGTH=1816
AT1G55570.1	| Symbols: sks12 | SKU5 similar 12 | chr1:20757882-20759771 FORWARD LENGTH=555
AT1G55670.1	| Symbols: PSAG | photosystem I subunit G | chr1:20802874-20803356 REVERSE LENGTH=160					1	1	1	1
AT1G55790.1	| Symbols: | Domain of unknown function (DUF2431) | chr1:20852685-20856069 REVERSE LENGTH=515
AT1G55805.1	| Symbols: | BolA-like family protein | chr1:20858956-20859438 REVERSE LENGTH=160													6	7	7	7	3	3	3	3	3	3	3	3	1	2	2	2	1	1	1	1
AT1G55810.3	| Symbols: UKL3 | uridine kinase-like 3 | chr1:20861273-20864003 FORWARD LENGTH=466
AT1G55840.2	| Symbols: | Sec14p-like phosphatidylinositol transfer family protein | chr1:20873943-20876018 FORWARD LENGTH=298
AT1G55860.1	| Symbols: UPL1 | ubiquitin-protein ligase 1 | chr1:20879900-20895393 REVERSE LENGTH=3930					4	4	1	2.01	7	7	1	3.03									1	1	0	0.34
AT1G55890.1	| Symbols: | Tetratricopeptide repeat (TPR)-like superfamily protein | chr1:20901364-20902560 FORWARD LENGTH=398					6	7	7	7	8	10	10	10
AT1G56000.1	| Symbols: | FAD/NAD(P)-binding oxidoreductase family protein | chr1:20944149-20946101 FORWARD LENGTH=384																									3	3	3	3					3	3	3	3	1	1	1	1	1	1	1	1	2	3	3	3
AT1G56050.1	| Symbols: | GTP-binding protein-related | chr1:20963793-20966181 FORWARD LENGTH=421									1	1	1	1
AT1G56070.1	| Symbols: LOS1 | Ribosomal protein S5/Elongation factor G/III/V family protein | chr1:20968245-20971077 REVERSE LENGTH=843	5	5	4	4.97	27	32	25	31.82	57	87	66	86.45	20	26	17	25.77	14	15	12	14.92	42	56	44	55.69	27	36	24	35.69	22	32	27	31.87	31	53	40	52.66	29	38	27	37.71	29	51	40	50.71	36	60	45	59.61
AT1G56100.3	| Symbols: | Plant invertase/pectin methylesterase inhibitor superfamily protein | chr1:20983374-20983888 REVERSE LENGTH=141													1	1	1	1
AT1G56110.1	| Symbols: NOP56 | homolog of nucleolar protein NOP56 | chr1:20984544-20986893 REVERSE LENGTH=522					9	10	10	10	16	18	18	18									1	1	1	1
AT1G56130.1	| Symbols: | Leucine-rich repeat transmembrane protein kinase | chr1:20994931-21000887 REVERSE LENGTH=1032	1	1	0	0.14					1	1	1	1					1	1	0	0.14									1	1	0	0.14
AT1G56140.1	| Symbols: | Leucine-rich repeat transmembrane protein kinase | chr1:21001708-21007725 REVERSE LENGTH=1033	1	1	0	0.57									1	1	1	1	2	2	1	1.57	1	1	1	1	3	3	3	3	3	3	2	2.57	1	1	1	1
AT1G56145.1	| Symbols: | Leucine-rich repeat transmembrane protein kinase | chr1:21008225-21013934 REVERSE LENGTH=1012	3	3	2	2.29													1	1	0	0.29									1	1	0	0.29
AT1G56170.1	| Symbols: HAP5B, ATHAP5B, NF-YC2 | nuclear factor Y, subunit C2 | chr1:21025118-21025717 FORWARD LENGTH=199
AT1G56190.1	| Symbols: | Phosphoglycerate kinase family protein | chr1:21028403-21030454 FORWARD LENGTH=478					2	2	0	0.71	10	12	3	6.18	6	7	2	3.21	5	5	1	2.01	10	38	4	10.22	15	36	8	13.24	12	37	9	14.35	23	44	16	23.47	22	36	22	26.54	24	34	14	20.1	20	34	15	20.86
AT1G56330.1	| Symbols: SAR1, ATSAR1, ATSARA1B, ATSAR1B, SAR1B | secretion-associated RAS 1B | chr1:21086845-21088478 REVERSE LENGTH=193					4	4	0	1.6	3	4	0	1.6	5	6	1	3	4	5	0	2	6	7	0	2.8	6	7	2	4	2	3	0	1.2	5	7	1	3.4	7	9	4	6	2	2	0	0.8	2	2	0	0.8
AT1G56340.1	| Symbols: CRT1, CRT1a, AtCRT1a | calreticulin 1a | chr1:21090059-21092630 REVERSE LENGTH=425					9	9	5	7.08	8	10	6	8.08
AT1G56410.1	| Symbols: ERD2, HSP70T-1 | heat shock protein 70 (Hsp 70) family protein | chr1:21117147-21119241 FORWARD LENGTH=617	2	2	0	0.02	14	19	0	0.29	17	25	0	0.4	2	2	0	0.02	1	1	0	0.01	8	8	0	0.12					2	2	0	0.03	1	1	0	0.02	3	3	0	0.03	5	7	0	0.08	3	5	0	0.06
AT1G56440.1	| Symbols: TPR5 | Tetratricopeptide repeat (TPR)-like superfamily protein | chr1:21138765-21141482 REVERSE LENGTH=476													10	11	11	11	10	10	10	10	8	8	8	8	4	5	5	5	5	5	5	5	3	3	3	3
AT1G56450.1	| Symbols: PBG1 | 20S proteasome beta subunit G1 | chr1:21141970-21144186 FORWARD LENGTH=246					1	1	1	1	1	1	1	1									1	1	1	1					3	3	3	3													1	1	1	1
AT1G56500.1	| Symbols: | haloacid dehalogenase-like hydrolase family protein | chr1:21159775-21167092 FORWARD LENGTH=1055
AT1G56560.1	| Symbols: | Plant neutral invertase family protein | chr1:21192593-21194948 FORWARD LENGTH=616
AT1G56580.1	| Symbols: SVB | Protein of unknown function, DUF538 | chr1:21198402-21198902 REVERSE LENGTH=166													8	11	10	10.9	3	4	3	3.9	4	6	5	5.9	8	9	8	8.9	4	4	4	4	5	5	4	4.9	1	1	1	1	1	1	0	0.9
AT1G56590.1	| Symbols: ZIP4 | Clathrin adaptor complexes medium subunit family protein | chr1:21202250-21204697 REVERSE LENGTH=415
AT1G56670.1	| Symbols: | GDSL-like Lipase/Acylhydrolase superfamily protein | chr1:21241688-21243965 FORWARD LENGTH=373																					1	1	1	1
AT1G56700.2	| Symbols: | Peptidase C15, pyroglutamyl peptidase I-like | chr1:21256743-21257640 FORWARD LENGTH=219													12	16	15	15.48	7	9	8	8.48	9	18	16	16.96	4	6	6	6	7	8	7	7.48	4	4	4	4	3	3	3	3	3	5	5	5
AT1G57610.1	| Symbols: | Protein of unknown function (DUF607) | chr1:21337449-21338412 REVERSE LENGTH=293
AT1G57650.1	| Symbols: | ATP binding | chr1:21351291-21354311 FORWARD LENGTH=709
AT1G57700.1	| Symbols: | Protein kinase superfamily protein | chr1:21371051-21373860 FORWARD LENGTH=692									1	1	1	1
AT1G57720.2	| Symbols: | Translation elongation factor EF1B, gamma chain | chr1:21377873-21380114 FORWARD LENGTH=413					1	1	1	1	2	3	2	2.56									2	2	1	1.56					5	5	3	4.12													3	4	1	2.67
AT1G57790.1	| Symbols: | F-box family protein | chr1:21404578-21405636 REVERSE LENGTH=352
AT1G58080.1	| Symbols: ATATP-PRT1, HISN1A, ATP-PRT1 | ATP phosphoribosyl transferase 1 | chr1:21504562-21507429 REVERSE LENGTH=411
AT1G58230.1	| Symbols: | binding | chr1:21566331-21578865 FORWARD LENGTH=2604
AT1G58380.1	| Symbols: XW6 | Ribosomal protein S5 family protein | chr1:21689115-21690085 FORWARD LENGTH=284					9	13	4	6.85	9	19	5	9.44									5	6	1	2.58
AT1G58440.1	| Symbols: XF1, SQE1 | FAD/NAD(P)-binding oxidoreductase family protein | chr1:21714094-21717246 REVERSE LENGTH=531
AT1G59218.2	| Symbols: | Disease resistance protein (CC-NBS-LRR class) family | chr1:21828398-21831713 FORWARD LENGTH=1049					1	1	1	1
AT1G59453.1	| Symbols: | B-block binding subunit of TFIIIC | chr1:21846902-21853384 REVERSE LENGTH=1729									1	1	1	1													1	1	1	1
AT1G59520.2	| Symbols: CW7 | CW7 | chr1:21861589-21865418 FORWARD LENGTH=319																					1	1	1	1	1	1	1	1
AT1G59580.1	| Symbols: ATMPK2, MPK2 | mitogen-activated protein kinase homolog 2 | chr1:21884521-21885743 FORWARD LENGTH=376
AT1G59600.1	| Symbols: ZCW7 | ZCW7 | chr1:21889927-21891910 REVERSE LENGTH=324													11	15	15	15	9	10	10	10	8	8	8	8	3	3	3	3
AT1G59610.1	| Symbols: ADL3, CF1, DRP2B, DL3 | dynamin-like 3 | chr1:21893413-21900780 FORWARD LENGTH=920					7	8	2	4.57	6	7	3	4.71
AT1G59620.1	| Symbols: CW9 | Disease resistance protein (CC-NBS-LRR class) family | chr1:21902627-21905527 FORWARD LENGTH=842
AT1G59700.1	| Symbols: ATGSTU16, GSTU16 | glutathione S-transferase TAU 16 | chr1:21936459-21937763 FORWARD LENGTH=234																																													4	4	4	4
AT1G59730.1	| Symbols: ATH7, TH7 | thioredoxin H-type 7 | chr1:21952759-21953392 REVERSE LENGTH=129	1	1	1	1
AT1G59760.1	| Symbols: | RNA helicase, ATP-dependent, SK12/DOB1 protein | chr1:21984571-21990110 REVERSE LENGTH=988
AT1G59820.1	| Symbols: ALA3 | aminophospholipid ATPase 3 | chr1:22011599-22020023 FORWARD LENGTH=1213					1	1	1	1
AT1G59830.1	| Symbols: PP2A-1 | protein phosphatase 2A-2 | chr1:22020708-22022293 REVERSE LENGTH=306									2	2	0	0.98
AT1G59870.1	| Symbols: PEN3, PDR8, ATPDR8, ABCG36, ATABCG36 | ABC-2 and Plant PDR ABC-type transporter family protein | chr1:22034661-22039844 FORWARD LENGTH=1469					11	12	9	11.79	11	11	8	10.79									1	1	1	1									1	1	1	1
AT1G59900.1	| Symbols: AT-E1 ALPHA, E1 ALPHA | pyruvate dehydrogenase complex E1 alpha subunit | chr1:22051368-22053660 FORWARD LENGTH=389					12	14	11	12.75	10	13	10	11.75	1	1	0	0.58					4	6	6	6	3	3	2	2.58	2	2	2	2	4	5	5	5	8	8	5	6.75	9	10	9	9.58	12	14	9	11.92
AT1G59930.1	| Symbols: | MADS-box family protein | chr1:22061083-22061481 REVERSE LENGTH=132
AT1G59950.1	| Symbols: | NAD(P)-linked oxidoreductase superfamily protein | chr1:22068033-22070588 REVERSE LENGTH=320																																													2	2	0	0.07
AT1G59960.1	| Symbols: | NAD(P)-linked oxidoreductase superfamily protein | chr1:22071410-22073067 REVERSE LENGTH=326																																					1	1	1	1					13	16	14	15.93
AT1G59980.1	| Symbols: ATDJC39, ARL2 | ARG1-like 2 | chr1:22081069-22083491 FORWARD LENGTH=414													1	1	1	1																	1	1	1	1
AT1G59990.1	| Symbols: | DEA(D/H)-box RNA helicase family protein | chr1:22090369-22092885 REVERSE LENGTH=581									5	5	5	5
AT1G60000.1	| Symbols: | RNA-binding (RRM/RBD/RNP motifs) family protein | chr1:22093678-22094540 REVERSE LENGTH=258
AT1G60070.1	| Symbols: | Adaptor protein complex AP-1, gamma subunit | chr1:22142944-22149296 REVERSE LENGTH=862	3	3	3	3	8	8	8	8	9	9	9	9	2	3	3	3	1	1	1	1	2	2	2	2									1	1	1	1
AT1G60080.1	| Symbols: | 3'-5'-exoribonuclease family protein | chr1:22152605-22154339 REVERSE LENGTH=302
AT1G60110.1	| Symbols: | Mannose-binding lectin superfamily protein | chr1:22168502-22170649 FORWARD LENGTH=598					6	6	6	6	4	4	4	4
AT1G60170.1	| Symbols: emb1220 | pre-mRNA processing ribonucleoprotein binding region-containing protein | chr1:22193008-22195177 FORWARD LENGTH=485									1	1	1	1
AT1G60190.1	| Symbols: | ARM repeat superfamily protein | chr1:22198403-22200463 FORWARD LENGTH=686
AT1G60200.1	| Symbols: | splicing factor PWI domain-containing protein / RNA recognition motif (RRM)-containing protein | chr1:22200882-22205241 REVERSE LENGTH=899
AT1G60400.1	| Symbols: | F-box/RNI-like superfamily protein | chr1:22254405-22255798 FORWARD LENGTH=403									1	1	1	1
AT1G60420.1	| Symbols: | DC1 domain-containing protein | chr1:22261978-22264243 FORWARD LENGTH=578									5	6	6	6
AT1G60430.2	| Symbols: ARPC3 | actin-related protein C3 | chr1:22264797-22265682 REVERSE LENGTH=174																																					1	1	1	1	1	2	2	2	1	1	1	1
AT1G60440.1	| Symbols: ATCOAA, ATPANK1, PANK1 | pantothenate kinase 1 | chr1:22266653-22269070 REVERSE LENGTH=383					1	1	1	1	1	1	0	0.46
AT1G60490.1	| Symbols: ATVPS34, VPS34, PI3K | vacuolar protein sorting 34 | chr1:22285792-22290190 REVERSE LENGTH=814									1	1	1	1									1	1	1	1	1	1	1	1					1	1	1	1
AT1G60550.1	| Symbols: ECHID, DHNS | enoyl-CoA hydratase/isomerase D | chr1:22305988-22308092 REVERSE LENGTH=337
AT1G60620.1	| Symbols: ATRPAC43, RPAC43 | RNA polymerase I subunit 43 | chr1:22331225-22333370 FORWARD LENGTH=385
AT1G60640.2	| Symbols: | unknown protein; FUNCTIONS IN: molecular_function unknown; INVOLVED IN: biological_process unknown; LOCATED IN: cellular_component unknown; Has 30201 Blast hits to 17322 proteins in 780 species: Archae - 12; Bacteria - 1396; Metazoa -
AT1G60650.2	| Symbols: | RNA-binding (RRM/RBD/RNP motifs) family protein with retrovirus zinc finger-like domain | chr1:22340089-22342148 FORWARD LENGTH=292									1	1	1	1
AT1G60660.1	| Symbols: B5 #5, ATCB5LP, CB5LP | cytochrome B5-like protein | chr1:22342589-22342954 REVERSE LENGTH=121									1	1	1	1
AT1G60690.1	| Symbols: | NAD(P)-linked oxidoreductase superfamily protein | chr1:22349892-22351668 REVERSE LENGTH=345									1	1	0	0.17					1	1	0	0.17	1	1	0	0.17	2	2	0	0.43	2	3	0	0.6	4	4	0	0.86	12	15	5	7.22	10	17	8	9.8	13	20	6	9.25
AT1G60710.1	| Symbols: ATB2 | NAD(P)-linked oxidoreductase superfamily protein | chr1:22355073-22356627 REVERSE LENGTH=345									2	3	2	2.49					2	2	0	1.08	1	1	0	0.49	11	12	9	10.82	9	12	8	10.3	13	17	12	15.05	23	44	34	39.99	22	40	28	34.91	26	52	37	46.14
AT1G60730.1	| Symbols: | NAD(P)-linked oxidoreductase superfamily protein | chr1:22358327-22360082 REVERSE LENGTH=345					1	1	1	1	3	3	2	2.34					3	3	1	1.75	2	2	1	1.34	4	4	2	2.75	3	4	1	2.09	9	11	8	9.09	15	21	14	16.79	14	24	15	18.28	17	31	20	24.62
AT1G60740.1	| Symbols: | Thioredoxin superfamily protein | chr1:22361127-22361817 FORWARD LENGTH=162																									2	2	0	1	1	1	0	0.5	2	2	0	1	3	4	0	1.58	6	6	1	2.65	3	3	0	1.5
AT1G60770.1	| Symbols: | Tetratricopeptide repeat (TPR)-like superfamily protein | chr1:22366959-22368648 REVERSE LENGTH=491					3	3	3	3	4	4	4	4	2	2	2	2	1	1	1	1	1	1	1	1
AT1G60780.1	| Symbols: HAP13 | Clathrin adaptor complexes medium subunit family protein | chr1:22369289-22371885 REVERSE LENGTH=428					7	7	7	7	7	7	7	7
AT1G60850.1	| Symbols: ATRPAC42, AAC42 | DNA-directed RNA polymerase family protein | chr1:22398078-22400155 REVERSE LENGTH=375									1	1	1	1
AT1G60900.1	| Symbols: | U2 snRNP auxilliary factor, large subunit, splicing factor | chr1:22424008-22427806 FORWARD LENGTH=589																	1	1	0	0.43	1	1	0	0.43	3	3	2	2.43	3	3	2	2.43	5	6	5	5.43					1	1	0	0.43
AT1G60930.1	| Symbols: RECQL4B, ATRECQ4B, RECQ4B | RECQ helicase L4B | chr1:22431093-22438302 REVERSE LENGTH=1150
AT1G60940.1	| Symbols: SNRK2-10, SNRK2.10, SRK2B | SNF1-related protein kinase 2.10 | chr1:22439398-22441896 REVERSE LENGTH=361									2	2	0	1.14	2	2	0	1.19	5	5	2	3.84	6	6	2	4.53					1	1	0	0.64	2	2	0	1.34
AT1G60950.1	| Symbols: FED A, ATFD2 | 2Fe-2S ferredoxin-like superfamily protein | chr1:22444565-22445011 FORWARD LENGTH=148									1	1	1	1
AT1G60970.1	| Symbols: | SNARE-like superfamily protein | chr1:22448008-22449387 REVERSE LENGTH=177
AT1G60980.1	| Symbols: ATGA20OX4, GA20OX4 | gibberellin 20-oxidase 4 | chr1:22452573-22454140 FORWARD LENGTH=376																																									1	1	1	1
AT1G60990.1	| Symbols: | Glycine cleavage T-protein family | chr1:22462771-22465416 REVERSE LENGTH=432
AT1G61000.1	| Symbols: | FUNCTIONS IN: molecular_function unknown; INVOLVED IN: mitosis; LOCATED IN: plasma membrane; EXPRESSED IN: cultured cell; CONTAINS InterPro DOMAIN/s: Kinetochore protein Nuf2 (InterPro:IPR005549); Has 50972 Blast hits to 29793 proteins
AT1G61010.2	| Symbols: CPSF73-I | cleavage and polyadenylation specificity factor 73-I | chr1:22474954-22477660 REVERSE LENGTH=693
AT1G61040.1	| Symbols: VIP5 | plus-3 domain-containing protein | chr1:22483817-22485748 FORWARD LENGTH=643
AT1G61093.1	| Symbols: | unknown protein; FUNCTIONS IN: molecular_function unknown; INVOLVED IN: biological_process unknown; LOCATED IN: cellular_component unknown; BEST Arabidopsis thaliana protein match is: unknown protein (TAIR:AT1G61095.1); Has 30201 Blast									1	1	1	1
AT1G61100.2	| Symbols: | disease resistance protein (TIR class), putative | chr1:22508831-22512122 REVERSE LENGTH=807													2	3	3	3					3	3	3	3	2	3	3	3	2	2	2	2	2	3	3	3
AT1G61150.6	| Symbols: | LisH and RanBPM domains containing protein | chr1:22542979-22544355 FORWARD LENGTH=226
AT1G61250.1	| Symbols: SC3 | secretory carrier 3 | chr1:22586035-22588664 FORWARD LENGTH=289					2	3	3	3	2	2	2	2									1	1	1	1
AT1G61320.1	| Symbols: | FBD / Leucine Rich Repeat domains containing protein | chr1:22617370-22619718 FORWARD LENGTH=459
AT1G61353.1	| Symbols: | unknown protein; Has 30201 Blast hits to 17322 proteins in 780 species: Archae - 12; Bacteria - 1396; Metazoa - 17338; Fungi - 3422; Plants - 5037; Viruses - 0; Other Eukaryotes - 2996 (source: NCBI BLink). | chr1:22636595-22636768 REV									1	1	1	1
AT1G61360.2	| Symbols: | S-locus lectin protein kinase family protein | chr1:22637867-22640731 REVERSE LENGTH=740
AT1G61380.1	| Symbols: SD1-29 | S-domain-1 29 | chr1:22646277-22649401 REVERSE LENGTH=805	4	4	4	4	1	1	1	1
AT1G61520.3	| Symbols: LHCA3 | photosystem I light harvesting complex gene 3 | chr1:22700152-22701149 FORWARD LENGTH=273					1	1	1	1	2	3	3	3
AT1G61570.1	| Symbols: TIM13 | translocase of the inner mitochondrial membrane 13 | chr1:22718897-22719473 REVERSE LENGTH=87					1	2	2	2	2	2	2	2													1	2	2	2	1	1	1	1	1	2	2	2	1	2	2	2
AT1G61620.1	| Symbols: | phosphoinositide binding | chr1:22737653-22739209 FORWARD LENGTH=310													1	1	1	1									4	4	4	4	1	1	1	1					1	1	1	1	1	2	2	2
AT1G61660.2	| Symbols: | basic helix-loop-helix (bHLH) DNA-binding superfamily protein | chr1:22754603-22756171 REVERSE LENGTH=347
AT1G61690.1	| Symbols: | phosphoinositide binding | chr1:22782825-22786782 REVERSE LENGTH=1171
AT1G61790.1	| Symbols: | Oligosaccharyltransferase complex/magnesium transporter family protein | chr1:22814390-22815430 FORWARD LENGTH=346									1	1	1	1
AT1G61795.1	| Symbols: | PAK-box/P21-Rho-binding family protein | chr1:22819943-22820826 FORWARD LENGTH=128
AT1G61870.1	| Symbols: PPR336 | pentatricopeptide repeat 336 | chr1:22865326-22866552 REVERSE LENGTH=408					3	3	3	3	4	4	4	4	1	1	1	1	1	1	1	1
AT1G62020.1	| Symbols: | Coatomer, alpha subunit | chr1:22919814-22923728 FORWARD LENGTH=1216									12	14	5	9.27									6	7	0	3.32
AT1G62180.2	| Symbols: APR2 | 5'adenylylphosphosulfate reductase 2 | chr1:22975794-22977465 REVERSE LENGTH=447									2	3	3	3
AT1G62200.1	| Symbols: | Major facilitator superfamily protein | chr1:22982147-22984334 REVERSE LENGTH=590
AT1G62290.1	| Symbols: | Saposin-like aspartyl protease family protein | chr1:23010107-23012681 REVERSE LENGTH=513					4	5	3	3.31	3	3	0	0.46
AT1G62330.1	| Symbols: | O-fucosyltransferase family protein | chr1:23046965-23050053 FORWARD LENGTH=652													1	1	1	1
AT1G62380.1	| Symbols: ACO2, ATACO2 | ACC oxidase 2 | chr1:23082340-23084068 FORWARD LENGTH=320									1	1	1	1
AT1G62390.1	| Symbols: Phox2 | Octicosapeptide/Phox/Bem1p (PB1) domain-containing protein / tetratricopeptide repeat (TPR)-containing protein | chr1:23084632-23086887 REVERSE LENGTH=751					19	22	22	22	25	38	38	38	4	4	4	4	2	2	2	2	2	2	2	2													1	2	2	2
AT1G62480.1	| Symbols: | Vacuolar calcium-binding protein-related | chr1:23128799-23129548 FORWARD LENGTH=152
AT1G62570.1	| Symbols: FMO GS-OX4 | flavin-monooxygenase glucosinolate S-oxygenase 4 | chr1:23169207-23171783 FORWARD LENGTH=461
AT1G62600.1	| Symbols: | Flavin-binding monooxygenase family protein | chr1:23179542-23181411 FORWARD LENGTH=452
AT1G62640.2	| Symbols: KAS III | 3-ketoacyl-acyl carrier protein synthase III | chr1:23192502-23194737 FORWARD LENGTH=404					3	4	4	4	4	4	4	4									2	2	2	2																	1	1	1	1	1	2	2	2
AT1G62710.1	| Symbols: BETA-VPE, BETAVPE | beta vacuolar processing enzyme | chr1:23224070-23226857 REVERSE LENGTH=486
AT1G62740.1	| Symbols: Hop2 | stress-inducible protein, putative | chr1:23231026-23233380 FORWARD LENGTH=571													10	13	13	13	7	7	7	7	7	8	8	8	8	11	11	11	7	7	7	7	3	4	4	4	2	4	4	4	1	1	1	1	29	39	37	38.08
AT1G62750.1	| Symbols: ATSCO1, ATSCO1/CPEF-G, SCO1 | Translation elongation factor EFG/EF2 protein | chr1:23233622-23236321 REVERSE LENGTH=783									4	4	4	4									2	2	2	2	1	2	2	2									4	6	6	6	2	2	2	2	1	1	1	1
AT1G62780.1	| Symbols: | unknown protein; FUNCTIONS IN: molecular_function unknown; INVOLVED IN: biological_process unknown; LOCATED IN: chloroplast, chloroplast stroma; EXPRESSED IN: 22 plant structures; EXPRESSED DURING: 14 growth stages; Has 94 Blast hits t																																													2	3	3	3
AT1G62800.1	| Symbols: ASP4 | aspartate aminotransferase 4 | chr1:23253934-23257416 REVERSE LENGTH=403	2	3	0	0.07									3	3	0	0.06	2	2	0	0.04	1	2	0	0.05					1	1	0	0.03	2	9	1	1.21	2	4	0	0.09	3	5	0	0.12	2	5	0	0.11
AT1G62810.1	| Symbols: | Copper amine oxidase family protein | chr1:23258253-23261772 REVERSE LENGTH=712																													1	1	1	1	9	10	10	10	6	7	7	7	4	4	4	4	6	7	7	7
AT1G62820.1	| Symbols: | Calcium-binding EF-hand family protein | chr1:23263822-23264268 REVERSE LENGTH=148																																					8	8	4	5.78	6	7	3	4.78	6	7	1	3.67
AT1G62830.1	| Symbols: LDL1, SWP1, ATSWP1, ATLSD1, LSD1 | LSD1-like 1 | chr1:23264638-23267172 REVERSE LENGTH=844
AT1G62840.1	| Symbols: | Protein of unknown function (DUF1442) | chr1:23271481-23272407 FORWARD LENGTH=224
AT1G62850.3	| Symbols: | Class I peptide chain release factor | chr1:23272608-23274211 REVERSE LENGTH=236					1	1	1	1									1	1	1	1
AT1G62914.1	| Symbols: | pentatricopeptide (PPR) repeat-containing protein | chr1:23301576-23303162 FORWARD LENGTH=528																																													1	1	1	1
AT1G62990.1	| Symbols: KNAT7, IXR11 | KNOTTED-like homeobox of Arabidopsis thaliana 7 | chr1:23337468-23340348 FORWARD LENGTH=291																																					1	1	1	1
AT1G63000.1	| Symbols: NRS/ER, UER1 | nucleotide-rhamnose synthase/epimerase-reductase | chr1:23342510-23343859 FORWARD LENGTH=301					5	5	4	4.6	10	12	9	10.8	1	1	0	0.6					7	7	5	6.2	9	10	8	9.2	7	8	6	7.2	11	12	9	10.8	22	30	26	28.4	20	27	22	25	22	49	42	46.2
AT1G63030.2	| Symbols: ddf2 | Integrase-type DNA-binding superfamily protein | chr1:23367603-23368148 REVERSE LENGTH=181
AT1G63160.1	| Symbols: RFC2 | replication factor C 2 | chr1:23422068-23423771 REVERSE LENGTH=333									1	1	1	1
AT1G63170.1	| Symbols: | Zinc finger, C3HC4 type (RING finger) family protein | chr1:23425574-23427073 FORWARD LENGTH=381																									1	1	1	1
AT1G63180.1	| Symbols: UGE3 | UDP-D-glucose/UDP-D-galactose 4-epimerase 3 | chr1:23427559-23429384 REVERSE LENGTH=351																																					5	5	2	3.14	5	5	1	2.53	17	25	12	16.99
AT1G63220.1	| Symbols: | Calcium-dependent lipid-binding (CaLB domain) family protein | chr1:23449017-23450244 FORWARD LENGTH=147
AT1G63250.1	| Symbols: | DEA(D/H)-box RNA helicase family protein | chr1:23463284-23466451 REVERSE LENGTH=798
AT1G63290.1	| Symbols: | Aldolase-type TIM barrel family protein | chr1:23472095-23473590 REVERSE LENGTH=227													7	13	13	13	2	4	4	4	4	6	6	6	2	2	2	2	1	1	1	1	3	3	3	3	3	3	3	3	1	2	2	2
AT1G63460.1	| Symbols: GPX8, ATGPX8 | glutathione peroxidase 8 | chr1:23535118-23536326 FORWARD LENGTH=167									1	1	1	1																									6	6	6	6	4	4	4	4	7	7	7	7
AT1G63610.2	| Symbols: | unknown protein; FUNCTIONS IN: molecular_function unknown; INVOLVED IN: biological_process unknown; LOCATED IN: chloroplast; EXPRESSED IN: 22 plant structures; EXPRESSED DURING: 13 growth stages; BEST Arabidopsis thaliana protein match																																					1	1	1	1
AT1G63660.1	| Symbols: | GMP synthase (glutamine-hydrolyzing), putative / glutamine amidotransferase, putative | chr1:23604127-23607080 REVERSE LENGTH=534									8	9	9	9									1	1	1	1
AT1G63680.1	| Symbols: ATMURE, PDE316, MURE | acid-amino acid ligases;ligases;ATP binding;ATP binding;ligases | chr1:23614461-23617247 FORWARD LENGTH=772
AT1G63770.4	| Symbols: | Peptidase M1 family protein | chr1:23657791-23663476 REVERSE LENGTH=895																																													49	78	78	78
AT1G63780.1	| Symbols: IMP4 | Ribosomal RNA processing Brix domain protein | chr1:23665045-23667243 REVERSE LENGTH=294									3	3	3	3
AT1G63810.1	| Symbols: | CONTAINS InterPro DOMAIN/s: Nrap protein (InterPro:IPR005554); Has 396 Blast hits to 382 proteins in 182 species: Archae - 3; Bacteria - 2; Metazoa - 142; Fungi - 146; Plants - 43; Viruses - 0; Other Eukaryotes - 60 (source: NCBI BLink									1	1	1	1
AT1G63940.1	| Symbols: MDAR6 | monodehydroascorbate reductase 6 | chr1:23730206-23733534 FORWARD LENGTH=486																																					18	22	22	22	18	26	26	26	24	48	48	48
AT1G63970.1	| Symbols: ISPF, MECPS | isoprenoid F | chr1:23738923-23740336 REVERSE LENGTH=231																					1	1	1	1	3	3	3	3	3	3	3	3	2	2	2	2	2	2	2	2	1	2	2	2	1	1	1	1
AT1G64040.1	| Symbols: TOPP3 | type one serine/threonine protein phosphatase 3 | chr1:23758626-23760274 REVERSE LENGTH=322
AT1G64090.1	| Symbols: RTNLB3 | Reticulan like protein B3 | chr1:23789395-23790669 FORWARD LENGTH=255					1	1	1	1	1	1	1	1
AT1G64185.1	| Symbols: | Lactoylglutathione lyase / glyoxalase I family protein | chr1:23824527-23825152 FORWARD LENGTH=118													3	3	3	3	1	1	1	1	3	3	3	3	1	1	1	1
AT1G64190.1	| Symbols: | 6-phosphogluconate dehydrogenase family protein | chr1:23825549-23827012 REVERSE LENGTH=487	3	3	0	0.67	4	6	0	1.49	4	6	0	1.49	4	9	0	2.31	5	11	0	2.71	3	8	0	2.11	2	4	0	1.09	2	3	0	0.82	4	4	0	1.17	3	3	0	0.75	3	3	0	0.75
AT1G64230.3	| Symbols: UBC28 | ubiquitin-conjugating enzyme 28 | chr1:23833792-23835220 FORWARD LENGTH=157	3	6	2	3.33	1	1	0	0.33	3	4	0	1.33	4	11	1	4.33	3	6	0	2	4	14	2	6	2	2	0	0.67	1	1	0	0.33	2	2	0	0.67	1	1	0	0.33	2	2	0	0.67	2	3	0	1
AT1G64330.1	| Symbols: | myosin heavy chain-related | chr1:23872172-23873970 FORWARD LENGTH=555
AT1G64350.1	| Symbols: SEH1H | Transducin/WD40 repeat-like superfamily protein | chr1:23881582-23883073 FORWARD LENGTH=326									1	1	1	1
AT1G64400.1	| Symbols: LACS3 | AMP-dependent synthetase and ligase family protein | chr1:23915802-23919681 REVERSE LENGTH=665									1	1	0	0.2
AT1G64440.1	| Symbols: RHD1, REB1, UGE4 | NAD(P)-binding Rossmann-fold superfamily protein | chr1:23937102-23939565 FORWARD LENGTH=348
AT1G64500.1	| Symbols: | Glutaredoxin family protein | chr1:23953270-23954376 FORWARD LENGTH=368
AT1G64510.1	| Symbols: | Translation elongation factor EF1B/ribosomal protein S6 family protein | chr1:23954993-23956205 REVERSE LENGTH=207									1	1	1	1													1	2	2	2					1	1	1	1					1	1	1	1	1	1	1	1
AT1G64520.1	| Symbols: RPN12a | regulatory particle non-ATPase 12A | chr1:23956459-23958120 FORWARD LENGTH=267					8	10	10	10	13	18	18	18									6	6	6	6
AT1G64550.1	| Symbols: ATGCN3, GCN3 | general control non-repressible 3 | chr1:23968850-23973369 FORWARD LENGTH=715					2	2	2	2																																					1	1	1	1
AT1G64650.1	| Symbols: | Major facilitator superfamily protein | chr1:24023805-24026336 REVERSE LENGTH=462					1	1	1	1	3	3	3	3
AT1G64660.1	| Symbols: ATMGL, MGL | methionine gamma-lyase | chr1:24028977-24030537 FORWARD LENGTH=441
AT1G64740.1	| Symbols: TUA1 | alpha-1 tubulin | chr1:24050114-24052296 FORWARD LENGTH=450	2	2	0	0.7	7	8	1	3.03
AT1G64760.1	| Symbols: | O-Glycosyl hydrolases family 17 protein | chr1:24054220-24056194 REVERSE LENGTH=481																									5	5	3	4.6	4	4	3	3.8	10	14	10	13.2	5	7	3	6.2	5	8	7	7.8
AT1G64770.3	| Symbols: NDF2 | NDH-dependent cyclic electron flow 1 | chr1:24057549-24059405 FORWARD LENGTH=367																									1	1	1	1	1	1	1	1
AT1G64790.1	| Symbols: ILA | ILITYHIA | chr1:24065232-24081908 REVERSE LENGTH=2610					13	13	13	13	21	21	21	21									1	1	1	1
AT1G64840.1	| Symbols: | Protein of unknown function (DUF295) | chr1:24094010-24095164 FORWARD LENGTH=384
AT1G64880.1	| Symbols: | Ribosomal protein S5 family protein | chr1:24105713-24108780 FORWARD LENGTH=515					2	2	2	2	1	1	1	1									1	1	1	1
AT1G64980.1	| Symbols: | Nucleotide-diphospho-sugar transferases superfamily protein | chr1:24137840-24138619 REVERSE LENGTH=259																																	1	1	1	1	2	2	2	2	1	1	1	1	2	3	3	3
AT1G65010.1	| Symbols: | Plant protein of unknown function (DUF827) | chr1:24149543-24154024 FORWARD LENGTH=1345
AT1G65030.1	| Symbols: | Transducin/WD40 repeat-like superfamily protein | chr1:24156798-24158511 FORWARD LENGTH=345
AT1G65150.1	| Symbols: | TRAF-like family protein | chr1:24204167-24205558 REVERSE LENGTH=296																									1	1	1	1					5	6	6	6	3	3	3	3	3	3	3	3	1	1	1	1
AT1G65160.1	| Symbols: | Ubiquitin carboxyl-terminal hydrolase family protein | chr1:24206224-24207738 FORWARD LENGTH=309
AT1G65220.1	| Symbols: | ARM repeat superfamily protein | chr1:24226204-24228799 FORWARD LENGTH=411
AT1G65260.1	| Symbols: PTAC4, VIPP1 | plastid transcriptionally active 4 | chr1:24236329-24240428 FORWARD LENGTH=330					2	2	2	2	2	2	2	2
AT1G65270.2	| Symbols: | unknown protein; FUNCTIONS IN: molecular_function unknown; INVOLVED IN: biological_process unknown; LOCATED IN: endoplasmic reticulum, plasma membrane; EXPRESSED IN: 24 plant structures; EXPRESSED DURING: 13 growth stages; Has 149 Blas									1	1	1	1
AT1G65290.1	| Symbols: mtACP2 | mitochondrial acyl carrier protein 2 | chr1:24249088-24250366 REVERSE LENGTH=126
AT1G65320.1	| Symbols: | Cystathionine beta-synthase (CBS) family protein | chr1:24260168-24262644 REVERSE LENGTH=425
AT1G65430.1	| Symbols: ARI8, ATARI8 | IBR domain-containing protein | chr1:24301165-24306159 REVERSE LENGTH=567
AT1G65440.1	| Symbols: GTB1 | global transcription factor group B1 | chr1:24306945-24314327 REVERSE LENGTH=1647
AT1G65520.1	| Symbols: ATECI1, ECI1, ECHIC, PEC11 | delta(3), delta(2)-enoyl CoA isomerase 1 | chr1:24361171-24361893 REVERSE LENGTH=240																	1	1	1	1	1	1	1	1					1	1	1	1
AT1G65560.1	| Symbols: | Zinc-binding dehydrogenase family protein | chr1:24371608-24373673 REVERSE LENGTH=350	1	1	0	0.07													1	1	0	0.07	2	2	0	0.14	2	2	0	0.14	2	2	0	0.14	2	4	0	0.29	2	2	0	0.14	2	2	0	0.14	2	2	0	0.14
AT1G65580.1	| Symbols: FRA3 | Endonuclease/exonuclease/phosphatase family protein | chr1:24377598-24383940 REVERSE LENGTH=1101
AT1G65650.1	| Symbols: UCH2 | Peptidase C12, ubiquitin carboxyl-terminal hydrolase 1 | chr1:24415172-24417466 REVERSE LENGTH=330
AT1G65700.2	| Symbols: | Small nuclear ribonucleoprotein family protein | chr1:24434463-24435870 REVERSE LENGTH=98
AT1G65780.1	| Symbols: | P-loop containing nucleoside triphosphate hydrolases superfamily protein | chr1:24462958-24466888 REVERSE LENGTH=1065
AT1G65810.2	| Symbols: | P-loop containing nucleoside triphosphate hydrolases superfamily protein | chr1:24477043-24480728 REVERSE LENGTH=1016													1	1	1	1									1	1	1	1
AT1G65820.1	| Symbols: | microsomal glutathione s-transferase, putative | chr1:24485213-24486682 FORWARD LENGTH=146					1	1	1	1	1	1	1	1
AT1G65910.1	| Symbols: anac028, NAC028 | NAC domain containing protein 28 | chr1:24520933-24524108 REVERSE LENGTH=631
AT1G65930.1	| Symbols: cICDH | cytosolic NADP+-dependent isocitrate dehydrogenase | chr1:24539088-24541861 FORWARD LENGTH=410					14	15	13	14.05	14	16	14	15.25	2	2	0	1.25	3	3	0	1.68	5	5	4	4.63	6	8	7	7.63	16	17	15	16.25	12	13	11	12.05	39	79	72	75.98	36	65	58	61.78	40	88	79	83.83
AT1G65960.2	| Symbols: GAD2 | glutamate decarboxylase 2 | chr1:24552094-24557253 FORWARD LENGTH=494									1	1	0	0.42
AT1G65970.1	| Symbols: TPX2 | thioredoxin-dependent peroxidase 2 | chr1:24557527-24558229 REVERSE LENGTH=162																									2	2	0	1	1	1	0	0.5	2	2	0	1	4	5	1	2.58	6	7	2	3.65	4	4	1	2.5
AT1G65980.1	| Symbols: TPX1 | thioredoxin-dependent peroxidase 1 | chr1:24559524-24560753 REVERSE LENGTH=162					2	2	2	2	5	7	7	7									2	2	2	2	1	1	1	1	2	2	2	2	3	3	3	3	7	9	8	8.85	9	16	14	15.69	11	25	25	25
AT1G66000.1	| Symbols: | Family of unknown function (DUF577) | chr1:24574344-24575291 FORWARD LENGTH=315
AT1G66020.1	| Symbols: | Terpenoid cyclases/Protein prenyltransferases superfamily protein | chr1:24577576-24579997 FORWARD LENGTH=598
AT1G66050.1	| Symbols: VIM2, ORTH5 | Zinc finger (C3HC4-type RING finger) family protein | chr1:24589534-24592616 FORWARD LENGTH=623
AT1G66070.2	| Symbols: | Translation initiation factor eIF3 subunit | chr1:24596194-24597520 REVERSE LENGTH=226
AT1G66080.1	| Symbols: | unknown protein; CONTAINS InterPro DOMAIN/s: Protein of unknown function DUF775 (InterPro:IPR008493); Has 285 Blast hits to 283 proteins in 133 species: Archae - 0; Bacteria - 0; Metazoa - 120; Fungi - 88; Plants - 50; Viruses - 0; Oth																																	5	5	5	5	2	2	2	2	1	1	1	1
AT1G66130.1	| Symbols: | NAD(P)-binding Rossmann-fold superfamily protein | chr1:24615040-24616742 FORWARD LENGTH=364
AT1G66150.1	| Symbols: TMK1 | transmembrane kinase 1 | chr1:24631503-24634415 FORWARD LENGTH=942									1	1	0	0.03													1	1	1	1
AT1G66200.1	| Symbols: ATGSR2, GSR2, GLN1;2 | glutamine synthase clone F11 | chr1:24655520-24657520 REVERSE LENGTH=356																																	1	1	0	0.07					1	1	0	0.07
AT1G66210.1	| Symbols: | Subtilisin-like serine endopeptidase family protein | chr1:24665735-24668650 REVERSE LENGTH=759
AT1G66240.1	| Symbols: ATX1, ATATX1 | homolog of anti-oxidant 1 | chr1:24686445-24687327 REVERSE LENGTH=106	6	6	6	6	2	2	2	2	1	1	1	1	11	17	17	17	11	14	14	14	9	12	12	12	4	4	4	4	4	5	5	5	2	2	2	2	1	1	1	1	1	1	1	1
AT1G66250.1	| Symbols: | O-Glycosyl hydrolases family 17 protein | chr1:24693063-24695416 FORWARD LENGTH=505																													1	1	1	1					3	3	3	3	1	1	1	1	3	3	3	3
AT1G66260.2	| Symbols: | RNA-binding (RRM/RBD/RNP motifs) family protein | chr1:24695895-24697883 REVERSE LENGTH=295									2	2	2	2									1	1	1	1
AT1G66290.1	| Symbols: | F-box/RNI-like superfamily protein | chr1:24713306-24714843 REVERSE LENGTH=453
AT1G66330.1	| Symbols: | senescence-associated family protein | chr1:24729880-24732144 REVERSE LENGTH=417
AT1G66430.1	| Symbols: | pfkB-like carbohydrate kinase family protein | chr1:24778400-24780393 FORWARD LENGTH=384
AT1G66520.1	| Symbols: pde194 | formyltransferase, putative | chr1:24816330-24818693 REVERSE LENGTH=355
AT1G66530.1	| Symbols: | Arginyl-tRNA synthetase, class Ic | chr1:24819064-24822277 REVERSE LENGTH=590																																					22	26	20	22.46	22	33	25	28.28	26	42	29	34.33
AT1G66540.1	| Symbols: | Cytochrome P450 superfamily protein | chr1:24824837-24826502 FORWARD LENGTH=386
AT1G66580.1	| Symbols: SAG24, RPL10C | senescence associated gene 24 | chr1:24839208-24840439 FORWARD LENGTH=221					3	4	0	1.6	7	13	1	5.8									3	3	1	1.8					1	1	0	0.4
AT1G66590.2	| Symbols: ATCOX19-1, COX19-1 | cytochrome c oxidase 19-1 | chr1:24841606-24842157 FORWARD LENGTH=113																													1	1	1	1	2	2	2	2
AT1G66670.1	| Symbols: CLPP3, NCLPP3 | CLP protease proteolytic subunit 3 | chr1:24863995-24865646 REVERSE LENGTH=309
AT1G66680.1	| Symbols: AR401 | S-adenosyl-L-methionine-dependent methyltransferases superfamily protein | chr1:24866352-24868888 REVERSE LENGTH=358
AT1G66740.1	| Symbols: AtSP7, SP7, SGA2, ASF1A | ASF1 like histone chaperone | chr1:24892586-24893548 FORWARD LENGTH=196
AT1G66750.1	| Symbols: CDKD1;2, CAK4AT, AT;CDKD;2, CDKD;2, CAK4 | CDK-activating kinase 4 | chr1:24894775-24897015 FORWARD LENGTH=348													1	1	1	1	1	1	1	1
AT1G66840.1	| Symbols: PMI2, WEB2 | Plant protein of unknown function (DUF827) | chr1:24933998-24936116 REVERSE LENGTH=607
AT1G66970.2	| Symbols: SVL2 | SHV3-like 2 | chr1:24992746-24996005 REVERSE LENGTH=785
AT1G67040.1	| Symbols: | unknown protein; FUNCTIONS IN: molecular_function unknown; INVOLVED IN: biological_process unknown; LOCATED IN: cellular_component unknown; EXPRESSED IN: 20 plant structures; EXPRESSED DURING: 11 growth stages; BEST Arabidopsis thalian
AT1G67090.1	| Symbols: RBCS1A | ribulose bisphosphate carboxylase small chain 1A | chr1:25048465-25049249 REVERSE LENGTH=180	3	3	1	2.1	1	1	0	0.55	3	3	2	2.55	4	4	4	4	3	3	3	3	4	4	3	3.55	3	3	2	2.55	1	1	0	0.55	5	5	3	4.1	3	3	2	2.55
AT1G67120.1	| Symbols: | ATPases;nucleotide binding;ATP binding;nucleoside-triphosphatases;transcription factor binding | chr1:25069727-25095526 REVERSE LENGTH=5393					3	3	3	3	5	5	5	5									1	1	1	1
AT1G67140.1	| Symbols: SWEETIE | HEAT repeat-containing protein | chr1:25101016-25117372 REVERSE LENGTH=2221
AT1G67280.1	| Symbols: | Glyoxalase/Bleomycin resistance protein/Dioxygenase superfamily protein | chr1:25188563-25190547 REVERSE LENGTH=350													6	6	5	5.45	4	4	3	3.45	11	16	14	14.9	14	27	16	20.95	14	19	15	16.8	11	24	10	16.3	11	11	10	10.45	8	11	7	8.8	1	3	0	1.35
AT1G67310.1	| Symbols: | Calmodulin-binding transcription activator protein with CG-1 and Ankyrin domains | chr1:25198182-25203126 REVERSE LENGTH=1016																																									1	1	1	1
AT1G67320.2	| Symbols: | DNA primase, large subunit family | chr1:25205520-25208966 REVERSE LENGTH=454					1	1	1	1	4	4	4	4
AT1G67360.2	| Symbols: | Rubber elongation factor protein (REF) | chr1:25237072-25237913 REVERSE LENGTH=240					1	1	1	1	1	1	1	1
AT1G67455.1	| Symbols: | F-box and associated interaction domains-containing protein | chr1:25268145-25269475 FORWARD LENGTH=216
AT1G67550.1	| Symbols: URE | urease | chr1:25312842-25316911 FORWARD LENGTH=838
AT1G67630.1	| Symbols: POLA2 | DNA polymerase alpha 2 | chr1:25344573-25348287 REVERSE LENGTH=620
AT1G67680.1	| Symbols: | SRP72 RNA-binding domain | chr1:25365962-25368464 REVERSE LENGTH=664					1	1	1	1	5	6	6	6
AT1G67690.1	| Symbols: | Zincin-like metalloproteases family protein | chr1:25369086-25373730 FORWARD LENGTH=710
AT1G67700.1	| Symbols: | unknown protein; FUNCTIONS IN: molecular_function unknown; INVOLVED IN: biological_process unknown; LOCATED IN: chloroplast, chloroplast envelope; EXPRESSED IN: 22 plant structures; EXPRESSED DURING: 13 growth stages; Has 49 Blast hits													1	1	1	1
AT1G67730.1	| Symbols: YBR159, KCR1, ATKCR1 | beta-ketoacyl reductase 1 | chr1:25391676-25393365 FORWARD LENGTH=318									1	2	2	2
AT1G67830.1	| Symbols: ATFXG1, FXG1 | alpha-fucosidase 1 | chr1:25431705-25432972 REVERSE LENGTH=372	6	8	8	8									5	9	9	9	4	5	5	5	2	2	2	2
AT1G67840.2	| Symbols: CSK | chloroplast sensor kinase | chr1:25434156-25436216 FORWARD LENGTH=445
AT1G67930.1	| Symbols: | Golgi transport complex protein-related | chr1:25474218-25477332 REVERSE LENGTH=832					1	1	1	1	3	3	3	3
AT1G67950.1	| Symbols: | RNA-binding (RRM/RBD/RNP motifs) family protein | chr1:25478884-25480420 REVERSE LENGTH=278																					1	1	1	1	1	1	1	1	3	3	3	3	1	2	2	2					2	2	2	2	1	1	1	1
AT1G68010.1	| Symbols: HPR, ATHPR1 | hydroxypyruvate reductase | chr1:25493418-25495720 FORWARD LENGTH=386																																									1	1	1	1	17	20	20	20
AT1G68060.1	| Symbols: ATMAP70-1, MAP70-1 | microtubule-associated proteins 70-1 | chr1:25511392-25514226 REVERSE LENGTH=622																																					1	1	1	1
AT1G68100.1	| Symbols: IAR1 | ZIP metal ion transporter family | chr1:25521325-25524032 FORWARD LENGTH=469					1	1	1	1	1	1	1	1									1	1	1	1
AT1G68185.1	| Symbols: | Ubiquitin-like superfamily protein | chr1:25556542-25558173 FORWARD LENGTH=215
AT1G68310.2	| Symbols: AE7 | Protein of unknown function (DUF59) | chr1:25599812-25601239 FORWARD LENGTH=157
AT1G68540.1	| Symbols: | NAD(P)-binding Rossmann-fold superfamily protein | chr1:25720066-25721282 FORWARD LENGTH=321																																					9	14	14	14	12	13	13	13	7	7	7	7
AT1G68560.1	| Symbols: ATXYL1, XYL1, TRG1 | alpha-xylosidase 1 | chr1:25734435-25737897 REVERSE LENGTH=915													3	3	3	3	2	2	2	2
AT1G68590.2	| Symbols: | Ribosomal protein PSRP-3/Ycf65 | chr1:25757593-25758169 REVERSE LENGTH=163
AT1G68660.1	| Symbols: | Ribosomal protein L12/ ATP-dependent Clp protease adaptor protein ClpS family protein | chr1:25778058-25779083 REVERSE LENGTH=159													1	1	1	1	2	2	2	2
AT1G68680.1	| Symbols: | unknown protein; FUNCTIONS IN: molecular_function unknown; INVOLVED IN: biological_process unknown; LOCATED IN: chloroplast; EXPRESSED IN: 23 plant structures; EXPRESSED DURING: 16 growth stages; Has 20 Blast hits to 20 proteins in 11					3	3	3	3	1	1	1	1
AT1G68730.1	| Symbols: | Zim17-type zinc finger protein | chr1:25810321-25811128 REVERSE LENGTH=170
AT1G68760.1	| Symbols: ATNUDT1, ATNUDX1, NUDX1 | nudix hydrolase 1 | chr1:25829090-25829607 FORWARD LENGTH=147
AT1G68780.1	| Symbols: | RNI-like superfamily protein | chr1:25831881-25833335 REVERSE LENGTH=432																	1	2	2	2
AT1G68830.1	| Symbols: STN7 | STT7 homolog STN7 | chr1:25872654-25875473 REVERSE LENGTH=562
AT1G69030.1	| Symbols: | BSD domain-containing protein | chr1:25947429-25949262 REVERSE LENGTH=317
AT1G69200.1	| Symbols: FLN2 | fructokinase-like 2 | chr1:26016018-26018365 FORWARD LENGTH=616
AT1G69210.1	| Symbols: | Uncharacterised protein family UPF0090 | chr1:26018583-26020058 REVERSE LENGTH=305
AT1G69230.2	| Symbols: SP1L2 | SPIRAL1-like2 | chr1:26026543-26027085 REVERSE LENGTH=110																									1	1	1	1									1	1	1	1	1	1	1	1	1	1	1	1
AT1G69250.1	| Symbols: | Nuclear transport factor 2 (NTF2) family protein with RNA binding (RRM-RBD-RNP motifs) domain | chr1:26033163-26035301 FORWARD LENGTH=427					7	7	7	7	12	13	13	13									1	1	1	1	1	1	1	1									5	5	5	5	3	3	3	3	4	5	5	5
AT1G69340.1	| Symbols: | appr-1-p processing enzyme family protein | chr1:26066298-26069644 FORWARD LENGTH=562					1	2	2	2
AT1G69370.1	| Symbols: CM3, cm-3 | chorismate mutase 3 | chr1:26080098-26081559 FORWARD LENGTH=316
AT1G69400.1	| Symbols: | Transducin/WD40 repeat-like superfamily protein | chr1:26087027-26088806 FORWARD LENGTH=314
AT1G69410.1	| Symbols: ATELF5A-3, ELF5A-3 | eukaryotic elongation factor 5A-3 | chr1:26089301-26090194 FORWARD LENGTH=158					1	1	1	1	2	3	1	1.61	1	1	1	1					1	1	1	1	1	1	1	1													1	1	1	1
AT1G69440.1	| Symbols: AGO7, ZIP | Argonaute family protein | chr1:26101565-26105016 REVERSE LENGTH=990
AT1G69510.1	| Symbols: | cAMP-regulated phosphoprotein 19-related protein | chr1:26126779-26127725 FORWARD LENGTH=137																					1	1	1	1	2	2	2	2	2	2	2	2
AT1G69620.1	| Symbols: RPL34 | ribosomal protein L34 | chr1:26189900-26191081 FORWARD LENGTH=119					2	2	0	0.83	3	3	1	1.83									2	2	0	0.83
AT1G69710.1	| Symbols: | Regulator of chromosome condensation (RCC1) family with FYVE zinc finger domain | chr1:26222325-26226530 FORWARD LENGTH=1041																									1	1	1	1	1	1	1	1
AT1G69740.1	| Symbols: HEMB1 | Aldolase superfamily protein | chr1:26232197-26234713 FORWARD LENGTH=430									1	1	1	1
AT1G69800.1	| Symbols: | Cystathionine beta-synthase (CBS) protein | chr1:26274416-26276105 REVERSE LENGTH=447																																					1	1	1	1	1	1	1	1	6	9	9	9
AT1G69830.1	| Symbols: ATAMY3, AMY3 | alpha-amylase-like 3 | chr1:26288518-26293003 REVERSE LENGTH=887
AT1G69840.2	| Symbols: | SPFH/Band 7/PHB domain-containing membrane-associated protein family | chr1:26293932-26295150 REVERSE LENGTH=286					2	2	2	2	1	1	1	1
AT1G69940.1	| Symbols: ATPPME1, PPME1 | Pectin lyase-like superfamily protein | chr1:26343549-26344971 REVERSE LENGTH=361									1	1	1	1
AT1G69960.1	| Symbols: PP2A | serine/threonine protein phosphatase 2A | chr1:26348892-26350511 REVERSE LENGTH=307									1	1	0	0.08
AT1G69990.1	| Symbols: | Leucine-rich repeat protein kinase family protein | chr1:26360235-26362010 REVERSE LENGTH=591
AT1G70070.1	| Symbols: EMB25, PDE317, ISE2 | DEAD/DEAH box helicase, putative | chr1:26390016-26394148 REVERSE LENGTH=1171
AT1G70140.1	| Symbols: ATFH8, FH8 | formin 8 | chr1:26412688-26415048 REVERSE LENGTH=760																																									1	1	1	1
AT1G70190.2	| Symbols: | Ribosomal protein L7/L12, oligomerisation;Ribosomal protein L7/L12, C-terminal/adaptor protein ClpS-like | chr1:26430616-26431242 FORWARD LENGTH=208
AT1G70200.1	| Symbols: | RNA-binding (RRM/RBD/RNP motifs) family protein | chr1:26432514-26434351 REVERSE LENGTH=538
AT1G70310.1	| Symbols: SPDS2 | spermidine synthase 2 | chr1:26485497-26487352 REVERSE LENGTH=340
AT1G70320.1	| Symbols: UPL2 | ubiquitin-protein ligase 2 | chr1:26488745-26501281 REVERSE LENGTH=3658					4	4	1	2.99	7	7	1	4.97									1	1	0	0.66
AT1G70410.3	| Symbols: ATBCA4, BCA4 | beta carbonic anhydrase 4 | chr1:26534167-26536505 REVERSE LENGTH=258
AT1G70490.1	| Symbols: ATARFA1D, ARFA1D | Ras-related small GTP-binding family protein | chr1:26564162-26565152 REVERSE LENGTH=181	1	1	0	0.5	10	11	0	5.5	13	24	0	12	12	19	0	9.5	12	14	0	7	10	13	0	6.5	12	15	1	8	8	10	0	5	6	6	0	3	8	9	0	4.5	8	10	0	5	6	6	0	3
AT1G70530.1	| Symbols: CRK3 | cysteine-rich RLK (RECEPTOR-like protein kinase) 3 | chr1:26588750-26591379 REVERSE LENGTH=646	3	5	5	5
AT1G70570.1	| Symbols: | anthranilate phosphoribosyltransferase, putative | chr1:26608719-26612062 FORWARD LENGTH=595									2	2	2	2
AT1G70580.4	| Symbols: AOAT2, GGT2 | alanine-2-oxoglutarate aminotransferase 2 | chr1:26613222-26615845 FORWARD LENGTH=481									1	1	0	0.17					2	2	0	0.33	2	2	1	1.17	2	2	0	0.33	3	4	0	0.67	12	15	2	4.17	6	9	0	1.5	7	10	0	1.67	6	6	0	1
AT1G70600.1	| Symbols: | Ribosomal protein L18e/L15 superfamily protein | chr1:26621168-26621608 REVERSE LENGTH=146					4	4	1	2.5	6	7	1	4									3	3	0	1.5
AT1G70710.1	| Symbols: ATGH9B1, CEL1, GH9B1 | glycosyl hydrolase 9B1 | chr1:26659356-26662962 REVERSE LENGTH=492					8	9	8	8.68	11	14	13	13.68									2	2	2	2
AT1G70730.3	| Symbols: PGM2 | Phosphoglucomutase/phosphomannomutase family protein | chr1:26669020-26673166 REVERSE LENGTH=662													7	8	0	4.09	2	3	0	1.53	5	5	0	2.56	8	10	0	5.11	7	9	0	4.6	6	8	2	5.07	26	31	14	22.69	26	30	14	22.18	34	46	25	35.73
AT1G70770.1	| Symbols: | Protein of unknown function DUF2359, transmembrane | chr1:26688622-26691185 REVERSE LENGTH=610					2	2	2	2	4	4	4	4
AT1G70890.1	| Symbols: MLP43 | MLP-like protein 43 | chr1:26725912-26726489 REVERSE LENGTH=158																					1	1	1	1	1	1	1	1
AT1G70980.1	| Symbols: SYNC3 | Class II aminoacyl-tRNA and biotin synthetases superfamily protein | chr1:26762339-26764394 FORWARD LENGTH=571
AT1G71040.1	| Symbols: LPR2 | Cupredoxin superfamily protein | chr1:26797201-26800224 REVERSE LENGTH=581
AT1G71080.1	| Symbols: | RNA polymerase II transcription elongation factor | chr1:26809987-26811645 REVERSE LENGTH=326																					1	1	1	1
AT1G71100.1	| Symbols: RSW10 | Ribose 5-phosphate isomerase, type A protein | chr1:26814726-26815529 FORWARD LENGTH=267
AT1G71120.1	| Symbols: GLIP6 | GDSL-motif lipase/hydrolase 6 | chr1:26821072-26822420 REVERSE LENGTH=362
AT1G71170.1	| Symbols: | 6-phosphogluconate dehydrogenase family protein | chr1:26830673-26831572 FORWARD LENGTH=299																																									1	1	1	1
AT1G71180.1	| Symbols: | 6-phosphogluconate dehydrogenase family protein | chr1:26832335-26833291 FORWARD LENGTH=318
AT1G71210.1	| Symbols: | Pentatricopeptide repeat (PPR) superfamily protein | chr1:26838850-26841489 REVERSE LENGTH=879
AT1G71220.1	| Symbols: EBS1, UGGT, PSL2 | UDP-glucose:glycoprotein glucosyltransferases;transferases, transferring hexosyl groups;transferases, transferring glycosyl groups | chr1:26841664-26851730 FORWARD LENGTH=1613
AT1G71230.1	| Symbols: CSN5B, CSN5, AJH2 | COP9-signalosome 5B | chr1:26852560-26854255 FORWARD LENGTH=358
AT1G71270.1	| Symbols: POK, TTD8, ATVPS52 | Vps52 / Sac2 family | chr1:26863736-26869817 FORWARD LENGTH=707
AT1G71310.2	| Symbols: | cobalt ion binding | chr1:26878717-26879844 REVERSE LENGTH=176
AT1G71350.1	| Symbols: | eukaryotic translation initiation factor SUI1 family protein | chr1:26888525-26891209 REVERSE LENGTH=597
AT1G71380.1	| Symbols: ATGH9B3, ATCEL3, CEL3 | cellulase 3 | chr1:26899989-26901749 REVERSE LENGTH=484					2	2	2	2	8	11	11	11
AT1G71410.1	| Symbols: | ARM repeat superfamily protein | chr1:26913070-26917515 REVERSE LENGTH=909																																									1	1	1	1
AT1G71440.1	| Symbols: PFI, TFC E | tubulin folding cofactor E / Pfifferling (PFI) | chr1:26921271-26924373 REVERSE LENGTH=531
AT1G71460.1	| Symbols: | Pentatricopeptide repeat (PPR-like) superfamily protein | chr1:26928247-26930316 REVERSE LENGTH=689
AT1G71500.1	| Symbols: | Rieske (2Fe-2S) domain-containing protein | chr1:26936084-26937331 FORWARD LENGTH=287					1	1	1	1	1	1	1	1
AT1G71530.1	| Symbols: | Protein kinase superfamily protein | chr1:26939766-26942306 FORWARD LENGTH=655
AT1G71697.1	| Symbols: ATCK1, CK, CK1 | choline kinase 1 | chr1:26971537-26973177 FORWARD LENGTH=346
AT1G71720.1	| Symbols: | Nucleic acid-binding proteins superfamily | chr1:26983744-26985893 FORWARD LENGTH=500
AT1G71730.1	| Symbols: | unknown protein; Has 52 Blast hits to 52 proteins in 24 species: Archae - 0; Bacteria - 0; Metazoa - 4; Fungi - 0; Plants - 41; Viruses - 0; Other Eukaryotes - 7 (source: NCBI BLink). | chr1:26986298-26986831 REVERSE LENGTH=177
AT1G71750.1	| Symbols: HGPT | Hypoxanthine-guanine phosphoribosyltransferase | chr1:26987954-26989144 REVERSE LENGTH=188																																													2	2	2	2
AT1G71770.2	| Symbols: PAB5 | poly(A)-binding protein 5 | chr1:26990777-26993489 REVERSE LENGTH=682					1	1	1	1	2	2	2	2																									1	1	0	0.28					1	1	0	0.28
AT1G71790.1	| Symbols: | Subunits of heterodimeric actin filament capping protein Capz superfamily | chr1:26996869-26998785 FORWARD LENGTH=256
AT1G71820.1	| Symbols: SEC6 | SEC6 | chr1:27010022-27016745 FORWARD LENGTH=752
AT1G71840.1	| Symbols: | transducin family protein / WD-40 repeat family protein | chr1:27022424-27024380 FORWARD LENGTH=407
AT1G71850.1	| Symbols: | Ubiquitin carboxyl-terminal hydrolase family protein | chr1:27024875-27026287 REVERSE LENGTH=470
AT1G71860.1	| Symbols: PTP1, ATPTP1 | protein tyrosine phosphatase 1 | chr1:27026866-27028675 FORWARD LENGTH=340									1	1	1	1																																	12	14	14	14
AT1G71920.3	| Symbols: HISN6B | HISTIDINE BIOSYNTHESIS 6B | chr1:27067333-27068999 FORWARD LENGTH=362
AT1G71930.1	| Symbols: VND7, ANAC030 | vascular related NAC-domain protein 7 | chr1:27076205-27077829 FORWARD LENGTH=324
AT1G71950.1	| Symbols: | Proteinase inhibitor, propeptide | chr1:27080453-27081573 REVERSE LENGTH=136																													1	1	1	1									1	1	1	1
AT1G72000.1	| Symbols: | Plant neutral invertase family protein | chr1:27103277-27105663 FORWARD LENGTH=499
AT1G72150.1	| Symbols: PATL1 | PATELLIN 1 | chr1:27148558-27150652 FORWARD LENGTH=573
AT1G72160.1	| Symbols: | Sec14p-like phosphatidylinositol transfer family protein | chr1:27153823-27155609 REVERSE LENGTH=490
AT1G72170.1	| Symbols: | Domain of unknown function (DUF543) | chr1:27156403-27157516 FORWARD LENGTH=102					2	2	2	2	2	2	2	2
AT1G72230.1	| Symbols: | Cupredoxin superfamily protein | chr1:27188287-27189093 FORWARD LENGTH=181													7	18	18	18	4	8	8	8	5	9	9	9					1	1	1	1
AT1G72250.2	| Symbols: | Di-glucose binding protein with Kinesin motor domain | chr1:27192902-27198118 FORWARD LENGTH=1203
AT1G72300.1	| Symbols: | Leucine-rich receptor-like protein kinase family protein | chr1:27217679-27220966 REVERSE LENGTH=1095
AT1G72320.1	| Symbols: APUM23, PUM23 | pumilio 23 | chr1:27228984-27232580 REVERSE LENGTH=753
AT1G72330.1	| Symbols: ALAAT2 | alanine aminotransferase 2 | chr1:27233637-27236571 FORWARD LENGTH=540
AT1G72340.1	| Symbols: | NagB/RpiA/CoA transferase-like superfamily protein | chr1:27236898-27238482 FORWARD LENGTH=382
AT1G72370.1	| Symbols: P40, AP40, RP40, RPSAA | 40s ribosomal protein SA | chr1:27243148-27244842 REVERSE LENGTH=298	4	5	1	4.56	16	37	26	35.78	20	54	38	52.22					2	2	0	1.78	15	26	20	25.33					1	1	0	0.89	4	4	1	3.67	7	9	6	8.67	9	12	10	11.78	13	21	14	20.22
AT1G72390.1	| Symbols: | CONTAINS InterPro DOMAIN/s: Spt20 family (InterPro:IPR021950); Has 8778 Blast hits to 7244 proteins in 477 species: Archae - 6; Bacteria - 326; Metazoa - 4198; Fungi - 1506; Plants - 923; Viruses - 22; Other Eukaryotes - 1797 (source:
AT1G72410.2	| Symbols: | COP1-interacting protein-related | chr1:27251535-27256246 REVERSE LENGTH=1270													1	1	1	1	1	2	2	2
AT1G72440.1	| Symbols: EDA25, SWA2 | CCAAT-binding factor | chr1:27268325-27273596 REVERSE LENGTH=1043					1	1	1	1	4	4	4	4
AT1G72550.1	| Symbols: | tRNA synthetase beta subunit family protein | chr1:27319947-27323908 REVERSE LENGTH=598									2	2	2	2
AT1G72560.2	| Symbols: PSD | ARM repeat superfamily protein | chr1:27325026-27329467 REVERSE LENGTH=988
AT1G72680.1	| Symbols: ATCAD1, CAD1 | cinnamyl-alcohol dehydrogenase | chr1:27359346-27360876 REVERSE LENGTH=355													20	34	34	34	16	25	25	25	19	32	32	32	21	33	33	33	20	27	27	27	11	12	12	12	8	8	8	8	8	11	11	11	9	10	10	10
AT1G72710.1	| Symbols: CKL2 | casein kinase 1-like protein 2 | chr1:27372553-27376178 FORWARD LENGTH=465									2	2	2	2
AT1G72730.1	| Symbols: | DEA(D/H)-box RNA helicase family protein | chr1:27378040-27379593 REVERSE LENGTH=414	6	6	0	1.58	12	15	2	5.43	13	21	1	6.43	1	1	0	0.29	1	1	0	0.29	12	17	0	4.75	2	2	0	0.57	2	2	0	0.57	2	2	0	0.57	7	7	0	1.85	7	7	0	1.69	4	4	0	1.16
AT1G72750.1	| Symbols: ATTIM23-2, TIM23-2 | translocase inner membrane subunit 23-2 | chr1:27383577-27384143 FORWARD LENGTH=188					1	1	1	1	1	1	1	1
AT1G72810.1	| Symbols: | Pyridoxal-5'-phosphate-dependent enzyme family protein | chr1:27398760-27400393 REVERSE LENGTH=516																																													4	6	6	6
AT1G72850.1	| Symbols: | Disease resistance protein (TIR-NBS class) | chr1:27413971-27415335 FORWARD LENGTH=422									1	1	1	1
AT1G72870.1	| Symbols: | Disease resistance protein (TIR-NBS class) | chr1:27421086-27422999 FORWARD LENGTH=512
AT1G72880.1	| Symbols: | Survival protein SurE-like phosphatase/nucleotidase | chr1:27423678-27425928 REVERSE LENGTH=385
AT1G72910.1	| Symbols: | Toll-Interleukin-Resistance (TIR) domain-containing protein | chr1:27435634-27436887 FORWARD LENGTH=380	2	2	2	2
AT1G72940.1	| Symbols: | Toll-Interleukin-Resistance (TIR) domain-containing protein | chr1:27442278-27443487 FORWARD LENGTH=371
AT1G73010.1	| Symbols: ATPS2, PS2 | phosphate starvation-induced gene 2 | chr1:27464780-27466180 REVERSE LENGTH=295
AT1G73030.1	| Symbols: VPS46.2, CHMP1A | SNF7 family protein | chr1:27473938-27474848 FORWARD LENGTH=203
AT1G73060.1	| Symbols: LPA3 | Low PSII Accumulation 3 | chr1:27479027-27481258 FORWARD LENGTH=358
AT1G73080.1	| Symbols: PEPR1, ATPEPR1 | PEP1 receptor 1 | chr1:27484513-27488021 FORWARD LENGTH=1123													3	3	3	3					1	1	1	1
AT1G73090.1	| Symbols: | unknown protein; Has 28 Blast hits to 28 proteins in 12 species: Archae - 0; Bacteria - 0; Metazoa - 0; Fungi - 0; Plants - 28; Viruses - 0; Other Eukaryotes - 0 (source: NCBI BLink). | chr1:27488264-27490593 FORWARD LENGTH=306
AT1G73110.1	| Symbols: | P-loop containing nucleoside triphosphate hydrolases superfamily protein | chr1:27494344-27496844 REVERSE LENGTH=432									1	1	1	1
AT1G73180.2	| Symbols: | Eukaryotic translation initiation factor eIF2A family protein | chr1:27518335-27521014 FORWARD LENGTH=484													1	1	1	1					8	8	8	8	8	12	12	12	7	9	9	9	9	12	12	12	2	2	2	2	3	3	3	3
AT1G73230.1	| Symbols: | Nascent polypeptide-associated complex NAC | chr1:27540506-27541364 REVERSE LENGTH=165					6	7	6	6.42	6	7	7	7
AT1G73250.1	| Symbols: ATFX, GER1 | GDP-4-keto-6-deoxymannose-3,5-epimerase-4-reductase 1 | chr1:27545213-27546360 REVERSE LENGTH=323									1	1	1	1													2	2	0	0.7	1	1	0	0.35	2	2	0	0.7	5	5	0	1.75	4	5	1	2.4	5	6	4	4.7
AT1G73300.1	| Symbols: scpl2 | serine carboxypeptidase-like 2 | chr1:27559673-27562048 REVERSE LENGTH=441
AT1G73430.1	| Symbols: | sec34-like family protein | chr1:27604096-27610829 FORWARD LENGTH=784									1	2	2	2
AT1G73450.1	| Symbols: | Protein kinase superfamily protein | chr1:27613856-27618635 FORWARD LENGTH=1152
AT1G73590.1	| Symbols: PIN1, ATPIN1 | Auxin efflux carrier family protein | chr1:27659772-27662876 FORWARD LENGTH=622					2	3	3	3	2	2	2	2
AT1G73600.1	| Symbols: | S-adenosyl-L-methionine-dependent methyltransferases superfamily protein | chr1:27670825-27673400 FORWARD LENGTH=490
AT1G73630.1	| Symbols: | EF hand calcium-binding protein family | chr1:27684748-27685239 FORWARD LENGTH=163
AT1G73650.4	| Symbols: | Protein of unknown function (DUF1295) | chr1:27688420-27689606 REVERSE LENGTH=219					1	1	1	1
AT1G73660.1	| Symbols: | protein tyrosine kinase family protein | chr1:27692247-27696718 REVERSE LENGTH=1030																																													2	2	2	2
AT1G73670.1	| Symbols: ATMPK15, MPK15 | MAP kinase 15 | chr1:27700212-27703168 FORWARD LENGTH=576
AT1G73720.1	| Symbols: SMU1 | transducin family protein / WD-40 repeat family protein | chr1:27725059-27729722 FORWARD LENGTH=511
AT1G73850.1	| Symbols: | Protein of unknown function (DUF1666) | chr1:27767375-27770386 FORWARD LENGTH=635
AT1G73880.1	| Symbols: UGT89B1 | UDP-glucosyl transferase 89B1 | chr1:27785143-27786564 FORWARD LENGTH=473																																													1	1	1	1
AT1G73940.1	| Symbols: | unknown protein; BEST Arabidopsis thaliana protein match is: unknown protein (TAIR:AT5G49410.2); Has 54 Blast hits to 54 proteins in 11 species: Archae - 0; Bacteria - 0; Metazoa - 0; Fungi - 0; Plants - 54; Viruses - 0; Other Eukaryot					1	1	1	1
AT1G74020.1	| Symbols: SS2 | strictosidine synthase 2 | chr1:27835289-27837277 REVERSE LENGTH=335					4	4	4	4	2	2	2	2	1	1	1	1													1	1	1	1	1	1	1	1
AT1G74030.1	| Symbols: ENO1 | enolase 1 | chr1:27839465-27841901 REVERSE LENGTH=477																																					12	17	15	15.52	11	15	15	15	19	31	31	31
AT1G74040.1	| Symbols: IMS1, MAML-3, IPMS2 | 2-isopropylmalate synthase 1 | chr1:27842258-27845566 FORWARD LENGTH=631					1	1	0	0.53	3	4	0	2.11																													1	1	0	0.53
AT1G74060.1	| Symbols: | Ribosomal protein L6 family protein | chr1:27850033-27851299 REVERSE LENGTH=233					14	22	5	13.5	13	30	11	20.5									7	13	2	7.5					1	3	0	1.5
AT1G74090.1	| Symbols: SOT18, ATSOT18, ATST5B | desulfo-glucosinolate sulfotransferase 18 | chr1:27863003-27864055 FORWARD LENGTH=350																																	1	1	0	0.73	1	1	0	0.73					1	1	0	0.73
AT1G74100.1	| Symbols: SOT16, ATSOT16, CORI-7, ATST5A | sulfotransferase 16 | chr1:27864489-27865505 REVERSE LENGTH=338
AT1G74180.1	| Symbols: AtRLP14, RLP14 | receptor like protein 14 | chr1:27897197-27900908 REVERSE LENGTH=976					1	1	1	1	1	1	1	1
AT1G74210.1	| Symbols: | PLC-like phosphodiesterases superfamily protein | chr1:27910396-27912785 FORWARD LENGTH=392
AT1G74230.1	| Symbols: GR-RBP5 | glycine-rich RNA-binding protein 5 | chr1:27915346-27916857 FORWARD LENGTH=289
AT1G74250.1	| Symbols: | DNAJ heat shock N-terminal domain-containing protein | chr1:27920328-27922414 FORWARD LENGTH=630
AT1G74260.1	| Symbols: PUR4 | purine biosynthesis 4 | chr1:27923005-27927764 REVERSE LENGTH=1407																																													1	1	1	1
AT1G74270.1	| Symbols: | Ribosomal protein L35Ae family protein | chr1:27928415-27929466 REVERSE LENGTH=112					4	7	3	4.6	5	11	3	6.2									1	1	0	0.4
AT1G74300.1	| Symbols: | alpha/beta-Hydrolases superfamily protein | chr1:27935368-27936474 FORWARD LENGTH=346
AT1G74310.1	| Symbols: ATHSP101, HSP101, HOT1 | heat shock protein 101 | chr1:27936715-27939862 REVERSE LENGTH=911
AT1G74320.1	| Symbols: | Protein kinase superfamily protein | chr1:27941192-27942903 FORWARD LENGTH=350
AT1G74470.1	| Symbols: | Pyridine nucleotide-disulphide oxidoreductase family protein | chr1:27991248-27992845 FORWARD LENGTH=467					7	8	8	8	5	6	6	6									1	1	1	1
AT1G74530.3	| Symbols: | unknown protein; Has 35333 Blast hits to 34131 proteins in 2444 species: Archae - 798; Bacteria - 22429; Metazoa - 974; Fungi - 991; Plants - 531; Viruses - 0; Other Eukaryotes - 9610 (source: NCBI BLink). | chr1:28009723-28012044 REVE																																	6	7	7	7					6	7	7	7
AT1G74560.1	| Symbols: NRP1 | NAP1-related protein 1 | chr1:28017815-28019900 REVERSE LENGTH=256
AT1G74700.1	| Symbols: NUZ, TRZ1 | tRNAse Z1 | chr1:28065345-28067130 FORWARD LENGTH=280
AT1G74720.1	| Symbols: QKY | C2 calcium/lipid-binding plant phosphoribosyltransferase family protein | chr1:28075173-28078418 FORWARD LENGTH=1081
AT1G74770.1	| Symbols: | zinc ion binding | chr1:28089695-28094834 REVERSE LENGTH=1259																																													1	1	1	1
AT1G74790.1	| Symbols: | catalytics | chr1:28098912-28101673 FORWARD LENGTH=695
AT1G74850.1	| Symbols: PTAC2 | plastid transcriptionally active 2 | chr1:28119237-28122314 REVERSE LENGTH=862
AT1G74910.3	| Symbols: | ADP-glucose pyrophosphorylase family protein | chr1:28135852-28138456 REVERSE LENGTH=387									4	4	2	3.2	1	1	1	1	2	2	1	1.6	6	6	5	5.6	4	4	4	4	5	5	4	4.6	9	10	8	9.2	1	1	0	0.6	1	1	1	1
AT1G74920.1	| Symbols: ALDH10A8 | aldehyde dehydrogenase 10A8 | chr1:28139175-28142573 REVERSE LENGTH=501
AT1G74960.2	| Symbols: FAB1, KAS2 | fatty acid biosynthesis 1 | chr1:28152564-28155948 REVERSE LENGTH=541					1	1	1	1													1	1	1	1													3	3	3	3	3	3	3	3	4	4	4	4
AT1G74970.1	| Symbols: RPS9, TWN3 | ribosomal protein S9 | chr1:28157761-28159202 REVERSE LENGTH=208									2	3	3	3
AT1G75200.1	| Symbols: | flavodoxin family protein / radical SAM domain-containing protein | chr1:28220849-28223597 REVERSE LENGTH=647					1	1	1	1	1	1	1	1
AT1G75210.1	| Symbols: | HAD-superfamily hydrolase, subfamily IG, 5'-nucleotidase | chr1:28223990-28228751 FORWARD LENGTH=642
AT1G75270.1	| Symbols: DHAR2 | dehydroascorbate reductase 2 | chr1:28250255-28251237 REVERSE LENGTH=213													6	7	7	7	5	5	5	5	11	19	19	19	13	19	19	19	12	17	17	17	9	15	15	15	7	7	7	7	4	6	6	6	2	2	2	2
AT1G75280.1	| Symbols: | NmrA-like negative transcriptional regulator family protein | chr1:28252030-28253355 FORWARD LENGTH=310													1	1	1	1	2	2	2	2	9	10	10	10	16	24	24	24	11	13	13	13	14	28	28	28	14	14	14	14	13	16	16	16	9	11	11	11
AT1G75330.1	| Symbols: OTC | ornithine carbamoyltransferase | chr1:28266457-28268383 REVERSE LENGTH=375
AT1G75340.1	| Symbols: | Zinc finger C-x8-C-x5-C-x3-H type family protein | chr1:28269153-28271873 REVERSE LENGTH=435	1	1	1	1									2	2	2	2	1	1	1	1
AT1G75350.1	| Symbols: emb2184 | Ribosomal protein L31 | chr1:28272163-28272687 FORWARD LENGTH=144									2	3	3	3	1	1	1	1	1	1	1	1									1	2	2	2
AT1G75440.1	| Symbols: UBC16 | ubiquitin-conjugating enzyme 16 | chr1:28313623-28314960 FORWARD LENGTH=161	1	2	2	2													1	1	1	1
AT1G75500.1	| Symbols: WAT1 | Walls Are Thin 1 | chr1:28338282-28340091 REVERSE LENGTH=389					1	1	1	1	1	1	1	1
AT1G75510.1	| Symbols: | Transcription initiation factor IIF, beta subunit | chr1:28347254-28348629 REVERSE LENGTH=261
AT1G75560.2	| Symbols: | zinc knuckle (CCHC-type) family protein | chr1:28371420-28372717 REVERSE LENGTH=257									1	1	1	1
AT1G75630.2	| Symbols: AVA-P4 | vacuolar H+-pumping ATPase 16 kDa proteolipid subunit 4 | chr1:28400662-28402032 FORWARD LENGTH=200					1	1	1	1	6	7	7	7
AT1G75660.1	| Symbols: XRN3, AtXRN3 | 5'-3' exoribonuclease 3 | chr1:28408289-28414825 FORWARD LENGTH=1020
AT1G75680.1	| Symbols: AtGH9B7, GH9B7 | glycosyl hydrolase 9B7 | chr1:28417215-28419231 REVERSE LENGTH=525					2	2	2	2	1	1	1	1
AT1G75780.1	| Symbols: TUB1 | tubulin beta-1 chain | chr1:28451378-28453602 REVERSE LENGTH=447	4	4	0	0.36	18	27	1	4.21	20	38	0	5.47					1	1	0	0.09									2	2	0	0.18	3	3	0	0.27									3	3	0	0.27
AT1G75850.1	| Symbols: VPS35B | VPS35 homolog B | chr1:28478053-28483874 REVERSE LENGTH=790
AT1G75950.1	| Symbols: SKP1, ASK1, ATSKP1, SKP1A, UIP1 | S phase kinase-associated protein 1 | chr1:28516715-28517454 FORWARD LENGTH=160									1	2	2	2																													1	1	1	1
AT1G75980.1	| Symbols: | Single hybrid motif superfamily protein | chr1:28522936-28524302 REVERSE LENGTH=225
AT1G75990.1	| Symbols: | PAM domain (PCI/PINT associated module) protein | chr1:28524623-28526718 REVERSE LENGTH=487					8	8	3	4.82	10	13	6	8.55									7	8	2	4.18
AT1G76010.1	| Symbols: | Alba DNA/RNA-binding protein | chr1:28528505-28530488 REVERSE LENGTH=350					5	5	5	5	6	7	6	6.47									1	1	1	1
AT1G76020.1	| Symbols: | Thioredoxin superfamily protein | chr1:28532243-28533542 REVERSE LENGTH=225																																	1	1	1	1									1	1	1	1
AT1G76030.1	| Symbols: | ATPase, V1 complex, subunit B protein | chr1:28534134-28536916 FORWARD LENGTH=486					16	18	3	13.38	16	19	3	14.08									3	3	0	2.08									1	1	0	0.69
AT1G76060.1	| Symbols: EMB1793 | LYR family of Fe/S cluster biogenesis protein | chr1:28543367-28543840 REVERSE LENGTH=157
AT1G76070.1	| Symbols: | unknown protein; FUNCTIONS IN: molecular_function unknown; INVOLVED IN: biological_process unknown; LOCATED IN: plasma membrane; EXPRESSED IN: 8 plant structures; EXPRESSED DURING: LP.04 four leaves visible, 4 anthesis, petal different
AT1G76080.1	| Symbols: ATCDSP32, CDSP32 | chloroplastic drought-induced stress protein of 32 kD | chr1:28548063-28549348 REVERSE LENGTH=302																																													1	1	1	1
AT1G76140.1	| Symbols: | Prolyl oligopeptidase family protein | chr1:28571187-28574852 FORWARD LENGTH=795
AT1G76150.1	| Symbols: ECH2, ATECH2 | enoyl-CoA hydratase 2 | chr1:28575236-28577637 REVERSE LENGTH=309																									3	3	3	3	4	4	4	4	13	17	17	17	9	10	10	10	8	8	8	8	1	1	1	1
AT1G76160.1	| Symbols: sks5 | SKU5 similar 5 | chr1:28578211-28581020 REVERSE LENGTH=541	12	16	12	14.88	5	6	4	5.25	2	2	1	1.62	16	31	23	28	15	23	18	21.12	18	37	31	34.75	4	5	2	3.88	3	3	1	2.25	1	1	0	0.62	2	2	0	1.25	3	4	0	2.5	1	1	0	0.62
AT1G76180.1	| Symbols: ERD14 | Dehydrin family protein | chr1:28587013-28587657 REVERSE LENGTH=185	1	1	1	1	2	2	1	1.55	4	4	3	3.55					1	1	1	1	2	2	1	1.55	1	1	0	0.55	4	4	3	3.55	2	2	1	1.55	3	5	4	4.55	3	4	3	3.55	5	6	5	5.55
AT1G76190.1	| Symbols: | SAUR-like auxin-responsive protein family | chr1:28592225-28592596 FORWARD LENGTH=123
AT1G76260.1	| Symbols: DWA2 | DWD (DDB1-binding WD40 protein) hypersensitive to ABA 2 | chr1:28610363-28612998 FORWARD LENGTH=350
AT1G76300.1	| Symbols: SmD3 | snRNP core protein SMD3 | chr1:28625957-28627080 FORWARD LENGTH=128					2	2	1	1.44	2	3	1	1.89	1	1	1	1					1	1	1	1																	1	1	1	1	1	1	1	1
AT1G76320.2	| Symbols: FRS4 | FAR1-related sequence 4 | chr1:28631404-28633886 FORWARD LENGTH=730																																													1	1	1	1
AT1G76450.1	| Symbols: | Photosystem II reaction center PsbP family protein | chr1:28684618-28686109 FORWARD LENGTH=247																	1	1	1	1	2	4	4	4	5	7	7	7	2	3	3	3
AT1G76460.1	| Symbols: | RNA-binding (RRM/RBD/RNP motifs) family protein | chr1:28686932-28688506 REVERSE LENGTH=285
AT1G76490.1	| Symbols: HMG1, HMGR1, AtHMGR1 | hydroxy methylglutaryl CoA reductase 1 | chr1:28695801-28698206 FORWARD LENGTH=642									1	1	1	1
AT1G76550.1	| Symbols: | Phosphofructokinase family protein | chr1:28722900-28726929 REVERSE LENGTH=617									3	3	1	2													3	3	0	1.5	1	1	0	0.5	8	10	0	5	13	16	2	9	14	19	4	11.5	23	30	15	22.5
AT1G76630.2	| Symbols: | Tetratricopeptide repeat (TPR)-like superfamily protein | chr1:28759699-28765042 FORWARD LENGTH=1168					5	6	6	6	2	2	2	2
AT1G76680.1	| Symbols: OPR1, ATOPR1 | 12-oxophytodienoate reductase 1 | chr1:28776982-28778271 FORWARD LENGTH=372													6	8	1	4.43	4	4	0	1.96	11	12	6	8.94	26	33	27	29.94	18	27	22	24.45	29	47	38	42.41	18	20	13	16.43	18	28	25	26.47	16	21	19	19.98
AT1G76690.1	| Symbols: OPR2, ATOPR2 | 12-oxophytodienoate reductase 2 | chr1:28778976-28780355 FORWARD LENGTH=374													22	29	22	25.57	15	16	12	14.04	22	41	35	38.06	11	11	5	8.06	9	9	4	6.55	12	16	7	11.59	7	7	0	3.57	3	3	0	1.53	2	2	0	1.02
AT1G76720.1	| Symbols: | eukaryotic translation initiation factor 2 (eIF-2) family protein | chr1:28794144-28798780 REVERSE LENGTH=1191
AT1G76760.1	| Symbols: ATY1, TRX-Y1, TY1 | thioredoxin Y1 | chr1:28811873-28812948 REVERSE LENGTH=172																									3	4	4	4	1	1	1	1	1	1	1	1					1	1	1	1
AT1G76810.1	| Symbols: | eukaryotic translation initiation factor 2 (eIF-2) family protein | chr1:28831366-28836310 REVERSE LENGTH=1294					1	1	1	1	2	2	2	2									1	1	1	1
AT1G76860.1	| Symbols: | Small nuclear ribonucleoprotein family protein | chr1:28854594-28855637 REVERSE LENGTH=98									1	1	1	1
AT1G76970.1	| Symbols: | Target of Myb protein 1 | chr1:28922841-28924854 REVERSE LENGTH=446
AT1G77060.1	| Symbols: | Phosphoenolpyruvate carboxylase family protein | chr1:28951804-28953449 REVERSE LENGTH=339
AT1G77090.1	| Symbols: | Mog1/PsbP/DUF1795-like photosystem II reaction center PsbP family protein | chr1:28960576-28961875 REVERSE LENGTH=260																					4	5	5	5	7	8	8	8	5	7	7	7	3	4	4	4
AT1G77120.1	| Symbols: ADH1, ADH, ATADH, ATADH1 | alcohol dehydrogenase 1 | chr1:28975509-28977216 FORWARD LENGTH=379	3	3	3	3	6	8	8	8	11	15	15	15									4	4	4	4	1	1	1	1	1	1	1	1	1	1	1	1	5	6	6	6	3	4	4	4	11	21	21	21
AT1G77122.1	| Symbols: | Uncharacterised protein family UPF0090 | chr1:28977427-28978674 REVERSE LENGTH=323
AT1G77140.1	| Symbols: VPS45, ATVPS45 | vacuolar protein sorting 45 | chr1:28984163-28987681 FORWARD LENGTH=569									1	1	1	1	2	2	2	2	3	3	3	3	6	6	6	6
AT1G77180.2	| Symbols: SKIP | chromatin protein family | chr1:28999791-29001632 REVERSE LENGTH=613					3	3	3	3	3	3	3	3	1	1	1	1	2	2	2	2	4	5	5	5	3	3	3	3	2	2	2	2					5	5	5	5	3	3	3	3
AT1G77330.1	| Symbols: | 2-oxoglutarate (2OG) and Fe(II)-dependent oxygenase superfamily protein | chr1:29063215-29064447 REVERSE LENGTH=307
AT1G77370.1	| Symbols: | Glutaredoxin family protein | chr1:29073916-29074642 FORWARD LENGTH=130													2	3	3	3	3	3	3	3	1	1	1	1
AT1G77440.2	| Symbols: PBC2 | 20S proteasome beta subunit C2 | chr1:29096020-29098105 FORWARD LENGTH=204																													2	2	0	0.91
AT1G77460.1	| Symbols: | Armadillo/beta-catenin-like repeat ; C2 calcium/lipid-binding domain (CaLB) protein | chr1:29104378-29111580 FORWARD LENGTH=2136
AT1G77470.1	| Symbols: RFC3, RFC5 | replication factor C subunit 3 | chr1:29112194-29114323 REVERSE LENGTH=369									2	2	2	2
AT1G77480.1	| Symbols: | Eukaryotic aspartyl protease family protein | chr1:29114705-29117150 REVERSE LENGTH=466
AT1G77490.1	| Symbols: TAPX | thylakoidal ascorbate peroxidase | chr1:29117688-29120046 FORWARD LENGTH=426																																	1	1	0	0.06	2	3	0	0.17	2	2	0	0.11	2	2	1	1.06
AT1G77510.1	| Symbols: ATPDIL1-2, PDI6, ATPDI6, PDIL1-2 | PDI-like 1-2 | chr1:29126742-29129433 FORWARD LENGTH=508					2	2	2	2	1	1	1	1
AT1G77540.1	| Symbols: | Acyl-CoA N-acyltransferases (NAT) superfamily protein | chr1:29137762-29138182 REVERSE LENGTH=114	1	1	1	1	1	1	1	1									1	1	1	1	1	2	2	2	1	1	1	1
AT1G77550.1	| Symbols: | tubulin-tyrosine ligases;tubulin-tyrosine ligases | chr1:29138490-29142965 REVERSE LENGTH=855
AT1G77590.1	| Symbols: LACS9 | long chain acyl-CoA synthetase 9 | chr1:29148501-29151776 REVERSE LENGTH=691					1	1	1	1	2	2	2	2									1	1	1	1
AT1G77630.1	| Symbols: | Peptidoglycan-binding LysM domain-containing protein | chr1:29173726-29175387 FORWARD LENGTH=423																																					1	1	0	0.5	1	1	0	0.5	1	1	0	0.5
AT1G77670.1	| Symbols: | Pyridoxal phosphate (PLP)-dependent transferases superfamily protein | chr1:29189043-29190901 REVERSE LENGTH=440																																	11	20	20	20	13	16	16	16	11	15	15	15	5	5	5	5
AT1G77680.1	| Symbols: | Ribonuclease II/R family protein | chr1:29192188-29195963 REVERSE LENGTH=1055
AT1G77710.1	| Symbols: | CONTAINS InterPro DOMAIN/s: Ubiquitin-like, Ufm1 (InterPro:IPR005375); Has 244 Blast hits to 244 proteins in 106 species: Archae - 0; Bacteria - 0; Metazoa - 149; Fungi - 0; Plants - 47; Viruses - 0; Other Eukaryotes - 48 (source: NCBI	4	10	10	10	3	20	20	20	3	12	12	12	2	2	2	2
AT1G77750.1	| Symbols: | Ribosomal protein S13/S18 family | chr1:29230346-29231490 REVERSE LENGTH=154									2	2	2	2
AT1G77760.1	| Symbols: NIA1, GNR1, NR1 | nitrate reductase 1 | chr1:29236005-29239367 REVERSE LENGTH=917																																													1	1	1	1
AT1G77870.1	| Symbols: MUB5 | membrane-anchored ubiquitin-fold protein 5 precursor | chr1:29285177-29285714 FORWARD LENGTH=120
AT1G77940.1	| Symbols: | Ribosomal protein L7Ae/L30e/S12e/Gadd45 family protein | chr1:29304116-29305288 REVERSE LENGTH=112					7	12	3	7.5	7	17	6	11.5									5	7	3	5					1	1	0	0.5
AT1G78010.1	| Symbols: | tRNA modification GTPase, putative | chr1:29333535-29336297 FORWARD LENGTH=560
AT1G78040.2	| Symbols: | Pollen Ole e 1 allergen and extensin family protein | chr1:29345993-29346840 FORWARD LENGTH=171																					1	1	1	1																	1	1	1	1
AT1G78060.1	| Symbols: | Glycosyl hydrolase family protein | chr1:29349796-29352868 REVERSE LENGTH=767	7	8	8	8	1	1	1	1	3	3	3	3	50	73	73	73	27	31	31	31	31	37	37	37	20	23	23	23	14	17	17	17	10	12	12	12	16	20	20	20	17	19	19	19	11	13	13	13
AT1G78090.1	| Symbols: ATTPPB, TPPB | trehalose-6-phosphate phosphatase | chr1:29373955-29376295 FORWARD LENGTH=374
AT1G78150.1	| Symbols: | unknown protein; BEST Arabidopsis thaliana protein match is: unknown protein (TAIR:AT1G35780.1); Has 152 Blast hits to 146 proteins in 18 species: Archae - 0; Bacteria - 0; Metazoa - 1; Fungi - 2; Plants - 149; Viruses - 0; Other Eukar					2	2	2	2					4	6	6	6	6	6	6	6	4	7	7	7	4	5	5	5	4	5	5	5	8	11	11	11	4	4	4	4	3	3	3	3	4	4	4	4
AT1G78170.1	| Symbols: | unknown protein; BEST Arabidopsis thaliana protein match is: unknown protein (TAIR:AT1G22250.1); Has 66 Blast hits to 66 proteins in 11 species: Archae - 0; Bacteria - 0; Metazoa - 0; Fungi - 0; Plants - 66; Viruses - 0; Other Eukaryot
AT1G78190.1	| Symbols: | Trm112p-like protein | chr1:29418620-29418994 REVERSE LENGTH=124
AT1G78280.1	| Symbols: | transferases, transferring glycosyl groups | chr1:29452823-29457118 FORWARD LENGTH=943
AT1G78300.1	| Symbols: GRF2, 14-3-3OMEGA, GF14 OMEGA | general regulatory factor 2 | chr1:29461883-29463052 FORWARD LENGTH=259	2	2	0	0.19	4	4	1	1.54	4	5	1	1.88
AT1G78380.1	| Symbols: ATGSTU19, GST8, GSTU19 | glutathione S-transferase TAU 19 | chr1:29486659-29487819 REVERSE LENGTH=219									2	2	2	2									7	8	7	7.74	12	18	16	17.49	9	13	12	12.74	15	34	32	33.49	20	42	40	41.49	18	38	33	36.49	23	49	47	48.49
AT1G78510.1	| Symbols: SPS1 | solanesyl diphosphate synthase 1 | chr1:29535410-29537163 REVERSE LENGTH=406
AT1G78570.1	| Symbols: RHM1, ROL1, ATRHM1 | rhamnose biosynthesis 1 | chr1:29550110-29552207 FORWARD LENGTH=669					1	1	0	0.4	7	8	3	5.38	2	3	0	1.43	2	2	0	1.03					3	3	1	1.8	2	2	0	0.8	3	3	0	1.2	4	4	0	1.6	4	5	0	2	4	9	0	3.83
AT1G78590.1	| Symbols: NADK3, ATNADK-3 | NAD(H) kinase 3 | chr1:29564343-29566128 FORWARD LENGTH=317																																													1	1	1	1
AT1G78630.1	| Symbols: emb1473 | Ribosomal protein L13 family protein | chr1:29575997-29577406 FORWARD LENGTH=241					1	1	1	1	3	3	3	3
AT1G78660.2	| Symbols: ATGGH1, GGH1 | gamma-glutamyl hydrolase 1 | chr1:29586014-29588117 FORWARD LENGTH=347																																					1	1	1	1
AT1G78670.1	| Symbols: ATGGH3, GGH3 | gamma-glutamyl hydrolase 3 | chr1:29591053-29593319 FORWARD LENGTH=352																																	2	2	2	2	1	1	1	1	2	3	3	3	1	1	1	1
AT1G78680.1	| Symbols: ATGGH2, GGH2 | gamma-glutamyl hydrolase 2 | chr1:29593933-29596037 FORWARD LENGTH=347													10	14	14	14	4	6	6	6	4	6	6	6	5	7	7	7	2	3	3	3	2	2	2	2	2	2	2	2	2	2	2	2
AT1G78690.1	| Symbols: | Phospholipid/glycerol acyltransferase family protein | chr1:29597002-29598409 FORWARD LENGTH=284									1	1	1	1
AT1G78730.1	| Symbols: | FBD, F-box, Skp2-like and Leucine Rich Repeat domains containing protein | chr1:29607840-29609441 REVERSE LENGTH=420
AT1G78760.1	| Symbols: | F-box/RNI-like superfamily protein | chr1:29615174-29616738 REVERSE LENGTH=452																																													1	1	1	1
AT1G78770.1	| Symbols: APC6 | anaphase promoting complex 6 | chr1:29617421-29621273 FORWARD LENGTH=543
AT1G78780.1	| Symbols: | pathogenesis-related family protein | chr1:29621447-29622153 REVERSE LENGTH=176
AT1G78820.1	| Symbols: | D-mannose binding lectin protein with Apple-like carbohydrate-binding domain | chr1:29634401-29635768 REVERSE LENGTH=455					2	2	0	0.67	2	4	0	1.33	3	3	2	2.33	2	2	1	1.33	2	3	0	1	2	2	1	1.33	4	5	2	3	1	1	0	0.33	9	12	4	6.67	11	16	9	11.33	4	9	2	4.33
AT1G78830.1	| Symbols: | Curculin-like (mannose-binding) lectin family protein | chr1:29637141-29638508 REVERSE LENGTH=455					2	2	0	1.33	7	10	6	8.67	2	2	1	1.67	1	1	0	0.67	4	6	3	5	7	8	7	7.67	6	7	4	6	5	7	6	6.67	15	20	12	17.33	13	17	10	14.67	10	16	9	13.67
AT1G78850.1	| Symbols: | D-mannose binding lectin protein with Apple-like carbohydrate-binding domain | chr1:29642072-29643397 REVERSE LENGTH=441					3	3	3	3	2	2	2	2																					2	2	2	2					2	2	2	2	1	1	1	1
AT1G78870.2	| Symbols: UBC35, UBC13A | ubiquitin-conjugating enzyme 35 | chr1:29650589-29652203 FORWARD LENGTH=153									1	1	0	0.5	12	25	7	16	10	18	6	12	13	26	8	17	7	8	2	5	5	7	3	5	8	10	4	7					1	1	1	1	1	1	1	1
AT1G78900.1	| Symbols: VHA-A | vacuolar ATP synthase subunit A | chr1:29660463-29664575 FORWARD LENGTH=623	1	1	1	1	28	34	34	34	36	41	41	41									10	10	10	10
AT1G78920.2	| Symbols: AVP2, AVPL1, AtVHP2;1, VHP2;1, VP2 | vacuolar H+-pyrophosphatase 2 | chr1:29672340-29676761 FORWARD LENGTH=802	1	1	1	1	1	1	1	1	2	2	2	2									1	1	1	1
AT1G79000.2	| Symbols: HAC1 | histone acetyltransferase of the CBP family 1 | chr1:29716639-29723984 REVERSE LENGTH=1741
AT1G79010.1	| Symbols: | Alpha-helical ferredoxin | chr1:29725138-29726933 REVERSE LENGTH=222					3	3	3	3	2	2	2	2
AT1G79050.1	| Symbols: | recA DNA recombination family protein | chr1:29737084-29740140 REVERSE LENGTH=439					1	1	1	1	1	1	1	1
AT1G79090.2	| Symbols: | FUNCTIONS IN: molecular_function unknown; INVOLVED IN: biological_process unknown; LOCATED IN: cellular_component unknown; EXPRESSED IN: 25 plant structures; EXPRESSED DURING: 15 growth stages; CONTAINS InterPro DOMAIN/s: Topoisomerase									1	1	1	1					1	1	1	1
AT1G79210.2	| Symbols: | N-terminal nucleophile aminohydrolases (Ntn hydrolases) superfamily protein | chr1:29796286-29798240 REVERSE LENGTH=235
AT1G79230.3	| Symbols: ST1, ATMST1, MST1, ATRDH1 | mercaptopyruvate sulfurtransferase 1 | chr1:29801358-29803679 FORWARD LENGTH=322									2	2	1	1.79									3	3	3	3	3	4	4	4	3	3	3	3	7	11	10	10.79	5	5	4	4.79	4	6	6	6	7	8	7	7.79
AT1G79260.1	| Symbols: | CONTAINS InterPro DOMAIN/s: Domain of unknown function DUF1794 (InterPro:IPR014878); Has 30201 Blast hits to 17322 proteins in 780 species: Archae - 12; Bacteria - 1396; Metazoa - 17338; Fungi - 3422; Plants - 5037; Viruses - 0; Other													2	2	2	2	3	3	3	3	2	3	3	3	7	8	8	8	3	3	3	3	5	6	6	6	4	4	4	4	4	6	6	6	2	2	2	2
AT1G79270.1	| Symbols: ECT8 | evolutionarily conserved C-terminal region 8 | chr1:29816157-29818811 FORWARD LENGTH=528																																													1	1	1	1
AT1G79280.2	| Symbols: NUA | nuclear pore anchor | chr1:29819176-29832809 REVERSE LENGTH=2115									5	5	5	5
AT1G79340.1	| Symbols: AtMC4, MC4 | metacaspase 4 | chr1:29842849-29844368 FORWARD LENGTH=418					1	1	1	1
AT1G79350.1	| Symbols: EMB1135 | RING/FYVE/PHD zinc finger superfamily protein | chr1:29844829-29853215 REVERSE LENGTH=1295
AT1G79380.1	| Symbols: | Ca(2)-dependent phospholipid-binding protein (Copine) family | chr1:29860812-29863023 FORWARD LENGTH=401																																													2	2	2	2
AT1G79400.1	| Symbols: ATCHX2, CHX2 | cation/H+ exchanger 2 | chr1:29864992-29867840 FORWARD LENGTH=783
AT1G79440.1	| Symbols: ALDH5F1, SSADH1, SSADH | aldehyde dehydrogenase 5F1 | chr1:29882525-29887275 REVERSE LENGTH=528
AT1G79460.1	| Symbols: GA2, KS, ATKS, ATKS1, KS1 | Terpenoid cyclases/Protein prenyltransferases superfamily protein | chr1:29890568-29894436 FORWARD LENGTH=785
AT1G79470.1	| Symbols: | Aldolase-type TIM barrel family protein | chr1:29894772-29896661 REVERSE LENGTH=503									2	2	0	0.9
AT1G79500.1	| Symbols: AtkdsA1 | Aldolase-type TIM barrel family protein | chr1:29903604-29905989 FORWARD LENGTH=290																									1	1	1	1	3	3	3	3	1	1	0	0.67	8	10	9	9.67	8	8	6	7.33	10	11	7	9.67
AT1G79530.1	| Symbols: GAPCP-1 | glyceraldehyde-3-phosphate dehydrogenase of plastid 1 | chr1:29916232-29919088 REVERSE LENGTH=422					6	6	2	4.15	10	13	7	10.23									6	7	5	6.08									1	1	1	1	4	4	2	3.08	5	5	3	4.08	4	4	2	3.08
AT1G79540.1	| Symbols: | Pentatricopeptide repeat (PPR) superfamily protein | chr1:29920334-29922676 REVERSE LENGTH=780																													1	1	1	1
AT1G79550.1	| Symbols: PGK | phosphoglycerate kinase | chr1:29924347-29926295 REVERSE LENGTH=401					3	5	5	5	5	5	5	5	20	31	28	29.94	14	23	21	22.15	42	328	297	316.79	41	326	302	316.67	42	250	226	241.11	32	106	93	101.35	16	25	23	24.15	22	38	33	36.09	15	21	16	19.53
AT1G79560.1	| Symbols: EMB156, EMB36, EMB1047, FTSH12 | FTSH protease 12 | chr1:29926976-29932308 FORWARD LENGTH=1008
AT1G79570.1	| Symbols: | Protein kinase superfamily protein with octicosapeptide/Phox/Bem1p domain | chr1:29932856-29937540 REVERSE LENGTH=1248																					1	1	0	0.1
AT1G79590.1	| Symbols: SYP52, ATSYP52 | syntaxin of plants 52 | chr1:29947064-29948304 FORWARD LENGTH=233													1	1	1	1	1	1	1	1
AT1G79650.1	| Symbols: RAD23, RAD23B | Rad23 UV excision repair protein family | chr1:29972406-29975132 REVERSE LENGTH=371	5	7	3	4.33	3	5	2	3	1	1	1	1	2	2	1	1.33					1	1	1	1
AT1G79690.1	| Symbols: atnudt3, NUDT3 | nudix hydrolase homolog 3 | chr1:29985360-29990171 FORWARD LENGTH=772																																													1	1	1	1
AT1G79730.1	| Symbols: ELF7 | hydroxyproline-rich glycoprotein family protein | chr1:30000743-30003969 REVERSE LENGTH=589									1	1	1	1
AT1G79750.1	| Symbols: ATNADP-ME4, NADP-ME4 | NADP-malic enzyme 4 | chr1:30007655-30011179 REVERSE LENGTH=646
AT1G79830.1	| Symbols: GC5 | golgin candidate 5 | chr1:30028110-30033508 REVERSE LENGTH=956
AT1G79850.1	| Symbols: RPS17, CS17, PRPS17 | ribosomal protein S17 | chr1:30041473-30041922 REVERSE LENGTH=149
AT1G79870.1	| Symbols: | D-isomer specific 2-hydroxyacid dehydrogenase family protein | chr1:30044794-30045851 FORWARD LENGTH=313																																													4	6	6	6
AT1G79880.1	| Symbols: | RNA recognition motif (RRM)-containing protein | chr1:30046222-30048336 REVERSE LENGTH=399
AT1G79920.1	| Symbols: | Heat shock protein 70 (Hsp 70) family protein | chr1:30058935-30062224 REVERSE LENGTH=831									6	6	1	3.55																													2	2	0	1.02
AT1G79930.1	| Symbols: HSP91 | heat shock protein 91 | chr1:30063781-30067067 REVERSE LENGTH=831									5	5	0	2.45																													2	2	0	0.98
AT1G79940.1	| Symbols: ATERDJ2A | DnaJ / Sec63 Brl domains-containing protein | chr1:30070023-30073237 FORWARD LENGTH=687					1	1	1	1	1	1	1	1
AT1G79990.5	| Symbols: | structural molecules | chr1:30085910-30091949 FORWARD LENGTH=912					2	2	0	0.86	7	7	2	4.16									3	5	0	2.16					1	1	0	0.43
AT1G80070.1	| Symbols: SUS2, EMB33, EMB177, EMB14 | Pre-mRNA-processing-splicing factor | chr1:30118052-30127574 FORWARD LENGTH=2359					16	16	16	16	33	36	36	36									5	5	5	5
AT1G80090.1	| Symbols: | Cystathionine beta-synthase (CBS) family protein | chr1:30130104-30131855 FORWARD LENGTH=402
AT1G80110.1	| Symbols: ATPP2-B11, PP2-B11 | phloem protein 2-B11 | chr1:30135466-30136767 FORWARD LENGTH=257
AT1G80120.1	| Symbols: | Protein of unknown function (DUF567) | chr1:30139198-30139986 FORWARD LENGTH=210
AT1G80210.1	| Symbols: BRCC36A, AtBRCC36A | Mov34/MPN/PAD-1 family protein | chr1:30163357-30165628 REVERSE LENGTH=406
AT1G80230.1	| Symbols: | Rubredoxin-like superfamily protein | chr1:30169784-30170999 REVERSE LENGTH=171
AT1G80270.1	| Symbols: PPR596 | PENTATRICOPEPTIDE REPEAT 596 | chr1:30181265-30183331 FORWARD LENGTH=596					3	3	3	3	4	4	4	4									1	1	1	1
AT1G80290.2	| Symbols: | Nucleotide-diphospho-sugar transferases superfamily protein | chr1:30188420-30189574 FORWARD LENGTH=337
AT1G80300.1	| Symbols: NTT1, ATNTT1 | nucleotide transporter 1 | chr1:30191954-30194280 FORWARD LENGTH=624					1	1	0	0.67	4	4	2	3.33
AT1G80340.1	| Symbols: GA4H, ATGA3OX2, GA3OX2 | gibberellin 3-oxidase 2 | chr1:30200695-30202163 REVERSE LENGTH=347
AT1G80350.1	| Symbols: ERH3, AAA1, FRA2, LUE1, ATKTN1, KTN1, FRC2, BOT1, FTR | P-loop containing nucleoside triphosphate hydrolases superfamily protein | chr1:30205499-30208050 REVERSE LENGTH=523
AT1G80360.1	| Symbols: | Pyridoxal phosphate (PLP)-dependent transferases superfamily protein | chr1:30208736-30210643 REVERSE LENGTH=394					2	2	2	2	8	12	12	12
AT1G80380.4	| Symbols: | P-loop containing nucleoside triphosphate hydrolases superfamily protein | chr1:30217332-30219784 FORWARD LENGTH=450																																					16	20	20	20	14	19	19	19	17	22	22	22
AT1G80410.1	| Symbols: EMB2753 | tetratricopeptide repeat (TPR)-containing protein | chr1:30227963-30234832 REVERSE LENGTH=897					22	22	22	22	29	33	33	33									6	7	7	7													1	1	1	1	1	1	1	1	1	1	1	1
AT1G80420.1	| Symbols: ATXRCC1 | BRCT domain-containing DNA repair protein | chr1:30235444-30237163 REVERSE LENGTH=353
AT1G80460.2	| Symbols: NHO1, GLI1 | Actin-like ATPase superfamily protein | chr1:30246960-30249055 REVERSE LENGTH=482									4	4	4	4									1	1	1	1					1	1	1	1	2	2	2	2	5	5	5	5	5	5	5	5	4	4	4	4
AT1G80480.1	| Symbols: PTAC17 | plastid transcriptionally active 17 | chr1:30258272-30260570 REVERSE LENGTH=444									2	2	2	2
AT1G80490.2	| Symbols: TPR1 | TOPLESS-related 1 | chr1:30261094-30266446 REVERSE LENGTH=1120	4	4	0	1.04	1	1	0	0.22	5	5	0	1.33	44	55	11	26.66	28	30	4	13.51	39	50	8	23.92	37	46	9	21.95	23	28	4	12.18	17	21	5	9.9	8	9	2	3.19	7	7	1	2.76	2	2	0	0.48
AT1G80500.1	| Symbols: | SNARE-like superfamily protein | chr1:30271195-30272431 FORWARD LENGTH=135					1	1	1	1	1	1	1	1
AT1G80550.1	| Symbols: | Pentatricopeptide repeat (PPR) superfamily protein | chr1:30285358-30286704 REVERSE LENGTH=448
AT1G80560.1	| Symbols: ATIMD2, IMD2 | isopropylmalate dehydrogenase 2 | chr1:30287833-30290126 FORWARD LENGTH=405					2	2	0	0.78	6	7	0	2.72									3	3	0	1.17													3	4	0	1.56	5	7	3	4.56	14	18	8	12.5
AT1G80570.2	| Symbols: | RNI-like superfamily protein | chr1:30290661-30292231 FORWARD LENGTH=480									1	1	1	1
AT1G80600.1	| Symbols: WIN1 | HOPW1-1-interacting 1 | chr1:30298675-30300513 REVERSE LENGTH=457																																													2	3	3	3
AT1G80620.1	| Symbols: | S15/NS1, RNA-binding protein | chr1:30305404-30307182 FORWARD LENGTH=414									1	2	2	2
AT1G80660.1	| Symbols: AHA9, HA9 | H(+)-ATPase 9 | chr1:30316227-30319948 REVERSE LENGTH=954					2	2	1	1.08	1	1	0	0.08
AT1G80670.1	| Symbols: | Transducin/WD40 repeat-like superfamily protein | chr1:30320809-30323543 REVERSE LENGTH=349	8	10	10	10	5	6	6	6	3	3	3	3	7	7	7	7	5	5	5	5	7	8	8	8
AT1G80680.1	| Symbols: SAR3, MOS3, PRE, NUP96 | SUPPRESSOR OF AUXIN RESISTANCE 3 | chr1:30324219-30328489 FORWARD LENGTH=1046
AT1G80700.1	| Symbols: | unknown protein; FUNCTIONS IN: molecular_function unknown; INVOLVED IN: biological_process unknown; LOCATED IN: mitochondrion; BEST Arabidopsis thaliana protein match is: unknown protein (TAIR:AT1G80980.1); Has 476 Blast hits to 340 pr
AT1G80720.1	| Symbols: | Mitochondrial glycoprotein family protein | chr1:30336289-30337347 FORWARD LENGTH=190
AT1G80750.1	| Symbols: | Ribosomal protein L30/L7 family protein | chr1:30349052-30350434 FORWARD LENGTH=247					2	2	2	2	1	1	1	1
AT1G80840.1	| Symbols: WRKY40, ATWRKY40 | WRKY DNA-binding protein 40 | chr1:30383834-30385356 FORWARD LENGTH=302
AT1G80910.1	| Symbols: | Protein of unknown function (DUF1712) | chr1:30401143-30403466 FORWARD LENGTH=497
AT1G80930.1	| Symbols: | MIF4G domain-containing protein / MA3 domain-containing protein | chr1:30405774-30409499 REVERSE LENGTH=900					2	2	2	2	3	3	3	3
AT1G80960.3	| Symbols: | F-box and Leucine Rich Repeat domains containing protein | chr1:30416065-30418220 FORWARD LENGTH=462																					1	1	1	1
AT2G01050.1	| Symbols: | zinc ion binding;nucleic acid binding | chr2:68337-69884 REVERSE LENGTH=515
AT2G01140.1	| Symbols: | Aldolase superfamily protein | chr2:95006-96491 REVERSE LENGTH=391	2	2	2	2	3	3	3	3	4	5	4	4.35									1	1	1	1									1	1	1	1	4	5	4	4.35	1	1	1	1	13	23	22	22.35
AT2G01190.1	| Symbols: | Octicosapeptide/Phox/Bem1p family protein | chr2:115023-117296 FORWARD LENGTH=720					1	1	1	1																					2	2	2	2	3	3	3	3
AT2G01210.1	| Symbols: | Leucine-rich repeat protein kinase family protein | chr2:119509-121734 REVERSE LENGTH=716													1	1	1	1	1	1	1	1					1	1	1	1					1	1	1	1
AT2G01220.2	| Symbols: | Nucleotidylyl transferase superfamily protein | chr2:123301-126213 FORWARD LENGTH=388
AT2G01250.1	| Symbols: | Ribosomal protein L30/L7 family protein | chr2:132943-134264 REVERSE LENGTH=242					11	17	11	14.75	11	27	20	24.38									8	12	10	11.25
AT2G01270.1	| Symbols: AtQSOX2, QSOX2 | quiescin-sulfhydryl oxidase 2 | chr2:139457-142141 FORWARD LENGTH=495	2	2	2	2
AT2G01290.1	| Symbols: RPI2 | ribose-5-phosphate isomerase 2 | chr2:149192-149989 REVERSE LENGTH=265
AT2G01320.3	| Symbols: | ABC-2 type transporter family protein | chr2:154487-158063 REVERSE LENGTH=728					3	4	4	4	1	1	1	1
AT2G01330.2	| Symbols: | nucleotide binding | chr2:158417-160755 REVERSE LENGTH=611
AT2G01340.1	| Symbols: At17.1 | Encodes a protein whose expression is responsive to nematode infection. | chr2:164014-165068 FORWARD LENGTH=215
AT2G01350.4	| Symbols: QPT | quinolinate phoshoribosyltransferase | chr2:165332-167058 REVERSE LENGTH=327					1	1	1	1	1	1	1	1
AT2G01410.1	| Symbols: | NHL domain-containing protein | chr2:175209-176372 REVERSE LENGTH=387					1	1	1	1
AT2G01470.1	| Symbols: STL2P, ATSEC12 | SEC12P-like 2 protein | chr2:212215-214435 REVERSE LENGTH=393					3	3	3	3	4	4	4	4
AT2G01490.1	| Symbols: | phytanoyl-CoA dioxygenase (PhyH) family protein | chr2:221316-223187 FORWARD LENGTH=283													1	1	1	1					12	18	18	18	12	18	18	18	16	20	20	20	20	28	28	28	8	9	9	9	7	8	8	8	3	5	5	5
AT2G01600.1	| Symbols: | ENTH/ANTH/VHS superfamily protein | chr2:268975-272356 FORWARD LENGTH=571					3	3	3	3	1	1	1	1
AT2G01630.1	| Symbols: | O-Glycosyl hydrolases family 17 protein | chr2:279541-281955 REVERSE LENGTH=501																					1	2	2	2	1	1	1	1	1	1	1	1	4	4	4	4	4	4	4	4	2	3	3	3
AT2G01650.1	| Symbols: PUX2 | plant UBX domain-containing protein 2 | chr2:284851-286394 REVERSE LENGTH=458
AT2G01660.1	| Symbols: PDLP6 | plasmodesmata-located protein 6 | chr2:290973-292496 REVERSE LENGTH=288																					1	1	1	1
AT2G01690.1	| Symbols: | ARM repeat superfamily protein | chr2:309144-313499 REVERSE LENGTH=743					11	12	12	12	20	22	22	22									5	5	5	5
AT2G01720.1	| Symbols: | Ribophorin I | chr2:317193-320016 REVERSE LENGTH=464					2	2	2	2	4	4	4	4
AT2G01750.1	| Symbols: ATMAP70-3, MAP70-3 | microtubule-associated proteins 70-3 | chr2:328351-331848 FORWARD LENGTH=629					1	1	1	1									1	1	1	1	1	1	1	1																					1	1	1	1
AT2G01755.1	| Symbols: | unknown protein; FUNCTIONS IN: molecular_function unknown; INVOLVED IN: biological_process unknown; LOCATED IN: chloroplast; Has 120 Blast hits to 120 proteins in 52 species: Archae - 0; Bacteria - 80; Metazoa - 0; Fungi - 0; Plants -
AT2G01810.1	| Symbols: | RING/FYVE/PHD zinc finger superfamily protein | chr2:347537-349952 FORWARD LENGTH=697									1	1	1	1
AT2G01820.1	| Symbols: | Leucine-rich repeat protein kinase family protein | chr2:357664-360681 REVERSE LENGTH=943					6	6	6	6	7	7	6	6.68	19	37	37	37	15	30	30	30	15	43	43	43	18	26	26	26	12	22	22	22	15	39	39	39	14	21	21	21	10	18	18	18	2	2	2	2
AT2G01970.1	| Symbols: | Endomembrane protein 70 protein family | chr2:452197-454819 REVERSE LENGTH=592					2	2	2	2	2	2	2	2									1	1	1	1
AT2G02010.1	| Symbols: GAD4 | glutamate decarboxylase 4 | chr2:474375-476495 REVERSE LENGTH=493									3	4	0	0.26									1	1	0	0.07													1	1	0	0.07	1	1	0	0.07
AT2G02040.1	| Symbols: ATPTR2-B, NTR1, PTR2-B, PTR2, ATPTR2 | peptide transporter 2 | chr2:487542-489707 FORWARD LENGTH=585					3	4	4	4
AT2G02050.1	| Symbols: | NADH-ubiquinone oxidoreductase B18 subunit, putative | chr2:490024-490335 FORWARD LENGTH=103	8	9	9	9	5	5	5	5	5	5	5	5	2	3	3	3					4	4	4	4	1	1	1	1
AT2G02100.1	| Symbols: LCR69, PDF2.2 | low-molecular-weight cysteine-rich 69 | chr2:528397-528885 FORWARD LENGTH=77					1	2	2	2
AT2G02160.1	| Symbols: | CCCH-type zinc finger family protein | chr2:553407-555899 REVERSE LENGTH=669													1	1	1	1									1	1	1	1
AT2G02400.1	| Symbols: | NAD(P)-binding Rossmann-fold superfamily protein | chr2:631413-632449 REVERSE LENGTH=318																																													10	14	14	14
AT2G02470.2	| Symbols: AL6 | alfin-like 6 | chr2:652837-654621 FORWARD LENGTH=247									1	1	1	1
AT2G02500.1	| Symbols: ISPD, ATMEPCT, MCT | Nucleotide-diphospho-sugar transferases superfamily protein | chr2:671054-673124 REVERSE LENGTH=302																					1	1	1	1
AT2G02510.1	| Symbols: | NADH dehydrogenase (ubiquinone)s | chr2:673338-673556 FORWARD LENGTH=72					1	1	1	1	1	1	1	1
AT2G02560.2	| Symbols: CAND1, ATCAND1, ETA2, TIP120, HVE | cullin-associated and neddylation dissociated | chr2:690345-697342 FORWARD LENGTH=1217									4	5	5	5
AT2G02680.1	| Symbols: | Cysteine/Histidine-rich C1 domain family protein | chr2:745775-748573 FORWARD LENGTH=649
AT2G02740.1	| Symbols: ATWHY3, PTAC11, WHY3 | ssDNA-binding transcriptional regulator | chr2:769389-770993 FORWARD LENGTH=268					5	5	5	5	4	5	5	5									1	1	1	1	4	4	4	4	1	2	2	2					4	5	4	4.5	3	4	3	3.5	2	2	2	2
AT2G02750.1	| Symbols: | Pentatricopeptide repeat (PPR) superfamily protein | chr2:771641-773482 REVERSE LENGTH=613																																					1	1	1	1
AT2G02760.1	| Symbols: ATUBC2, UBC2 | ubiquiting-conjugating enzyme 2 | chr2:774271-775149 FORWARD LENGTH=152									1	1	1	1																	1	1	1	1									1	1	1	1	2	3	3	3
AT2G02790.1	| Symbols: IQD29 | IQ-domain 29 | chr2:788708-790946 FORWARD LENGTH=636									1	1	1	1
AT2G02860.1	| Symbols: SUT2, ATSUC3, SUC3, ATSUT2 | sucrose transporter 2 | chr2:828546-832296 REVERSE LENGTH=594									2	2	2	2
AT2G02930.1	| Symbols: ATGSTF3, GST16, GSTF3 | glutathione S-transferase F3 | chr2:851348-852106 REVERSE LENGTH=212													11	14	7	9.14	5	6	5	5.36	9	13	8	9.6	7	11	4	6.32	7	12	5	7.13	6	8	2	3.96	3	3	0	0.89	4	5	0	1.42	4	5	0	1.6
AT2G02955.1	| Symbols: MEE12 | maternal effect embryo arrest 12 | chr2:859592-861772 FORWARD LENGTH=666
AT2G03060.1	| Symbols: AGL30 | AGAMOUS-like 30 | chr2:901614-903639 FORWARD LENGTH=332
AT2G03070.1	| Symbols: MED8 | mediator subunit 8 | chr2:905978-908792 FORWARD LENGTH=524																	1	1	1	1
AT2G03120.1	| Symbols: ATSPP, SPP | signal peptide peptidase | chr2:937554-940083 FORWARD LENGTH=344					1	1	1	1	2	4	4	4
AT2G03130.1	| Symbols: | Ribosomal protein L12/ ATP-dependent Clp protease adaptor protein ClpS family protein | chr2:940744-941076 FORWARD LENGTH=110
AT2G03150.1	| Symbols: emb1579 | ATP/GTP-binding protein family | chr2:952313-959004 FORWARD LENGTH=1340									1	1	1	1
AT2G03220.1	| Symbols: FT1, ATFUT1, ATFT1, MUR2 | fucosyltransferase 1 | chr2:970401-972353 REVERSE LENGTH=558
AT2G03230.1	| Symbols: | GCK domain-containing protein | chr2:972917-973375 FORWARD LENGTH=152					2	2	2	2	1	1	1	1
AT2G03270.1	| Symbols: | DNA-binding protein, putative | chr2:994071-995990 FORWARD LENGTH=639					6	7	7	7	5	6	6	6
AT2G03390.1	| Symbols: | uvrB/uvrC motif-containing protein | chr2:1030635-1032354 REVERSE LENGTH=330
AT2G03420.1	| Symbols: | unknown protein; Has 38 Blast hits to 38 proteins in 17 species: Archae - 0; Bacteria - 0; Metazoa - 0; Fungi - 0; Plants - 38; Viruses - 0; Other Eukaryotes - 0 (source: NCBI BLink). | chr2:1035100-1035937 REVERSE LENGTH=170													2	2	2	2	1	1	1	1	1	1	1	1	3	4	4	4	2	2	2	2	2	3	3	3	1	1	1	1	1	1	1	1
AT2G03430.1	| Symbols: | Ankyrin repeat family protein | chr2:1036192-1037536 REVERSE LENGTH=240					1	1	1	1	7	9	9	9									1	1	1	1													2	2	2	2					1	1	1	1
AT2G03440.1	| Symbols: NRP1, ATNRP1 | nodulin-related protein 1 | chr2:1039409-1039972 REVERSE LENGTH=187	8	8	6	6.94	4	4	4	4	3	3	3	3	7	7	6	6.47	8	13	12	12.47	7	11	10	10.47	3	3	3	3	5	6	6	6	1	1	1	1	4	4	3	3.47	4	4	4	4	2	3	2	2.47
AT2G03450.1	| Symbols: PAP9, ATPAP9 | purple acid phosphatase 9 | chr2:1041528-1043569 FORWARD LENGTH=651					2	2	2	2
AT2G03470.1	| Symbols: | ELM2 domain-containing protein | chr2:1045694-1047130 REVERSE LENGTH=450
AT2G03480.2	| Symbols: QUL2 | QUASIMODO2 LIKE 2 | chr2:1051509-1054090 FORWARD LENGTH=595					3	3	3	3	6	6	6	6									1	1	1	1
AT2G03510.1	| Symbols: | SPFH/Band 7/PHB domain-containing membrane-associated protein family | chr2:1066717-1068934 FORWARD LENGTH=356					10	10	10	10	11	15	15	15									9	10	10	10									1	1	1	1
AT2G03640.4	| Symbols: | Nuclear transport factor 2 (NTF2) family protein with RNA binding (RRM-RBD-RNP motifs) domain | chr2:1104525-1106418 REVERSE LENGTH=453					10	11	11	11	8	8	8	8																									1	1	1	1	1	1	1	1	3	3	3	3
AT2G03667.1	| Symbols: | Asparagine synthase family protein | chr2:1114179-1117281 FORWARD LENGTH=610
AT2G03680.1	| Symbols: SPR1, SKU6 | spiral1 | chr2:1121398-1121850 FORWARD LENGTH=119	1	1	1	1	5	10	10	10	3	3	3	3	3	3	3	3	5	5	5	5	3	6	6	6					1	1	1	1	1	2	2	2
AT2G03750.1	| Symbols: | P-loop containing nucleoside triphosphate hydrolases superfamily protein | chr2:1147968-1149023 REVERSE LENGTH=351																																	4	4	4	4	7	8	8	8	10	10	10	10	3	3	3	3
AT2G03760.1	| Symbols: ST, ATST1, RAR047, ST1, AtSOT1, AtSOT12, SOT12 | sulphotransferase 12 | chr2:1149475-1150455 REVERSE LENGTH=326
AT2G03780.1	| Symbols: | Translin family protein | chr2:1152716-1154285 REVERSE LENGTH=287
AT2G03800.1	| Symbols: GEK1 | D-aminoacyl-tRNA deacylases | chr2:1156782-1158695 FORWARD LENGTH=317																									12	17	17	17	6	9	9	9	18	29	29	29	12	18	18	18	10	18	18	18	4	6	6	6
AT2G03820.1	| Symbols: | nonsense-mediated mRNA decay NMD3 family protein | chr2:1165149-1166699 REVERSE LENGTH=516					3	3	3	3	7	9	9	9									4	4	4	4													3	4	4	4	3	3	3	3	4	4	4	4
AT2G03870.2	| Symbols: | Small nuclear ribonucleoprotein family protein | chr2:1180306-1181256 FORWARD LENGTH=99
AT2G03913.1	| Symbols: | Cysteine-rich protein | chr2:1197885-1198249 FORWARD LENGTH=73
AT2G04030.1	| Symbols: CR88, EMB1956, HSP90.5, Hsp88.1, AtHsp90.5 | Chaperone protein htpG family protein | chr2:1281983-1285909 FORWARD LENGTH=780	1	1	1	1	2	2	2	2	24	29	26	27.71									7	8	7	7.64
AT2G04070.1	| Symbols: | MATE efflux family protein | chr2:1353947-1355790 REVERSE LENGTH=476
AT2G04230.1	| Symbols: | FBD, F-box and Leucine Rich Repeat domains containing protein | chr2:1447025-1448678 REVERSE LENGTH=448
AT2G04280.1	| Symbols: | unknown protein; FUNCTIONS IN: molecular_function unknown; INVOLVED IN: biological_process unknown; EXPRESSED IN: 24 plant structures; EXPRESSED DURING: 13 growth stages; BEST Arabidopsis thaliana protein match is: unknown protein (TAI									3	3	3	3
AT2G04305.1	| Symbols: | Magnesium transporter CorA-like family protein | chr2:1501679-1503448 REVERSE LENGTH=434									1	1	1	1
AT2G04350.2	| Symbols: LACS8 | AMP-dependent synthetase and ligase family protein | chr2:1516086-1519178 FORWARD LENGTH=720					2	2	2	2	3	3	3	3
AT2G04390.1	| Symbols: | Ribosomal S17 family protein | chr2:1527911-1528336 FORWARD LENGTH=141					9	10	3	4.4	15	18	2	5.2									4	6	0	1.2
AT2G04400.1	| Symbols: | Aldolase-type TIM barrel family protein | chr2:1531208-1533578 FORWARD LENGTH=402																																	2	2	2	2	8	8	8	8	10	10	10	10	22	38	38	38
AT2G04450.1	| Symbols: ATNUDT6, NUDX6, ATNUDX6, NUDT6 | nudix hydrolase homolog 6 | chr2:1543710-1545319 FORWARD LENGTH=283
AT2G04520.1	| Symbols: | Nucleic acid-binding, OB-fold-like protein | chr2:1574802-1575239 REVERSE LENGTH=145					1	1	1	1	3	4	4	4
AT2G04530.1	| Symbols: CPZ, TRZ2 | Metallo-hydrolase/oxidoreductase superfamily protein | chr2:1576808-1578611 FORWARD LENGTH=354
AT2G04540.1	| Symbols: | Beta-ketoacyl synthase | chr2:1581521-1584635 REVERSE LENGTH=461
AT2G04550.3	| Symbols: IBR5, DSPTP1E | indole-3-butyric acid response 5 | chr2:1588538-1589603 FORWARD LENGTH=178																																	1	1	1	1	1	1	1	1
AT2G04650.1	| Symbols: | ADP-glucose pyrophosphorylase family protein | chr2:1621986-1624486 REVERSE LENGTH=406									2	2	0	0.8					1	1	0	0.4	1	1	0	0.4					1	1	0	0.4	2	2	0	0.8	1	1	0	0.4					1	1	1	1
AT2G04660.1	| Symbols: APC2 | anaphase-promoting complex/cyclosome 2 | chr2:1624933-1629039 FORWARD LENGTH=865
AT2G04690.2	| Symbols: | Pyridoxamine 5'-phosphate oxidase family protein | chr2:1644628-1646035 FORWARD LENGTH=203													2	2	2	2	3	3	3	3	4	6	6	6	5	5	5	5	5	7	7	7	5	6	6	6
AT2G04700.1	| Symbols: | ferredoxin thioredoxin reductase catalytic beta chain family protein | chr2:1646961-1648345 FORWARD LENGTH=146																																	2	2	2	2	3	3	3	3	1	1	1	1	2	3	3	3
AT2G04740.1	| Symbols: | ankyrin repeat family protein | chr2:1657137-1659563 FORWARD LENGTH=578
AT2G04842.1	| Symbols: EMB2761 | threonyl-tRNA synthetase, putative / threonine--tRNA ligase, putative | chr2:1698466-1701271 REVERSE LENGTH=650
AT2G04865.1	| Symbols: | Aminotransferase-like, plant mobile domain family protein | chr2:1712149-1714599 FORWARD LENGTH=667
AT2G05120.1	| Symbols: | Nucleoporin, Nup133/Nup155-like | chr2:1842069-1846858 REVERSE LENGTH=1285
AT2G05170.1	| Symbols: ATVPS11, VPS11 | vacuolar protein sorting 11 | chr2:1870020-1873278 FORWARD LENGTH=932
AT2G05220.1	| Symbols: | Ribosomal S17 family protein | chr2:1894757-1895179 REVERSE LENGTH=140					12	16	9	13.67	22	28	12	22.67									4	6	0	4
AT2G05260.1	| Symbols: | alpha/beta-Hydrolases superfamily protein | chr2:1918730-1919893 FORWARD LENGTH=358
AT2G05310.1	| Symbols: | unknown protein; FUNCTIONS IN: molecular_function unknown; INVOLVED IN: biological_process unknown; LOCATED IN: chloroplast; BEST Arabidopsis thaliana protein match is: unknown protein (TAIR:AT4G13500.1); Has 50 Blast hits to 50 protei									1	1	1	1
AT2G05620.1	| Symbols: PGR5 | proton gradient regulation 5 | chr2:2081204-2081687 REVERSE LENGTH=133					1	1	1	1	1	1	1	1
AT2G05630.1	| Symbols: ATG8D | Ubiquitin-like superfamily protein | chr2:2083211-2084775 REVERSE LENGTH=120	2	3	1	2.33	1	2	0	1.33	1	2	0	1.33	1	2	0	1.33	2	3	0	2	2	2	0	1.33	2	2	1	1.67	1	1	0	0.67	2	2	1	1.67
AT2G05710.1	| Symbols: ACO3 | aconitase 3 | chr2:2141591-2146350 FORWARD LENGTH=990									9	12	6	9.12	1	1	1	1	2	3	2	2.52	2	3	2	2.52	1	1	1	1	2	2	1	1.36	2	2	1	1.52	16	18	11	14.48	11	14	7	10.48	49	123	80	102.15
AT2G05755.1	| Symbols: | Nodulin MtN21 /EamA-like transporter family protein | chr2:2170905-2173646 FORWARD LENGTH=401
AT2G05790.1	| Symbols: | O-Glycosyl hydrolases family 17 protein | chr2:2199450-2201293 FORWARD LENGTH=472													5	5	5	5	4	4	4	4									1	1	1	1
AT2G05830.1	| Symbols: | NagB/RpiA/CoA transferase-like superfamily protein | chr2:2229759-2231839 FORWARD LENGTH=374									1	1	1	1													2	2	2	2	3	3	3	3	10	18	18	18	8	11	11	11	7	8	8	8	9	10	10	10
AT2G05840.1	| Symbols: PAA2 | 20S proteasome subunit PAA2 | chr2:2234226-2236053 FORWARD LENGTH=246									1	1	0	0.55
AT2G05920.1	| Symbols: | Subtilase family protein | chr2:2269831-2272207 REVERSE LENGTH=754	1	1	1	1	8	9	9	9	14	14	14	14	2	3	3	3	1	1	1	1	2	2	2	2	9	10	10	10	6	6	6	6					5	5	5	5	3	3	3	3
AT2G05990.1	| Symbols: MOD1, ENR1 | NAD(P)-binding Rossmann-fold superfamily protein | chr2:2322876-2324867 FORWARD LENGTH=390					1	1	1	1	3	4	4	4	6	6	6	6	6	7	7	7	12	14	14	14	18	32	32	32	20	27	27	27	25	60	60	60	17	30	30	30	19	32	32	32	8	12	12	12
AT2G06040.1	| Symbols: | CONTAINS InterPro DOMAIN/s: Leucine-rich repeat, cysteine-containing subtype (InterPro:IPR006553); BEST Arabidopsis thaliana protein match is: RNI-like superfamily protein (TAIR:AT5G21900.1); Has 5028 Blast hits to 2547 proteins in 240
AT2G06050.3	| Symbols: OPR3 | oxophytodienoate-reductase 3 | chr2:2359240-2361971 REVERSE LENGTH=391													20	34	34	34	17	20	20	20	15	21	21	21	4	4	4	4	5	6	6	6					1	1	1	1
AT2G06210.1	| Symbols: ELF8, VIP6 | binding | chr2:2429108-2436588 REVERSE LENGTH=1091									3	3	3	3
AT2G06510.1	| Symbols: ATRPA1A, RPA1A, RPA70A, ATRPA70A | replication protein A 1A | chr2:2585215-2587601 FORWARD LENGTH=640													3	4	4	4	1	2	2	2	2	3	3	3
AT2G06555.1	| Symbols: | unknown protein; Has 30201 Blast hits to 17322 proteins in 780 species: Archae - 12; Bacteria - 1396; Metazoa - 17338; Fungi - 3422; Plants - 5037; Viruses - 0; Other Eukaryotes - 2996 (source: NCBI BLink). | chr2:2604195-2604832 REVER
AT2G06850.1	| Symbols: EXGT-A1, EXT, XTH4 | xyloglucan endotransglucosylase/hydrolase 4 | chr2:2763619-2765490 FORWARD LENGTH=296									1	1	1	1
AT2G06990.1	| Symbols: HEN2 | RNA helicase, ATP-dependent, SK12/DOB1 protein | chr2:2895135-2900909 FORWARD LENGTH=995
AT2G07050.1	| Symbols: CAS1 | cycloartenol synthase 1 | chr2:2924629-2930295 FORWARD LENGTH=759					3	3	3	3	1	1	1	1
AT2G07240.1	| Symbols: | cysteine-type peptidases;cysteine-type peptidases | chr2:3007102-3011701 REVERSE LENGTH=874																																									1	1	1	1
AT2G07340.2	| Symbols: PFD1 | PREFOLDIN 1 | chr2:3045644-3046606 FORWARD LENGTH=127
AT2G07360.1	| Symbols: | SH3 domain-containing protein | chr2:3047623-3057099 REVERSE LENGTH=1196					2	2	2	2	3	3	3	3
AT2G07440.1	| Symbols: | two-component responsive regulator-related / response regulator protein-related | chr2:3093821-3094750 REVERSE LENGTH=136													1	1	1	1
AT2G07690.1	| Symbols: MCM5 | Minichromosome maintenance (MCM2/3/5) family protein | chr2:3523379-3527388 REVERSE LENGTH=727					2	2	2	2	8	8	8	8									1	1	1	1
AT2G07698.1	| Symbols: | ATPase, F1 complex, alpha subunit protein | chr2:3361474-3364028 FORWARD LENGTH=777					19	25	24	24.64	19	27	27	27									11	11	11	11									2	2	2	2					1	1	1	1	1	1	1	1
AT2G07707.1	| Symbols: | Plant mitochondrial ATPase, F0 complex, subunit 8 protein | chr2:3386292-3386768 FORWARD LENGTH=158					2	2	2	2	4	4	4	4									1	1	1	1
AT2G07715.1	| Symbols: | Nucleic acid-binding, OB-fold-like protein | chr2:3411180-3412694 FORWARD LENGTH=389					1	1	1	1	3	3	3	3
AT2G07727.1	| Symbols: | Di-haem cytochrome, transmembrane;Cytochrome b/b6, C-terminal | chr2:3450863-3452044 FORWARD LENGTH=393					2	2	2	2	2	2	2	2									2	2	2	2
AT2G07806.1	| Symbols: | unknown protein; FUNCTIONS IN: molecular_function unknown; INVOLVED IN: biological_process unknown; LOCATED IN: cellular_component unknown; Has 1 Blast hits to 1 proteins in 1 species: Archae - 0; Bacteria - 0; Metazoa - 0; Fungi - 0;
AT2G07825.1	| Symbols: | unknown protein; Has 30201 Blast hits to 17322 proteins in 780 species: Archae - 12; Bacteria - 1396; Metazoa - 17338; Fungi - 3422; Plants - 5037; Viruses - 0; Other Eukaryotes - 2996 (source: NCBI BLink). | chr2:3474401-3474598 REVER																																	1	1	1	1
AT2G08986.1	| Symbols: | unknown protein; BEST Arabidopsis thaliana protein match is: unknown protein (TAIR:AT1G40104.1); Has 30201 Blast hits to 17322 proteins in 780 species: Archae - 12; Bacteria - 1396; Metazoa - 17338; Fungi - 3422; Plants - 5037; Viruses
AT2G09990.1	| Symbols: | Ribosomal protein S5 domain 2-like superfamily protein | chr2:3781442-3781882 FORWARD LENGTH=146					7	13	4	8.5	7	20	6	13									6	7	1	4
AT2G10950.1	| Symbols: | BSD domain-containing protein | chr2:4315534-4317800 REVERSE LENGTH=336
AT2G11000.1	| Symbols: ATMAK10, MAK10 | MAK10 homologue | chr2:4341328-4347768 REVERSE LENGTH=728
AT2G11890.1	| Symbols: | adenylate cyclases | chr2:4802999-4803631 FORWARD LENGTH=210																																					5	5	5	5	4	5	5	5	6	9	9	9
AT2G12935.1	| Symbols: | unknown protein; Has 30201 Blast hits to 17322 proteins in 780 species: Archae - 12; Bacteria - 1396; Metazoa - 17338; Fungi - 3422; Plants - 5037; Viruses - 0; Other Eukaryotes - 2996 (source: NCBI BLink). | chr2:5315038-5316041 REVER
AT2G13360.2	| Symbols: AGT, AGT1, SGAT | alanine:glyoxylate aminotransferase | chr2:5539417-5540902 REVERSE LENGTH=401													1	1	1	1					13	18	18	18	18	26	26	26	13	17	17	17	8	12	12	12	1	1	1	1	2	3	3	3
AT2G13440.1	| Symbols: | glucose-inhibited division family A protein | chr2:5593270-5598296 REVERSE LENGTH=723
AT2G13540.1	| Symbols: ENS, ABH1, CBP80, ATCBP80 | ARM repeat superfamily protein | chr2:5637053-5642813 FORWARD LENGTH=848
AT2G13560.1	| Symbols: NAD-ME1 | NAD-dependent malic enzyme 1 | chr2:5650089-5655103 FORWARD LENGTH=623									3	3	3	3
AT2G13770.1	| Symbols: | CONTAINS InterPro DOMAIN/s: Putative harbinger transposase-derived nuclease (InterPro:IPR006912); Has 451 Blast hits to 352 proteins in 33 species: Archae - 0; Bacteria - 0; Metazoa - 28; Fungi - 8; Plants - 388; Viruses - 0; Other Euk
AT2G13820.1	| Symbols: | Bifunctional inhibitor/lipid-transfer protein/seed storage 2S albumin superfamily protein | chr2:5774295-5776279 REVERSE LENGTH=169													1	1	1	1	2	2	2	2	2	2	2	2	1	1	1	1	2	2	2	2	2	2	2	2
AT2G13950.1	| Symbols: | Cysteine/Histidine-rich C1 domain family protein | chr2:5857536-5859249 FORWARD LENGTH=517
AT2G14050.1	| Symbols: MCM9 | minichromosome maintenance 9 | chr2:5909240-5913817 FORWARD LENGTH=646
AT2G14110.1	| Symbols: | Haloacid dehalogenase-like hydrolase (HAD) superfamily protein | chr2:5952005-5953002 FORWARD LENGTH=190									1	1	1	1	1	1	1	1	1	2	2	2					1	1	1	1
AT2G14120.3	| Symbols: DRP3B | dynamin related protein | chr2:5954253-5960015 REVERSE LENGTH=809									3	3	1	1.67
AT2G14170.2	| Symbols: ALDH6B2 | aldehyde dehydrogenase 6B2 | chr2:5977727-5981489 REVERSE LENGTH=498
AT2G14260.2	| Symbols: PIP | proline iminopeptidase | chr2:6041441-6043475 REVERSE LENGTH=329
AT2G14560.2	| Symbols: LURP1 | Protein of unknown function (DUF567) | chr2:6214150-6214773 FORWARD LENGTH=179																																													1	1	1	1
AT2G14720.2	| Symbols: VSR4, VSR2;1, BP80-2;1, MTV4 | vacuolar sorting receptor 4 | chr2:6300878-6304156 REVERSE LENGTH=628					7	9	1	4.2	5	6	0	2.2
AT2G14740.2	| Symbols: ATVSR3, VSR3, VSR2;2, BP80-2;2 | vaculolar sorting receptor 3 | chr2:6308895-6312303 FORWARD LENGTH=628					7	9	1	4.2	6	7	1	3.2
AT2G14835.2	| Symbols: | RING/U-box superfamily protein | chr2:6367238-6370610 FORWARD LENGTH=343																					1	1	1	1	1	1	1	1	2	2	2	2	2	2	2	2
AT2G14880.1	| Symbols: | SWIB/MDM2 domain superfamily protein | chr2:6393686-6394841 REVERSE LENGTH=141													1	1	1	1	2	2	1	1.75																	2	2	1	1.75	1	1	0	0.75	1	1	1	1
AT2G15240.1	| Symbols: | UNC-50 family protein | chr2:6615980-6618862 REVERSE LENGTH=252									1	1	1	1
AT2G15320.1	| Symbols: | Leucine-rich repeat (LRR) family protein | chr2:6666527-6667675 REVERSE LENGTH=382																																	1	1	1	1
AT2G15400.2	| Symbols: RBP36B, NRPE3B | DNA-directed RNA polymerase family protein | chr2:6713022-6713918 FORWARD LENGTH=235									1	1	0	0.12													1	1	1	1
AT2G15430.1	| Symbols: RBP36A, RPB35.5A, NRPB3, NRPD3, NRPE3A | DNA-directed RNA polymerase family protein | chr2:6733661-6735482 FORWARD LENGTH=319									2	2	1	1.88
AT2G15480.2	| Symbols: UGT73B5 | UDP-glucosyl transferase 73B5 | chr2:6758817-6763398 FORWARD LENGTH=494													2	2	0	0.91					7	9	1	4.64	12	14	5	9.09	7	7	2	4.27	5	6	1	3.27	2	2	0	0.91	1	1	0	0.45	1	1	0	0.45
AT2G15490.1	| Symbols: UGT73B4 | UDP-glycosyltransferase 73B4 | chr2:6761750-6763398 FORWARD LENGTH=484													2	2	0	1.09					10	15	7	11.36	14	16	7	11.91	8	9	4	6.73	7	9	4	6.73	3	3	1	2.09	2	2	1	1.55	1	1	0	0.55
AT2G15570.1	| Symbols: ATHM3, ATM3, TRX-M3, GAT1 | Thioredoxin superfamily protein | chr2:6791556-6792902 REVERSE LENGTH=173																																													2	2	2	2
AT2G15620.1	| Symbols: NIR1, NIR, ATHNIR | nitrite reductase 1 | chr2:6810552-6812666 FORWARD LENGTH=586
AT2G15690.1	| Symbols: | Tetratricopeptide repeat (TPR)-like superfamily protein | chr2:6831855-6833594 REVERSE LENGTH=579
AT2G15790.1	| Symbols: SQN, CYP40 | peptidyl-prolyl cis-trans isomerase / cyclophilin-40 (CYP40) / rotamase | chr2:6878144-6880743 REVERSE LENGTH=361
AT2G15860.1	| Symbols: | unknown protein; FUNCTIONS IN: molecular_function unknown; INVOLVED IN: biological_process unknown; LOCATED IN: cellular_component unknown; EXPRESSED IN: 24 plant structures; EXPRESSED DURING: 13 growth stages; Has 30201 Blast hits to
AT2G15980.1	| Symbols: | Tetratricopeptide repeat (TPR)-like superfamily protein | chr2:6951349-6952845 REVERSE LENGTH=498																													1	1	1	1
AT2G16060.1	| Symbols: GLB1, AHB1, ARATH GLB1, NSHB1, ATGLB1, HB1 | hemoglobin 1 | chr2:6982782-6983522 REVERSE LENGTH=160	7	7	7	7	2	2	2	2	3	4	4	4	19	47	47	47	14	25	25	25	17	44	44	44	9	10	10	10	8	11	11	11	8	10	10	10	3	3	3	3	5	6	6	6	4	4	4	4
AT2G16370.1	| Symbols: THY-1 | thymidylate synthase 1 | chr2:7082038-7084333 REVERSE LENGTH=519
AT2G16440.1	| Symbols: MCM4 | Minichromosome maintenance (MCM2/3/5) family protein | chr2:7126536-7130665 REVERSE LENGTH=847					2	2	2	2	8	8	8	8									2	2	2	2
AT2G16450.1	| Symbols: | F-box and associated interaction domains-containing protein | chr2:7131520-7132803 REVERSE LENGTH=427
AT2G16460.1	| Symbols: | Protein of unknown function (DUF1640) | chr2:7133704-7135483 REVERSE LENGTH=230					1	2	2	2	5	6	6	6									1	1	1	1
AT2G16485.1	| Symbols: | nucleic acid binding;zinc ion binding;DNA binding | chr2:7137269-7145222 REVERSE LENGTH=1773	5	7	7	7	4	6	6	6	16	18	18	18	2	3	3	3	1	2	2	2	1	1	1	1	1	1	1	1
AT2G16530.2	| Symbols: | 3-oxo-5-alpha-steroid 4-dehydrogenase family protein | chr2:7163276-7165064 REVERSE LENGTH=342					1	1	1	1	2	2	2	2
AT2G16570.1	| Symbols: ATASE, ATASE1, ASE1 | GLN phosphoribosyl pyrophosphate amidotransferase 1 | chr2:7180424-7182124 REVERSE LENGTH=566									4	4	3	3.53									1	2	0	1.05
AT2G16600.1	| Symbols: ROC3 | rotamase CYP 3 | chr2:7200862-7201383 FORWARD LENGTH=173	23	164	136	145.13	17	115	109	111.03	13	53	49	50.59	11	17	13	14.45	9	12	10	10.58	13	25	22	23.16	3	4	4	4	3	4	4	4	2	4	4	4	1	1	1	1	1	1	1	1
AT2G16650.1	| Symbols: PRORP2 | proteinaceous RNase P 2 | chr2:7215937-7218061 REVERSE LENGTH=528
AT2G16700.1	| Symbols: ADF5, ATADF5 | actin depolymerizing factor 5 | chr2:7244717-7245467 FORWARD LENGTH=143
AT2G16780.1	| Symbols: MSI2, MSI02, NFC02, NFC2 | Transducin family protein / WD-40 repeat family protein | chr2:7281615-7283583 REVERSE LENGTH=415
AT2G16870.1	| Symbols: | Disease resistance protein (TIR-NBS-LRR class) family | chr2:7308077-7311686 REVERSE LENGTH=1109																																									1	1	1	1
AT2G16890.2	| Symbols: | UDP-Glycosyltransferase superfamily protein | chr2:7316938-7319022 FORWARD LENGTH=478
AT2G16920.1	| Symbols: UBC23, PFU2 | ubiquitin-conjugating enzyme 23 | chr2:7334559-7338827 REVERSE LENGTH=1102
AT2G16930.2	| Symbols: | Ribosomal protein L27 family protein | chr2:7341492-7342118 FORWARD LENGTH=154					1	1	1	1	1	1	1	1
AT2G16940.1	| Symbols: | Splicing factor, CC1-like | chr2:7342869-7347052 REVERSE LENGTH=561									2	2	2	2
AT2G16950.2	| Symbols: TRN1, ATTRN1 | transportin 1 | chr2:7353939-7360637 FORWARD LENGTH=891									1	1	1	1
AT2G17120.1	| Symbols: LYM2 | lysm domain GPI-anchored protein 2 precursor | chr2:7459156-7460648 FORWARD LENGTH=350	1	1	1	1									6	12	12	12	4	5	5	5	5	6	6	6	4	8	8	8	2	2	2	2	1	1	1	1	1	2	2	2
AT2G17130.2	| Symbols: IDH2, IDH-II | isocitrate dehydrogenase subunit 2 | chr2:7461062-7462466 REVERSE LENGTH=363					6	7	2	4.21	7	10	4	6.61									2	2	2	2					1	1	0	0.47	1	1	0	0.47	1	1	0	0.47	1	1	0	0.47	1	1	0	0.47
AT2G17140.1	| Symbols: | Pentatricopeptide repeat (PPR) superfamily protein | chr2:7462820-7465740 FORWARD LENGTH=874
AT2G17190.1	| Symbols: | ubiquitin family protein | chr2:7478272-7481361 REVERSE LENGTH=538													2	3	3	3	2	2	2	2	1	1	1	1	4	4	4	4	1	1	1	1	1	1	1	1	8	10	3	6.23	7	8	2	4.77	13	16	6	10.62
AT2G17200.1	| Symbols: DSK2 | ubiquitin family protein | chr2:7482133-7485090 REVERSE LENGTH=551																					3	3	3	3	3	6	6	6	4	7	7	7	3	6	6	6	9	12	5	8.77	9	11	5	8.23	15	20	10	15.38
AT2G17250.1	| Symbols: EMB2762 | CCAAT-binding factor | chr2:7499573-7502957 FORWARD LENGTH=577									2	2	2	2
AT2G17265.1	| Symbols: HSK, DMR1 | homoserine kinase | chr2:7508606-7509718 FORWARD LENGTH=370					1	1	1	1	2	3	3	3	8	10	10	10	5	6	6	6	13	25	25	25	13	16	16	16	15	23	23	23	12	18	18	18	6	8	8	8	3	4	4	4	3	4	4	4
AT2G17280.1	| Symbols: | Phosphoglycerate mutase family protein | chr2:7513274-7514844 FORWARD LENGTH=271
AT2G17290.1	| Symbols: CPK6, ATCDPK3, ATCPK6 | Calcium-dependent protein kinase family protein | chr2:7517005-7519239 FORWARD LENGTH=544
AT2G17320.1	| Symbols: | Uncharacterised conserved protein (UCP030210) | chr2:7533537-7535876 REVERSE LENGTH=361																																	3	3	3	3
AT2G17340.1	| Symbols: | Uncharacterised conserved protein (UCP030210) | chr2:7541615-7544089 REVERSE LENGTH=367									1	1	1	1
AT2G17360.1	| Symbols: | Ribosomal protein S4 (RPS4A) family protein | chr2:7546598-7548138 FORWARD LENGTH=261					17	28	2	19.33	17	36	2	24.67									14	18	2	12.67
AT2G17380.1	| Symbols: AP19 | associated protein 19 | chr2:7553122-7554887 FORWARD LENGTH=161					2	3	3	3	3	3	3	3
AT2G17390.1	| Symbols: AKR2B | ankyrin repeat-containing 2B | chr2:7555870-7557743 FORWARD LENGTH=344
AT2G17410.1	| Symbols: | ARID/BRIGHT DNA-binding domain-containing protein | chr2:7559869-7563474 FORWARD LENGTH=786
AT2G17420.1	| Symbols: NTRA, ATNTRA, NTR2 | NADPH-dependent thioredoxin reductase A | chr2:7564357-7566219 FORWARD LENGTH=378																																					2	2	2	2	3	4	4	4	10	14	13	13.57
AT2G17480.1	| Symbols: MLO8, ATMLO8 | Seven transmembrane MLO family protein | chr2:7590559-7593768 REVERSE LENGTH=593					1	1	1	1
AT2G17510.2	| Symbols: EMB2763 | ribonuclease II family protein | chr2:7609395-7616242 REVERSE LENGTH=1012
AT2G17560.1	| Symbols: HMGB4, NFD4, NFD04 | high mobility group B4 | chr2:7642486-7643468 REVERSE LENGTH=138
AT2G17630.1	| Symbols: | Pyridoxal phosphate (PLP)-dependent transferases superfamily protein | chr2:7666637-7667905 FORWARD LENGTH=422									2	2	0	0.89																									1	1	0	0.44	2	2	0	0.89	3	3	0	1.33
AT2G17640.1	| Symbols: ATSERAT3;1, SAT-106 | Trimeric LpxA-like enzymes superfamily protein | chr2:7668238-7670226 REVERSE LENGTH=323									1	1	1	1
AT2G17700.1	| Symbols: | ACT-like protein tyrosine kinase family protein | chr2:7685778-7689278 REVERSE LENGTH=546
AT2G17790.1	| Symbols: VPS35A, ZIP3 | VPS35 homolog A | chr2:7733685-7739344 FORWARD LENGTH=787					6	8	8	8	7	8	8	8									1	1	1	1
AT2G17830.1	| Symbols: | F-box and associated interaction domains-containing protein | chr2:7754261-7755445 FORWARD LENGTH=394
AT2G17840.1	| Symbols: ERD7 | Senescence/dehydration-associated protein-related | chr2:7755923-7757798 REVERSE LENGTH=452					2	2	2	2
AT2G17850.1	| Symbols: | Rhodanese/Cell cycle control phosphatase superfamily protein | chr2:7760005-7760787 REVERSE LENGTH=156	1	1	1	1	1	1	1	1	2	2	2	2	4	5	5	5	2	2	2	2	3	3	3	3	2	2	2	2	1	1	1	1	2	2	2	2
AT2G17870.1	| Symbols: ATCSP3, CSP3 | cold shock domain protein 3 | chr2:7764276-7765181 REVERSE LENGTH=301									1	1	1	1
AT2G17930.1	| Symbols: | Phosphatidylinositol 3- and 4-kinase family protein with FAT domain | chr2:7784455-7802230 REVERSE LENGTH=3858
AT2G17980.1	| Symbols: ATSLY1 | Sec1/munc18-like (SM) proteins superfamily | chr2:7824352-7826404 FORWARD LENGTH=627					2	2	2	2													3	4	4	4	3	3	3	3	3	4	4	4	17	20	20	20	5	5	5	5	8	9	9	9	6	6	6	6
AT2G18020.1	| Symbols: EMB2296 | Ribosomal protein L2 family | chr2:7837151-7838160 FORWARD LENGTH=258					5	9	3	7	10	13	4	10					1	1	1	1	4	4	1	3					1	1	1	1
AT2G18040.1	| Symbols: PIN1AT | peptidylprolyl cis/trans isomerase, NIMA-interacting 1 | chr2:7842346-7843537 FORWARD LENGTH=119	10	18	18	18	7	9	9	9	5	7	7	7	8	10	10	10	5	9	9	9	6	9	9	9	2	3	3	3	2	3	3	3	3	3	3	3	1	1	1	1	1	1	1	1
AT2G18050.1	| Symbols: HIS1-3 | histone H1-3 | chr2:7846095-7846670 FORWARD LENGTH=167
AT2G18080.1	| Symbols: EDA2 | Serine carboxypeptidase S28 family protein | chr2:7857198-7859715 FORWARD LENGTH=489																					2	5	3	3.12	3	4	2	2.12	1	2	2	2	1	1	1	1					1	1	1	1
AT2G18110.1	| Symbols: | Translation elongation factor EF1B/ribosomal protein S6 family protein | chr2:7872636-7873713 FORWARD LENGTH=231																													1	1	0	0.46	1	1	0	0.46
AT2G18140.1	| Symbols: | Peroxidase superfamily protein | chr2:7887584-7888878 REVERSE LENGTH=337													1	1	1	1	1	1	1	1	1	1	1	1													1	1	0	0.06	1	1	0	0.06
AT2G18150.1	| Symbols: | Peroxidase superfamily protein | chr2:7892298-7893586 REVERSE LENGTH=338													2	3	0	0	2	5	0	0	2	4	0	0	2	2	0	0	2	3	0	0					1	1	0	0	1	1	0	0
AT2G18220.1	| Symbols: | Noc2p family | chr2:7928254-7931851 FORWARD LENGTH=764					1	1	1	1	2	2	2	2
AT2G18230.1	| Symbols: AtPPa2, PPa2 | pyrophosphorylase 2 | chr2:7932139-7933560 REVERSE LENGTH=218																					8	10	10	10	2	3	3	3	2	3	3	3	10	14	13	13.56	17	21	11	16.56	10	16	7	12	8	10	5	7.78
AT2G18250.1	| Symbols: ATCOAD, COAD | 4-phosphopantetheine adenylyltransferase | chr2:7940025-7941499 FORWARD LENGTH=176																					4	5	5	5	9	16	16	16	7	11	11	11	6	8	8	8	2	2	2	2	2	4	4	4
AT2G18290.1	| Symbols: APC10 | anaphase promoting complex 10 | chr2:7948522-7950096 REVERSE LENGTH=192																													1	1	1	1
AT2G18330.1	| Symbols: | AAA-type ATPase family protein | chr2:7965829-7968915 FORWARD LENGTH=636									1	1	1	1
AT2G18390.1	| Symbols: TTN5, HAL, ARL2, ATARLC1 | ADP-ribosylation factor family protein | chr2:7988335-7989374 FORWARD LENGTH=185
AT2G18410.2	| Symbols: | unknown protein; FUNCTIONS IN: molecular_function unknown; INVOLVED IN: biological_process unknown; LOCATED IN: cellular_component unknown; EXPRESSED IN: 22 plant structures; EXPRESSED DURING: 13 growth stages; Has 35333 Blast hits to
AT2G18465.1	| Symbols: | Chaperone DnaJ-domain superfamily protein | chr2:8003223-8004742 REVERSE LENGTH=268
AT2G18510.1	| Symbols: emb2444 | RNA-binding (RRM/RBD/RNP motifs) family protein | chr2:8031554-8033517 REVERSE LENGTH=363									2	2	2	2													1	1	1	1	1	1	1	1	1	1	1	1
AT2G18520.1	| Symbols: | Tetratricopeptide repeat (TPR)-like superfamily protein | chr2:8034036-8035292 REVERSE LENGTH=418
AT2G18570.1	| Symbols: | UDP-Glycosyltransferase superfamily protein | chr2:8063429-8064841 FORWARD LENGTH=470
AT2G18600.1	| Symbols: | Ubiquitin-conjugating enzyme family protein | chr2:8073337-8074565 REVERSE LENGTH=185													1	1	0	0.25	2	2	1	1.25	1	1	0	0.25
AT2G18630.1	| Symbols: | Protein of unknown function (DUF677) | chr2:8081154-8082496 FORWARD LENGTH=393																																					1	1	1	1	1	1	1	1
AT2G18720.1	| Symbols: | Translation elongation factor EF1A/initiation factor IF2gamma family protein | chr2:8114920-8116759 REVERSE LENGTH=470
AT2G18740.1	| Symbols: | Small nuclear ribonucleoprotein family protein | chr2:8123334-8124710 FORWARD LENGTH=88	1	1	0	0.5	4	6	2	4	8	8	1	4.5	6	7	2	4.5	1	1	0	0.5	2	2	0	1	4	4	2	3	1	1	0	0.5	1	1	0	0.5	3	4	0	2	1	1	0	0.5	1	1	0	0.5
AT2G18750.2	| Symbols: | Calmodulin-binding protein | chr2:8125827-8128363 FORWARD LENGTH=622
AT2G18760.1	| Symbols: CHR8 | chromatin remodeling 8 | chr2:8129154-8133502 FORWARD LENGTH=1187
AT2G18790.1	| Symbols: PHYB, HY3, OOP1 | phytochrome B | chr2:8140079-8144151 FORWARD LENGTH=1172
AT2G18850.2	| Symbols: | SET domain-containing protein | chr2:8160788-8163479 FORWARD LENGTH=536
AT2G18876.2	| Symbols: | Afadin/alpha-actinin-binding protein | chr2:8170594-8172287 FORWARD LENGTH=284
AT2G18900.1	| Symbols: | Transducin/WD40 repeat-like superfamily protein | chr2:8188491-8192409 REVERSE LENGTH=804					1	1	1	1	1	1	1	1
AT2G18915.1	| Symbols: LKP2, ADO2 | LOV KELCH protein 2 | chr2:8194792-8197255 REVERSE LENGTH=601
AT2G18960.1	| Symbols: AHA1, PMA, OST2, HA1 | H(+)-ATPase 1 | chr2:8221858-8227268 FORWARD LENGTH=949					12	12	6	10.79	12	13	4	11.45									1	1	0	0.89
AT2G18990.1	| Symbols: TXND9 | thioredoxin domain-containing protein 9 homolog | chr2:8238851-8239932 REVERSE LENGTH=211																					1	1	0	0.5	2	2	1	1.5	1	1	0	0.5	4	4	1	2.5	6	7	0	3.5	11	12	3	7.5	5	6	2	4
AT2G19080.1	| Symbols: | metaxin-related | chr2:8262818-8264746 FORWARD LENGTH=315																																					1	1	1	1
AT2G19190.1	| Symbols: FRK1 | FLG22-induced receptor-like kinase 1 | chr2:8326067-8329893 REVERSE LENGTH=876
AT2G19280.1	| Symbols: | Pentatricopeptide repeat (PPR) superfamily protein | chr2:8362672-8364753 FORWARD LENGTH=693																																					1	1	1	1
AT2G19380.1	| Symbols: | RNA recognition motif (RRM)-containing protein | chr2:8383856-8386604 FORWARD LENGTH=613
AT2G19385.1	| Symbols: | zinc ion binding | chr2:8387149-8388581 FORWARD LENGTH=275									1	1	1	1																													1	1	1	1
AT2G19410.1	| Symbols: | U-box domain-containing protein kinase family protein | chr2:8404901-8409012 REVERSE LENGTH=801
AT2G19440.1	| Symbols: | O-Glycosyl hydrolases family 17 protein | chr2:8418164-8419806 REVERSE LENGTH=478																					2	2	2	2	3	4	2	2.4	3	3	2	2.2	3	4	0	0.8	2	4	0	0.8	1	1	0	0.2
AT2G19480.2	| Symbols: NFA02, NFA2, NAP1;2 | nucleosome assembly protein 1;2 | chr2:8438601-8441040 FORWARD LENGTH=373									4	4	4	4
AT2G19490.1	| Symbols: | recA DNA recombination family protein | chr2:8441732-8444006 FORWARD LENGTH=430					1	1	1	1	1	1	1	1
AT2G19500.1	| Symbols: CKX2, ATCKX2 | cytokinin oxidase 2 | chr2:8444311-8447301 REVERSE LENGTH=501																																													1	1	1	1
AT2G19520.1	| Symbols: FVE, ACG1, MSI4, NFC4, NFC04, ATMSI4 | Transducin family protein / WD-40 repeat family protein | chr2:8456006-8459235 FORWARD LENGTH=507
AT2G19540.1	| Symbols: | Transducin family protein / WD-40 repeat family protein | chr2:8461804-8464347 FORWARD LENGTH=469					1	1	1	1	2	2	2	2
AT2G19560.1	| Symbols: EER5 | proteasome family protein | chr2:8465924-8469069 REVERSE LENGTH=413
AT2G19570.1	| Symbols: CDA1, AT-CDA1, DESZ | cytidine deaminase 1 | chr2:8470598-8471503 REVERSE LENGTH=301
AT2G19590.1	| Symbols: ACO1, ATACO1 | ACC oxidase 1 | chr2:8476239-8477354 REVERSE LENGTH=310									1	1	1	1																	1	1	1	1	1	1	1	1	2	2	2	2	3	5	5	5	4	5	5	5
AT2G19640.2	| Symbols: ASHR2 | ASH1-related protein 2 | chr2:8491401-8492597 FORWARD LENGTH=398
AT2G19670.1	| Symbols: ATPRMT1A, PRMT1A | protein arginine methyltransferase 1A | chr2:8499278-8501114 REVERSE LENGTH=366
AT2G19680.2	| Symbols: | Mitochondrial ATP synthase subunit G protein | chr2:8501865-8502622 FORWARD LENGTH=122					2	2	1	1.25	2	2	1	1.25
AT2G19730.1	| Symbols: | Ribosomal L28e protein family | chr2:8511752-8512995 FORWARD LENGTH=143	1	1	1	1	7	10	9	9.58	8	18	16	17.17	2	2	1	1.58	1	1	0	0.58	4	6	5	5.58					1	1	0	0.58	1	1	0	0.58					1	1	0	0.58	1	1	0	0.58
AT2G19750.1	| Symbols: | Ribosomal protein S30 family protein | chr2:8515037-8515806 FORWARD LENGTH=62					1	1	1	1	1	1	1	1
AT2G19760.1	| Symbols: PFN1, PRF1 | profilin 1 | chr2:8517074-8518067 REVERSE LENGTH=131																													1	1	1	1
AT2G19790.1	| Symbols: | SNARE-like superfamily protein | chr2:8527302-8528395 FORWARD LENGTH=143
AT2G19870.1	| Symbols: | tRNA/rRNA methyltransferase (SpoU) family protein | chr2:8576034-8577803 FORWARD LENGTH=589									2	3	3	3
AT2G19900.1	| Symbols: ATNADP-ME1, NADP-ME1 | NADP-malic enzyme 1 | chr2:8592106-8595403 REVERSE LENGTH=581									1	1	0	0.03
AT2G19940.1	| Symbols: | oxidoreductases, acting on the aldehyde or oxo group of donors, NAD or NADP as acceptor;copper ion binding | chr2:8613168-8615649 FORWARD LENGTH=401
AT2G20060.1	| Symbols: | Ribosomal protein L4/L1 family | chr2:8659384-8661227 FORWARD LENGTH=300					1	1	1	1	4	5	5	5
AT2G20120.1	| Symbols: COV1 | Protein of unknown function (DUF502) | chr2:8687568-8689321 REVERSE LENGTH=268					1	1	1	1	1	1	1	1
AT2G20190.1	| Symbols: ATCLASP, CLASP | CLIP-associated protein | chr2:8711862-8718813 REVERSE LENGTH=1439					1	1	1	1	3	3	3	3	7	7	7	7	4	4	4	4	2	3	3	3	5	6	6	6	6	7	7	7	3	3	3	3	2	2	2	2	3	3	3	3	2	2	2	2
AT2G20260.1	| Symbols: PSAE-2 | photosystem I subunit E-2 | chr2:8736780-8737644 FORWARD LENGTH=145	3	5	3	3.8	3	4	3	3.4	1	1	0	0.4	2	5	5	5	2	3	2	2.4	3	6	5	5.4	2	5	4	4.4	3	5	3	3.8	1	2	2	2	1	3	3	3	1	3	3	3
AT2G20270.1	| Symbols: | Thioredoxin superfamily protein | chr2:8738001-8739617 REVERSE LENGTH=179																													1	1	1	1					7	9	9	9	4	4	4	4	5	5	5	5
AT2G20280.1	| Symbols: | Zinc finger C-x8-C-x5-C-x3-H type family protein | chr2:8740054-8742349 REVERSE LENGTH=371
AT2G20330.1	| Symbols: | Transducin/WD40 repeat-like superfamily protein | chr2:8772888-8775518 REVERSE LENGTH=648
AT2G20340.1	| Symbols: | Pyridoxal phosphate (PLP)-dependent transferases superfamily protein | chr2:8779804-8782490 FORWARD LENGTH=490
AT2G20360.1	| Symbols: | NAD(P)-binding Rossmann-fold superfamily protein | chr2:8786070-8789098 FORWARD LENGTH=402					5	6	6	6	7	10	10	10
AT2G20420.1	| Symbols: | ATP citrate lyase (ACL) family protein | chr2:8805574-8807858 FORWARD LENGTH=421					1	1	1	1																									1	1	1	1	28	38	38	38	25	38	38	38	33	78	78	78
[truncated: 4,605 more rows]
[truncated: 72 more columns]

## Sheet: Filtered only
		1-F0				2-F0				3-F0				1-F50				2-F50				3-F50				1-F100				2-F100				3-F100				1-F150				2-F150				3-F150
Protein		Pep	SC	SSC	WSC	Pep	SC	SSC	WSC	Pep	SC	SSC	WSC	Pep	SC	SSC	WSC	Pep	SC	SSC	WSC	Pep	SC	SSC	WSC	Pep	SC	SSC	WSC	Pep	SC	SSC	WSC	Pep	SC	SSC	WSC	Pep	SC	SSC	WSC	Pep	SC	SSC	WSC	Pep	SC	SSC	WSC
AT1G01050.1	| Symbols: AtPPa1, PPa1 | pyrophosphorylase 1 | chr1:31382-32670 REVERSE LENGTH=212																																					14	25	15	17.96	9	19	10	12.67	11	19	14	15.48
AT1G01090.1	| Symbols: PDH-E1 ALPHA | pyruvate dehydrogenase E1 alpha | chr1:47705-49166 REVERSE LENGTH=428	6	6	6	6	26	35	35	35	31	46	46	46
AT1G01100.4	| Symbols: | 60S acidic ribosomal protein family | chr1:50284-50954 REVERSE LENGTH=112					9	13	7	9.63	8	15	10	12.13
AT1G01220.1	| Symbols: FKGP, AtFKGP | L-fucokinase/GDP-L-fucose pyrophosphorylase | chr1:91750-95552 FORWARD LENGTH=1055
AT1G01300.1	| Symbols: | Eukaryotic aspartyl protease family protein | chr1:117065-118522 FORWARD LENGTH=485					5	5	5	5	8	9	9	9
AT1G01320.1	| Symbols: | Tetratricopeptide repeat (TPR)-like superfamily protein | chr1:121582-130099 REVERSE LENGTH=1797
AT1G01630.1	| Symbols: | Sec14p-like phosphatidylinositol transfer family protein | chr1:229206-230675 FORWARD LENGTH=255													3	3	3	3	5	5	5	5
AT1G01800.1	| Symbols: | NAD(P)-binding Rossmann-fold superfamily protein | chr1:293396-294888 FORWARD LENGTH=295																																					19	24	23	23.4	21	27	26	26.4	16	25	24	24.4
AT1G01910.1	| Symbols: | P-loop containing nucleoside triphosphate hydrolases superfamily protein | chr1:313595-315831 REVERSE LENGTH=353
AT1G01920.1	| Symbols: | SET domain-containing protein | chr1:316204-319507 FORWARD LENGTH=572
AT1G01940.1	| Symbols: | Cyclophilin-like peptidyl-prolyl cis-trans isomerase family protein | chr1:323082-324719 FORWARD LENGTH=160	14	22	22	22	5	6	6	6	3	3	3	3	4	4	4	4	5	5	5	5	8	9	9	9	3	3	3	3	3	3	3	3	6	6	6	6	4	4	4	4	3	3	3	3
AT1G01960.1	| Symbols: EDA10 | SEC7-like guanine nucleotide exchange family protein | chr1:330830-337582 REVERSE LENGTH=1750
AT1G02080.2	| Symbols: | transcription regulators | chr1:373694-386682 FORWARD LENGTH=2377					3	4	4	4	10	11	11	11	3	3	3	3	2	2	2	2	2	2	2	2
AT1G02090.2	| Symbols: FUS5, CSN7, COP15, ATCSN7 | Proteasome component (PCI) domain protein | chr1:387647-389568 REVERSE LENGTH=225
AT1G02100.1	| Symbols: | Leucine carboxyl methyltransferase | chr1:389876-392448 FORWARD LENGTH=332																																					2	2	2	2	3	3	3	3	2	2	2	2
AT1G02130.1	| Symbols: ATRAB1B, ARA5, ARA-5, ATRABD2A, RABD2A, RA-5 | RAS 5 | chr1:400350-401788 REVERSE LENGTH=203					4	5	1	2.38	5	5	2	3.11
AT1G02140.1	| Symbols: MEE63, MAGO, HAP1 | mago nashi family protein | chr1:403467-404401 REVERSE LENGTH=150					2	2	2	2	2	2	2	2
AT1G02150.1	| Symbols: | Tetratricopeptide repeat (TPR)-like superfamily protein | chr1:408779-410433 FORWARD LENGTH=524
AT1G02305.1	| Symbols: | Cysteine proteinases superfamily protein | chr1:455816-457974 FORWARD LENGTH=362																									10	21	21	21	6	9	9	9	3	3	3	3	9	11	11	11	3	5	5	5
AT1G02360.1	| Symbols: | Chitinase family protein | chr1:472138-473116 REVERSE LENGTH=272													4	6	6	6	5	6	6	6	5	5	5	5
AT1G02500.1	| Symbols: SAM1, SAM-1, MAT1, AtSAM1 | S-adenosylmethionine synthetase 1 | chr1:519037-520218 FORWARD LENGTH=393					5	5	2	3.01	9	10	2	4.49
AT1G02560.1	| Symbols: CLPP5, NCLPP5, NCLPP1 | nuclear encoded CLP protease 5 | chr1:538000-539805 FORWARD LENGTH=298
AT1G02690.2	| Symbols: IMPA-6 | importin alpha isoform 6 | chr1:584397-587036 FORWARD LENGTH=539
AT1G02770.1	| Symbols: | Protein of unknown function (DUF626) | chr1:605071-606624 REVERSE LENGTH=316
AT1G02780.1	| Symbols: emb2386 | Ribosomal protein L19e family protein | chr1:608120-609391 REVERSE LENGTH=214					5	9	7	8	9	15	12	13.5
AT1G02840.3	| Symbols: SR1, ATSRP34, SRP34, SR34, At-SR34 | RNA-binding (RRM/RBD/RNP motifs) family protein | chr1:626918-629583 FORWARD LENGTH=303					2	2	0	1.37	4	6	6	6
AT1G02880.3	| Symbols: TPK1 | thiamin pyrophosphokinase1 | chr1:643063-644485 REVERSE LENGTH=267
AT1G02920.1	| Symbols: ATGSTF7, GST11, ATGSTF8, GSTF7, ATGST11 | glutathione S-transferase 7 | chr1:658886-659705 REVERSE LENGTH=209													2	2	0	0.8					6	6	5	5.54	5	6	3	4.62	4	5	3	4.08	9	10	6	8.15	4	5	0	2.69	3	3	0	1.62	4	6	0	3.23
AT1G02930.1	| Symbols: ATGSTF6, GST1, ERD11, ATGSTF3, GSTF6, ATGST1 | glutathione S-transferase 6 | chr1:661363-662191 REVERSE LENGTH=208																									3	3	0	1.38	2	2	0	0.92	4	4	0	1.85	5	6	1	3.31	5	5	2	3.38	9	12	6	8.77
AT1G03030.1	| Symbols: | P-loop containing nucleoside triphosphate hydrolases superfamily protein | chr1:701621-703568 FORWARD LENGTH=301
AT1G03090.2	| Symbols: MCCA | methylcrotonyl-CoA carboxylase alpha chain, mitochondrial / 3-methylcrotonyl-CoA carboxylase 1 (MCCA) | chr1:739715-743819 FORWARD LENGTH=734
AT1G03110.1	| Symbols: TRM82, AtTRM82 | Transducin/WD40 repeat-like superfamily protein | chr1:749359-751796 FORWARD LENGTH=427
AT1G03150.1	| Symbols: | Acyl-CoA N-acyltransferases (NAT) superfamily protein | chr1:756461-758441 FORWARD LENGTH=174
AT1G03220.1	| Symbols: | Eukaryotic aspartyl protease family protein | chr1:787143-788444 FORWARD LENGTH=433	8	10	8	9.26	5	6	4	5.26	9	11	9	10.26	24	56	47	52.66	20	41	32	37.66	19	51	42	47.66	15	20	16	18.51	9	12	7	10.14	11	18	15	16.89	6	7	3	5.51	4	4	2	3.26	3	5	2	3.89
AT1G03230.1	| Symbols: | Eukaryotic aspartyl protease family protein | chr1:790110-791414 FORWARD LENGTH=434	2	2	0	0.74	4	6	4	4.74	7	8	6	6.74	13	19	10	13.34	13	19	10	13.34	5	10	1	4.34	9	10	6	7.49	8	9	4	5.86	3	4	1	2.11	12	13	9	10.49	9	10	8	8.74	4	5	2	3.11
AT1G03310.2	| Symbols: ATISA2, ISA2, DBE1, BE2 | debranching enzyme 1 | chr1:813975-816623 FORWARD LENGTH=882
AT1G03330.1	| Symbols: | Small nuclear ribonucleoprotein family protein | chr1:818161-819297 REVERSE LENGTH=93
AT1G03350.1	| Symbols: | BSD domain-containing protein | chr1:822834-824246 REVERSE LENGTH=470
AT1G03360.1	| Symbols: ATRRP4, RRP4 | ribosomal RNA processing 4 | chr1:824653-826179 FORWARD LENGTH=322
AT1G03475.1	| Symbols: LIN2, HEMF1, ATCPO-I | Coproporphyrinogen III oxidase | chr1:869302-871175 REVERSE LENGTH=386
AT1G03600.1	| Symbols: PSB27 | photosystem II family protein | chr1:898916-899440 FORWARD LENGTH=174													5	5	5	5	3	3	3	3	2	2	2	2
AT1G03680.1	| Symbols: ATHM1, TRX-M1, ATM1, THM1 | thioredoxin M-type 1 | chr1:916990-917865 REVERSE LENGTH=179																									5	6	6	6	3	4	4	4	5	9	9	9	7	12	12	12	5	6	6	6	5	5	5	5
AT1G03760.1	| Symbols: | Prefoldin chaperone subunit family protein | chr1:941211-943320 REVERSE LENGTH=391
AT1G03860.1	| Symbols: ATPHB2, PHB2 | prohibitin 2 | chr1:979611-981157 REVERSE LENGTH=286					8	12	8	10.35	9	11	7	9.35
AT1G03870.1	| Symbols: FLA9 | FASCICLIN-like arabinoogalactan 9 | chr1:982625-983368 REVERSE LENGTH=247													8	8	8	8	3	4	4	4	6	8	8	8
AT1G03900.1	| Symbols: ATNAP4, NAP4 | non-intrinsic ABC protein 4 | chr1:991252-992852 FORWARD LENGTH=272
AT1G03905.1	| Symbols: | P-loop containing nucleoside triphosphate hydrolases superfamily protein | chr1:993478-995594 FORWARD LENGTH=290
AT1G03910.2	| Symbols: | EXPRESSED IN: 24 plant structures; EXPRESSED DURING: 13 growth stages; CONTAINS InterPro DOMAIN/s: Cactin protein, cactus-binding domain, C-terminal (InterPro:IPR019134), Cactin, central region (InterPro:IPR018816); BEST Arabidopsis th
AT1G03980.1	| Symbols: ATPCS2, PCS2 | phytochelatin synthase 2 | chr1:1019311-1021871 REVERSE LENGTH=452
AT1G04080.3	| Symbols: PRP39 | Tetratricopeptide repeat (TPR)-like superfamily protein | chr1:1051803-1056550 FORWARD LENGTH=823
AT1G04130.1	| Symbols: TPR2, AtTPR2 | Tetratricopeptide repeat (TPR)-like superfamily protein | chr1:1073465-1075374 FORWARD LENGTH=360																																					9	11	11	11	8	10	10	10	8	9	9	9
AT1G04170.1	| Symbols: EIF2 GAMMA | eukaryotic translation initiation factor 2 gamma subunit | chr1:1097423-1099702 FORWARD LENGTH=465
AT1G04190.1	| Symbols: TPR3 | Tetratricopeptide repeat (TPR)-like superfamily protein | chr1:1106617-1108557 REVERSE LENGTH=328													10	12	12	12	3	3	3	3					7	7	7	7	6	7	7	7	4	4	4	4	11	13	13	13	11	14	14	14	8	8	8	8
AT1G04260.1	| Symbols: MPI7, MPIP7, PRA1.D | CAMV movement protein interacting protein 7 | chr1:1140749-1141297 REVERSE LENGTH=182					3	3	3	3	4	4	4	4
AT1G04270.1	| Symbols: RPS15 | cytosolic ribosomal protein S15 | chr1:1141852-1142960 REVERSE LENGTH=152					7	32	32	32	8	35	35	35
AT1G04350.1	| Symbols: | 2-oxoglutarate (2OG) and Fe(II)-dependent oxygenase superfamily protein | chr1:1165296-1166538 FORWARD LENGTH=360																																					3	3	3	3	2	2	2	2	4	5	5	5
AT1G04400.1	| Symbols: CRY2, FHA, AT-PHH1, PHH1, ATCRY2 | cryptochrome 2 | chr1:1185719-1187901 REVERSE LENGTH=612
AT1G04410.1	| Symbols: | Lactate/malate dehydrogenase family protein | chr1:1189418-1191267 REVERSE LENGTH=332	5	5	4	4.56	4	4	2	3.11	11	14	8	11.33	10	12	7	9.78	9	10	5	7.78	10	14	4	9.56	26	54	29	42.89	19	40	20	31.11	41	327	235	286.11	35	198	153	178	34	225	179	204.56	29	124	92	109.78
AT1G04420.1	| Symbols: | NAD(P)-linked oxidoreductase superfamily protein | chr1:1191634-1193699 FORWARD LENGTH=412
AT1G04510.1	| Symbols: MAC3A | MOS4-associated complex 3A | chr1:1226749-1230592 FORWARD LENGTH=523					2	2	2	2	5	5	5	5
AT1G04690.1	| Symbols: KAB1, KV-BETA1 | potassium channel beta subunit 1 | chr1:1313662-1315420 FORWARD LENGTH=328	2	2	2	2	3	4	4	4	11	15	15	15	22	31	31	31	12	20	20	20	14	22	22	22	12	19	19	19	9	11	11	11	16	23	23	23	13	16	16	16	10	15	15	15	14	20	20	20
AT1G04750.1	| Symbols: VAMP7B, VAMP721, ATVAMP721, AT VAMP7B | vesicle-associated membrane protein 721 | chr1:1331857-1333426 REVERSE LENGTH=219	3	3	0	1.5	5	7	0	3.5	7	10	0	5	5	5	0	2.5	3	4	0	2	9	11	1	6
AT1G04810.1	| Symbols: | 26S proteasome regulatory complex, non-ATPase subcomplex, Rpn2/Psmd1 subunit | chr1:1350304-1355261 FORWARD LENGTH=1001					4	4	0	1.58	14	16	5	9.35
AT1G04850.1	| Symbols: | ubiquitin-associated (UBA)/TS-N domain-containing protein | chr1:1365311-1368706 REVERSE LENGTH=413	2	2	2	2	3	3	3	3
AT1G04870.2	| Symbols: PRMT10, ATPRMT10 | protein arginine methyltransferase 10 | chr1:1373485-1375598 REVERSE LENGTH=383
AT1G05010.1	| Symbols: EFE, ACO4, EAT1 | ethylene-forming enzyme | chr1:1431419-1432695 REVERSE LENGTH=323
AT1G05180.1	| Symbols: AXR1 | NAD(P)-binding Rossmann-fold superfamily protein | chr1:1498357-1501775 REVERSE LENGTH=540
AT1G05190.1	| Symbols: emb2394 | Ribosomal protein L6 family | chr1:1502515-1503738 REVERSE LENGTH=223
AT1G05350.1	| Symbols: | NAD(P)-binding Rossmann-fold superfamily protein | chr1:1560891-1564005 REVERSE LENGTH=431
AT1G05520.1	| Symbols: | Sec23/Sec24 protein transport family protein | chr1:1631126-1635703 REVERSE LENGTH=783
AT1G05560.1	| Symbols: UGT1, UGT75B1 | UDP-glucosyltransferase 75B1 | chr1:1645674-1647083 REVERSE LENGTH=469
AT1G05620.1	| Symbols: URH2 | uridine-ribohydrolase 2 | chr1:1679286-1681527 FORWARD LENGTH=322
AT1G05890.2	| Symbols: ARI5 | RING/U-box superfamily protein | chr1:1779631-1784166 FORWARD LENGTH=594
AT1G06000.1	| Symbols: | UDP-Glycosyltransferase superfamily protein | chr1:1820495-1821802 REVERSE LENGTH=435
AT1G06060.1	| Symbols: | LisH and RanBPM domains containing protein | chr1:1833071-1834516 FORWARD LENGTH=213
AT1G06130.2	| Symbols: GLX2-4 | glyoxalase 2-4 | chr1:1858034-1860640 REVERSE LENGTH=330																																					6	7	7	7	5	5	5	5	6	8	8	8
AT1G06210.1	| Symbols: | ENTH/VHS/GAT family protein | chr1:1897567-1898986 FORWARD LENGTH=383
AT1G06220.2	| Symbols: MEE5 | Ribosomal protein S5/Elongation factor G/III/V family protein | chr1:1900524-1904583 FORWARD LENGTH=987					17	17	17	17	27	31	31	31
AT1G06290.1	| Symbols: ACX3, ATACX3 | acyl-CoA oxidase 3 | chr1:1922423-1926002 FORWARD LENGTH=675													9	11	11	11	10	11	11	11	15	18	18	18	26	31	31	31	26	33	33	33	31	43	43	43	14	16	16	16	15	19	19	19	9	11	11	11
AT1G06400.1	| Symbols: ARA2, ATRABA1A, ATRAB11E, ARA-2 | Ras-related small GTP-binding family protein | chr1:1951089-1952686 REVERSE LENGTH=216					4	4	3	3.27	4	4	3	3.17					2	2	1	1.17	2	2	2	2					3	4	3	3.17	3	3	2	2.17
AT1G06410.1	| Symbols: ATTPS7, TPS7, ATTPSA | trehalose-phosphatase/synthase 7 | chr1:1955413-1958153 FORWARD LENGTH=851
AT1G06550.1	| Symbols: | ATP-dependent caseinolytic (Clp) protease/crotonase family protein | chr1:2003834-2006564 REVERSE LENGTH=387
AT1G06560.1	| Symbols: | NOL1/NOP2/sun family protein | chr1:2007660-2011824 FORWARD LENGTH=599
AT1G06570.1	| Symbols: PDS1, HPD | phytoene desaturation 1 | chr1:2012015-2013543 REVERSE LENGTH=473
AT1G06650.2	| Symbols: | 2-oxoglutarate (2OG) and Fe(II)-dependent oxygenase superfamily protein | chr1:2035909-2037186 FORWARD LENGTH=369																									2	2	2	2					9	12	12	12	12	16	16	16	6	8	8	8	5	5	5	5
AT1G06670.1	| Symbols: NIH | nuclear DEIH-boxhelicase | chr1:2040567-2047333 FORWARD LENGTH=1576
AT1G06680.2	| Symbols: PSBP-1, OEE2, PSII-P | photosystem II subunit P-1 | chr1:2048076-2049186 FORWARD LENGTH=219																									4	6	3	5.75	5	7	6	6.92	10	37	34	36.75	12	31	25	30.5	10	24	21	23.75	9	21	15	20.5
AT1G06690.1	| Symbols: | NAD(P)-linked oxidoreductase superfamily protein | chr1:2049742-2052039 REVERSE LENGTH=377																																									4	4	4	4	4	4	4	4
AT1G06700.2	| Symbols: | Protein kinase superfamily protein | chr1:2052750-2054552 REVERSE LENGTH=361																																					2	2	2	2	2	3	3	3
AT1G06720.1	| Symbols: | P-loop containing nucleoside triphosphate hydrolases superfamily protein | chr1:2060615-2067281 REVERSE LENGTH=1147
AT1G06840.1	| Symbols: | Leucine-rich repeat protein kinase family protein | chr1:2097854-2103208 REVERSE LENGTH=953	2	2	2	2	3	3	3	3
AT1G06900.1	| Symbols: | Insulinase (Peptidase family M16) family protein | chr1:2115155-2120635 REVERSE LENGTH=1024
AT1G06950.1	| Symbols: ATTIC110, TIC110 | translocon at the inner envelope membrane of chloroplasts 110 | chr1:2130303-2135563 REVERSE LENGTH=1016					8	8	8	8	8	8	8	8
AT1G07040.1	| Symbols: | unknown protein; INVOLVED IN: biological_process unknown; LOCATED IN: chloroplast; EXPRESSED IN: 24 plant structures; EXPRESSED DURING: 14 growth stages; BEST Arabidopsis thaliana protein match is: unknown protein (TAIR:AT1G27030.1); H													13	21	21	21	8	11	11	11	11	15	15	15	10	13	13	13	7	9	9	9	6	7	7	7
AT1G07070.1	| Symbols: | Ribosomal protein L35Ae family protein | chr1:2168652-2169703 FORWARD LENGTH=112					4	5	1	1.8	4	9	1	2.6
AT1G07110.1	| Symbols: F2KP, ATF2KP, FKFBP | fructose-2,6-bisphosphatase | chr1:2178363-2183980 REVERSE LENGTH=744
AT1G07140.1	| Symbols: SIRANBP | Pleckstrin homology (PH) domain superfamily protein | chr1:2192360-2193688 REVERSE LENGTH=228
AT1G07240.1	| Symbols: UGT71C5 | UDP-glucosyl transferase 71C5 | chr1:2223889-2225331 FORWARD LENGTH=480
AT1G07320.3	| Symbols: RPL4 | ribosomal protein L4 | chr1:2249190-2250026 FORWARD LENGTH=278					3	3	3	3	5	5	5	5
AT1G07370.1	| Symbols: PCNA1, ATPCNA1 | proliferating cellular nuclear antigen 1 | chr1:2263204-2264382 FORWARD LENGTH=263
AT1G07670.1	| Symbols: ATECA4, ECA4 | endomembrane-type CA-ATPase 4 | chr1:2370305-2374196 REVERSE LENGTH=1061					8	9	9	9	11	12	12	12
AT1G07750.1	| Symbols: | RmlC-like cupins superfamily protein | chr1:2404300-2405863 REVERSE LENGTH=356																																					15	21	21	21	16	27	27	27	19	44	44	44
AT1G07770.1	| Symbols: RPS15A | ribosomal protein S15A | chr1:2408413-2409065 REVERSE LENGTH=130					5	8	4	6.29	7	17	10	14					2	2	1	1.57	3	3	1	2.14
AT1G07840.3	| Symbols: | Sas10/Utp3/C1D family | chr1:2424603-2426131 FORWARD LENGTH=279
AT1G07890.1	| Symbols: APX1, MEE6, CS1, ATAPX1, ATAPX01 | ascorbate peroxidase 1 | chr1:2438005-2439435 FORWARD LENGTH=250																																					9	14	14	14	10	15	15	15	15	25	24	24.54
AT1G07940.2	| Symbols: | GTP binding Elongation factor Tu family protein | chr1:2463350-2464792 REVERSE LENGTH=449	14	16	16	16	16	24	24	24	27	62	62	62	22	47	47	47	19	35	35	35	23	58	58	58	21	60	60	60	24	53	53	53	28	85	85	85	22	48	48	48	23	68	68	68	23	63	63	63
AT1G07960.3	| Symbols: ATPDIL5-1, PDIL5-1 | PDI-like 5-1 | chr1:2467681-2468831 FORWARD LENGTH=146
AT1G07990.1	| Symbols: | SIT4 phosphatase-associated family protein | chr1:2477413-2482898 FORWARD LENGTH=802
AT1G08110.3	| Symbols: | lactoylglutathione lyase family protein / glyoxalase I family protein | chr1:2535702-2537630 FORWARD LENGTH=185
AT1G08130.1	| Symbols: ATLIG1, LIG1 | DNA ligase 1 | chr1:2542913-2547815 REVERSE LENGTH=790
AT1G08200.1	| Symbols: AXS2 | UDP-D-apiose/UDP-D-xylose synthase 2 | chr1:2574259-2576609 REVERSE LENGTH=389
AT1G08360.1	| Symbols: | Ribosomal protein L1p/L10e family | chr1:2636231-2637694 FORWARD LENGTH=216					14	19	3	8.02	18	39	7	17.25
AT1G08370.1	| Symbols: DCP1, ATDCP1 | decapping 1 | chr1:2638355-2640367 FORWARD LENGTH=367
AT1G08410.1	| Symbols: | P-loop containing nucleoside triphosphate hydrolases superfamily protein | chr1:2646307-2649106 FORWARD LENGTH=589
AT1G08420.2	| Symbols: BSL2 | BRI1 suppressor 1 (BSU1)-like 2 | chr1:2649959-2656564 FORWARD LENGTH=1013
AT1G08450.1	| Symbols: CRT3, PSL1, EBS2, AtCRT3 | calreticulin 3 | chr1:2668008-2671800 REVERSE LENGTH=424					3	4	4	4	7	9	9	9
AT1G08490.1	| Symbols: ATSUFS, SUFS, ATCPNIFS, ATNFS2, CPNIFS | chloroplastic NIFS-like cysteine desulfurase | chr1:2685980-2688547 REVERSE LENGTH=463
AT1G08550.1	| Symbols: NPQ1, AVDE1 | non-photochemical quenching 1 | chr1:2707462-2709387 FORWARD LENGTH=462
AT1G08780.1	| Symbols: AIP3, PFD4 | ABI3-interacting protein 3 | chr1:2809925-2811126 REVERSE LENGTH=129
AT1G08940.1	| Symbols: | Phosphoglycerate mutase family protein | chr1:2877694-2879104 FORWARD LENGTH=281
AT1G08980.1	| Symbols: ATAMI1, AMI1, ATTOC64-I, TOC64-I | amidase 1 | chr1:2884455-2886430 FORWARD LENGTH=425																																					14	21	21	21	17	24	24	24	14	23	23	23
AT1G09010.1	| Symbols: | glycoside hydrolase family 2 protein | chr1:2895259-2899287 REVERSE LENGTH=944
AT1G09020.1	| Symbols: SNF4, ATSNF4 | homolog of yeast sucrose nonfermenting 4 | chr1:2900149-2904212 REVERSE LENGTH=487
AT1G09100.1	| Symbols: RPT5B | 26S proteasome AAA-ATPase subunit RPT5B | chr1:2936675-2939258 REVERSE LENGTH=423					5	6	0	1.14	13	15	2	4.35
AT1G09130.2	| Symbols: | ATP-dependent caseinolytic (Clp) protease/crotonase family protein | chr1:2940063-2942217 REVERSE LENGTH=330
AT1G09150.1	| Symbols: | pseudouridine synthase and archaeosine transglycosylase (PUA) domain-containing protein | chr1:2946599-2948908 FORWARD LENGTH=181																																					2	2	2	2	3	3	3	3	4	5	5	5
AT1G09210.1	| Symbols: CRT1b, AtCRT1b | calreticulin 1b | chr1:2973217-2976655 REVERSE LENGTH=424					4	4	0	1.92	6	8	4	5.92
AT1G09270.2	| Symbols: IMPA-4 | importin alpha isoform 4 | chr1:2994506-2997833 FORWARD LENGTH=538
AT1G09300.1	| Symbols: | Metallopeptidase M24 family protein | chr1:3003981-3008131 FORWARD LENGTH=493
AT1G09340.1	| Symbols: CRB, CSP41B, HIP1.3 | chloroplast RNA binding | chr1:3015473-3018035 FORWARD LENGTH=378					4	5	5	5	3	4	4	4
AT1G09430.1	| Symbols: ACLA-3 | ATP-citrate lyase A-3 | chr1:3042135-3044978 FORWARD LENGTH=424
AT1G09480.1	| Symbols: | NAD(P)-binding Rossmann-fold superfamily protein | chr1:3057975-3060661 FORWARD LENGTH=369
AT1G09490.1	| Symbols: | NAD(P)-binding Rossmann-fold superfamily protein | chr1:3064172-3065815 FORWARD LENGTH=322
AT1G09500.1	| Symbols: | NAD(P)-binding Rossmann-fold superfamily protein | chr1:3066811-3068484 FORWARD LENGTH=325
AT1G09590.1	| Symbols: | Translation protein SH3-like family protein | chr1:3106549-3107606 FORWARD LENGTH=164					5	5	5	5	8	19	19	19
AT1G09620.1	| Symbols: | ATP binding;leucine-tRNA ligases;aminoacyl-tRNA ligases;nucleotide binding;ATP binding;aminoacyl-tRNA ligases | chr1:3113077-3116455 REVERSE LENGTH=1091
AT1G09630.1	| Symbols: ATRAB11C, ATRABA2A, ATRAB-A2A, RAB-A2A, RAB11c | RAB GTPase 11C | chr1:3118350-3119571 REVERSE LENGTH=217					5	6	4	4.63	4	4	2	2.54	2	2	1	1.17	2	2	1	1.17	2	2	2	2	2	2	1	1.17	2	2	1	1.17
AT1G09640.1	| Symbols: | Translation elongation factor EF1B, gamma chain | chr1:3120162-3122152 FORWARD LENGTH=414
AT1G09750.1	| Symbols: | Eukaryotic aspartyl protease family protein | chr1:3157541-3158960 FORWARD LENGTH=449													2	2	2	2	2	2	2	2	2	2	2	2
AT1G09760.1	| Symbols: U2A' | U2 small nuclear ribonucleoprotein A | chr1:3159476-3161603 REVERSE LENGTH=249					5	5	5	5	6	7	7	7																									4	4	4	4	7	7	7	7
AT1G09770.1	| Symbols: ATCDC5, CDC5, ATMYBCDC5 | cell division cycle 5 | chr1:3162002-3165122 FORWARD LENGTH=844					5	5	5	5	10	11	11	11
AT1G09780.1	| Symbols: | Phosphoglycerate mutase, 2,3-bisphosphoglycerate-independent | chr1:3165550-3167812 REVERSE LENGTH=557																																					3	3	0	1.48	7	8	0	3.94	12	22	0	10.83
AT1G09795.1	| Symbols: ATATP-PRT2, HISN1B, ATP-PRT2 | ATP phosphoribosyl transferase 2 | chr1:3173588-3176690 FORWARD LENGTH=413																																					5	5	5	5	4	4	4	4	4	5	5	5
AT1G09830.1	| Symbols: | Glycinamide ribonucleotide (GAR) synthetase | chr1:3192783-3194936 REVERSE LENGTH=532
AT1G10230.1	| Symbols: ASK18, SK18 | SKP1-like 18 | chr1:3355600-3356151 FORWARD LENGTH=183
AT1G10270.1	| Symbols: GRP23 | glutamine-rich protein 23 | chr1:3363535-3366276 FORWARD LENGTH=913					2	2	2	2	2	2	2	2
AT1G10290.1	| Symbols: ADL6, DRP2A | dynamin-like protein 6 | chr1:3370774-3377120 FORWARD LENGTH=914					6	7	1	4.43	7	7	3	5.29
AT1G10370.1	| Symbols: GST30, ATGSTU17, GST30B, ERD9 | Glutathione S-transferase family protein | chr1:3397274-3398273 REVERSE LENGTH=227																									10	13	13	13	8	14	14	14	9	18	18	18	8	10	10	10	8	11	11	11	4	5	5	5
AT1G10390.2	| Symbols: | Nucleoporin autopeptidase | chr1:3407265-3412045 REVERSE LENGTH=1041													6	6	6	6	2	2	2	2	2	3	3	3
AT1G10430.1	| Symbols: PP2A-2 | protein phosphatase 2A-2 | chr1:3428705-3430437 REVERSE LENGTH=306
AT1G10500.1	| Symbols: ATCPISCA, CPISCA | chloroplast-localized ISCA-like protein | chr1:3460160-3461340 REVERSE LENGTH=180													4	4	4	4	2	3	3	3	4	5	5	5	2	2	2	2					2	2	2	2
AT1G10580.1	| Symbols: | Transducin/WD40 repeat-like superfamily protein | chr1:3491560-3493665 REVERSE LENGTH=573					2	2	2	2	2	2	2	2
AT1G10590.2	| Symbols: | Nucleic acid-binding, OB-fold-like protein | chr1:3502324-3502991 REVERSE LENGTH=139																																					2	2	2	2	3	3	3	3	3	3	3	3
AT1G10670.2	| Symbols: ACLA-1 | ATP-citrate lyase A-1 | chr1:3535787-3538098 FORWARD LENGTH=423
AT1G10760.1	| Symbols: SEX1, SOP1, SOP, GWD1, GWD | Pyruvate phosphate dikinase, PEP/pyruvate binding domain | chr1:3581210-3590043 REVERSE LENGTH=1399													5	5	5	5	3	4	4	4	3	3	3	3
AT1G10840.1	| Symbols: TIF3H1 | translation initiation factor 3 subunit H1 | chr1:3607885-3610299 REVERSE LENGTH=337					12	13	13	13	12	12	12	12
AT1G10940.2	| Symbols: | Protein kinase superfamily protein | chr1:3656050-3658170 REVERSE LENGTH=371													2	2	0	0.53	3	3	0	0.82	4	4	0	1.12
AT1G10960.1	| Symbols: ATFD1, FD1 | ferredoxin 1 | chr1:3664445-3664891 FORWARD LENGTH=148
AT1G11360.1	| Symbols: | Adenine nucleotide alpha hydrolases-like superfamily protein | chr1:3822171-3822899 REVERSE LENGTH=242
AT1G11430.1	| Symbols: | plastid developmental protein DAG, putative | chr1:3847273-3848938 FORWARD LENGTH=232													5	5	5	5					3	3	3	3	8	9	9	9	4	4	4	4	3	4	4	4
AT1G11580.1	| Symbols: ATPMEPCRA, PMEPCRA | methylesterase PCR A | chr1:3888730-3890649 FORWARD LENGTH=557	16	34	34	34	3	5	5	5	6	8	8	8	23	109	109	109	23	68	68	68	24	61	61	61	11	15	15	15	8	13	13	13	6	8	8	8	2	3	3	3	2	3	3	3	2	2	2	2
AT1G11650.2	| Symbols: ATRBP45B, RBP45B | RNA-binding (RRM/RBD/RNP motifs) family protein | chr1:3914895-3917941 FORWARD LENGTH=405																									2	3	3	3	4	4	4	4					3	5	5	5	3	4	4	4	7	9	9	9
AT1G11660.1	| Symbols: | heat shock protein 70 (Hsp 70) family protein | chr1:3921056-3924347 FORWARD LENGTH=763
AT1G11680.1	| Symbols: CYP51G1, EMB1738, CYP51A2, CYP51 | CYTOCHROME P450 51G1 | chr1:3938925-3940585 FORWARD LENGTH=488					3	3	3	3	3	3	3	3
AT1G11720.1	| Symbols: ATSS3, SS3 | starch synthase 3 | chr1:3952460-3956840 FORWARD LENGTH=1042
AT1G11750.1	| Symbols: CLPP6, NCLPP1, NCLPP6 | CLP protease proteolytic subunit 6 | chr1:3967609-3969535 FORWARD LENGTH=271
AT1G11840.2	| Symbols: ATGLX1, GLX1 | glyoxalase I homolog | chr1:3996045-3997518 FORWARD LENGTH=283													9	12	11	11.55	7	9	8	8.55	12	17	15	16.1	16	51	40	46.05	17	48	44	46.2	22	66	52	59.7	11	15	14	14.55	13	23	19	21.2	9	12	9	10.65
AT1G11860.2	| Symbols: | Glycine cleavage T-protein family | chr1:4001801-4003245 FORWARD LENGTH=408													24	40	40	40	17	31	31	31	27	53	53	53	10	15	15	15	6	6	6	6	8	10	10	10	13	13	13	13	8	10	10	10	8	11	11	11
AT1G11870.2	| Symbols: ATSRS, SRS | Seryl-tRNA synthetase | chr1:4003895-4006556 FORWARD LENGTH=514
AT1G11890.1	| Symbols: SEC22, ATSEC22 | Synaptobrevin family protein | chr1:4011509-4012835 FORWARD LENGTH=218	5	5	5	5	2	2	2	2	2	2	2	2	6	7	7	7	5	5	5	5	5	7	7	7
AT1G11910.1	| Symbols: APA1, ATAPA1 | aspartic proteinase A1 | chr1:4017119-4019874 REVERSE LENGTH=506					10	10	8	9.69	11	11	8	10.54
AT1G11930.2	| Symbols: | Predicted pyridoxal phosphate-dependent enzyme, YBL036C type | chr1:4028783-4030298 FORWARD LENGTH=255																																					5	5	5	5	5	5	5	5	6	8	8	8
AT1G12000.1	| Symbols: | Phosphofructokinase family protein | chr1:4050159-4053727 REVERSE LENGTH=566																																					13	15	14	14.96	14	20	17	19.88	21	26	18	25.68
AT1G12050.1	| Symbols: | fumarylacetoacetase, putative | chr1:4072904-4075856 FORWARD LENGTH=421																																					7	8	8	8	7	8	8	8	10	13	13	13
AT1G12140.1	| Symbols: FMO GS-OX5 | flavin-monooxygenase glucosinolate S-oxygenase 5 | chr1:4121386-4123366 FORWARD LENGTH=459
AT1G12230.1	| Symbols: | Aldolase superfamily protein | chr1:4148050-4150708 FORWARD LENGTH=405
AT1G12250.1	| Symbols: | Pentapeptide repeat-containing protein | chr1:4159287-4161269 FORWARD LENGTH=280													2	2	2	2	3	3	3	3	2	3	3	3
AT1G12270.1	| Symbols: Hop1 | stress-inducible protein, putative | chr1:4172105-4174575 FORWARD LENGTH=572
AT1G12310.1	| Symbols: | Calcium-binding EF-hand family protein | chr1:4187500-4187946 REVERSE LENGTH=148																																					4	4	0	2.22	4	4	0	2.22	9	11	5	8.33
AT1G12350.1	| Symbols: ATCOAB, COAB | 4-phospho-panto-thenoylcysteine synthetase | chr1:4198870-4200633 FORWARD LENGTH=317																																					2	2	2	2	2	2	2	2	9	12	12	12
AT1G12410.1	| Symbols: CLPR2, NCLPP2, CLP2 | CLP protease proteolytic subunit 2 | chr1:4223099-4224954 FORWARD LENGTH=279
AT1G12780.1	| Symbols: UGE1, ATUGE1 | UDP-D-glucose/UDP-D-galactose 4-epimerase 1 | chr1:4356124-4358120 REVERSE LENGTH=351																																					13	15	11	13.62	12	15	9	13.1	24	39	24	33.42
AT1G12800.1	| Symbols: | Nucleic acid-binding, OB-fold-like protein | chr1:4361778-4365189 REVERSE LENGTH=767
AT1G12840.1	| Symbols: DET3, ATVHA-C | vacuolar ATP synthase subunit C (VATC) / V-ATPase C subunit / vacuolar proton pump C subunit (DET3) | chr1:4375584-4378220 FORWARD LENGTH=375					8	10	10	10	5	7	7	7																									14	19	19	19	12	16	16	16	13	18	18	18
AT1G12900.4	| Symbols: GAPA-2 | glyceraldehyde 3-phosphate dehydrogenase A subunit 2 | chr1:4392634-4393850 REVERSE LENGTH=350	3	3	0	1.24	9	13	0	5.11	12	23	3	10.75													2	2	0	0.58					4	6	1	3.06	11	14	3	7.04	10	14	3	7.28	11	20	5	10.93
AT1G12920.1	| Symbols: ERF1-2 | eukaryotic release factor 1-2 | chr1:4396555-4397859 REVERSE LENGTH=434					3	3	1	1.69	4	5	1	2.38
AT1G12930.1	| Symbols: | ARM repeat superfamily protein | chr1:4398588-4405495 REVERSE LENGTH=1005
AT1G13020.1	| Symbols: EIF4B2 | eukaryotic initiation factor 4B2 | chr1:4440927-4443520 REVERSE LENGTH=549													2	3	3	3					2	2	2	2	2	3	3	3	2	2	1	1.5	3	3	1	2
AT1G13060.1	| Symbols: PBE1 | 20S proteasome beta subunit E1 | chr1:4452641-4454663 FORWARD LENGTH=274
AT1G13280.1	| Symbols: AOC4 | allene oxide cyclase 4 | chr1:4547624-4548552 FORWARD LENGTH=254	7	9	8	8.58	2	2	2	2					7	12	11	11.58	5	10	10	10	6	13	13	13	3	3	3	3	4	4	4	4	3	3	3	3
AT1G13320.3	| Symbols: PP2AA3 | protein phosphatase 2A subunit A3 | chr1:4563692-4567348 REVERSE LENGTH=587
AT1G13440.1	| Symbols: GAPC-2, GAPC2 | glyceraldehyde-3-phosphate dehydrogenase C2 | chr1:4608465-4610494 REVERSE LENGTH=338	11	15	0	9.38	18	43	3	28	32	143	11	93.5	7	7	1	4.75	5	8	0	5	22	57	2	36.38	12	18	0	11.25	14	21	1	13.5	15	26	1	16.62	19	29	3	19.25	14	23	1	14.75	13	21	0	13.12
AT1G13690.1	| Symbols: ATE1 | ATPase E1 | chr1:4693380-4694179 FORWARD LENGTH=177					2	2	2	2	2	2	2	2
AT1G13730.1	| Symbols: | Nuclear transport factor 2 (NTF2) family protein with RNA binding (RRM-RBD-RNP motifs) domain | chr1:4710519-4712332 FORWARD LENGTH=428
AT1G13930.2	| Symbols: | Involved in response to salt stress. Knockout mutants are hypersensitive to salt stress. | chr1:4761091-4761558 FORWARD LENGTH=155													2	2	1	1.53					2	2	1	1.53													7	12	11	11.53	7	11	11	11	7	10	9	9.53
AT1G13950.1	| Symbols: EIF-5A, ELF5A-1, ATELF5A-1, EIF5A | eukaryotic elongation factor 5A-1 | chr1:4773631-4774668 FORWARD LENGTH=158
AT1G14000.1	| Symbols: VIK | VH1-interacting kinase | chr1:4797606-4800043 FORWARD LENGTH=438													13	17	17	17	7	11	11	11	17	22	21	21.76	6	7	7	7	6	6	6	6	6	6	6	6
AT1G14030.1	| Symbols: | Rubisco methyltransferase family protein | chr1:4805493-4807440 REVERSE LENGTH=482
AT1G14130.1	| Symbols: | 2-oxoglutarate (2OG) and Fe(II)-dependent oxygenase superfamily protein | chr1:4836041-4837040 REVERSE LENGTH=308																																					3	3	3	3	3	3	3	3	3	3	3	3
AT1G14210.1	| Symbols: | Ribonuclease T2 family protein | chr1:4856902-4857941 REVERSE LENGTH=247													4	4	4	4	3	3	3	3	4	5	5	5	8	9	9	9	7	8	8	8	8	13	13	13	8	10	10	10	9	10	10	10	7	9	9	9
AT1G14300.1	| Symbols: | ARM repeat superfamily protein | chr1:4882654-4884686 REVERSE LENGTH=339
AT1G14320.1	| Symbols: SAC52, RPL10, RPL10A | Ribosomal protein L16p/L10e family protein | chr1:4888270-4889408 FORWARD LENGTH=220					5	6	2	4.4	8	14	2	9.2
AT1G14410.1	| Symbols: ATWHY1, PTAC1, WHY1 | ssDNA-binding transcriptional regulator | chr1:4929352-4930810 REVERSE LENGTH=263					4	4	4	4	4	4	4	4																									3	4	3	3.5	4	5	4	4.5	2	3	3	3
AT1G14510.1	| Symbols: AL7 | alfin-like 7 | chr1:4962171-4964154 REVERSE LENGTH=252
AT1G14540.1	| Symbols: | Peroxidase superfamily protein | chr1:4974233-4975600 REVERSE LENGTH=315													6	7	7	7	5	6	6	6	2	2	2	2
AT1G14570.2	| Symbols: | UBX domain-containing protein | chr1:4983770-4987192 FORWARD LENGTH=468
AT1G14610.1	| Symbols: TWN2, VALRS | valyl-tRNA synthetase / valine--tRNA ligase (VALRS) | chr1:5008502-5014486 REVERSE LENGTH=1108																																					43	55	55	55	36	46	46	46	32	49	49	49
AT1G14640.1	| Symbols: | SWAP (Suppressor-of-White-APricot)/surp domain-containing protein | chr1:5023656-5025955 FORWARD LENGTH=735
AT1G14650.2	| Symbols: | SWAP (Suppressor-of-White-APricot)/surp domain-containing protein / ubiquitin family protein | chr1:5028077-5030520 FORWARD LENGTH=785													4	4	4	4	3	3	3	3	5	5	5	5	2	2	2	2	3	3	3	3
AT1G14710.2	| Symbols: | hydroxyproline-rich glycoprotein family protein | chr1:5062168-5064697 REVERSE LENGTH=601													13	14	14	14	7	8	8	8	15	16	16	16	19	21	21	21	9	10	10	10	13	14	14	14	10	12	12	12	7	7	7	7	7	7	7	7
AT1G14810.1	| Symbols: | semialdehyde dehydrogenase family protein | chr1:5102684-5104633 REVERSE LENGTH=375					4	4	4	4	5	5	5	5													2	3	3	3					2	2	2	2	2	2	2	2	2	2	2	2
AT1G14980.1	| Symbols: CPN10 | chaperonin 10 | chr1:5165930-5166654 REVERSE LENGTH=98													3	3	3	3	4	4	4	4	4	5	5	5	3	4	4	4	5	6	6	6	3	3	3	3	3	3	3	3	3	4	4	4	3	3	3	3
AT1G15000.1	| Symbols: scpl50 | serine carboxypeptidase-like 50 | chr1:5168613-5169947 FORWARD LENGTH=444																																					8	9	9	9	5	5	5	5	6	6	6	6
AT1G15130.1	| Symbols: | Endosomal targeting BRO1-like domain-containing protein | chr1:5206217-5209848 REVERSE LENGTH=846
AT1G15140.1	| Symbols: | FAD/NAD(P)-binding oxidoreductase | chr1:5210403-5212137 REVERSE LENGTH=295																																					8	9	9	9	5	6	6	6	8	8	8	8
AT1G15290.1	| Symbols: | Tetratricopeptide repeat (TPR)-like superfamily protein | chr1:5257327-5264814 REVERSE LENGTH=1608
AT1G15340.1	| Symbols: MBD10 | methyl-CPG-binding domain 10 | chr1:5275895-5277474 REVERSE LENGTH=384
AT1G15390.1	| Symbols: PDF1A, ATDEF1 | peptide deformylase 1A | chr1:5294653-5295625 FORWARD LENGTH=269																									7	7	7	7	6	6	6	6	5	8	8	8	2	2	2	2	4	4	4	4
AT1G15470.1	| Symbols: | Transducin/WD40 repeat-like superfamily protein | chr1:5315838-5317696 FORWARD LENGTH=333
AT1G15500.1	| Symbols: ATNTT2 | TLC ATP/ADP transporter | chr1:5326426-5328688 FORWARD LENGTH=618					2	2	1	1.33	3	3	1	1.67
AT1G15690.1	| Symbols: AVP1, ATAVP3, AVP-3, AtVHP1;1 | Inorganic H pyrophosphatase family protein | chr1:5399115-5402185 FORWARD LENGTH=770					8	9	9	9	4	4	4	4
AT1G15750.3	| Symbols: WSIP1, TPL | Transducin family protein / WD-40 repeat family protein | chr1:5415086-5420359 REVERSE LENGTH=1131	5	5	1	2.19					5	5	0	1.53	48	64	19	37.48	34	39	12	23.28	45	59	17	35.38	37	44	6	21.39	23	28	5	14.12	16	19	3	8.78					6	6	0	2.02	2	2	0	0.55
AT1G15790.1	| Symbols: | unknown protein; BEST Arabidopsis thaliana protein match is: unknown protein (TAIR:AT1G15780.1); Has 170 Blast hits to 94 proteins in 14 species: Archae - 0; Bacteria - 0; Metazoa - 0; Fungi - 0; Plants - 170; Viruses - 0; Other Eukary													5	8	8	8	5	6	6	6	5	7	7	7
AT1G15860.2	| Symbols: | Domain of unknown function (DUF298) | chr1:5455055-5456741 FORWARD LENGTH=227
AT1G15870.1	| Symbols: | Mitochondrial glycoprotein family protein | chr1:5457153-5458245 FORWARD LENGTH=242
AT1G15910.1	| Symbols: | XH/XS domain-containing protein | chr1:5465951-5468723 FORWARD LENGTH=634
AT1G15930.2	| Symbols: | Ribosomal protein L7Ae/L30e/S12e/Gadd45 family protein | chr1:5471702-5472741 FORWARD LENGTH=144					5	7	6	6.47	6	9	8	8.47	2	2	1	1.47	3	3	2	2.47	3	3	2	2.47	5	5	4	4.47	4	6	5	5.47	4	4	3	3.47	7	9	8	8.47	6	9	8	8.47	2	4	3	3.47
AT1G15950.1	| Symbols: CCR1, IRX4, ATCCR1 | cinnamoyl coa reductase 1 | chr1:5478855-5481915 FORWARD LENGTH=344																									4	4	4	4	5	6	6	6	8	9	9	9	5	6	6	6	8	11	11	11	5	5	5	5
AT1G16030.1	| Symbols: Hsp70b | heat shock protein 70B | chr1:5502386-5504326 REVERSE LENGTH=646					4	5	0	0.04	7	13	0	0.22																									2	2	0	0.02	2	4	0	0.03	2	3	0	0.03
AT1G16080.1	| Symbols: | unknown protein; LOCATED IN: apoplast, chloroplast stroma, chloroplast, chloroplast envelope; EXPRESSED IN: 23 plant structures; EXPRESSED DURING: 14 growth stages; Has 81 Blast hits to 81 proteins in 28 species: Archae - 0; Bacteria -
AT1G16190.1	| Symbols: RAD23A | Rad23 UV excision repair protein family | chr1:5543267-5545892 FORWARD LENGTH=368	5	7	3	5.67	2	3	0	2
AT1G16210.1	| Symbols: | unknown protein; CONTAINS InterPro DOMAIN/s: Protein of unknown function DUF1014 (InterPro:IPR010422); Has 16107 Blast hits to 8386 proteins in 1107 species: Archae - 26; Bacteria - 3370; Metazoa - 4013; Fungi - 1516; Plants - 526; Vir													4	4	4	4	6	9	9	9	2	2	2	2
AT1G16300.1	| Symbols: GAPCP-2 | glyceraldehyde-3-phosphate dehydrogenase of plastid 2 | chr1:5574433-5577406 FORWARD LENGTH=420					4	4	0	1.85	8	9	3	5.77																									2	2	0	0.92	2	2	0	0.92	3	3	1	1.92
AT1G16340.2	| Symbols: ATKDSA2, ATKSDA | Aldolase superfamily protein | chr1:5588123-5590469 REVERSE LENGTH=291																																									2	2	0	0.67	3	4	0	1.33
AT1G16350.1	| Symbols: | Aldolase-type TIM barrel family protein | chr1:5590951-5592872 FORWARD LENGTH=502
AT1G16460.4	| Symbols: RDH2 | rhodanese homologue 2 | chr1:5619848-5621981 REVERSE LENGTH=318
AT1G16470.2	| Symbols: PAB1 | proteasome subunit PAB1 | chr1:5623122-5625439 FORWARD LENGTH=235
AT1G16870.1	| Symbols: | mitochondrial 28S ribosomal protein S29-related | chr1:5770964-5773157 REVERSE LENGTH=480					2	3	3	3	7	10	10	10
AT1G16880.1	| Symbols: | uridylyltransferase-related | chr1:5773796-5776125 FORWARD LENGTH=290
AT1G16890.2	| Symbols: UBC36, UBC13B | ubiquitin-conjugating enzyme 36 | chr1:5776550-5778327 REVERSE LENGTH=153													12	27	9	18	10	22	10	16	14	27	9	18	8	12	6	9	5	8	4	6	8	9	3	6	2	3	3	3	2	2	2	2
AT1G16920.1	| Symbols: RAB11, ATRABA1B, RABA1b | RAB GTPase homolog A1B | chr1:5787489-5789147 REVERSE LENGTH=216					4	4	1	1.89	4	4	0	1.64
AT1G16970.1	| Symbols: KU70, ATKU70 | KU70 homolog | chr1:5801159-5805724 REVERSE LENGTH=621
AT1G17020.1	| Symbols: SRG1, ATSRG1 | senescence-related gene 1 | chr1:5820258-5821741 FORWARD LENGTH=358
AT1G17100.1	| Symbols: | SOUL heme-binding family protein | chr1:5844766-5845539 FORWARD LENGTH=232
AT1G17160.1	| Symbols: | pfkB-like carbohydrate kinase family protein | chr1:5867678-5869215 FORWARD LENGTH=379
AT1G17170.1	| Symbols: ATGSTU24, GST, GSTU24 | glutathione S-transferase TAU 24 | chr1:5869895-5870691 FORWARD LENGTH=218																																					5	6	4	4.51	5	7	2	3.21	9	10	8	8.51
AT1G17180.1	| Symbols: ATGSTU25, GSTU25 | glutathione S-transferase TAU 25 | chr1:5872208-5872958 FORWARD LENGTH=221
AT1G17190.1	| Symbols: ATGSTU26, GSTU26 | glutathione S-transferase tau 26 | chr1:5875452-5876375 FORWARD LENGTH=220																																									3	3	2	2.14	2	3	3	3
AT1G17210.1	| Symbols: ATILP1, ILP1 | IAP-like protein 1 | chr1:5880502-5884657 REVERSE LENGTH=958
AT1G17290.1	| Symbols: AlaAT1 | alanine aminotransferas | chr1:5922771-5926093 FORWARD LENGTH=543
AT1G17370.1	| Symbols: UBP1B | oligouridylate binding protein 1B | chr1:5951842-5954825 REVERSE LENGTH=419																																					3	3	1	1.35	2	2	1	1.18	4	4	2	2.35
AT1G17470.2	| Symbols: ATDRG1, ATDRG, DRG1 | developmentally regulated G-protein 1 | chr1:6003442-6006155 FORWARD LENGTH=399					3	5	5	5	2	3	3	3
AT1G17690.1	| Symbols: NOF1 | FUNCTIONS IN: molecular_function unknown; INVOLVED IN: biological_process unknown; LOCATED IN: nucleus; EXPRESSED IN: 24 plant structures; EXPRESSED DURING: 13 growth stages; CONTAINS InterPro DOMAIN/s: Digestive organ expansion fa
AT1G17720.1	| Symbols: ATB BETA | Protein phosphatase 2A, regulatory subunit PR55 | chr1:6093949-6098065 REVERSE LENGTH=501
AT1G17720.2	| Symbols: ATB BETA | Protein phosphatase 2A, regulatory subunit PR55 | chr1:6093949-6098065 REVERSE LENGTH=500
AT1G17745.2	| Symbols: PGDH | D-3-phosphoglycerate dehydrogenase | chr1:6101157-6104979 FORWARD LENGTH=651																																					2	2	1	1.47	2	2	1	1.47
AT1G17860.1	| Symbols: | Kunitz family trypsin and protease inhibitor protein | chr1:6149343-6149933 FORWARD LENGTH=196													6	9	9	9	6	8	8	8	6	7	7	7	7	8	8	8	5	6	6	6	4	5	5	5
AT1G17880.1	| Symbols: BTF3, ATBTF3 | basic transcription factor 3 | chr1:6152572-6153425 REVERSE LENGTH=165					7	7	6	6.58	7	12	12	12
AT1G17890.1	| Symbols: GER2 | NAD(P)-binding Rossmann-fold superfamily protein | chr1:6154478-6155596 REVERSE LENGTH=328																									6	8	6	7.3	6	9	8	8.65	14	24	22	23.3	18	22	17	20.25	12	20	16	18.6	12	16	14	15.3
AT1G18070.2	| Symbols: | Translation elongation factor EF1A/initiation factor IF2gamma family protein | chr1:6214236-6218211 REVERSE LENGTH=532																																					3	3	3	3	6	7	7	7	6	6	6	6
AT1G18080.1	| Symbols: ATARCA, RACK1A_AT, RACK1A | Transducin/WD40 repeat-like superfamily protein | chr1:6222325-6223901 FORWARD LENGTH=327	16	21	19	20.21	18	35	30	33.03	19	45	40	43.03	22	123	92	116.38	18	50	43	47.24	18	55	49	52.63	20	66	60	63.63	18	46	41	44.03	19	58	53	56.03	18	24	22	23.21	15	32	30	31.21	15	31	28	29.82
AT1G18210.1	| Symbols: | Calcium-binding EF-hand family protein | chr1:6268273-6268785 REVERSE LENGTH=170					3	3	3	3	4	4	4	4													3	3	3	3	3	3	3	3	3	4	4	4	5	5	5	5	3	3	3	3	5	6	6	6
AT1G18270.1	| Symbols: | ketose-bisphosphate aldolase class-II family protein | chr1:6283634-6293772 REVERSE LENGTH=1373
AT1G18450.1	| Symbols: ATARP4, ARP4 | actin-related protein 4 | chr1:6348199-6351766 FORWARD LENGTH=441
AT1G18500.1	| Symbols: MAML-4, IPMS1 | methylthioalkylmalate synthase-like 4 | chr1:6369347-6372861 FORWARD LENGTH=631					2	2	1	1.47	5	6	2	3.89
AT1G18540.1	| Symbols: | Ribosomal protein L6 family protein | chr1:6377448-6378548 REVERSE LENGTH=233					15	24	7	15.5	14	30	11	20.5
AT1G18640.2	| Symbols: PSP | 3-phosphoserine phosphatase | chr1:6416524-6418245 REVERSE LENGTH=295																																					11	13	13	13	10	11	11	11	3	4	4	4
AT1G18800.1	| Symbols: NRP2 | NAP1-related protein 2 | chr1:6481466-6483463 REVERSE LENGTH=256
AT1G18980.1	| Symbols: | RmlC-like cupins superfamily protein | chr1:6557364-6558026 REVERSE LENGTH=220																	2	2	2	2	2	2	2	2
AT1G19120.1	| Symbols: | Small nuclear ribonucleoprotein family protein | chr1:6608288-6609162 FORWARD LENGTH=128
AT1G19130.1	| Symbols: | CONTAINS InterPro DOMAIN/s: Protein of unknown function DUF985 (InterPro:IPR009327), RmlC-like jelly roll fold (InterPro:IPR014710); Has 1465 Blast hits to 1465 proteins in 584 species: Archae - 10; Bacteria - 1038; Metazoa - 19; Fungi																																					10	18	18	18	10	24	24	24	10	19	19	19
AT1G19140.1	| Symbols: | FUNCTIONS IN: molecular_function unknown; INVOLVED IN: ubiquinone biosynthetic process; LOCATED IN: mitochondrion; EXPRESSED IN: 24 plant structures; EXPRESSED DURING: 15 growth stages; CONTAINS InterPro DOMAIN/s: COQ9 (InterPro:IPR013																									9	10	10	10	2	3	3	3	10	14	14	14	8	9	9	9	4	4	4	4	5	7	7	7
AT1G19520.1	| Symbols: NFD5 | pentatricopeptide (PPR) repeat-containing protein | chr1:6760032-6762581 FORWARD LENGTH=725
AT1G19570.1	| Symbols: DHAR1, ATDHAR1, DHAR5 | dehydroascorbate reductase | chr1:6773462-6774413 REVERSE LENGTH=213
AT1G19580.2	| Symbols: GAMMA CA1 | gamma carbonic anhydrase 1 | chr1:6774937-6776845 FORWARD LENGTH=220					4	4	1	1.2	2	2	1	1.07
AT1G19730.1	| Symbols: ATTRX4, ATH4 | Thioredoxin superfamily protein | chr1:6823163-6824020 REVERSE LENGTH=119													4	4	4	4	4	4	4	4	8	9	9	9	6	7	7	7	8	9	9	9
AT1G19870.1	| Symbols: iqd32 | IQ-domain 32 | chr1:6895400-6898539 REVERSE LENGTH=794
AT1G19880.1	| Symbols: | Regulator of chromosome condensation (RCC1) family protein | chr1:6900648-6903818 REVERSE LENGTH=538
AT1G19920.1	| Symbols: APS2, ASA1 | Pseudouridine synthase/archaeosine transglycosylase-like family protein | chr1:6914835-6916657 REVERSE LENGTH=476
AT1G20010.1	| Symbols: TUB5 | tubulin beta-5 chain | chr1:6938033-6940481 REVERSE LENGTH=449	4	4	0	0.27	14	23	0	1.9																					2	2	0	0.13	3	3	0	0.2
AT1G20020.1	| Symbols: ATLFNR2, FNR2 | ferredoxin-NADP(+)-oxidoreductase 2 | chr1:6942851-6944868 FORWARD LENGTH=369																																					19	30	28	28.95	19	30	27	28.43	17	30	28	28.95
AT1G20110.1	| Symbols: | RING/FYVE/PHD zinc finger superfamily protein | chr1:6971554-6974578 FORWARD LENGTH=601																	2	2	2	2	5	5	5	5	2	2	2	2	3	3	3	3	6	6	6	6	2	2	2	2	3	3	3	3
AT1G20200.1	| Symbols: EMB2719, HAP15 | PAM domain (PCI/PINT associated module) protein | chr1:7001409-7004154 REVERSE LENGTH=488					9	9	4	7.18	16	20	13	17.45
AT1G20220.1	| Symbols: | Alba DNA/RNA-binding protein | chr1:7005090-7007285 REVERSE LENGTH=315					2	2	2	2	6	6	5	5.53
AT1G20225.1	| Symbols: | Thioredoxin superfamily protein | chr1:7007966-7009318 REVERSE LENGTH=233																																									3	4	4	4	4	7	7	7
AT1G20330.1	| Symbols: SMT2, CVP1, FRL1 | sterol methyltransferase 2 | chr1:7038968-7040053 REVERSE LENGTH=361					2	2	2	2	4	4	4	4
AT1G20370.1	| Symbols: | Pseudouridine synthase family protein | chr1:7051846-7053588 REVERSE LENGTH=549
AT1G20410.1	| Symbols: | Pseudouridine synthase family protein | chr1:7079049-7082504 REVERSE LENGTH=504
AT1G20440.1	| Symbols: COR47, RD17, AtCOR47 | cold-regulated 47 | chr1:7084722-7085664 REVERSE LENGTH=265
AT1G20450.2	| Symbols: LTI29, LTI45, ERD10 | Dehydrin family protein | chr1:7088235-7089107 REVERSE LENGTH=259
AT1G20510.1	| Symbols: OPCL1 | OPC-8:0 CoA ligase1 | chr1:7103645-7105856 REVERSE LENGTH=546													3	4	4	4					2	3	3	3
AT1G20540.1	| Symbols: | Transducin/WD40 repeat-like superfamily protein | chr1:7112652-7115191 FORWARD LENGTH=351
AT1G20580.1	| Symbols: | Small nuclear ribonucleoprotein family protein | chr1:7128979-7130371 FORWARD LENGTH=131					3	3	2	2.56	4	5	3	4.11
AT1G20620.1	| Symbols: CAT3, SEN2, ATCAT3 | catalase 3 | chr1:7143142-7146193 FORWARD LENGTH=492	20	26	16	20.8	15	23	13	17.8	6	7	4	5.42	17	27	17	22.14	13	18	9	13.44	13	29	15	22.1	7	10	5	7.49	5	6	3	4.42	3	4	2	2.89					2	2	1	1.36	2	2	0	0.89
AT1G20630.1	| Symbols: CAT1 | catalase 1 | chr1:7146812-7149609 FORWARD LENGTH=492	20	28	19	22.83	12	19	10	13.83	6	8	4	5.76	16	31	22	26.16	14	21	13	16.51	19	39	25	31.39	10	13	9	10.79	6	9	7	7.82	5	5	3	3.82	3	3	2	2.5	5	6	4	4.82	2	2	1	1.32
AT1G20696.2	| Symbols: HMGB3, NFD3, NFD03 | high mobility group B3 | chr1:7179825-7181193 FORWARD LENGTH=147
AT1G20760.1	| Symbols: | Calcium-binding EF hand family protein | chr1:7209515-7214773 FORWARD LENGTH=1019	6	6	6	6	4	5	5	5
AT1G20810.1	| Symbols: | FKBP-like peptidyl-prolyl cis-trans isomerase family protein | chr1:7232025-7233367 FORWARD LENGTH=232													4	4	4	4	2	2	2	2	2	2	2	2
AT1G20950.1	| Symbols: | Phosphofructokinase family protein | chr1:7297467-7301336 REVERSE LENGTH=614																									10	11	8	9.5	7	7	6	6.5	15	20	10	15	31	38	24	31	32	39	24	31.5	25	30	15	22.5
AT1G20960.1	| Symbols: emb1507 | U5 small nuclear ribonucleoprotein helicase, putative | chr1:7302591-7309914 REVERSE LENGTH=2171					10	11	11	11	29	32	32	32
AT1G20970.1	| Symbols: | FUNCTIONS IN: molecular_function unknown; INVOLVED IN: biological_process unknown; LOCATED IN: plasma membrane, vacuole; EXPRESSED IN: guard cell, cultured cell; BEST Arabidopsis thaliana protein match is: proton pump interactor 1 (TAI
AT1G21065.1	| Symbols: | unknown protein; INVOLVED IN: biological_process unknown; LOCATED IN: chloroplast; EXPRESSED IN: 22 plant structures; EXPRESSED DURING: 13 growth stages; CONTAINS InterPro DOMAIN/s: Uncharacterised protein family UPF0047 (InterPro:IPR0													7	7	7	7	3	3	3	3	4	4	4	4	4	4	4	4					3	3	3	3
AT1G21190.1	| Symbols: | Small nuclear ribonucleoprotein family protein | chr1:7419989-7420856 REVERSE LENGTH=97
AT1G21350.2	| Symbols: | Thioredoxin superfamily protein | chr1:7477376-7479012 REVERSE LENGTH=225																									4	4	4	4					2	2	2	2	3	3	3	3	4	5	5	5	3	4	4	4
AT1G21380.1	| Symbols: | Target of Myb protein 1 | chr1:7485806-7488032 REVERSE LENGTH=506
AT1G21440.1	| Symbols: | Phosphoenolpyruvate carboxylase family protein | chr1:7502325-7504103 REVERSE LENGTH=336																																					2	2	2	2	3	3	3	3	5	7	7	7
AT1G21600.2	| Symbols: PTAC6 | plastid transcriptionally active 6 | chr1:7571514-7573782 REVERSE LENGTH=328
AT1G21630.1	| Symbols: | Calcium-binding EF hand family protein | chr1:7581457-7587796 FORWARD LENGTH=1218													3	3	3	3	2	2	2	2	5	5	5	5
AT1G21660.1	| Symbols: | Chaperone DnaJ-domain superfamily protein | chr1:7605924-7608835 FORWARD LENGTH=523																																					2	2	2	2	2	2	2	2
AT1G21670.1	| Symbols: | LOCATED IN: cell wall, plant-type cell wall; EXPRESSED IN: 23 plant structures; EXPRESSED DURING: 14 growth stages; CONTAINS InterPro DOMAIN/s: WD40-like Beta Propeller (InterPro:IPR011659), Six-bladed beta-propeller, TolB-like (InterP													22	29	29	29	14	16	16	16	21	25	25	25
AT1G21680.1	| Symbols: | DPP6 N-terminal domain-like protein | chr1:7613028-7615148 FORWARD LENGTH=706
AT1G21720.1	| Symbols: PBC1 | proteasome beta subunit C1 | chr1:7626394-7628070 FORWARD LENGTH=204
AT1G21750.1	| Symbols: ATPDIL1-1, ATPDI5, PDI5, PDIL1-1 | PDI-like 1-1 | chr1:7645767-7648514 FORWARD LENGTH=501					3	3	3	3	3	3	3	3
AT1G21770.1	| Symbols: | Acyl-CoA N-acyltransferases (NAT) superfamily protein | chr1:7651843-7652249 REVERSE LENGTH=111																									2	3	3	3	2	5	5	5	2	2	2	2
AT1G21880.1	| Symbols: LYM1 | lysm domain GPI-anchored protein 1 precursor | chr1:7680689-7682048 FORWARD LENGTH=316																																					2	2	1	1.5	2	2	1	1.5	2	2	1	1.5
AT1G22270.1	| Symbols: | Trm112p-like protein | chr1:7865548-7865922 FORWARD LENGTH=124
AT1G22300.2	| Symbols: GRF10, GF14 EPSILON | general regulatory factor 10 | chr1:7879244-7881103 REVERSE LENGTH=254
AT1G22410.1	| Symbols: | Class-II DAHP synthetase family protein | chr1:7912120-7914742 FORWARD LENGTH=527	2	3	0	1.03	4	4	2	2.69	5	6	4	4.69	2	3	0	1.03	2	3	2	2.34	2	2	2	2	2	2	1	1.34	2	2	1	1.34					5	6	3	3.87	5	5	3	3.69
AT1G22450.1	| Symbols: COX6B, ATCOX6B2 | cytochrome C oxidase 6B | chr1:7925447-7926918 FORWARD LENGTH=191
AT1G22530.1	| Symbols: PATL2 | PATELLIN 2 | chr1:7955773-7958326 REVERSE LENGTH=683
AT1G22650.1	| Symbols: | Plant neutral invertase family protein | chr1:8013529-8015647 REVERSE LENGTH=534
AT1G22660.2	| Symbols: | Polynucleotide adenylyltransferase family protein | chr1:8017410-8021538 FORWARD LENGTH=603
AT1G22730.1	| Symbols: | MA3 domain-containing protein | chr1:8046511-8048769 FORWARD LENGTH=693
AT1G22780.1	| Symbols: PFL, RPS18A, PFL1 | Ribosomal protein S13/S18 family | chr1:8067990-8069163 FORWARD LENGTH=152					9	15	15	15	10	26	26	26
AT1G22800.1	| Symbols: | S-adenosyl-L-methionine-dependent methyltransferases superfamily protein | chr1:8072020-8074039 FORWARD LENGTH=355
AT1G22840.1	| Symbols: CYTC-1, ATCYTC-A | CYTOCHROME C-1 | chr1:8079384-8080286 FORWARD LENGTH=114	4	5	3	4	2	2	1	1.5					6	11	7	9	5	11	6	8.5	4	7	3	5	2	3	2	2.5	3	3	2	2.5	2	2	1	1.5
AT1G22920.1	| Symbols: CSN5A, JAB1, AJH1 | COP9 signalosome 5A | chr1:8109882-8111895 REVERSE LENGTH=357
AT1G22970.1	| Symbols: | unknown protein; BEST Arabidopsis thaliana protein match is: unknown protein (TAIR:AT1G71150.1); Has 134 Blast hits to 132 proteins in 48 species: Archae - 0; Bacteria - 0; Metazoa - 66; Fungi - 10; Plants - 48; Viruses - 0; Other Euka
AT1G23100.1	| Symbols: | GroES-like family protein | chr1:8195867-8196336 FORWARD LENGTH=97																									2	2	2	2	3	4	4	4	2	2	2	2
AT1G23140.1	| Symbols: | Calcium-dependent lipid-binding (CaLB domain) family protein | chr1:8202362-8203172 REVERSE LENGTH=165
AT1G23180.1	| Symbols: | ARM repeat superfamily protein | chr1:8216125-8219515 FORWARD LENGTH=834
AT1G23190.1	| Symbols: PGM3 | Phosphoglucomutase/phosphomannomutase family protein | chr1:8219946-8224186 FORWARD LENGTH=583													14	18	10	13.91	14	17	14	15.47	14	16	11	13.44	18	21	11	15.89	18	24	15	19.4	13	16	10	12.93	28	42	25	33.31	31	43	27	34.82	33	49	28	38.27
AT1G23260.1	| Symbols: MMZ1, UEV1A | MMS ZWEI homologue 1 | chr1:8257209-8258573 REVERSE LENGTH=158																									2	2	0	0.17					2	4	0	0.33	2	2	1	1.08					2	2	1	1.08
AT1G23290.1	| Symbols: RPL27A, RPL27AB | Ribosomal protein L18e/L15 superfamily protein | chr1:8263007-8263447 FORWARD LENGTH=146					4	4	1	2.5	6	7	1	4
AT1G23310.1	| Symbols: GGT1, AOAT1, GGAT1 | glutamate:glyoxylate aminotransferase | chr1:8268720-8271329 REVERSE LENGTH=481																									2	2	0	1.67	4	6	2	5.33	16	20	7	17.83	10	13	4	11.5	13	16	6	14.33	6	6	0	5
AT1G23440.1	| Symbols: | Peptidase C15, pyroglutamyl peptidase I-like | chr1:8321940-8324019 FORWARD LENGTH=217													11	12	11	11.52	11	12	11	11.52	10	12	10	11.04	5	5	5	5	5	5	4	4.52	2	2	2	2
AT1G23740.1	| Symbols: | Oxidoreductase, zinc-binding dehydrogenase family protein | chr1:8398245-8399656 REVERSE LENGTH=386													10	14	14	14	14	16	16	16	5	6	6	6	7	8	8	8	8	9	9	9	3	4	4	4	3	3	3	3	5	5	5	5	3	4	4	4
AT1G23800.1	| Symbols: ALDH2B7, ALDH2B | aldehyde dehydrogenase 2B7 | chr1:8412238-8414804 REVERSE LENGTH=534
AT1G23820.1	| Symbols: SPDS1 | spermidine synthase 1 | chr1:8420278-8422724 FORWARD LENGTH=378
AT1G23860.1	| Symbols: SRZ-21, SRZ21, RSZP21, RSZ21, At-RSZ21 | RS-containing zinc finger protein 21 | chr1:8428091-8429164 REVERSE LENGTH=187
AT1G23900.1	| Symbols: GAMMA-ADAPTIN 1, Gamma-ADR | gamma-adaptin 1 | chr1:8441379-8447152 FORWARD LENGTH=876	2	2	2	2	3	3	3	3	3	3	3	3					3	4	4	4	3	5	5	5
AT1G23960.1	| Symbols: | Protein of unknown function (DUF626) | chr1:8478627-8480006 REVERSE LENGTH=302													3	4	4	4	4	4	4	4	2	2	2	2
AT1G24000.1	| Symbols: | Polyketide cyclase/dehydrase and lipid transport superfamily protein | chr1:8496057-8496526 REVERSE LENGTH=122													7	9	9	9	3	4	4	4	6	7	7	7
AT1G24050.1	| Symbols: | RNA-processing, Lsm domain | chr1:8507057-8508439 FORWARD LENGTH=188																									7	10	10	10	6	8	8	8	6	9	9	9	6	8	8	8	6	7	7	7	4	5	5	5
AT1G24100.1	| Symbols: UGT74B1 | UDP-glucosyl transferase 74B1 | chr1:8525547-8527010 REVERSE LENGTH=460
AT1G24180.1	| Symbols: IAR4 | Thiamin diphosphate-binding fold (THDP-binding) superfamily protein | chr1:8560777-8563382 REVERSE LENGTH=393					8	8	5	6.25	13	15	12	13.25																									9	9	6	7.25	5	5	4	4.42	6	8	3	5.08
AT1G24280.1	| Symbols: G6PD3 | glucose-6-phosphate dehydrogenase 3 | chr1:8609495-8612383 FORWARD LENGTH=599																																									2	2	0	0.51	4	4	0	1.18
AT1G24360.1	| Symbols: | NAD(P)-binding Rossmann-fold superfamily protein | chr1:8640820-8643283 FORWARD LENGTH=319													6	6	6	6	6	7	7	7					2	2	2	2	4	4	4	4					6	7	7	7	5	5	5	5	3	3	3	3
AT1G24450.1	| Symbols: NFD2 | Ribonuclease III family protein | chr1:8664201-8665077 FORWARD LENGTH=191					3	3	3	3	3	4	4	4	5	6	6	6	3	3	3	3
AT1G24510.1	| Symbols: | TCP-1/cpn60 chaperonin family protein | chr1:8685504-8688101 REVERSE LENGTH=535					2	2	2	2	13	16	16	16
AT1G24610.1	| Symbols: | Rubisco methyltransferase family protein | chr1:8720906-8722711 REVERSE LENGTH=476
AT1G25055.1	| Symbols: | F-box family protein | chr1:8806649-8807950 FORWARD LENGTH=433
AT1G25260.1	| Symbols: | Ribosomal protein L10 family protein | chr1:8854163-8855766 REVERSE LENGTH=235					4	4	4	4	3	4	4	4
AT1G25350.1	| Symbols: OVA9 | glutamine-tRNA ligase, putative / glutaminyl-tRNA synthetase, putative / GlnRS, putative | chr1:8889280-8894205 REVERSE LENGTH=795
AT1G25420.1	| Symbols: | Regulator of Vps4 activity in the MVB pathway protein | chr1:8916141-8917980 FORWARD LENGTH=323													6	6	6	6	3	3	3	3	3	3	3	3
AT1G25490.1	| Symbols: RCN1, REGA, ATB BETA BETA, EER1 | ARM repeat superfamily protein | chr1:8951700-8954899 FORWARD LENGTH=588
AT1G26090.1	| Symbols: | P-loop containing nucleoside triphosphate hydrolases superfamily protein | chr1:9020509-9022619 FORWARD LENGTH=455													6	6	6	6	5	5	5	5					4	5	5	5	5	5	5	5	4	4	4	4					2	2	2	2	4	4	4	4
AT1G26110.1	| Symbols: DCP5 | decapping 5 | chr1:9024616-9027556 REVERSE LENGTH=611													4	6	6	6	4	6	6	6	6	11	11	11
AT1G26160.1	| Symbols: | Metal-dependent phosphohydrolase | chr1:9044784-9046945 REVERSE LENGTH=258
AT1G26170.1	| Symbols: | ARM repeat superfamily protein | chr1:9047539-9054438 REVERSE LENGTH=1022
AT1G26300.1	| Symbols: | BSD domain-containing protein | chr1:9096023-9099746 REVERSE LENGTH=316
AT1G26320.1	| Symbols: | Zinc-binding dehydrogenase family protein | chr1:9105240-9107029 FORWARD LENGTH=351																									4	4	1	1.15	3	3	1	1.1	3	5	0	0.24	4	4	2	2.1	7	8	4	4.65	5	5	1	1.65
AT1G26460.1	| Symbols: | Tetratricopeptide repeat (TPR)-like superfamily protein | chr1:9151816-9154407 FORWARD LENGTH=630
AT1G26480.1	| Symbols: GRF12, GF14 IOTA | general regulatory factor 12 | chr1:9156573-9157845 REVERSE LENGTH=268
AT1G26570.1	| Symbols: UGD1, ATUGD1 | UDP-glucose dehydrogenase 1 | chr1:9182801-9184246 FORWARD LENGTH=481					2	2	1	1.29	7	7	3	4.38
AT1G26630.1	| Symbols: FBR12, ATELF5A-2, ELF5A-2 | Eukaryotic translation initiation factor 5A-1 (eIF-5A 1) protein | chr1:9205968-9207098 FORWARD LENGTH=159					4	6	6	6	10	15	13	14.3																									4	5	5	5	2	3	3	3	3	4	4	4
AT1G26660.1	| Symbols: | Prefoldin chaperone subunit family protein | chr1:9212298-9213765 FORWARD LENGTH=152
AT1G26880.1	| Symbols: | Ribosomal protein L34e superfamily protein | chr1:9315640-9316681 REVERSE LENGTH=120					2	2	0	0.83	3	3	1	1.83
AT1G27020.1	| Symbols: | unknown protein; BEST Arabidopsis thaliana protein match is: unknown protein (TAIR:AT1G27030.1); Has 514 Blast hits to 514 proteins in 175 species: Archae - 0; Bacteria - 311; Metazoa - 0; Fungi - 0; Plants - 65; Viruses - 0; Other Euk
AT1G27090.1	| Symbols: | glycine-rich protein | chr1:9404041-9406098 REVERSE LENGTH=420
AT1G27130.1	| Symbols: ATGSTU13, GST12, GSTU13 | glutathione S-transferase tau 13 | chr1:9425582-9426597 FORWARD LENGTH=227																																					10	16	16	16	10	19	19	19	12	19	19	19
AT1G27150.1	| Symbols: | Tetratricopeptide repeat (TPR)-like superfamily protein | chr1:9429177-9432068 FORWARD LENGTH=468
AT1G27310.1	| Symbols: NTF2A | nuclear transport factor 2A | chr1:9484615-9485790 REVERSE LENGTH=122													9	27	27	27	3	4	4	4	7	16	16	16	8	10	10	10	3	4	4	4	7	12	12	12	4	4	4	4	2	2	2	2	3	4	4	4
AT1G27400.1	| Symbols: | Ribosomal protein L22p/L17e family protein | chr1:9515230-9516725 FORWARD LENGTH=176					4	10	10	10	7	21	21	21
AT1G27450.2	| Symbols: APT1, ATAPT1 | adenine phosphoribosyl transferase 1 | chr1:9532421-9533807 FORWARD LENGTH=183					2	2	0	0.67	6	9	0	3													5	7	0	2.33	4	5	0	1.67	3	4	0	1.33	10	15	0	5	10	16	1	6	12	23	1	8.33
AT1G27450.3	| Symbols: APT1 | adenine phosphoribosyl transferase 1 | chr1:9532042-9533807 FORWARD LENGTH=284					2	2	0	1.33	7	10	1	7													5	7	0	4.67	4	5	0	3.33	3	4	0	2.67	12	17	2	12	11	17	2	12	13	24	2	16.67
AT1G27510.1	| Symbols: | Protein of unknown function (DUF3506) | chr1:9554945-9558293 REVERSE LENGTH=651
AT1G27530.1	| Symbols: | CONTAINS InterPro DOMAIN/s: Ubiquitin-conjugating enzyme/RWD-like (InterPro:IPR016135), Ubiquitin-fold modifier-conjugating enzyme 1 (InterPro:IPR014806); Has 269 Blast hits to 269 proteins in 110 species: Archae - 0; Bacteria - 0; Met													6	6	6	6	2	2	2	2	2	2	2	2	5	6	6	6	4	5	5	5	3	3	3	3
AT1G27540.2	| Symbols: | Protein of unknown function (DUF295) | chr1:9566608-9567849 REVERSE LENGTH=383
AT1G27650.1	| Symbols: ATU2AF35A | U2 snRNP auxiliary factor small subunit, putative | chr1:9615152-9616042 FORWARD LENGTH=296
AT1G27680.1	| Symbols: APL2 | ADPGLC-PPase large subunit | chr1:9631630-9634450 FORWARD LENGTH=518
AT1G27970.1	| Symbols: NTF2B | nuclear transport factor 2B | chr1:9746921-9747787 FORWARD LENGTH=126													11	23	23	23	10	20	20	20	11	23	23	23	13	23	23	23	9	14	14	14	11	20	20	20	8	10	10	10	7	10	10	10	8	13	13	13
AT1G28110.1	| Symbols: SCPL45 | serine carboxypeptidase-like 45 | chr1:9804153-9806832 REVERSE LENGTH=461					5	6	6	6	7	9	9	9
AT1G28120.1	| Symbols: | CONTAINS InterPro DOMAIN/s: Ovarian tumour, otubain (InterPro:IPR003323), Ubiquitin thioesterase Otubain (InterPro:IPR016615), Peptidase C65, otubain (InterPro:IPR019400); Has 413 Blast hits to 411 proteins in 139 species: Archae - 0;
AT1G28200.1	| Symbols: FIP1 | FH interacting protein 1 | chr1:9850395-9852300 REVERSE LENGTH=259													10	11	11	11	7	7	7	7	4	4	4	4
AT1G28290.1	| Symbols: AGP31 | arabinogalactan protein 31 | chr1:9889331-9890843 REVERSE LENGTH=359					3	4	4	4	5	6	6	6																									2	2	2	2	3	3	3	3
AT1G28350.1	| Symbols: | Nucleotidylyl transferase superfamily protein | chr1:9944483-9949577 FORWARD LENGTH=748																																					14	18	15	16.97	15	17	15	16.31	19	26	21	24.28
AT1G28580.1	| Symbols: | GDSL-like Lipase/Acylhydrolase superfamily protein | chr1:10044603-10046379 REVERSE LENGTH=390
AT1G28680.1	| Symbols: | HXXXD-type acyl-transferase family protein | chr1:10078222-10079763 FORWARD LENGTH=451
AT1G29030.1	| Symbols: | Apoptosis inhibitory protein 5 (API5) | chr1:10129201-10133697 REVERSE LENGTH=556
AT1G29150.1	| Symbols: ATS9, RPN6 | non-ATPase subunit 9 | chr1:10181240-10182499 FORWARD LENGTH=419					7	7	7	7	12	14	14	14	2	2	2	2	3	3	3	3	8	8	8	8	12	15	15	15	8	9	9	9	10	11	11	11	13	16	16	16	13	14	14	14	8	9	9	9
AT1G29250.1	| Symbols: | Alba DNA/RNA-binding protein | chr1:10223461-10224592 REVERSE LENGTH=130					3	3	3	3	10	12	11	11.82
AT1G29350.1	| Symbols: | Kinase-related protein of unknown function (DUF1296) | chr1:10268761-10273613 REVERSE LENGTH=831
AT1G29370.1	| Symbols: | Kinase-related protein of unknown function (DUF1296) | chr1:10278080-10283024 REVERSE LENGTH=831
AT1G29810.1	| Symbols: | Transcriptional coactivator/pterin dehydratase | chr1:10435606-10437406 REVERSE LENGTH=187																									4	4	4	4	4	4	4	4	2	3	3	3	2	2	2	2	2	2	2	2	3	3	3	3
AT1G29840.1	| Symbols: | alpha/beta-Hydrolases superfamily protein | chr1:10445735-10447422 REVERSE LENGTH=263																									2	2	1	1.59	2	2	2	2	11	11	10	10.72	8	8	7	7.72	5	5	5	5	4	4	3	3.72
AT1G29850.1	| Symbols: | double-stranded DNA-binding family protein | chr1:10447866-10449630 FORWARD LENGTH=129	4	4	4	4	2	3	3	3					2	2	2	2					2	2	2	2
AT1G29880.1	| Symbols: | glycyl-tRNA synthetase / glycine--tRNA ligase | chr1:10459662-10462781 REVERSE LENGTH=729																																					12	12	11	11.98	13	20	20	20	26	36	35	35.98
AT1G29900.1	| Symbols: CARB | carbamoyl phosphate synthetase B | chr1:10468164-10471976 FORWARD LENGTH=1187													3	3	3	3	3	3	3	3
AT1G29965.1	| Symbols: | Ribosomal protein L18ae/LX family protein | chr1:10498458-10499373 REVERSE LENGTH=178					12	25	1	3.31	16	48	1	5.51
AT1G29990.1	| Symbols: PFD6 | prefoldin 6 | chr1:10507666-10508821 FORWARD LENGTH=129
AT1G30070.2	| Symbols: | SGS domain-containing protein | chr1:10546794-10548072 REVERSE LENGTH=229													6	8	8	8	3	4	4	4	2	2	2	2
AT1G30110.1	| Symbols: ATNUDX25, NUDX25 | nudix hydrolase homolog 25 | chr1:10582700-10583821 FORWARD LENGTH=175
AT1G30120.1	| Symbols: PDH-E1 BETA | pyruvate dehydrogenase E1 beta | chr1:10584350-10586477 REVERSE LENGTH=406					5	6	2	5.2	9	11	2	9.2
AT1G30230.2	| Symbols: | Glutathione S-transferase, C-terminal-like;Translation elongation factor EF1B/ribosomal protein S6 | chr1:10639286-10640601 FORWARD LENGTH=260
AT1G30470.1	| Symbols: | SIT4 phosphatase-associated family protein | chr1:10779423-10786415 FORWARD LENGTH=811
AT1G30510.3	| Symbols: ATRFNR2, RFNR2 | root FNR 2 | chr1:10807150-10808292 REVERSE LENGTH=317																									19	23	14	17.98	11	12	5	8.09	26	47	25	34.72	21	25	17	20.53	18	24	15	18.98	3	3	3	3
AT1G30530.1	| Symbols: UGT78D1 | UDP-glucosyl transferase 78D1 | chr1:10814917-10816374 FORWARD LENGTH=453																																									2	2	0	0.71	3	4	0	1.43
AT1G30540.1	| Symbols: | Actin-like ATPase superfamily protein | chr1:10816951-10819172 REVERSE LENGTH=351
AT1G30580.1	| Symbols: | GTP binding | chr1:10831953-10835454 REVERSE LENGTH=394					2	2	2	2	9	10	10	10													11	12	12	12	8	8	8	8	9	10	10	10	25	38	38	38	24	39	39	39	28	52	52	52
AT1G30600.1	| Symbols: | Subtilase family protein | chr1:10841341-10844906 REVERSE LENGTH=832													12	14	14	14	6	6	6	6	9	13	13	13
AT1G30630.1	| Symbols: | Coatomer epsilon subunit | chr1:10858546-10860173 REVERSE LENGTH=292
AT1G30690.2	| Symbols: | Sec14p-like phosphatidylinositol transfer family protein | chr1:10888284-10890085 FORWARD LENGTH=540
AT1G30910.1	| Symbols: | Molybdenum cofactor sulfurase family protein | chr1:11000912-11002801 FORWARD LENGTH=318																																					7	8	8	8	6	11	11	11	6	8	8	8
AT1G31020.1	| Symbols: ATO2, TO2 | thioredoxin O2 | chr1:11057252-11058703 FORWARD LENGTH=159	5	5	5	5	3	3	3	3
AT1G31070.2	| Symbols: GlcNAc1pUT1 | N-acetylglucosamine-1-phosphate uridylyltransferase 1 | chr1:11084951-11088361 FORWARD LENGTH=505																									5	6	6	6	3	4	4	4	7	7	4	5.14	6	6	3	4.14	5	5	3	3.76	8	8	2	4.29
AT1G31130.1	| Symbols: | unknown protein; FUNCTIONS IN: molecular_function unknown; INVOLVED IN: biological_process unknown; LOCATED IN: cellular_component unknown; EXPRESSED IN: 23 plant structures; EXPRESSED DURING: 13 growth stages; BEST Arabidopsis thalian					2	2	2	2	2	2	2	2
AT1G31160.1	| Symbols: HINT 2 | HISTIDINE TRIAD NUCLEOTIDE-BINDING 2 | chr1:11122880-11124106 REVERSE LENGTH=187																									3	3	3	3					6	9	9	9	6	11	11	11	6	12	12	12	6	14	14	14
AT1G31180.1	| Symbols: ATIMD3, IMD3, IPMDH1 | isopropylmalate dehydrogenase 3 | chr1:11142843-11144617 REVERSE LENGTH=404					5	5	3	4.22	14	18	9	15.28																									10	11	7	9.44	10	13	9	11.44	15	26	17	22.5
AT1G31190.1	| Symbols: IMPL1 | myo-inositol monophosphatase like 1 | chr1:11144861-11146800 FORWARD LENGTH=371
AT1G31220.1	| Symbols: | Formyl transferase | chr1:11157064-11158408 FORWARD LENGTH=292					9	9	9	9	8	9	9	9													3	3	3	3	4	4	4	4	3	3	3	3	9	10	10	10	11	14	14	14	12	14	14	14
AT1G31230.1	| Symbols: AK-HSDH I, AK-HSDH | aspartate kinase-homoserine dehydrogenase i | chr1:11158744-11163055 REVERSE LENGTH=911					5	6	6	6	13	14	13	13.68
AT1G31330.1	| Symbols: PSAF | photosystem I subunit F | chr1:11215011-11215939 REVERSE LENGTH=221					2	2	2	2	4	5	5	5
AT1G31340.1	| Symbols: RUB1, NEDD8, ATRUB1 | related to ubiquitin 1 | chr1:11218076-11219417 REVERSE LENGTH=156	4	6	0	2.14	5	8	0	2.86	2	2	0	0.71	7	22	1	8.5	6	10	1	4.21	9	28	7	14.5	3	4	2	2.71	7	11	8	9.07	2	3	1	1.71
AT1G31360.1	| Symbols: RECQL2, ATRECQ2, MED34 | RECQ helicase L2 | chr1:11232422-11237412 FORWARD LENGTH=705					3	3	3	3	3	3	3	3
AT1G31440.1	| Symbols: | SH3 domain-containing protein | chr1:11256150-11258479 REVERSE LENGTH=439					7	9	9	9	5	6	6	6
AT1G31500.4	| Symbols: | DNAse I-like superfamily protein | chr1:11273821-11276534 REVERSE LENGTH=417
AT1G31730.1	| Symbols: | Adaptin family protein | chr1:11359907-11363916 FORWARD LENGTH=938
AT1G31812.1	| Symbols: ACBP6, ACBP | acyl-CoA-binding protein 6 | chr1:11411132-11412099 REVERSE LENGTH=92													5	6	6	6	5	6	6	6	8	10	10	10	5	9	9	9	9	13	13	13	3	4	4	4
AT1G31860.1	| Symbols: AT-IE, HISN2 | histidine biosynthesis bifunctional protein (HISIE) | chr1:11434250-11436530 REVERSE LENGTH=281
AT1G31910.1	| Symbols: | GHMP kinase family protein | chr1:11459050-11461649 FORWARD LENGTH=505
AT1G32050.1	| Symbols: | SCAMP family protein | chr1:11528616-11530974 FORWARD LENGTH=264					3	3	3	3	3	3	3	3
AT1G32060.1	| Symbols: PRK | phosphoribulokinase | chr1:11532668-11534406 FORWARD LENGTH=395
AT1G32130.1	| Symbols: IWS1, ATIWS1 | Transcription elongation factor (TFIIS) family protein | chr1:11559146-11561786 REVERSE LENGTH=502
AT1G32200.2	| Symbols: ATS1, ACT1 | phospholipid/glycerol acyltransferase family protein | chr1:11602223-11605001 REVERSE LENGTH=459
AT1G32380.1	| Symbols: PRS2 | phosphoribosyl pyrophosphate (PRPP) synthase 2 | chr1:11682033-11684229 FORWARD LENGTH=400					9	10	4	6.17	10	10	3	5.41
AT1G32440.1	| Symbols: PKp3 | plastidial pyruvate kinase 3 | chr1:11712205-11714963 FORWARD LENGTH=571
AT1G32470.1	| Symbols: | Single hybrid motif superfamily protein | chr1:11739479-11740246 REVERSE LENGTH=166
AT1G32500.1	| Symbols: ATNAP6, NAP6 | non-intrinsic ABC protein 6 | chr1:11750091-11751994 REVERSE LENGTH=475
AT1G32580.1	| Symbols: | plastid developmental protein DAG, putative | chr1:11784108-11785430 FORWARD LENGTH=229																													2	2	0	1	3	3	1	2	2	2	0	1	2	2	1	1.5	3	3	1	1.79
AT1G32860.1	| Symbols: | Glycosyl hydrolase superfamily protein | chr1:11907308-11908803 REVERSE LENGTH=426													6	10	10	10	3	3	3	3	6	6	6	6
AT1G32960.1	| Symbols: ATSBT3.3, SBT3.3 | Subtilase family protein | chr1:11945351-11948429 FORWARD LENGTH=777													3	3	3	3	2	2	2	2
AT1G32990.1	| Symbols: PRPL11 | plastid ribosomal protein l11 | chr1:11955827-11957139 FORWARD LENGTH=222	4	4	4	4	3	3	3	3	5	7	7	7	7	9	9	9	7	9	9	9	7	10	10	10	5	5	5	5	6	9	9	9	5	7	7	7	3	3	3	3	4	4	4	4	3	3	3	3
AT1G33040.1	| Symbols: NACA5 | nascent polypeptide-associated complex subunit alpha-like protein 5 | chr1:11966547-11967696 FORWARD LENGTH=209
AT1G33120.1	| Symbols: | Ribosomal protein L6 family | chr1:12010986-12012223 FORWARD LENGTH=194					15	27	22	25.42	16	42	36	40.11	2	2	2	2					12	15	11	13.74	5	5	4	4.68	4	4	3	3.68	4	4	3	3.68	10	13	10	12.05	8	9	7	8.37	4	4	4	4
AT1G33410.2	| Symbols: SAR1 | SUPPRESSOR OF AUXIN RESISTANCE1 | chr1:12109769-12118828 REVERSE LENGTH=1504
AT1G33590.1	| Symbols: | Leucine-rich repeat (LRR) family protein | chr1:12177788-12179221 FORWARD LENGTH=477					5	5	5	5	8	10	10	10	21	34	32	33.92	17	24	22	23.92	6	6	6	6	22	35	33	34.92	15	18	17	17.96	10	11	11	11	20	34	33	33.96	19	28	27	27.96	18	28	28	28
AT1G33610.1	| Symbols: | Leucine-rich repeat (LRR) family protein | chr1:12188910-12190346 FORWARD LENGTH=478													2	2	2	2	2	2	2	2
AT1G33680.1	| Symbols: | KH domain-containing protein | chr1:12204056-12208282 FORWARD LENGTH=763
AT1G33790.2	| Symbols: | jacalin lectin family protein | chr1:12256990-12260432 FORWARD LENGTH=745
AT1G34430.1	| Symbols: EMB3003 | 2-oxoacid dehydrogenases acyltransferase family protein | chr1:12588027-12590084 REVERSE LENGTH=465	2	2	1	1.49	21	29	23	25.93	21	33	27	29.93
AT1G35140.1	| Symbols: PHI-1, EXL7 | Phosphate-responsive 1 family protein | chr1:12852089-12853018 FORWARD LENGTH=309					5	6	6	6	11	12	12	12
AT1G35160.1	| Symbols: GRF4, 14-3-3PHI, GF14 PHI | GF14 protein phi chain | chr1:12867264-12868514 FORWARD LENGTH=267	2	2	0	0.18	3	3	0	0.51	4	5	1	1.82
AT1G35340.2	| Symbols: | ATP-dependent protease La (LON) domain protein | chr1:12978239-12979749 FORWARD LENGTH=210																																					6	6	6	6	2	2	2	2	3	3	3	3
AT1G35420.1	| Symbols: | alpha/beta-Hydrolases superfamily protein | chr1:13026320-13027463 FORWARD LENGTH=310
AT1G35470.2	| Symbols: | SPla/RYanodine receptor (SPRY) domain-containing protein | chr1:13051636-13054922 REVERSE LENGTH=467
AT1G35580.1	| Symbols: CINV1 | cytosolic invertase 1 | chr1:13122460-13124808 REVERSE LENGTH=551
AT1G35620.1	| Symbols: ATPDIL5-2, ATPDI8, PDI8, PDIL5-2 | PDI-like 5-2 | chr1:13156504-13158280 FORWARD LENGTH=440					6	6	6	6	6	6	6	6
AT1G35660.1	| Symbols: | unknown protein; FUNCTIONS IN: molecular_function unknown; INVOLVED IN: biological_process unknown; LOCATED IN: plasma membrane; EXPRESSED IN: 19 plant structures; EXPRESSED DURING: 11 growth stages; Has 309 Blast hits to 256 proteins
AT1G35670.1	| Symbols: ATCDPK2, CPK11, ATCPK11, CDPK2 | calcium-dependent protein kinase 2 | chr1:13205456-13208058 FORWARD LENGTH=495
AT1G35680.1	| Symbols: | Ribosomal protein L21 | chr1:13208777-13210246 FORWARD LENGTH=220					2	2	2	2	2	4	4	4
AT1G35720.1	| Symbols: ANNAT1, OXY5, ATOXY5 | annexin 1 | chr1:13225304-13226939 FORWARD LENGTH=317					4	4	4	4	5	5	5	5
AT1G35780.1	| Symbols: | unknown protein; BEST Arabidopsis thaliana protein match is: unknown protein (TAIR:AT1G78150.2); Has 145 Blast hits to 144 proteins in 16 species: Archae - 0; Bacteria - 0; Metazoa - 0; Fungi - 0; Plants - 145; Viruses - 0; Other Eukar													2	2	2	2	3	3	3	3					2	2	2	2	2	2	2	2	2	2	2	2	3	3	3	3	3	5	5	5	2	2	2	2
AT1G36160.2	| Symbols: ACC1 | acetyl-CoA carboxylase 1 | chr1:13534196-13543773 FORWARD LENGTH=2254
AT1G36180.1	| Symbols: ACC2 | acetyl-CoA carboxylase 2 | chr1:13546047-13558339 FORWARD LENGTH=2355					14	14	13	13.86	22	25	18	24.05
AT1G36280.1	| Symbols: | L-Aspartase-like family protein | chr1:13640600-13642908 FORWARD LENGTH=527																									5	5	3	4	5	5	4	4.5	3	3	2	2.5	11	14	10	12	9	12	11	11.5	8	9	9	9
AT1G36310.1	| Symbols: | S-adenosyl-L-methionine-dependent methyltransferases superfamily protein | chr1:13669644-13670934 FORWARD LENGTH=404
AT1G36370.1	| Symbols: SHM7 | serine hydroxymethyltransferase 7 | chr1:13696240-13698576 REVERSE LENGTH=598													3	3	3	3	2	2	2	2
AT1G36390.2	| Symbols: | Co-chaperone GrpE family protein | chr1:13701811-13703524 REVERSE LENGTH=279
AT1G36730.1	| Symbols: | Translation initiation factor IF2/IF5 | chr1:13898706-13900025 REVERSE LENGTH=439
AT1G37130.1	| Symbols: NIA2, B29, NIA2-1, CHL3, NR, NR2, ATNR2 | nitrate reductase 2 | chr1:14158617-14161652 FORWARD LENGTH=917
AT1G41830.1	| Symbols: SKS6 | SKU5-similar 6 | chr1:15603892-15607802 REVERSE LENGTH=542													11	18	9	12.36	7	8	2	4.24	5	7	0	2.61	6	7	3	4.49	2	2	0	0.75					11	13	10	11.11	9	10	5	6.86	3	3	1	1.74
AT1G41880.1	| Symbols: | Ribosomal protein L35Ae family protein | chr1:15651585-15652427 REVERSE LENGTH=111					4	5	1	2.6	5	12	4	7.2
AT1G42430.2	| Symbols: | unknown protein; FUNCTIONS IN: molecular_function unknown; INVOLVED IN: biological_process unknown; LOCATED IN: cellular_component unknown; BEST Arabidopsis thaliana protein match is: unknown protein (TAIR:AT3G55760.3). | chr1:15891512
AT1G42440.1	| Symbols: | FUNCTIONS IN: molecular_function unknown; INVOLVED IN: ribosome biogenesis; LOCATED IN: nucleus; EXPRESSED IN: 22 plant structures; EXPRESSED DURING: 13 growth stages; CONTAINS InterPro DOMAIN/s: AARP2CN (InterPro:IPR012948), Protein o					2	2	2	2	11	11	11	11
AT1G42480.1	| Symbols: | unknown protein; FUNCTIONS IN: molecular_function unknown; INVOLVED IN: biological_process unknown; LOCATED IN: endomembrane system; EXPRESSED IN: 24 plant structures; EXPRESSED DURING: 13 growth stages; CONTAINS InterPro DOMAIN/s: Pro
AT1G42970.1	| Symbols: GAPB | glyceraldehyde-3-phosphate dehydrogenase B subunit | chr1:16127552-16129584 FORWARD LENGTH=447	2	2	2	2	10	11	10	10.6	13	18	16	17.19
AT1G43170.8	| Symbols: RP1 | ribosomal protein 1 | chr1:16266992-16268631 FORWARD LENGTH=389					29	40	40	40	34	57	57	57
AT1G43190.3	| Symbols: PTB3 | polypyrimidine tract-binding protein 3 | chr1:16275432-16278185 REVERSE LENGTH=430																									2	2	2	2	3	3	3	3	2	2	2	2
AT1G43670.1	| Symbols: | Inositol monophosphatase family protein | chr1:16468184-16470347 FORWARD LENGTH=341
AT1G43690.1	| Symbols: | ubiquitin interaction motif-containing protein | chr1:16478519-16482589 FORWARD LENGTH=599
AT1G43710.1	| Symbols: emb1075 | Pyridoxal phosphate (PLP)-dependent transferases superfamily protein | chr1:16486534-16488298 REVERSE LENGTH=482
AT1G43800.1	| Symbols: | Plant stearoyl-acyl-carrier-protein desaturase family protein | chr1:16577662-16579549 FORWARD LENGTH=391	2	2	2	2	7	11	11	11	16	36	36	36													4	5	4	4.9	5	5	5	5	5	6	6	6	9	12	12	12	4	5	5	5	11	16	16	16
AT1G43890.2	| Symbols: ATRAB18, ATRABC1, RAB18-1, RABC1, ATRAB-C1, RAB18 | RAB GTPASE HOMOLOG B18 | chr1:16646934-16648395 FORWARD LENGTH=212																									5	5	5	5	6	6	6	6	4	4	4	4
AT1G44575.1	| Symbols: NPQ4, PSBS | Chlorophyll A-B binding family protein | chr1:16871768-16873194 FORWARD LENGTH=265					6	8	8	8	5	6	6	6
AT1G44790.1	| Symbols: | ChaC-like family protein | chr1:16912403-16913582 REVERSE LENGTH=199
AT1G44820.1	| Symbols: | Peptidase M20/M25/M40 family protein | chr1:16926351-16928354 FORWARD LENGTH=438
AT1G44835.1	| Symbols: | YbaK/aminoacyl-tRNA synthetase-associated domain | chr1:16939909-16942337 FORWARD LENGTH=307
AT1G44900.2	| Symbols: MCM2 | minichromosome maintenance (MCM2/3/5) family protein | chr1:16970291-16974457 FORWARD LENGTH=934
AT1G45000.1	| Symbols: | AAA-type ATPase family protein | chr1:17009220-17011607 FORWARD LENGTH=399					9	13	2	7.5	19	26	2	13.55
AT1G45145.1	| Symbols: ATTRX5, ATH5, LIV1, TRX5 | thioredoxin H-type 5 | chr1:17075264-17076256 REVERSE LENGTH=118													9	11	11	11	6	8	8	8	12	26	26	26	15	22	22	22	10	18	18	18	6	9	9	9	3	3	3	3	3	6	6	6	2	2	2	2
AT1G45332.1	| Symbols: | Translation elongation factor EFG/EF2 protein | chr1:17172507-17176683 REVERSE LENGTH=754																																									2	2	0	1.08	3	6	0	3.23
AT1G47128.1	| Symbols: RD21, RD21A | Granulin repeat cysteine protease family protein | chr1:17283139-17285609 REVERSE LENGTH=462
AT1G47200.1	| Symbols: WPP2 | WPP domain protein 2 | chr1:17298181-17298723 REVERSE LENGTH=180
AT1G47250.1	| Symbols: PAF2 | 20S proteasome alpha subunit F2 | chr1:17319220-17320900 FORWARD LENGTH=277					2	2	0	0.78	2	2	0	0.78
AT1G47260.1	| Symbols: APFI, GAMMA CA2 | gamma carbonic anhydrase 2 | chr1:17321384-17323347 REVERSE LENGTH=278					12	14	10	12.71	8	9	7	8.38													2	2	1	1.71					2	2	1	1.71
AT1G47340.1	| Symbols: | F-box and associated interaction domains-containing protein | chr1:17354123-17356494 REVERSE LENGTH=459
AT1G47420.1	| Symbols: SDH5 | succinate dehydrogenase 5 | chr1:17395774-17397176 REVERSE LENGTH=257					8	9	9	9	6	8	8	8
AT1G47490.1	| Symbols: ATRBP47C, RBP47C | RNA-binding protein 47C | chr1:17424801-17427182 FORWARD LENGTH=432
AT1G47500.1	| Symbols: ATRBP47C', RBP47C' | RNA-binding protein 47C' | chr1:17432682-17434805 FORWARD LENGTH=434
AT1G47710.1	| Symbols: | Serine protease inhibitor (SERPIN) family protein | chr1:17558271-17560061 FORWARD LENGTH=391
AT1G47840.1	| Symbols: HXK3 | hexokinase 3 | chr1:17616243-17618859 REVERSE LENGTH=493
AT1G47970.1	| Symbols: | unknown protein; FUNCTIONS IN: molecular_function unknown; INVOLVED IN: biological_process unknown; LOCATED IN: cytosol; EXPRESSED IN: 21 plant structures; EXPRESSED DURING: 11 growth stages; Has 93717 Blast hits to 40765 proteins in 1
AT1G48030.2	| Symbols: mtLPD1 | mitochondrial lipoamide dehydrogenase 1 | chr1:17717432-17719141 REVERSE LENGTH=507					12	14	9	11.45	22	32	23	27.41													2	2	1	1.49					15	18	13	15.45	23	33	21	26.88	21	30	21	25.41	22	36	25	30.39
AT1G48050.1	| Symbols: KU80, ATKU80 | Ku80 family protein | chr1:17723498-17726859 FORWARD LENGTH=680					3	3	3	3	5	5	5	5
AT1G48090.1	| Symbols: | calcium-dependent lipid-binding family protein | chr1:17732582-17758194 REVERSE LENGTH=4146					5	5	5	5	8	8	8	8
AT1G48110.1	| Symbols: ECT7 | evolutionarily conserved C-terminal region 7 | chr1:17770339-17772806 REVERSE LENGTH=639																									2	4	4	4					4	5	5	5	3	3	3	3	5	6	6	6	3	3	3	3
AT1G48160.1	| Symbols: | signal recognition particle 19 kDa protein, putative / SRP19, putative | chr1:17786779-17788286 REVERSE LENGTH=145
AT1G48210.2	| Symbols: | Protein kinase superfamily protein | chr1:17799551-17801798 FORWARD LENGTH=363													5	6	5	5.88	6	6	6	6	5	5	4	4.88
AT1G48320.1	| Symbols: | Thioesterase superfamily protein | chr1:17855024-17855577 REVERSE LENGTH=156													3	4	4	4	2	2	2	2	4	5	5	5
AT1G48410.2	| Symbols: AGO1 | Stabilizer of iron transporter SufD / Polynucleotidyl transferase | chr1:17886285-17891892 REVERSE LENGTH=1050					6	7	7	7	10	11	11	11	8	10	7	9.86	8	10	10	10	3	3	3	3	9	11	9	10.91	7	8	8	8	4	5	5	5	11	15	13	14.91	9	9	9	9	11	14	13	13.95
AT1G48420.1	| Symbols: D-CDES, ATACD1, ACD1 | D-cysteine desulfhydrase | chr1:17896767-17898803 REVERSE LENGTH=401																																					7	7	7	7	4	4	4	4	9	10	10	10
AT1G48470.1	| Symbols: GLN1;5 | glutamine synthetase 1;5 | chr1:17913784-17915926 FORWARD LENGTH=353																																					3	7	0	0.46	3	8	2	2.4	3	9	0	0.6
AT1G48480.1	| Symbols: RKL1 | receptor-like kinase 1 | chr1:17918475-17920743 FORWARD LENGTH=655					2	2	1	1.48	2	2	2	2
AT1G48520.1	| Symbols: GATB | GLU-ADT subunit B | chr1:17940185-17942540 FORWARD LENGTH=550													5	6	6	6	2	2	2	2	3	3	3	3																	3	3	3	3	6	6	6	6
AT1G48570.1	| Symbols: | zinc finger (Ran-binding) family protein | chr1:17955455-17957661 REVERSE LENGTH=455
AT1G48600.2	| Symbols: PMEAMT, AtPMEAMT | S-adenosyl-L-methionine-dependent methyltransferases superfamily protein | chr1:17966074-17969077 FORWARD LENGTH=491
AT1G48610.1	| Symbols: | AT hook motif-containing protein | chr1:17971027-17972798 REVERSE LENGTH=212
AT1G48630.1	| Symbols: RACK1B_AT | receptor for activated C kinase 1B | chr1:17981977-17983268 REVERSE LENGTH=326	7	7	2	4.53	12	16	5	10.32	17	24	7	16.32	21	42	16	31.32	19	30	10	20.51	20	42	19	31.91	20	36	14	26.25	17	29	12	21.32	18	32	12	23.32	12	12	6	9.19	13	15	5	10.86	10	12	4	8.12
AT1G48650.2	| Symbols: | DEA(D/H)-box RNA helicase family protein | chr1:17989517-17995169 REVERSE LENGTH=1206
AT1G48760.3	| Symbols: delta-ADR | delta-adaptin | chr1:18036652-18039261 REVERSE LENGTH=869
AT1G48830.1	| Symbols: | Ribosomal protein S7e family protein | chr1:18059854-18060935 REVERSE LENGTH=191					9	10	10	10	12	21	21	21
AT1G48850.1	| Symbols: EMB1144 | chorismate synthase, putative / 5-enolpyruvylshikimate-3-phosphate phospholyase, putative | chr1:18065154-18067956 REVERSE LENGTH=436
AT1G48860.1	| Symbols: | RNA 3'-terminal phosphate cyclase/enolpyruvate transferase, alpha/beta | chr1:18068892-18071331 REVERSE LENGTH=521																																									2	3	2	2.46	16	21	7	13.46
AT1G48900.2	| Symbols: | Signal recognition particle, SRP54 subunit protein | chr1:18085031-18087743 REVERSE LENGTH=431	13	13	8	12.87					2	2	1	1.97	39	46	36	45.74	32	41	29	40.69	33	40	29	39.72	11	12	9	11.92	9	10	7	9.92	17	19	11	18.79	2	2	1	1.97	3	3	2	2.97	4	4	2	3.95
AT1G48920.1	| Symbols: ATNUC-L1, PARL1, NUC-L1 | nucleolin like 1 | chr1:18098186-18101422 FORWARD LENGTH=557					4	5	5	5	7	8	8	8					2	2	2	2	2	2	2	2	3	3	3	3	3	3	3	3	2	2	2	2	4	4	4	4	3	4	4	4
AT1G48940.1	| Symbols: ENODL6, AtENODL6 | early nodulin-like protein 6 | chr1:18105808-18106422 REVERSE LENGTH=177	3	3	3	3	2	2	2	2
AT1G49240.1	| Symbols: ACT8 | actin 8 | chr1:18216539-18217947 FORWARD LENGTH=377	6	6	0	0.56	11	15	0	2.94	15	23	0	5.61
AT1G49300.1	| Symbols: ATRAB7, ATRABG3E, RABG3E | RAB GTPase homolog G3E | chr1:18234842-18236968 FORWARD LENGTH=206
AT1G49340.2	| Symbols: ATPI4K ALPHA | Phosphatidylinositol 3- and 4-kinase family protein | chr1:18252355-18263967 FORWARD LENGTH=2028
AT1G49540.1	| Symbols: ELP2, AtELP2 | elongator protein 2 | chr1:18333767-18337382 REVERSE LENGTH=838
AT1G49600.1	| Symbols: ATRBP47A, RBP47A | RNA-binding protein 47A | chr1:18357236-18360150 REVERSE LENGTH=445
AT1G49630.3	| Symbols: ATPREP2, PREP2 | presequence protease 2 | chr1:18368405-18375336 REVERSE LENGTH=1080
AT1G49650.1	| Symbols: | alpha/beta-Hydrolases superfamily protein | chr1:18377363-18378487 REVERSE LENGTH=374
AT1G49660.1	| Symbols: AtCXE5, CXE5 | carboxyesterase 5 | chr1:18378777-18379736 REVERSE LENGTH=319
AT1G49740.1	| Symbols: | PLC-like phosphodiesterases superfamily protein | chr1:18407728-18409468 FORWARD LENGTH=359													6	6	6	6	3	3	3	3	3	3	3	3
AT1G49760.1	| Symbols: PAB8, PABP8 | poly(A) binding protein 8 | chr1:18416740-18419753 FORWARD LENGTH=671	3	4	4	4	6	7	6	6.34	4	4	4	4	6	7	7	7	6	6	6	6	5	5	5	5	6	8	8	8	4	4	4	4	4	4	4	4	17	19	16	17.25	17	19	18	18.57	13	16	14	14.9
AT1G49820.1	| Symbols: ATMTK, MTK | S-methyl-5-thioribose kinase | chr1:18443005-18444907 FORWARD LENGTH=420
AT1G49910.1	| Symbols: BUB3.2 | Transducin/WD40 repeat-like superfamily protein | chr1:18479025-18481271 FORWARD LENGTH=339													5	5	1	1.73	5	5	0	0.91	4	6	1	1.91
AT1G49970.1	| Symbols: CLPR1, NCLPP5, SVR2 | CLP protease proteolytic subunit 1 | chr1:18501936-18504462 REVERSE LENGTH=387
AT1G50010.1	| Symbols: TUA2 | tubulin alpha-2 chain | chr1:18517737-18519729 FORWARD LENGTH=450	7	8	0	1.49	20	27	0	6.43	28	46	1	12.34					2	2	0	0.5	25	36	2	10.23					4	4	0	1.01	4	4	0	0.71	2	2	0	0.5					2	2	0	0.21
AT1G50110.1	| Symbols: | D-aminoacid aminotransferase-like PLP-dependent enzymes superfamily protein | chr1:18558203-18560219 REVERSE LENGTH=356																																					3	3	3	3	2	4	4	4	10	16	16	16
AT1G50140.1	| Symbols: | P-loop containing nucleoside triphosphate hydrolases superfamily protein | chr1:18569921-18578663 REVERSE LENGTH=1003					2	2	1	1.57	2	2	2	2
AT1G50200.1	| Symbols: ALATS, ACD | Alanyl-tRNA synthetase | chr1:18591429-18598311 REVERSE LENGTH=1003					2	2	0	0.67	12	12	1	4.67
AT1G50200.2	| Symbols: ALATS | Alanyl-tRNA synthetase | chr1:18591429-18598167 REVERSE LENGTH=963					2	2	0	1.33	11	11	0	7.33
AT1G50320.1	| Symbols: ATHX, ATX, THX | thioredoxin X | chr1:18638606-18639464 REVERSE LENGTH=182																									4	5	5	5	5	11	11	11
AT1G50370.1	| Symbols: | Calcineurin-like metallo-phosphoesterase superfamily protein | chr1:18658894-18661672 FORWARD LENGTH=303
AT1G50380.1	| Symbols: | Prolyl oligopeptidase family protein | chr1:18662480-18666185 FORWARD LENGTH=710																																					14	16	16	16	14	16	16	16	38	52	52	52
AT1G50480.1	| Symbols: THFS | 10-formyltetrahydrofolate synthetase | chr1:18702064-18704687 FORWARD LENGTH=634					22	30	30	30	24	34	34	34
AT1G50500.1	| Symbols: HIT1, ATVPS53, VPS53 | Membrane trafficking VPS53 family protein | chr1:18708217-18715597 REVERSE LENGTH=828
AT1G50510.1	| Symbols: | indigoidine synthase A family protein | chr1:18716578-18719060 FORWARD LENGTH=330													11	12	12	12	9	10	10	10	12	15	15	15	8	8	8	8	8	9	9	9	2	2	2	2
AT1G50570.2	| Symbols: | Calcium-dependent lipid-binding (CaLB domain) family protein | chr1:18726400-18727566 REVERSE LENGTH=388
AT1G50600.1	| Symbols: SCL5 | scarecrow-like 5 | chr1:18737398-18739547 REVERSE LENGTH=597
AT1G50670.1	| Symbols: | OTU-like cysteine protease family protein | chr1:18775086-18776552 REVERSE LENGTH=208
AT1G50920.1	| Symbols: | Nucleolar GTP-binding protein | chr1:18870555-18872570 FORWARD LENGTH=671					6	6	6	6	8	8	8	8
AT1G50940.1	| Symbols: ETFALPHA | electron transfer flavoprotein alpha | chr1:18878038-18879939 REVERSE LENGTH=363
AT1G51100.1	| Symbols: | unknown protein; FUNCTIONS IN: molecular_function unknown; INVOLVED IN: biological_process unknown; LOCATED IN: chloroplast, chloroplast stroma; EXPRESSED IN: 22 plant structures; EXPRESSED DURING: 13 growth stages; Has 26 Blast hits t													7	7	7	7	6	6	6	6	4	4	4	4
AT1G51360.1	| Symbols: ATDABB1, DABB1 | dimeric A/B barrel domainS-protein 1 | chr1:19044208-19044840 FORWARD LENGTH=210
AT1G51390.1	| Symbols: NFU5, ATNFU1 | NFU domain protein 5 | chr1:19050427-19051753 FORWARD LENGTH=275
AT1G51420.1	| Symbols: ATSPP1, SPP1 | sucrose-phosphatase 1 | chr1:19064852-19066704 REVERSE LENGTH=423																									2	3	0	0.18	3	5	0	0.29	3	6	0	0.35	2	2	0	0.12	2	2	0	0.12
AT1G51510.1	| Symbols: Y14 | RNA-binding (RRM/RBD/RNP motifs) family protein | chr1:19103072-19104753 REVERSE LENGTH=202
AT1G51560.1	| Symbols: | Pyridoxamine 5'-phosphate oxidase family protein | chr1:19119900-19121859 REVERSE LENGTH=392
AT1G51570.1	| Symbols: | Calcium-dependent lipid-binding (CaLB domain) plant phosphoribosyltransferase family protein | chr1:19122358-19124688 REVERSE LENGTH=776													4	4	2	2.89	3	3	2	2.44	3	3	2	2.44
AT1G51630.1	| Symbols: | O-fucosyltransferase family protein | chr1:19142141-19144082 REVERSE LENGTH=423													3	4	3	3.8					2	2	2	2
AT1G51680.3	| Symbols: 4CL1, 4CL.1, AT4CL1 | 4-coumarate:CoA ligase 1 | chr1:19159080-19161464 REVERSE LENGTH=539
AT1G51690.1	| Symbols: ATB ALPHA, B ALPHA | protein phosphatase 2A 55 kDa regulatory subunit B alpha isoform | chr1:19166218-19169974 FORWARD LENGTH=513
[truncated: 3,110 more rows]
[truncated: 72 more columns]

## Sheet: Prot F0
AGI	Description	Name	MW	pI	Fraction	Profile	WSC
							0	50	100	150	200	250	300	350	400	1000
[truncated: 1,045 more rows]

## Sheet: Prot F50
AGI	Description	Name	MW	pI	Fraction	Profile	WSC
[truncated: 669 more rows]

[truncated: 8 more sheets: Prot F100, Prot F150, Prot F200, Prot F250, Prot F300, Prot F350, Prot F400, Prot F1000]
