# Supplementary material for: Development of a metalloproteomic approach to analyse the response of Arabidopsis cells to uranium stress
Source: Royal Society of Chemistry journal article supplement (doi:10.1039/d0mt00092b), 2020-05-27
Supplement: d0mt00092b2.xlsx [file d0mt00092b2.xlsx]

## Sheet: Read me
	Table S2: Proteins identified by MS/MS in F100 from U-stressed and control Arabidopsis cells
	Spreadsheet 'Peptides'
	Missed cleavages: number of missed cleavage
	Modifications: modification(s) found, if any
	Acetyl (Protein N-term), Dimethyl (KR), Methyl (KR), Oxidation (M): number of modification(s) identified
	Modified sequence
	Dimethyl (KR), Methyl(KR), Oxidation (M) Probabilities
	Dimethyl (KR), Methyl(KR), Oxidation (M) Score Diffs
	Leading razor protein
	Gene names
	Protein names
	Experiment: peptide found in control (U0) or U-treated (U50) protein samples
	Score and intensity from MaxQuant (Andromeda search engine)
	Spreadsheet 'Proteins'
	Majority protein IDs
	Protein names
	Gene names
	Razor + unique peptides
	Fasta headers
	Unique + razor sequence coverage [%]
	Mol. weight [kDa]
	Sequence length
	Intensity U50; Intensity U0; Ratio U50/U0: peptide intensities in U0 and U50 samples, a,d the corresponding U50/U0 ratio
	Spreadsheets 'Dimethyl(KR)' and 'Methy(KR)'
	Dimethyl (KR) or Methyl(KR) Probabilities
	Amino acid: methylated residue (R or K)
	Number of Dimethyl (KR) or Methyl(KR)
	Leading proteins
	Protein names
	Gene names
	Mol. weight [kDa]
	Fasta headers
	Score
	Position in peptide
	Intensity U50; Intensity U0; Ratio U50/U0
	Spreadsheet 'Arg-methylated proteins'
	Arg-methylated proteins extracted from sheets 'Dimethyl(KR)' and 'Methy(KR)'
	Spreadsheet 'Best candidates'
	Candidates extracted from sheet 'Arg-methylated proteins' using protein molecular mass (<20 kDa) and intensity ratio U50/U0 as criteria

## Sheet: Peptides
Sequence	Missed cleavages	Modifications	Acetyl (Protein N-term)	Dimethyl (KR)	Methyl (KR)	Oxidation (M)	Modified sequence	Dimethyl (KR) Probabilities	Methyl (KR) Probabilities	Oxidation (M) Probabilities	Dimethyl (KR) Score Diffs	Methyl (KR) Score Diffs	Oxidation (M) Score Diffs	Leading razor protein	Gene names	Protein names	Experiment	Score	Intensity
ATDNQLYVATCSPAR	0	Unmodified					_ATDNQLYVATCSPAR_							A0A097PL68	NLP3	Omega-amidase,chloroplastic	U0	162.68	5509300
GDLYQLVDVQR	0	Unmodified					_GDLYQLVDVQR_							A0A097PL68	NLP3	Omega-amidase,chloroplastic	U0	66.435	1716900
TLTAGETPTIVDTDVGR	0	Unmodified					_TLTAGETPTIVDTDVGR_							A0A097PL68	NLP3	Omega-amidase,chloroplastic	U0	121.28	8447800
TLTAGETPTIVDTDVGR	0	Unmodified					_TLTAGETPTIVDTDVGR_							A0A097PL68	NLP3	Omega-amidase,chloroplastic	U50	NaN	4519700
TSLPLNR	0	Unmodified					_TSLPLNR_							A0A097PL68	NLP3	Omega-amidase,chloroplastic	U50	114.54	5264700
VIVGADSLSTELK	0	Unmodified					_VIVGADSLSTELK_							A0A097PMS4	At5g66530		U0	126.39	6397100
VIVGADSLSTELK	0	Unmodified					_VIVGADSLSTELK_							A0A097PMS4	At5g66530		U50	86.344	3519400
ISSCQFRR	1	Methyl (KR)			1		_ISSCQFR(me)R_		ISSCQFR(0.982)R(0.018)			ISSCQFR(17.42)R(-17.42)		A0A0G4NSG5	ZHD13	Zinc-finger homeodomain protein 13	U0	63.301	6894800
ISSCQFRR	1	Methyl (KR)			1		_ISSCQFR(me)R_							A0A0G4NSG5	ZHD13	Zinc-finger homeodomain protein 13	U50	NaN	5669900
MSFQSFNPSIEK	0	Unmodified					_MSFQSFNPSIEK_							A0A178U7K6	At5g59460		U0	107.55
QSEVVSEEQNRPNKSPR	2	Unmodified					_QSEVVSEEQNRPNKSPR_							A0A178U7K6	At5g59460		U0	168.05	4736000
QSEVVSEEQNRPNKSPR	2	Unmodified					_QSEVVSEEQNRPNKSPR_							A0A178U7K6	At5g59460		U0	103.61	1017000
QSEVVSEEQNRPNKSPR	2	Unmodified					_QSEVVSEEQNRPNKSPR_							A0A178U7K6	At5g59460		U50	29.973	1558600
QSEVVSEEQNRPNKSPR	2	Unmodified					_QSEVVSEEQNRPNKSPR_							A0A178U7K6	At5g59460		U50	NaN	402440
AGHIEDVVVDSR	0	Unmodified					_AGHIEDVVVDSR_							A0A178U7Q6	GNA1	Glucosamine 6-phosphate N-acetyltransferase	U0	56.205	6862800
AGHIEDVVVDSR	0	Unmodified					_AGHIEDVVVDSR_							A0A178U7Q6	GNA1	Glucosamine 6-phosphate N-acetyltransferase	U50	75.695	10161000
LVEMGFGDAQVR	0	Unmodified					_LVEMGFGDAQVR_							A0A178U7V3	UBC27	Ubiquitin-conjugating enzyme E2 27	U0	119.75	2472800
SGIWADSLSR	0	Unmodified					_SGIWADSLSR_							A0A178U7V7	EPSIN1	Clathrin interactor EPSIN 1	U50	90.15
KGGTEHLGLPVFNSVAEAK	1	Unmodified					_KGGTEHLGLPVFNSVAEAK_							A0A178U834		Succinyl-CoA ligase [ADP-forming] subunit alpha-1, mitochondrial	U0	55.031	4111300
KGGTEHLGLPVFNSVAEAK	1	Unmodified					_KGGTEHLGLPVFNSVAEAK_							A0A178U834		Succinyl-CoA ligase [ADP-forming] subunit alpha-1, mitochondrial	U50	50.87	5094100
KGGTEHLGLPVFNSVAEAK	1	Unmodified					_KGGTEHLGLPVFNSVAEAK_							A0A178U834		Succinyl-CoA ligase [ADP-forming] subunit alpha-1, mitochondrial	U50	61.139	5510500
ANAASGMAVHDDCK	0	Acetyl (Protein N-term),Oxidation (M)	1			1	_(ac)ANAASGM(ox)AVHDDCK_			ANAASGM(1)AVHDDCK			ANAASGM(194.29)AVHDDCK	A0A178U8Q4	ADF1;ADF4;ADF2;ADF3	Actin-depolymerizing factor 1;Actin-depolymerizing factor 4;Actin-depolymerizing factor 2;Actin-depolymerizing factor 3	U0	194.29	635310000
ANAASGMAVHDDCK	0	Acetyl (Protein N-term),Oxidation (M)	1			1	_(ac)ANAASGM(ox)AVHDDCK_			ANAASGM(1)AVHDDCK			ANAASGM(74.85)AVHDDCK	A0A178U8Q4	ADF1;ADF4;ADF2;ADF3	Actin-depolymerizing factor 1;Actin-depolymerizing factor 4;Actin-depolymerizing factor 2;Actin-depolymerizing factor 3	U0	74.853	23715000
ANAASGMAVHDDCK	0	Acetyl (Protein N-term),Oxidation (M)	1			1	_(ac)ANAASGM(ox)AVHDDCK_			ANAASGM(1)AVHDDCK			ANAASGM(105.36)AVHDDCK	A0A178U8Q4	ADF1;ADF4;ADF2;ADF3	Actin-depolymerizing factor 1;Actin-depolymerizing factor 4;Actin-depolymerizing factor 2;Actin-depolymerizing factor 3	U0	105.36	13268000
ANAASGMAVHDDCK	0	Acetyl (Protein N-term),Oxidation (M)	1			1	_(ac)ANAASGM(ox)AVHDDCK_			ANAASGM(1)AVHDDCK			ANAASGM(147.37)AVHDDCK	A0A178U8Q4	ADF1;ADF4;ADF2;ADF3	Actin-depolymerizing factor 1;Actin-depolymerizing factor 4;Actin-depolymerizing factor 2;Actin-depolymerizing factor 3	U0	147.37	29579000
ANAASGMAVHDDCK	0	Acetyl (Protein N-term),Oxidation (M),Methyl (KR)	1		1	1	_(ac)ANAASGM(ox)AVHDDCK(me)_		ANAASGMAVHDDCK(1)	ANAASGM(1)AVHDDCK		ANAASGMAVHDDCK(137.95)	ANAASGM(137.95)AVHDDCK	A0A178U8Q4	ADF1;ADF4;ADF2;ADF3	Actin-depolymerizing factor 1;Actin-depolymerizing factor 4;Actin-depolymerizing factor 2;Actin-depolymerizing factor 3	U0	137.95	30665000
ANAASGMAVHDDCK	0	Acetyl (Protein N-term)	1				_(ac)ANAASGMAVHDDCK_							A0A178U8Q4	ADF1;ADF4;ADF2;ADF3	Actin-depolymerizing factor 1;Actin-depolymerizing factor 4;Actin-depolymerizing factor 2;Actin-depolymerizing factor 3	U0	153.54	6390700
ANAASGMAVHDDCK	0	Acetyl (Protein N-term)	1				_(ac)ANAASGMAVHDDCK_							A0A178U8Q4	ADF1;ADF4;ADF2;ADF3	Actin-depolymerizing factor 1;Actin-depolymerizing factor 4;Actin-depolymerizing factor 2;Actin-depolymerizing factor 3	U0	231.32	3305700000
ANAASGMAVHDDCK	0	Acetyl (Protein N-term)	1				_(ac)ANAASGMAVHDDCK_							A0A178U8Q4	ADF1;ADF4;ADF2;ADF3	Actin-depolymerizing factor 1;Actin-depolymerizing factor 4;Actin-depolymerizing factor 2;Actin-depolymerizing factor 3	U0	81.619	77283000
ANAASGMAVHDDCK	0	Acetyl (Protein N-term)	1				_(ac)ANAASGMAVHDDCK_							A0A178U8Q4	ADF1;ADF4;ADF2;ADF3	Actin-depolymerizing factor 1;Actin-depolymerizing factor 4;Actin-depolymerizing factor 2;Actin-depolymerizing factor 3	U0	NaN	4282300
ANAASGMAVHDDCK	0	Acetyl (Protein N-term),Methyl (KR)	1		1		_(ac)ANAASGMAVHDDCK(me)_		ANAASGMAVHDDCK(1)			ANAASGMAVHDDCK(179.67)		A0A178U8Q4	ADF1;ADF4;ADF2;ADF3	Actin-depolymerizing factor 1;Actin-depolymerizing factor 4;Actin-depolymerizing factor 2;Actin-depolymerizing factor 3	U0	179.67	124830000
ANAASGMAVHDDCK	0	Acetyl (Protein N-term),Oxidation (M)	1			1	_(ac)ANAASGM(ox)AVHDDCK_			ANAASGM(1)AVHDDCK			ANAASGM(194.29)AVHDDCK	A0A178U8Q4	ADF1;ADF4;ADF2;ADF3	Actin-depolymerizing factor 1;Actin-depolymerizing factor 4;Actin-depolymerizing factor 2;Actin-depolymerizing factor 3	U50	194.29	767580000
ANAASGMAVHDDCK	0	Acetyl (Protein N-term),Oxidation (M)	1			1	_(ac)ANAASGM(ox)AVHDDCK_			ANAASGM(1)AVHDDCK			ANAASGM(87.86)AVHDDCK	A0A178U8Q4	ADF1;ADF4;ADF2;ADF3	Actin-depolymerizing factor 1;Actin-depolymerizing factor 4;Actin-depolymerizing factor 2;Actin-depolymerizing factor 3	U50	87.863	26534000
ANAASGMAVHDDCK	0	Acetyl (Protein N-term),Oxidation (M)	1			1	_(ac)ANAASGM(ox)AVHDDCK_			ANAASGM(1)AVHDDCK			ANAASGM(148.1)AVHDDCK	A0A178U8Q4	ADF1;ADF4;ADF2;ADF3	Actin-depolymerizing factor 1;Actin-depolymerizing factor 4;Actin-depolymerizing factor 2;Actin-depolymerizing factor 3	U50	148.1	13784000
ANAASGMAVHDDCK	0	Acetyl (Protein N-term),Oxidation (M)	1			1	_(ac)ANAASGM(ox)AVHDDCK_			ANAASGM(1)AVHDDCK			ANAASGM(138.76)AVHDDCK	A0A178U8Q4	ADF1;ADF4;ADF2;ADF3	Actin-depolymerizing factor 1;Actin-depolymerizing factor 4;Actin-depolymerizing factor 2;Actin-depolymerizing factor 3	U50	138.76	32121000
ANAASGMAVHDDCK	0	Acetyl (Protein N-term),Oxidation (M),Methyl (KR)	1		1	1	_(ac)ANAASGM(ox)AVHDDCK(me)_		ANAASGMAVHDDCK(1)	ANAASGM(1)AVHDDCK		ANAASGMAVHDDCK(149.02)	ANAASGM(149.02)AVHDDCK	A0A178U8Q4	ADF1;ADF4;ADF2;ADF3	Actin-depolymerizing factor 1;Actin-depolymerizing factor 4;Actin-depolymerizing factor 2;Actin-depolymerizing factor 3	U50	149.02	18237000
ANAASGMAVHDDCK	0	Acetyl (Protein N-term)	1				_(ac)ANAASGMAVHDDCK_							A0A178U8Q4	ADF1;ADF4;ADF2;ADF3	Actin-depolymerizing factor 1;Actin-depolymerizing factor 4;Actin-depolymerizing factor 2;Actin-depolymerizing factor 3	U50	95.66	90722000
ANAASGMAVHDDCK	0	Acetyl (Protein N-term)	1				_(ac)ANAASGMAVHDDCK_							A0A178U8Q4	ADF1;ADF4;ADF2;ADF3	Actin-depolymerizing factor 1;Actin-depolymerizing factor 4;Actin-depolymerizing factor 2;Actin-depolymerizing factor 3	U50	231.74
ANAASGMAVHDDCK	0	Acetyl (Protein N-term)	1				_(ac)ANAASGMAVHDDCK_							A0A178U8Q4	ADF1;ADF4;ADF2;ADF3	Actin-depolymerizing factor 1;Actin-depolymerizing factor 4;Actin-depolymerizing factor 2;Actin-depolymerizing factor 3	U50	177.64
ANAASGMAVHDDCK	0	Acetyl (Protein N-term)	1				_(ac)ANAASGMAVHDDCK_							A0A178U8Q4	ADF1;ADF4;ADF2;ADF3	Actin-depolymerizing factor 1;Actin-depolymerizing factor 4;Actin-depolymerizing factor 2;Actin-depolymerizing factor 3	U50	183.94
ANAASGMAVHDDCK	0	Acetyl (Protein N-term)	1				_(ac)ANAASGMAVHDDCK_							A0A178U8Q4	ADF1;ADF4;ADF2;ADF3	Actin-depolymerizing factor 1;Actin-depolymerizing factor 4;Actin-depolymerizing factor 2;Actin-depolymerizing factor 3	U50	155.88
ANAASGMAVHDDCK	0	Acetyl (Protein N-term)	1				_(ac)ANAASGMAVHDDCK_							A0A178U8Q4	ADF1;ADF4;ADF2;ADF3	Actin-depolymerizing factor 1;Actin-depolymerizing factor 4;Actin-depolymerizing factor 2;Actin-depolymerizing factor 3	U50	99.985	6159600
ANAASGMAVHDDCK	0	Acetyl (Protein N-term)	1				_(ac)ANAASGMAVHDDCK_							A0A178U8Q4	ADF1;ADF4;ADF2;ADF3	Actin-depolymerizing factor 1;Actin-depolymerizing factor 4;Actin-depolymerizing factor 2;Actin-depolymerizing factor 3	U50	54.343	4953200
ANAASGMAVHDDCK	0	Acetyl (Protein N-term),Methyl (KR)	1		1		_(ac)ANAASGMAVHDDCK(me)_		ANAASGMAVHDDCK(1)			ANAASGMAVHDDCK(174.29)		A0A178U8Q4	ADF1;ADF4;ADF2;ADF3	Actin-depolymerizing factor 1;Actin-depolymerizing factor 4;Actin-depolymerizing factor 2;Actin-depolymerizing factor 3	U50	174.29	63667000
ANAASGMAVHDDCKLK	1	Unmodified					_ANAASGMAVHDDCKLK_							A0A178U8Q4	ADF2;ADF3	Actin-depolymerizing factor 2;Actin-depolymerizing factor 3	U0	39.91	17590000
ANAASGMAVHDDCKLK	1	Unmodified					_ANAASGMAVHDDCKLK_							A0A178U8Q4	ADF2;ADF3	Actin-depolymerizing factor 2;Actin-depolymerizing factor 3	U0	77.1	13963000
ANAASGMAVHDDCKLK	1	Acetyl (Protein N-term),Oxidation (M)	1			1	_(ac)ANAASGM(ox)AVHDDCKLK_			ANAASGM(1)AVHDDCKLK			ANAASGM(123.42)AVHDDCKLK	A0A178U8Q4	ADF2;ADF3	Actin-depolymerizing factor 2;Actin-depolymerizing factor 3	U0	123.42	6114300000
ANAASGMAVHDDCKLK	1	Acetyl (Protein N-term),Oxidation (M)	1			1	_(ac)ANAASGM(ox)AVHDDCKLK_			ANAASGM(1)AVHDDCKLK			ANAASGM(176)AVHDDCKLK	A0A178U8Q4	ADF2;ADF3	Actin-depolymerizing factor 2;Actin-depolymerizing factor 3	U0	176	226450000
ANAASGMAVHDDCKLK	1	Acetyl (Protein N-term),Oxidation (M)	1			1	_(ac)ANAASGM(ox)AVHDDCKLK_			ANAASGM(1)AVHDDCKLK			ANAASGM(102.87)AVHDDCKLK	A0A178U8Q4	ADF2;ADF3	Actin-depolymerizing factor 2;Actin-depolymerizing factor 3	U0	102.87	2973000
ANAASGMAVHDDCKLK	1	Acetyl (Protein N-term),Oxidation (M)	1			1	_(ac)ANAASGM(ox)AVHDDCKLK_			ANAASGM(1)AVHDDCKLK			ANAASGM(87.14)AVHDDCKLK	A0A178U8Q4	ADF2;ADF3	Actin-depolymerizing factor 2;Actin-depolymerizing factor 3	U0	87.138	75415000
ANAASGMAVHDDCKLK	1	Acetyl (Protein N-term),Oxidation (M)	1			1	_(ac)ANAASGM(ox)AVHDDCKLK_			ANAASGM(1)AVHDDCKLK			ANAASGM(85.67)AVHDDCKLK	A0A178U8Q4	ADF2;ADF3	Actin-depolymerizing factor 2;Actin-depolymerizing factor 3	U0	85.672	2944200
ANAASGMAVHDDCKLK	1	Acetyl (Protein N-term),Oxidation (M)	1			1	_(ac)ANAASGM(ox)AVHDDCKLK_			ANAASGM(1)AVHDDCKLK			ANAASGM(122.86)AVHDDCKLK	A0A178U8Q4	ADF2;ADF3	Actin-depolymerizing factor 2;Actin-depolymerizing factor 3	U0	122.86	102140000
ANAASGMAVHDDCKLK	1	Acetyl (Protein N-term),Oxidation (M)	1			1	_(ac)ANAASGM(ox)AVHDDCKLK_			ANAASGM(1)AVHDDCKLK			ANAASGM(42.91)AVHDDCKLK	A0A178U8Q4	ADF2;ADF3	Actin-depolymerizing factor 2;Actin-depolymerizing factor 3	U0	42.913	80796000
ANAASGMAVHDDCKLK	1	Acetyl (Protein N-term),Oxidation (M)	1			1	_(ac)ANAASGM(ox)AVHDDCKLK_							A0A178U8Q4	ADF2;ADF3	Actin-depolymerizing factor 2;Actin-depolymerizing factor 3	U0	NaN	1438300
ANAASGMAVHDDCKLK	1	Acetyl (Protein N-term),Oxidation (M),Methyl (KR)	1		1	1	_(ac)ANAASGM(ox)AVHDDCK(me)LK_		ANAASGMAVHDDCK(0.988)LK(0.012)	ANAASGM(1)AVHDDCKLK		ANAASGMAVHDDCK(19.21)LK(-19.21)	ANAASGM(132.97)AVHDDCKLK	A0A178U8Q4	ADF2;ADF3	Actin-depolymerizing factor 2;Actin-depolymerizing factor 3	U0	132.97	6468300
ANAASGMAVHDDCKLK	1	Acetyl (Protein N-term),Oxidation (M),Methyl (KR)	1		1	1	_(ac)ANAASGM(ox)AVHDDCK(me)LK_		ANAASGMAVHDDCK(0.776)LK(0.224)	ANAASGM(1)AVHDDCKLK		ANAASGMAVHDDCK(5.4)LK(-5.4)	ANAASGM(48.22)AVHDDCKLK	A0A178U8Q4	ADF2;ADF3	Actin-depolymerizing factor 2;Actin-depolymerizing factor 3	U0	48.216	4570700
ANAASGMAVHDDCKLK	1	Acetyl (Protein N-term),Oxidation (M),Methyl (KR)	1		1	1	_(ac)ANAASGM(ox)AVHDDCK(me)LK_		ANAASGMAVHDDCK(0.84)LK(0.16)	ANAASGM(1)AVHDDCKLK		ANAASGMAVHDDCK(7.2)LK(-7.2)	ANAASGM(84.05)AVHDDCKLK	A0A178U8Q4	ADF2;ADF3	Actin-depolymerizing factor 2;Actin-depolymerizing factor 3	U0	84.046	169800000
ANAASGMAVHDDCKLK	1	Acetyl (Protein N-term)	1				_(ac)ANAASGMAVHDDCKLK_							A0A178U8Q4	ADF2;ADF3	Actin-depolymerizing factor 2;Actin-depolymerizing factor 3	U0	102.15	19698000000
ANAASGMAVHDDCKLK	1	Acetyl (Protein N-term)	1				_(ac)ANAASGMAVHDDCKLK_							A0A178U8Q4	ADF2;ADF3	Actin-depolymerizing factor 2;Actin-depolymerizing factor 3	U0	211.77	1212200000
ANAASGMAVHDDCKLK	1	Acetyl (Protein N-term)	1				_(ac)ANAASGMAVHDDCKLK_							A0A178U8Q4	ADF2;ADF3	Actin-depolymerizing factor 2;Actin-depolymerizing factor 3	U0	225.32	9071200
ANAASGMAVHDDCKLK	1	Acetyl (Protein N-term)	1				_(ac)ANAASGMAVHDDCKLK_							A0A178U8Q4	ADF2;ADF3	Actin-depolymerizing factor 2;Actin-depolymerizing factor 3	U0	102.15	371010000
ANAASGMAVHDDCKLK	1	Acetyl (Protein N-term)	1				_(ac)ANAASGMAVHDDCKLK_							A0A178U8Q4	ADF2;ADF3	Actin-depolymerizing factor 2;Actin-depolymerizing factor 3	U0	81.428	18388000
ANAASGMAVHDDCKLK	1	Acetyl (Protein N-term)	1				_(ac)ANAASGMAVHDDCKLK_							A0A178U8Q4	ADF2;ADF3	Actin-depolymerizing factor 2;Actin-depolymerizing factor 3	U0	85.469	10500000
ANAASGMAVHDDCKLK	1	Acetyl (Protein N-term)	1				_(ac)ANAASGMAVHDDCKLK_							A0A178U8Q4	ADF2;ADF3	Actin-depolymerizing factor 2;Actin-depolymerizing factor 3	U0	65.467	7233800
ANAASGMAVHDDCKLK	1	Acetyl (Protein N-term)	1				_(ac)ANAASGMAVHDDCKLK_							A0A178U8Q4	ADF2;ADF3	Actin-depolymerizing factor 2;Actin-depolymerizing factor 3	U0	70.197	4202200
ANAASGMAVHDDCKLK	1	Acetyl (Protein N-term)	1				_(ac)ANAASGMAVHDDCKLK_							A0A178U8Q4	ADF2;ADF3	Actin-depolymerizing factor 2;Actin-depolymerizing factor 3	U0	71.98	5241000
ANAASGMAVHDDCKLK	1	Acetyl (Protein N-term)	1				_(ac)ANAASGMAVHDDCKLK_							A0A178U8Q4	ADF2;ADF3	Actin-depolymerizing factor 2;Actin-depolymerizing factor 3	U0	53.565	2262100
ANAASGMAVHDDCKLK	1	Acetyl (Protein N-term)	1				_(ac)ANAASGMAVHDDCKLK_							A0A178U8Q4	ADF2;ADF3	Actin-depolymerizing factor 2;Actin-depolymerizing factor 3	U0	58.671
ANAASGMAVHDDCKLK	1	Acetyl (Protein N-term),Methyl (KR)	1		1		_(ac)ANAASGMAVHDDCK(me)LK_		ANAASGMAVHDDCK(0.863)LK(0.137)			ANAASGMAVHDDCK(8.01)LK(-8.01)		A0A178U8Q4	ADF2;ADF3	Actin-depolymerizing factor 2;Actin-depolymerizing factor 3	U0	110.38	875370000
ANAASGMAVHDDCKLK	1	Acetyl (Protein N-term),Methyl (KR)	1		1		_(ac)ANAASGMAVHDDCK(me)LK_		ANAASGMAVHDDCK(0.999)LK(0.001)			ANAASGMAVHDDCK(28.39)LK(-28.39)		A0A178U8Q4	ADF2;ADF3	Actin-depolymerizing factor 2;Actin-depolymerizing factor 3	U0	235.81	37106000
ANAASGMAVHDDCKLK	1	Unmodified					_ANAASGMAVHDDCKLK_							A0A178U8Q4	ADF2;ADF3	Actin-depolymerizing factor 2;Actin-depolymerizing factor 3	U50	92.952	28718000
ANAASGMAVHDDCKLK	1	Unmodified					_ANAASGMAVHDDCKLK_							A0A178U8Q4	ADF2;ADF3	Actin-depolymerizing factor 2;Actin-depolymerizing factor 3	U50	78.71	27315000
ANAASGMAVHDDCKLK	1	Acetyl (Protein N-term),Oxidation (M)	1			1	_(ac)ANAASGM(ox)AVHDDCKLK_			ANAASGM(1)AVHDDCKLK			ANAASGM(107.82)AVHDDCKLK	A0A178U8Q4	ADF2;ADF3	Actin-depolymerizing factor 2;Actin-depolymerizing factor 3	U50	107.82	9905300000
ANAASGMAVHDDCKLK	1	Acetyl (Protein N-term),Oxidation (M)	1			1	_(ac)ANAASGM(ox)AVHDDCKLK_			ANAASGM(1)AVHDDCKLK			ANAASGM(164.98)AVHDDCKLK	A0A178U8Q4	ADF2;ADF3	Actin-depolymerizing factor 2;Actin-depolymerizing factor 3	U50	164.98	402480000
ANAASGMAVHDDCKLK	1	Acetyl (Protein N-term),Oxidation (M)	1			1	_(ac)ANAASGM(ox)AVHDDCKLK_			ANAASGM(1)AVHDDCKLK			ANAASGM(109.48)AVHDDCKLK	A0A178U8Q4	ADF2;ADF3	Actin-depolymerizing factor 2;Actin-depolymerizing factor 3	U50	109.48	97236000
ANAASGMAVHDDCKLK	1	Acetyl (Protein N-term),Oxidation (M)	1			1	_(ac)ANAASGM(ox)AVHDDCKLK_			ANAASGM(1)AVHDDCKLK			ANAASGM(100.38)AVHDDCKLK	A0A178U8Q4	ADF2;ADF3	Actin-depolymerizing factor 2;Actin-depolymerizing factor 3	U50	100.38	3775100
ANAASGMAVHDDCKLK	1	Acetyl (Protein N-term),Oxidation (M)	1			1	_(ac)ANAASGM(ox)AVHDDCKLK_			ANAASGM(1)AVHDDCKLK			ANAASGM(90.56)AVHDDCKLK	A0A178U8Q4	ADF2;ADF3	Actin-depolymerizing factor 2;Actin-depolymerizing factor 3	U50	90.561	80957000
ANAASGMAVHDDCKLK	1	Acetyl (Protein N-term),Oxidation (M)	1			1	_(ac)ANAASGM(ox)AVHDDCKLK_			ANAASGM(1)AVHDDCKLK			ANAASGM(91.36)AVHDDCKLK	A0A178U8Q4	ADF2;ADF3	Actin-depolymerizing factor 2;Actin-depolymerizing factor 3	U50	91.355	17993000
ANAASGMAVHDDCKLK	1	Acetyl (Protein N-term),Oxidation (M)	1			1	_(ac)ANAASGM(ox)AVHDDCKLK_			ANAASGM(1)AVHDDCKLK			ANAASGM(66.98)AVHDDCKLK	A0A178U8Q4	ADF2;ADF3	Actin-depolymerizing factor 2;Actin-depolymerizing factor 3	U50	66.982	111830000
ANAASGMAVHDDCKLK	1	Acetyl (Protein N-term),Oxidation (M)	1			1	_(ac)ANAASGM(ox)AVHDDCKLK_			ANAASGM(1)AVHDDCKLK			ANAASGM(153.54)AVHDDCKLK	A0A178U8Q4	ADF2;ADF3	Actin-depolymerizing factor 2;Actin-depolymerizing factor 3	U50	153.54	139150000
ANAASGMAVHDDCKLK	1	Acetyl (Protein N-term),Oxidation (M)	1			1	_(ac)ANAASGM(ox)AVHDDCKLK_			ANAASGM(1)AVHDDCKLK			ANAASGM(119.17)AVHDDCKLK	A0A178U8Q4	ADF2;ADF3	Actin-depolymerizing factor 2;Actin-depolymerizing factor 3	U50	119.17
ANAASGMAVHDDCKLK	1	Acetyl (Protein N-term),Oxidation (M)	1			1	_(ac)ANAASGM(ox)AVHDDCKLK_			ANAASGM(1)AVHDDCKLK			ANAASGM(58.82)AVHDDCKLK	A0A178U8Q4	ADF2;ADF3	Actin-depolymerizing factor 2;Actin-depolymerizing factor 3	U50	58.824
ANAASGMAVHDDCKLK	1	Acetyl (Protein N-term),Oxidation (M)	1			1	_(ac)ANAASGM(ox)AVHDDCKLK_			ANAASGM(1)AVHDDCKLK			ANAASGM(46.89)AVHDDCKLK	A0A178U8Q4	ADF2;ADF3	Actin-depolymerizing factor 2;Actin-depolymerizing factor 3	U50	46.89	2474400
ANAASGMAVHDDCKLK	1	Acetyl (Protein N-term),Oxidation (M),Methyl (KR)	1		1	1	_(ac)ANAASGM(ox)AVHDDCK(me)LK_							A0A178U8Q4	ADF2;ADF3	Actin-depolymerizing factor 2;Actin-depolymerizing factor 3	U50	NaN	3113800
ANAASGMAVHDDCKLK	1	Acetyl (Protein N-term),Oxidation (M),Methyl (KR)	1		1	1	_(ac)ANAASGM(ox)AVHDDCK(me)LK_							A0A178U8Q4	ADF2;ADF3	Actin-depolymerizing factor 2;Actin-depolymerizing factor 3	U50	NaN	175680000
ANAASGMAVHDDCKLK	1	Acetyl (Protein N-term)	1				_(ac)ANAASGMAVHDDCKLK_							A0A178U8Q4	ADF2;ADF3	Actin-depolymerizing factor 2;Actin-depolymerizing factor 3	U50	110.22	23550000000
ANAASGMAVHDDCKLK	1	Acetyl (Protein N-term)	1				_(ac)ANAASGMAVHDDCKLK_							A0A178U8Q4	ADF2;ADF3	Actin-depolymerizing factor 2;Actin-depolymerizing factor 3	U50	228.38	1656900000
ANAASGMAVHDDCKLK	1	Acetyl (Protein N-term)	1				_(ac)ANAASGMAVHDDCKLK_							A0A178U8Q4	ADF2;ADF3	Actin-depolymerizing factor 2;Actin-depolymerizing factor 3	U50	169.79	12814000
ANAASGMAVHDDCKLK	1	Acetyl (Protein N-term)	1				_(ac)ANAASGMAVHDDCKLK_							A0A178U8Q4	ADF2;ADF3	Actin-depolymerizing factor 2;Actin-depolymerizing factor 3	U50	91.657	23209000
ANAASGMAVHDDCKLK	1	Acetyl (Protein N-term)	1				_(ac)ANAASGMAVHDDCKLK_							A0A178U8Q4	ADF2;ADF3	Actin-depolymerizing factor 2;Actin-depolymerizing factor 3	U50	100.43	12275000
ANAASGMAVHDDCKLK	1	Acetyl (Protein N-term)	1				_(ac)ANAASGMAVHDDCKLK_							A0A178U8Q4	ADF2;ADF3	Actin-depolymerizing factor 2;Actin-depolymerizing factor 3	U50	60.489	8777500
ANAASGMAVHDDCKLK	1	Acetyl (Protein N-term)	1				_(ac)ANAASGMAVHDDCKLK_							A0A178U8Q4	ADF2;ADF3	Actin-depolymerizing factor 2;Actin-depolymerizing factor 3	U50	83.54
ANAASGMAVHDDCKLK	1	Acetyl (Protein N-term)	1				_(ac)ANAASGMAVHDDCKLK_							A0A178U8Q4	ADF2;ADF3	Actin-depolymerizing factor 2;Actin-depolymerizing factor 3	U50	98.421
ANAASGMAVHDDCKLK	1	Acetyl (Protein N-term)	1				_(ac)ANAASGMAVHDDCKLK_							A0A178U8Q4	ADF2;ADF3	Actin-depolymerizing factor 2;Actin-depolymerizing factor 3	U50	53.395
ANAASGMAVHDDCKLK	1	Acetyl (Protein N-term)	1				_(ac)ANAASGMAVHDDCKLK_							A0A178U8Q4	ADF2;ADF3	Actin-depolymerizing factor 2;Actin-depolymerizing factor 3	U50	79.346
ANAASGMAVHDDCKLK	1	Acetyl (Protein N-term)	1				_(ac)ANAASGMAVHDDCKLK_							A0A178U8Q4	ADF2;ADF3	Actin-depolymerizing factor 2;Actin-depolymerizing factor 3	U50	44.998
ANAASGMAVHDDCKLK	1	Acetyl (Protein N-term)	1				_(ac)ANAASGMAVHDDCKLK_							A0A178U8Q4	ADF2;ADF3	Actin-depolymerizing factor 2;Actin-depolymerizing factor 3	U50	62.646
ANAASGMAVHDDCKLK	1	Acetyl (Protein N-term)	1				_(ac)ANAASGMAVHDDCKLK_							A0A178U8Q4	ADF2;ADF3	Actin-depolymerizing factor 2;Actin-depolymerizing factor 3	U50	66.738
ANAASGMAVHDDCKLK	1	Acetyl (Protein N-term)	1				_(ac)ANAASGMAVHDDCKLK_							A0A178U8Q4	ADF2;ADF3	Actin-depolymerizing factor 2;Actin-depolymerizing factor 3	U50	51.606
ANAASGMAVHDDCKLK	1	Acetyl (Protein N-term)	1				_(ac)ANAASGMAVHDDCKLK_							A0A178U8Q4	ADF2;ADF3	Actin-depolymerizing factor 2;Actin-depolymerizing factor 3	U50	48.391
ANAASGMAVHDDCKLK	1	Acetyl (Protein N-term)	1				_(ac)ANAASGMAVHDDCKLK_							A0A178U8Q4	ADF2;ADF3	Actin-depolymerizing factor 2;Actin-depolymerizing factor 3	U50	40.493
ANAASGMAVHDDCKLK	1	Acetyl (Protein N-term),Methyl (KR)	1		1		_(ac)ANAASGMAVHDDCKLK(me)_		ANAASGMAVHDDCK(0.4)LK(0.6)			ANAASGMAVHDDCK(-1.76)LK(1.76)		A0A178U8Q4	ADF2;ADF3	Actin-depolymerizing factor 2;Actin-depolymerizing factor 3	U50	107.07	575640000
ANAASGMAVHDDCKLK	1	Acetyl (Protein N-term),Methyl (KR)	1		1		_(ac)ANAASGMAVHDDCK(me)LK_		ANAASGMAVHDDCK(0.998)LK(0.002)			ANAASGMAVHDDCK(27.59)LK(-27.59)		A0A178U8Q4	ADF2;ADF3	Actin-depolymerizing factor 2;Actin-depolymerizing factor 3	U50	214.69	26223000
ANAASGMAVHDDCKLKFMELK	2	Acetyl (Protein N-term),2 Oxidation (M)	1			2	_(ac)ANAASGM(ox)AVHDDCKLKFM(ox)ELK_			ANAASGM(1)AVHDDCKLKFM(1)ELK			ANAASGM(94.67)AVHDDCKLKFM(94.67)ELK	A0A178U8Q4	ADF2;ADF3	Actin-depolymerizing factor 2;Actin-depolymerizing factor 3	U0	94.671	55919000
ANAASGMAVHDDCKLKFMELK	2	Acetyl (Protein N-term),2 Oxidation (M)	1			2	_(ac)ANAASGM(ox)AVHDDCKLKFM(ox)ELK_							A0A178U8Q4	ADF2;ADF3	Actin-depolymerizing factor 2;Actin-depolymerizing factor 3	U0	NaN	307090000
ANAASGMAVHDDCKLKFMELK	2	Acetyl (Protein N-term),Oxidation (M)	1			1	_(ac)ANAASGMAVHDDCKLKFM(ox)ELK_			ANAASGMAVHDDCKLKFM(1)ELK			ANAASGM(-74.45)AVHDDCKLKFM(74.45)ELK	A0A178U8Q4	ADF2;ADF3	Actin-depolymerizing factor 2;Actin-depolymerizing factor 3	U0	96.016	195450000
ANAASGMAVHDDCKLKFMELK	2	Acetyl (Protein N-term),Oxidation (M)	1			1	_(ac)ANAASGMAVHDDCKLKFM(ox)ELK_			ANAASGMAVHDDCKLKFM(1)ELK			ANAASGM(-51.71)AVHDDCKLKFM(51.71)ELK	A0A178U8Q4	ADF2;ADF3	Actin-depolymerizing factor 2;Actin-depolymerizing factor 3	U0	86.557	37642000
ANAASGMAVHDDCKLKFMELK	2	Acetyl (Protein N-term),Oxidation (M)	1			1	_(ac)ANAASGM(ox)AVHDDCKLKFMELK_			ANAASGM(1)AVHDDCKLKFMELK			ANAASGM(81.43)AVHDDCKLKFM(-81.43)ELK	A0A178U8Q4	ADF2;ADF3	Actin-depolymerizing factor 2;Actin-depolymerizing factor 3	U0	116.27	117580000
ANAASGMAVHDDCKLKFMELK	2	Acetyl (Protein N-term),Oxidation (M)	1			1	_(ac)ANAASGM(ox)AVHDDCKLKFMELK_			ANAASGM(1)AVHDDCKLKFMELK			ANAASGM(78.97)AVHDDCKLKFM(-78.97)ELK	A0A178U8Q4	ADF2;ADF3	Actin-depolymerizing factor 2;Actin-depolymerizing factor 3	U0	112.14	23436000
ANAASGMAVHDDCKLKFMELK	2	Acetyl (Protein N-term)	1				_(ac)ANAASGMAVHDDCKLKFMELK_							A0A178U8Q4	ADF2;ADF3	Actin-depolymerizing factor 2;Actin-depolymerizing factor 3	U0	112.32	14665000
ANAASGMAVHDDCKLKFMELK	2	Acetyl (Protein N-term)	1				_(ac)ANAASGMAVHDDCKLKFMELK_							A0A178U8Q4	ADF2;ADF3	Actin-depolymerizing factor 2;Actin-depolymerizing factor 3	U0	NaN	54012000
ANAASGMAVHDDCKLKFMELK	2	Acetyl (Protein N-term),2 Oxidation (M)	1			2	_(ac)ANAASGM(ox)AVHDDCKLKFM(ox)ELK_			ANAASGM(1)AVHDDCKLKFM(1)ELK			ANAASGM(101.89)AVHDDCKLKFM(101.89)ELK	A0A178U8Q4	ADF2;ADF3	Actin-depolymerizing factor 2;Actin-depolymerizing factor 3	U50	101.89	93875000
ANAASGMAVHDDCKLKFMELK	2	Acetyl (Protein N-term),2 Oxidation (M)	1			2	_(ac)ANAASGM(ox)AVHDDCKLKFM(ox)ELK_			ANAASGM(1)AVHDDCKLKFM(1)ELK			ANAASGM(80.99)AVHDDCKLKFM(80.99)ELK	A0A178U8Q4	ADF2;ADF3	Actin-depolymerizing factor 2;Actin-depolymerizing factor 3	U50	80.994	524800000
ANAASGMAVHDDCKLKFMELK	2	Acetyl (Protein N-term),2 Oxidation (M)	1			2	_(ac)ANAASGM(ox)AVHDDCKLKFM(ox)ELK_			ANAASGM(1)AVHDDCKLKFM(1)ELK			ANAASGM(70.9)AVHDDCKLKFM(70.9)ELK	A0A178U8Q4	ADF2;ADF3	Actin-depolymerizing factor 2;Actin-depolymerizing factor 3	U50	70.897	5853400
ANAASGMAVHDDCKLKFMELK	2	Acetyl (Protein N-term),Oxidation (M)	1			1	_(ac)ANAASGMAVHDDCKLKFM(ox)ELK_			ANAASGMAVHDDCKLKFM(1)ELK			ANAASGM(-64.43)AVHDDCKLKFM(64.43)ELK	A0A178U8Q4	ADF2;ADF3	Actin-depolymerizing factor 2;Actin-depolymerizing factor 3	U50	111.45	542830000
ANAASGMAVHDDCKLKFMELK	2	Acetyl (Protein N-term),Oxidation (M)	1			1	_(ac)ANAASGMAVHDDCKLKFM(ox)ELK_			ANAASGMAVHDDCKLKFM(1)ELK			ANAASGM(-76.22)AVHDDCKLKFM(76.22)ELK	A0A178U8Q4	ADF2;ADF3	Actin-depolymerizing factor 2;Actin-depolymerizing factor 3	U50	130.17	109810000
ANAASGMAVHDDCKLKFMELK	2	Acetyl (Protein N-term),Oxidation (M)	1			1	_(ac)ANAASGM(ox)AVHDDCKLKFMELK_			ANAASGM(1)AVHDDCKLKFMELK			ANAASGM(86.1)AVHDDCKLKFM(-86.1)ELK	A0A178U8Q4	ADF2;ADF3	Actin-depolymerizing factor 2;Actin-depolymerizing factor 3	U50	124.82	245540000
ANAASGMAVHDDCKLKFMELK	2	Acetyl (Protein N-term),Oxidation (M)	1			1	_(ac)ANAASGM(ox)AVHDDCKLKFMELK_			ANAASGM(1)AVHDDCKLKFMELK			ANAASGM(108.64)AVHDDCKLKFM(-108.64)ELK	A0A178U8Q4	ADF2;ADF3	Actin-depolymerizing factor 2;Actin-depolymerizing factor 3	U50	154.07	48748000
ANAASGMAVHDDCKLKFMELK	2	Acetyl (Protein N-term)	1				_(ac)ANAASGMAVHDDCKLKFMELK_							A0A178U8Q4	ADF2;ADF3	Actin-depolymerizing factor 2;Actin-depolymerizing factor 3	U50	163.62	88293000
ANAASGMAVHDDCKLKFMELK	2	Acetyl (Protein N-term)	1				_(ac)ANAASGMAVHDDCKLKFMELK_							A0A178U8Q4	ADF2;ADF3	Actin-depolymerizing factor 2;Actin-depolymerizing factor 3	U50	112.58	432610000
LKFMELK	1	Unmodified					_LKFMELK_							A0A178U8Q4	ADF2;At3g46000;ADF3	Actin-depolymerizing factor 2;Actin-depolymerizing factor 3	U0	130.04	270380000
LKFMELK	1	Unmodified					_LKFMELK_							A0A178U8Q4	ADF2;At3g46000;ADF3	Actin-depolymerizing factor 2;Actin-depolymerizing factor 3	U50	NaN	336670000
ELDGIQVELQATDPTEMDLDVFKSR	1	Oxidation (M)				1	_ELDGIQVELQATDPTEM(ox)DLDVFKSR_			ELDGIQVELQATDPTEM(1)DLDVFKSR			ELDGIQVELQATDPTEM(93.63)DLDVFKSR	A0A178U8Q4	ADF3	Actin-depolymerizing factor 3	U0	93.633	19727000
ELDGIQVELQATDPTEMDLDVFKSR	1	Unmodified					_ELDGIQVELQATDPTEMDLDVFKSR_							A0A178U8Q4	ADF3	Actin-depolymerizing factor 3	U0	NaN	13797000
ELDGIQVELQATDPTEMDLDVFKSR	1	Oxidation (M)				1	_ELDGIQVELQATDPTEM(ox)DLDVFKSR_			ELDGIQVELQATDPTEM(1)DLDVFKSR			ELDGIQVELQATDPTEM(207.13)DLDVFKSR	A0A178U8Q4	ADF3	Actin-depolymerizing factor 3	U50	207.13	123390000
ELDGIQVELQATDPTEMDLDVFKSR	1	Unmodified					_ELDGIQVELQATDPTEMDLDVFKSR_							A0A178U8Q4	ADF3	Actin-depolymerizing factor 3	U50	231.89	103950000
FIIYKIEELQK	1	Unmodified					_FIIYKIEELQK_							A0A178U8Q4	ADF3	Actin-depolymerizing factor 3	U0	152.04	5825200000
FIIYKIEELQK	1	Unmodified					_FIIYKIEELQK_							A0A178U8Q4	ADF3	Actin-depolymerizing factor 3	U0	269.59	3387400000
FIIYKIEELQK	1	Unmodified					_FIIYKIEELQK_							A0A178U8Q4	ADF3	Actin-depolymerizing factor 3	U0	242.12	7262500
FIIYKIEELQK	1	Unmodified					_FIIYKIEELQK_							A0A178U8Q4	ADF3	Actin-depolymerizing factor 3	U0	115.7	6426900
FIIYKIEELQK	1	Unmodified					_FIIYKIEELQK_							A0A178U8Q4	ADF3	Actin-depolymerizing factor 3	U0	88.596	8553200
FIIYKIEELQK	1	Unmodified					_FIIYKIEELQK_							A0A178U8Q4	ADF3	Actin-depolymerizing factor 3	U0	172.98	9641400
FIIYKIEELQK	1	Unmodified					_FIIYKIEELQK_							A0A178U8Q4	ADF3	Actin-depolymerizing factor 3	U50	157.97	9817100000
FIIYKIEELQK	1	Unmodified					_FIIYKIEELQK_							A0A178U8Q4	ADF3	Actin-depolymerizing factor 3	U50	246.93	5451700000
FIIYKIEELQK	1	Unmodified					_FIIYKIEELQK_							A0A178U8Q4	ADF3	Actin-depolymerizing factor 3	U50	102.55	17419000
FIIYKIEELQK	1	Unmodified					_FIIYKIEELQK_							A0A178U8Q4	ADF3	Actin-depolymerizing factor 3	U50	139.02	8627200
FIIYKIEELQK	1	Unmodified					_FIIYKIEELQK_							A0A178U8Q4	ADF3	Actin-depolymerizing factor 3	U50	134.66	11278000
FIIYKIEELQK	1	Unmodified					_FIIYKIEELQK_							A0A178U8Q4	ADF3	Actin-depolymerizing factor 3	U50	NaN	17566000
FIIYKIEELQKQVIVEK	2	Unmodified					_FIIYKIEELQKQVIVEK_							A0A178U8Q4	ADF3	Actin-depolymerizing factor 3	U0	216.19	28471000
FIIYKIEELQKQVIVEK	2	Unmodified					_FIIYKIEELQKQVIVEK_							A0A178U8Q4	ADF3	Actin-depolymerizing factor 3	U0	132.47	17346000
FIIYKIEELQKQVIVEK	2	Unmodified					_FIIYKIEELQKQVIVEK_							A0A178U8Q4	ADF3	Actin-depolymerizing factor 3	U0	NaN	830070
FIIYKIEELQKQVIVEK	2	Unmodified					_FIIYKIEELQKQVIVEK_							A0A178U8Q4	ADF3	Actin-depolymerizing factor 3	U50	217.91	380590000
FIIYKIEELQKQVIVEK	2	Unmodified					_FIIYKIEELQKQVIVEK_							A0A178U8Q4	ADF3	Actin-depolymerizing factor 3	U50	146.2	220480000
FIIYKIEELQKQVIVEK	2	Unmodified					_FIIYKIEELQKQVIVEK_							A0A178U8Q4	ADF3	Actin-depolymerizing factor 3	U50	253.16	18807000
FKRELDGIQVELQATDPTEMDLDVFK	2	Oxidation (M)				1	_FKRELDGIQVELQATDPTEM(ox)DLDVFK_							A0A178U8Q4	ADF3	Actin-depolymerizing factor 3	U0	NaN	3175800
FKRELDGIQVELQATDPTEMDLDVFK	2	Unmodified					_FKRELDGIQVELQATDPTEMDLDVFK_							A0A178U8Q4	ADF3	Actin-depolymerizing factor 3	U0	NaN	2171200
FKRELDGIQVELQATDPTEMDLDVFK	2	Oxidation (M)				1	_FKRELDGIQVELQATDPTEM(ox)DLDVFK_			FKRELDGIQVELQATDPTEM(1)DLDVFK			FKRELDGIQVELQATDPTEM(108.57)DLDVFK	A0A178U8Q4	ADF3	Actin-depolymerizing factor 3	U50	108.57	26172000
FKRELDGIQVELQATDPTEMDLDVFK	2	Unmodified					_FKRELDGIQVELQATDPTEMDLDVFK_							A0A178U8Q4	ADF3	Actin-depolymerizing factor 3	U50	131.94	30286000
FMELKTKR	2	Unmodified					_FMELKTKR_							A0A178U8Q4	ADF3	Actin-depolymerizing factor 3	U50	162.31	6028000
IEELQKQVIVEK	1	Unmodified					_IEELQKQVIVEK_							A0A178U8Q4	ADF3	Actin-depolymerizing factor 3	U0	180.09	264780000
IEELQKQVIVEK	1	Unmodified					_IEELQKQVIVEK_							A0A178U8Q4	ADF3	Actin-depolymerizing factor 3	U0	281.99	33026000
IEELQKQVIVEK	1	Unmodified					_IEELQKQVIVEK_							A0A178U8Q4	ADF3	Actin-depolymerizing factor 3	U50	149.57	551930000
IEELQKQVIVEKIGEPGQTHEDLAASLPADECR	2	Unmodified					_IEELQKQVIVEKIGEPGQTHEDLAASLPADECR_							A0A178U8Q4	ADF3	Actin-depolymerizing factor 3	U50	93.568	19336000
IFFVAWSPDTAR	0	Unmodified					_IFFVAWSPDTAR_							A0A178U8Q4	ADF3	Actin-depolymerizing factor 3	U0	202.36	2224800000
IFFVAWSPDTAR	0	Unmodified					_IFFVAWSPDTAR_							A0A178U8Q4	ADF3	Actin-depolymerizing factor 3	U0	NaN	755170
IFFVAWSPDTAR	0	Unmodified					_IFFVAWSPDTAR_							A0A178U8Q4	ADF3	Actin-depolymerizing factor 3	U0	NaN	132460000
IFFVAWSPDTAR	0	Unmodified					_IFFVAWSPDTAR_							A0A178U8Q4	ADF3	Actin-depolymerizing factor 3	U50	60.301	3373600
IFFVAWSPDTAR	0	Unmodified					_IFFVAWSPDTAR_							A0A178U8Q4	ADF3	Actin-depolymerizing factor 3	U50	211.27	6237400000
IFFVAWSPDTAR	0	Unmodified					_IFFVAWSPDTAR_							A0A178U8Q4	ADF3	Actin-depolymerizing factor 3	U50	131.54	266140000
IFFVAWSPDTARVR	1	Unmodified					_IFFVAWSPDTARVR_							A0A178U8Q4	ADF3	Actin-depolymerizing factor 3	U0	95.428	12550000
IFFVAWSPDTARVR	1	Unmodified					_IFFVAWSPDTARVR_							A0A178U8Q4	ADF3	Actin-depolymerizing factor 3	U50	170.66	135300000
IGEPGQTHEDLAASLPADECR	0	Unmodified					_IGEPGQTHEDLAASLPADECR_							A0A178U8Q4	ADF3	Actin-depolymerizing factor 3	U0	174.5	9678500000
IGEPGQTHEDLAASLPADECR	0	Unmodified					_IGEPGQTHEDLAASLPADECR_							A0A178U8Q4	ADF3	Actin-depolymerizing factor 3	U0	377.75	1195400000
IGEPGQTHEDLAASLPADECR	0	Unmodified					_IGEPGQTHEDLAASLPADECR_							A0A178U8Q4	ADF3	Actin-depolymerizing factor 3	U0	95.957	141000000
IGEPGQTHEDLAASLPADECR	0	Unmodified					_IGEPGQTHEDLAASLPADECR_							A0A178U8Q4	ADF3	Actin-depolymerizing factor 3	U0	64.295	2703900
IGEPGQTHEDLAASLPADECR	0	Unmodified					_IGEPGQTHEDLAASLPADECR_							A0A178U8Q4	ADF3	Actin-depolymerizing factor 3	U0	35.703
IGEPGQTHEDLAASLPADECR	0	Unmodified					_IGEPGQTHEDLAASLPADECR_							A0A178U8Q4	ADF3	Actin-depolymerizing factor 3	U0	NaN	1240900
IGEPGQTHEDLAASLPADECR	0	Methyl (KR)			1		_IGEPGQTHEDLAASLPADECR(me)_		IGEPGQTHEDLAASLPADECR(1)			IGEPGQTHEDLAASLPADECR(143.19)		A0A178U8Q4	ADF3	Actin-depolymerizing factor 3	U0	143.19	1171800000
IGEPGQTHEDLAASLPADECR	0	Methyl (KR)			1		_IGEPGQTHEDLAASLPADECR(me)_		IGEPGQTHEDLAASLPADECR(1)			IGEPGQTHEDLAASLPADECR(324.83)		A0A178U8Q4	ADF3	Actin-depolymerizing factor 3	U0	324.83	44163000
IGEPGQTHEDLAASLPADECR	0	Unmodified					_IGEPGQTHEDLAASLPADECR_							A0A178U8Q4	ADF3	Actin-depolymerizing factor 3	U50	178.73	14905000000
IGEPGQTHEDLAASLPADECR	0	Unmodified					_IGEPGQTHEDLAASLPADECR_							A0A178U8Q4	ADF3	Actin-depolymerizing factor 3	U50	373.1	1751000000
IGEPGQTHEDLAASLPADECR	0	Unmodified					_IGEPGQTHEDLAASLPADECR_							A0A178U8Q4	ADF3	Actin-depolymerizing factor 3	U50	121.47	258120000
IGEPGQTHEDLAASLPADECR	0	Unmodified					_IGEPGQTHEDLAASLPADECR_							A0A178U8Q4	ADF3	Actin-depolymerizing factor 3	U50	77.681	6047800
IGEPGQTHEDLAASLPADECR	0	Unmodified					_IGEPGQTHEDLAASLPADECR_							A0A178U8Q4	ADF3	Actin-depolymerizing factor 3	U50	46.578	1451400
IGEPGQTHEDLAASLPADECR	0	Unmodified					_IGEPGQTHEDLAASLPADECR_							A0A178U8Q4	ADF3	Actin-depolymerizing factor 3	U50	28.076
IGEPGQTHEDLAASLPADECR	0	Unmodified					_IGEPGQTHEDLAASLPADECR_							A0A178U8Q4	ADF3	Actin-depolymerizing factor 3	U50	33.909
IGEPGQTHEDLAASLPADECR	0	Unmodified					_IGEPGQTHEDLAASLPADECR_							A0A178U8Q4	ADF3	Actin-depolymerizing factor 3	U50	47.728	8619500
IGEPGQTHEDLAASLPADECR	0	Unmodified					_IGEPGQTHEDLAASLPADECR_							A0A178U8Q4	ADF3	Actin-depolymerizing factor 3	U50	45.784	1553000
IGEPGQTHEDLAASLPADECR	0	Methyl (KR)			1		_IGEPGQTHEDLAASLPADECR(me)_		IGEPGQTHEDLAASLPADECR(1)			IGEPGQTHEDLAASLPADECR(283.31)		A0A178U8Q4	ADF3	Actin-depolymerizing factor 3	U50	283.31	31089000
IGEPGQTHEDLAASLPADECR	0	Methyl (KR)			1		_IGEPGQTHEDLAASLPADECR(me)_		IGEPGQTHEDLAASLPADECR(1)			IGEPGQTHEDLAASLPADECR(157.73)		A0A178U8Q4	ADF3	Actin-depolymerizing factor 3	U50	157.73	902240000
IGEPGQTHEDLAASLPADECRYAIFDFDFVSSEGVPR	1	Unmodified					_IGEPGQTHEDLAASLPADECRYAIFDFDFVSSEGVPR_							A0A178U8Q4	ADF3	Actin-depolymerizing factor 3	U50	129.5	77355000
QVIVEKIGEPGQTHEDLAASLPADECR	1	Unmodified					_QVIVEKIGEPGQTHEDLAASLPADECR_							A0A178U8Q4	ADF3	Actin-depolymerizing factor 3	U0	247.39	55883000
QVIVEKIGEPGQTHEDLAASLPADECR	1	Unmodified					_QVIVEKIGEPGQTHEDLAASLPADECR_							A0A178U8Q4	ADF3	Actin-depolymerizing factor 3	U0	174.2	291780000
QVIVEKIGEPGQTHEDLAASLPADECR	1	Methyl (KR)			1		_QVIVEKIGEPGQTHEDLAASLPADECR(me)_		QVIVEKIGEPGQTHEDLAASLPADECR(1)			QVIVEK(-98.69)IGEPGQTHEDLAASLPADECR(98.69)		A0A178U8Q4	ADF3	Actin-depolymerizing factor 3	U0	117.61	16804000
QVIVEKIGEPGQTHEDLAASLPADECR	1	Unmodified					_QVIVEKIGEPGQTHEDLAASLPADECR_							A0A178U8Q4	ADF3	Actin-depolymerizing factor 3	U50	177.18	1882600000
QVIVEKIGEPGQTHEDLAASLPADECR	1	Unmodified					_QVIVEKIGEPGQTHEDLAASLPADECR_							A0A178U8Q4	ADF3	Actin-depolymerizing factor 3	U50	234.53	367970000
QVIVEKIGEPGQTHEDLAASLPADECR	1	Methyl (KR)			1		_QVIVEKIGEPGQTHEDLAASLPADECR(me)_		QVIVEKIGEPGQTHEDLAASLPADECR(1)			QVIVEK(-155.41)IGEPGQTHEDLAASLPADECR(155.41)		A0A178U8Q4	ADF3	Actin-depolymerizing factor 3	U50	178.69	94771000
QVIVEKIGEPGQTHEDLAASLPADECR	1	Methyl (KR)			1		_QVIVEKIGEPGQTHEDLAASLPADECR(me)_		QVIVEKIGEPGQTHEDLAASLPADECR(1)			QVIVEK(-136.1)IGEPGQTHEDLAASLPADECR(136.1)		A0A178U8Q4	ADF3	Actin-depolymerizing factor 3	U50	179.2	16092000
RTHRFIIYK	2	Unmodified					_RTHRFIIYK_							A0A178U8Q4	ADF3	Actin-depolymerizing factor 3	U50	52.725	2995700
SRIFFVAWSPDTAR	1	Unmodified					_SRIFFVAWSPDTAR_							A0A178U8Q4	ADF3	Actin-depolymerizing factor 3	U0	169.05	1116100000
SRIFFVAWSPDTAR	1	Unmodified					_SRIFFVAWSPDTAR_							A0A178U8Q4	ADF3	Actin-depolymerizing factor 3	U0	317.65	270120000
SRIFFVAWSPDTAR	1	Unmodified					_SRIFFVAWSPDTAR_							A0A178U8Q4	ADF3	Actin-depolymerizing factor 3	U50	174.44	4692600000
SRIFFVAWSPDTAR	1	Unmodified					_SRIFFVAWSPDTAR_							A0A178U8Q4	ADF3	Actin-depolymerizing factor 3	U50	286.26	1217600000
SRIFFVAWSPDTARVR	2	Unmodified					_SRIFFVAWSPDTARVR_							A0A178U8Q4	ADF3	Actin-depolymerizing factor 3	U50	107.5	12930000
SRIFFVAWSPDTARVR	2	Unmodified					_SRIFFVAWSPDTARVR_							A0A178U8Q4	ADF3	Actin-depolymerizing factor 3	U50	148.25	7445500
THRFIIYK	1	Unmodified					_THRFIIYK_							A0A178U8Q4	ADF3	Actin-depolymerizing factor 3	U0	NaN	3763200
THRFIIYK	1	Unmodified					_THRFIIYK_							A0A178U8Q4	ADF3	Actin-depolymerizing factor 3	U50	127.56	9470700
THRFIIYKIEELQK	2	Unmodified					_THRFIIYKIEELQK_							A0A178U8Q4	ADF3	Actin-depolymerizing factor 3	U0	187.49	87875000
THRFIIYKIEELQK	2	Unmodified					_THRFIIYKIEELQK_							A0A178U8Q4	ADF3	Actin-depolymerizing factor 3	U0	167.61	49351000
THRFIIYKIEELQK	2	Unmodified					_THRFIIYKIEELQK_							A0A178U8Q4	ADF3	Actin-depolymerizing factor 3	U0	56.514	2367700
THRFIIYKIEELQK	2	Unmodified					_THRFIIYKIEELQK_							A0A178U8Q4	ADF3	Actin-depolymerizing factor 3	U50	258.65	11570000
THRFIIYKIEELQK	2	Unmodified					_THRFIIYKIEELQK_							A0A178U8Q4	ADF3	Actin-depolymerizing factor 3	U50	169.8	500830000
THRFIIYKIEELQK	2	Unmodified					_THRFIIYKIEELQK_							A0A178U8Q4	ADF3	Actin-depolymerizing factor 3	U50	78.888	8855900
THRFIIYKIEELQK	2	Unmodified					_THRFIIYKIEELQK_							A0A178U8Q4	ADF3	Actin-depolymerizing factor 3	U50	74.966
THRFIIYKIEELQK	2	Unmodified					_THRFIIYKIEELQK_							A0A178U8Q4	ADF3	Actin-depolymerizing factor 3	U50	NaN	271490000
YAIFDFDFVSSEGVPR	0	Unmodified					_YAIFDFDFVSSEGVPR_							A0A178U8Q4	ADF3	Actin-depolymerizing factor 3	U0	150.09	34286000
YAIFDFDFVSSEGVPR	0	Unmodified					_YAIFDFDFVSSEGVPR_							A0A178U8Q4	ADF3	Actin-depolymerizing factor 3	U50	234.17	162670000
SGSQAVYEVTETKK	1	Unmodified					_SGSQAVYEVTETKK_							A0A178U8V7	HSP14.7	14.7 kDa heat shock protein	U0	47.844	3385400
NIQVWEVR	0	Unmodified					_NIQVWEVR_							A0A178U9C4	DHNAT2	1,4-dihydroxy-2-naphthoyl-CoA thioesterase 2	U0	112.17	8981600
SQDFLFISGTK	0	Unmodified					_SQDFLFISGTK_							A0A178U9N0	APS4	ATP sulfurylase 4, chloroplastic	U0	88.056	6724300
VLSMAPGLER	0	Oxidation (M)				1	_VLSM(ox)APGLER_			VLSM(1)APGLER			VLSM(73.98)APGLER	A0A178U9N0	APS4;APS1;APS3	ATP sulfurylase 4, chloroplastic;ATP sulfurylase 1, chloroplastic;ATP-sulfurylase 3, chloroplastic	U0	73.985	4919400
VLSMAPGLER	0	Unmodified					_VLSMAPGLER_							A0A178U9N0	APS4;APS1;APS3	ATP sulfurylase 4, chloroplastic;ATP sulfurylase 1, chloroplastic;ATP-sulfurylase 3, chloroplastic	U0	119.21	12269000
NPPAPAPAPPSK	0	Unmodified					_NPPAPAPAPPSK_							A0A178U9V3	At5g21160;LARP1A	La-related protein 1A	U0	92.445	2143400
NPPAPAPAPPSK	0	Unmodified					_NPPAPAPAPPSK_							A0A178U9V3	At5g21160;LARP1A	La-related protein 1A	U50	NaN	1605100
EICKYLFK	1	Unmodified					_EICKYLFK_							A0A178UA34	RPS10A;At4g25740;RPS10C;At5g52650	40S ribosomal protein S10-1;40S ribosomal protein S10-3	U0	161.11	28697000
EICKYLFK	1	Unmodified					_EICKYLFK_							A0A178UA34	RPS10A;At4g25740;RPS10C;At5g52650	40S ribosomal protein S10-1;40S ribosomal protein S10-3	U50	139.88	86865000
EICKYLFKEGVCFAK	2	Unmodified					_EICKYLFKEGVCFAK_							A0A178UA34	RPS10A;At4g25740;RPS10C;At5g52650	40S ribosomal protein S10-1;40S ribosomal protein S10-3	U0	64.136	10168000
EICKYLFKEGVCFAK	2	Unmodified					_EICKYLFKEGVCFAK_							A0A178UA34	RPS10A;At4g25740;RPS10C;At5g52650	40S ribosomal protein S10-1;40S ribosomal protein S10-3	U0	45.614	9856700
EICKYLFKEGVCFAK	2	Unmodified					_EICKYLFKEGVCFAK_							A0A178UA34	RPS10A;At4g25740;RPS10C;At5g52650	40S ribosomal protein S10-1;40S ribosomal protein S10-3	U50	108.06	34888000
EICKYLFKEGVCFAK	2	Unmodified					_EICKYLFKEGVCFAK_							A0A178UA34	RPS10A;At4g25740;RPS10C;At5g52650	40S ribosomal protein S10-1;40S ribosomal protein S10-3	U50	NaN	35690000
HPLIDVPNLQVIK	0	Unmodified					_HPLIDVPNLQVIK_							A0A178UA34	RPS10A;At4g25740;RPS10C;At5g52650	40S ribosomal protein S10-1;40S ribosomal protein S10-3	U0	147.26	659940000
HPLIDVPNLQVIK	0	Unmodified					_HPLIDVPNLQVIK_							A0A178UA34	RPS10A;At4g25740;RPS10C;At5g52650	40S ribosomal protein S10-1;40S ribosomal protein S10-3	U0	257.72	300140000
HPLIDVPNLQVIK	0	Unmodified					_HPLIDVPNLQVIK_							A0A178UA34	RPS10A;At4g25740;RPS10C;At5g52650	40S ribosomal protein S10-1;40S ribosomal protein S10-3	U50	113.38	937920000
HPLIDVPNLQVIK	0	Unmodified					_HPLIDVPNLQVIK_							A0A178UA34	RPS10A;At4g25740;RPS10C;At5g52650	40S ribosomal protein S10-1;40S ribosomal protein S10-3	U50	272.43	416840000
HPLIDVPNLQVIKLMQSFK	1	Oxidation (M)				1	_HPLIDVPNLQVIKLM(ox)QSFK_			HPLIDVPNLQVIKLM(1)QSFK			HPLIDVPNLQVIKLM(120.11)QSFK	A0A178UA34	RPS10A;At4g25740;RPS10C;At5g52650	40S ribosomal protein S10-1;40S ribosomal protein S10-3	U0	120.11	13338000
HPLIDVPNLQVIKLMQSFK	1	Oxidation (M)				1	_HPLIDVPNLQVIKLM(ox)QSFK_			HPLIDVPNLQVIKLM(1)QSFK			HPLIDVPNLQVIKLM(160.76)QSFK	A0A178UA34	RPS10A;At4g25740;RPS10C;At5g52650	40S ribosomal protein S10-1;40S ribosomal protein S10-3	U50	160.76	25017000
PGGRPFGGPPGDR	1	Unmodified					_PGGRPFGGPPGDR_							A0A178UA34	RPS10A;RPS10C;At5g52650	40S ribosomal protein S10-1;40S ribosomal protein S10-3	U0	136.8	181720000
PGGRPFGGPPGDR	1	Unmodified					_PGGRPFGGPPGDR_							A0A178UA34	RPS10A;RPS10C;At5g52650	40S ribosomal protein S10-1;40S ribosomal protein S10-3	U0	194.49	11118000
PGGRPFGGPPGDR	1	Unmodified					_PGGRPFGGPPGDR_							A0A178UA34	RPS10A;RPS10C;At5g52650	40S ribosomal protein S10-1;40S ribosomal protein S10-3	U50	139.86	504140000
PGGRPFGGPPGDR	1	Unmodified					_PGGRPFGGPPGDR_							A0A178UA34	RPS10A;RPS10C;At5g52650	40S ribosomal protein S10-1;40S ribosomal protein S10-3	U50	243.91	34742000
PGGRPFGGPPGDR	1	Unmodified					_PGGRPFGGPPGDR_							A0A178UA34	RPS10A;RPS10C;At5g52650	40S ribosomal protein S10-1;40S ribosomal protein S10-3	U50	244.74
SAKPGGRPFGGPPGDR	2	Unmodified					_SAKPGGRPFGGPPGDR_							A0A178UA34	RPS10A;RPS10C;At5g52650	40S ribosomal protein S10-1;40S ribosomal protein S10-3	U0	119.47	647880000
SAKPGGRPFGGPPGDR	2	Unmodified					_SAKPGGRPFGGPPGDR_							A0A178UA34	RPS10A;RPS10C;At5g52650	40S ribosomal protein S10-1;40S ribosomal protein S10-3	U0	151.08	21390000
SAKPGGRPFGGPPGDR	2	Unmodified					_SAKPGGRPFGGPPGDR_							A0A178UA34	RPS10A;RPS10C;At5g52650	40S ribosomal protein S10-1;40S ribosomal protein S10-3	U0	NaN	2140900
SAKPGGRPFGGPPGDR	2	Unmodified					_SAKPGGRPFGGPPGDR_							A0A178UA34	RPS10A;RPS10C;At5g52650	40S ribosomal protein S10-1;40S ribosomal protein S10-3	U50	248.76	157390000
SAKPGGRPFGGPPGDR	2	Unmodified					_SAKPGGRPFGGPPGDR_							A0A178UA34	RPS10A;RPS10C;At5g52650	40S ribosomal protein S10-1;40S ribosomal protein S10-3	U50	138.87	2528900000
SAKPGGRPFGGPPGDR	2	Unmodified					_SAKPGGRPFGGPPGDR_							A0A178UA34	RPS10A;RPS10C;At5g52650	40S ribosomal protein S10-1;40S ribosomal protein S10-3	U50	55.589	6679000
TYLNLPSDVVPATLK	0	Unmodified					_TYLNLPSDVVPATLK_							A0A178UA34	RPS10A;At4g25740;RPS10C;At5g52650	40S ribosomal protein S10-1;40S ribosomal protein S10-3	U0	NaN	460090000
TYLNLPSDVVPATLK	0	Unmodified					_TYLNLPSDVVPATLK_							A0A178UA34	RPS10A;At4g25740;RPS10C;At5g52650	40S ribosomal protein S10-1;40S ribosomal protein S10-3	U50	159.77	700170000
TYLNLPSDVVPATLKK	1	Unmodified					_TYLNLPSDVVPATLKK_							A0A178UA34	RPS10A;At4g25740;RPS10C;At5g52650	40S ribosomal protein S10-1;40S ribosomal protein S10-3	U0	123.76	366310000
TYLNLPSDVVPATLKK	1	Unmodified					_TYLNLPSDVVPATLKK_							A0A178UA34	RPS10A;At4g25740;RPS10C;At5g52650	40S ribosomal protein S10-1;40S ribosomal protein S10-3	U0	140.45	31612000
TYLNLPSDVVPATLKK	1	Unmodified					_TYLNLPSDVVPATLKK_							A0A178UA34	RPS10A;At4g25740;RPS10C;At5g52650	40S ribosomal protein S10-1;40S ribosomal protein S10-3	U50	122.96	706200000
TYLNLPSDVVPATLKK	1	Unmodified					_TYLNLPSDVVPATLKK_							A0A178UA34	RPS10A;At4g25740;RPS10C;At5g52650	40S ribosomal protein S10-1;40S ribosomal protein S10-3	U50	27.271	2617000
TYLNLPSDVVPATLKK	1	Unmodified					_TYLNLPSDVVPATLKK_							A0A178UA34	RPS10A;At4g25740;RPS10C;At5g52650	40S ribosomal protein S10-1;40S ribosomal protein S10-3	U50	NaN	60118000
YLFKEGVCFAK	1	Unmodified					_YLFKEGVCFAK_							A0A178UA34	RPS10A;At4g25740;RPS10C;At5g52650	40S ribosomal protein S10-1;40S ribosomal protein S10-3	U0	147.75	34309000
YLFKEGVCFAK	1	Unmodified					_YLFKEGVCFAK_							A0A178UA34	RPS10A;At4g25740;RPS10C;At5g52650	40S ribosomal protein S10-1;40S ribosomal protein S10-3	U0	98.353	165650000
YLFKEGVCFAK	1	Unmodified					_YLFKEGVCFAK_							A0A178UA34	RPS10A;At4g25740;RPS10C;At5g52650	40S ribosomal protein S10-1;40S ribosomal protein S10-3	U50	151.22	60934000
YLFKEGVCFAK	1	Unmodified					_YLFKEGVCFAK_							A0A178UA34	RPS10A;At4g25740;RPS10C;At5g52650	40S ribosomal protein S10-1;40S ribosomal protein S10-3	U50	86.313	277360000
YLFKEGVCFAKK	2	Unmodified					_YLFKEGVCFAKK_							A0A178UA34	RPS10A;At4g25740;RPS10C;At5g52650	40S ribosomal protein S10-1;40S ribosomal protein S10-3	U0	65.232	33531000
YLFKEGVCFAKK	2	Unmodified					_YLFKEGVCFAKK_							A0A178UA34	RPS10A;At4g25740;RPS10C;At5g52650	40S ribosomal protein S10-1;40S ribosomal protein S10-3	U0	NaN	2248100
YLFKEGVCFAKK	2	Unmodified					_YLFKEGVCFAKK_							A0A178UA34	RPS10A;At4g25740;RPS10C;At5g52650	40S ribosomal protein S10-1;40S ribosomal protein S10-3	U50	100.38	78436000
YLFKEGVCFAKK	2	Unmodified					_YLFKEGVCFAKK_							A0A178UA34	RPS10A;At4g25740;RPS10C;At5g52650	40S ribosomal protein S10-1;40S ribosomal protein S10-3	U50	106.62	5106300
LMQSFKSKEYVR	2	Oxidation (M)				1	_LM(ox)QSFKSKEYVR_			LM(1)QSFKSKEYVR			LM(74.46)QSFKSKEYVR	A0A178UA34	RPS10A;At4g25740;RPS10C;At5g52650;RPS10B	40S ribosomal protein S10-1;40S ribosomal protein S10-3;40S ribosomal protein S10-2	U50	74.46	3728100
AGGEFGGEKGGAPADYQPSFQGSGR	1	Unmodified					_AGGEFGGEKGGAPADYQPSFQGSGR_							A0A178UA34	RPS10C;At5g52650	40S ribosomal protein S10-3	U0	NaN	10663000
AGGEFGGEKGGAPADYQPSFQGSGR	1	Unmodified					_AGGEFGGEKGGAPADYQPSFQGSGR_							A0A178UA34	RPS10C;At5g52650	40S ribosomal protein S10-3	U50	81.763	8855500
AGGEFGGEKGGAPADYQPSFQGSGRGFGR	2	2 Dimethyl (KR)		2			_AGGEFGGEKGGAPADYQPSFQGSGR(di)GFGR(di)_	AGGEFGGEKGGAPADYQPSFQGSGR(1)GFGR(1)			AGGEFGGEK(-41.36)GGAPADYQPSFQGSGR(41.36)GFGR(44.97)			A0A178UA34	RPS10C;At5g52650	40S ribosomal protein S10-3	U50	46.847	8802600
DFNLAKHPLIDVPNLQVIK	1	Unmodified					_DFNLAKHPLIDVPNLQVIK_							A0A178UA34	RPS10C;At5g52650	40S ribosomal protein S10-3	U0	176.42	24704000
DFNLAKHPLIDVPNLQVIK	1	Unmodified					_DFNLAKHPLIDVPNLQVIK_							A0A178UA34	RPS10C;At5g52650	40S ribosomal protein S10-3	U50	177.4	52569000
EGVCFAKKDFNLAK	2	Unmodified					_EGVCFAKKDFNLAK_							A0A178UA34	RPS10C;At5g52650	40S ribosomal protein S10-3	U0	NaN	4515500
EGVCFAKKDFNLAK	2	Unmodified					_EGVCFAKKDFNLAK_							A0A178UA34	RPS10C;At5g52650	40S ribosomal protein S10-3	U0	NaN	7543500
EGVCFAKKDFNLAK	2	Unmodified					_EGVCFAKKDFNLAK_							A0A178UA34	RPS10C;At5g52650	40S ribosomal protein S10-3	U50	88.163	35507000
EGVCFAKKDFNLAK	2	Unmodified					_EGVCFAKKDFNLAK_							A0A178UA34	RPS10C;At5g52650	40S ribosomal protein S10-3	U50	70.373	19968000
FGDRDGYRAGPR	2	Unmodified					_FGDRDGYRAGPR_							A0A178UA34	RPS10C;At5g52650	40S ribosomal protein S10-3	U0	43.297	26993000
FGDRDGYRAGPR	2	Unmodified					_FGDRDGYRAGPR_							A0A178UA34	RPS10C;At5g52650	40S ribosomal protein S10-3	U0	NaN	908880
FGDRDGYRAGPR	2	Unmodified					_FGDRDGYRAGPR_							A0A178UA34	RPS10C;At5g52650	40S ribosomal protein S10-3	U50	128.57	171610000
FGDRDGYRAGPR	2	Unmodified					_FGDRDGYRAGPR_							A0A178UA34	RPS10C;At5g52650	40S ribosomal protein S10-3	U50	137.85	8993200
KDFNLAKHPLIDVPNLQVIK	2	Unmodified					_KDFNLAKHPLIDVPNLQVIK_							A0A178UA34	RPS10C;At5g52650	40S ribosomal protein S10-3	U0	75.319	13424000
KDFNLAKHPLIDVPNLQVIK	2	Unmodified					_KDFNLAKHPLIDVPNLQVIK_							A0A178UA34	RPS10C;At5g52650	40S ribosomal protein S10-3	U50	79.467	29060000
MIISEANR	0	Unmodified					_MIISEANR_							A0A178UA34	RPS10C;At5g52650	40S ribosomal protein S10-3	U0	107.43	56416000
MIISEANR	0	Unmodified					_MIISEANR_							A0A178UA34	RPS10C;At5g52650	40S ribosomal protein S10-3	U50	143.02	114150000
MIISEANRK	1	Acetyl (Protein N-term)	1				_(ac)MIISEANRK_							A0A178UA34	RPS10C;At5g52650	40S ribosomal protein S10-3	U50	142.64	9134200
MIISEANRKEICK	2	Oxidation (M)				1	_M(ox)IISEANRKEICK_			M(1)IISEANRKEICK			M(73.93)IISEANRKEICK	A0A178UA34	RPS10C;At5g52650	40S ribosomal protein S10-3	U0	73.927	8717700
MIISEANRKEICK	2	Oxidation (M)				1	_M(ox)IISEANRKEICK_			M(1)IISEANRKEICK			M(86.26)IISEANRKEICK	A0A178UA34	RPS10C;At5g52650	40S ribosomal protein S10-3	U0	86.262	6235000
MIISEANRKEICK	2	Unmodified					_MIISEANRKEICK_							A0A178UA34	RPS10C;At5g52650	40S ribosomal protein S10-3	U0	80.905	21715000
MIISEANRKEICK	2	Oxidation (M)				1	_M(ox)IISEANRKEICK_			M(1)IISEANRKEICK			M(89.66)IISEANRKEICK	A0A178UA34	RPS10C;At5g52650	40S ribosomal protein S10-3	U50	89.663	32044000
MIISEANRKEICK	2	Oxidation (M)				1	_M(ox)IISEANRKEICK_			M(1)IISEANRKEICK			M(100.22)IISEANRKEICK	A0A178UA34	RPS10C;At5g52650	40S ribosomal protein S10-3	U50	100.22	27312000
MIISEANRKEICK	2	Unmodified					_MIISEANRKEICK_							A0A178UA34	RPS10C;At5g52650	40S ribosomal protein S10-3	U50	96.756	77516000
PGGRPFGGPPGDRSR	2	Unmodified					_PGGRPFGGPPGDRSR_							A0A178UA34	RPS10C;At5g52650	40S ribosomal protein S10-3	U50	54.501	2052200
VTKEQVEASLTSK	1	Unmodified					_VTKEQVEASLTSK_							A0A178UA44	BOLA2	Protein BOLA2	U0	122.97	6410700
VTKEQVEASLTSK	1	Unmodified					_VTKEQVEASLTSK_							A0A178UA44	BOLA2	Protein BOLA2	U50	96.464	6002300
NLVPGEAVYNEK	0	Unmodified					_NLVPGEAVYNEK_							A0A178UA89	MED36B;MED36A	Probable mediator of RNA polymerase II transcription subunit 36b;Mediator of RNA polymerase II transcription subunit 36a	U0	120.22	8186800
DMIAKKDEELQK	2	Methyl (KR)			1		_DMIAK(me)KDEELQK_							A0A178UAD3	At5g41310	Kinesin-like protein	U0	NaN	4262000
DMIAKKDEELQK	2	Methyl (KR)			1		_DMIAK(me)KDEELQK_		DMIAK(0.5)K(0.5)DEELQK			DMIAK(0)K(0)DEELQK(-88.39)		A0A178UAD3	At5g41310	Kinesin-like protein	U50	88.392	11850000
VSYITPSTTQR	0	Unmodified					_VSYITPSTTQR_							A0A178UAE4	PVA21	Vesicle-associated protein 2-1;Vesicle-associated protein 2-1, N-terminally processed	U0	NaN	1987900
VSYITPSTTQR	0	Unmodified					_VSYITPSTTQR_							A0A178UAE4	PVA21	Vesicle-associated protein 2-1;Vesicle-associated protein 2-1, N-terminally processed	U50	98.055	2787500
FAPPKTPGVDDITGEPLIQR	1	Unmodified					_FAPPKTPGVDDITGEPLIQR_							A0A178UAM7	ADK1	Adenylate kinase 4	U0	76.027	5962100
FAPPKTPGVDDITGEPLIQR	1	Unmodified					_FAPPKTPGVDDITGEPLIQR_							A0A178UAM7	ADK1	Adenylate kinase 4	U50	69.122	5665500
LAAFHSQTQPVIDYYAK	0	Unmodified					_LAAFHSQTQPVIDYYAK_							A0A178UAM7	ADK1;At5g63400	Adenylate kinase 4	U0	NaN	8910700
LAAFHSQTQPVIDYYAK	0	Unmodified					_LAAFHSQTQPVIDYYAK_							A0A178UAM7	ADK1;At5g63400	Adenylate kinase 4	U50	58.246	8400500
LIFIGPPGSGK	0	Unmodified					_LIFIGPPGSGK_							A0A178UAM7	ADK1;At5g63400	Adenylate kinase 4	U0	74.376	14957000
LIFIGPPGSGK	0	Unmodified					_LIFIGPPGSGK_							A0A178UAM7	ADK1;At5g63400	Adenylate kinase 4	U50	99.815	67975000
TVTQAEKLDEMLK	1	Unmodified					_TVTQAEKLDEMLK_							A0A178UAM7	ADK1;At5g63400	Adenylate kinase 4	U0	98.902	11106000
TVTQAEKLDEMLK	1	Unmodified					_TVTQAEKLDEMLK_							A0A178UAM7	ADK1;At5g63400	Adenylate kinase 4	U0	NaN	2650800
TVTQAEKLDEMLK	1	Unmodified					_TVTQAEKLDEMLK_							A0A178UAM7	ADK1;At5g63400	Adenylate kinase 4	U50	86.288	48227000
TVTQAEKLDEMLK	1	Unmodified					_TVTQAEKLDEMLK_							A0A178UAM7	ADK1;At5g63400	Adenylate kinase 4	U50	199.7	8158700
TVTQAEKLDEMLKR	2	Oxidation (M)				1	_TVTQAEKLDEM(ox)LKR_							A0A178UAM7	ADK1;At5g63400	Adenylate kinase 4	U0	NaN	1264700
TVTQAEKLDEMLKR	2	Unmodified					_TVTQAEKLDEMLKR_							A0A178UAM7	ADK1;At5g63400	Adenylate kinase 4	U0	NaN	5462000
TVTQAEKLDEMLKR	2	Unmodified					_TVTQAEKLDEMLKR_							A0A178UAM7	ADK1;At5g63400	Adenylate kinase 4	U0	NaN	8921000
TVTQAEKLDEMLKR	2	Oxidation (M)				1	_TVTQAEKLDEM(ox)LKR_			TVTQAEKLDEM(1)LKR			TVTQAEKLDEM(49.22)LKR	A0A178UAM7	ADK1;At5g63400	Adenylate kinase 4	U50	49.216	7155600
TVTQAEKLDEMLKR	2	Unmodified					_TVTQAEKLDEMLKR_							A0A178UAM7	ADK1;At5g63400	Adenylate kinase 4	U50	134.61	17850000
TVTQAEKLDEMLKR	2	Unmodified					_TVTQAEKLDEMLKR_							A0A178UAM7	ADK1;At5g63400	Adenylate kinase 4	U50	121.56	23268000
CQKGFILDGFPR	1	Unmodified					_CQKGFILDGFPR_							A0A178UAM7	ADK1;At5g63400;ADK2	Adenylate kinase 4;Adenylate kinase 3	U50	71.153
GFILDGFPR	0	Unmodified					_GFILDGFPR_							A0A178UAM7	ADK1;At5g63400;ADK2	Adenylate kinase 4;Adenylate kinase 3	U0	145.04	23501000
GFILDGFPR	0	Unmodified					_GFILDGFPR_							A0A178UAM7	ADK1;At5g63400;ADK2	Adenylate kinase 4;Adenylate kinase 3	U50	174.21	61691000
GFILDGFPR	0	Unmodified					_GFILDGFPR_							A0A178UAM7	ADK1;At5g63400;ADK2	Adenylate kinase 4;Adenylate kinase 3	U50	NaN	1235400
SENKVCFDCSAK	1	Unmodified					_SENKVCFDCSAK_							A0A178UAW4	AGD8;AGD9	Probable ADP-ribosylation factor GTPase-activating protein AGD8;Probable ADP-ribosylation factor GTPase-activating protein AGD9	U0	33.424	5255900
SENKVCFDCSAK	1	Unmodified					_SENKVCFDCSAK_							A0A178UAW4	AGD8;AGD9	Probable ADP-ribosylation factor GTPase-activating protein AGD8;Probable ADP-ribosylation factor GTPase-activating protein AGD9	U50	NaN	2046400
STNLDSWSPEQLR	0	Unmodified					_STNLDSWSPEQLR_							A0A178UAW4	AGD8;AGD9	Probable ADP-ribosylation factor GTPase-activating protein AGD8;Probable ADP-ribosylation factor GTPase-activating protein AGD9	U0	192.44	85991000
STNLDSWSPEQLR	0	Unmodified					_STNLDSWSPEQLR_							A0A178UAW4	AGD8;AGD9	Probable ADP-ribosylation factor GTPase-activating protein AGD8;Probable ADP-ribosylation factor GTPase-activating protein AGD9	U0	62.081	7267400
STNLDSWSPEQLR	0	Unmodified					_STNLDSWSPEQLR_							A0A178UAW4	AGD8;AGD9	Probable ADP-ribosylation factor GTPase-activating protein AGD8;Probable ADP-ribosylation factor GTPase-activating protein AGD9	U50	227.94	25738000
STNLDSWSPEQLR	0	Unmodified					_STNLDSWSPEQLR_							A0A178UAW4	AGD8;AGD9	Probable ADP-ribosylation factor GTPase-activating protein AGD8;Probable ADP-ribosylation factor GTPase-activating protein AGD9	U50	NaN	2336500
TMMFGGNNR	0	Unmodified					_TMMFGGNNR_							A0A178UAW4	AGD8;AGD9	Probable ADP-ribosylation factor GTPase-activating protein AGD8;Probable ADP-ribosylation factor GTPase-activating protein AGD9	U0	127.12	38302000
TMMFGGNNR	0	Unmodified					_TMMFGGNNR_							A0A178UAW4	AGD8;AGD9	Probable ADP-ribosylation factor GTPase-activating protein AGD8;Probable ADP-ribosylation factor GTPase-activating protein AGD9	U50	94.262	13237000
AADMYRQTLAK	1	Unmodified					_AADMYRQTLAK_							A0A178UAW4	AGD9	Probable ADP-ribosylation factor GTPase-activating protein AGD9	U0	77.124	11470000
AADMYRQTLAK	1	Unmodified					_AADMYRQTLAK_							A0A178UAW4	AGD9	Probable ADP-ribosylation factor GTPase-activating protein AGD9	U50	42.475	6442200
AQVFFKQHGWNDGGKIEAK	2	Unmodified					_AQVFFKQHGWNDGGKIEAK_							A0A178UAW4	AGD9	Probable ADP-ribosylation factor GTPase-activating protein AGD9	U0	56.719	13781000
ATENLTDKNVVFR	1	Acetyl (Protein N-term)	1				_(ac)ATENLTDKNVVFR_							A0A178UAW4	AGD9	Probable ADP-ribosylation factor GTPase-activating protein AGD9	U0	301.11	116230000
ATENLTDKNVVFR	1	Acetyl (Protein N-term)	1				_(ac)ATENLTDKNVVFR_							A0A178UAW4	AGD9	Probable ADP-ribosylation factor GTPase-activating protein AGD9	U0	167.71	12439000
ATENLTDKNVVFR	1	Acetyl (Protein N-term)	1				_(ac)ATENLTDKNVVFR_							A0A178UAW4	AGD9	Probable ADP-ribosylation factor GTPase-activating protein AGD9	U50	293.88	29423000
ATENLTDKNVVFR	1	Acetyl (Protein N-term)	1				_(ac)ATENLTDKNVVFR_							A0A178UAW4	AGD9	Probable ADP-ribosylation factor GTPase-activating protein AGD9	U50	NaN	2394800
ATENLTDKNVVFRK	2	Acetyl (Protein N-term)	1				_(ac)ATENLTDKNVVFRK_							A0A178UAW4	AGD9	Probable ADP-ribosylation factor GTPase-activating protein AGD9	U0	128.96	186250000
ATENLTDKNVVFRK	2	Acetyl (Protein N-term)	1				_(ac)ATENLTDKNVVFRK_							A0A178UAW4	AGD9	Probable ADP-ribosylation factor GTPase-activating protein AGD9	U0	254.07	8280400
ATENLTDKNVVFRK	2	Acetyl (Protein N-term)	1				_(ac)ATENLTDKNVVFRK_							A0A178UAW4	AGD9	Probable ADP-ribosylation factor GTPase-activating protein AGD9	U50	153.32	47722000
FEYFDDEQSGGQSGTR	0	Unmodified					_FEYFDDEQSGGQSGTR_							A0A178UAW4	AGD9	Probable ADP-ribosylation factor GTPase-activating protein AGD9	U0	120.57	3614200
FEYFDDEQSGGQSGTR	0	Unmodified					_FEYFDDEQSGGQSGTR_							A0A178UAW4	AGD9	Probable ADP-ribosylation factor GTPase-activating protein AGD9	U50	NaN	2096200
SLGVHISFVR	0	Unmodified					_SLGVHISFVR_							A0A178UAW4	AGD9;AGD10	Probable ADP-ribosylation factor GTPase-activating protein AGD9;ADP-ribosylation factor GTPase-activating protein AGD10	U0	120.33	5891400
SLGVHISFVR	0	Unmodified					_SLGVHISFVR_							A0A178UAW4	AGD9;AGD10	Probable ADP-ribosylation factor GTPase-activating protein AGD9;ADP-ribosylation factor GTPase-activating protein AGD10	U50	NaN	1758400
HVPITVSTFKR	1	Unmodified					_HVPITVSTFKR_							A0A178UBX7	CYP28	Peptidyl-prolyl cis-trans isomerase CYP28, chloroplastic	U0	160.33	18470000
IFPGQYFLAGR	0	Unmodified					_IFPGQYFLAGR_							A0A178UBX7	CYP28	Peptidyl-prolyl cis-trans isomerase CYP28, chloroplastic	U0	155	21914000
MCTSSSTSYKNTPVHK	1	Unmodified					_MCTSSSTSYKNTPVHK_							A0A178UBX7	CYP28	Peptidyl-prolyl cis-trans isomerase CYP28, chloroplastic	U0	63.128	1194500
MCTSSSTSYKNTPVHK	1	Unmodified					_MCTSSSTSYKNTPVHK_							A0A178UBX7	CYP28	Peptidyl-prolyl cis-trans isomerase CYP28, chloroplastic	U50	NaN	570640
VVLGLYGR	0	Unmodified					_VVLGLYGR_							A0A178UBX7	CYP28	Peptidyl-prolyl cis-trans isomerase CYP28, chloroplastic	U0	146.21	21754000
VVLGLYGR	0	Unmodified					_VVLGLYGR_							A0A178UBX7	CYP28	Peptidyl-prolyl cis-trans isomerase CYP28, chloroplastic	U50	129.96	7196700
FLVICHKDFQK	1	Methyl (KR)			1		_FLVICHK(me)DFQK_		FLVICHK(0.974)DFQK(0.026)			FLVICHK(15.66)DFQK(-15.66)		A0A178UBY6	ELF6	Probable lysine-specific demethylase ELF6	U0	50.353	11054000
FLVICHKDFQK	1	Methyl (KR)			1		_FLVICHK(me)DFQK_							A0A178UBY6	ELF6	Probable lysine-specific demethylase ELF6	U50	NaN	11435000
FFDNAIGVNVPR	0	Unmodified					_FFDNAIGVNVPR_							A0A178UCA6	UGP2	Probable UTP--glucose-1-phosphate uridylyltransferase 2;UTP--glucose-1-phosphate uridylyltransferase 1	U0	173.39	49489000
FFDNAIGVNVPR	0	Unmodified					_FFDNAIGVNVPR_							A0A178UCA6	UGP2	Probable UTP--glucose-1-phosphate uridylyltransferase 2;UTP--glucose-1-phosphate uridylyltransferase 1	U0	44.612	4403000
FFDNAIGVNVPR	0	Unmodified					_FFDNAIGVNVPR_							A0A178UCA6	UGP2	Probable UTP--glucose-1-phosphate uridylyltransferase 2;UTP--glucose-1-phosphate uridylyltransferase 1	U50	191.67	22408000
FFDNAIGVNVPR	0	Unmodified					_FFDNAIGVNVPR_							A0A178UCA6	UGP2	Probable UTP--glucose-1-phosphate uridylyltransferase 2;UTP--glucose-1-phosphate uridylyltransferase 1	U50	NaN	1951000
SIPSIVELDSLK	0	Unmodified					_SIPSIVELDSLK_							A0A178UCA6	UGP2	Probable UTP--glucose-1-phosphate uridylyltransferase 2;UTP--glucose-1-phosphate uridylyltransferase 1	U0	89.679	16285000
VLQLETAAGAAIR	0	Unmodified					_VLQLETAAGAAIR_							A0A178UCA6	UGP2	Probable UTP--glucose-1-phosphate uridylyltransferase 2;UTP--glucose-1-phosphate uridylyltransferase 1	U0	159.83	20236000
VLQLETAAGAAIR	0	Unmodified					_VLQLETAAGAAIR_							A0A178UCA6	UGP2	Probable UTP--glucose-1-phosphate uridylyltransferase 2;UTP--glucose-1-phosphate uridylyltransferase 1	U50	143.5	7802300
AATATEKLPQLK	1	Acetyl (Protein N-term)	1				_(ac)AATATEKLPQLK_							A0A178UCA6		UTP--glucose-1-phosphate uridylyltransferase 1	U0	192.12	11350000
AATATEKLPQLK	1	Acetyl (Protein N-term)	1				_(ac)AATATEKLPQLK_							A0A178UCA6		UTP--glucose-1-phosphate uridylyltransferase 1	U50	183.78	9894800
ANAGTKLEIPDNAVLENK	1	Unmodified					_ANAGTKLEIPDNAVLENK_							A0A178UCA6	UGP2	UTP--glucose-1-phosphate uridylyltransferase 1	U0	85.087	7000200
ANAGTKLEIPDNAVLENKDINGPEDL	2	Unmodified					_ANAGTKLEIPDNAVLENKDINGPEDL_							A0A178UCA6	UGP2	UTP--glucose-1-phosphate uridylyltransferase 1	U0	37.938	3103700
ANAGTKLEIPDNAVLENKDINGPEDL	2	Unmodified					_ANAGTKLEIPDNAVLENKDINGPEDL_							A0A178UCA6	UGP2	UTP--glucose-1-phosphate uridylyltransferase 1	U50	NaN	3715200
IQTPTDEIVVPYDK	0	Unmodified					_IQTPTDEIVVPYDK_							A0A178UCA6		UTP--glucose-1-phosphate uridylyltransferase 1	U0	99.5	3876400
IQTPTDEIVVPYDK	0	Unmodified					_IQTPTDEIVVPYDK_							A0A178UCA6		UTP--glucose-1-phosphate uridylyltransferase 1	U50	NaN	2826000
SGFINLVSR	0	Unmodified					_SGFINLVSR_							A0A178UCA6		UTP--glucose-1-phosphate uridylyltransferase 1	U0	85.676	3108200
TNPTNPAIELGPEFK	0	Unmodified					_TNPTNPAIELGPEFK_							A0A178UCA6	UGP2	UTP--glucose-1-phosphate uridylyltransferase 1	U0	133.49	13966000
TNPTNPAIELGPEFK	0	Unmodified					_TNPTNPAIELGPEFK_							A0A178UCA6	UGP2	UTP--glucose-1-phosphate uridylyltransferase 1	U50	135.6	6304400
TNPTNPAIELGPEFKK	1	Unmodified					_TNPTNPAIELGPEFKK_							A0A178UCA6	UGP2	UTP--glucose-1-phosphate uridylyltransferase 1	U0	103.13	57644000
TNPTNPAIELGPEFKK	1	Unmodified					_TNPTNPAIELGPEFKK_							A0A178UCA6	UGP2	UTP--glucose-1-phosphate uridylyltransferase 1	U0	119.69	4386500
TNPTNPAIELGPEFKK	1	Unmodified					_TNPTNPAIELGPEFKK_							A0A178UCA6	UGP2	UTP--glucose-1-phosphate uridylyltransferase 1	U50	66.977	36061000
TNPTNPAIELGPEFKK	1	Unmodified					_TNPTNPAIELGPEFKK_							A0A178UCA6	UGP2	UTP--glucose-1-phosphate uridylyltransferase 1	U50	NaN	2756200
DGEEGEEAAVAAPEEVKK	1	Unmodified					_DGEEGEEAAVAAPEEVKK_							A0A178UCD3	RPS8A	40S ribosomal protein S8-1	U0	20.079	5252000
LLACISSRPGQCGR	1	Unmodified					_LLACISSRPGQCGR_							A0A178UCD3	RPS8A;At5g20290	40S ribosomal protein S8-1	U0	100.22	11217000
LLACISSRPGQCGR	1	Unmodified					_LLACISSRPGQCGR_							A0A178UCD3	RPS8A;At5g20290	40S ribosomal protein S8-1	U50	NaN	2746600
SLDSHIEDQFASGR	0	Unmodified					_SLDSHIEDQFASGR_							A0A178UCD3	RPS8A;At5g20290	40S ribosomal protein S8-1	U0	120.49	24903000
SLDSHIEDQFASGR	0	Unmodified					_SLDSHIEDQFASGR_							A0A178UCD3	RPS8A;At5g20290	40S ribosomal protein S8-1	U0	153.25	7602200
SLDSHIEDQFASGR	0	Unmodified					_SLDSHIEDQFASGR_							A0A178UCD3	RPS8A;At5g20290	40S ribosomal protein S8-1	U50	NaN	14452000
VLDVVYNASNNELVR	0	Unmodified					_VLDVVYNASNNELVR_							A0A178UCD3	RPS8A	40S ribosomal protein S8-1	U0	138.75	1697300
AGAPADYQPGFR	0	Unmodified					_AGAPADYQPGFR_							A0A178UD67	RPS10B;At5g41520	40S ribosomal protein S10-2	U50	93.267	7689600
SGGEYGDKAGAPADYQPGFR	1	Unmodified					_SGGEYGDKAGAPADYQPGFR_							A0A178UD67	RPS10B;At5g41520	40S ribosomal protein S10-2	U50	133.24	53107000
SGGEYGDKAGAPADYQPGFRGGAGGAR	2	Unmodified					_SGGEYGDKAGAPADYQPGFRGGAGGAR_							A0A178UD67	RPS10B;At5g41520	40S ribosomal protein S10-2	U50	109.19	25472000
TYLNLPSEIVPATLKK	1	Unmodified					_TYLNLPSEIVPATLKK_							A0A178UD67	RPS10B;At5g41520	40S ribosomal protein S10-2	U50	55.097	15282000
YLFKEGVLFAK	1	Unmodified					_YLFKEGVLFAK_							A0A178UD67	RPS10B	40S ribosomal protein S10-2	U0	NaN	510570
YLFKEGVLFAK	1	Unmodified					_YLFKEGVLFAK_							A0A178UD67	RPS10B	40S ribosomal protein S10-2	U50	65.395	3401600
FTEPQPDYSAFR	0	Unmodified					_FTEPQPDYSAFR_							A0A178UD94	PAP26	Bifunctional purple acid phosphatase 26;Acid phosphatase;Peroxidase	U0	NaN	1988100
FTEPQPDYSAFR	0	Unmodified					_FTEPQPDYSAFR_							A0A178UD94	PAP26	Bifunctional purple acid phosphatase 26;Acid phosphatase;Peroxidase	U50	153.97	6075000
NKIDITVPTGAQIIYSK	1	Unmodified					_NKIDITVPTGAQIIYSK_							A0A178UDQ4	CPN21	20 kDa chaperonin, chloroplastic	U50	91.14	6675800
VAEAEEKTAGGLLLTETTK	1	Unmodified					_VAEAEEKTAGGLLLTETTK_							A0A178UDQ4	CPN21	20 kDa chaperonin, chloroplastic	U50	72.948	9089000
VIMLAQEEAR	0	Unmodified					_VIMLAQEEAR_							A0A178UE63	CLPC1	Chaperone protein ClpC1, chloroplastic	U50	119.21	7436400
VIMLAQEEARR	1	Unmodified					_VIMLAQEEARR_							A0A178UE63	CLPC1	Chaperone protein ClpC1, chloroplastic	U50	108.7	11032000
AVIDINQPQVCK	0	Unmodified					_AVIDINQPQVCK_							A0A178UE66	RAR1	Cysteine and histidine-rich domain-containing protein RAR1	U50	108.81
GTVVLSEFSATSTNASSISK	0	Unmodified					_GTVVLSEFSATSTNASSISK_							A0A178UF45	VAMP713	Vesicle-associated membrane protein 713	U0	NaN	1146800
GTVVLSEFSATSTNASSISK	0	Unmodified					_GTVVLSEFSATSTNASSISK_							A0A178UF45	VAMP713	Vesicle-associated membrane protein 713	U50	132.08	2075600
RTDGLTVLCMADETAGR	1	Unmodified					_RTDGLTVLCMADETAGR_							A0A178UF45	VAMP713	Vesicle-associated membrane protein 713	U0	59.512	2431400
RTDGLTVLCMADETAGR	1	Unmodified					_RTDGLTVLCMADETAGR_							A0A178UF45	VAMP713	Vesicle-associated membrane protein 713	U50	73.11	5631300
AEQYLADSGTPYTIIR	0	Unmodified					_AEQYLADSGTPYTIIR_							A0A178UFR7		Uncharacterized protein At5g02240	U0	161.48	5481800
AFDLGSKPEGTSTPTK	1	Unmodified					_AFDLGSKPEGTSTPTK_							A0A178UFR7		Uncharacterized protein At5g02240	U0	97.291	10982000
AFDLGSKPEGTSTPTK	1	Unmodified					_AFDLGSKPEGTSTPTK_							A0A178UFR7		Uncharacterized protein At5g02240	U50	NaN	4127600
AFDLGSKPEGTSTPTKDFK	2	Unmodified					_AFDLGSKPEGTSTPTKDFK_							A0A178UFR7		Uncharacterized protein At5g02240	U0	81.723	69601000
AFDLGSKPEGTSTPTKDFK	2	Unmodified					_AFDLGSKPEGTSTPTKDFK_							A0A178UFR7		Uncharacterized protein At5g02240	U0	121.82	24271000
ALFSQVTSR	0	Unmodified					_ALFSQVTSR_							A0A178UFR7		Uncharacterized protein At5g02240	U0	124.08	8042000
ALFSQVTSRF	1	Unmodified					_ALFSQVTSRF_							A0A178UFR7		Uncharacterized protein At5g02240	U0	144.5	61390000
ALFSQVTSRF	1	Unmodified					_ALFSQVTSRF_							A0A178UFR7		Uncharacterized protein At5g02240	U50	128.36	22084000
ELLVGKDDELLQTDTK	1	Unmodified					_ELLVGKDDELLQTDTK_							A0A178UFR7		Uncharacterized protein At5g02240	U0	154.99	39148000
ELLVGKDDELLQTDTK	1	Unmodified					_ELLVGKDDELLQTDTK_							A0A178UFR7		Uncharacterized protein At5g02240	U0	216.34	4862600
ELLVGKDDELLQTDTK	1	Unmodified					_ELLVGKDDELLQTDTK_							A0A178UFR7		Uncharacterized protein At5g02240	U50	131.61	13299000
ELLVGKDDELLQTDTK	1	Unmodified					_ELLVGKDDELLQTDTK_							A0A178UFR7		Uncharacterized protein At5g02240	U50	NaN	2424000
HIVVVGSMGGTNPDHPLNK	0	Oxidation (M)				1	_HIVVVGSM(ox)GGTNPDHPLNK_			HIVVVGSM(1)GGTNPDHPLNK			HIVVVGSM(180.56)GGTNPDHPLNK	A0A178UFR7		Uncharacterized protein At5g02240	U0	180.56	13139000
HIVVVGSMGGTNPDHPLNK	0	Oxidation (M)				1	_HIVVVGSM(ox)GGTNPDHPLNK_			HIVVVGSM(1)GGTNPDHPLNK			HIVVVGSM(71.78)GGTNPDHPLNK	A0A178UFR7		Uncharacterized protein At5g02240	U0	71.781	7975700
HIVVVGSMGGTNPDHPLNK	0	Unmodified					_HIVVVGSMGGTNPDHPLNK_							A0A178UFR7		Uncharacterized protein At5g02240	U0	188.27	34107000
HIVVVGSMGGTNPDHPLNK	0	Unmodified					_HIVVVGSMGGTNPDHPLNK_							A0A178UFR7		Uncharacterized protein At5g02240	U0	99.747	22688000
HIVVVGSMGGTNPDHPLNK	0	Oxidation (M)				1	_HIVVVGSM(ox)GGTNPDHPLNK_			HIVVVGSM(1)GGTNPDHPLNK			HIVVVGSM(93.78)GGTNPDHPLNK	A0A178UFR7		Uncharacterized protein At5g02240	U50	93.777	6550300
HIVVVGSMGGTNPDHPLNK	0	Unmodified					_HIVVVGSMGGTNPDHPLNK_							A0A178UFR7		Uncharacterized protein At5g02240	U50	148.41	12127000
HIVVVGSMGGTNPDHPLNK	0	Unmodified					_HIVVVGSMGGTNPDHPLNK_							A0A178UFR7		Uncharacterized protein At5g02240	U50	42.044	8635300
KAEQYLADSGTPYTIIR	1	Unmodified					_KAEQYLADSGTPYTIIR_							A0A178UFR7		Uncharacterized protein At5g02240	U0	176.26	44094000
KAEQYLADSGTPYTIIR	1	Unmodified					_KAEQYLADSGTPYTIIR_							A0A178UFR7		Uncharacterized protein At5g02240	U0	259.1	5219100
KAEQYLADSGTPYTIIR	1	Unmodified					_KAEQYLADSGTPYTIIR_							A0A178UFR7		Uncharacterized protein At5g02240	U50	149.19	17751000
KAEQYLADSGTPYTIIR	1	Unmodified					_KAEQYLADSGTPYTIIR_							A0A178UFR7		Uncharacterized protein At5g02240	U50	NaN	1928700
LGNGNILVWKR	1	Unmodified					_LGNGNILVWKR_							A0A178UFR7		Uncharacterized protein At5g02240	U0	131.12	10014000
LGNGNILVWKR	1	Unmodified					_LGNGNILVWKR_							A0A178UFR7		Uncharacterized protein At5g02240	U50	39.148	4392200
NQIDAAKVAGVK	1	Unmodified					_NQIDAAKVAGVK_							A0A178UFR7		Uncharacterized protein At5g02240	U0	69.451	6003100
NQIDAAKVAGVK	1	Unmodified					_NQIDAAKVAGVK_							A0A178UFR7		Uncharacterized protein At5g02240	U50	NaN	2976600
LFKEKFEDK	2	Methyl (KR),Dimethyl (KR)		1	1		_LFKEK(di)FEDK(me)_	LFK(0.181)EK(0.818)FEDK(0.001)	LFK(0.001)EK(0.004)FEDK(0.995)		LFK(-6.63)EK(6.63)FEDK(-29.02)	LFK(-30.61)EK(-24.14)FEDK(24.14)		A0A178UGA7	PI4KB2	Phosphatidylinositol 4-kinase beta 2	U0	49.715	57225000
LFKEKFEDK	2	Methyl (KR),Dimethyl (KR)		1	1		_LFKEK(di)FEDK(me)_	LFK(0.021)EK(0.976)FEDK(0.003)	LFK(0.001)EK(0.003)FEDK(0.996)		LFK(-16.8)EK(16.8)FEDK(-25.06)	LFK(-35.12)EK(-25.06)FEDK(25.06)		A0A178UGA7	PI4KB2	Phosphatidylinositol 4-kinase beta 2	U0	69.198	29334000
LFKEKFEDK	2	Methyl (KR),Dimethyl (KR)		1	1		_LFKEK(di)FEDK(me)_	LFK(0.046)EK(0.918)FEDK(0.035)	LFK(0.02)EK(0.049)FEDK(0.931)		LFK(-14.83)EK(14.46)FEDK(-14.46)	LFK(-17.29)EK(-14.46)FEDK(14.46)		A0A178UGA7	PI4KB2	Phosphatidylinositol 4-kinase beta 2	U50	58.596	18370000
LFKEKFEDK	2	Methyl (KR),Dimethyl (KR)		1	1		_LFKEK(di)FEDK(me)_							A0A178UGA7	PI4KB2	Phosphatidylinositol 4-kinase beta 2	U50	NaN	44151000
ASAEHALSVLNGTQLGGQSIR	0	Unmodified					_ASAEHALSVLNGTQLGGQSIR_							A0A178UGM5	RBP45A	Polyadenylate-binding protein RBP45A	U0	182.82	13348000
ASAEHALSVLNGTQLGGQSIR	0	Unmodified					_ASAEHALSVLNGTQLGGQSIR_							A0A178UGM5	RBP45A	Polyadenylate-binding protein RBP45A	U50	182.86	23499000
CGFVQYANK	0	Unmodified					_CGFVQYANK_							A0A178UGM5	RBP45A	Polyadenylate-binding protein RBP45A	U0	119.89	6112600
CGFVQYANK	0	Unmodified					_CGFVQYANK_							A0A178UGM5	RBP45A	Polyadenylate-binding protein RBP45A	U50	145.88	19080000
LNWAQAGAGEKR	1	Unmodified					_LNWAQAGAGEKR_							A0A178UGM5	RBP45A	Polyadenylate-binding protein RBP45A	U0	90.697	9833800
LVFIGPPGSGK	0	Unmodified					_LVFIGPPGSGK_							A0A178UGN7	ADK2	Adenylate kinase 3	U0	80.688	5856100
LVFIGPPGSGK	0	Unmodified					_LVFIGPPGSGK_							A0A178UGN7	ADK2	Adenylate kinase 3	U50	77.192	23218000
TVTQAEKLDEMLNRR	2	Unmodified					_TVTQAEKLDEMLNRR_							A0A178UGN7	ADK2	Adenylate kinase 3	U0	NaN	3884100
TVTQAEKLDEMLNRR	2	Unmodified					_TVTQAEKLDEMLNRR_							A0A178UGN7	ADK2	Adenylate kinase 3	U50	115.06	10393000
YNNVQLDGK	0	Unmodified					_YNNVQLDGK_							A0A178UIR8	ALY2	THO complex subunit 4B	U0	125.31
STDVVDAIAR	0	Unmodified					_STDVVDAIAR_							A0A178UJ45		NADH dehydrogenase [ubiquinone] flavoprotein 1, mitochondrial	U0	114.99	4553400
LGVEDVEVDNPNAVSK	0	Unmodified					_LGVEDVEVDNPNAVSK_							A0A178UJQ9	RH7	DEAD-box ATP-dependent RNA helicase 7	U0	123.92	5759500
LGVEDVEVDNPNAVSK	0	Unmodified					_LGVEDVEVDNPNAVSK_							A0A178UJQ9	RH7	DEAD-box ATP-dependent RNA helicase 7	U50	NaN	2325100
MALDTPELDSK	0	Unmodified					_MALDTPELDSK_							A0A178UJQ9	RH7	DEAD-box ATP-dependent RNA helicase 7	U0	101.65	4257900
FLELKAKR	2	Unmodified					_FLELKAKR_							A0A178UJT7	ADF1;ADF10;ADF8;ADF4	Actin-depolymerizing factor 1;Actin-depolymerizing factor 10;Actin-depolymerizing factor 8;Actin-depolymerizing factor 4	U0	129.4	12397000
FLELKAKR	2	Unmodified					_FLELKAKR_							A0A178UJT7	ADF1;ADF10;ADF8;ADF4	Actin-depolymerizing factor 1;Actin-depolymerizing factor 10;Actin-depolymerizing factor 8;Actin-depolymerizing factor 4	U50	144.83	17620000
ANAASGMAVHDDCKLR	1	Unmodified					_ANAASGMAVHDDCKLR_							A0A178UJT7	ADF1;ADF4	Actin-depolymerizing factor 1;Actin-depolymerizing factor 4	U0	113.65	15743000
ANAASGMAVHDDCKLR	1	Acetyl (Protein N-term),Oxidation (M)	1			1	_(ac)ANAASGM(ox)AVHDDCKLR_			ANAASGM(1)AVHDDCKLR			ANAASGM(165.49)AVHDDCKLR	A0A178UJT7	ADF1;ADF4	Actin-depolymerizing factor 1;Actin-depolymerizing factor 4	U0	165.49	8433700000
ANAASGMAVHDDCKLR	1	Acetyl (Protein N-term),Oxidation (M)	1			1	_(ac)ANAASGM(ox)AVHDDCKLR_			ANAASGM(1)AVHDDCKLR			ANAASGM(252.42)AVHDDCKLR	A0A178UJT7	ADF1;ADF4	Actin-depolymerizing factor 1;Actin-depolymerizing factor 4	U0	252.42	272210000
ANAASGMAVHDDCKLR	1	Acetyl (Protein N-term),Oxidation (M)	1			1	_(ac)ANAASGM(ox)AVHDDCKLR_			ANAASGM(1)AVHDDCKLR			ANAASGM(160.56)AVHDDCKLR	A0A178UJT7	ADF1;ADF4	Actin-depolymerizing factor 1;Actin-depolymerizing factor 4	U0	160.56	6755200
ANAASGMAVHDDCKLR	1	Acetyl (Protein N-term),Oxidation (M)	1			1	_(ac)ANAASGM(ox)AVHDDCKLR_			ANAASGM(1)AVHDDCKLR			ANAASGM(120.54)AVHDDCKLR	A0A178UJT7	ADF1;ADF4	Actin-depolymerizing factor 1;Actin-depolymerizing factor 4	U0	120.54	97785000
ANAASGMAVHDDCKLR	1	Acetyl (Protein N-term),Oxidation (M)	1			1	_(ac)ANAASGM(ox)AVHDDCKLR_			ANAASGM(1)AVHDDCKLR			ANAASGM(95.58)AVHDDCKLR	A0A178UJT7	ADF1;ADF4	Actin-depolymerizing factor 1;Actin-depolymerizing factor 4	U0	95.582	78271000
ANAASGMAVHDDCKLR	1	Acetyl (Protein N-term),Oxidation (M)	1			1	_(ac)ANAASGM(ox)AVHDDCKLR_			ANAASGM(1)AVHDDCKLR			ANAASGM(204.69)AVHDDCKLR	A0A178UJT7	ADF1;ADF4	Actin-depolymerizing factor 1;Actin-depolymerizing factor 4	U0	204.69	101960000
ANAASGMAVHDDCKLR	1	Acetyl (Protein N-term),Oxidation (M)	1			1	_(ac)ANAASGM(ox)AVHDDCKLR_			ANAASGM(1)AVHDDCKLR			ANAASGM(41.09)AVHDDCKLR	A0A178UJT7	ADF1;ADF4	Actin-depolymerizing factor 1;Actin-depolymerizing factor 4	U0	41.088	4641400
ANAASGMAVHDDCKLR	1	Acetyl (Protein N-term),Oxidation (M)	1			1	_(ac)ANAASGM(ox)AVHDDCKLR_			ANAASGM(1)AVHDDCKLR			ANAASGM(84.17)AVHDDCKLR	A0A178UJT7	ADF1;ADF4	Actin-depolymerizing factor 1;Actin-depolymerizing factor 4	U0	84.169
ANAASGMAVHDDCKLR	1	Acetyl (Protein N-term),Oxidation (M),Methyl (KR)	1		1	1	_(ac)ANAASGM(ox)AVHDDCK(me)LR_		ANAASGMAVHDDCK(0.982)LR(0.018)	ANAASGM(1)AVHDDCKLR		ANAASGMAVHDDCK(17.28)LR(-17.28)	ANAASGM(167.61)AVHDDCKLR	A0A178UJT7	ADF1;ADF4	Actin-depolymerizing factor 1;Actin-depolymerizing factor 4	U0	167.61	541640000
ANAASGMAVHDDCKLR	1	Acetyl (Protein N-term),Oxidation (M),Methyl (KR)	1		1	1	_(ac)ANAASGM(ox)AVHDDCK(me)LR_		ANAASGMAVHDDCK(0.998)LR(0.002)	ANAASGM(1)AVHDDCKLR		ANAASGMAVHDDCK(26.5)LR(-26.5)	ANAASGM(221.66)AVHDDCKLR	A0A178UJT7	ADF1;ADF4	Actin-depolymerizing factor 1;Actin-depolymerizing factor 4	U0	221.66	12151000
ANAASGMAVHDDCKLR	1	Acetyl (Protein N-term),Oxidation (M),Methyl (KR)	1		1	1	_(ac)ANAASGM(ox)AVHDDCK(me)LR_		ANAASGMAVHDDCK(0.846)LR(0.154)	ANAASGM(1)AVHDDCKLR		ANAASGMAVHDDCK(7.4)LR(-7.4)	ANAASGM(75.57)AVHDDCKLR	A0A178UJT7	ADF1;ADF4	Actin-depolymerizing factor 1;Actin-depolymerizing factor 4	U0	75.574	70353000
ANAASGMAVHDDCKLR	1	Acetyl (Protein N-term),Oxidation (M),Methyl (KR)	1		1	1	_(ac)ANAASGM(ox)AVHDDCK(me)LR_		ANAASGMAVHDDCK(0.946)LR(0.054)	ANAASGM(1)AVHDDCKLR		ANAASGMAVHDDCK(12.44)LR(-12.44)	ANAASGM(121.68)AVHDDCKLR	A0A178UJT7	ADF1;ADF4	Actin-depolymerizing factor 1;Actin-depolymerizing factor 4	U0	121.68	5569500
ANAASGMAVHDDCKLR	1	Acetyl (Protein N-term)	1				_(ac)ANAASGMAVHDDCKLR_							A0A178UJT7	ADF1;ADF4	Actin-depolymerizing factor 1;Actin-depolymerizing factor 4	U0	154.69	76237000
ANAASGMAVHDDCKLR	1	Acetyl (Protein N-term)	1				_(ac)ANAASGMAVHDDCKLR_							A0A178UJT7	ADF1;ADF4	Actin-depolymerizing factor 1;Actin-depolymerizing factor 4	U0	142.83	3122400
ANAASGMAVHDDCKLR	1	Acetyl (Protein N-term)	1				_(ac)ANAASGMAVHDDCKLR_							A0A178UJT7	ADF1;ADF4	Actin-depolymerizing factor 1;Actin-depolymerizing factor 4	U0	187.37	23860000000
ANAASGMAVHDDCKLR	1	Acetyl (Protein N-term)	1				_(ac)ANAASGMAVHDDCKLR_							A0A178UJT7	ADF1;ADF4	Actin-depolymerizing factor 1;Actin-depolymerizing factor 4	U0	414.29	1461500000
ANAASGMAVHDDCKLR	1	Acetyl (Protein N-term)	1				_(ac)ANAASGMAVHDDCKLR_							A0A178UJT7	ADF1;ADF4	Actin-depolymerizing factor 1;Actin-depolymerizing factor 4	U0	340.85	14190000
ANAASGMAVHDDCKLR	1	Acetyl (Protein N-term)	1				_(ac)ANAASGMAVHDDCKLR_							A0A178UJT7	ADF1;ADF4	Actin-depolymerizing factor 1;Actin-depolymerizing factor 4	U0	130.27	41137000
ANAASGMAVHDDCKLR	1	Acetyl (Protein N-term)	1				_(ac)ANAASGMAVHDDCKLR_							A0A178UJT7	ADF1;ADF4	Actin-depolymerizing factor 1;Actin-depolymerizing factor 4	U0	80.738	7473900
ANAASGMAVHDDCKLR	1	Acetyl (Protein N-term)	1				_(ac)ANAASGMAVHDDCKLR_							A0A178UJT7	ADF1;ADF4	Actin-depolymerizing factor 1;Actin-depolymerizing factor 4	U0	56.339	4087100
ANAASGMAVHDDCKLR	1	Acetyl (Protein N-term)	1				_(ac)ANAASGMAVHDDCKLR_							A0A178UJT7	ADF1;ADF4	Actin-depolymerizing factor 1;Actin-depolymerizing factor 4	U0	136.81
ANAASGMAVHDDCKLR	1	Acetyl (Protein N-term)	1				_(ac)ANAASGMAVHDDCKLR_							A0A178UJT7	ADF1;ADF4	Actin-depolymerizing factor 1;Actin-depolymerizing factor 4	U0	NaN	10859000
ANAASGMAVHDDCKLR	1	Acetyl (Protein N-term),Methyl (KR)	1		1		_(ac)ANAASGMAVHDDCK(me)LR_		ANAASGMAVHDDCK(0.988)LR(0.012)			ANAASGMAVHDDCK(18.98)LR(-18.98)		A0A178UJT7	ADF1;ADF4	Actin-depolymerizing factor 1;Actin-depolymerizing factor 4	U0	189.1	2287300000
ANAASGMAVHDDCKLR	1	Acetyl (Protein N-term),Methyl (KR)	1		1		_(ac)ANAASGMAVHDDCK(me)LR_		ANAASGMAVHDDCK(1)LR			ANAASGMAVHDDCK(40.18)LR(-40.18)		A0A178UJT7	ADF1;ADF4	Actin-depolymerizing factor 1;Actin-depolymerizing factor 4	U0	339.87	71520000
ANAASGMAVHDDCKLR	1	Unmodified					_ANAASGMAVHDDCKLR_							A0A178UJT7	ADF1;ADF4	Actin-depolymerizing factor 1;Actin-depolymerizing factor 4	U50	66.673	10577000
ANAASGMAVHDDCKLR	1	Acetyl (Protein N-term),Oxidation (M)	1			1	_(ac)ANAASGM(ox)AVHDDCKLR_			ANAASGM(1)AVHDDCKLR			ANAASGM(171.81)AVHDDCKLR	A0A178UJT7	ADF1;ADF4	Actin-depolymerizing factor 1;Actin-depolymerizing factor 4	U50	171.81	7525400000
ANAASGMAVHDDCKLR	1	Acetyl (Protein N-term),Oxidation (M)	1			1	_(ac)ANAASGM(ox)AVHDDCKLR_			ANAASGM(1)AVHDDCKLR			ANAASGM(254.01)AVHDDCKLR	A0A178UJT7	ADF1;ADF4	Actin-depolymerizing factor 1;Actin-depolymerizing factor 4	U50	254.01	222620000
ANAASGMAVHDDCKLR	1	Acetyl (Protein N-term),Oxidation (M)	1			1	_(ac)ANAASGM(ox)AVHDDCKLR_			ANAASGM(1)AVHDDCKLR			ANAASGM(109.48)AVHDDCKLR	A0A178UJT7	ADF1;ADF4	Actin-depolymerizing factor 1;Actin-depolymerizing factor 4	U50	109.48	69223000
ANAASGMAVHDDCKLR	1	Acetyl (Protein N-term),Oxidation (M)	1			1	_(ac)ANAASGM(ox)AVHDDCKLR_			ANAASGM(1)AVHDDCKLR			ANAASGM(57.5)AVHDDCKLR	A0A178UJT7	ADF1;ADF4	Actin-depolymerizing factor 1;Actin-depolymerizing factor 4	U50	57.499	6882700
ANAASGMAVHDDCKLR	1	Acetyl (Protein N-term),Oxidation (M)	1			1	_(ac)ANAASGM(ox)AVHDDCKLR_			ANAASGM(1)AVHDDCKLR			ANAASGM(214.26)AVHDDCKLR	A0A178UJT7	ADF1;ADF4	Actin-depolymerizing factor 1;Actin-depolymerizing factor 4	U50	214.26	85239000
ANAASGMAVHDDCKLR	1	Acetyl (Protein N-term),Oxidation (M)	1			1	_(ac)ANAASGM(ox)AVHDDCKLR_							A0A178UJT7	ADF1;ADF4	Actin-depolymerizing factor 1;Actin-depolymerizing factor 4	U50	NaN	57927000
ANAASGMAVHDDCKLR	1	Acetyl (Protein N-term),Oxidation (M)	1			1	_(ac)ANAASGM(ox)AVHDDCKLR_							A0A178UJT7	ADF1;ADF4	Actin-depolymerizing factor 1;Actin-depolymerizing factor 4	U50	NaN	2931700
ANAASGMAVHDDCKLR	1	Acetyl (Protein N-term),Oxidation (M),Methyl (KR)	1		1	1	_(ac)ANAASGM(ox)AVHDDCK(me)LR_		ANAASGMAVHDDCK(0.965)LR(0.035)	ANAASGM(1)AVHDDCKLR		ANAASGMAVHDDCK(14.37)LR(-14.37)	ANAASGM(130.95)AVHDDCKLR	A0A178UJT7	ADF1;ADF4	Actin-depolymerizing factor 1;Actin-depolymerizing factor 4	U50	130.95	263560000
ANAASGMAVHDDCKLR	1	Acetyl (Protein N-term),Oxidation (M),Methyl (KR)	1		1	1	_(ac)ANAASGM(ox)AVHDDCK(me)LR_		ANAASGMAVHDDCK(0.999)LR(0.001)	ANAASGM(1)AVHDDCKLR		ANAASGMAVHDDCK(28.36)LR(-28.36)	ANAASGM(194.98)AVHDDCKLR	A0A178UJT7	ADF1;ADF4	Actin-depolymerizing factor 1;Actin-depolymerizing factor 4	U50	194.98	4804800
ANAASGMAVHDDCKLR	1	Acetyl (Protein N-term)	1				_(ac)ANAASGMAVHDDCKLR_							A0A178UJT7	ADF1;ADF4	Actin-depolymerizing factor 1;Actin-depolymerizing factor 4	U50	145.86	54155000
ANAASGMAVHDDCKLR	1	Acetyl (Protein N-term)	1				_(ac)ANAASGMAVHDDCKLR_							A0A178UJT7	ADF1;ADF4	Actin-depolymerizing factor 1;Actin-depolymerizing factor 4	U50	165.86	18765000000
ANAASGMAVHDDCKLR	1	Acetyl (Protein N-term)	1				_(ac)ANAASGMAVHDDCKLR_							A0A178UJT7	ADF1;ADF4	Actin-depolymerizing factor 1;Actin-depolymerizing factor 4	U50	362.59	1004500000
ANAASGMAVHDDCKLR	1	Acetyl (Protein N-term)	1				_(ac)ANAASGMAVHDDCKLR_							A0A178UJT7	ADF1;ADF4	Actin-depolymerizing factor 1;Actin-depolymerizing factor 4	U50	109.35	16938000
ANAASGMAVHDDCKLR	1	Acetyl (Protein N-term)	1				_(ac)ANAASGMAVHDDCKLR_							A0A178UJT7	ADF1;ADF4	Actin-depolymerizing factor 1;Actin-depolymerizing factor 4	U50	65.477	6444000
ANAASGMAVHDDCKLR	1	Acetyl (Protein N-term)	1				_(ac)ANAASGMAVHDDCKLR_							A0A178UJT7	ADF1;ADF4	Actin-depolymerizing factor 1;Actin-depolymerizing factor 4	U50	45.618	8952800
ANAASGMAVHDDCKLR	1	Acetyl (Protein N-term)	1				_(ac)ANAASGMAVHDDCKLR_							A0A178UJT7	ADF1;ADF4	Actin-depolymerizing factor 1;Actin-depolymerizing factor 4	U50	51.495	4909800
ANAASGMAVHDDCKLR	1	Acetyl (Protein N-term)	1				_(ac)ANAASGMAVHDDCKLR_							A0A178UJT7	ADF1;ADF4	Actin-depolymerizing factor 1;Actin-depolymerizing factor 4	U50	76.82	5957700
ANAASGMAVHDDCKLR	1	Acetyl (Protein N-term)	1				_(ac)ANAASGMAVHDDCKLR_							A0A178UJT7	ADF1;ADF4	Actin-depolymerizing factor 1;Actin-depolymerizing factor 4	U50	155.08
ANAASGMAVHDDCKLR	1	Acetyl (Protein N-term)	1				_(ac)ANAASGMAVHDDCKLR_							A0A178UJT7	ADF1;ADF4	Actin-depolymerizing factor 1;Actin-depolymerizing factor 4	U50	NaN	2432900
ANAASGMAVHDDCKLR	1	Acetyl (Protein N-term)	1				_(ac)ANAASGMAVHDDCKLR_							A0A178UJT7	ADF1;ADF4	Actin-depolymerizing factor 1;Actin-depolymerizing factor 4	U50	NaN	3222800
ANAASGMAVHDDCKLR	1	Acetyl (Protein N-term),Methyl (KR)	1		1		_(ac)ANAASGMAVHDDCK(me)LR_		ANAASGMAVHDDCK(0.95)LR(0.05)			ANAASGMAVHDDCK(12.78)LR(-12.78)		A0A178UJT7	ADF1;ADF4	Actin-depolymerizing factor 1;Actin-depolymerizing factor 4	U50	189.1	908700000
ANAASGMAVHDDCKLRFLELK	2	Acetyl (Protein N-term)	1				_(ac)ANAASGMAVHDDCKLRFLELK_							A0A178UJT7	ADF1;ADF4	Actin-depolymerizing factor 1;Actin-depolymerizing factor 4	U0	NaN	1855600
ANAASGMAVHDDCKLRFLELK	2	Acetyl (Protein N-term),Oxidation (M)	1			1	_(ac)ANAASGM(ox)AVHDDCKLRFLELK_			ANAASGM(1)AVHDDCKLRFLELK			ANAASGM(65.45)AVHDDCKLRFLELK	A0A178UJT7	ADF1;ADF4	Actin-depolymerizing factor 1;Actin-depolymerizing factor 4	U50	65.454	18044000
ANAASGMAVHDDCKLRFLELK	2	Acetyl (Protein N-term)	1				_(ac)ANAASGMAVHDDCKLRFLELK_							A0A178UJT7	ADF1;ADF4	Actin-depolymerizing factor 1;Actin-depolymerizing factor 4	U50	91.276	20136000
FIVYKIEEK	1	Unmodified					_FIVYKIEEK_							A0A178UJT7	ADF1;ADF4	Actin-depolymerizing factor 1;Actin-depolymerizing factor 4	U0	186.3	7229000000
FIVYKIEEK	1	Unmodified					_FIVYKIEEK_							A0A178UJT7	ADF1;ADF4	Actin-depolymerizing factor 1;Actin-depolymerizing factor 4	U0	121.85	13216000
FIVYKIEEK	1	Unmodified					_FIVYKIEEK_							A0A178UJT7	ADF1;ADF4	Actin-depolymerizing factor 1;Actin-depolymerizing factor 4	U0	51.662
FIVYKIEEK	1	Unmodified					_FIVYKIEEK_							A0A178UJT7	ADF1;ADF4	Actin-depolymerizing factor 1;Actin-depolymerizing factor 4	U0	45.7
FIVYKIEEK	1	Unmodified					_FIVYKIEEK_							A0A178UJT7	ADF1;ADF4	Actin-depolymerizing factor 1;Actin-depolymerizing factor 4	U50	171.73	4230000000
FIVYKIEEK	1	Unmodified					_FIVYKIEEK_							A0A178UJT7	ADF1;ADF4	Actin-depolymerizing factor 1;Actin-depolymerizing factor 4	U50	NaN	5339600
FIVYKIEEKQK	2	Unmodified					_FIVYKIEEKQK_							A0A178UJT7	ADF1;ADF4	Actin-depolymerizing factor 1;Actin-depolymerizing factor 4	U0	235.32	317390000
FIVYKIEEKQK	2	Unmodified					_FIVYKIEEKQK_							A0A178UJT7	ADF1;ADF4	Actin-depolymerizing factor 1;Actin-depolymerizing factor 4	U0	118.23	2792200000
FIVYKIEEKQK	2	Unmodified					_FIVYKIEEKQK_							A0A178UJT7	ADF1;ADF4	Actin-depolymerizing factor 1;Actin-depolymerizing factor 4	U0	76.843	9689900
FIVYKIEEKQK	2	Unmodified					_FIVYKIEEKQK_							A0A178UJT7	ADF1;ADF4	Actin-depolymerizing factor 1;Actin-depolymerizing factor 4	U0	27.431	1393100
FIVYKIEEKQK	2	Unmodified					_FIVYKIEEKQK_							A0A178UJT7	ADF1;ADF4	Actin-depolymerizing factor 1;Actin-depolymerizing factor 4	U0	NaN	3673700
FIVYKIEEKQK	2	Unmodified					_FIVYKIEEKQK_							A0A178UJT7	ADF1;ADF4	Actin-depolymerizing factor 1;Actin-depolymerizing factor 4	U50	213.8	292820000
FIVYKIEEKQK	2	Unmodified					_FIVYKIEEKQK_							A0A178UJT7	ADF1;ADF4	Actin-depolymerizing factor 1;Actin-depolymerizing factor 4	U50	132.25	2824100000
FIVYKIEEKQK	2	Unmodified					_FIVYKIEEKQK_							A0A178UJT7	ADF1;ADF4	Actin-depolymerizing factor 1;Actin-depolymerizing factor 4	U50	36.284	8927500
FIVYKIEEKQK	2	Unmodified					_FIVYKIEEKQK_							A0A178UJT7	ADF1;ADF4	Actin-depolymerizing factor 1;Actin-depolymerizing factor 4	U50	29.303	3225700
LRFLELK	1	Unmodified					_LRFLELK_							A0A178UJT7	ADF1;ADF4	Actin-depolymerizing factor 1;Actin-depolymerizing factor 4	U0	173.85	80275000
LRFLELK	1	Unmodified					_LRFLELK_							A0A178UJT7	ADF1;ADF4	Actin-depolymerizing factor 1;Actin-depolymerizing factor 4	U50	157.99	50422000
RTHRFIVYK	2	Unmodified					_RTHRFIVYK_							A0A178UJT7	ADF1;ADF4	Actin-depolymerizing factor 1;Actin-depolymerizing factor 4	U0	NaN	1308200
RTHRFIVYK	2	Unmodified					_RTHRFIVYK_							A0A178UJT7	ADF1;ADF4	Actin-depolymerizing factor 1;Actin-depolymerizing factor 4	U50	43.492	2062400
THRFIVYKIEEK	2	Unmodified					_THRFIVYKIEEK_							A0A178UJT7	ADF1;ADF4	Actin-depolymerizing factor 1;Actin-depolymerizing factor 4	U0	164.56	391760000
THRFIVYKIEEK	2	Unmodified					_THRFIVYKIEEK_							A0A178UJT7	ADF1;ADF4	Actin-depolymerizing factor 1;Actin-depolymerizing factor 4	U0	218.75	41974000
THRFIVYKIEEK	2	Unmodified					_THRFIVYKIEEK_							A0A178UJT7	ADF1;ADF4	Actin-depolymerizing factor 1;Actin-depolymerizing factor 4	U0	124.6	2978800
THRFIVYKIEEK	2	Unmodified					_THRFIVYKIEEK_							A0A178UJT7	ADF1;ADF4	Actin-depolymerizing factor 1;Actin-depolymerizing factor 4	U0	103.83	12414000
THRFIVYKIEEK	2	Unmodified					_THRFIVYKIEEK_							A0A178UJT7	ADF1;ADF4	Actin-depolymerizing factor 1;Actin-depolymerizing factor 4	U50	171.73	502720000
THRFIVYKIEEK	2	Unmodified					_THRFIVYKIEEK_							A0A178UJT7	ADF1;ADF4	Actin-depolymerizing factor 1;Actin-depolymerizing factor 4	U50	234.63	52312000
THRFIVYKIEEK	2	Unmodified					_THRFIVYKIEEK_							A0A178UJT7	ADF1;ADF4	Actin-depolymerizing factor 1;Actin-depolymerizing factor 4	U50	58.32	11620000
YAIYDFDFVTAENCQK	0	Unmodified					_YAIYDFDFVTAENCQK_							A0A178UJT7	ADF1;ADF4	Actin-depolymerizing factor 1;Actin-depolymerizing factor 4	U0	306.48	337080000
YAIYDFDFVTAENCQK	0	Unmodified					_YAIYDFDFVTAENCQK_							A0A178UJT7	ADF1;ADF4	Actin-depolymerizing factor 1;Actin-depolymerizing factor 4	U0	177.21	94966000
YAIYDFDFVTAENCQK	0	Methyl (KR)			1		_YAIYDFDFVTAENCQK(me)_		YAIYDFDFVTAENCQK(1)			YAIYDFDFVTAENCQK(257.72)		A0A178UJT7	ADF1;ADF4	Actin-depolymerizing factor 1;Actin-depolymerizing factor 4	U0	257.72	19632000
YAIYDFDFVTAENCQK	0	Unmodified					_YAIYDFDFVTAENCQK_							A0A178UJT7	ADF1;ADF4	Actin-depolymerizing factor 1;Actin-depolymerizing factor 4	U50	306.58	2035200000
YAIYDFDFVTAENCQK	0	Unmodified					_YAIYDFDFVTAENCQK_							A0A178UJT7	ADF1;ADF4	Actin-depolymerizing factor 1;Actin-depolymerizing factor 4	U50	164.88	602940000
YAIYDFDFVTAENCQK	0	Unmodified					_YAIYDFDFVTAENCQK_							A0A178UJT7	ADF1;ADF4	Actin-depolymerizing factor 1;Actin-depolymerizing factor 4	U50	80.69
YAIYDFDFVTAENCQK	0	Unmodified					_YAIYDFDFVTAENCQK_							A0A178UJT7	ADF1;ADF4	Actin-depolymerizing factor 1;Actin-depolymerizing factor 4	U50	NaN	2439800
YAIYDFDFVTAENCQK	0	Methyl (KR)			1		_YAIYDFDFVTAENCQK(me)_		YAIYDFDFVTAENCQK(1)			YAIYDFDFVTAENCQK(265.36)		A0A178UJT7	ADF1;ADF4	Actin-depolymerizing factor 1;Actin-depolymerizing factor 4	U50	265.36	99326000
YAIYDFDFVTAENCQKSK	1	Unmodified					_YAIYDFDFVTAENCQKSK_							A0A178UJT7	ADF1;ADF4	Actin-depolymerizing factor 1;Actin-depolymerizing factor 4	U0	152.68	42253000
YAIYDFDFVTAENCQKSK	1	Unmodified					_YAIYDFDFVTAENCQKSK_							A0A178UJT7	ADF1;ADF4	Actin-depolymerizing factor 1;Actin-depolymerizing factor 4	U50	NaN	248690000
ELDGIQVELQATDPTEMDLDVLK	0	Oxidation (M)				1	_ELDGIQVELQATDPTEM(ox)DLDVLK_			ELDGIQVELQATDPTEM(1)DLDVLK			ELDGIQVELQATDPTEM(99.41)DLDVLK	A0A178UJT7	ADF4	Actin-depolymerizing factor 4	U0	99.414	15757000
ELDGIQVELQATDPTEMDLDVLK	0	Oxidation (M)				1	_ELDGIQVELQATDPTEM(ox)DLDVLK_			ELDGIQVELQATDPTEM(1)DLDVLK			ELDGIQVELQATDPTEM(80.63)DLDVLK	A0A178UJT7	ADF4	Actin-depolymerizing factor 4	U0	80.632	7065700
ELDGIQVELQATDPTEMDLDVLK	0	Oxidation (M)				1	_ELDGIQVELQATDPTEM(ox)DLDVLK_			ELDGIQVELQATDPTEM(1)DLDVLK			ELDGIQVELQATDPTEM(142.93)DLDVLK	A0A178UJT7	ADF4	Actin-depolymerizing factor 4	U50	142.93	53240000
ELDGIQVELQATDPTEMDLDVLK	0	Oxidation (M)				1	_ELDGIQVELQATDPTEM(ox)DLDVLK_			ELDGIQVELQATDPTEM(1)DLDVLK			ELDGIQVELQATDPTEM(181.81)DLDVLK	A0A178UJT7	ADF4	Actin-depolymerizing factor 4	U50	181.81	29642000
ELDGIQVELQATDPTEMDLDVLKSR	1	Oxidation (M)				1	_ELDGIQVELQATDPTEM(ox)DLDVLKSR_			ELDGIQVELQATDPTEM(1)DLDVLKSR			ELDGIQVELQATDPTEM(139.47)DLDVLKSR	A0A178UJT7	ADF4	Actin-depolymerizing factor 4	U50	139.47	25505000
ELDGIQVELQATDPTEMDLDVLKSR	1	Unmodified					_ELDGIQVELQATDPTEMDLDVLKSR_							A0A178UJT7	ADF4	Actin-depolymerizing factor 4	U50	238.03	33302000
IEEKQKQVIVEK	2	Unmodified					_IEEKQKQVIVEK_							A0A178UJT7	ADF4	Actin-depolymerizing factor 4	U0	161.48	2292800
IEEKQKQVIVEK	2	Unmodified					_IEEKQKQVIVEK_							A0A178UJT7	ADF4	Actin-depolymerizing factor 4	U50	137.62	2143000
IFFIAWCPDVAK	0	Unmodified					_IFFIAWCPDVAK_							A0A178UJT7	ADF4	Actin-depolymerizing factor 4	U0	NaN	116790000
IFFIAWCPDVAK	0	Unmodified					_IFFIAWCPDVAK_							A0A178UJT7	ADF4	Actin-depolymerizing factor 4	U50	84.054	418990000
QKQVIVEKVGEPILTYEDFAASLPADECR	2	Unmodified					_QKQVIVEKVGEPILTYEDFAASLPADECR_							A0A178UJT7	ADF4	Actin-depolymerizing factor 4	U50	163.39	33775000
QVIVEKVGEPILTYEDFAASLPADECR	1	Unmodified					_QVIVEKVGEPILTYEDFAASLPADECR_							A0A178UJT7	ADF4	Actin-depolymerizing factor 4	U0	172.67	37894000
QVIVEKVGEPILTYEDFAASLPADECR	1	Unmodified					_QVIVEKVGEPILTYEDFAASLPADECR_							A0A178UJT7	ADF4	Actin-depolymerizing factor 4	U50	184.03	191050000
SKIFFIAWCPDVAK	1	Unmodified					_SKIFFIAWCPDVAK_							A0A178UJT7	ADF4	Actin-depolymerizing factor 4	U0	88.768	271890000
SKIFFIAWCPDVAK	1	Unmodified					_SKIFFIAWCPDVAK_							A0A178UJT7	ADF4	Actin-depolymerizing factor 4	U0	137.62	72347000
SKIFFIAWCPDVAK	1	Unmodified					_SKIFFIAWCPDVAK_							A0A178UJT7	ADF4	Actin-depolymerizing factor 4	U50	70.134	690560000
SKIFFIAWCPDVAK	1	Unmodified					_SKIFFIAWCPDVAK_							A0A178UJT7	ADF4	Actin-depolymerizing factor 4	U50	139.7	267490000
SKIFFIAWCPDVAKVR	2	Unmodified					_SKIFFIAWCPDVAKVR_							A0A178UJT7	ADF4	Actin-depolymerizing factor 4	U50	76.795	40845000
SKIFFIAWCPDVAKVR	2	Unmodified					_SKIFFIAWCPDVAKVR_							A0A178UJT7	ADF4	Actin-depolymerizing factor 4	U50	57.173	25556000
VGEPILTYEDFAASLPADECR	0	Unmodified					_VGEPILTYEDFAASLPADECR_							A0A178UJT7	ADF4	Actin-depolymerizing factor 4	U0	89.659	25107000
VGEPILTYEDFAASLPADECR	0	Unmodified					_VGEPILTYEDFAASLPADECR_							A0A178UJT7	ADF4	Actin-depolymerizing factor 4	U0	NaN	18085000
VGEPILTYEDFAASLPADECR	0	Unmodified					_VGEPILTYEDFAASLPADECR_							A0A178UJT7	ADF4	Actin-depolymerizing factor 4	U50	161.51	234600000
VGEPILTYEDFAASLPADECR	0	Unmodified					_VGEPILTYEDFAASLPADECR_							A0A178UJT7	ADF4	Actin-depolymerizing factor 4	U50	309.23	148350000
VGEPILTYEDFAASLPADECR	0	Unmodified					_VGEPILTYEDFAASLPADECR_							A0A178UJT7	ADF4	Actin-depolymerizing factor 4	U50	109.83
SVADEAGMVLQAK	0	Unmodified					_SVADEAGMVLQAK_							A0A178UJZ9		Probable prefoldin subunit 5	U0	107.24	3207400
GEIGKVSGIPEEHLSR	1	Unmodified					_GEIGKVSGIPEEHLSR_							A0A178UKD2	FRO1	NADH dehydrogenase [ubiquinone] iron-sulfur protein 4, mitochondrial	U0	66.977	14758000
KVIIYSPAR	1	Unmodified					_KVIIYSPAR_							A0A178UKD2	FRO1	NADH dehydrogenase [ubiquinone] iron-sulfur protein 4, mitochondrial	U0	57.722	24650000
KVIIYSPAR	1	Unmodified					_KVIIYSPAR_							A0A178UKD2	FRO1	NADH dehydrogenase [ubiquinone] iron-sulfur protein 4, mitochondrial	U50	NaN	3483600
RGEIGKVSGIPEEHLSR	2	Unmodified					_RGEIGKVSGIPEEHLSR_							A0A178UKD2	FRO1	NADH dehydrogenase [ubiquinone] iron-sulfur protein 4, mitochondrial	U0	47.082	10307000
VIIYSPAR	0	Unmodified					_VIIYSPAR_							A0A178UKD2	FRO1	NADH dehydrogenase [ubiquinone] iron-sulfur protein 4, mitochondrial	U0	120.49	25724000
VIIYSPAR	0	Unmodified					_VIIYSPAR_							A0A178UKD2	FRO1	NADH dehydrogenase [ubiquinone] iron-sulfur protein 4, mitochondrial	U50	NaN	4371200
VSGIPEEHLSR	0	Unmodified					_VSGIPEEHLSR_							A0A178UKD2	FRO1	NADH dehydrogenase [ubiquinone] iron-sulfur protein 4, mitochondrial	U0	89.805	53496000
VSGIPEEHLSR	0	Unmodified					_VSGIPEEHLSR_							A0A178UKD2	FRO1	NADH dehydrogenase [ubiquinone] iron-sulfur protein 4, mitochondrial	U0	102.06	5854500
VSGIPEEHLSR	0	Unmodified					_VSGIPEEHLSR_							A0A178UKD2	FRO1	NADH dehydrogenase [ubiquinone] iron-sulfur protein 4, mitochondrial	U50	77.062	6753400
ELSEWQVNPPTGFK	0	Unmodified					_ELSEWQVNPPTGFK_							A0A178UKG2	UBC18	Probable ubiquitin-conjugating enzyme E2 18	U0	158.56	7701100
ELSEWQVNPPTGFK	0	Unmodified					_ELSEWQVNPPTGFK_							A0A178UKG2	UBC18	Probable ubiquitin-conjugating enzyme E2 18	U50	131.42	6876700
VQGPTTTTTISHAPR	0	Unmodified					_VQGPTTTTTISHAPR_							A0A178UKL8	ERF113	Ethylene-responsive transcription factor ERF113	U0	82.663	5190300
VQGPTTTTTISHAPR	0	Unmodified					_VQGPTTTTTISHAPR_							A0A178UKL8	ERF113	Ethylene-responsive transcription factor ERF113	U50	98.682	7281000
LNLGVGAYR	0	Unmodified					_LNLGVGAYR_							A0A178UKY4	ASP3;ASP5;At4g31990	Aspartate aminotransferase 3, chloroplastic;Aspartate aminotransferase;Aspartate aminotransferase, chloroplastic	U0	189.31	68325000
LNLGVGAYR	0	Unmodified					_LNLGVGAYR_							A0A178UKY4	ASP3;ASP5;At4g31990	Aspartate aminotransferase 3, chloroplastic;Aspartate aminotransferase;Aspartate aminotransferase, chloroplastic	U50	NaN	1321900
SALIAHFQNSSLMNEDKR	1	Unmodified					_SALIAHFQNSSLMNEDKR_							A0A178UM13	ML4	Protein MEI2-like 4	U0	NaN	978350
SALIAHFQNSSLMNEDKR	1	Unmodified					_SALIAHFQNSSLMNEDKR_							A0A178UM13	ML4	Protein MEI2-like 4	U50	109.72	2439500
VASLAYGR	0	Unmodified					_VASLAYGR_							A0A178UM13	ML4	Protein MEI2-like 4	U50	139.27
QSVQHEEYKVHAYNR	1	Unmodified					_QSVQHEEYKVHAYNR_							A0A178UM80	YKT61	VAMP-like protein YKT61	U0	NaN	3267300
QSVQHEEYKVHAYNR	1	Unmodified					_QSVQHEEYKVHAYNR_							A0A178UM80	YKT61	VAMP-like protein YKT61	U50	63.894	5609200
ELDETKIILHK	1	Unmodified					_ELDETKIILHK_							A0A178UM80	YKT61;YKT62	VAMP-like protein YKT61;VAMP-like protein YKT62	U50	46.73	5050000
IQRELDETKIILHK	2	Unmodified					_IQRELDETKIILHK_							A0A178UM80	YKT61;YKT62	VAMP-like protein YKT61;VAMP-like protein YKT62	U50	47.301	4605000
GATIDYEEELIR	0	Unmodified					_GATIDYEEELIR_							A0A178UMC4		Iron-sulfur assembly protein IscA-like 2, mitochondrial	U0	158.57	13671000
LVVDNVSYDLVK	0	Unmodified					_LVVDNVSYDLVK_							A0A178UMC4		Iron-sulfur assembly protein IscA-like 2, mitochondrial	U0	148.56	20315000
LVVDNVSYDLVK	0	Unmodified					_LVVDNVSYDLVK_							A0A178UMC4		Iron-sulfur assembly protein IscA-like 2, mitochondrial	U50	NaN	1206900
TNPDDRVFEK	1	Unmodified					_TNPDDRVFEK_							A0A178UMC4		Iron-sulfur assembly protein IscA-like 2, mitochondrial	U0	45.433	4661800
ALCTGEKGFGYK	1	Unmodified					_ALCTGEKGFGYK_							A0A178UN74	PNSL5	Photosynthetic NDH subunit of lumenal location 5, chloroplastic	U0	NaN	8804300
ALCTGEKGFGYK	1	Unmodified					_ALCTGEKGFGYK_							A0A178UN74	PNSL5	Photosynthetic NDH subunit of lumenal location 5, chloroplastic	U50	124.42	15671000
ALCTGEKGFGYKGSTFHR	2	Unmodified					_ALCTGEKGFGYKGSTFHR_							A0A178UN74	PNSL5	Photosynthetic NDH subunit of lumenal location 5, chloroplastic	U0	NaN	2485000
ALCTGEKGFGYKGSTFHR	2	Unmodified					_ALCTGEKGFGYKGSTFHR_							A0A178UN74	PNSL5	Photosynthetic NDH subunit of lumenal location 5, chloroplastic	U50	151.62	11509000
GFGYKGSTFHR	1	Unmodified					_GFGYKGSTFHR_							A0A178UN74	PNSL5	Photosynthetic NDH subunit of lumenal location 5, chloroplastic	U0	NaN	7908500
GFGYKGSTFHR	1	Unmodified					_GFGYKGSTFHR_							A0A178UN74	PNSL5	Photosynthetic NDH subunit of lumenal location 5, chloroplastic	U50	40.714	16255000
HVVFGQVIEGMEVVK	0	Oxidation (M)				1	_HVVFGQVIEGM(ox)EVVK_			HVVFGQVIEGM(1)EVVK			HVVFGQVIEGM(52.5)EVVK	A0A178UN74	PNSL5	Photosynthetic NDH subunit of lumenal location 5, chloroplastic	U0	52.5	3677500
HVVFGQVIEGMEVVK	0	Unmodified					_HVVFGQVIEGMEVVK_							A0A178UN74	PNSL5	Photosynthetic NDH subunit of lumenal location 5, chloroplastic	U0	65.956	17672000
HVVFGQVIEGMEVVK	0	Unmodified					_HVVFGQVIEGMEVVK_							A0A178UN74	PNSL5	Photosynthetic NDH subunit of lumenal location 5, chloroplastic	U0	124.47	4400900
HVVFGQVIEGMEVVK	0	Oxidation (M)				1	_HVVFGQVIEGM(ox)EVVK_							A0A178UN74	PNSL5	Photosynthetic NDH subunit of lumenal location 5, chloroplastic	U50	NaN	4394900
HVVFGQVIEGMEVVK	0	Unmodified					_HVVFGQVIEGMEVVK_							A0A178UN74	PNSL5	Photosynthetic NDH subunit of lumenal location 5, chloroplastic	U50	58.32	14093000
HVVFGQVIEGMEVVK	0	Unmodified					_HVVFGQVIEGMEVVK_							A0A178UN74	PNSL5	Photosynthetic NDH subunit of lumenal location 5, chloroplastic	U50	NaN	5717000
ITHKVYFDISVGNPVGK	1	Unmodified					_ITHKVYFDISVGNPVGK_							A0A178UN74	PNSL5	Photosynthetic NDH subunit of lumenal location 5, chloroplastic	U0	30.956	2330700
ITHKVYFDISVGNPVGK	1	Unmodified					_ITHKVYFDISVGNPVGK_							A0A178UN74	PNSL5	Photosynthetic NDH subunit of lumenal location 5, chloroplastic	U0	NaN	2252800
ITHKVYFDISVGNPVGK	1	Unmodified					_ITHKVYFDISVGNPVGK_							A0A178UN74	PNSL5	Photosynthetic NDH subunit of lumenal location 5, chloroplastic	U50	26.146	2244000
ITHKVYFDISVGNPVGK	1	Unmodified					_ITHKVYFDISVGNPVGK_							A0A178UN74	PNSL5	Photosynthetic NDH subunit of lumenal location 5, chloroplastic	U50	NaN	3282700
IVIGLYGDDVPQTVENFR	0	Unmodified					_IVIGLYGDDVPQTVENFR_							A0A178UN74	PNSL5	Photosynthetic NDH subunit of lumenal location 5, chloroplastic	U0	225.23	31373000
IVIGLYGDDVPQTVENFR	0	Unmodified					_IVIGLYGDDVPQTVENFR_							A0A178UN74	PNSL5	Photosynthetic NDH subunit of lumenal location 5, chloroplastic	U0	112.5	28341000
IVIGLYGDDVPQTVENFR	0	Unmodified					_IVIGLYGDDVPQTVENFR_							A0A178UN74	PNSL5	Photosynthetic NDH subunit of lumenal location 5, chloroplastic	U50	263.44	26023000
IVIGLYGDDVPQTVENFR	0	Unmodified					_IVIGLYGDDVPQTVENFR_							A0A178UN74	PNSL5	Photosynthetic NDH subunit of lumenal location 5, chloroplastic	U50	NaN	27139000
LIEEQETDR	0	Unmodified					_LIEEQETDR_							A0A178UN74	PNSL5	Photosynthetic NDH subunit of lumenal location 5, chloroplastic	U50	82.452
LIEEQETDRGDRPR	2	Unmodified					_LIEEQETDRGDRPR_							A0A178UN74	PNSL5	Photosynthetic NDH subunit of lumenal location 5, chloroplastic	U0	151.54	18004000
LIEEQETDRGDRPR	2	Unmodified					_LIEEQETDRGDRPR_							A0A178UN74	PNSL5	Photosynthetic NDH subunit of lumenal location 5, chloroplastic	U0	132.47	32004000
LIEEQETDRGDRPR	2	Unmodified					_LIEEQETDRGDRPR_							A0A178UN74	PNSL5	Photosynthetic NDH subunit of lumenal location 5, chloroplastic	U50	145.17	104600000
LIEEQETDRGDRPR	2	Unmodified					_LIEEQETDRGDRPR_							A0A178UN74	PNSL5	Photosynthetic NDH subunit of lumenal location 5, chloroplastic	U50	142.85	51571000
TSWLDGR	0	Unmodified					_TSWLDGR_							A0A178UN74	PNSL5	Photosynthetic NDH subunit of lumenal location 5, chloroplastic	U0	109.63	26017000
TSWLDGR	0	Unmodified					_TSWLDGR_							A0A178UN74	PNSL5	Photosynthetic NDH subunit of lumenal location 5, chloroplastic	U50	103.02	34088000
VIRDFMIQGGDFEK	1	Oxidation (M)				1	_VIRDFM(ox)IQGGDFEK_			VIRDFM(1)IQGGDFEK			VIRDFM(63.75)IQGGDFEK	A0A178UN74	PNSL5	Photosynthetic NDH subunit of lumenal location 5, chloroplastic	U0	63.754	12916000
VIRDFMIQGGDFEK	1	Unmodified					_VIRDFMIQGGDFEK_							A0A178UN74	PNSL5	Photosynthetic NDH subunit of lumenal location 5, chloroplastic	U0	47.639	38809000
VIRDFMIQGGDFEK	1	Unmodified					_VIRDFMIQGGDFEK_							A0A178UN74	PNSL5	Photosynthetic NDH subunit of lumenal location 5, chloroplastic	U0	152.16	4325800
VIRDFMIQGGDFEK	1	Oxidation (M)				1	_VIRDFM(ox)IQGGDFEK_			VIRDFM(1)IQGGDFEK			VIRDFM(73.72)IQGGDFEK	A0A178UN74	PNSL5	Photosynthetic NDH subunit of lumenal location 5, chloroplastic	U50	73.722	18433000
VIRDFMIQGGDFEK	1	Unmodified					_VIRDFMIQGGDFEK_							A0A178UN74	PNSL5	Photosynthetic NDH subunit of lumenal location 5, chloroplastic	U50	85.909	42419000
VIRDFMIQGGDFEK	1	Unmodified					_VIRDFMIQGGDFEK_							A0A178UN74	PNSL5	Photosynthetic NDH subunit of lumenal location 5, chloroplastic	U50	211.38	5468900
VIRDFMIQGGDFEKGNGTGGK	2	Unmodified					_VIRDFMIQGGDFEKGNGTGGK_							A0A178UN74	PNSL5	Photosynthetic NDH subunit of lumenal location 5, chloroplastic	U0	57.746	13748000
VIRDFMIQGGDFEKGNGTGGK	2	Unmodified					_VIRDFMIQGGDFEKGNGTGGK_							A0A178UN74	PNSL5	Photosynthetic NDH subunit of lumenal location 5, chloroplastic	U0	NaN	4094500
VIRDFMIQGGDFEKGNGTGGK	2	Unmodified					_VIRDFMIQGGDFEKGNGTGGK_							A0A178UN74	PNSL5	Photosynthetic NDH subunit of lumenal location 5, chloroplastic	U50	83.395	14299000
VIRDFMIQGGDFEKGNGTGGK	2	Unmodified					_VIRDFMIQGGDFEKGNGTGGK_							A0A178UN74	PNSL5	Photosynthetic NDH subunit of lumenal location 5, chloroplastic	U50	38.161	6202300
VVIADCGQLPMSEA	0	Unmodified					_VVIADCGQLPMSEA_							A0A178UN74	PNSL5	Photosynthetic NDH subunit of lumenal location 5, chloroplastic	U0	NaN	5570300
VVIADCGQLPMSEA	0	Unmodified					_VVIADCGQLPMSEA_							A0A178UN74	PNSL5	Photosynthetic NDH subunit of lumenal location 5, chloroplastic	U50	112.8	15210000
VVIADCGQLPMSEA	0	Oxidation (M)				1	_VVIADCGQLPM(ox)SEA_			VVIADCGQLPM(1)SEA			VVIADCGQLPM(47.56)SEA	A0A178UN74	PNSL5	Photosynthetic NDH subunit of lumenal location 5, chloroplastic	U50	47.561	12829000
VYFDISVGNPVGK	0	Unmodified					_VYFDISVGNPVGK_							A0A178UN74	PNSL5	Photosynthetic NDH subunit of lumenal location 5, chloroplastic	U0	140.16	17455000
VYFDISVGNPVGK	0	Unmodified					_VYFDISVGNPVGK_							A0A178UN74	PNSL5	Photosynthetic NDH subunit of lumenal location 5, chloroplastic	U50	NaN	6134400
VFTGGKEPENPKSLK	2	Dimethyl (KR)		1			_VFTGGK(di)EPENPKSLK_	VFTGGK(0.464)EPENPK(0.464)SLK(0.071)			VFTGGK(0)EPENPK(0)SLK(-8.15)			A0A178UNA3	PMAT1	Phenolic glucoside malonyltransferase 1	U0	51.436	2436100
GDPGSGPVSIFGASTSK	0	Unmodified					_GDPGSGPVSIFGASTSK_							A0A178UNF0		Zinc finger CCCH domain-containing protein 52	U0	NaN	3073500
GDPGSGPVSIFGASTSK	0	Unmodified					_GDPGSGPVSIFGASTSK_							A0A178UNF0		Zinc finger CCCH domain-containing protein 52	U50	121.24	3809400
AMQLMTDNR	0	Oxidation (M)				1	_AM(ox)QLMTDNR_			AM(0.998)QLM(0.002)TDNR			AM(27.12)QLM(-27.12)TDNR	A0A178UNP9	CBSX3	CBS domain-containing protein CBSX3, mitochondrial	U0	60.118	1029300
AMQLMTDNR	0	Oxidation (M)				1	_AM(ox)QLMTDNR_			AM(0.993)QLM(0.007)TDNR			AM(21.42)QLM(-21.42)TDNR	A0A178UNP9	CBSX3	CBS domain-containing protein CBSX3, mitochondrial	U0	71.379
AMQLMTDNR	0	Unmodified					_AMQLMTDNR_							A0A178UNP9	CBSX3	CBS domain-containing protein CBSX3, mitochondrial	U0	210.26	84392000
AMQLMTDNR	0	Unmodified					_AMQLMTDNR_							A0A178UNP9	CBSX3	CBS domain-containing protein CBSX3, mitochondrial	U50	123.69	18460000
AMQLMTDNRIR	1	Unmodified					_AMQLMTDNRIR_							A0A178UNP9	CBSX3	CBS domain-containing protein CBSX3, mitochondrial	U0	152.07	65533000
AMQLMTDNRIR	1	Unmodified					_AMQLMTDNRIR_							A0A178UNP9	CBSX3	CBS domain-containing protein CBSX3, mitochondrial	U0	158.08	8603600
AMQLMTDNRIR	1	Oxidation (M)				1	_AMQLM(ox)TDNRIR_							A0A178UNP9	CBSX3	CBS domain-containing protein CBSX3, mitochondrial	U0	NaN	10556000
AMQLMTDNRIR	1	Unmodified					_AMQLMTDNRIR_							A0A178UNP9	CBSX3	CBS domain-containing protein CBSX3, mitochondrial	U50	129.89	26636000
AMQLMTDNRIR	1	Oxidation (M)				1	_AMQLM(ox)TDNRIR_			AM(0.001)QLM(0.999)TDNRIR			AM(-29.45)QLM(29.45)TDNRIR	A0A178UNP9	CBSX3	CBS domain-containing protein CBSX3, mitochondrial	U50	43.897	5170700
AVVHEHREELQR	1	Unmodified					_AVVHEHREELQR_							A0A178UNP9	CBSX3	CBS domain-containing protein CBSX3, mitochondrial	U0	132.32	3453400
DKGMIGMVSIGDVVR	1	Oxidation (M)				1	_DKGM(ox)IGMVSIGDVVR_			DKGM(0.995)IGM(0.005)VSIGDVVR			DKGM(22.71)IGM(-22.71)VSIGDVVR	A0A178UNP9	CBSX3	CBS domain-containing protein CBSX3, mitochondrial	U0	91.657	10476000
DKGMIGMVSIGDVVR	1	Unmodified					_DKGMIGMVSIGDVVR_							A0A178UNP9	CBSX3	CBS domain-containing protein CBSX3, mitochondrial	U0	89.866	16650000
GMIGMVSIGDVVR	0	Oxidation (M)				1	_GMIGM(ox)VSIGDVVR_			GMIGM(1)VSIGDVVR			GM(-34.89)IGM(34.89)VSIGDVVR	A0A178UNP9	CBSX3	CBS domain-containing protein CBSX3, mitochondrial	U0	130.41	14876000
GMIGMVSIGDVVR	0	Oxidation (M)				1	_GM(ox)IGMVSIGDVVR_			GM(1)IGMVSIGDVVR			GM(81.82)IGM(-81.82)VSIGDVVR	A0A178UNP9	CBSX3	CBS domain-containing protein CBSX3, mitochondrial	U0	145.25	12041000
GMIGMVSIGDVVR	0	Unmodified					_GMIGMVSIGDVVR_							A0A178UNP9	CBSX3	CBS domain-containing protein CBSX3, mitochondrial	U0	163.91	44496000
GMIGMVSIGDVVR	0	Oxidation (M)				1	_GM(ox)IGMVSIGDVVR_			GM(0.596)IGM(0.404)VSIGDVVR			GM(1.68)IGM(-1.68)VSIGDVVR	A0A178UNP9	CBSX3	CBS domain-containing protein CBSX3, mitochondrial	U50	42.395	1903300
GMIGMVSIGDVVR	0	Oxidation (M)				1	_GM(ox)IGMVSIGDVVR_							A0A178UNP9	CBSX3	CBS domain-containing protein CBSX3, mitochondrial	U50	NaN	1543100
GMIGMVSIGDVVR	0	Unmodified					_GMIGMVSIGDVVR_							A0A178UNP9	CBSX3	CBS domain-containing protein CBSX3, mitochondrial	U50	NaN	8161000
IRHIPVIKDK	2	Unmodified					_IRHIPVIKDK_							A0A178UNP9	CBSX3	CBS domain-containing protein CBSX3, mitochondrial	U0	40.616	591270
LITVTPETK	0	Unmodified					_LITVTPETK_							A0A178UNP9	CBSX3	CBS domain-containing protein CBSX3, mitochondrial	U0	NaN	59036000
LITVTPETK	0	Unmodified					_LITVTPETK_							A0A178UNP9	CBSX3	CBS domain-containing protein CBSX3, mitochondrial	U50	95.815	9488600
MEESGFESTTISDVMK	0	Oxidation (M)				1	_MEESGFESTTISDVM(ox)K_			MEESGFESTTISDVM(1)K			M(-121.84)EESGFESTTISDVM(121.84)K	A0A178UNP9	CBSX3	CBS domain-containing protein CBSX3, mitochondrial	U0	123.26	10193000
MEESGFESTTISDVMK	0	Oxidation (M)				1	_M(ox)EESGFESTTISDVMK_			M(1)EESGFESTTISDVMK			M(168.82)EESGFESTTISDVM(-168.82)K	A0A178UNP9	CBSX3	CBS domain-containing protein CBSX3, mitochondrial	U0	171.32	10228000
MEESGFESTTISDVMK	0	Unmodified					_MEESGFESTTISDVMK_							A0A178UNP9	CBSX3	CBS domain-containing protein CBSX3, mitochondrial	U0	153.38	26361000
MEESGFESTTISDVMK	0	Unmodified					_MEESGFESTTISDVMK_							A0A178UNP9	CBSX3	CBS domain-containing protein CBSX3, mitochondrial	U0	47.548	4010500
MEESGFESTTISDVMK	0	Oxidation (M)				1	_MEESGFESTTISDVM(ox)K_							A0A178UNP9	CBSX3	CBS domain-containing protein CBSX3, mitochondrial	U50	NaN	1843800
MEESGFESTTISDVMK	0	Oxidation (M)				1	_M(ox)EESGFESTTISDVMK_							A0A178UNP9	CBSX3	CBS domain-containing protein CBSX3, mitochondrial	U50	NaN	1532500
MEESGFESTTISDVMK	0	Unmodified					_MEESGFESTTISDVMK_							A0A178UNP9	CBSX3	CBS domain-containing protein CBSX3, mitochondrial	U50	102.66	2402600
STKVGDIMTEENKLITVTPETK	2	Unmodified					_STKVGDIMTEENKLITVTPETK_							A0A178UNP9	CBSX3	CBS domain-containing protein CBSX3, mitochondrial	U0	154.87	6957100
VGDIMTEENK	0	Unmodified					_VGDIMTEENK_							A0A178UNP9	CBSX3	CBS domain-containing protein CBSX3, mitochondrial	U0	198.65	21390000
VGDIMTEENKLITVTPETK	1	Oxidation (M)				1	_VGDIM(ox)TEENKLITVTPETK_			VGDIM(1)TEENKLITVTPETK			VGDIM(164.43)TEENKLITVTPETK	A0A178UNP9	CBSX3	CBS domain-containing protein CBSX3, mitochondrial	U0	164.43	59952000
VGDIMTEENKLITVTPETK	1	Unmodified					_VGDIMTEENKLITVTPETK_							A0A178UNP9	CBSX3	CBS domain-containing protein CBSX3, mitochondrial	U0	186.15	125490000
VGDIMTEENKLITVTPETK	1	Unmodified					_VGDIMTEENKLITVTPETK_							A0A178UNP9	CBSX3	CBS domain-containing protein CBSX3, mitochondrial	U0	342.97	7365300
VGDIMTEENKLITVTPETK	1	Oxidation (M)				1	_VGDIM(ox)TEENKLITVTPETK_			VGDIM(1)TEENKLITVTPETK			VGDIM(57.01)TEENKLITVTPETK	A0A178UNP9	CBSX3	CBS domain-containing protein CBSX3, mitochondrial	U50	57.009	8328000
VGDIMTEENKLITVTPETK	1	Unmodified					_VGDIMTEENKLITVTPETK_							A0A178UNP9	CBSX3	CBS domain-containing protein CBSX3, mitochondrial	U50	163.66	16374000
LQSNMPLR	0	Unmodified					_LQSNMPLR_							A0A178UNV0		Mevalonate kinase	U0	160.91	5110800
ALAGQKDEALFSANAAALASR	1	Unmodified					_ALAGQKDEALFSANAAALASR_							A0A178UNW3	MS1	5-methyltetrahydropteroyltriglutamate--homocysteine methyltransferase 1	U0	75.064	6335400
ALAGQKDEALFSANAAALASR	1	Unmodified					_ALAGQKDEALFSANAAALASR_							A0A178UNW3	MS1	5-methyltetrahydropteroyltriglutamate--homocysteine methyltransferase 1	U50	44.632	3816100
IPSSEEIADR	0	Unmodified					_IPSSEEIADR_							A0A178UNW3	MS1	5-methyltetrahydropteroyltriglutamate--homocysteine methyltransferase 1	U0	112.11	28253000
IPSSEEIADR	0	Unmodified					_IPSSEEIADR_							A0A178UNW3	MS1	5-methyltetrahydropteroyltriglutamate--homocysteine methyltransferase 1	U50	92.051	17000000
IPSSEEIADRVNK	1	Unmodified					_IPSSEEIADRVNK_							A0A178UNW3	MS1	5-methyltetrahydropteroyltriglutamate--homocysteine methyltransferase 1	U0	142.51	558140000
IPSSEEIADRVNK	1	Unmodified					_IPSSEEIADRVNK_							A0A178UNW3	MS1	5-methyltetrahydropteroyltriglutamate--homocysteine methyltransferase 1	U0	280.23	71799000
IPSSEEIADRVNK	1	Unmodified					_IPSSEEIADRVNK_							A0A178UNW3	MS1	5-methyltetrahydropteroyltriglutamate--homocysteine methyltransferase 1	U50	135.5	314390000
IPSSEEIADRVNK	1	Unmodified					_IPSSEEIADRVNK_							A0A178UNW3	MS1	5-methyltetrahydropteroyltriglutamate--homocysteine methyltransferase 1	U50	281.88	49534000
STAEDLQKVSADLR	1	Unmodified					_STAEDLQKVSADLR_							A0A178UNW3	MS1	5-methyltetrahydropteroyltriglutamate--homocysteine methyltransferase 1	U0	41.967	5433000
STAEDLQKVSADLR	1	Unmodified					_STAEDLQKVSADLR_							A0A178UNW3	MS1	5-methyltetrahydropteroyltriglutamate--homocysteine methyltransferase 1	U50	NaN	4155200
YTEVKPALKNMVDAAK	2	Oxidation (M)				1	_YTEVKPALKNM(ox)VDAAK_			YTEVKPALKNM(1)VDAAK			YTEVKPALKNM(64.21)VDAAK	A0A178UNW3	MS1	5-methyltetrahydropteroyltriglutamate--homocysteine methyltransferase 1	U0	64.21	9473800
YTEVKPALKNMVDAAK	2	Unmodified					_YTEVKPALKNMVDAAK_							A0A178UNW3	MS1	5-methyltetrahydropteroyltriglutamate--homocysteine methyltransferase 1	U0	91.616	23190000
YTEVKPALKNMVDAAK	2	Oxidation (M)				1	_YTEVKPALKNM(ox)VDAAK_			YTEVKPALKNM(1)VDAAK			YTEVKPALKNM(50.38)VDAAK	A0A178UNW3	MS1	5-methyltetrahydropteroyltriglutamate--homocysteine methyltransferase 1	U50	50.376	7101300
YTEVKPALKNMVDAAK	2	Unmodified					_YTEVKPALKNMVDAAK_							A0A178UNW3	MS1	5-methyltetrahydropteroyltriglutamate--homocysteine methyltransferase 1	U50	58.461	11920000
ASHIVGYPR	0	Acetyl (Protein N-term)	1				_(ac)ASHIVGYPR_							A0A178UNW3	MS1;MS2	5-methyltetrahydropteroyltriglutamate--homocysteine methyltransferase 1;5-methyltetrahydropteroyltriglutamate--homocysteine methyltransferase 2	U0	183.74	170940000
EGVKYGAGIGPGVYDIHSPR	1	Unmodified					_EGVKYGAGIGPGVYDIHSPR_							A0A178UNW3	MS1;MS2	5-methyltetrahydropteroyltriglutamate--homocysteine methyltransferase 1;5-methyltetrahydropteroyltriglutamate--homocysteine methyltransferase 2	U0	53.585	82020000
EGVKYGAGIGPGVYDIHSPR	1	Unmodified					_EGVKYGAGIGPGVYDIHSPR_							A0A178UNW3	MS1;MS2	5-methyltetrahydropteroyltriglutamate--homocysteine methyltransferase 1;5-methyltetrahydropteroyltriglutamate--homocysteine methyltransferase 2	U0	109.37	28703000
EGVKYGAGIGPGVYDIHSPR	1	Unmodified					_EGVKYGAGIGPGVYDIHSPR_							A0A178UNW3	MS1;MS2	5-methyltetrahydropteroyltriglutamate--homocysteine methyltransferase 1;5-methyltetrahydropteroyltriglutamate--homocysteine methyltransferase 2	U50	64.203	46879000
EGVKYGAGIGPGVYDIHSPR	1	Unmodified					_EGVKYGAGIGPGVYDIHSPR_							A0A178UNW3	MS1;MS2	5-methyltetrahydropteroyltriglutamate--homocysteine methyltransferase 1;5-methyltetrahydropteroyltriglutamate--homocysteine methyltransferase 2	U50	NaN	15732000
GNASVPAMEMTK	0	Unmodified					_GNASVPAMEMTK_							A0A178UNW3	MS1;MS2	5-methyltetrahydropteroyltriglutamate--homocysteine methyltransferase 1;5-methyltetrahydropteroyltriglutamate--homocysteine methyltransferase 2	U0	94.66	28721000
GNASVPAMEMTK	0	Unmodified					_GNASVPAMEMTK_							A0A178UNW3	MS1;MS2	5-methyltetrahydropteroyltriglutamate--homocysteine methyltransferase 1;5-methyltetrahydropteroyltriglutamate--homocysteine methyltransferase 2	U50	87.789
KYTEVKPALK	2	Unmodified					_KYTEVKPALK_							A0A178UNW3	MS1;MS2	5-methyltetrahydropteroyltriglutamate--homocysteine methyltransferase 1;5-methyltetrahydropteroyltriglutamate--homocysteine methyltransferase 2	U0	61.56	3237300
KYTEVKPALK	2	Unmodified					_KYTEVKPALK_							A0A178UNW3	MS1;MS2	5-methyltetrahydropteroyltriglutamate--homocysteine methyltransferase 1;5-methyltetrahydropteroyltriglutamate--homocysteine methyltransferase 2	U50	NaN	1160600
LLSVFREGVK	1	Unmodified					_LLSVFREGVK_							A0A178UNW3	MS1;MS2	5-methyltetrahydropteroyltriglutamate--homocysteine methyltransferase 1;5-methyltetrahydropteroyltriglutamate--homocysteine methyltransferase 2	U0	131.22	11904000
LLSVFREGVK	1	Unmodified					_LLSVFREGVK_							A0A178UNW3	MS1;MS2	5-methyltetrahydropteroyltriglutamate--homocysteine methyltransferase 1;5-methyltetrahydropteroyltriglutamate--homocysteine methyltransferase 2	U50	123.6	8544500
SDEKLLSVFR	1	Unmodified					_SDEKLLSVFR_							A0A178UNW3	MS1;MS2	5-methyltetrahydropteroyltriglutamate--homocysteine methyltransferase 1;5-methyltetrahydropteroyltriglutamate--homocysteine methyltransferase 2	U0	205.73	52699000
SDEKLLSVFR	1	Unmodified					_SDEKLLSVFR_							A0A178UNW3	MS1;MS2	5-methyltetrahydropteroyltriglutamate--homocysteine methyltransferase 1;5-methyltetrahydropteroyltriglutamate--homocysteine methyltransferase 2	U50	209.21	29067000
SDEKLLSVFREGVK	2	Unmodified					_SDEKLLSVFREGVK_							A0A178UNW3	MS1;MS2	5-methyltetrahydropteroyltriglutamate--homocysteine methyltransferase 1;5-methyltetrahydropteroyltriglutamate--homocysteine methyltransferase 2	U0	174.24	39922000
SDEKLLSVFREGVK	2	Unmodified					_SDEKLLSVFREGVK_							A0A178UNW3	MS1;MS2	5-methyltetrahydropteroyltriglutamate--homocysteine methyltransferase 1;5-methyltetrahydropteroyltriglutamate--homocysteine methyltransferase 2	U0	134.99	2942000
SDEKLLSVFREGVK	2	Unmodified					_SDEKLLSVFREGVK_							A0A178UNW3	MS1;MS2	5-methyltetrahydropteroyltriglutamate--homocysteine methyltransferase 1;5-methyltetrahydropteroyltriglutamate--homocysteine methyltransferase 2	U0	NaN	29845000
SDEKLLSVFREGVK	2	Unmodified					_SDEKLLSVFREGVK_							A0A178UNW3	MS1;MS2	5-methyltetrahydropteroyltriglutamate--homocysteine methyltransferase 1;5-methyltetrahydropteroyltriglutamate--homocysteine methyltransferase 2	U50	76.009	16723000
SDEKLLSVFREGVK	2	Unmodified					_SDEKLLSVFREGVK_							A0A178UNW3	MS1;MS2	5-methyltetrahydropteroyltriglutamate--homocysteine methyltransferase 1;5-methyltetrahydropteroyltriglutamate--homocysteine methyltransferase 2	U50	153.51	28616000
SDEKLLSVFREGVK	2	Unmodified					_SDEKLLSVFREGVK_							A0A178UNW3	MS1;MS2	5-methyltetrahydropteroyltriglutamate--homocysteine methyltransferase 1;5-methyltetrahydropteroyltriglutamate--homocysteine methyltransferase 2	U50	NaN	1703700
YTEVKPALK	1	Unmodified					_YTEVKPALK_							A0A178UNW3	MS1;MS2	5-methyltetrahydropteroyltriglutamate--homocysteine methyltransferase 1;5-methyltetrahydropteroyltriglutamate--homocysteine methyltransferase 2	U0	138.78	16159000
YTEVKPALK	1	Unmodified					_YTEVKPALK_							A0A178UNW3	MS1;MS2	5-methyltetrahydropteroyltriglutamate--homocysteine methyltransferase 1;5-methyltetrahydropteroyltriglutamate--homocysteine methyltransferase 2	U50	141.52	7709400
YGAGIGPGVYDIHSPR	0	Unmodified					_YGAGIGPGVYDIHSPR_							A0A178UNW3	MS1;MS2;At5g20980;MS3	5-methyltetrahydropteroyltriglutamate--homocysteine methyltransferase 1;5-methyltetrahydropteroyltriglutamate--homocysteine methyltransferase 2;5-methyltetrahydropteroyltriglutamate--homocysteine methyltransferase 3, chloroplastic	U0	101.72	414760000
YGAGIGPGVYDIHSPR	0	Unmodified					_YGAGIGPGVYDIHSPR_							A0A178UNW3	MS1;MS2;At5g20980;MS3	5-methyltetrahydropteroyltriglutamate--homocysteine methyltransferase 1;5-methyltetrahydropteroyltriglutamate--homocysteine methyltransferase 2;5-methyltetrahydropteroyltriglutamate--homocysteine methyltransferase 3, chloroplastic	U0	173.72	23654000
YGAGIGPGVYDIHSPR	0	Unmodified					_YGAGIGPGVYDIHSPR_							A0A178UNW3	MS1;MS2;At5g20980;MS3	5-methyltetrahydropteroyltriglutamate--homocysteine methyltransferase 1;5-methyltetrahydropteroyltriglutamate--homocysteine methyltransferase 2;5-methyltetrahydropteroyltriglutamate--homocysteine methyltransferase 3, chloroplastic	U50	108.34	201110000
YGAGIGPGVYDIHSPR	0	Unmodified					_YGAGIGPGVYDIHSPR_							A0A178UNW3	MS1;MS2;At5g20980;MS3	5-methyltetrahydropteroyltriglutamate--homocysteine methyltransferase 1;5-methyltetrahydropteroyltriglutamate--homocysteine methyltransferase 2;5-methyltetrahydropteroyltriglutamate--homocysteine methyltransferase 3, chloroplastic	U50	148.78	12359000
AGPLQLTQLVNR	0	Unmodified					_AGPLQLTQLVNR_							A0A178UNZ3	NLE1	Notchless protein homolog	U0	113.71	1537500
AGPLQLTQLVNR	0	Unmodified					_AGPLQLTQLVNR_							A0A178UNZ3	NLE1	Notchless protein homolog	U50	NaN	753410
EQVASVTGVVTEQQR	0	Unmodified					_EQVASVTGVVTEQQR_							A0A178UP71	At5g25270		U0	NaN	4280900
EQVASVTGVVTEQQR	0	Unmodified					_EQVASVTGVVTEQQR_							A0A178UP71	At5g25270		U50	224.24	7111100
TLDSQTYTLRVDK	1	Unmodified					_TLDSQTYTLRVDK_							A0A178UP71	At5g25270		U0	70.829	8585000
TLDSQTYTLRVDK	1	Unmodified					_TLDSQTYTLRVDK_							A0A178UP71	At5g25270		U50	86.699
GLAEFQQK	0	Unmodified					_GLAEFQQK_							A0A178UQE0		ATP synthase subunit delta, mitochondrial	U0	114.02	57286000
GLAEFQQK	0	Unmodified					_GLAEFQQK_							A0A178UQE0		ATP synthase subunit delta, mitochondrial	U50	70.716	4974800
PSTPSSIPTK	0	Unmodified					_PSTPSSIPTK_							A0A178UQE0		ATP synthase subunit delta, mitochondrial	U0	156.46
LAMQREEVAWGKR	2	Methyl (KR),Dimethyl (KR)		1	1		_LAMQREEVAWGK(me)R(di)_	LAMQR(0.002)EEVAWGK(0.499)R(0.499)	LAMQR(0.002)EEVAWGK(0.499)R(0.499)		LAMQR(-27.85)EEVAWGK(0)R(0)	LAMQR(-27.85)EEVAWGK(0)R(0)		A0A178URA7			U0	46.158	6360800
AAVAYEPNKPLVIEDVQVAPPQAGEVR	1	Unmodified					_AAVAYEPNKPLVIEDVQVAPPQAGEVR_							A0A178URC5	ADH2	Alcohol dehydrogenase class-3	U0	66.282	6047100
AAVAYEPNKPLVIEDVQVAPPQAGEVR	1	Unmodified					_AAVAYEPNKPLVIEDVQVAPPQAGEVR_							A0A178URC5	ADH2	Alcohol dehydrogenase class-3	U50	NaN	1263400
AFDLLHEGTCLR	0	Unmodified					_AFDLLHEGTCLR_							A0A178URC5	ADH2;HOT5;At5g43940	Alcohol dehydrogenase class-3;S-(hydroxymethyl)glutathione dehydrogenase	U0	57.225	5705900
ATQGQVITCK	0	Acetyl (Protein N-term)	1				_(ac)ATQGQVITCK_							A0A178URC5	ADH2;HOT5	Alcohol dehydrogenase class-3;S-(hydroxymethyl)glutathione dehydrogenase	U0	174.8	17263000
ATQGQVITCK	0	Acetyl (Protein N-term)	1				_(ac)ATQGQVITCK_							A0A178URC5	ADH2;HOT5	Alcohol dehydrogenase class-3;S-(hydroxymethyl)glutathione dehydrogenase	U50	NaN	3090900
FGVNEFVNPK	0	Unmodified					_FGVNEFVNPK_							A0A178URC5	ADH2;HOT5;At5g43940	Alcohol dehydrogenase class-3;S-(hydroxymethyl)glutathione dehydrogenase	U0	122.52	11127000
FGVNEFVNPK	0	Unmodified					_FGVNEFVNPK_							A0A178URC5	ADH2;HOT5;At5g43940	Alcohol dehydrogenase class-3;S-(hydroxymethyl)glutathione dehydrogenase	U50	NaN	2189000
KFGVNEFVNPK	1	Unmodified					_KFGVNEFVNPK_							A0A178URC5	ADH2;HOT5;At5g43940	Alcohol dehydrogenase class-3;S-(hydroxymethyl)glutathione dehydrogenase	U0	39.58	6674100
SATGVGIMMNDRK	1	Oxidation (M)				1	_SATGVGIMM(ox)NDRK_			SATGVGIM(0.157)M(0.843)NDRK			SATGVGIM(-7.29)M(7.29)NDRK	A0A178URC5	ADH2;HOT5	Alcohol dehydrogenase class-3;S-(hydroxymethyl)glutathione dehydrogenase	U0	40.025	3492000
SATGVGIMMNDRK	1	Unmodified					_SATGVGIMMNDRK_							A0A178URC5	ADH2;HOT5	Alcohol dehydrogenase class-3;S-(hydroxymethyl)glutathione dehydrogenase	U0	83.204	13950000
SATGVGIMMNDRK	1	Unmodified					_SATGVGIMMNDRK_							A0A178URC5	ADH2;HOT5	Alcohol dehydrogenase class-3;S-(hydroxymethyl)glutathione dehydrogenase	U50	NaN	3265200
ITSGQLNAAAR	0	Unmodified					_ITSGQLNAAAR_							A0A178URQ0	VTI11	Vesicle transport v-SNARE 11	U0	128.12	2654500
ITSGQLNAAARDELLEAGMADTK	1	Unmodified					_ITSGQLNAAARDELLEAGMADTK_							A0A178URQ0	VTI11	Vesicle transport v-SNARE 11	U0	130.71	5642900
ITSGQLNAAARDELLEAGMADTK	1	Unmodified					_ITSGQLNAAARDELLEAGMADTK_							A0A178URQ0	VTI11	Vesicle transport v-SNARE 11	U50	NaN	940200
SGLENAEVLIR	0	Unmodified					_SGLENAEVLIR_							A0A178URQ0	VTI11	Vesicle transport v-SNARE 11	U0	104.48	8258400
SFFEQKPTKDPQNSK	2	Unmodified					_SFFEQKPTKDPQNSK_							A0A178US20	UBP24	Ubiquitin carboxyl-terminal hydrolase 24	U0	28.296	3126800
SFFEQKPTKDPQNSK	2	Unmodified					_SFFEQKPTKDPQNSK_							A0A178US20	UBP24	Ubiquitin carboxyl-terminal hydrolase 24	U50	NaN	2210300
NFTPDVLNNMSGRPR	1	Unmodified					_NFTPDVLNNMSGRPR_							A0A178US20	UBP24;At4g30890	Ubiquitin carboxyl-terminal hydrolase 24;Ubiquitin carboxyl-terminal hydrolase	U50	37.594
GADGQLESFSCSLAK	0	Unmodified					_GADGQLESFSCSLAK_							A0A178USJ2		Thioredoxin-like 2-2, chloroplastic	U0	117.25	5771700
GADGQLESFSCSLAK	0	Unmodified					_GADGQLESFSCSLAK_							A0A178USJ2		Thioredoxin-like 2-2, chloroplastic	U0	151.79	4548900
GADGQLESFSCSLAK	0	Unmodified					_GADGQLESFSCSLAK_							A0A178USJ2		Thioredoxin-like 2-2, chloroplastic	U0	198.57	496080000
GADGQLESFSCSLAK	0	Unmodified					_GADGQLESFSCSLAK_							A0A178USJ2		Thioredoxin-like 2-2, chloroplastic	U0	134.91	66925000
GADGQLESFSCSLAK	0	Methyl (KR)			1		_GADGQLESFSCSLAK(me)_		GADGQLESFSCSLAK(1)			GADGQLESFSCSLAK(151.1)		A0A178USJ2		Thioredoxin-like 2-2, chloroplastic	U0	151.1	95290000
GADGQLESFSCSLAK	0	Methyl (KR)			1		_GADGQLESFSCSLAK(me)_		GADGQLESFSCSLAK(1)			GADGQLESFSCSLAK(108.66)		A0A178USJ2		Thioredoxin-like 2-2, chloroplastic	U0	108.66	15053000
GADGQLESFSCSLAK	0	Unmodified					_GADGQLESFSCSLAK_							A0A178USJ2		Thioredoxin-like 2-2, chloroplastic	U50	216.06	131650000
GADGQLESFSCSLAK	0	Unmodified					_GADGQLESFSCSLAK_							A0A178USJ2		Thioredoxin-like 2-2, chloroplastic	U50	100.31	15571000
GADGQLESFSCSLAK	0	Methyl (KR)			1		_GADGQLESFSCSLAK(me)_							A0A178USJ2		Thioredoxin-like 2-2, chloroplastic	U50	NaN	14232000
GADGQLESFSCSLAK	0	Methyl (KR)			1		_GADGQLESFSCSLAK(me)_							A0A178USJ2		Thioredoxin-like 2-2, chloroplastic	U50	NaN	2205600
LCKTAVEHPDIVFLK	1	Unmodified					_LCKTAVEHPDIVFLK_							A0A178USJ2		Thioredoxin-like 2-2, chloroplastic	U0	39.427	4924900
TAVEHPDIVFLK	0	Unmodified					_TAVEHPDIVFLK_							A0A178USJ2		Thioredoxin-like 2-2, chloroplastic	U0	172.56	150550000
TAVEHPDIVFLK	0	Unmodified					_TAVEHPDIVFLK_							A0A178USJ2		Thioredoxin-like 2-2, chloroplastic	U0	82.774	794040000
TAVEHPDIVFLK	0	Unmodified					_TAVEHPDIVFLK_							A0A178USJ2		Thioredoxin-like 2-2, chloroplastic	U50	90.005	216960000
TAVEHPDIVFLK	0	Unmodified					_TAVEHPDIVFLK_							A0A178USJ2		Thioredoxin-like 2-2, chloroplastic	U50	188.99	38758000
VDENVAETEPPKWWER	1	Unmodified					_VDENVAETEPPKWWER_							A0A178USJ2		Thioredoxin-like 2-2, chloroplastic	U0	107.46	19315000
VDENVAETEPPKWWER	1	Unmodified					_VDENVAETEPPKWWER_							A0A178USJ2		Thioredoxin-like 2-2, chloroplastic	U50	107.34	6778000
VKVDENVAETEPPKWWER	2	Unmodified					_VKVDENVAETEPPKWWER_							A0A178USJ2		Thioredoxin-like 2-2, chloroplastic	U0	190.96	20141000
VKVDENVAETEPPKWWER	2	Methyl (KR)			1		_VK(me)VDENVAETEPPKWWER_		VK(1)VDENVAETEPPKWWER			VK(112.25)VDENVAETEPPK(-112.25)WWER(-117.17)		A0A178USJ2		Thioredoxin-like 2-2, chloroplastic	U0	120.56	22315000
VKVDENVAETEPPKWWER	2	Methyl (KR)			1		_VK(me)VDENVAETEPPKWWER_		VK(1)VDENVAETEPPKWWER			VK(99.44)VDENVAETEPPK(-99.44)WWER(-103.71)		A0A178USJ2		Thioredoxin-like 2-2, chloroplastic	U0	103.71	29731000
VKVDENVAETEPPKWWER	2	Unmodified					_VKVDENVAETEPPKWWER_							A0A178USJ2		Thioredoxin-like 2-2, chloroplastic	U50	104.92	34391000
VKVDENVAETEPPKWWER	2	Unmodified					_VKVDENVAETEPPKWWER_							A0A178USJ2		Thioredoxin-like 2-2, chloroplastic	U50	NaN	19522000
VKVDENVAETEPPKWWER	2	Methyl (KR)			1		_VK(me)VDENVAETEPPKWWER_		VK(1)VDENVAETEPPKWWER			VK(85.59)VDENVAETEPPK(-85.59)WWER(-89.86)		A0A178USJ2		Thioredoxin-like 2-2, chloroplastic	U50	89.859	28294000
VLPFFHFYR	0	Unmodified					_VLPFFHFYR_							A0A178USJ2		Thioredoxin-like 2-2, chloroplastic	U0	135.87	96207000
VLPFFHFYR	0	Unmodified					_VLPFFHFYR_							A0A178USJ2		Thioredoxin-like 2-2, chloroplastic	U0	107.9
VLPFFHFYR	0	Unmodified					_VLPFFHFYR_							A0A178USJ2		Thioredoxin-like 2-2, chloroplastic	U50	107.9	255890000
VLPFFHFYR	0	Unmodified					_VLPFFHFYR_							A0A178USJ2		Thioredoxin-like 2-2, chloroplastic	U50	138.85	65799000
VNFDENKPMCK	1	Oxidation (M)				1	_VNFDENKPM(ox)CK_			VNFDENKPM(1)CK			VNFDENKPM(106.62)CK	A0A178USJ2		Thioredoxin-like 2-2, chloroplastic	U0	106.62	24468000
VNFDENKPMCK	1	Oxidation (M),Methyl (KR)			1	1	_VNFDENKPM(ox)CK(me)_		VNFDENK(0.159)PMCK(0.841)	VNFDENKPM(1)CK		VNFDENK(-7.22)PMCK(7.22)	VNFDENKPM(84.51)CK	A0A178USJ2		Thioredoxin-like 2-2, chloroplastic	U0	84.507	8088500
VNFDENKPMCK	1	Unmodified					_VNFDENKPMCK_							A0A178USJ2		Thioredoxin-like 2-2, chloroplastic	U0	117.52	306100000
VNFDENKPMCK	1	Unmodified					_VNFDENKPMCK_							A0A178USJ2		Thioredoxin-like 2-2, chloroplastic	U0	169.41	51208000
VNFDENKPMCK	1	Methyl (KR)			1		_VNFDENKPMCK(me)_		VNFDENK(0.037)PMCK(0.963)			VNFDENK(-14.19)PMCK(14.19)		A0A178USJ2		Thioredoxin-like 2-2, chloroplastic	U0	115.57	46978000
VNFDENKPMCK	1	Oxidation (M)				1	_VNFDENKPM(ox)CK_			VNFDENKPM(1)CK			VNFDENKPM(85.82)CK	A0A178USJ2		Thioredoxin-like 2-2, chloroplastic	U50	85.821	10404000
VNFDENKPMCK	1	Unmodified					_VNFDENKPMCK_							A0A178USJ2		Thioredoxin-like 2-2, chloroplastic	U50	110.39	94211000
VNFDENKPMCK	1	Unmodified					_VNFDENKPMCK_							A0A178USJ2		Thioredoxin-like 2-2, chloroplastic	U50	166.66	21288000
VNFDENKPMCK	1	Methyl (KR)			1		_VNFDENKPMCK(me)_		VNFDENK(0.002)PMCK(0.998)			VNFDENK(-26.42)PMCK(26.42)		A0A178USJ2		Thioredoxin-like 2-2, chloroplastic	U50	79.659	7541300
CSLGPAKVPEGLTLAK	1	Unmodified					_CSLGPAKVPEGLTLAK_							A0A178USJ2			U0	65.724	13716000
CSLGPAKVPEGLTLAK	1	Unmodified					_CSLGPAKVPEGLTLAK_							A0A178USJ2			U50	NaN	2786900
CSLGPAKVPEGLTLAKPAASS	2	Unmodified					_CSLGPAKVPEGLTLAKPAASS_							A0A178USJ2			U0	77.681	126380000
CSLGPAKVPEGLTLAKPAASS	2	Unmodified					_CSLGPAKVPEGLTLAKPAASS_							A0A178USJ2			U0	149.37	5288300
CSLGPAKVPEGLTLAKPAASS	2	Methyl (KR)			1		_CSLGPAK(me)VPEGLTLAKPAASS_		CSLGPAK(1)VPEGLTLAKPAASS			CSLGPAK(51.54)VPEGLTLAK(-51.54)PAASS		A0A178USJ2			U0	54.383	77442000
CSLGPAKVPEGLTLAKPAASS	2	Unmodified					_CSLGPAKVPEGLTLAKPAASS_							A0A178USJ2			U50	77.681	27395000
CSLGPAKVPEGLTLAKPAASS	2	Unmodified					_CSLGPAKVPEGLTLAKPAASS_							A0A178USJ2			U50	NaN	1053100
CSLGPAKVPEGLTLAKPAASS	2	Methyl (KR)			1		_CSLGPAK(me)VPEGLTLAKPAASS_		CSLGPAK(1)VPEGLTLAKPAASS			CSLGPAK(50.94)VPEGLTLAK(-50.94)PAASS		A0A178USJ2			U50	53.779	9188500
FQKIKDAIQLHNTDR	2	Unmodified					_FQKIKDAIQLHNTDR_							A0A178USJ2			U0	133.14	32449000
FQKIKDAIQLHNTDR	2	Unmodified					_FQKIKDAIQLHNTDR_							A0A178USJ2			U0	86.497	8475200
FQKIKDAIQLHNTDR	2	Unmodified					_FQKIKDAIQLHNTDR_							A0A178USJ2			U50	NaN	2352200
FQKIKDAIQLHNTDR	2	Unmodified					_FQKIKDAIQLHNTDR_							A0A178USJ2			U50	NaN	12575000
IKDAIQLHNTDR	1	Unmodified					_IKDAIQLHNTDR_							A0A178USJ2			U0	133.71	380320000
IKDAIQLHNTDR	1	Unmodified					_IKDAIQLHNTDR_							A0A178USJ2			U0	203.61	27051000
IKDAIQLHNTDR	1	Unmodified					_IKDAIQLHNTDR_							A0A178USJ2			U50	130.4	106710000
IKDAIQLHNTDR	1	Unmodified					_IKDAIQLHNTDR_							A0A178USJ2			U50	215.08	6348000
IKDAIQLHNTDRCSLGPAK	2	Unmodified					_IKDAIQLHNTDRCSLGPAK_							A0A178USJ2			U0	38.915	8457300
IKDAIQLHNTDRCSLGPAK	2	Unmodified					_IKDAIQLHNTDRCSLGPAK_							A0A178USJ2			U50	NaN	4827200
VPEGLTLAK	0	Unmodified					_VPEGLTLAK_							A0A178USJ2			U0	101.43	19159000
VPEGLTLAK	0	Unmodified					_VPEGLTLAK_							A0A178USJ2			U50	NaN	4515000
VPEGLTLAKPAASS	1	Unmodified					_VPEGLTLAKPAASS_							A0A178USJ2			U0	179.95	138310000
VPEGLTLAKPAASS	1	Unmodified					_VPEGLTLAKPAASS_							A0A178USJ2			U50	140.78	30022000
SNDPHGLHCSGGVVLASR	0	Unmodified					_SNDPHGLHCSGGVVLASR_							A0A178UT42	VHA-E1	V-type proton ATPase subunit E1	U50	50.87	1836400
ATKDEITVLENELK	1	Unmodified					_ATKDEITVLENELK_							A0A178UT56	PPI1	Proton pump-interactor 1	U50	43.914	2254100
AYSNIHDLRR	1	Unmodified					_AYSNIHDLRR_							A0A178UT56	PPI1	Proton pump-interactor 1	U50	77.14	2410500
DKAYSNIHDLRR	2	Unmodified					_DKAYSNIHDLRR_							A0A178UT56	PPI1	Proton pump-interactor 1	U50	122.34	2708500
ILQSLDSR	0	Unmodified					_ILQSLDSR_							A0A178UT56	PPI1	Proton pump-interactor 1	U50	149.48	44137000
NAAEEWPVAK	0	Unmodified					_NAAEEWPVAK_							A0A178UT56	PPI1	Proton pump-interactor 1	U50	92.838	13072000
TGVLDKLR	1	Unmodified					_TGVLDKLR_							A0A178UT56	PPI1	Proton pump-interactor 1	U50	134.08	15547000
DYQASLPQER	0	Unmodified					_DYQASLPQER_							A0A178UTL0	AMSH3	AMSH-like ubiquitin thioesterase 3	U50	107.79	11223000
EIEVDNRIPLRNYYR	2	Unmodified					_EIEVDNRIPLRNYYR_							A0A178UTL0	AMSH3	AMSH-like ubiquitin thioesterase 3	U50	35.659	7054200
IADNLLR	0	Unmodified					_IADNLLR_							A0A178UTL0	AMSH3	AMSH-like ubiquitin thioesterase 3	U0	NaN	1049200
IADNLLR	0	Unmodified					_IADNLLR_							A0A178UTL0	AMSH3	AMSH-like ubiquitin thioesterase 3	U50	138.25	27099000
YSSLISETIPFHR	0	Unmodified					_YSSLISETIPFHR_							A0A178UTL0	AMSH3	AMSH-like ubiquitin thioesterase 3	U0	NaN	649630
YSSLISETIPFHR	0	Unmodified					_YSSLISETIPFHR_							A0A178UTL0	AMSH3	AMSH-like ubiquitin thioesterase 3	U50	84.169	7363700
YSSLISETIPFHR	0	Unmodified					_YSSLISETIPFHR_							A0A178UTL0	AMSH3	AMSH-like ubiquitin thioesterase 3	U50	123.86	1043800
CVIVEGSTSR	0	Unmodified					_CVIVEGSTSR_							A0A178UTL3		3-hydroxyisobutyryl-CoA hydrolase-like protein 3, mitochondrial	U0	NaN	2797600
CVIVEGSTSR	0	Unmodified					_CVIVEGSTSR_							A0A178UTL3		3-hydroxyisobutyryl-CoA hydrolase-like protein 3, mitochondrial	U50	97.431	2839200
GAPFSLYLTQK	0	Unmodified					_GAPFSLYLTQK_							A0A178UTL3		3-hydroxyisobutyryl-CoA hydrolase-like protein 3, mitochondrial	U0	NaN	2022200
GAPFSLYLTQK	0	Unmodified					_GAPFSLYLTQK_							A0A178UTL3		3-hydroxyisobutyryl-CoA hydrolase-like protein 3, mitochondrial	U50	87.258	2462700
GVAAEIQKDKNTPLVQK	2	Unmodified					_GVAAEIQKDKNTPLVQK_							A0A178UTL3		3-hydroxyisobutyryl-CoA hydrolase-like protein 3, mitochondrial	U0	NaN	1700200
GVAAEIQKDKNTPLVQK	2	Unmodified					_GVAAEIQKDKNTPLVQK_							A0A178UTL3		3-hydroxyisobutyryl-CoA hydrolase-like protein 3, mitochondrial	U50	109.48	3047900
YSSNPESEAHLK	0	Unmodified					_YSSNPESEAHLK_							A0A178UTL3		3-hydroxyisobutyryl-CoA hydrolase-like protein 3, mitochondrial	U50	30.468
CGALAPSGTSSGANDR	0	Unmodified					_CGALAPSGTSSGANDR_							A0A178UTZ9	TAF15B	Transcription initiation factor TFIID subunit 15b	U0	99.752
CGALAPSGTSSGANDRGGGGYSR	1	Unmodified					_CGALAPSGTSSGANDRGGGGYSR_							A0A178UTZ9	TAF15B	Transcription initiation factor TFIID subunit 15b	U0	98.269	4314500
CGALAPSGTSSGANDRGGGGYSR	1	Unmodified					_CGALAPSGTSSGANDRGGGGYSR_							A0A178UTZ9	TAF15B	Transcription initiation factor TFIID subunit 15b	U50	NaN	1014600
CPNPSCGNVNFAR	0	Unmodified					_CPNPSCGNVNFAR_							A0A178UTZ9	TAF15B	Transcription initiation factor TFIID subunit 15b	U0	150.35	14433000
CPNPSCGNVNFAR	0	Unmodified					_CPNPSCGNVNFAR_							A0A178UTZ9	TAF15B	Transcription initiation factor TFIID subunit 15b	U50	NaN	5144600
RVECNKCGALAPSGTSSGANDR	2	Unmodified					_RVECNKCGALAPSGTSSGANDR_							A0A178UTZ9	TAF15B	Transcription initiation factor TFIID subunit 15b	U0	79.69	1608500
SKYEHQEFLKPSLR	2	Unmodified					_SKYEHQEFLKPSLR_							A0A178UUS8	AGD12	ADP-ribosylation factor GTPase-activating protein AGD12	U0	NaN	4549100
SKYEHQEFLKPSLR	2	Unmodified					_SKYEHQEFLKPSLR_							A0A178UUS8	AGD12	ADP-ribosylation factor GTPase-activating protein AGD12	U50	99.511	19150000
SYSGAGLGKPGSGK	1	Acetyl (Protein N-term)	1				_(ac)SYSGAGLGKPGSGK_							A0A178UUS8	AGD12	ADP-ribosylation factor GTPase-activating protein AGD12	U0	153.54	6353400
SYSGAGLGKPGSGK	1	Acetyl (Protein N-term)	1				_(ac)SYSGAGLGKPGSGK_							A0A178UUS8	AGD12	ADP-ribosylation factor GTPase-activating protein AGD12	U50	203.03	11304000
SYSGAGLGKPGSGKR	2	Acetyl (Protein N-term)	1				_(ac)SYSGAGLGKPGSGKR_							A0A178UUS8	AGD12	ADP-ribosylation factor GTPase-activating protein AGD12	U0	NaN	5807000
SYSGAGLGKPGSGKR	2	Acetyl (Protein N-term)	1				_(ac)SYSGAGLGKPGSGKR_							A0A178UUS8	AGD12	ADP-ribosylation factor GTPase-activating protein AGD12	U50	79.022	11072000
MRDAIEEMNGKELDGR	2	Acetyl (Protein N-term),Oxidation (M),Methyl (KR)	1		1	1	_(ac)M(ox)R(me)DAIEEMNGKELDGR_		MR(0.999)DAIEEMNGK(0.001)ELDGR	M(0.5)RDAIEEM(0.5)NGKELDGR		MR(32.13)DAIEEMNGK(-32.13)ELDGR(-75.25)	M(0)RDAIEEM(0)NGKELDGR	A0A178UVB6			U0	76.322	42376000
MRDAIEEMNGKELDGR	2	Acetyl (Protein N-term),Oxidation (M),Methyl (KR)	1		1	1	_(ac)M(ox)R(me)DAIEEMNGKELDGR_							A0A178UVB6			U50	NaN	5607300
LADGLFLESCR	0	Unmodified					_LADGLFLESCR_							A0A178UVS2	IDH1;IDH3	Isocitrate dehydrogenase [NAD] regulatory subunit 1, mitochondrial;Isocitrate dehydrogenase [NAD] regulatory subunit 3, mitochondrial	U50	139.02	4766900
FGGSGARPNLPWVSTTGSGPHGR	1	Unmodified					_FGGSGARPNLPWVSTTGSGPHGR_							A0A178UVV4	AFPH2	AFP homolog 2	U0	NaN	3102900
FGGSGARPNLPWVSTTGSGPHGR	1	Unmodified					_FGGSGARPNLPWVSTTGSGPHGR_							A0A178UVV4	AFPH2	AFP homolog 2	U50	41.085	9491200
TISGVTYR	0	Unmodified					_TISGVTYR_							A0A178UVV4	AFPH2	AFP homolog 2	U0	NaN	3576900
TISGVTYR	0	Unmodified					_TISGVTYR_							A0A178UVV4	AFPH2	AFP homolog 2	U50	97.798	10557000
AVNVTAPGGGSLKK	1	Unmodified					_AVNVTAPGGGSLKK_							A0A178UVZ7	CSP1	Cold shock protein 1	U0	65.956	16022000
AVNVTAPGGGSLKK	1	Unmodified					_AVNVTAPGGGSLKK_							A0A178UVZ7	CSP1	Cold shock protein 1	U50	NaN	2852700
AVNVTAPGGGSLKKENNSR	2	Unmodified					_AVNVTAPGGGSLKKENNSR_							A0A178UVZ7	CSP1	Cold shock protein 1	U0	64.723	3630400
AVNVTAPGGGSLKKENNSR	2	Unmodified					_AVNVTAPGGGSLKKENNSR_							A0A178UVZ7	CSP1	Cold shock protein 1	U50	NaN	1290800
SGGGGSGTCYSCGGVGHIAR	0	Unmodified					_SGGGGSGTCYSCGGVGHIAR_							A0A178UVZ7	CSP1	Cold shock protein 1	U0	73.809
ACAEQALSVLNGTQLGGQSIR	0	Unmodified					_ACAEQALSVLNGTQLGGQSIR_							A0A178UW18	RBP45C	Polyadenylate-binding protein RBP45C	U0	127.37	8287700
ACAEQALSVLNGTQLGGQSIR	0	Unmodified					_ACAEQALSVLNGTQLGGQSIR_							A0A178UW18	RBP45C	Polyadenylate-binding protein RBP45C	U50	NaN	4393500
FADESEQIR	0	Unmodified					_FADESEQIR_							A0A178UW18	RBP45C	Polyadenylate-binding protein RBP45C	U0	172.14	16640000
FADESEQIR	0	Unmodified					_FADESEQIR_							A0A178UW18	RBP45C	Polyadenylate-binding protein RBP45C	U50	NaN	2716600
LNWAQLGAGERR	1	Unmodified					_LNWAQLGAGERR_							A0A178UW18	RBP45C	Polyadenylate-binding protein RBP45C	U0	137.55	10741000
LNWAQLGAGERR	1	Unmodified					_LNWAQLGAGERR_							A0A178UW18	RBP45C	Polyadenylate-binding protein RBP45C	U50	NaN	4523900
RCGFVQYANR	1	Unmodified					_RCGFVQYANR_							A0A178UW18	RBP45C	Polyadenylate-binding protein RBP45C	U0	51.445	5530300
RCGFVQYANR	1	Unmodified					_RCGFVQYANR_							A0A178UW18	RBP45C	Polyadenylate-binding protein RBP45C	U50	52.278	5337900
SVFGQFGELVHVK	0	Unmodified					_SVFGQFGELVHVK_							A0A178UW18	RBP45C	Polyadenylate-binding protein RBP45C	U0	43.798	12480000
GFGFVNFENADDAAR	0	Unmodified					_GFGFVNFENADDAAR_							A0A178UWB3	PAB2	Polyadenylate-binding protein 2	U0	113.38	12337000
GFGFVNFENADDAAR	0	Unmodified					_GFGFVNFENADDAAR_							A0A178UWB3	PAB2	Polyadenylate-binding protein 2	U50	77.597	4924700
SKGFGFVNFENADDAAR	1	Unmodified					_SKGFGFVNFENADDAAR_							A0A178UWB3	PAB2	Polyadenylate-binding protein 2	U0	86.016	10421000
SKGFGFVNFENADDAAR	1	Unmodified					_SKGFGFVNFENADDAAR_							A0A178UWB3	PAB2	Polyadenylate-binding protein 2	U50	NaN	2036500
SLGYGYVNFTNPQDAAR	0	Unmodified					_SLGYGYVNFTNPQDAAR_							A0A178UWB3	PAB2	Polyadenylate-binding protein 2	U0	130.1	4707700
SLGYGYVNFTNPQDAAR	0	Unmodified					_SLGYGYVNFTNPQDAAR_							A0A178UWB3	PAB2	Polyadenylate-binding protein 2	U50	NaN	1196100
VMYSHRDPSVR	1	Unmodified					_VMYSHRDPSVR_							A0A178UWB3	PAB2	Polyadenylate-binding protein 2	U0	49.466
GLDVVKAIEK	1	Unmodified					_GLDVVKAIEK_							A0A178UWH6	CYP18-4	Peptidyl-prolyl cis-trans isomerase CYP18-4	U0	144.65	11098000
GLDVVKAIEK	1	Unmodified					_GLDVVKAIEK_							A0A178UWH6	CYP18-4	Peptidyl-prolyl cis-trans isomerase CYP18-4	U50	185.6	19429000
GLDVVKAIEKVGSDSGK	2	Unmodified					_GLDVVKAIEKVGSDSGK_							A0A178UWH6	CYP18-4	Peptidyl-prolyl cis-trans isomerase CYP18-4	U0	NaN	4726700
GLDVVKAIEKVGSDSGK	2	Unmodified					_GLDVVKAIEKVGSDSGK_							A0A178UWH6	CYP18-4	Peptidyl-prolyl cis-trans isomerase CYP18-4	U50	86.453	8754500
HVVFGQVVK	0	Unmodified					_HVVFGQVVK_							A0A178UWH6	CYP18-4	Peptidyl-prolyl cis-trans isomerase CYP18-4	U0	158.36	48419000
HVVFGQVVK	0	Unmodified					_HVVFGQVVK_							A0A178UWH6	CYP18-4	Peptidyl-prolyl cis-trans isomerase CYP18-4	U50	154.35	60442000
IEMELFADTTPNTAENFR	0	Oxidation (M)				1	_IEM(ox)ELFADTTPNTAENFR_			IEM(1)ELFADTTPNTAENFR			IEM(92.43)ELFADTTPNTAENFR	A0A178UWH6	CYP18-4	Peptidyl-prolyl cis-trans isomerase CYP18-4	U0	92.427	8042200
IEMELFADTTPNTAENFR	0	Oxidation (M)				1	_IEM(ox)ELFADTTPNTAENFR_			IEM(1)ELFADTTPNTAENFR			IEM(213.06)ELFADTTPNTAENFR	A0A178UWH6	CYP18-4	Peptidyl-prolyl cis-trans isomerase CYP18-4	U0	213.06	5343700
IEMELFADTTPNTAENFR	0	Unmodified					_IEMELFADTTPNTAENFR_							A0A178UWH6	CYP18-4	Peptidyl-prolyl cis-trans isomerase CYP18-4	U0	204.48	17073000
IEMELFADTTPNTAENFR	0	Oxidation (M)				1	_IEM(ox)ELFADTTPNTAENFR_			IEM(1)ELFADTTPNTAENFR			IEM(88.59)ELFADTTPNTAENFR	A0A178UWH6	CYP18-4	Peptidyl-prolyl cis-trans isomerase CYP18-4	U50	88.593	4522700
IEMELFADTTPNTAENFR	0	Oxidation (M)				1	_IEM(ox)ELFADTTPNTAENFR_							A0A178UWH6	CYP18-4	Peptidyl-prolyl cis-trans isomerase CYP18-4	U50	NaN	2582200
IEMELFADTTPNTAENFR	0	Unmodified					_IEMELFADTTPNTAENFR_							A0A178UWH6	CYP18-4	Peptidyl-prolyl cis-trans isomerase CYP18-4	U50	NaN	9806200
TSKVVTITDCGQLS	1	Unmodified					_TSKVVTITDCGQLS_							A0A178UWH6	CYP18-4	Peptidyl-prolyl cis-trans isomerase CYP18-4	U0	80.245	7670900
TSKVVTITDCGQLS	1	Unmodified					_TSKVVTITDCGQLS_							A0A178UWH6	CYP18-4	Peptidyl-prolyl cis-trans isomerase CYP18-4	U50	113.38	13054000
TSWLDGKHVVFGQVVK	1	Unmodified					_TSWLDGKHVVFGQVVK_							A0A178UWH6	CYP18-4	Peptidyl-prolyl cis-trans isomerase CYP18-4	U0	52.008	6175700
TSWLDGKHVVFGQVVK	1	Unmodified					_TSWLDGKHVVFGQVVK_							A0A178UWH6	CYP18-4	Peptidyl-prolyl cis-trans isomerase CYP18-4	U50	NaN	5281500
VFFDMSLSGTPIGR	0	Oxidation (M)				1	_VFFDM(ox)SLSGTPIGR_			VFFDM(1)SLSGTPIGR			VFFDM(143.5)SLSGTPIGR	A0A178UWH6	CYP18-4	Peptidyl-prolyl cis-trans isomerase CYP18-4	U0	143.5	17159000
VFFDMSLSGTPIGR	0	Oxidation (M)				1	_VFFDM(ox)SLSGTPIGR_			VFFDM(1)SLSGTPIGR			VFFDM(175.86)SLSGTPIGR	A0A178UWH6	CYP18-4	Peptidyl-prolyl cis-trans isomerase CYP18-4	U50	175.86
VGSDSGKTSKVVTITDCGQLS	2	Unmodified					_VGSDSGKTSKVVTITDCGQLS_							A0A178UWH6	CYP18-4	Peptidyl-prolyl cis-trans isomerase CYP18-4	U50	57.464	6468600
VIPGFMCQGGDFTAK	0	Oxidation (M)				1	_VIPGFM(ox)CQGGDFTAK_			VIPGFM(1)CQGGDFTAK			VIPGFM(132.32)CQGGDFTAK	A0A178UWH6	CYP18-4	Peptidyl-prolyl cis-trans isomerase CYP18-4	U0	132.32	23346000
VIPGFMCQGGDFTAK	0	Unmodified					_VIPGFMCQGGDFTAK_							A0A178UWH6	CYP18-4	Peptidyl-prolyl cis-trans isomerase CYP18-4	U0	184.24	87870000
VIPGFMCQGGDFTAK	0	Unmodified					_VIPGFMCQGGDFTAK_							A0A178UWH6	CYP18-4	Peptidyl-prolyl cis-trans isomerase CYP18-4	U0	96.414	13524000
VIPGFMCQGGDFTAK	0	Oxidation (M)				1	_VIPGFM(ox)CQGGDFTAK_			VIPGFM(1)CQGGDFTAK			VIPGFM(139.32)CQGGDFTAK	A0A178UWH6	CYP18-4	Peptidyl-prolyl cis-trans isomerase CYP18-4	U50	139.32	28838000
VIPGFMCQGGDFTAK	0	Unmodified					_VIPGFMCQGGDFTAK_							A0A178UWH6	CYP18-4	Peptidyl-prolyl cis-trans isomerase CYP18-4	U50	189.57	89155000
VIPGFMCQGGDFTAK	0	Unmodified					_VIPGFMCQGGDFTAK_							A0A178UWH6	CYP18-4	Peptidyl-prolyl cis-trans isomerase CYP18-4	U50	78.615	11296000
VVTITDCGQLS	0	Unmodified					_VVTITDCGQLS_							A0A178UWH6	CYP18-4	Peptidyl-prolyl cis-trans isomerase CYP18-4	U0	137.62	114760000
VVTITDCGQLS	0	Unmodified					_VVTITDCGQLS_							A0A178UWH6	CYP18-4	Peptidyl-prolyl cis-trans isomerase CYP18-4	U50	129.77	173030000
KSDSPDSSSSSSSTLESTSSFLAK	1	Unmodified					_KSDSPDSSSSSSSTLESTSSFLAK_							A0A178UWP1	TFCC	Tubulin-folding cofactor C	U50	131.94	67508000
AMTGGYVGQTFFPR	0	Oxidation (M)				1	_AM(ox)TGGYVGQTFFPR_			AM(1)TGGYVGQTFFPR			AM(92.44)TGGYVGQTFFPR	A0A178UX02	RCE1	NEDD8-conjugating enzyme Ubc12	U0	92.445	6474500
AMTGGYVGQTFFPR	0	Oxidation (M)				1	_AM(ox)TGGYVGQTFFPR_							A0A178UX02	RCE1	NEDD8-conjugating enzyme Ubc12	U0	NaN	870710
AMTGGYVGQTFFPR	0	Oxidation (M)				1	_AM(ox)TGGYVGQTFFPR_			AM(1)TGGYVGQTFFPR			AM(157.38)TGGYVGQTFFPR	A0A178UX02	RCE1	NEDD8-conjugating enzyme Ubc12	U50	157.38	37485000
AMTGGYVGQTFFPR	0	Oxidation (M)				1	_AM(ox)TGGYVGQTFFPR_			AM(1)TGGYVGQTFFPR			AM(80.32)TGGYVGQTFFPR	A0A178UX02	RCE1	NEDD8-conjugating enzyme Ubc12	U50	80.318	8088400
AMTGGYVGQTFFPR	0	Unmodified					_AMTGGYVGQTFFPR_							A0A178UX02	RCE1	NEDD8-conjugating enzyme Ubc12	U50	67.952	13195000
DNPKLFETNVRR	2	Unmodified					_DNPKLFETNVRR_							A0A178UX02	RCE1	NEDD8-conjugating enzyme Ubc12	U50	97.911
LFETNVR	0	Unmodified					_LFETNVR_							A0A178UX02	RCE1	NEDD8-conjugating enzyme Ubc12	U0	134.12
LFETNVR	0	Unmodified					_LFETNVR_							A0A178UX02	RCE1	NEDD8-conjugating enzyme Ubc12	U50	105.27	161840000
LFETNVR	0	Unmodified					_LFETNVR_							A0A178UX02	RCE1	NEDD8-conjugating enzyme Ubc12	U50	128.82	1981700
LFETNVRR	1	Unmodified					_LFETNVRR_							A0A178UX02	RCE1	NEDD8-conjugating enzyme Ubc12	U0	NaN	5206700
LFETNVRR	1	Unmodified					_LFETNVRR_							A0A178UX02	RCE1	NEDD8-conjugating enzyme Ubc12	U50	143.94	40476000
RAMTGGYVGQTFFPR	1	Oxidation (M)				1	_RAM(ox)TGGYVGQTFFPR_							A0A178UX02	RCE1	NEDD8-conjugating enzyme Ubc12	U0	NaN	2334000
RAMTGGYVGQTFFPR	1	Unmodified					_RAMTGGYVGQTFFPR_							A0A178UX02	RCE1	NEDD8-conjugating enzyme Ubc12	U0	NaN	1741100
RAMTGGYVGQTFFPR	1	Oxidation (M)				1	_RAM(ox)TGGYVGQTFFPR_			RAM(1)TGGYVGQTFFPR			RAM(88.77)TGGYVGQTFFPR	A0A178UX02	RCE1	NEDD8-conjugating enzyme Ubc12	U50	88.768	17930000
RAMTGGYVGQTFFPR	1	Unmodified					_RAMTGGYVGQTFFPR_							A0A178UX02	RCE1	NEDD8-conjugating enzyme Ubc12	U50	116.58	18360000
HEFYQKPEEAVVTIFAK	1	Unmodified					_HEFYQKPEEAVVTIFAK_							A0A178UX37	SGT1B	Protein SGT1 homolog B	U50	111.01	6998000
FYIQPLSPTEAAAR	0	Unmodified					_FYIQPLSPTEAAAR_							A0A178UX57	PSBQ2	Oxygen-evolving enhancer protein 3-2, chloroplastic	U0	125.74	3586900
LFQTIDNLDYAAR	0	Unmodified					_LFQTIDNLDYAAR_							A0A178UX57	PSBQ2	Oxygen-evolving enhancer protein 3-2, chloroplastic	U0	107.83	2498300
IAEVKGGADEGLSR	1	Unmodified					_IAEVKGGADEGLSR_							A0A178UXJ8	SYNO	Asparagine--tRNA ligase, chloroplastic/mitochondrial	U0	27.263	2355600
IAEVKGGADEGLSR	1	Unmodified					_IAEVKGGADEGLSR_							A0A178UXJ8	SYNO	Asparagine--tRNA ligase, chloroplastic/mitochondrial	U50	69.261	3797500
YYQSVIDEMYK	0	Unmodified					_YYQSVIDEMYK_							A0A178UXP9	LACS4	Long chain acyl-CoA synthetase 4	U0	120.12	3551400
ASSSADNLTDKNIVFR	1	Acetyl (Protein N-term)	1				_(ac)ASSSADNLTDKNIVFR_							A0A178UXQ2	AGD8	Probable ADP-ribosylation factor GTPase-activating protein AGD8	U0	237.87	6342100
ASSSADNLTDKNIVFR	1	Acetyl (Protein N-term)	1				_(ac)ASSSADNLTDKNIVFR_							A0A178UXQ2	AGD8	Probable ADP-ribosylation factor GTPase-activating protein AGD8	U50	NaN	4381800
ASSSADNLTDKNIVFRK	2	Acetyl (Protein N-term)	1				_(ac)ASSSADNLTDKNIVFRK_							A0A178UXQ2	AGD8	Probable ADP-ribosylation factor GTPase-activating protein AGD8	U0	112.8	17975000
ASSSADNLTDKNIVFRK	2	Acetyl (Protein N-term)	1				_(ac)ASSSADNLTDKNIVFRK_							A0A178UXQ2	AGD8	Probable ADP-ribosylation factor GTPase-activating protein AGD8	U50	112.8	10675000
QHGWTDGGKIEAK	1	Unmodified					_QHGWTDGGKIEAK_							A0A178UXQ2	AGD8	Probable ADP-ribosylation factor GTPase-activating protein AGD8	U0	63.181	1409300
QHGWTDGGKIEAK	1	Unmodified					_QHGWTDGGKIEAK_							A0A178UXQ2	AGD8	Probable ADP-ribosylation factor GTPase-activating protein AGD8	U50	NaN	1287000
IIGATNPAASEPGTIR	0	Unmodified					_IIGATNPAASEPGTIR_							A0A178UXQ6	NDK1	Nucleoside diphosphate kinase 1	U0	178.81	10858000
SFAEKHYEDLSSK	1	Unmodified					_SFAEKHYEDLSSK_							A0A178UXQ6	NDK1	Nucleoside diphosphate kinase 1	U0	131.06	6312300
SFAEKHYEDLSSK	1	Unmodified					_SFAEKHYEDLSSK_							A0A178UXQ6	NDK1	Nucleoside diphosphate kinase 1	U50	NaN	1696900
IIARGHYSER	1	Methyl (KR)			1		_IIARGHYSER(me)_		IIAR(0.343)GHYSER(0.657)			IIAR(-2.83)GHYSER(2.83)		A0A178UY32			U0	41.979	1257400000
DIINVKPLIDRK	2	Unmodified					_DIINVKPLIDRK_							A0A178UY46	PSBQ1	Oxygen-evolving enhancer protein 3-1, chloroplastic	U0	63.76	7344200
ESAKDIINVKPLIDR	2	Unmodified					_ESAKDIINVKPLIDR_							A0A178UY46	PSBQ1	Oxygen-evolving enhancer protein 3-1, chloroplastic	U0	54.859	10022000
ESAKDIINVKPLIDR	2	Unmodified					_ESAKDIINVKPLIDR_							A0A178UY46	PSBQ1	Oxygen-evolving enhancer protein 3-1, chloroplastic	U0	85.421	9684100
ESAKDIINVKPLIDR	2	Unmodified					_ESAKDIINVKPLIDR_							A0A178UY46	PSBQ1	Oxygen-evolving enhancer protein 3-1, chloroplastic	U50	NaN	2195000
FYLQPLPPTEAAAR	0	Unmodified					_FYLQPLPPTEAAAR_							A0A178UY46	PSBQ1	Oxygen-evolving enhancer protein 3-1, chloroplastic	U0	145.46	12028000
FYLQPLPPTEAAAR	0	Unmodified					_FYLQPLPPTEAAAR_							A0A178UY46	PSBQ1	Oxygen-evolving enhancer protein 3-1, chloroplastic	U50	105.86	2678900
LFDTIDNLDYAAK	0	Unmodified					_LFDTIDNLDYAAK_							A0A178UY46	PSBQ1	Oxygen-evolving enhancer protein 3-1, chloroplastic	U0	169.93	29355000
LFDTIDNLDYAAK	0	Unmodified					_LFDTIDNLDYAAK_							A0A178UY46	PSBQ1	Oxygen-evolving enhancer protein 3-1, chloroplastic	U50	121.61	6585700
YDLNTIISSKPK	1	Unmodified					_YDLNTIISSKPK_							A0A178UY46	PSBQ1	Oxygen-evolving enhancer protein 3-1, chloroplastic	U0	66.393	9936300
YDLNTIISSKPK	1	Unmodified					_YDLNTIISSKPK_							A0A178UY46	PSBQ1	Oxygen-evolving enhancer protein 3-1, chloroplastic	U50	NaN	1188800
AWPYVQNDLR	0	Unmodified					_AWPYVQNDLR_							A0A178UY46	PSBQ1;PSBQ2	Oxygen-evolving enhancer protein 3-1, chloroplastic;Oxygen-evolving enhancer protein 3-2, chloroplastic	U0	124.98	33573000
AWPYVQNDLR	0	Unmodified					_AWPYVQNDLR_							A0A178UY46	PSBQ1;PSBQ2	Oxygen-evolving enhancer protein 3-1, chloroplastic;Oxygen-evolving enhancer protein 3-2, chloroplastic	U50	86.332	7299500
KAWPYVQNDLR	1	Unmodified					_KAWPYVQNDLR_							A0A178UY46	PSBQ1;PSBQ2	Oxygen-evolving enhancer protein 3-1, chloroplastic;Oxygen-evolving enhancer protein 3-2, chloroplastic	U0	123.86	6167800
KAWPYVQNDLR	1	Unmodified					_KAWPYVQNDLR_							A0A178UY46	PSBQ1;PSBQ2	Oxygen-evolving enhancer protein 3-1, chloroplastic;Oxygen-evolving enhancer protein 3-2, chloroplastic	U0	78.83	27567000
KAWPYVQNDLR	1	Unmodified					_KAWPYVQNDLR_							A0A178UY46	PSBQ1;PSBQ2	Oxygen-evolving enhancer protein 3-1, chloroplastic;Oxygen-evolving enhancer protein 3-2, chloroplastic	U50	NaN	1322700
KAWPYVQNDLR	1	Unmodified					_KAWPYVQNDLR_							A0A178UY46	PSBQ1;PSBQ2	Oxygen-evolving enhancer protein 3-1, chloroplastic;Oxygen-evolving enhancer protein 3-2, chloroplastic	U50	NaN	5224000
VGPPPAPSGGLPGTDNSDQAR	0	Unmodified					_VGPPPAPSGGLPGTDNSDQAR_							A0A178UY46			U0	55.588	22921000
VGPPPAPSGGLPGTDNSDQAR	0	Unmodified					_VGPPPAPSGGLPGTDNSDQAR_							A0A178UY46			U0	180.06	11945000
VGPPPAPSGGLPGTDNSDQAR	0	Unmodified					_VGPPPAPSGGLPGTDNSDQAR_							A0A178UY46			U50	70.413	4591800
VGPPPAPSGGLPGTDNSDQAR	0	Unmodified					_VGPPPAPSGGLPGTDNSDQAR_							A0A178UY46			U50	NaN	2720300
VQPSGVSIYSQDPVLSAR	0	Unmodified					_VQPSGVSIYSQDPVLSAR_							A0A178UZE9	PEP	RNA-binding KH domain-containing protein PEPPER	U0	32.833	4141000
VQPSGVSIYSQDPVLSAR	0	Unmodified					_VQPSGVSIYSQDPVLSAR_							A0A178UZE9	PEP	RNA-binding KH domain-containing protein PEPPER	U50	NaN	4514600
AMEDVLTIK	0	Unmodified					_AMEDVLTIK_							A0A178UZH3	ISU1	Iron-sulfur cluster assembly protein 1	U0	93.429	96523000
AMEDVLTIKNTEIAK	1	Oxidation (M)				1	_AM(ox)EDVLTIKNTEIAK_			AM(1)EDVLTIKNTEIAK			AM(88.56)EDVLTIKNTEIAK	A0A178UZH3	ISU1	Iron-sulfur cluster assembly protein 1	U0	88.561	37187000
AMEDVLTIKNTEIAK	1	Unmodified					_AMEDVLTIKNTEIAK_							A0A178UZH3	ISU1	Iron-sulfur cluster assembly protein 1	U0	128.22	79030000
AMEDVLTIKNTEIAK	1	Unmodified					_AMEDVLTIKNTEIAK_							A0A178UZH3	ISU1	Iron-sulfur cluster assembly protein 1	U0	202	10147000
AMEDVLTIKNTEIAK	1	Oxidation (M)				1	_AM(ox)EDVLTIKNTEIAK_			AM(1)EDVLTIKNTEIAK			AM(62.71)EDVLTIKNTEIAK	A0A178UZH3	ISU1	Iron-sulfur cluster assembly protein 1	U50	62.711	34000000
AMEDVLTIKNTEIAK	1	Unmodified					_AMEDVLTIKNTEIAK_							A0A178UZH3	ISU1	Iron-sulfur cluster assembly protein 1	U50	148.52	74759000
AMEDVLTIKNTEIAK	1	Unmodified					_AMEDVLTIKNTEIAK_							A0A178UZH3	ISU1	Iron-sulfur cluster assembly protein 1	U50	219.92	10601000
FKTFGCGSAIASSSVATEWVK	1	Unmodified					_FKTFGCGSAIASSSVATEWVK_							A0A178UZH3	ISU1	Iron-sulfur cluster assembly protein 1	U0	64.402	3597000
FKTFGCGSAIASSSVATEWVK	1	Unmodified					_FKTFGCGSAIASSSVATEWVK_							A0A178UZH3	ISU1	Iron-sulfur cluster assembly protein 1	U50	72.167	8700700
GKAMEDVLTIK	1	Oxidation (M)				1	_GKAM(ox)EDVLTIK_			GKAM(1)EDVLTIK			GKAM(72.29)EDVLTIK	A0A178UZH3	ISU1	Iron-sulfur cluster assembly protein 1	U0	72.29	11167000
GKAMEDVLTIK	1	Oxidation (M)				1	_GKAM(ox)EDVLTIK_							A0A178UZH3	ISU1	Iron-sulfur cluster assembly protein 1	U50	NaN	6894000
GKAMEDVLTIKNTEIAK	2	Unmodified					_GKAMEDVLTIKNTEIAK_							A0A178UZH3	ISU1	Iron-sulfur cluster assembly protein 1	U0	NaN	10571000
GKAMEDVLTIKNTEIAK	2	Unmodified					_GKAMEDVLTIKNTEIAK_							A0A178UZH3	ISU1	Iron-sulfur cluster assembly protein 1	U50	118.23	11251000
LQIKVDEKTGQIVDAR	2	Unmodified					_LQIKVDEKTGQIVDAR_							A0A178UZH3	ISU1	Iron-sulfur cluster assembly protein 1	U0	63.691	16359000
LQIKVDEKTGQIVDAR	2	Unmodified					_LQIKVDEKTGQIVDAR_							A0A178UZH3	ISU1	Iron-sulfur cluster assembly protein 1	U50	111.11	15639000
NVGSFDKNDPNVGTGLVGAPACGDVMK	1	Oxidation (M)				1	_NVGSFDKNDPNVGTGLVGAPACGDVM(ox)K_			NVGSFDKNDPNVGTGLVGAPACGDVM(1)K			NVGSFDKNDPNVGTGLVGAPACGDVM(43.26)K	A0A178UZH3	ISU1	Iron-sulfur cluster assembly protein 1	U0	43.256	7378600
NVGSFDKNDPNVGTGLVGAPACGDVMK	1	Unmodified					_NVGSFDKNDPNVGTGLVGAPACGDVMK_							A0A178UZH3	ISU1	Iron-sulfur cluster assembly protein 1	U0	76.777	14812000
NVGSFDKNDPNVGTGLVGAPACGDVMK	1	Oxidation (M)				1	_NVGSFDKNDPNVGTGLVGAPACGDVM(ox)K_							A0A178UZH3	ISU1	Iron-sulfur cluster assembly protein 1	U50	NaN	6737700
NVGSFDKNDPNVGTGLVGAPACGDVMK	1	Unmodified					_NVGSFDKNDPNVGTGLVGAPACGDVMK_							A0A178UZH3	ISU1	Iron-sulfur cluster assembly protein 1	U50	91.786	20356000
TFGCGSAIASSSVATEWVK	0	Unmodified					_TFGCGSAIASSSVATEWVK_							A0A178UZH3	ISU1	Iron-sulfur cluster assembly protein 1	U0	108.71	2611900
TFGCGSAIASSSVATEWVK	0	Unmodified					_TFGCGSAIASSSVATEWVK_							A0A178UZH3	ISU1	Iron-sulfur cluster assembly protein 1	U50	NaN	3285800
VDEKTGQIVDAR	1	Unmodified					_VDEKTGQIVDAR_							A0A178UZH3	ISU1	Iron-sulfur cluster assembly protein 1	U0	138.02	69934000
VDEKTGQIVDAR	1	Unmodified					_VDEKTGQIVDAR_							A0A178UZH3	ISU1	Iron-sulfur cluster assembly protein 1	U50	145.29	54557000
HLSLPPVK	0	Unmodified					_HLSLPPVK_							A0A178UZH3	ISU1;ISU3	Iron-sulfur cluster assembly protein 1;Iron-sulfur cluster assembly protein 3	U0	93.561	13905000
HLSLPPVK	0	Unmodified					_HLSLPPVK_							A0A178UZH3	ISU1;ISU3	Iron-sulfur cluster assembly protein 1;Iron-sulfur cluster assembly protein 3	U50	112.37	9415700
LHCSMLAEDAIK	0	Oxidation (M)				1	_LHCSM(ox)LAEDAIK_			LHCSM(1)LAEDAIK			LHCSM(81.62)LAEDAIK	A0A178UZH3	ISU1;ISU3;ISU2	Iron-sulfur cluster assembly protein 1;Iron-sulfur cluster assembly protein 3;Iron-sulfur cluster assembly protein 2	U0	81.625	6619200
LHCSMLAEDAIK	0	Unmodified					_LHCSMLAEDAIK_							A0A178UZH3	ISU1;ISU3;ISU2	Iron-sulfur cluster assembly protein 1;Iron-sulfur cluster assembly protein 3;Iron-sulfur cluster assembly protein 2	U0	89.805	27383000
LHCSMLAEDAIK	0	Unmodified					_LHCSMLAEDAIK_							A0A178UZH3	ISU1;ISU3;ISU2	Iron-sulfur cluster assembly protein 1;Iron-sulfur cluster assembly protein 3;Iron-sulfur cluster assembly protein 2	U0	176.48	6981400
LHCSMLAEDAIK	0	Oxidation (M)				1	_LHCSM(ox)LAEDAIK_			LHCSM(1)LAEDAIK			LHCSM(84.48)LAEDAIK	A0A178UZH3	ISU1;ISU3;ISU2	Iron-sulfur cluster assembly protein 1;Iron-sulfur cluster assembly protein 3;Iron-sulfur cluster assembly protein 2	U50	84.479
LHCSMLAEDAIK	0	Unmodified					_LHCSMLAEDAIK_							A0A178UZH3	ISU1;ISU3;ISU2	Iron-sulfur cluster assembly protein 1;Iron-sulfur cluster assembly protein 3;Iron-sulfur cluster assembly protein 2	U50	184.71	5902500
LHCSMLAEDAIK	0	Unmodified					_LHCSMLAEDAIK_							A0A178UZH3	ISU1;ISU3;ISU2	Iron-sulfur cluster assembly protein 1;Iron-sulfur cluster assembly protein 3;Iron-sulfur cluster assembly protein 2	U50	NaN	19668000
ATTGTAAVATGTSTVK	0	Acetyl (Protein N-term)	1				_(ac)ATTGTAAVATGTSTVK_							A0A178V059		Uncharacterized protein At4g28440	U0	293.31	31462000
ATTGTAAVATGTSTVK	0	Acetyl (Protein N-term)	1				_(ac)ATTGTAAVATGTSTVK_							A0A178V059		Uncharacterized protein At4g28440	U50	266.74	21898000
ATTGTAAVATGTSTVKR	1	Acetyl (Protein N-term)	1				_(ac)ATTGTAAVATGTSTVKR_							A0A178V059		Uncharacterized protein At4g28440	U0	281.25	7792400
ATTGTAAVATGTSTVKR	1	Acetyl (Protein N-term)	1				_(ac)ATTGTAAVATGTSTVKR_							A0A178V059		Uncharacterized protein At4g28440	U50	253.88	5579900
LGVDKWGR	1	Unmodified					_LGVDKWGR_							A0A178V059		Uncharacterized protein At4g28440	U0	116.3	4986300
LGVDKWGR	1	Unmodified					_LGVDKWGR_							A0A178V059		Uncharacterized protein At4g28440	U50	178.08	50098000
NDQVDLMK	0	Unmodified					_NDQVDLMK_							A0A178V059	F11M21.26;F5O8.30	Uncharacterized protein At4g28440	U0	106.36	11435000
NDQVDLMK	0	Unmodified					_NDQVDLMK_							A0A178V059	F11M21.26;F5O8.30	Uncharacterized protein At4g28440	U50	106.04	8614100
NDQVDLMKPGATVILR	1	Oxidation (M)				1	_NDQVDLM(ox)KPGATVILR_			NDQVDLM(1)KPGATVILR			NDQVDLM(91.46)KPGATVILR	A0A178V059		Uncharacterized protein At4g28440	U0	91.457	23194000
NDQVDLMKPGATVILR	1	Oxidation (M)				1	_NDQVDLM(ox)KPGATVILR_							A0A178V059		Uncharacterized protein At4g28440	U0	NaN	1471900
NDQVDLMKPGATVILR	1	Unmodified					_NDQVDLMKPGATVILR_							A0A178V059		Uncharacterized protein At4g28440	U0	79.837	24425000
NDQVDLMKPGATVILR	1	Unmodified					_NDQVDLMKPGATVILR_							A0A178V059		Uncharacterized protein At4g28440	U0	163.51	3507100
NDQVDLMKPGATVILR	1	Oxidation (M)				1	_NDQVDLM(ox)KPGATVILR_			NDQVDLM(1)KPGATVILR			NDQVDLM(98.51)KPGATVILR	A0A178V059		Uncharacterized protein At4g28440	U50	98.507	150760000
NDQVDLMKPGATVILR	1	Oxidation (M)				1	_NDQVDLM(ox)KPGATVILR_			NDQVDLM(1)KPGATVILR			NDQVDLM(202.61)KPGATVILR	A0A178V059		Uncharacterized protein At4g28440	U50	202.61	12859000
NDQVDLMKPGATVILR	1	Unmodified					_NDQVDLMKPGATVILR_							A0A178V059		Uncharacterized protein At4g28440	U50	92.319	214950000
NDQVDLMKPGATVILR	1	Unmodified					_NDQVDLMKPGATVILR_							A0A178V059		Uncharacterized protein At4g28440	U50	202.29	26507000
NSRIDMFKGTMR	2	Unmodified					_NSRIDMFKGTMR_							A0A178V059		Uncharacterized protein At4g28440	U50	45.654	28239000
TRPASSLSRPSQPSR	2	Unmodified					_TRPASSLSRPSQPSR_							A0A178V059		Uncharacterized protein At4g28440	U0	165.49	4023400
TRPASSLSRPSQPSR	2	Unmodified					_TRPASSLSRPSQPSR_							A0A178V059		Uncharacterized protein At4g28440	U0	103.6	3097100
TRPASSLSRPSQPSR	2	Unmodified					_TRPASSLSRPSQPSR_							A0A178V059		Uncharacterized protein At4g28440	U50	148.33	60232000
TRPASSLSRPSQPSR	2	Unmodified					_TRPASSLSRPSQPSR_							A0A178V059		Uncharacterized protein At4g28440	U50	216.34	37655000
VEQLKPGTTGHTLTVK	1	Unmodified					_VEQLKPGTTGHTLTVK_							A0A178V059		Uncharacterized protein At4g28440	U0	52.93	25846000
VEQLKPGTTGHTLTVK	1	Unmodified					_VEQLKPGTTGHTLTVK_							A0A178V059		Uncharacterized protein At4g28440	U0	61.815	12877000
VEQLKPGTTGHTLTVK	1	Unmodified					_VEQLKPGTTGHTLTVK_							A0A178V059		Uncharacterized protein At4g28440	U50	98.281	206410000
VEQLKPGTTGHTLTVK	1	Unmodified					_VEQLKPGTTGHTLTVK_							A0A178V059		Uncharacterized protein At4g28440	U50	131.18	105070000
VIEANIVVPVTR	0	Unmodified					_VIEANIVVPVTR_							A0A178V059		Uncharacterized protein At4g28440	U0	154.24	31998000
VIEANIVVPVTR	0	Unmodified					_VIEANIVVPVTR_							A0A178V059		Uncharacterized protein At4g28440	U0	102.97	5033200
VIEANIVVPVTR	0	Unmodified					_VIEANIVVPVTR_							A0A178V059		Uncharacterized protein At4g28440	U50	175.15	224280000
VIEANIVVPVTR	0	Unmodified					_VIEANIVVPVTR_							A0A178V059		Uncharacterized protein At4g28440	U50	100.22	28783000
VIEANIVVPVTRK	1	Unmodified					_VIEANIVVPVTRK_							A0A178V059		Uncharacterized protein At4g28440	U0	NaN	2667000
VIEANIVVPVTRK	1	Unmodified					_VIEANIVVPVTRK_							A0A178V059		Uncharacterized protein At4g28440	U0	NaN	26125000
VIEANIVVPVTRK	1	Unmodified					_VIEANIVVPVTRK_							A0A178V059		Uncharacterized protein At4g28440	U50	111.38	271610000
VIEANIVVPVTRK	1	Unmodified					_VIEANIVVPVTRK_							A0A178V059		Uncharacterized protein At4g28440	U50	177.44	27118000
SELDSQVPTAFDPFADANAEDSGAGTKEYVHIR	1	Acetyl (Protein N-term)	1				_(ac)SELDSQVPTAFDPFADANAEDSGAGTKEYVHIR_							A0A178V093		Protein translation factor SUI1 homolog 1	U0	NaN	21004000
SELDSQVPTAFDPFADANAEDSGAGTKEYVHIR	1	Acetyl (Protein N-term)	1				_(ac)SELDSQVPTAFDPFADANAEDSGAGTKEYVHIR_							A0A178V093		Protein translation factor SUI1 homolog 1	U50	182.51	25927000
SLTTVQGLKKEYSYTK	2	Unmodified					_SLTTVQGLKKEYSYTK_							A0A178V093	At5g54760	Protein translation factor SUI1 homolog 1	U0	NaN	613130000
SLTTVQGLKKEYSYTK	2	Unmodified					_SLTTVQGLKKEYSYTK_							A0A178V093	At5g54760	Protein translation factor SUI1 homolog 1	U50	136.39	50623000
SLTTVQGLKKEYSYTK	2	Unmodified					_SLTTVQGLKKEYSYTK_							A0A178V093	At5g54760	Protein translation factor SUI1 homolog 1	U50	134.14	41666000
DNIKIHGF	1	Unmodified					_DNIKIHGF_							A0A178V093	At5g54760	Protein translation factor SUI1 homolog 1;Protein translation factor SUI1 homolog 2	U0	146.94	922070000
DNIKIHGF	1	Unmodified					_DNIKIHGF_							A0A178V093	At5g54760	Protein translation factor SUI1 homolog 1;Protein translation factor SUI1 homolog 2	U50	138.37	74998000
KDNIKIHGF	2	Unmodified					_KDNIKIHGF_							A0A178V093	At5g54760	Protein translation factor SUI1 homolog 1;Protein translation factor SUI1 homolog 2	U0	154.71	17395000
KNVSTFLVQAGLVK	1	Unmodified					_KNVSTFLVQAGLVK_							A0A178V093	At5g54760	Protein translation factor SUI1 homolog 1;Protein translation factor SUI1 homolog 2	U0	117.07	169950000
KNVSTFLVQAGLVK	1	Unmodified					_KNVSTFLVQAGLVK_							A0A178V093	At5g54760	Protein translation factor SUI1 homolog 1;Protein translation factor SUI1 homolog 2	U50	NaN	11706000
KNVSTFLVQAGLVKK	2	Unmodified					_KNVSTFLVQAGLVKK_							A0A178V093	At5g54760	Protein translation factor SUI1 homolog 1;Protein translation factor SUI1 homolog 2	U0	142.1	374280000
KNVSTFLVQAGLVKK	2	Unmodified					_KNVSTFLVQAGLVKK_							A0A178V093	At5g54760	Protein translation factor SUI1 homolog 1;Protein translation factor SUI1 homolog 2	U0	91.307	167350000
KNVSTFLVQAGLVKK	2	Unmodified					_KNVSTFLVQAGLVKK_							A0A178V093	At5g54760	Protein translation factor SUI1 homolog 1;Protein translation factor SUI1 homolog 2	U0	369.05	15645000
KNVSTFLVQAGLVKK	2	Unmodified					_KNVSTFLVQAGLVKK_							A0A178V093	At5g54760	Protein translation factor SUI1 homolog 1;Protein translation factor SUI1 homolog 2	U50	92.265	28846000
KNVSTFLVQAGLVKK	2	Unmodified					_KNVSTFLVQAGLVKK_							A0A178V093	At5g54760	Protein translation factor SUI1 homolog 1;Protein translation factor SUI1 homolog 2	U50	87.083	12977000
KSLTTVQGLKK	2	Unmodified					_KSLTTVQGLKK_							A0A178V093	At5g54940;At5g54760	Protein translation factor SUI1 homolog 1;Protein translation factor SUI1 homolog 2	U0	127.52	91784000
KSLTTVQGLKK	2	Unmodified					_KSLTTVQGLKK_							A0A178V093	At5g54940;At5g54760	Protein translation factor SUI1 homolog 1;Protein translation factor SUI1 homolog 2	U0	173.28	4540700
NVSTFLVQAGLVK	0	Unmodified					_NVSTFLVQAGLVK_							A0A178V093	At5g54760	Protein translation factor SUI1 homolog 1;Protein translation factor SUI1 homolog 2	U0	133.83	213790000
NVSTFLVQAGLVK	0	Unmodified					_NVSTFLVQAGLVK_							A0A178V093	At5g54760	Protein translation factor SUI1 homolog 1;Protein translation factor SUI1 homolog 2	U0	118.87	39000000
NVSTFLVQAGLVK	0	Unmodified					_NVSTFLVQAGLVK_							A0A178V093	At5g54760	Protein translation factor SUI1 homolog 1;Protein translation factor SUI1 homolog 2	U50	104.42
NVSTFLVQAGLVK	0	Unmodified					_NVSTFLVQAGLVK_							A0A178V093	At5g54760	Protein translation factor SUI1 homolog 1;Protein translation factor SUI1 homolog 2	U50	NaN	7853700
NVSTFLVQAGLVKK	1	Unmodified					_NVSTFLVQAGLVKK_							A0A178V093	At5g54760	Protein translation factor SUI1 homolog 1;Protein translation factor SUI1 homolog 2	U0	94.688	756660000
NVSTFLVQAGLVKK	1	Unmodified					_NVSTFLVQAGLVKK_							A0A178V093	At5g54760	Protein translation factor SUI1 homolog 1;Protein translation factor SUI1 homolog 2	U0	133.91	156740000
NVSTFLVQAGLVKK	1	Unmodified					_NVSTFLVQAGLVKK_							A0A178V093	At5g54760	Protein translation factor SUI1 homolog 1;Protein translation factor SUI1 homolog 2	U50	99.531	73229000
NVSTFLVQAGLVKKDNIK	2	Unmodified					_NVSTFLVQAGLVKKDNIK_							A0A178V093	At5g54760	Protein translation factor SUI1 homolog 1;Protein translation factor SUI1 homolog 2	U0	120.9	143600000
NVSTFLVQAGLVKKDNIK	2	Unmodified					_NVSTFLVQAGLVKKDNIK_							A0A178V093	At5g54760	Protein translation factor SUI1 homolog 1;Protein translation factor SUI1 homolog 2	U0	103.87	63731000
NVSTFLVQAGLVKKDNIK	2	Unmodified					_NVSTFLVQAGLVKKDNIK_							A0A178V093	At5g54760	Protein translation factor SUI1 homolog 1;Protein translation factor SUI1 homolog 2	U50	109.38	6970900
SLTTVQGLK	0	Unmodified					_SLTTVQGLK_							A0A178V093	At5g54940;At5g54760	Protein translation factor SUI1 homolog 1;Protein translation factor SUI1 homolog 2	U0	133.6	539610000
SLTTVQGLK	0	Unmodified					_SLTTVQGLK_							A0A178V093	At5g54940;At5g54760	Protein translation factor SUI1 homolog 1;Protein translation factor SUI1 homolog 2	U50	100.39	33730000
SLTTVQGLKK	1	Unmodified					_SLTTVQGLKK_							A0A178V093	At5g54940;At5g54760	Protein translation factor SUI1 homolog 1;Protein translation factor SUI1 homolog 2	U0	167.04	787040000
SLTTVQGLKK	1	Unmodified					_SLTTVQGLKK_							A0A178V093	At5g54940;At5g54760	Protein translation factor SUI1 homolog 1;Protein translation factor SUI1 homolog 2	U50	136.8	50385000
VHRYVVYKLEEK	2	Unmodified					_VHRYVVYKLEEK_							A0A178V0D2	ADF9	Actin-depolymerizing factor 9	U0	51.463	2960300
VHRYVVYKLEEK	2	Unmodified					_VHRYVVYKLEEK_							A0A178V0D2	ADF9	Actin-depolymerizing factor 9	U50	NaN	2126100
TTTQCVAFK	0	Unmodified					_TTTQCVAFK_							A0A178V0H0	PVA13	Vesicle-associated protein 1-3;Vesicle-associated protein 1-3, N-terminally processed	U50	139.28	5446100
FAPTTSPLSIEK	0	Unmodified					_FAPTTSPLSIEK_							A0A178V0M2	GPX6	Probable phospholipid hydroperoxide glutathione peroxidase 6, mitochondrial	U50	82.029	4953700
FLVDKDGNVVDR	1	Unmodified					_FLVDKDGNVVDR_							A0A178V0M2	GPX6	Probable phospholipid hydroperoxide glutathione peroxidase 6, mitochondrial	U0	NaN	6957000
FLVDKDGNVVDR	1	Unmodified					_FLVDKDGNVVDR_							A0A178V0M2	GPX6	Probable phospholipid hydroperoxide glutathione peroxidase 6, mitochondrial	U50	118.61	19125000
GNDVDLSIYKGK	1	Unmodified					_GNDVDLSIYKGK_							A0A178V0M2	GPX6	Probable phospholipid hydroperoxide glutathione peroxidase 6, mitochondrial	U50	29.809	12585000
SLYDFTVKDAK	1	Unmodified					_SLYDFTVKDAK_							A0A178V0M2	GPX6	Probable phospholipid hydroperoxide glutathione peroxidase 6, mitochondrial	U0	48.948	4202100
SLYDFTVKDAK	1	Unmodified					_SLYDFTVKDAK_							A0A178V0M2	GPX6	Probable phospholipid hydroperoxide glutathione peroxidase 6, mitochondrial	U50	75.695	11813000
QLGAVEGPLEHPSSSR	0	Unmodified					_QLGAVEGPLEHPSSSR_							A0A178V1P5	PUX3	Plant UBX domain-containing protein 3	U0	NaN	2828700
QLGAVEGPLEHPSSSR	0	Unmodified					_QLGAVEGPLEHPSSSR_							A0A178V1P5	PUX3	Plant UBX domain-containing protein 3	U50	70.281	9704000
IGAPAMTSR	0	Unmodified					_IGAPAMTSR_							A0A178V1X0	SHM4	Serine hydroxymethyltransferase 4	U50	110.31	2994100
CYECGETGHFAR	0	Unmodified					_CYECGETGHFAR_							A0A178V2N6	RSZ22	Serine/arginine-rich splicing factor RSZ22	U0	125.72	3708600
VTERELEDEFR	1	Unmodified					_VTERELEDEFR_							A0A178V2N6	RSZ22A;RSZ22	Serine/arginine-rich splicing factor RSZ22A;Serine/arginine-rich splicing factor RSZ22	U0	103.44	4698600
VTERELEDEFR	1	Unmodified					_VTERELEDEFR_							A0A178V2N6	RSZ22A;RSZ22	Serine/arginine-rich splicing factor RSZ22A;Serine/arginine-rich splicing factor RSZ22	U50	NaN	2183200
GFMNNEGFVPLR	0	Oxidation (M)				1	_GFM(ox)NNEGFVPLR_			GFM(1)NNEGFVPLR			GFM(106.42)NNEGFVPLR	A0A178V2U1	LARP1C	La-related protein 1C	U0	106.42	2924800
GFMNNEGFVPLR	0	Unmodified					_GFMNNEGFVPLR_							A0A178V2U1	LARP1C	La-related protein 1C	U0	161.92	13763000
GFMNNEGFVPLR	0	Oxidation (M)				1	_GFM(ox)NNEGFVPLR_							A0A178V2U1	LARP1C	La-related protein 1C	U50	NaN	1047800
NPTGSGPQSVDRADAVAK	1	Unmodified					_NPTGSGPQSVDRADAVAK_							A0A178V2U1	LARP1C	La-related protein 1C	U0	80.316	5863000
NPTGSGPQSVDRADAVAK	1	Unmodified					_NPTGSGPQSVDRADAVAK_							A0A178V2U1	LARP1C	La-related protein 1C	U50	53.647	3540200
NPTGSGPQSVDRADAVAKR	2	Unmodified					_NPTGSGPQSVDRADAVAKR_							A0A178V2U1	LARP1C	La-related protein 1C	U0	165.66	5835800
NPTGSGPQSVDRADAVAKR	2	Unmodified					_NPTGSGPQSVDRADAVAKR_							A0A178V2U1	LARP1C	La-related protein 1C	U0	94.856	3100300
NPTGSGPQSVDRADAVAKR	2	Unmodified					_NPTGSGPQSVDRADAVAKR_							A0A178V2U1	LARP1C	La-related protein 1C	U50	NaN	3626600
RNPTGSGPQSVDRADAVAK	2	Unmodified					_RNPTGSGPQSVDRADAVAK_							A0A178V2U1	LARP1C	La-related protein 1C	U0	100.02	4523200
RNPTGSGPQSVDRADAVAK	2	Unmodified					_RNPTGSGPQSVDRADAVAK_							A0A178V2U1	LARP1C	La-related protein 1C	U0	NaN	5856600
RNPTGSGPQSVDRADAVAK	2	Unmodified					_RNPTGSGPQSVDRADAVAK_							A0A178V2U1	LARP1C	La-related protein 1C	U50	115.34	4152500
RNPTGSGPQSVDRADAVAK	2	Unmodified					_RNPTGSGPQSVDRADAVAK_							A0A178V2U1	LARP1C	La-related protein 1C	U50	32.121	3163600
VRDKMNELAK	2	Oxidation (M),Methyl (KR)			1	1	_VRDK(me)M(ox)NELAK_		VR(0.014)DK(0.973)MNELAK(0.013)	VRDKM(1)NELAK		VR(-18.42)DK(18.42)MNELAK(-18.9)	VRDKM(41.8)NELAK	A0A178V2Y1	At4g02195;SYP42	Syntaxin-42	U50	41.796	20957000
EFNLANPDNK	0	Unmodified					_EFNLANPDNK_							A0A178V4H6	HMGB5	High mobility group B protein 5	U0	117.81	247430000
EFNLANPDNK	0	Unmodified					_EFNLANPDNK_							A0A178V4H6	HMGB5	High mobility group B protein 5	U50	149.19	236220000
EFNLANPDNKSVGNVGR	1	Unmodified					_EFNLANPDNKSVGNVGR_							A0A178V4H6	HMGB5	High mobility group B protein 5	U0	128.74	50776000
EFNLANPDNKSVGNVGR	1	Unmodified					_EFNLANPDNKSVGNVGR_							A0A178V4H6	HMGB5	High mobility group B protein 5	U0	NaN	2626000
EFNLANPDNKSVGNVGR	1	Unmodified					_EFNLANPDNKSVGNVGR_							A0A178V4H6	HMGB5	High mobility group B protein 5	U50	133.87	77421000
EFNLANPDNKSVGNVGR	1	Unmodified					_EFNLANPDNKSVGNVGR_							A0A178V4H6	HMGB5	High mobility group B protein 5	U50	190.1	6023200
KTEYAVTMQQYNMELANGNK	1	Oxidation (M)				1	_KTEYAVTM(ox)QQYNMELANGNK_			KTEYAVTM(1)QQYNMELANGNK			KTEYAVTM(68.22)QQYNM(-68.22)ELANGNK	A0A178V4H6	HMGB5	High mobility group B protein 5	U0	103.9	8792200
KTEYAVTMQQYNMELANGNK	1	Unmodified					_KTEYAVTMQQYNMELANGNK_							A0A178V4H6	HMGB5	High mobility group B protein 5	U0	164.97	13242000
KTEYAVTMQQYNMELANGNK	1	Oxidation (M)				1	_KTEYAVTM(ox)QQYNMELANGNK_							A0A178V4H6	HMGB5	High mobility group B protein 5	U50	NaN	6998300
KTEYAVTMQQYNMELANGNK	1	Unmodified					_KTEYAVTMQQYNMELANGNK_							A0A178V4H6	HMGB5	High mobility group B protein 5	U50	145.17	15026000
MKDNQTEVESR	1	Acetyl (Protein N-term)	1				_(ac)MKDNQTEVESR_							A0A178V4H6	HMGB5	High mobility group B protein 5	U0	NaN	3151200
MKDNQTEVESR	1	Acetyl (Protein N-term)	1				_(ac)MKDNQTEVESR_							A0A178V4H6	HMGB5	High mobility group B protein 5	U50	163.64	4175900
TMTEEERAPFVAK	1	Oxidation (M)				1	_TM(ox)TEEERAPFVAK_			TM(1)TEEERAPFVAK			TM(110.92)TEEERAPFVAK	A0A178V4H6	HMGB5	High mobility group B protein 5	U0	110.92	184150000
TMTEEERAPFVAK	1	Oxidation (M)				1	_TM(ox)TEEERAPFVAK_			TM(1)TEEERAPFVAK			TM(134.3)TEEERAPFVAK	A0A178V4H6	HMGB5	High mobility group B protein 5	U0	134.3	13692000
TMTEEERAPFVAK	1	Unmodified					_TMTEEERAPFVAK_							A0A178V4H6	HMGB5	High mobility group B protein 5	U0	104.17	648340000
TMTEEERAPFVAK	1	Unmodified					_TMTEEERAPFVAK_							A0A178V4H6	HMGB5	High mobility group B protein 5	U0	186.02	75573000
TMTEEERAPFVAK	1	Oxidation (M)				1	_TM(ox)TEEERAPFVAK_			TM(1)TEEERAPFVAK			TM(107.17)TEEERAPFVAK	A0A178V4H6	HMGB5	High mobility group B protein 5	U50	107.17	257960000
TMTEEERAPFVAK	1	Oxidation (M)				1	_TM(ox)TEEERAPFVAK_			TM(1)TEEERAPFVAK			TM(160.88)TEEERAPFVAK	A0A178V4H6	HMGB5	High mobility group B protein 5	U50	160.88	18765000
TMTEEERAPFVAK	1	Unmodified					_TMTEEERAPFVAK_							A0A178V4H6	HMGB5	High mobility group B protein 5	U50	97.463	978450000
TMTEEERAPFVAK	1	Unmodified					_TMTEEERAPFVAK_							A0A178V4H6	HMGB5	High mobility group B protein 5	U50	245.13	120390000
TMTEEERAPFVAKSQSK	2	Oxidation (M)				1	_TM(ox)TEEERAPFVAKSQSK_			TM(1)TEEERAPFVAKSQSK			TM(132.51)TEEERAPFVAKSQSK	A0A178V4H6	HMGB5	High mobility group B protein 5	U0	132.51	4398100
TMTEEERAPFVAKSQSK	2	Unmodified					_TMTEEERAPFVAKSQSK_							A0A178V4H6	HMGB5	High mobility group B protein 5	U0	62.475	13377000
TMTEEERAPFVAKSQSK	2	Unmodified					_TMTEEERAPFVAKSQSK_							A0A178V4H6	HMGB5	High mobility group B protein 5	U0	158.45	6126800
TMTEEERAPFVAKSQSK	2	Oxidation (M)				1	_TM(ox)TEEERAPFVAKSQSK_			TM(1)TEEERAPFVAKSQSK			TM(93.43)TEEERAPFVAKSQSK	A0A178V4H6	HMGB5	High mobility group B protein 5	U50	93.427	15343000
TMTEEERAPFVAKSQSK	2	Oxidation (M)				1	_TM(ox)TEEERAPFVAKSQSK_			TM(1)TEEERAPFVAKSQSK			TM(65.27)TEEERAPFVAKSQSK	A0A178V4H6	HMGB5	High mobility group B protein 5	U50	65.265	5037600
TMTEEERAPFVAKSQSK	2	Unmodified					_TMTEEERAPFVAKSQSK_							A0A178V4H6	HMGB5	High mobility group B protein 5	U50	94.639	52473000
WKTMTEEERAPFVAK	2	Unmodified					_WKTMTEEERAPFVAK_							A0A178V4H6	HMGB5	High mobility group B protein 5	U0	58.079	27862000
WKTMTEEERAPFVAK	2	Unmodified					_WKTMTEEERAPFVAK_							A0A178V4H6	HMGB5	High mobility group B protein 5	U0	62.861	16133000
WKTMTEEERAPFVAK	2	Unmodified					_WKTMTEEERAPFVAK_							A0A178V4H6	HMGB5	High mobility group B protein 5	U50	78.069	53637000
WKTMTEEERAPFVAK	2	Unmodified					_WKTMTEEERAPFVAK_							A0A178V4H6	HMGB5	High mobility group B protein 5	U50	53.008	22139000
WKTMTEEERAPFVAK	2	Oxidation (M)				1	_WKTM(ox)TEEERAPFVAK_			WKTM(1)TEEERAPFVAK			WKTM(64.84)TEEERAPFVAK	A0A178V4H6	HMGB5	High mobility group B protein 5	U50	64.842	44982000
FSPSQIGANVLTK	0	Unmodified					_FSPSQIGANVLTK_							A0A178V4S0	HSP70-9	Heat shock 70 kDa protein 9, mitochondrial	U0	101.3	5768400
QAVTNPTNTIFGSK	0	Unmodified					_QAVTNPTNTIFGSK_							A0A178V4S0	HSP70-9	Heat shock 70 kDa protein 9, mitochondrial	U0	98.105	3771100
MKETAEAYLGK	1	Unmodified					_MKETAEAYLGK_							A0A178V4S0	HSP70-9;BIP2;MED37F;MED37A;HSP70-10	Heat shock 70 kDa protein 9, mitochondrial;Mediator of RNA polymerase II transcription subunit 37f;Mediator of RNA polymerase II transcription subunit 37a;Heat shock 70 kDa protein 10, mitochondrial	U0	41.56	6948100
MKETAEAYLGK	1	Unmodified					_MKETAEAYLGK_							A0A178V4S0	HSP70-9;BIP2;MED37F;MED37A;HSP70-10	Heat shock 70 kDa protein 9, mitochondrial;Mediator of RNA polymerase II transcription subunit 37f;Mediator of RNA polymerase II transcription subunit 37a;Heat shock 70 kDa protein 10, mitochondrial	U50	NaN	1692600
AAAPTDKNYFIGR	1	Unmodified					_AAAPTDKNYFIGR_							A0A178V535	RAP74	Transcription initiation factor IIF subunit alpha	U50	87.498	21356000
FVTGLPNFK	0	Unmodified					_FVTGLPNFK_							A0A178V535	RAP74	Transcription initiation factor IIF subunit alpha	U50	92.187	4689000
KQVTTQDLVSR	1	Unmodified					_KQVTTQDLVSR_							A0A178V535	RAP74	Transcription initiation factor IIF subunit alpha	U0	63.091	2798300
QVTTQDLVSR	0	Unmodified					_QVTTQDLVSR_							A0A178V535	RAP74	Transcription initiation factor IIF subunit alpha	U0	83.358	2190000
GDLTPEELKER	1	Unmodified					_GDLTPEELKER_							A0A178V564	HOP3;HOP2;HOP1	Hsp70-Hsp90 organizing protein 3;Hsp70-Hsp90 organizing protein 2;Hsp70-Hsp90 organizing protein 1	U0	55.04	5474600
GDLTPEELKER	1	Unmodified					_GDLTPEELKER_							A0A178V564	HOP3;HOP2;HOP1	Hsp70-Hsp90 organizing protein 3;Hsp70-Hsp90 organizing protein 2;Hsp70-Hsp90 organizing protein 1	U50	NaN	3759300
GVTVSDVRGFGAQGGSTER	1	Unmodified					_GVTVSDVRGFGAQGGSTER_							A0A178V601	GLB1	Nitrogen regulatory protein P-II homolog	U0	47.568	38224000
GVTVSDVRGFGAQGGSTER	1	Unmodified					_GVTVSDVRGFGAQGGSTER_							A0A178V601	GLB1	Nitrogen regulatory protein P-II homolog	U50	NaN	21755000
HGGSEFSEDKFVAK	1	Unmodified					_HGGSEFSEDKFVAK_							A0A178V601	GLB1	Nitrogen regulatory protein P-II homolog	U0	183.85
HGGSEFSEDKFVAK	1	Unmodified					_HGGSEFSEDKFVAK_							A0A178V601	GLB1	Nitrogen regulatory protein P-II homolog	U0	NaN	137490000
HGGSEFSEDKFVAK	1	Unmodified					_HGGSEFSEDKFVAK_							A0A178V601	GLB1	Nitrogen regulatory protein P-II homolog	U50	188.96	20361000
IFVLPVSDVIR	0	Unmodified					_IFVLPVSDVIR_							A0A178V601	GLB1	Nitrogen regulatory protein P-II homolog	U0	83.456	9988000
IQQVSSALLK	0	Unmodified					_IQQVSSALLK_							A0A178V601	GLB1	Nitrogen regulatory protein P-II homolog	U0	155.07	191560000
IQQVSSALLK	0	Unmodified					_IQQVSSALLK_							A0A178V601	GLB1	Nitrogen regulatory protein P-II homolog	U50	138.4	23440000
VEAIVRPWR	1	Unmodified					_VEAIVRPWR_							A0A178V601	GLB1	Nitrogen regulatory protein P-II homolog	U0	127.56	6928400
FSGRGESGPGHVSNFGDSATAR	1	Unmodified					_FSGRGESGPGHVSNFGDSATAR_							A0A178V6T0		Zinc finger CCCH domain-containing protein 36	U0	184.84	30254000
FSGRGESGPGHVSNFGDSATAR	1	Unmodified					_FSGRGESGPGHVSNFGDSATAR_							A0A178V6T0		Zinc finger CCCH domain-containing protein 36	U50	166.69	19554000
KPPGGGLGGGGGMGSEGKPHPGSNFK	2	Oxidation (M)				1	_KPPGGGLGGGGGM(ox)GSEGKPHPGSNFK_			KPPGGGLGGGGGM(1)GSEGKPHPGSNFK			KPPGGGLGGGGGM(45.86)GSEGKPHPGSNFK	A0A178V6T0		Zinc finger CCCH domain-containing protein 36	U0	45.862	3180800
KPPGGGLGGGGGMGSEGKPHPGSNFK	2	Oxidation (M)				1	_KPPGGGLGGGGGM(ox)GSEGKPHPGSNFK_							A0A178V6T0		Zinc finger CCCH domain-containing protein 36	U50	NaN	1864200
QIYLTFPADSR	0	Unmodified					_QIYLTFPADSR_							A0A178V724		Zinc finger CCCH domain-containing protein 46	U0	85.862	2413300
QIYLTFPADSR	0	Unmodified					_QIYLTFPADSR_							A0A178V724		Zinc finger CCCH domain-containing protein 46	U50	NaN	1824700
LLTARPVPNSAQLGFVGEVAR	1	Unmodified					_LLTARPVPNSAQLGFVGEVAR_							A0A178V7F4	NAGK	Acetylglutamate kinase, chloroplastic	U50	116.48	7686600
QLNIPAEFR	0	Unmodified					_QLNIPAEFR_							A0A178V7F4	NAGK	Acetylglutamate kinase, chloroplastic	U50	99.139	6175400
YGGAAMTSPELK	0	Unmodified					_YGGAAMTSPELK_							A0A178V7F4	NAGK	Acetylglutamate kinase, chloroplastic	U50	144.65	10207000
DKMIYASSKDR	2	Unmodified					_DKMIYASSKDR_							A0A178V7X3	ADF2;At3g46000	Actin-depolymerizing factor 2	U0	95.17	1569300
DKMIYASSKDR	2	Unmodified					_DKMIYASSKDR_							A0A178V7X3	ADF2;At3g46000	Actin-depolymerizing factor 2	U0	96.82	22636000
DKMIYASSKDR	2	Unmodified					_DKMIYASSKDR_							A0A178V7X3	ADF2;At3g46000	Actin-depolymerizing factor 2	U50	101.56	29820000
IEDKQVIVEK	1	Unmodified					_IEDKQVIVEK_							A0A178V7X3	ADF2;At3g46000	Actin-depolymerizing factor 2	U0	128.28	527490000
IEDKQVIVEK	1	Unmodified					_IEDKQVIVEK_							A0A178V7X3	ADF2;At3g46000	Actin-depolymerizing factor 2	U0	200.68	73912000
IEDKQVIVEK	1	Unmodified					_IEDKQVIVEK_							A0A178V7X3	ADF2;At3g46000	Actin-depolymerizing factor 2	U50	119.39	165960000
IEDKQVIVEK	1	Unmodified					_IEDKQVIVEK_							A0A178V7X3	ADF2;At3g46000	Actin-depolymerizing factor 2	U50	152.54	22604000
IEDKQVIVEKLGEPEQSYDDFAASLPADDCR	2	Unmodified					_IEDKQVIVEKLGEPEQSYDDFAASLPADDCR_							A0A178V7X3	ADF2;At3g46000	Actin-depolymerizing factor 2	U0	NaN	2173800
IEDKQVIVEKLGEPEQSYDDFAASLPADDCR	2	Unmodified					_IEDKQVIVEKLGEPEQSYDDFAASLPADDCR_							A0A178V7X3	ADF2;At3g46000	Actin-depolymerizing factor 2	U50	79.408	9246300
IFFIAWSPDTAK	0	Unmodified					_IFFIAWSPDTAK_							A0A178V7X3	ADF2;At3g46000	Actin-depolymerizing factor 2	U0	174.73	377640000
IFFIAWSPDTAK	0	Unmodified					_IFFIAWSPDTAK_							A0A178V7X3	ADF2;At3g46000	Actin-depolymerizing factor 2	U50	161.63	239170000
IFFIAWSPDTAKVR	1	Unmodified					_IFFIAWSPDTAKVR_							A0A178V7X3	ADF2;At3g46000	Actin-depolymerizing factor 2	U0	103.97	15628000
IFFIAWSPDTAKVR	1	Unmodified					_IFFIAWSPDTAKVR_							A0A178V7X3	ADF2;At3g46000	Actin-depolymerizing factor 2	U50	103.97	24849000
LGEPEQSYDDFAASLPADDCR	0	Unmodified					_LGEPEQSYDDFAASLPADDCR_							A0A178V7X3	ADF2;At3g46000	Actin-depolymerizing factor 2	U0	105.96	27038000
LGEPEQSYDDFAASLPADDCR	0	Unmodified					_LGEPEQSYDDFAASLPADDCR_							A0A178V7X3	ADF2;At3g46000	Actin-depolymerizing factor 2	U0	142.54	12895000
LGEPEQSYDDFAASLPADDCR	0	Methyl (KR)			1		_LGEPEQSYDDFAASLPADDCR(me)_		LGEPEQSYDDFAASLPADDCR(1)			LGEPEQSYDDFAASLPADDCR(72.15)		A0A178V7X3	ADF2;At3g46000	Actin-depolymerizing factor 2	U0	72.145	4308600
LGEPEQSYDDFAASLPADDCR	0	Unmodified					_LGEPEQSYDDFAASLPADDCR_							A0A178V7X3	ADF2;At3g46000	Actin-depolymerizing factor 2	U50	114.53	56972000
LGEPEQSYDDFAASLPADDCR	0	Unmodified					_LGEPEQSYDDFAASLPADDCR_							A0A178V7X3	ADF2;At3g46000	Actin-depolymerizing factor 2	U50	208.39	24916000
LGEPEQSYDDFAASLPADDCR	0	Methyl (KR)			1		_LGEPEQSYDDFAASLPADDCR(me)_		LGEPEQSYDDFAASLPADDCR(1)			LGEPEQSYDDFAASLPADDCR(41.4)		A0A178V7X3	ADF2;At3g46000	Actin-depolymerizing factor 2	U50	41.397	5949500
QVIVEKLGEPEQSYDDFAASLPADDCR	1	Unmodified					_QVIVEKLGEPEQSYDDFAASLPADDCR_							A0A178V7X3	ADF2;At3g46000	Actin-depolymerizing factor 2	U0	NaN	7303300
QVIVEKLGEPEQSYDDFAASLPADDCR	1	Unmodified					_QVIVEKLGEPEQSYDDFAASLPADDCR_							A0A178V7X3	ADF2;At3g46000	Actin-depolymerizing factor 2	U50	109.42	37069000
SKIFFIAWSPDTAK	1	Unmodified					_SKIFFIAWSPDTAK_							A0A178V7X3	ADF2;At3g46000	Actin-depolymerizing factor 2	U0	97.268	931260000
SKIFFIAWSPDTAK	1	Unmodified					_SKIFFIAWSPDTAK_							A0A178V7X3	ADF2;At3g46000	Actin-depolymerizing factor 2	U0	227.93	280820000
SKIFFIAWSPDTAKVR	2	Unmodified					_SKIFFIAWSPDTAKVR_							A0A178V7X3	ADF2;At3g46000	Actin-depolymerizing factor 2	U0	45.684	8499500
SKIFFIAWSPDTAKVR	2	Unmodified					_SKIFFIAWSPDTAKVR_							A0A178V7X3	ADF2;At3g46000	Actin-depolymerizing factor 2	U0	37.85	6380600
SKIFFIAWSPDTAKVR	2	Unmodified					_SKIFFIAWSPDTAKVR_							A0A178V7X3	ADF2;At3g46000	Actin-depolymerizing factor 2	U50	87.99	11978000
SKIFFIAWSPDTAKVR	2	Unmodified					_SKIFFIAWSPDTAKVR_							A0A178V7X3	ADF2;At3g46000	Actin-depolymerizing factor 2	U50	NaN	7928900
TFRTIVYKIEDK	2	Unmodified					_TFRTIVYKIEDK_							A0A178V7X3	ADF2;At3g46000	Actin-depolymerizing factor 2	U0	134.68	14234000
TIVYKIEDK	1	Unmodified					_TIVYKIEDK_							A0A178V7X3	ADF2;At3g46000	Actin-depolymerizing factor 2	U0	157.99	1243200000
TIVYKIEDK	1	Unmodified					_TIVYKIEDK_							A0A178V7X3	ADF2;At3g46000	Actin-depolymerizing factor 2	U50	140.11	428890000
TIVYKIEDKQVIVEK	2	Unmodified					_TIVYKIEDKQVIVEK_							A0A178V7X3	ADF2;At3g46000	Actin-depolymerizing factor 2	U0	120.3	13752000
TIVYKIEDKQVIVEK	2	Unmodified					_TIVYKIEDKQVIVEK_							A0A178V7X3	ADF2;At3g46000	Actin-depolymerizing factor 2	U0	140.22	850630000
TIVYKIEDKQVIVEK	2	Unmodified					_TIVYKIEDKQVIVEK_							A0A178V7X3	ADF2;At3g46000	Actin-depolymerizing factor 2	U0	183.06	47514000
TIVYKIEDKQVIVEK	2	Unmodified					_TIVYKIEDKQVIVEK_							A0A178V7X3	ADF2;At3g46000	Actin-depolymerizing factor 2	U0	41.482	3317200
TIVYKIEDKQVIVEK	2	Unmodified					_TIVYKIEDKQVIVEK_							A0A178V7X3	ADF2;At3g46000	Actin-depolymerizing factor 2	U0	67.605	2456100
TIVYKIEDKQVIVEK	2	Unmodified					_TIVYKIEDKQVIVEK_							A0A178V7X3	ADF2;At3g46000	Actin-depolymerizing factor 2	U0	55.755	6526100
TIVYKIEDKQVIVEK	2	Unmodified					_TIVYKIEDKQVIVEK_							A0A178V7X3	ADF2;At3g46000	Actin-depolymerizing factor 2	U0	82.837	6508800
TIVYKIEDKQVIVEK	2	Unmodified					_TIVYKIEDKQVIVEK_							A0A178V7X3	ADF2;At3g46000	Actin-depolymerizing factor 2	U0	51.591
TIVYKIEDKQVIVEK	2	Unmodified					_TIVYKIEDKQVIVEK_							A0A178V7X3	ADF2;At3g46000	Actin-depolymerizing factor 2	U0	66.335
TIVYKIEDKQVIVEK	2	Unmodified					_TIVYKIEDKQVIVEK_							A0A178V7X3	ADF2;At3g46000	Actin-depolymerizing factor 2	U0	57.148	6747600
TIVYKIEDKQVIVEK	2	Unmodified					_TIVYKIEDKQVIVEK_							A0A178V7X3	ADF2;At3g46000	Actin-depolymerizing factor 2	U50	129.05	464490000
TIVYKIEDKQVIVEK	2	Unmodified					_TIVYKIEDKQVIVEK_							A0A178V7X3	ADF2;At3g46000	Actin-depolymerizing factor 2	U50	132.08	513280000
TIVYKIEDKQVIVEK	2	Unmodified					_TIVYKIEDKQVIVEK_							A0A178V7X3	ADF2;At3g46000	Actin-depolymerizing factor 2	U50	197.19	26131000
TIVYKIEDKQVIVEK	2	Unmodified					_TIVYKIEDKQVIVEK_							A0A178V7X3	ADF2;At3g46000	Actin-depolymerizing factor 2	U50	NaN	2666700
VRDKMIYASSK	2	Unmodified					_VRDKMIYASSK_							A0A178V7X3	ADF2;At3g46000	Actin-depolymerizing factor 2	U0	77.124	2800300
VRDKMIYASSK	2	Unmodified					_VRDKMIYASSK_							A0A178V7X3	ADF2;At3g46000	Actin-depolymerizing factor 2	U50	NaN	676230
YCIYDFDFVTAENCQK	0	Unmodified					_YCIYDFDFVTAENCQK_							A0A178V7X3	ADF2;At3g46000	Actin-depolymerizing factor 2	U0	178.71	23170000
YCIYDFDFVTAENCQK	0	Unmodified					_YCIYDFDFVTAENCQK_							A0A178V7X3	ADF2;At3g46000	Actin-depolymerizing factor 2	U0	NaN	8127500
YCIYDFDFVTAENCQK	0	Unmodified					_YCIYDFDFVTAENCQK_							A0A178V7X3	ADF2;At3g46000	Actin-depolymerizing factor 2	U50	259.55	85962000
YCIYDFDFVTAENCQK	0	Unmodified					_YCIYDFDFVTAENCQK_							A0A178V7X3	ADF2;At3g46000	Actin-depolymerizing factor 2	U50	141.65	34009000
YCIYDFDFVTAENCQKSK	1	Unmodified					_YCIYDFDFVTAENCQKSK_							A0A178V7X3	ADF2;At3g46000	Actin-depolymerizing factor 2	U0	NaN	1767400
YCIYDFDFVTAENCQKSK	1	Unmodified					_YCIYDFDFVTAENCQKSK_							A0A178V7X3	ADF2;At3g46000	Actin-depolymerizing factor 2	U50	34.274	13051000
AEADPKVETVTETK	1	Unmodified					_AEADPKVETVTETK_							A0A178V898	CCH	Copper transport protein CCH	U50	111.88	46483000
AEADPKVETVTETK	1	Unmodified					_AEADPKVETVTETK_							A0A178V898	CCH	Copper transport protein CCH	U50	225.33	4259000
AEADPKVETVTETKTEAETK	2	Unmodified					_AEADPKVETVTETKTEAETK_							A0A178V898	CCH	Copper transport protein CCH	U0	NaN	3816400
AEADPKVETVTETKTEAETK	2	Unmodified					_AEADPKVETVTETKTEAETK_							A0A178V898	CCH	Copper transport protein CCH	U50	181.14	59466000
AEADPKVETVTETKTEAETK	2	Unmodified					_AEADPKVETVTETKTEAETK_							A0A178V898	CCH	Copper transport protein CCH	U50	270.49	21539000
AQTVVLK	0	Acetyl (Protein N-term)	1				_(ac)AQTVVLK_							A0A178V898	CCH	Copper transport protein CCH	U0	64.803	5036400
AQTVVLK	0	Acetyl (Protein N-term)	1				_(ac)AQTVVLK_							A0A178V898	CCH	Copper transport protein CCH	U50	81.297	56952000
GNVEPEAVFQTVSK	0	Unmodified					_GNVEPEAVFQTVSK_							A0A178V898	CCH	Copper transport protein CCH	U0	83.314	16348000
GNVEPEAVFQTVSK	0	Unmodified					_GNVEPEAVFQTVSK_							A0A178V898	CCH	Copper transport protein CCH	U0	NaN	3912400
GNVEPEAVFQTVSK	0	Unmodified					_GNVEPEAVFQTVSK_							A0A178V898	CCH	Copper transport protein CCH	U50	107.71	208820000
GNVEPEAVFQTVSK	0	Unmodified					_GNVEPEAVFQTVSK_							A0A178V898	CCH	Copper transport protein CCH	U50	110.14	44515000
GNVEPEAVFQTVSKTGKK	2	Unmodified					_GNVEPEAVFQTVSKTGKK_							A0A178V898	CCH	Copper transport protein CCH	U50	52.866	12704000
GNVEPEAVFQTVSKTGKK	2	Unmodified					_GNVEPEAVFQTVSKTGKK_							A0A178V898	CCH	Copper transport protein CCH	U50	100.77	8858800
KTSYWPVEAEAEPK	1	Unmodified					_KTSYWPVEAEAEPK_							A0A178V898	CCH	Copper transport protein CCH	U0	NaN	2561000
KTSYWPVEAEAEPK	1	Unmodified					_KTSYWPVEAEAEPK_							A0A178V898	CCH	Copper transport protein CCH	U50	83.856	32347000
KTSYWPVEAEAEPK	1	Unmodified					_KTSYWPVEAEAEPK_							A0A178V898	CCH	Copper transport protein CCH	U50	157.09	9352700
MEGVESFDIDIKEQK	1	Oxidation (M)				1	_M(ox)EGVESFDIDIKEQK_			M(1)EGVESFDIDIKEQK			M(103.32)EGVESFDIDIKEQK	A0A178V898	CCH	Copper transport protein CCH	U50	103.32	6522100
MEGVESFDIDIKEQK	1	Unmodified					_MEGVESFDIDIKEQK_							A0A178V898	CCH	Copper transport protein CCH	U50	73.435
TGKKTSYWPVEAEAEPK	2	Unmodified					_TGKKTSYWPVEAEAEPK_							A0A178V898	CCH	Copper transport protein CCH	U50	39.863	6750400
TSYWPVEAEAEPK	0	Unmodified					_TSYWPVEAEAEPK_							A0A178V898	CCH	Copper transport protein CCH	U0	63.046	8862800
TSYWPVEAEAEPK	0	Unmodified					_TSYWPVEAEAEPK_							A0A178V898	CCH	Copper transport protein CCH	U50	89.403	100410000
TSYWPVEAEAEPKAEADPK	1	Unmodified					_TSYWPVEAEAEPKAEADPK_							A0A178V898	CCH	Copper transport protein CCH	U50	67.866	12424000
VETVTETKTEAETKTEAK	2	Unmodified					_VETVTETKTEAETKTEAK_							A0A178V898	CCH	Copper transport protein CCH	U0	NaN	2713800
VETVTETKTEAETKTEAK	2	Unmodified					_VETVTETKTEAETKTEAK_							A0A178V898	CCH	Copper transport protein CCH	U50	185.63	34478000
VETVTETKTEAETKTEAK	2	Unmodified					_VETVTETKTEAETKTEAK_							A0A178V898	CCH	Copper transport protein CCH	U50	215.15	13891000
VGMSCQGCVGAVNR	0	Oxidation (M)				1	_VGM(ox)SCQGCVGAVNR_			VGM(1)SCQGCVGAVNR			VGM(77.53)SCQGCVGAVNR	A0A178V898	CCH	Copper transport protein CCH	U0	77.533	1128700
VGMSCQGCVGAVNR	0	Unmodified					_VGMSCQGCVGAVNR_							A0A178V898	CCH	Copper transport protein CCH	U0	98.04	4670400
VGMSCQGCVGAVNR	0	Oxidation (M)				1	_VGM(ox)SCQGCVGAVNR_			VGM(1)SCQGCVGAVNR			VGM(219.72)SCQGCVGAVNR	A0A178V898	CCH	Copper transport protein CCH	U50	219.72	14273000
VGMSCQGCVGAVNR	0	Oxidation (M)				1	_VGM(ox)SCQGCVGAVNR_			VGM(1)SCQGCVGAVNR			VGM(99.84)SCQGCVGAVNR	A0A178V898	CCH	Copper transport protein CCH	U50	99.844	3567000
VGMSCQGCVGAVNR	0	Unmodified					_VGMSCQGCVGAVNR_							A0A178V898	CCH	Copper transport protein CCH	U50	198.02	64011000
VGMSCQGCVGAVNR	0	Unmodified					_VGMSCQGCVGAVNR_							A0A178V898	CCH	Copper transport protein CCH	U50	90.861	11194000
VGMSCQGCVGAVNRVLGK	1	Oxidation (M)				1	_VGM(ox)SCQGCVGAVNRVLGK_			VGM(1)SCQGCVGAVNRVLGK			VGM(41.39)SCQGCVGAVNRVLGK	A0A178V898	CCH	Copper transport protein CCH	U50	41.386	12625000
VTVKGNVEPEAVFQTVSK	1	Unmodified					_VTVKGNVEPEAVFQTVSK_							A0A178V898	CCH	Copper transport protein CCH	U0	NaN	6665400
VTVKGNVEPEAVFQTVSK	1	Unmodified					_VTVKGNVEPEAVFQTVSK_							A0A178V898	CCH	Copper transport protein CCH	U50	99.273	74303000
AATTENLPQLK	0	Acetyl (Protein N-term)	1				_(ac)AATTENLPQLK_							A0A178V8F3		Probable UTP--glucose-1-phosphate uridylyltransferase 2	U0	153.08	10578000
AATTENLPQLK	0	Acetyl (Protein N-term)	1				_(ac)AATTENLPQLK_							A0A178V8F3		Probable UTP--glucose-1-phosphate uridylyltransferase 2	U50	176.6	10672000
IQTPTDEIVVPYEK	0	Unmodified					_IQTPTDEIVVPYEK_							A0A178V8F3		Probable UTP--glucose-1-phosphate uridylyltransferase 2	U0	108.35	7531800
MTPVSQDVAETK	0	Unmodified					_MTPVSQDVAETK_							A0A178V8F3		Probable UTP--glucose-1-phosphate uridylyltransferase 2	U0	126.39	4623600
MTPVSQDVAETK	0	Unmodified					_MTPVSQDVAETK_							A0A178V8F3		Probable UTP--glucose-1-phosphate uridylyltransferase 2	U50	126.39	5093800
TNPSNPSIELGPEFK	0	Unmodified					_TNPSNPSIELGPEFK_							A0A178V8F3		Probable UTP--glucose-1-phosphate uridylyltransferase 2	U0	122.18	9027300
TNPSNPSIELGPEFK	0	Unmodified					_TNPSNPSIELGPEFK_							A0A178V8F3		Probable UTP--glucose-1-phosphate uridylyltransferase 2	U50	77.185	3429800
TNPSNPSIELGPEFKK	1	Unmodified					_TNPSNPSIELGPEFKK_							A0A178V8F3		Probable UTP--glucose-1-phosphate uridylyltransferase 2	U0	50.966	39491000
TNPSNPSIELGPEFKK	1	Unmodified					_TNPSNPSIELGPEFKK_							A0A178V8F3		Probable UTP--glucose-1-phosphate uridylyltransferase 2	U50	53.255	15561000
VLEEIKRNTFELACR	2	Unmodified					_VLEEIKRNTFELACR_							A0A178V8J2	IPT3	Adenylate isopentenyltransferase 3, chloroplastic	U0	48.704	132440000
VLEEIKRNTFELACR	2	Unmodified					_VLEEIKRNTFELACR_							A0A178V8J2	IPT3	Adenylate isopentenyltransferase 3, chloroplastic	U0	50.088	32798000
VLEEIKRNTFELACR	2	Unmodified					_VLEEIKRNTFELACR_							A0A178V8J2	IPT3	Adenylate isopentenyltransferase 3, chloroplastic	U50	NaN	8797500
FTSDIWHPNVYPDGR	0	Unmodified					_FTSDIWHPNVYPDGR_							A0A178V960	UBC13	Ubiquitin-conjugating enzyme E2 13	U0	97.836	128610000
FTSDIWHPNVYPDGR	0	Unmodified					_FTSDIWHPNVYPDGR_							A0A178V960	UBC13	Ubiquitin-conjugating enzyme E2 13	U0	206.58	12425000
MNSQACLLLQK	0	Acetyl (Protein N-term),Oxidation (M)	1			1	_(ac)M(ox)NSQACLLLQK_			M(1)NSQACLLLQK			M(183.27)NSQACLLLQK	A0A178V960	UBC13	Ubiquitin-conjugating enzyme E2 13	U0	183.27	19645000
MNSQACLLLQK	0	Acetyl (Protein N-term)	1				_(ac)MNSQACLLLQK_							A0A178V960	UBC13	Ubiquitin-conjugating enzyme E2 13	U0	165.15	37508000
DLCKHPVDGFSAGLVDEK	1	Unmodified					_DLCKHPVDGFSAGLVDEK_							A0A178V960	UBC13;UBC7	Ubiquitin-conjugating enzyme E2 13;Ubiquitin-conjugating enzyme E2 7	U0	58.693	3019100
VCISILHPPGDDPSGYELASER	0	Unmodified					_VCISILHPPGDDPSGYELASER_							A0A178V960	UBC13;UBC7	Ubiquitin-conjugating enzyme E2 13;Ubiquitin-conjugating enzyme E2 7	U0	168.83	66866000
YTISEGDGHKEWVSCVR	1	Unmodified					_YTISEGDGHKEWVSCVR_							A0A178V9J1	RACK1C	Receptor for activated C kinase 1C	U0	49.537	7926400
FNAGSNKAASSGTSLNTK	1	Unmodified					_FNAGSNKAASSGTSLNTK_							A0A178V9J8	MBF1B	Multiprotein-bridging factor 1b	U0	98.077	7146900
KFNAGSNKAASSGTSLNTK	2	Unmodified					_KFNAGSNKAASSGTSLNTK_							A0A178V9J8	MBF1B	Multiprotein-bridging factor 1b	U0	87.228	3710100
KFNAGSNKAASSGTSLNTK	2	Unmodified					_KFNAGSNKAASSGTSLNTK_							A0A178V9J8	MBF1B	Multiprotein-bridging factor 1b	U0	79.88	3614300
KFNAGSNKAASSGTSLNTK	2	Unmodified					_KFNAGSNKAASSGTSLNTK_							A0A178V9J8	MBF1B	Multiprotein-bridging factor 1b	U50	NaN	350140
KFNAGSNKAASSGTSLNTK	2	Unmodified					_KFNAGSNKAASSGTSLNTK_							A0A178V9J8	MBF1B	Multiprotein-bridging factor 1b	U50	NaN	648390
AGLEEPLEQIHK	0	Unmodified					_AGLEEPLEQIHK_							A0A178V9U8	RPS20A;At5g62300	40S ribosomal protein S20-1	U0	152.04	111080000
AGLEEPLEQIHK	0	Unmodified					_AGLEEPLEQIHK_							A0A178V9U8	RPS20A;At5g62300	40S ribosomal protein S20-1	U0	NaN	697060000
AGLEEPLEQIHK	0	Unmodified					_AGLEEPLEQIHK_							A0A178V9U8	RPS20A;At5g62300	40S ribosomal protein S20-1	U50	97.749	64128000
AGLEEPLEQIHK	0	Unmodified					_AGLEEPLEQIHK_							A0A178V9U8	RPS20A;At5g62300	40S ribosomal protein S20-1	U50	NaN	11130000
AGLEEPLEQIHKIR	1	Unmodified					_AGLEEPLEQIHKIR_							A0A178V9U8	RPS20A;At5g62300	40S ribosomal protein S20-1	U0	120.14	322130000
AGLEEPLEQIHKIR	1	Unmodified					_AGLEEPLEQIHKIR_							A0A178V9U8	RPS20A;At5g62300	40S ribosomal protein S20-1	U0	148.96	186870000
AGLEEPLEQIHKIR	1	Unmodified					_AGLEEPLEQIHKIR_							A0A178V9U8	RPS20A;At5g62300	40S ribosomal protein S20-1	U0	222.34	10158000
AGLEEPLEQIHKIR	1	Unmodified					_AGLEEPLEQIHKIR_							A0A178V9U8	RPS20A;At5g62300	40S ribosomal protein S20-1	U50	97.957	33224000
AGLEEPLEQIHKIR	1	Unmodified					_AGLEEPLEQIHKIR_							A0A178V9U8	RPS20A;At5g62300	40S ribosomal protein S20-1	U50	125.82	21443000
ATAYQPMKPGK	1	Acetyl (Protein N-term),Oxidation (M)	1			1	_(ac)ATAYQPM(ox)KPGK_			ATAYQPM(1)KPGK			ATAYQPM(103.7)KPGK	A0A178V9U8	RPS20A	40S ribosomal protein S20-1	U0	103.7	179510000
ATAYQPMKPGK	1	Acetyl (Protein N-term),Oxidation (M)	1			1	_(ac)ATAYQPM(ox)KPGK_			ATAYQPM(1)KPGK			ATAYQPM(57.6)KPGK	A0A178V9U8	RPS20A	40S ribosomal protein S20-1	U0	57.598	5304400
ATAYQPMKPGK	1	Acetyl (Protein N-term)	1				_(ac)ATAYQPMKPGK_							A0A178V9U8	RPS20A	40S ribosomal protein S20-1	U0	102.07	383680000
ATAYQPMKPGK	1	Acetyl (Protein N-term),Oxidation (M)	1			1	_(ac)ATAYQPM(ox)KPGK_			ATAYQPM(1)KPGK			ATAYQPM(110.87)KPGK	A0A178V9U8	RPS20A	40S ribosomal protein S20-1	U50	110.87	18139000
ATAYQPMKPGK	1	Acetyl (Protein N-term)	1				_(ac)ATAYQPMKPGK_							A0A178V9U8	RPS20A	40S ribosomal protein S20-1	U50	88.819	40090000
APCGEGTNTWDRFELR	1	Unmodified					_APCGEGTNTWDRFELR_							A0A178V9U8	RPS20A;At5g62300;RPS20B	40S ribosomal protein S20-1;40S ribosomal protein S20-2	U0	144.68	33052000
APCGEGTNTWDRFELR	1	Unmodified					_APCGEGTNTWDRFELR_							A0A178V9U8	RPS20A;At5g62300;RPS20B	40S ribosomal protein S20-1;40S ribosomal protein S20-2	U50	NaN	5186300
GPVRMPTKVLK	2	Oxidation (M)				1	_GPVRM(ox)PTKVLK_			GPVRM(1)PTKVLK			GPVRM(84.82)PTKVLK	A0A178V9U8	RPS20A;At5g62300;RPS20B	40S ribosomal protein S20-1;40S ribosomal protein S20-2	U0	84.821	3895700
GPVRMPTKVLK	2	Unmodified					_GPVRMPTKVLK_							A0A178V9U8	RPS20A;At5g62300;RPS20B	40S ribosomal protein S20-1;40S ribosomal protein S20-2	U0	113.61	10219000
GPVRMPTKVLK	2	Oxidation (M)				1	_GPVRM(ox)PTKVLK_							A0A178V9U8	RPS20A;At5g62300;RPS20B	40S ribosomal protein S20-1;40S ribosomal protein S20-2	U50	NaN	751250
GPVRMPTKVLK	2	Unmodified					_GPVRMPTKVLK_							A0A178V9U8	RPS20A;At5g62300;RPS20B	40S ribosomal protein S20-1;40S ribosomal protein S20-2	U50	39.561	1905800
IRITLSSK	1	Unmodified					_IRITLSSK_							A0A178V9U8	RPS20A;At5g62300;RPS20B	40S ribosomal protein S20-1;40S ribosomal protein S20-2	U0	172.94	23432000
ITLSSKNVKNLEK	2	Unmodified					_ITLSSKNVKNLEK_							A0A178V9U8	RPS20A;At5g62300;RPS20B	40S ribosomal protein S20-1;40S ribosomal protein S20-2	U0	119.88	5251400
ITLSSKNVKNLEK	2	Unmodified					_ITLSSKNVKNLEK_							A0A178V9U8	RPS20A;At5g62300;RPS20B	40S ribosomal protein S20-1;40S ribosomal protein S20-2	U50	NaN	930630
KAPCGEGTNTWDR	1	Unmodified					_KAPCGEGTNTWDR_							A0A178V9U8	RPS20A;At5g62300;RPS20B	40S ribosomal protein S20-1;40S ribosomal protein S20-2	U0	59.796	2003200
KAPCGEGTNTWDR	1	Methyl (KR)			1		_K(me)APCGEGTNTWDR_		K(1)APCGEGTNTWDR			K(81.87)APCGEGTNTWDR(-81.87)		A0A178V9U8	RPS20A;At5g62300;RPS20B	40S ribosomal protein S20-1;40S ribosomal protein S20-2	U0	81.904	3381000
KAPCGEGTNTWDRFELR	2	Unmodified					_KAPCGEGTNTWDRFELR_							A0A178V9U8	RPS20A;At5g62300;RPS20B	40S ribosomal protein S20-1;40S ribosomal protein S20-2	U0	171.56	140320000
KAPCGEGTNTWDRFELR	2	Methyl (KR)			1		_K(me)APCGEGTNTWDRFELR_		K(1)APCGEGTNTWDRFELR			K(34.7)APCGEGTNTWDR(-34.7)FELR(-63.1)		A0A178V9U8	RPS20A;At5g62300;RPS20B	40S ribosomal protein S20-1;40S ribosomal protein S20-2	U0	83.751	103900000
KAPCGEGTNTWDRFELR	2	Unmodified					_KAPCGEGTNTWDRFELR_							A0A178V9U8	RPS20A;At5g62300;RPS20B	40S ribosomal protein S20-1;40S ribosomal protein S20-2	U50	126.07	14604000
KAPCGEGTNTWDRFELR	2	Methyl (KR)			1		_K(me)APCGEGTNTWDRFELR_							A0A178V9U8	RPS20A;At5g62300;RPS20B	40S ribosomal protein S20-1;40S ribosomal protein S20-2	U50	NaN	3685300
NLEKVCTDLVR	1	Unmodified					_NLEKVCTDLVR_							A0A178V9U8	RPS20A;At5g62300;RPS20B	40S ribosomal protein S20-1;40S ribosomal protein S20-2	U0	122.69	289460000
NLEKVCTDLVR	1	Unmodified					_NLEKVCTDLVR_							A0A178V9U8	RPS20A;At5g62300;RPS20B	40S ribosomal protein S20-1;40S ribosomal protein S20-2	U0	217.02	68242000
NLEKVCTDLVR	1	Unmodified					_NLEKVCTDLVR_							A0A178V9U8	RPS20A;At5g62300;RPS20B	40S ribosomal protein S20-1;40S ribosomal protein S20-2	U50	92.943	24935000
NLEKVCTDLVR	1	Unmodified					_NLEKVCTDLVR_							A0A178V9U8	RPS20A;At5g62300;RPS20B	40S ribosomal protein S20-1;40S ribosomal protein S20-2	U50	144.28	5914400
NVKNLEKVCTDLVR	2	Unmodified					_NVKNLEKVCTDLVR_							A0A178V9U8	RPS20A;At5g62300;RPS20B	40S ribosomal protein S20-1;40S ribosomal protein S20-2	U0	136.33	26527000
NVKNLEKVCTDLVR	2	Unmodified					_NVKNLEKVCTDLVR_							A0A178V9U8	RPS20A;At5g62300;RPS20B	40S ribosomal protein S20-1;40S ribosomal protein S20-2	U50	NaN	3219600
RVIDLFSSPDVVK	1	Unmodified					_RVIDLFSSPDVVK_							A0A178V9U8	RPS20A;At5g62300;RPS20B	40S ribosomal protein S20-1;40S ribosomal protein S20-2	U0	102.9	27320000
RVIDLFSSPDVVK	1	Unmodified					_RVIDLFSSPDVVK_							A0A178V9U8	RPS20A;At5g62300;RPS20B	40S ribosomal protein S20-1;40S ribosomal protein S20-2	U50	34.432	2204900
VCTDLVR	0	Unmodified					_VCTDLVR_							A0A178V9U8	RPS20A;At5g62300;RPS20B	40S ribosomal protein S20-1;40S ribosomal protein S20-2	U0	148.28	302690000
VCTDLVR	0	Unmodified					_VCTDLVR_							A0A178V9U8	RPS20A;At5g62300;RPS20B	40S ribosomal protein S20-1;40S ribosomal protein S20-2	U50	112.66	33606000
VIDLFSSPDVVK	0	Unmodified					_VIDLFSSPDVVK_							A0A178V9U8	RPS20A;At5g62300;RPS20B	40S ribosomal protein S20-1;40S ribosomal protein S20-2	U0	137.98	1623600000
VIDLFSSPDVVK	0	Unmodified					_VIDLFSSPDVVK_							A0A178V9U8	RPS20A;At5g62300;RPS20B	40S ribosomal protein S20-1;40S ribosomal protein S20-2	U0	72.34	21065000
VIDLFSSPDVVK	0	Unmodified					_VIDLFSSPDVVK_							A0A178V9U8	RPS20A;At5g62300;RPS20B	40S ribosomal protein S20-1;40S ribosomal protein S20-2	U50	130.98	170910000
VKGPVRMPTK	2	Unmodified					_VKGPVRMPTK_							A0A178V9U8	RPS20A;At5g62300;RPS20B	40S ribosomal protein S20-1;40S ribosomal protein S20-2	U0	154.85	3177900
RGDIVGVIGFPGK	1	Unmodified					_RGDIVGVIGFPGK_							A0A178VAG3		Lysine--tRNA ligase	U50	73.927	5517700
AGEKGEASTEAEPMDASSNAQE	1	Oxidation (M)				1	_AGEKGEASTEAEPM(ox)DASSNAQE_			AGEKGEASTEAEPM(1)DASSNAQE			AGEKGEASTEAEPM(74.05)DASSNAQE	A0A178VB22	EBP1	ERBB-3 BINDING PROTEIN 1	U50	74.048	7972200
AGEKGEASTEAEPMDASSNAQE	1	Unmodified					_AGEKGEASTEAEPMDASSNAQE_							A0A178VB22	EBP1	ERBB-3 BINDING PROTEIN 1	U50	71.853	33092000
AGEKGEASTEAEPMDASSNAQE	1	Unmodified					_AGEKGEASTEAEPMDASSNAQE_							A0A178VB22	EBP1	ERBB-3 BINDING PROTEIN 1	U50	118.7	15711000
ALQVVLAECKPK	1	Unmodified					_ALQVVLAECKPK_							A0A178VB22	EBP1	ERBB-3 BINDING PROTEIN 1	U0	NaN	5481700
ALQVVLAECKPK	1	Unmodified					_ALQVVLAECKPK_							A0A178VB22	EBP1	ERBB-3 BINDING PROTEIN 1	U50	72.29	21370000
FIISEIKQNFPR	1	Unmodified					_FIISEIKQNFPR_							A0A178VB22	EBP1	ERBB-3 BINDING PROTEIN 1	U0	124.67	10784000
FIISEIKQNFPR	1	Unmodified					_FIISEIKQNFPR_							A0A178VB22	EBP1	ERBB-3 BINDING PROTEIN 1	U0	NaN	1916500
FIISEIKQNFPR	1	Unmodified					_FIISEIKQNFPR_							A0A178VB22	EBP1	ERBB-3 BINDING PROTEIN 1	U50	143.24	23012000
FIISEIKQNFPR	1	Unmodified					_FIISEIKQNFPR_							A0A178VB22	EBP1	ERBB-3 BINDING PROTEIN 1	U50	207.29	4455000
FTVLLMPNGSDR	0	Oxidation (M)				1	_FTVLLM(ox)PNGSDR_			FTVLLM(1)PNGSDR			FTVLLM(75.65)PNGSDR	A0A178VB22	EBP1	ERBB-3 BINDING PROTEIN 1	U50	75.652	3353400
FTVLLMPNGSDR	0	Unmodified					_FTVLLMPNGSDR_							A0A178VB22	EBP1	ERBB-3 BINDING PROTEIN 1	U50	219.7	16650000
ITSHTLQELPK	0	Unmodified					_ITSHTLQELPK_							A0A178VB22	EBP1	ERBB-3 BINDING PROTEIN 1	U0	NaN	2910400
ITSHTLQELPK	0	Unmodified					_ITSHTLQELPK_							A0A178VB22	EBP1	ERBB-3 BINDING PROTEIN 1	U0	NaN	11952000
ITSHTLQELPK	0	Unmodified					_ITSHTLQELPK_							A0A178VB22	EBP1	ERBB-3 BINDING PROTEIN 1	U50	134.73	92994000
ITSHTLQELPK	0	Unmodified					_ITSHTLQELPK_							A0A178VB22	EBP1	ERBB-3 BINDING PROTEIN 1	U50	132.25	15659000
ITSHTLQELPKK	1	Unmodified					_ITSHTLQELPKK_							A0A178VB22	EBP1	ERBB-3 BINDING PROTEIN 1	U50	196.27	37517000
KDESVNYQLK	1	Unmodified					_KDESVNYQLK_							A0A178VB22	EBP1	ERBB-3 BINDING PROTEIN 1	U0	NaN	944460
KDESVNYQLK	1	Unmodified					_KDESVNYQLK_							A0A178VB22	EBP1	ERBB-3 BINDING PROTEIN 1	U50	28.177	1526500
NTDVTEAIQK	0	Unmodified					_NTDVTEAIQK_							A0A178VB22	EBP1	ERBB-3 BINDING PROTEIN 1	U50	118.5	2989600
QTTIYKKDESVNYQLK	2	Unmodified					_QTTIYKKDESVNYQLK_							A0A178VB22	EBP1	ERBB-3 BINDING PROTEIN 1	U50	35.1	8457600
SSDDERDEKELSLTSPEVVTK	2	Acetyl (Protein N-term)	1				_(ac)SSDDERDEKELSLTSPEVVTK_							A0A178VB22	EBP1	ERBB-3 BINDING PROTEIN 1	U0	NaN	5119500
SSDDERDEKELSLTSPEVVTK	2	Acetyl (Protein N-term)	1				_(ac)SSDDERDEKELSLTSPEVVTK_							A0A178VB22	EBP1	ERBB-3 BINDING PROTEIN 1	U50	119.79	18633000
AFASGSPIIGETR	0	Unmodified					_AFASGSPIIGETR_							A0A178VBB5	POP2	Gamma-aminobutyrate transaminase POP2, mitochondrial	U0	177.78	19145000
AFASGSPIIGETR	0	Unmodified					_AFASGSPIIGETR_							A0A178VBB5	POP2	Gamma-aminobutyrate transaminase POP2, mitochondrial	U50	187.97	26696000
AFFTSGGSDANDTQVK	0	Unmodified					_AFFTSGGSDANDTQVK_							A0A178VBB5	POP2	Gamma-aminobutyrate transaminase POP2, mitochondrial	U0	215.08	34896000
AFFTSGGSDANDTQVK	0	Unmodified					_AFFTSGGSDANDTQVK_							A0A178VBB5	POP2	Gamma-aminobutyrate transaminase POP2, mitochondrial	U0	NaN	2227000
AFFTSGGSDANDTQVK	0	Unmodified					_AFFTSGGSDANDTQVK_							A0A178VBB5	POP2	Gamma-aminobutyrate transaminase POP2, mitochondrial	U50	62.861	10325000
AFFTSGGSDANDTQVK	0	Unmodified					_AFFTSGGSDANDTQVK_							A0A178VBB5	POP2	Gamma-aminobutyrate transaminase POP2, mitochondrial	U50	NaN	167490000
FHLPGETEEEFSTR	0	Unmodified					_FHLPGETEEEFSTR_							A0A178VBB5	POP2	Gamma-aminobutyrate transaminase POP2, mitochondrial	U50	96.866	14286000
FQDGVKAFASGSPIIGETR	1	Unmodified					_FQDGVKAFASGSPIIGETR_							A0A178VBB5	POP2	Gamma-aminobutyrate transaminase POP2, mitochondrial	U50	92.098	5831300
LVWYYNNALGRPEK	1	Unmodified					_LVWYYNNALGRPEK_							A0A178VBB5	POP2	Gamma-aminobutyrate transaminase POP2, mitochondrial	U0	74.678	20095000
LVWYYNNALGRPEK	1	Unmodified					_LVWYYNNALGRPEK_							A0A178VBB5	POP2	Gamma-aminobutyrate transaminase POP2, mitochondrial	U0	NaN	2408000
LVWYYNNALGRPEK	1	Unmodified					_LVWYYNNALGRPEK_							A0A178VBB5	POP2	Gamma-aminobutyrate transaminase POP2, mitochondrial	U50	222.8	11368000
LVWYYNNALGRPEK	1	Unmodified					_LVWYYNNALGRPEK_							A0A178VBB5	POP2	Gamma-aminobutyrate transaminase POP2, mitochondrial	U50	NaN	85528000
LVWYYNNALGRPEKK	2	Unmodified					_LVWYYNNALGRPEKK_							A0A178VBB5	POP2	Gamma-aminobutyrate transaminase POP2, mitochondrial	U0	51.939	4080500
LVWYYNNALGRPEKK	2	Unmodified					_LVWYYNNALGRPEKK_							A0A178VBB5	POP2	Gamma-aminobutyrate transaminase POP2, mitochondrial	U0	NaN	2051200
LVWYYNNALGRPEKK	2	Unmodified					_LVWYYNNALGRPEKK_							A0A178VBB5	POP2	Gamma-aminobutyrate transaminase POP2, mitochondrial	U50	77.192	22385000
LVWYYNNALGRPEKK	2	Unmodified					_LVWYYNNALGRPEKK_							A0A178VBB5	POP2	Gamma-aminobutyrate transaminase POP2, mitochondrial	U50	109.83	12751000
SEGSYVYDDTGKK	1	Unmodified					_SEGSYVYDDTGKK_							A0A178VBB5	POP2	Gamma-aminobutyrate transaminase POP2, mitochondrial	U0	68.171	3379300
SEGSYVYDDTGKK	1	Unmodified					_SEGSYVYDDTGKK_							A0A178VBB5	POP2	Gamma-aminobutyrate transaminase POP2, mitochondrial	U50	116.51	16484000
VLLEMFTANK	0	Oxidation (M)				1	_VLLEM(ox)FTANK_			VLLEM(1)FTANK			VLLEM(106.93)FTANK	A0A178VBB5	POP2	Gamma-aminobutyrate transaminase POP2, mitochondrial	U0	106.93	5979200
VLLEMFTANK	0	Oxidation (M)				1	_VLLEM(ox)FTANK_			VLLEM(1)FTANK			VLLEM(96.31)FTANK	A0A178VBB5	POP2	Gamma-aminobutyrate transaminase POP2, mitochondrial	U0	96.311	6768400
VLLEMFTANK	0	Unmodified					_VLLEMFTANK_							A0A178VBB5	POP2	Gamma-aminobutyrate transaminase POP2, mitochondrial	U0	106.93	66893000
VLLEMFTANK	0	Oxidation (M)				1	_VLLEM(ox)FTANK_			VLLEM(1)FTANK			VLLEM(93.17)FTANK	A0A178VBB5	POP2	Gamma-aminobutyrate transaminase POP2, mitochondrial	U50	93.166	29611000
VLLEMFTANK	0	Oxidation (M)				1	_VLLEM(ox)FTANK_			VLLEM(1)FTANK			VLLEM(103.87)FTANK	A0A178VBB5	POP2	Gamma-aminobutyrate transaminase POP2, mitochondrial	U50	103.87
VLLEMFTANK	0	Unmodified					_VLLEMFTANK_							A0A178VBB5	POP2	Gamma-aminobutyrate transaminase POP2, mitochondrial	U50	151.5	266930000
VLLEMFTANKMAK	1	Unmodified					_VLLEMFTANKMAK_							A0A178VBB5	POP2	Gamma-aminobutyrate transaminase POP2, mitochondrial	U50	85.973	7482200
GGLVDIDAAAR	0	Unmodified					_GGLVDIDAAAR_							A0A178VBD5	NSN1	Guanine nucleotide-binding protein-like NSN1	U50	129.38	20198000
SSGNDASIALR	0	Unmodified					_SSGNDASIALR_							A0A178VBD5	NSN1	Guanine nucleotide-binding protein-like NSN1	U50	222.42	6467000
RLSGATVTIQETR	1	Unmodified					_RLSGATVTIQETR_							A0A178VBE4	FLK	Flowering locus K homology domain	U0	NaN	1139100
RLSGATVTIQETR	1	Unmodified					_RLSGATVTIQETR_							A0A178VBE4	FLK	Flowering locus K homology domain	U50	102.52	10939000
LVSLPEIR	0	Unmodified					_LVSLPEIR_							A0A178VBQ7	RPL9	50S ribosomal protein L9, chloroplastic	U0	105.04	2860700
LVSLPEIR	0	Unmodified					_LVSLPEIR_							A0A178VBQ7	RPL9	50S ribosomal protein L9, chloroplastic	U50	107.67	6416200
AGLEAPLEQIHK	0	Unmodified					_AGLEAPLEQIHK_							A0A178VBU3	RPS20B	40S ribosomal protein S20-2	U0	130.53	42208000
AGLEAPLEQIHK	0	Unmodified					_AGLEAPLEQIHK_							A0A178VBU3	RPS20B	40S ribosomal protein S20-2	U0	101.71	284920000
AGLEAPLEQIHK	0	Unmodified					_AGLEAPLEQIHK_							A0A178VBU3	RPS20B	40S ribosomal protein S20-2	U50	92.239	3094600
AGLEAPLEQIHK	0	Unmodified					_AGLEAPLEQIHK_							A0A178VBU3	RPS20B	40S ribosomal protein S20-2	U50	NaN	22195000
AGLEAPLEQIHKIR	1	Unmodified					_AGLEAPLEQIHKIR_							A0A178VBU3	RPS20B	40S ribosomal protein S20-2	U0	97.86	50588000
AGLEAPLEQIHKIR	1	Unmodified					_AGLEAPLEQIHKIR_							A0A178VBU3	RPS20B	40S ribosomal protein S20-2	U50	71.879	3516600
AYEPMKPTK	1	Acetyl (Protein N-term),Oxidation (M)	1			1	_(ac)AYEPM(ox)KPTK_			AYEPM(1)KPTK			AYEPM(87.64)KPTK	A0A178VBU3	RPS20B	40S ribosomal protein S20-2	U0	87.639	51044000
AYEPMKPTK	1	Acetyl (Protein N-term)	1				_(ac)AYEPMKPTK_							A0A178VBU3	RPS20B	40S ribosomal protein S20-2	U0	109.71	131850000
AYEPMKPTK	1	Acetyl (Protein N-term),Oxidation (M)	1			1	_(ac)AYEPM(ox)KPTK_			AYEPM(1)KPTK			AYEPM(53.77)KPTK	A0A178VBU3	RPS20B	40S ribosomal protein S20-2	U50	53.775	3773600
AYEPMKPTK	1	Acetyl (Protein N-term)	1				_(ac)AYEPMKPTK_							A0A178VBU3	RPS20B	40S ribosomal protein S20-2	U50	99.442
TWVIDKPGLPK	1	Unmodified					_TWVIDKPGLPK_							A0A178VBW3	MBD4	Methyl-CpG-binding domain-containing protein 4	U50	38.791	6514300
VIDSQEEYEDIRSK	1	Unmodified					_VIDSQEEYEDIRSK_							A0A178VBW3	MBD4	Methyl-CpG-binding domain-containing protein 4	U0	NaN	4366000
VIDSQEEYEDIRSK	1	Unmodified					_VIDSQEEYEDIRSK_							A0A178VBW3	MBD4	Methyl-CpG-binding domain-containing protein 4	U50	72.417	9979000
LSLAGYPR	0	Unmodified					_LSLAGYPR_							A0A178VBZ1	HUA1	Zinc finger CCCH domain-containing protein 37	U0	110.63
REGALNCPYYMK	1	Unmodified					_REGALNCPYYMK_							A0A178VBZ1	HUA1	Zinc finger CCCH domain-containing protein 37	U0	93.839	12674000
TTSEADAAGATNTDTTQ	0	Unmodified					_TTSEADAAGATNTDTTQ_							A0A178VBZ1	HUA1	Zinc finger CCCH domain-containing protein 37	U0	122.51	10122000
TTSEADAAGATNTDTTQ	0	Unmodified					_TTSEADAAGATNTDTTQ_							A0A178VBZ1	HUA1	Zinc finger CCCH domain-containing protein 37	U50	NaN	2120400
YGATCKFDHPPPGEVMAK	1	Unmodified					_YGATCKFDHPPPGEVMAK_							A0A178VBZ1	HUA1	Zinc finger CCCH domain-containing protein 37	U0	29.892	9366200
STHSATVVDDLKYR	1	Unmodified					_STHSATVVDDLKYR_							A0A178VCU6	SYP32	Syntaxin-32	U50	52.823	3939800
MVAEAEHHKFER	1	Unmodified					_MVAEAEHHKFER_							A0A178VD46	TIC	Protein TIME FOR COFFEE	U50	72.705	1104000
VTEVETEAKPLLKEDR	2	Unmodified					_VTEVETEAKPLLKEDR_							A0A178VD46	TIC	Protein TIME FOR COFFEE	U0	NaN	3067500
VTEVETEAKPLLKEDR	2	Unmodified					_VTEVETEAKPLLKEDR_							A0A178VD46	TIC	Protein TIME FOR COFFEE	U0	NaN	3877200
VTEVETEAKPLLKEDR	2	Unmodified					_VTEVETEAKPLLKEDR_							A0A178VD46	TIC	Protein TIME FOR COFFEE	U50	119.56	25271000
VTEVETEAKPLLKEDR	2	Unmodified					_VTEVETEAKPLLKEDR_							A0A178VD46	TIC	Protein TIME FOR COFFEE	U50	167.69	11862000
ASSSDHTAKIIDGK	1	Acetyl (Protein N-term)	1				_(ac)ASSSDHTAKIIDGK_							A0A178VD60	FOLD2	Bifunctional protein FolD 2;Methylenetetrahydrofolate dehydrogenase;Methenyltetrahydrofolate cyclohydrolase	U50	92.935	9357700
GCLELLAR	0	Unmodified					_GCLELLAR_							A0A178VD60	FOLD2	Bifunctional protein FolD 2;Methylenetetrahydrofolate dehydrogenase;Methenyltetrahydrofolate cyclohydrolase	U0	NaN	1730000
GCLELLAR	0	Unmodified					_GCLELLAR_							A0A178VD60	FOLD2	Bifunctional protein FolD 2;Methylenetetrahydrofolate dehydrogenase;Methenyltetrahydrofolate cyclohydrolase	U50	128.82	21973000
GREPLFLPCTPK	1	Unmodified					_GREPLFLPCTPK_							A0A178VD60	FOLD2	Bifunctional protein FolD 2;Methylenetetrahydrofolate dehydrogenase;Methenyltetrahydrofolate cyclohydrolase	U0	NaN	3033000
GREPLFLPCTPK	1	Unmodified					_GREPLFLPCTPK_							A0A178VD60	FOLD2	Bifunctional protein FolD 2;Methylenetetrahydrofolate dehydrogenase;Methenyltetrahydrofolate cyclohydrolase	U50	62.162	27348000
HGKVPGLAVVIVGSR	1	Unmodified					_HGKVPGLAVVIVGSR_							A0A178VD60	FOLD2	Bifunctional protein FolD 2;Methylenetetrahydrofolate dehydrogenase;Methenyltetrahydrofolate cyclohydrolase	U50	53.168	10268000
SEIAEEVRGLSEK	1	Unmodified					_SEIAEEVRGLSEK_							A0A178VD60	FOLD2	Bifunctional protein FolD 2;Methylenetetrahydrofolate dehydrogenase;Methenyltetrahydrofolate cyclohydrolase	U50	38.399	8844300
VPGLAVVIVGSR	0	Unmodified					_VPGLAVVIVGSR_							A0A178VD60	FOLD2	Bifunctional protein FolD 2;Methylenetetrahydrofolate dehydrogenase;Methenyltetrahydrofolate cyclohydrolase	U50	81.771	4427200
VPGLAVVIVGSRK	1	Unmodified					_VPGLAVVIVGSRK_							A0A178VD60	FOLD2	Bifunctional protein FolD 2;Methylenetetrahydrofolate dehydrogenase;Methenyltetrahydrofolate cyclohydrolase	U50	53.001	3807300
AATAAASVVR	0	Acetyl (Protein N-term)	1				_(ac)AATAAASVVR_							A0A178VD66	RH14	DEAD-box ATP-dependent RNA helicase 14	U0	65.404	5511800
IQDKEGIPPDQQR	1	Unmodified					_IQDKEGIPPDQQR_							A0A178VD86	SEN3;UBQ11;UBQ10;UBQ3;UBQ13;T8F5.13;At5g20620;RPL40B;RPL40A;RUB2;RUB1;RPS27AA;RPS27AC;RPS27AB;UBQ12;UBQ14;UBQ9;UBQ4	Ubiquitin-60S ribosomal protein L40-2;Ubiquitin;60S ribosomal protein L40-2;Ubiquitin-60S ribosomal protein L40-1;Ubiquitin;60S ribosomal protein L40-1;Ubiquitin-NEDD8-like protein RUB2;Ubiquitin;NEDD8-like protein RUB2;Ubiquitin-NEDD8-like protein RUB1;Ubiquitin;NEDD8-like protein RUB1;Ubiquitin-40S ribosomal protein S27a-1;Ubiquitin;40S ribosomal protein S27a-1;Ubiquitin-40S ribosomal protein S…	U0	53.377	2071400
IQDKEGIPPDQQR	1	Unmodified					_IQDKEGIPPDQQR_							A0A178VD86	SEN3;UBQ11;UBQ10;UBQ3;UBQ13;T8F5.13;At5g20620;RPL40B;RPL40A;RUB2;RUB1;RPS27AA;RPS27AC;RPS27AB;UBQ12;UBQ14;UBQ9;UBQ4	Ubiquitin-60S ribosomal protein L40-2;Ubiquitin;60S ribosomal protein L40-2;Ubiquitin-60S ribosomal protein L40-1;Ubiquitin;60S ribosomal protein L40-1;Ubiquitin-NEDD8-like protein RUB2;Ubiquitin;NEDD8-like protein RUB2;Ubiquitin-NEDD8-like protein RUB1;Ubiquitin;NEDD8-like protein RUB1;Ubiquitin-40S ribosomal protein S27a-1;Ubiquitin;40S ribosomal protein S27a-1;Ubiquitin-40S ribosomal protein S…	U50	43.03	2373700
TLADYNIQKESTLHLVLR	1	Unmodified					_TLADYNIQKESTLHLVLR_							A0A178VD86	SEN3;UBQ11;UBQ10;UBQ3;UBQ13;T8F5.13;At5g20620;RPL40B;RPL40A;RUB2;RUB1;RPS27AA;RPS27AC;RPS27AB;UBQ12;UBQ14;UBQ9;UBQ4;UBQ8	Ubiquitin-60S ribosomal protein L40-2;Ubiquitin;60S ribosomal protein L40-2;Ubiquitin-60S ribosomal protein L40-1;Ubiquitin;60S ribosomal protein L40-1;Ubiquitin-NEDD8-like protein RUB2;Ubiquitin;NEDD8-like protein RUB2;Ubiquitin-NEDD8-like protein RUB1;Ubiquitin;NEDD8-like protein RUB1;Ubiquitin-40S ribosomal protein S27a-1;Ubiquitin;40S ribosomal protein S27a-1;Ubiquitin-40S ribosomal protein S…	U0	34.721	1538400
TLADYNIQKESTLHLVLR	1	Unmodified					_TLADYNIQKESTLHLVLR_							A0A178VD86	SEN3;UBQ11;UBQ10;UBQ3;UBQ13;T8F5.13;At5g20620;RPL40B;RPL40A;RUB2;RUB1;RPS27AA;RPS27AC;RPS27AB;UBQ12;UBQ14;UBQ9;UBQ4;UBQ8	Ubiquitin-60S ribosomal protein L40-2;Ubiquitin;60S ribosomal protein L40-2;Ubiquitin-60S ribosomal protein L40-1;Ubiquitin;60S ribosomal protein L40-1;Ubiquitin-NEDD8-like protein RUB2;Ubiquitin;NEDD8-like protein RUB2;Ubiquitin-NEDD8-like protein RUB1;Ubiquitin;NEDD8-like protein RUB1;Ubiquitin-40S ribosomal protein S27a-1;Ubiquitin;40S ribosomal protein S27a-1;Ubiquitin-40S ribosomal protein S…	U50	35.872	2041200
IEEKQKQVVVEK	2	Unmodified					_IEEKQKQVVVEK_							A0A178VEL2	ADF1	Actin-depolymerizing factor 1	U0	95.094	499530
IEEKQKQVVVEK	2	Unmodified					_IEEKQKQVVVEK_							A0A178VEL2	ADF1	Actin-depolymerizing factor 1	U50	NaN	211690
IFFIAWCPDIAK	0	Unmodified					_IFFIAWCPDIAK_							A0A178VEL2	ADF1	Actin-depolymerizing factor 1	U0	122.96	84006000
IFFIAWCPDIAK	0	Unmodified					_IFFIAWCPDIAK_							A0A178VEL2	ADF1	Actin-depolymerizing factor 1	U50	112.3	317970000
QKQVVVEKVGQPIQTYEEFAACLPADECR	2	Unmodified					_QKQVVVEKVGQPIQTYEEFAACLPADECR_							A0A178VEL2	ADF1	Actin-depolymerizing factor 1	U0	NaN	6350400
QKQVVVEKVGQPIQTYEEFAACLPADECR	2	Unmodified					_QKQVVVEKVGQPIQTYEEFAACLPADECR_							A0A178VEL2	ADF1	Actin-depolymerizing factor 1	U50	233.22	64284000
SKIFFIAWCPDIAK	1	Unmodified					_SKIFFIAWCPDIAK_							A0A178VEL2	ADF1	Actin-depolymerizing factor 1	U0	32.329	113060000
SKIFFIAWCPDIAK	1	Unmodified					_SKIFFIAWCPDIAK_							A0A178VEL2	ADF1	Actin-depolymerizing factor 1	U50	51.591	534190000
SKIFFIAWCPDIAKVR	2	Unmodified					_SKIFFIAWCPDIAKVR_							A0A178VEL2	ADF1	Actin-depolymerizing factor 1	U50	73.464	23096000
VGQPIQTYEEFAACLPADECR	0	Unmodified					_VGQPIQTYEEFAACLPADECR_							A0A178VEL2	ADF1	Actin-depolymerizing factor 1	U0	160.95	122840000
VGQPIQTYEEFAACLPADECR	0	Unmodified					_VGQPIQTYEEFAACLPADECR_							A0A178VEL2	ADF1	Actin-depolymerizing factor 1	U0	288.45	44422000
VGQPIQTYEEFAACLPADECR	0	Methyl (KR)			1		_VGQPIQTYEEFAACLPADECR(me)_		VGQPIQTYEEFAACLPADECR(1)			VGQPIQTYEEFAACLPADECR(113.59)		A0A178VEL2	ADF1	Actin-depolymerizing factor 1	U0	113.59	8959900
VGQPIQTYEEFAACLPADECR	0	Unmodified					_VGQPIQTYEEFAACLPADECR_							A0A178VEL2	ADF1	Actin-depolymerizing factor 1	U50	171.47	1027600000
VGQPIQTYEEFAACLPADECR	0	Unmodified					_VGQPIQTYEEFAACLPADECR_							A0A178VEL2	ADF1	Actin-depolymerizing factor 1	U50	289.67	417800000
VGQPIQTYEEFAACLPADECR	0	Methyl (KR)			1		_VGQPIQTYEEFAACLPADECR(me)_		VGQPIQTYEEFAACLPADECR(1)			VGQPIQTYEEFAACLPADECR(211.17)		A0A178VEL2	ADF1	Actin-depolymerizing factor 1	U50	211.17	64216000
EVTPEMFSK	0	Unmodified					_EVTPEMFSK_							A0A178VEY8	PVA11	Vesicle-associated protein 1-1;Vesicle-associated protein 1-1, N-terminally processed	U50	91.064	4599000
EAGHRVEETKLR	2	Unmodified					_EAGHRVEETKLR_							A0A178VEY8	PVA11;PVA12	Vesicle-associated protein 1-1;Vesicle-associated protein 1-1, N-terminally processed;Vesicle-associated protein 1-2;Vesicle-associated protein 1-2, N-terminally processed	U50	124.21	815920
GVAADLSHCNTPSQVR	0	Unmodified					_GVAADLSHCNTPSQVR_							A0A178VF16		Malate dehydrogenase, chloroplastic	U0	132.08	72521000
GVAADLSHCNTPSQVR	0	Unmodified					_GVAADLSHCNTPSQVR_							A0A178VF16		Malate dehydrogenase, chloroplastic	U50	NaN	45914000
AVSLALNKPK	1	Methyl (KR)			1		_AVSLALNK(me)PK_		AVSLALNK(0.972)PK(0.028)			AVSLALNK(15.37)PK(-15.37)		A0A178VFL2	SEC	Probable UDP-N-acetylglucosamine--peptide N-acetylglucosaminyltransferase SEC	U50	40.268	1424000
AINSLNGADLDGR	0	Unmodified					_AINSLNGADLDGR_							A0A178VFP8	CP29;CP29A	29 kDa ribonucleoprotein, chloroplastic	U0	96.229	5452400
VSEAEARPPRGQF	2	Unmodified					_VSEAEARPPRGQF_							A0A178VFP8	CP29;CP29A	29 kDa ribonucleoprotein, chloroplastic	U0	70.089	7082700
VSEAEARPPRGQF	2	Unmodified					_VSEAEARPPRGQF_							A0A178VFP8	CP29;CP29A	29 kDa ribonucleoprotein, chloroplastic	U50	NaN	3418100
DKVTNETIALKK	2	Unmodified					_DKVTNETIALKK_							A0A178VG41	CDKA-1	Cyclin-dependent kinase A-1	U0	105.66	9812900
DKVTNETIALKK	2	Unmodified					_DKVTNETIALKK_							A0A178VG41	CDKA-1	Cyclin-dependent kinase A-1	U50	NaN	1290100
DLKPQNLLIDRR	2	Unmodified					_DLKPQNLLIDRR_							A0A178VG41	CDKA-1	Cyclin-dependent kinase A-1	U0	101.56	6864600
DLKPQNLLIDRR	2	Unmodified					_DLKPQNLLIDRR_							A0A178VG41	CDKA-1	Cyclin-dependent kinase A-1	U50	NaN	1614200
GVTSLPDYK	0	Unmodified					_GVTSLPDYK_							A0A178VG41	CDKA-1	Cyclin-dependent kinase A-1	U0	98.458
IMGTPYEDTWR	0	Unmodified					_IMGTPYEDTWR_							A0A178VG41	CDKA-1	Cyclin-dependent kinase A-1	U0	106.18
IRLEQEDEGVPSTAIR	1	Unmodified					_IRLEQEDEGVPSTAIR_							A0A178VG41	CDKA-1	Cyclin-dependent kinase A-1	U0	29.092	8014000
LADFGLAR	0	Unmodified					_LADFGLAR_							A0A178VG41	CDKA-1;At5g66710;At5g01850;At5g50180;At5g40540;T20L15_120;ATN1;T3A5.100;CDKC2;CDKD-2;CDKD-3;CDKD-1;CDKC-1;PERK15;CDKC-2;CRK15	Cyclin-dependent kinase A-1;Cyclin-dependent kinase D-2;Cyclin-dependent kinase D-3;Cyclin-dependent kinase D-1;Cyclin-dependent kinase C-1;Proline-rich receptor-like protein kinase PERK15;Cyclin-dependent kinase C-2;Cysteine-rich receptor-like protein kinase 15	U0	179.16	12756000
LADFGLAR	0	Unmodified					_LADFGLAR_							A0A178VG41	CDKA-1;At5g66710;At5g01850;At5g50180;At5g40540;T20L15_120;ATN1;T3A5.100;CDKC2;CDKD-2;CDKD-3;CDKD-1;CDKC-1;PERK15;CDKC-2;CRK15	Cyclin-dependent kinase A-1;Cyclin-dependent kinase D-2;Cyclin-dependent kinase D-3;Cyclin-dependent kinase D-1;Cyclin-dependent kinase C-1;Proline-rich receptor-like protein kinase PERK15;Cyclin-dependent kinase C-2;Cysteine-rich receptor-like protein kinase 15	U50	NaN	1945900
DKPVGLGVR	1	Unmodified					_DKPVGLGVR_							A0A178VHG0	PRXIIE	Peroxiredoxin-2E, chloroplastic	U0	142.64	42390000
DKPVGLGVR	1	Unmodified					_DKPVGLGVR_							A0A178VHG0	PRXIIE	Peroxiredoxin-2E, chloroplastic	U50	133.9	30717000
DLGINDEVMLLSDGNGEFTGK	0	Oxidation (M)				1	_DLGINDEVM(ox)LLSDGNGEFTGK_			DLGINDEVM(1)LLSDGNGEFTGK			DLGINDEVM(169.51)LLSDGNGEFTGK	A0A178VHG0	PRXIIE	Peroxiredoxin-2E, chloroplastic	U0	169.51	22784000
HVPGFVSKAGELR	1	Unmodified					_HVPGFVSKAGELR_							A0A178VHG0	PRXIIE	Peroxiredoxin-2E, chloroplastic	U0	91.292	16187000
HVPGFVSKAGELR	1	Unmodified					_HVPGFVSKAGELR_							A0A178VHG0	PRXIIE	Peroxiredoxin-2E, chloroplastic	U50	108.5	30142000
KTILFAVPGAFTPTCSQK	1	Unmodified					_KTILFAVPGAFTPTCSQK_							A0A178VHG0	PRXIIE	Peroxiredoxin-2E, chloroplastic	U0	NaN	67596000
KTILFAVPGAFTPTCSQK	1	Unmodified					_KTILFAVPGAFTPTCSQK_							A0A178VHG0	PRXIIE	Peroxiredoxin-2E, chloroplastic	U50	92.474	28178000
LGVELDLR	0	Unmodified					_LGVELDLR_							A0A178VHG0	PRXIIE	Peroxiredoxin-2E, chloroplastic	U0	168.45	583720000
LGVELDLR	0	Unmodified					_LGVELDLR_							A0A178VHG0	PRXIIE	Peroxiredoxin-2E, chloroplastic	U0	126.57	13759000
LGVELDLR	0	Unmodified					_LGVELDLR_							A0A178VHG0	PRXIIE	Peroxiredoxin-2E, chloroplastic	U50	168.45	272810000
LGVELDLR	0	Unmodified					_LGVELDLR_							A0A178VHG0	PRXIIE	Peroxiredoxin-2E, chloroplastic	U50	NaN	7208300
LGVELDLRDKPVGLGVR	2	Unmodified					_LGVELDLRDKPVGLGVR_							A0A178VHG0	PRXIIE	Peroxiredoxin-2E, chloroplastic	U0	104.45	108740000
LGVELDLRDKPVGLGVR	2	Unmodified					_LGVELDLRDKPVGLGVR_							A0A178VHG0	PRXIIE	Peroxiredoxin-2E, chloroplastic	U0	195.6	77568000
LGVELDLRDKPVGLGVR	2	Unmodified					_LGVELDLRDKPVGLGVR_							A0A178VHG0	PRXIIE	Peroxiredoxin-2E, chloroplastic	U0	102.66	1866900
LGVELDLRDKPVGLGVR	2	Unmodified					_LGVELDLRDKPVGLGVR_							A0A178VHG0	PRXIIE	Peroxiredoxin-2E, chloroplastic	U50	82.259	66629000
LGVELDLRDKPVGLGVR	2	Unmodified					_LGVELDLRDKPVGLGVR_							A0A178VHG0	PRXIIE	Peroxiredoxin-2E, chloroplastic	U50	120.63	47143000
LGVELDLRDKPVGLGVR	2	Unmodified					_LGVELDLRDKPVGLGVR_							A0A178VHG0	PRXIIE	Peroxiredoxin-2E, chloroplastic	U50	NaN	1473900
LPDSTLSYLDPSTGDVK	0	Unmodified					_LPDSTLSYLDPSTGDVK_							A0A178VHG0	PRXIIE	Peroxiredoxin-2E, chloroplastic	U0	180.17	82108000
LPDSTLSYLDPSTGDVK	0	Unmodified					_LPDSTLSYLDPSTGDVK_							A0A178VHG0	PRXIIE	Peroxiredoxin-2E, chloroplastic	U0	64.52	17736000
LPDSTLSYLDPSTGDVK	0	Unmodified					_LPDSTLSYLDPSTGDVK_							A0A178VHG0	PRXIIE	Peroxiredoxin-2E, chloroplastic	U50	182.37	23378000
LPDSTLSYLDPSTGDVK	0	Unmodified					_LPDSTLSYLDPSTGDVK_							A0A178VHG0	PRXIIE	Peroxiredoxin-2E, chloroplastic	U50	NaN	4714400
LPDSTLSYLDPSTGDVKTVTVSSLTAGKK	2	Unmodified					_LPDSTLSYLDPSTGDVKTVTVSSLTAGKK_							A0A178VHG0	PRXIIE	Peroxiredoxin-2E, chloroplastic	U0	110.75	49993000
LPDSTLSYLDPSTGDVKTVTVSSLTAGKK	2	Unmodified					_LPDSTLSYLDPSTGDVKTVTVSSLTAGKK_							A0A178VHG0	PRXIIE	Peroxiredoxin-2E, chloroplastic	U50	116.24	16614000
RYAILADDGVVK	1	Unmodified					_RYAILADDGVVK_							A0A178VHG0	PRXIIE	Peroxiredoxin-2E, chloroplastic	U0	190.7	173520000
RYAILADDGVVK	1	Unmodified					_RYAILADDGVVK_							A0A178VHG0	PRXIIE	Peroxiredoxin-2E, chloroplastic	U0	89.629	340700000
RYAILADDGVVK	1	Unmodified					_RYAILADDGVVK_							A0A178VHG0	PRXIIE	Peroxiredoxin-2E, chloroplastic	U50	179.95	84257000
RYAILADDGVVK	1	Unmodified					_RYAILADDGVVK_							A0A178VHG0	PRXIIE	Peroxiredoxin-2E, chloroplastic	U50	71.806	174480000
RYAILADDGVVKVLNLEEGGAFTNSSAEDMLK	2	Unmodified					_RYAILADDGVVKVLNLEEGGAFTNSSAEDMLK_							A0A178VHG0	PRXIIE	Peroxiredoxin-2E, chloroplastic	U0	86.675	15092000
RYAILADDGVVKVLNLEEGGAFTNSSAEDMLK	2	Unmodified					_RYAILADDGVVKVLNLEEGGAFTNSSAEDMLK_							A0A178VHG0	PRXIIE	Peroxiredoxin-2E, chloroplastic	U50	NaN	7693500
TILFAVPGAFTPTCSQK	0	Unmodified					_TILFAVPGAFTPTCSQK_							A0A178VHG0	PRXIIE	Peroxiredoxin-2E, chloroplastic	U0	180.47	75340000
TILFAVPGAFTPTCSQK	0	Unmodified					_TILFAVPGAFTPTCSQK_							A0A178VHG0	PRXIIE	Peroxiredoxin-2E, chloroplastic	U50	142.51	42156000
TVTVSSLTAGK	0	Unmodified					_TVTVSSLTAGK_							A0A178VHG0	PRXIIE	Peroxiredoxin-2E, chloroplastic	U0	127.4	272500000
TVTVSSLTAGK	0	Unmodified					_TVTVSSLTAGK_							A0A178VHG0	PRXIIE	Peroxiredoxin-2E, chloroplastic	U50	119.68	146320000
TVTVSSLTAGKK	1	Unmodified					_TVTVSSLTAGKK_							A0A178VHG0	PRXIIE	Peroxiredoxin-2E, chloroplastic	U0	137.98	223090000
TVTVSSLTAGKK	1	Unmodified					_TVTVSSLTAGKK_							A0A178VHG0	PRXIIE	Peroxiredoxin-2E, chloroplastic	U50	140.17	129000000
VLNLEEGGAFTNSSAEDMLK	0	Oxidation (M)				1	_VLNLEEGGAFTNSSAEDM(ox)LK_			VLNLEEGGAFTNSSAEDM(1)LK			VLNLEEGGAFTNSSAEDM(73.76)LK	A0A178VHG0	PRXIIE	Peroxiredoxin-2E, chloroplastic	U0	73.76	85630000
VLNLEEGGAFTNSSAEDMLK	0	Oxidation (M)				1	_VLNLEEGGAFTNSSAEDM(ox)LK_			VLNLEEGGAFTNSSAEDM(1)LK			VLNLEEGGAFTNSSAEDM(228.17)LK	A0A178VHG0	PRXIIE	Peroxiredoxin-2E, chloroplastic	U0	228.17	83689000
VLNLEEGGAFTNSSAEDMLK	0	Unmodified					_VLNLEEGGAFTNSSAEDMLK_							A0A178VHG0	PRXIIE	Peroxiredoxin-2E, chloroplastic	U0	259	264430000
VLNLEEGGAFTNSSAEDMLK	0	Unmodified					_VLNLEEGGAFTNSSAEDMLK_							A0A178VHG0	PRXIIE	Peroxiredoxin-2E, chloroplastic	U0	155.88	140340000
VLNLEEGGAFTNSSAEDMLK	0	Oxidation (M)				1	_VLNLEEGGAFTNSSAEDM(ox)LK_			VLNLEEGGAFTNSSAEDM(1)LK			VLNLEEGGAFTNSSAEDM(209.87)LK	A0A178VHG0	PRXIIE	Peroxiredoxin-2E, chloroplastic	U50	209.87	31027000
VLNLEEGGAFTNSSAEDMLK	0	Oxidation (M)				1	_VLNLEEGGAFTNSSAEDM(ox)LK_			VLNLEEGGAFTNSSAEDM(1)LK			VLNLEEGGAFTNSSAEDM(62.62)LK	A0A178VHG0	PRXIIE	Peroxiredoxin-2E, chloroplastic	U50	62.617	33761000
VLNLEEGGAFTNSSAEDMLK	0	Unmodified					_VLNLEEGGAFTNSSAEDMLK_							A0A178VHG0	PRXIIE	Peroxiredoxin-2E, chloroplastic	U50	288.77	78018000
VLNLEEGGAFTNSSAEDMLK	0	Unmodified					_VLNLEEGGAFTNSSAEDMLK_							A0A178VHG0	PRXIIE	Peroxiredoxin-2E, chloroplastic	U50	98.175	37902000
VLNLEEGGAFTNSSAEDMLKAL	1	Oxidation (M)				1	_VLNLEEGGAFTNSSAEDM(ox)LKAL_			VLNLEEGGAFTNSSAEDM(1)LKAL			VLNLEEGGAFTNSSAEDM(129.93)LKAL	A0A178VHG0	PRXIIE	Peroxiredoxin-2E, chloroplastic	U0	129.93	12969000
VLNLEEGGAFTNSSAEDMLKAL	1	Oxidation (M)				1	_VLNLEEGGAFTNSSAEDM(ox)LKAL_							A0A178VHG0	PRXIIE	Peroxiredoxin-2E, chloroplastic	U50	NaN	6535400
YAILADDGVVK	0	Unmodified					_YAILADDGVVK_							A0A178VHG0	PRXIIE	Peroxiredoxin-2E, chloroplastic	U0	149.82	1074700000
YAILADDGVVK	0	Unmodified					_YAILADDGVVK_							A0A178VHG0	PRXIIE	Peroxiredoxin-2E, chloroplastic	U50	NaN	570200000
YAILADDGVVKVLNLEEGGAFTNSSAEDMLK	1	Oxidation (M)				1	_YAILADDGVVKVLNLEEGGAFTNSSAEDM(ox)LK_			YAILADDGVVKVLNLEEGGAFTNSSAEDM(1)LK			YAILADDGVVKVLNLEEGGAFTNSSAEDM(51.32)LK	A0A178VHG0	PRXIIE	Peroxiredoxin-2E, chloroplastic	U0	51.323	48247000
AVPYDPKYHEEWIR	1	Unmodified					_AVPYDPKYHEEWIR_							A0A178VHP9	MORF8;At1g53260	Multiple organellar RNA editing factor 8, chloroplastic/mitochondrial	U0	106.13	39513000
AVPYDPKYHEEWIR	1	Unmodified					_AVPYDPKYHEEWIR_							A0A178VHP9	MORF8;At1g53260	Multiple organellar RNA editing factor 8, chloroplastic/mitochondrial	U0	105.95	83052000
AVPYDPKYHEEWIR	1	Unmodified					_AVPYDPKYHEEWIR_							A0A178VHP9	MORF8;At1g53260	Multiple organellar RNA editing factor 8, chloroplastic/mitochondrial	U50	85.837	39108000
AVPYDPKYHEEWIR	1	Unmodified					_AVPYDPKYHEEWIR_							A0A178VHP9	MORF8;At1g53260	Multiple organellar RNA editing factor 8, chloroplastic/mitochondrial	U50	NaN	70901000
AVPYDPKYHEEWIRNNAR	2	Unmodified					_AVPYDPKYHEEWIRNNAR_							A0A178VHP9	MORF8	Multiple organellar RNA editing factor 8, chloroplastic/mitochondrial	U0	97.579	64335000
AVPYDPKYHEEWIRNNAR	2	Unmodified					_AVPYDPKYHEEWIRNNAR_							A0A178VHP9	MORF8	Multiple organellar RNA editing factor 8, chloroplastic/mitochondrial	U0	108.14	37176000
AVPYDPKYHEEWIRNNAR	2	Unmodified					_AVPYDPKYHEEWIRNNAR_							A0A178VHP9	MORF8	Multiple organellar RNA editing factor 8, chloroplastic/mitochondrial	U0	146.78	19220000
AVPYDPKYHEEWIRNNAR	2	Unmodified					_AVPYDPKYHEEWIRNNAR_							A0A178VHP9	MORF8	Multiple organellar RNA editing factor 8, chloroplastic/mitochondrial	U50	137.61	95626000
AVPYDPKYHEEWIRNNAR	2	Unmodified					_AVPYDPKYHEEWIRNNAR_							A0A178VHP9	MORF8	Multiple organellar RNA editing factor 8, chloroplastic/mitochondrial	U50	146.78	50647000
AVPYDPKYHEEWIRNNAR	2	Unmodified					_AVPYDPKYHEEWIRNNAR_							A0A178VHP9	MORF8	Multiple organellar RNA editing factor 8, chloroplastic/mitochondrial	U50	169.25	25224000
CYYAFGALVSEDLSHK	0	Unmodified					_CYYAFGALVSEDLSHK_							A0A178VHP9	MORF8	Multiple organellar RNA editing factor 8, chloroplastic/mitochondrial	U0	150.34	22648000
CYYAFGALVSEDLSHK	0	Unmodified					_CYYAFGALVSEDLSHK_							A0A178VHP9	MORF8	Multiple organellar RNA editing factor 8, chloroplastic/mitochondrial	U50	81.448	18668000
DYGGEPFIDGK	0	Unmodified					_DYGGEPFIDGK_							A0A178VHP9	MORF8;At1g53260	Multiple organellar RNA editing factor 8, chloroplastic/mitochondrial	U0	93.556	25673000
DYGGEPFIDGK	0	Unmodified					_DYGGEPFIDGK_							A0A178VHP9	MORF8;At1g53260	Multiple organellar RNA editing factor 8, chloroplastic/mitochondrial	U50	NaN	26476000
MKIYSVSTR	1	Unmodified					_MKIYSVSTR_							A0A178VHP9	MORF8	Multiple organellar RNA editing factor 8, chloroplastic/mitochondrial	U0	170.3	19258000
MKIYSVSTR	1	Unmodified					_MKIYSVSTR_							A0A178VHP9	MORF8	Multiple organellar RNA editing factor 8, chloroplastic/mitochondrial	U50	163.2	18135000
NKDYGGEPFIDGK	1	Unmodified					_NKDYGGEPFIDGK_							A0A178VHP9	MORF8;At1g53260	Multiple organellar RNA editing factor 8, chloroplastic/mitochondrial	U0	99.669	263910000
NKDYGGEPFIDGK	1	Unmodified					_NKDYGGEPFIDGK_							A0A178VHP9	MORF8;At1g53260	Multiple organellar RNA editing factor 8, chloroplastic/mitochondrial	U0	234.24	90752000
NKDYGGEPFIDGK	1	Unmodified					_NKDYGGEPFIDGK_							A0A178VHP9	MORF8;At1g53260	Multiple organellar RNA editing factor 8, chloroplastic/mitochondrial	U50	110.9	244970000
NKDYGGEPFIDGK	1	Unmodified					_NKDYGGEPFIDGK_							A0A178VHP9	MORF8;At1g53260	Multiple organellar RNA editing factor 8, chloroplastic/mitochondrial	U50	217.62	91033000
TLAQIVGSEDEAR	0	Unmodified					_TLAQIVGSEDEAR_							A0A178VHP9	MORF8	Multiple organellar RNA editing factor 8, chloroplastic/mitochondrial	U0	253.71	375050000
TLAQIVGSEDEAR	0	Unmodified					_TLAQIVGSEDEAR_							A0A178VHP9	MORF8	Multiple organellar RNA editing factor 8, chloroplastic/mitochondrial	U0	109	45274000
TLAQIVGSEDEAR	0	Unmodified					_TLAQIVGSEDEAR_							A0A178VHP9	MORF8	Multiple organellar RNA editing factor 8, chloroplastic/mitochondrial	U50	280.49	304200000
TLAQIVGSEDEAR	0	Unmodified					_TLAQIVGSEDEAR_							A0A178VHP9	MORF8	Multiple organellar RNA editing factor 8, chloroplastic/mitochondrial	U50	129.71	43490000
TLAQIVGSEDEARMK	1	Unmodified					_TLAQIVGSEDEARMK_							A0A178VHP9	MORF8	Multiple organellar RNA editing factor 8, chloroplastic/mitochondrial	U0	117.08	117770000
TLAQIVGSEDEARMK	1	Unmodified					_TLAQIVGSEDEARMK_							A0A178VHP9	MORF8	Multiple organellar RNA editing factor 8, chloroplastic/mitochondrial	U0	224.66	12702000
TLAQIVGSEDEARMK	1	Unmodified					_TLAQIVGSEDEARMK_							A0A178VHP9	MORF8	Multiple organellar RNA editing factor 8, chloroplastic/mitochondrial	U50	123.76	110250000
TLAQIVGSEDEARMK	1	Unmodified					_TLAQIVGSEDEARMK_							A0A178VHP9	MORF8	Multiple organellar RNA editing factor 8, chloroplastic/mitochondrial	U50	278.95	13394000
TLAQIVGSEDEARMK	1	Oxidation (M)				1	_TLAQIVGSEDEARM(ox)K_			TLAQIVGSEDEARM(1)K			TLAQIVGSEDEARM(113.94)K	A0A178VHP9	MORF8	Multiple organellar RNA editing factor 8, chloroplastic/mitochondrial	U50	113.94	38996000
TLAQIVGSEDEARMK	1	Oxidation (M)				1	_TLAQIVGSEDEARM(ox)K_			TLAQIVGSEDEARM(1)K			TLAQIVGSEDEARM(103.43)K	A0A178VHP9	MORF8	Multiple organellar RNA editing factor 8, chloroplastic/mitochondrial	U50	103.43	4221000
WVLPDSYLDVR	0	Unmodified					_WVLPDSYLDVR_							A0A178VHP9	MORF8	Multiple organellar RNA editing factor 8, chloroplastic/mitochondrial	U0	108.57	22077000
WVLPDSYLDVR	0	Unmodified					_WVLPDSYLDVR_							A0A178VHP9	MORF8	Multiple organellar RNA editing factor 8, chloroplastic/mitochondrial	U50	74.424	51490000
YHEEWIR	0	Unmodified					_YHEEWIR_							A0A178VHP9	MORF8;At1g53260	Multiple organellar RNA editing factor 8, chloroplastic/mitochondrial	U0	177.57	7836500
YHEEWIR	0	Unmodified					_YHEEWIR_							A0A178VHP9	MORF8;At1g53260	Multiple organellar RNA editing factor 8, chloroplastic/mitochondrial	U50	NaN	9599800
YHEEWIRNNAR	1	Unmodified					_YHEEWIRNNAR_							A0A178VHP9	MORF8	Multiple organellar RNA editing factor 8, chloroplastic/mitochondrial	U50	32.999	5303200
AQGDADSGVDRLWQK	1	Unmodified					_AQGDADSGVDRLWQK_							A0A178VHY5	RPS21B;RPS21C	40S ribosomal protein S21;40S ribosomal protein S21-1;40S ribosomal protein S21-2	U0	90.229	8971000
VVAHPDVPFYLYTTPPK	0	Unmodified					_VVAHPDVPFYLYTTPPK_							A0A178VI07	PUX1	Plant UBX domain-containing protein 1	U50	84.874	5086200
LLETIVTSGGVR	0	Unmodified					_LLETIVTSGGVR_							A0A178VIA7	At3g16270	VHS domain-containing protein At3g16270	U0	87.258	1552800
LLETIVTSGGVR	0	Unmodified					_LLETIVTSGGVR_							A0A178VIA7	At3g16270	VHS domain-containing protein At3g16270	U50	NaN	2777600
MLAEINQQLK	0	Unmodified					_MLAEINQQLK_							A0A178VJ44	PCMP-H76	Pentatricopeptide repeat-containing protein At3g47530	U0	169.06	3724900
MLAEINQQLK	0	Unmodified					_MLAEINQQLK_							A0A178VJ44	PCMP-H76	Pentatricopeptide repeat-containing protein At3g47530	U50	141.52	4244000
TLTSVLGCEEEAKKK	2	Unmodified					_TLTSVLGCEEEAKKK_							A0A178VJ70	MORF3	Multiple organellar RNA editing factor 3, mitochondrial	U0	NaN	12924000
TLTSVLGCEEEAKKK	2	Unmodified					_TLTSVLGCEEEAKKK_							A0A178VJ70	MORF3	Multiple organellar RNA editing factor 3, mitochondrial	U0	NaN	10763000
TLTSVLGCEEEAKKK	2	Unmodified					_TLTSVLGCEEEAKKK_							A0A178VJ70	MORF3	Multiple organellar RNA editing factor 3, mitochondrial	U50	121.45	30498000
TLTSVLGCEEEAKKK	2	Unmodified					_TLTSVLGCEEEAKKK_							A0A178VJ70	MORF3	Multiple organellar RNA editing factor 3, mitochondrial	U50	126.71	26002000
AFARFPTFNMAK	1	Unmodified					_AFARFPTFNMAK_							A0A178VK06	T27C4.15		U0	NaN	2821200
AFARFPTFNMAK	1	Unmodified					_AFARFPTFNMAK_							A0A178VK06	T27C4.15		U50	29.805	4437000
FPTFNMAK	0	Unmodified					_FPTFNMAK_							A0A178VK06	T27C4.15		U0	120.49	12097000
FPTFNMAK	0	Unmodified					_FPTFNMAK_							A0A178VK06	T27C4.15		U50	134.06	21061000
LFCGDLGNEVNDDVLSK	0	Unmodified					_LFCGDLGNEVNDDVLSK_							A0A178VK06	T27C4.15		U0	141.13	3310700
LFCGDLGNEVNDDVLSK	0	Unmodified					_LFCGDLGNEVNDDVLSK_							A0A178VK06	T27C4.15		U50	NaN	1554500
AIFLDRIK	1	Unmodified					_AIFLDRIK_							A0A178VK18		6-phosphogluconate dehydrogenase, decarboxylating 3	U50	120.62	5453200
ERLPANLVQAQR	1	Unmodified					_ERLPANLVQAQR_							A0A178VK18		6-phosphogluconate dehydrogenase, decarboxylating 3	U50	134.38	27938000
TDVEGSFHTEWFK	0	Unmodified					_TDVEGSFHTEWFK_							A0A178VK18		6-phosphogluconate dehydrogenase, decarboxylating 3	U50	41.621	4086700
LPANLVQAQR	0	Unmodified					_LPANLVQAQR_							A0A178VK18		6-phosphogluconate dehydrogenase, decarboxylating 3;6-phosphogluconate dehydrogenase, decarboxylating 1, chloroplastic;6-phosphogluconate dehydrogenase, decarboxylating 2, chloroplastic	U50	151.29	31608000
ELQEFKPASDAPAITSSDLGCK	1	Unmodified					_ELQEFKPASDAPAITSSDLGCK_							A0A178VK31	CYS6	Cysteine proteinase inhibitor 6	U0	135.31	15953000
ELQEFKPASDAPAITSSDLGCK	1	Unmodified					_ELQEFKPASDAPAITSSDLGCK_							A0A178VK31	CYS6	Cysteine proteinase inhibitor 6	U50	NaN	4759500
ENALLEFAR	0	Unmodified					_ENALLEFAR_							A0A178VK31	CYS6	Cysteine proteinase inhibitor 6	U0	180.87	17052000
ENALLEFAR	0	Unmodified					_ENALLEFAR_							A0A178VK31	CYS6	Cysteine proteinase inhibitor 6	U50	146.58	7859900
FAVDEHNKKENALLEFAR	2	Unmodified					_FAVDEHNKKENALLEFAR_							A0A178VK31	CYS6	Cysteine proteinase inhibitor 6	U0	105.06	20666000
FAVDEHNKKENALLEFAR	2	Unmodified					_FAVDEHNKKENALLEFAR_							A0A178VK31	CYS6	Cysteine proteinase inhibitor 6	U50	NaN	42263000
ALVGGVGDVPANQNSGEVESLAR	0	Acetyl (Protein N-term)	1				_(ac)ALVGGVGDVPANQNSGEVESLAR_							A0A178VK31			U0	102.6	98287000
ALVGGVGDVPANQNSGEVESLAR	0	Acetyl (Protein N-term)	1				_(ac)ALVGGVGDVPANQNSGEVESLAR_							A0A178VK31			U50	71.527	47501000
GMDVVQGIEK	0	Unmodified					_GMDVVQGIEK_							A0A178VKK0	CYP71	Peptidyl-prolyl cis-trans isomerase CYP71	U50	93.649	12246000
YFHALGAGVIEEVR	0	Unmodified					_YFHALGAGVIEEVR_							A0A178VL18	UBP1C	Oligouridylate-binding protein 1C	U0	NaN	2362000
YFHALGAGVIEEVR	0	Unmodified					_YFHALGAGVIEEVR_							A0A178VL18	UBP1C	Oligouridylate-binding protein 1C	U50	64.65	10935000
DVAVFDVDVNQGRR	1	Methyl (KR)			1		_DVAVFDVDVNQGRR(me)_		DVAVFDVDVNQGR(0.18)R(0.82)			DVAVFDVDVNQGR(-6.58)R(6.58)		A0A178VLE1			U0	41.621	30199000
DVAVFDVDVNQGRR	1	Methyl (KR)			1		_DVAVFDVDVNQGRR(me)_							A0A178VLE1			U50	NaN	92128000
ARPSAESLDELVK	1	Unmodified					_ARPSAESLDELVK_							A0A178VLU2	MDAR1	Probable monodehydroascorbate reductase, cytoplasmic isoform 3	U0	185.25	9811500
ARPSAESLDELVK	1	Unmodified					_ARPSAESLDELVK_							A0A178VLU2	MDAR1	Probable monodehydroascorbate reductase, cytoplasmic isoform 3	U0	139.86	32107000
ARPSAESLDELVK	1	Unmodified					_ARPSAESLDELVK_							A0A178VLU2	MDAR1	Probable monodehydroascorbate reductase, cytoplasmic isoform 3	U50	158.06	7532100
ARPSAESLDELVK	1	Unmodified					_ARPSAESLDELVK_							A0A178VLU2	MDAR1	Probable monodehydroascorbate reductase, cytoplasmic isoform 3	U50	53.038	28072000
EAVAPYERPALSK	1	Unmodified					_EAVAPYERPALSK_							A0A178VLU2	MDAR1	Probable monodehydroascorbate reductase, cytoplasmic isoform 3	U0	108.5	159260000
EAVAPYERPALSK	1	Unmodified					_EAVAPYERPALSK_							A0A178VLU2	MDAR1	Probable monodehydroascorbate reductase, cytoplasmic isoform 3	U0	165.39	21996000
EAVAPYERPALSK	1	Unmodified					_EAVAPYERPALSK_							A0A178VLU2	MDAR1	Probable monodehydroascorbate reductase, cytoplasmic isoform 3	U50	117.27	274290000
EAVAPYERPALSK	1	Unmodified					_EAVAPYERPALSK_							A0A178VLU2	MDAR1	Probable monodehydroascorbate reductase, cytoplasmic isoform 3	U50	172.61	33356000
EAVAPYERPALSKGYLFPEGAAR	2	Unmodified					_EAVAPYERPALSKGYLFPEGAAR_							A0A178VLU2	MDAR1	Probable monodehydroascorbate reductase, cytoplasmic isoform 3	U50	61.136	8243600
EFANQGVQPGELAVISK	0	Unmodified					_EFANQGVQPGELAVISK_							A0A178VLU2	MDAR1	Probable monodehydroascorbate reductase, cytoplasmic isoform 3	U0	172.58	41354000
EFANQGVQPGELAVISK	0	Unmodified					_EFANQGVQPGELAVISK_							A0A178VLU2	MDAR1	Probable monodehydroascorbate reductase, cytoplasmic isoform 3	U0	85.362	15696000
EFANQGVQPGELAVISK	0	Unmodified					_EFANQGVQPGELAVISK_							A0A178VLU2	MDAR1	Probable monodehydroascorbate reductase, cytoplasmic isoform 3	U50	157.33	57731000
EFANQGVQPGELAVISK	0	Unmodified					_EFANQGVQPGELAVISK_							A0A178VLU2	MDAR1	Probable monodehydroascorbate reductase, cytoplasmic isoform 3	U50	72.953	24379000
EIDDADKLVEAIK	1	Unmodified					_EIDDADKLVEAIK_							A0A178VLU2	MDAR1	Probable monodehydroascorbate reductase, cytoplasmic isoform 3	U0	217.45	16310000
EIDDADKLVEAIK	1	Unmodified					_EIDDADKLVEAIK_							A0A178VLU2	MDAR1	Probable monodehydroascorbate reductase, cytoplasmic isoform 3	U0	NaN	50301000
EIDDADKLVEAIK	1	Unmodified					_EIDDADKLVEAIK_							A0A178VLU2	MDAR1	Probable monodehydroascorbate reductase, cytoplasmic isoform 3	U50	67.019	75405000
EIDDADKLVEAIK	1	Unmodified					_EIDDADKLVEAIK_							A0A178VLU2	MDAR1	Probable monodehydroascorbate reductase, cytoplasmic isoform 3	U50	226.33	20264000
EIDDADKLVEAIKAK	2	Unmodified					_EIDDADKLVEAIKAK_							A0A178VLU2	MDAR1	Probable monodehydroascorbate reductase, cytoplasmic isoform 3	U0	87.148	10743000
EIDDADKLVEAIKAK	2	Unmodified					_EIDDADKLVEAIKAK_							A0A178VLU2	MDAR1	Probable monodehydroascorbate reductase, cytoplasmic isoform 3	U50	105.14	20916000
FGAYWVQGGK	0	Unmodified					_FGAYWVQGGK_							A0A178VLU2	MDAR1	Probable monodehydroascorbate reductase, cytoplasmic isoform 3	U0	143.56	74787000
FGAYWVQGGK	0	Unmodified					_FGAYWVQGGK_							A0A178VLU2	MDAR1	Probable monodehydroascorbate reductase, cytoplasmic isoform 3	U50	125.01	57182000
GADSKNILYLR	1	Unmodified					_GADSKNILYLR_							A0A178VLU2	MDAR1	Probable monodehydroascorbate reductase, cytoplasmic isoform 3	U0	121.36	14967000
GADSKNILYLR	1	Unmodified					_GADSKNILYLR_							A0A178VLU2	MDAR1	Probable monodehydroascorbate reductase, cytoplasmic isoform 3	U50	166.86	27829000
GYLFPEGAAR	0	Unmodified					_GYLFPEGAAR_							A0A178VLU2	MDAR1	Probable monodehydroascorbate reductase, cytoplasmic isoform 3	U0	NaN	71401000
GYLFPEGAAR	0	Unmodified					_GYLFPEGAAR_							A0A178VLU2	MDAR1	Probable monodehydroascorbate reductase, cytoplasmic isoform 3	U50	130.27	124790000
LLPESYK	0	Unmodified					_LLPESYK_							A0A178VLU2	MDAR1	Probable monodehydroascorbate reductase, cytoplasmic isoform 3	U0	100.07	28178000
LLPESYK	0	Unmodified					_LLPESYK_							A0A178VLU2	MDAR1	Probable monodehydroascorbate reductase, cytoplasmic isoform 3	U50	NaN	33901000
LPGFHCCVGSGGEK	0	Unmodified					_LPGFHCCVGSGGEK_							A0A178VLU2	MDAR1	Probable monodehydroascorbate reductase, cytoplasmic isoform 3	U0	72.175	28543000
LPGFHCCVGSGGEK	0	Unmodified					_LPGFHCCVGSGGEK_							A0A178VLU2	MDAR1	Probable monodehydroascorbate reductase, cytoplasmic isoform 3	U50	91.307	60010000
LTDFGVKGADSK	1	Unmodified					_LTDFGVKGADSK_							A0A178VLU2	MDAR1	Probable monodehydroascorbate reductase, cytoplasmic isoform 3	U0	NaN	4602800
LTDFGVKGADSK	1	Unmodified					_LTDFGVKGADSK_							A0A178VLU2	MDAR1	Probable monodehydroascorbate reductase, cytoplasmic isoform 3	U50	103.2	38455000
LTDFGVKGADSKNILYLR	2	Unmodified					_LTDFGVKGADSKNILYLR_							A0A178VLU2	MDAR1	Probable monodehydroascorbate reductase, cytoplasmic isoform 3	U50	105.06	2963000
VVGAFMEGGSGDENK	0	Oxidation (M)				1	_VVGAFM(ox)EGGSGDENK_			VVGAFM(1)EGGSGDENK			VVGAFM(147.62)EGGSGDENK	A0A178VLU2	MDAR1	Probable monodehydroascorbate reductase, cytoplasmic isoform 3	U0	147.62	8454100
VVGAFMEGGSGDENK	0	Unmodified					_VVGAFMEGGSGDENK_							A0A178VLU2	MDAR1	Probable monodehydroascorbate reductase, cytoplasmic isoform 3	U0	196.88	36046000
VVGAFMEGGSGDENK	0	Oxidation (M)				1	_VVGAFM(ox)EGGSGDENK_			VVGAFM(1)EGGSGDENK			VVGAFM(158.08)EGGSGDENK	A0A178VLU2	MDAR1	Probable monodehydroascorbate reductase, cytoplasmic isoform 3	U50	158.08	7060500
VVGAFMEGGSGDENK	0	Unmodified					_VVGAFMEGGSGDENK_							A0A178VLU2	MDAR1	Probable monodehydroascorbate reductase, cytoplasmic isoform 3	U50	179.19	25617000
VVGAFMEGGSGDENKALAK	1	Unmodified					_VVGAFMEGGSGDENKALAK_							A0A178VLU2	MDAR1	Probable monodehydroascorbate reductase, cytoplasmic isoform 3	U0	130.27	52386000
VVGAFMEGGSGDENKALAK	1	Unmodified					_VVGAFMEGGSGDENKALAK_							A0A178VLU2	MDAR1	Probable monodehydroascorbate reductase, cytoplasmic isoform 3	U50	116.82	50208000
VVGAFMEGGSGDENKALAK	1	Oxidation (M)				1	_VVGAFM(ox)EGGSGDENKALAK_			VVGAFM(1)EGGSGDENKALAK			VVGAFM(87.16)EGGSGDENKALAK	A0A178VLU2	MDAR1	Probable monodehydroascorbate reductase, cytoplasmic isoform 3	U50	87.16	16242000
LSLDRLVYFTTCK	1	Unmodified					_LSLDRLVYFTTCK_							A0A178VMP3	CID4	Polyadenylate-binding protein-interacting protein 4	U0	76.358	19840000
LVYFTTCK	0	Unmodified					_LVYFTTCK_							A0A178VMP3	CID4	Polyadenylate-binding protein-interacting protein 4	U0	103.91	39869000
LVYFTTCK	0	Unmodified					_LVYFTTCK_							A0A178VMP3	CID4	Polyadenylate-binding protein-interacting protein 4	U50	NaN	46596000
MACLIKDGTLR	1	Unmodified					_MACLIKDGTLR_							A0A178VMP3	CID4	Polyadenylate-binding protein-interacting protein 4	U50	98.634	54981000
MACLIKDGTLR	1	Unmodified					_MACLIKDGTLR_							A0A178VMP3	CID4	Polyadenylate-binding protein-interacting protein 4	U50	104.89	11141000
MACLIKDGTLR	1	Oxidation (M)				1	_M(ox)ACLIKDGTLR_			M(1)ACLIKDGTLR			M(77.67)ACLIKDGTLR	A0A178VMP3	CID4	Polyadenylate-binding protein-interacting protein 4	U50	77.674
MACLIKDGTLRGHK	2	Unmodified					_MACLIKDGTLRGHK_							A0A178VMP3	CID4	Polyadenylate-binding protein-interacting protein 4	U0	41.092	2781400
MACLIKDGTLRGHK	2	Unmodified					_MACLIKDGTLRGHK_							A0A178VMP3	CID4	Polyadenylate-binding protein-interacting protein 4	U50	80.96	10509000
MACLIKDGTLRGHK	2	Unmodified					_MACLIKDGTLRGHK_							A0A178VMP3	CID4	Polyadenylate-binding protein-interacting protein 4	U50	127.56	4553600
ASVHPGGVFVHPSGTEK	0	Unmodified					_ASVHPGGVFVHPSGTEK_							A0A178VNN5	SPP2	Probable sucrose-phosphatase 2	U0	83.755	25751000
ASVHPGGVFVHPSGTEK	0	Unmodified					_ASVHPGGVFVHPSGTEK_							A0A178VNN5	SPP2	Probable sucrose-phosphatase 2	U0	120.59	11298000
ASVHPGGVFVHPSGTEK	0	Unmodified					_ASVHPGGVFVHPSGTEK_							A0A178VNN5	SPP2	Probable sucrose-phosphatase 2	U50	93.576	62576000
ASVHPGGVFVHPSGTEK	0	Unmodified					_ASVHPGGVFVHPSGTEK_							A0A178VNN5	SPP2	Probable sucrose-phosphatase 2	U50	89.039	28348000
RGEVENSEAYTASLK	1	Unmodified					_RGEVENSEAYTASLK_							A0A178VNN5	SPP2	Probable sucrose-phosphatase 2	U0	NaN	1544500
RGEVENSEAYTASLK	1	Unmodified					_RGEVENSEAYTASLK_							A0A178VNN5	SPP2	Probable sucrose-phosphatase 2	U50	115.8	5057300
SKAQEVTKELSQR	2	Unmodified					_SKAQEVTKELSQR_							A0A178VNN5	SPP2	Probable sucrose-phosphatase 2	U0	78.887	4702300
SKAQEVTKELSQR	2	Unmodified					_SKAQEVTKELSQR_							A0A178VNN5	SPP2	Probable sucrose-phosphatase 2	U50	100.11	4620500
SLRDTIDELR	1	Unmodified					_SLRDTIDELR_							A0A178VNN5	SPP2	Probable sucrose-phosphatase 2	U0	NaN	3141500
SLRDTIDELR	1	Unmodified					_SLRDTIDELR_							A0A178VNN5	SPP2	Probable sucrose-phosphatase 2	U50	64.86	6876600
LGPNLSPR	0	Unmodified					_LGPNLSPR_							A0A178VNN5	SPP2;SPP1	Probable sucrose-phosphatase 2;Probable sucrose-phosphatase 1	U0	NaN	3400300
LGPNLSPR	0	Unmodified					_LGPNLSPR_							A0A178VNN5	SPP2;SPP1	Probable sucrose-phosphatase 2;Probable sucrose-phosphatase 1	U50	117.18	17076000
EKAWFANSLR	1	Unmodified					_EKAWFANSLR_							A0A178VNX6	PPOX2	Pyridoxine/pyridoxamine 5-phosphate oxidase 2	U0	38.478	15958000
EKAWFANSLR	1	Unmodified					_EKAWFANSLR_							A0A178VNX6	PPOX2	Pyridoxine/pyridoxamine 5-phosphate oxidase 2	U50	NaN	7637900
IEVIDASNPDQTK	0	Unmodified					_IEVIDASNPDQTK_							A0A178VNX6	PPOX2	Pyridoxine/pyridoxamine 5-phosphate oxidase 2	U0	150.04	13537000
IEVIDASNPDQTKLQQR	1	Unmodified					_IEVIDASNPDQTKLQQR_							A0A178VNX6	PPOX2	Pyridoxine/pyridoxamine 5-phosphate oxidase 2	U0	149	11631000
IEVIDASNPDQTKLQQR	1	Unmodified					_IEVIDASNPDQTKLQQR_							A0A178VNX6	PPOX2	Pyridoxine/pyridoxamine 5-phosphate oxidase 2	U50	109.35	5487300
LIYVCPTPGSPCNSEQSSQQVK	0	Unmodified					_LIYVCPTPGSPCNSEQSSQQVK_							A0A178VNX6	PPOX2	Pyridoxine/pyridoxamine 5-phosphate oxidase 2	U0	100.46	4881900
LIYVCPTPGSPCNSEQSSQQVK	0	Unmodified					_LIYVCPTPGSPCNSEQSSQQVK_							A0A178VNX6	PPOX2	Pyridoxine/pyridoxamine 5-phosphate oxidase 2	U50	NaN	1858800
ALVTLIEK	0	Unmodified					_ALVTLIEK_							A0A178VP05	GSTF9	Glutathione S-transferase F9	U0	97.798	61452000
ALVTLIEK	0	Unmodified					_ALVTLIEK_							A0A178VP05	GSTF9	Glutathione S-transferase F9	U50	97.798	22866000
ESEEKLAGVLDVYEAHLSK	1	Unmodified					_ESEEKLAGVLDVYEAHLSK_							A0A178VP05	GSTF9	Glutathione S-transferase F9	U0	43.12	3935900
ESEEKLAGVLDVYEAHLSK	1	Unmodified					_ESEEKLAGVLDVYEAHLSK_							A0A178VP05	GSTF9	Glutathione S-transferase F9	U50	NaN	4927400
LAGVLDVYEAHLSK	0	Unmodified					_LAGVLDVYEAHLSK_							A0A178VP05	GSTF9	Glutathione S-transferase F9	U0	54.598	35514000
LAGVLDVYEAHLSK	0	Unmodified					_LAGVLDVYEAHLSK_							A0A178VP05	GSTF9	Glutathione S-transferase F9	U0	127.83	7235800
LAGVLDVYEAHLSK	0	Unmodified					_LAGVLDVYEAHLSK_							A0A178VP05	GSTF9	Glutathione S-transferase F9	U50	55.656	12578000
VLKVYGPHFASPK	1	Unmodified					_VLKVYGPHFASPK_							A0A178VP05	GSTF9	Glutathione S-transferase F9	U0	53.136	14472000
VLKVYGPHFASPK	1	Unmodified					_VLKVYGPHFASPK_							A0A178VP05	GSTF9	Glutathione S-transferase F9	U50	NaN	7799100
YRSQGPDLLGK	1	Unmodified					_YRSQGPDLLGK_							A0A178VP05	GSTF9;GSTF10	Glutathione S-transferase F9;Glutathione S-transferase F10	U0	96.604	20007000
YRSQGPDLLGK	1	Unmodified					_YRSQGPDLLGK_							A0A178VP05	GSTF9;GSTF10	Glutathione S-transferase F9;Glutathione S-transferase F10	U50	NaN	10277000
IQALAEGRPWNDPPVVK	1	Unmodified					_IQALAEGRPWNDPPVVK_							A0A178VP11	AGD6	Probable ADP-ribosylation factor GTPase-activating protein AGD6	U0	59.345	43556000
IQALAEGRPWNDPPVVK	1	Unmodified					_IQALAEGRPWNDPPVVK_							A0A178VP11	AGD6	Probable ADP-ribosylation factor GTPase-activating protein AGD6	U0	NaN	1967800
IQALAEGRPWNDPPVVK	1	Unmodified					_IQALAEGRPWNDPPVVK_							A0A178VP11	AGD6	Probable ADP-ribosylation factor GTPase-activating protein AGD6	U50	41.386	61767000
IQALAEGRPWNDPPVVK	1	Unmodified					_IQALAEGRPWNDPPVVK_							A0A178VP11	AGD6	Probable ADP-ribosylation factor GTPase-activating protein AGD6	U50	90.005	4146300
LNKFFAQYGIAK	1	Unmodified					_LNKFFAQYGIAK_							A0A178VP11	AGD6	Probable ADP-ribosylation factor GTPase-activating protein AGD6	U0	113.27	17695000
LNKFFAQYGIAK	1	Unmodified					_LNKFFAQYGIAK_							A0A178VP11	AGD6	Probable ADP-ribosylation factor GTPase-activating protein AGD6	U0	NaN	3182000
LNKFFAQYGIAK	1	Unmodified					_LNKFFAQYGIAK_							A0A178VP11	AGD6	Probable ADP-ribosylation factor GTPase-activating protein AGD6	U50	151.97	5304100
LNKFFAQYGIAK	1	Unmodified					_LNKFFAQYGIAK_							A0A178VP11	AGD6	Probable ADP-ribosylation factor GTPase-activating protein AGD6	U50	NaN	29368000
SVTMDSWSAIQIK	0	Oxidation (M)				1	_SVTM(ox)DSWSAIQIK_			SVTM(1)DSWSAIQIK			SVTM(98.94)DSWSAIQIK	A0A178VP11	AGD6	Probable ADP-ribosylation factor GTPase-activating protein AGD6	U0	98.943	4562200
SVTMDSWSAIQIK	0	Unmodified					_SVTMDSWSAIQIK_							A0A178VP11	AGD6	Probable ADP-ribosylation factor GTPase-activating protein AGD6	U0	NaN	7076200
SVTMDSWSAIQIK	0	Oxidation (M)				1	_SVTM(ox)DSWSAIQIK_			SVTM(1)DSWSAIQIK			SVTM(120.09)DSWSAIQIK	A0A178VP11	AGD6	Probable ADP-ribosylation factor GTPase-activating protein AGD6	U50	120.09	8349400
SVTMDSWSAIQIK	0	Unmodified					_SVTMDSWSAIQIK_							A0A178VP11	AGD6	Probable ADP-ribosylation factor GTPase-activating protein AGD6	U50	85.622	11464000
SVTMDSWSAIQIKK	1	Unmodified					_SVTMDSWSAIQIKK_							A0A178VP11	AGD6	Probable ADP-ribosylation factor GTPase-activating protein AGD6	U50	68.83	7004700
KLADLLVVAR	1	Unmodified					_KLADLLVVAR_							A0A178VPF1	AKR4C10	Aldo-keto reductase family 4 member C10	U0	126.31	5586100
KLADLLVVAR	1	Unmodified					_KLADLLVVAR_							A0A178VPF1	AKR4C10	Aldo-keto reductase family 4 member C10	U50	NaN	3627500
LADLLVVAR	0	Unmodified					_LADLLVVAR_							A0A178VPF1	AKR4C10	Aldo-keto reductase family 4 member C10	U0	163.67	10534000
LADLLVVAR	0	Unmodified					_LADLLVVAR_							A0A178VPF1	AKR4C10	Aldo-keto reductase family 4 member C10	U50	124.08	5269200
VPPAVNQVECHPSWQQNVLR	0	Unmodified					_VPPAVNQVECHPSWQQNVLR_							A0A178VPF1	AKR4C10	Aldo-keto reductase family 4 member C10	U0	73.758	3943300
AGEVSISEITGTTTK	0	Unmodified					_AGEVSISEITGTTTK_							A0A178VPL4	HSK	Homoserine kinase	U0	147.26	16316000
AGEVSISEITGTTTK	0	Unmodified					_AGEVSISEITGTTTK_							A0A178VPL4	HSK	Homoserine kinase	U50	160.62	26677000
KLGSDQLVLAGLESEAK	1	Unmodified					_KLGSDQLVLAGLESEAK_							A0A178VPL4	HSK	Homoserine kinase	U0	NaN	4400000
KLGSDQLVLAGLESEAK	1	Unmodified					_KLGSDQLVLAGLESEAK_							A0A178VPL4	HSK	Homoserine kinase	U50	65.274	6009400
LSTNPLR	0	Unmodified					_LSTNPLR_							A0A178VPL4	HSK	Homoserine kinase	U0	NaN	4524600
LSTNPLR	0	Unmodified					_LSTNPLR_							A0A178VPL4	HSK	Homoserine kinase	U50	98.415	8549200
MVELTNQR	0	Unmodified					_MVELTNQR_							A0A178VRA7	MORF6	Multiple organellar RNA editing factor 6, mitochondrial	U0	174.21	125290000
MVELTNQR	0	Unmodified					_MVELTNQR_							A0A178VRA7	MORF6	Multiple organellar RNA editing factor 6, mitochondrial	U50	174.21	152780000
MVELTNQR	0	Oxidation (M)				1	_M(ox)VELTNQR_			M(1)VELTNQR			M(70.69)VELTNQR	A0A178VRA7	MORF6	Multiple organellar RNA editing factor 6, mitochondrial	U50	70.69
RMVELTNQR	1	Unmodified					_RMVELTNQR_							A0A178VRA7	MORF6	Multiple organellar RNA editing factor 6, mitochondrial	U0	144.77	11024000
RMVELTNQR	1	Unmodified					_RMVELTNQR_							A0A178VRA7	MORF6	Multiple organellar RNA editing factor 6, mitochondrial	U50	209.86	13544000
KKIYNVSCER	2	Unmodified					_KKIYNVSCER_							A0A178VRA7	MORF6;MORF5	Multiple organellar RNA editing factor 6, mitochondrial;Multiple organellar RNA editing factor 5, mitochondrial	U0	64.73	780330
KKIYNVSCER	2	Unmodified					_KKIYNVSCER_							A0A178VRA7	MORF6;MORF5	Multiple organellar RNA editing factor 6, mitochondrial;Multiple organellar RNA editing factor 5, mitochondrial	U50	NaN	571180
QQMIDCYVQTLAK	0	Oxidation (M)				1	_QQM(ox)IDCYVQTLAK_			QQM(1)IDCYVQTLAK			QQM(132.76)IDCYVQTLAK	A0A178VRA7	MORF6;MORF5	Multiple organellar RNA editing factor 6, mitochondrial;Multiple organellar RNA editing factor 5, mitochondrial	U0	132.76	90193000
QQMIDCYVQTLAK	0	Oxidation (M)				1	_QQM(ox)IDCYVQTLAK_			QQM(1)IDCYVQTLAK			QQM(89.44)IDCYVQTLAK	A0A178VRA7	MORF6;MORF5	Multiple organellar RNA editing factor 6, mitochondrial;Multiple organellar RNA editing factor 5, mitochondrial	U0	89.44	11153000
QQMIDCYVQTLAK	0	Unmodified					_QQMIDCYVQTLAK_							A0A178VRA7	MORF6;MORF5	Multiple organellar RNA editing factor 6, mitochondrial;Multiple organellar RNA editing factor 5, mitochondrial	U0	158.94	161440000
QQMIDCYVQTLAK	0	Unmodified					_QQMIDCYVQTLAK_							A0A178VRA7	MORF6;MORF5	Multiple organellar RNA editing factor 6, mitochondrial;Multiple organellar RNA editing factor 5, mitochondrial	U0	172.76	13934000
QQMIDCYVQTLAK	0	Oxidation (M)				1	_QQM(ox)IDCYVQTLAK_			QQM(1)IDCYVQTLAK			QQM(138.76)IDCYVQTLAK	A0A178VRA7	MORF6;MORF5	Multiple organellar RNA editing factor 6, mitochondrial;Multiple organellar RNA editing factor 5, mitochondrial	U50	138.76	90166000
QQMIDCYVQTLAK	0	Oxidation (M)				1	_QQM(ox)IDCYVQTLAK_			QQM(1)IDCYVQTLAK			QQM(113.07)IDCYVQTLAK	A0A178VRA7	MORF6;MORF5	Multiple organellar RNA editing factor 6, mitochondrial;Multiple organellar RNA editing factor 5, mitochondrial	U50	113.07	12526000
QQMIDCYVQTLAK	0	Unmodified					_QQMIDCYVQTLAK_							A0A178VRA7	MORF6;MORF5	Multiple organellar RNA editing factor 6, mitochondrial;Multiple organellar RNA editing factor 5, mitochondrial	U50	175.49	130160000
QQMIDCYVQTLAK	0	Unmodified					_QQMIDCYVQTLAK_							A0A178VRA7	MORF6;MORF5	Multiple organellar RNA editing factor 6, mitochondrial;Multiple organellar RNA editing factor 5, mitochondrial	U50	126.34	11859000
YFGFGCEIDEETSNK	0	Unmodified					_YFGFGCEIDEETSNK_							A0A178VRA7	MORF6;MORF5	Multiple organellar RNA editing factor 6, mitochondrial;Multiple organellar RNA editing factor 5, mitochondrial	U0	158.31	5569300
YFGFGCEIDEETSNK	0	Unmodified					_YFGFGCEIDEETSNK_							A0A178VRA7	MORF6;MORF5	Multiple organellar RNA editing factor 6, mitochondrial;Multiple organellar RNA editing factor 5, mitochondrial	U50	120.96	2332900
IYNVSCER	0	Unmodified					_IYNVSCER_							A0A178VRA7	MORF6;MORF5;MORF2	Multiple organellar RNA editing factor 6, mitochondrial;Multiple organellar RNA editing factor 5, mitochondrial;Multiple organellar RNA editing factor 2, chloroplastic	U0	172.03	367010000
IYNVSCER	0	Methyl (KR)			1		_IYNVSCER(me)_		IYNVSCER(1)			IYNVSCER(146.21)		A0A178VRA7	MORF6;MORF5;MORF2	Multiple organellar RNA editing factor 6, mitochondrial;Multiple organellar RNA editing factor 5, mitochondrial;Multiple organellar RNA editing factor 2, chloroplastic	U0	146.21	11346000
IYNVSCER	0	Unmodified					_IYNVSCER_							A0A178VRA7	MORF6;MORF5;MORF2	Multiple organellar RNA editing factor 6, mitochondrial;Multiple organellar RNA editing factor 5, mitochondrial;Multiple organellar RNA editing factor 2, chloroplastic	U50	161.6	636200000
IYNVSCER	0	Methyl (KR)			1		_IYNVSCER(me)_		IYNVSCER(1)			IYNVSCER(146.94)		A0A178VRA7	MORF6;MORF5;MORF2	Multiple organellar RNA editing factor 6, mitochondrial;Multiple organellar RNA editing factor 5, mitochondrial;Multiple organellar RNA editing factor 2, chloroplastic	U50	146.94	13418000
CKEYLTFSNTIK	1	Unmodified					_CKEYLTFSNTIK_							A0A178VRV3	SAP11	Zinc finger AN1 and C2H2 domain-containing stress-associated protein 11	U50	83.573	10012000
CLQVFCLDHR	0	Unmodified					_CLQVFCLDHR_							A0A178VRV3	SAP11	Zinc finger AN1 and C2H2 domain-containing stress-associated protein 11	U0	48.785	3980600
CLQVFCLDHR	0	Unmodified					_CLQVFCLDHR_							A0A178VRV3	SAP11	Zinc finger AN1 and C2H2 domain-containing stress-associated protein 11	U50	87.485	17395000
CLQVFCLDHR	0	Unmodified					_CLQVFCLDHR_							A0A178VRV3	SAP11	Zinc finger AN1 and C2H2 domain-containing stress-associated protein 11	U50	125.82	4725000
FGPDHTCPGPR	0	Unmodified					_FGPDHTCPGPR_							A0A178VRV3	SAP11	Zinc finger AN1 and C2H2 domain-containing stress-associated protein 11	U0	103.31	2685500
FGPDHTCPGPR	0	Unmodified					_FGPDHTCPGPR_							A0A178VRV3	SAP11	Zinc finger AN1 and C2H2 domain-containing stress-associated protein 11	U50	125.74	19661000
FGPDHTCPGPR	0	Unmodified					_FGPDHTCPGPR_							A0A178VRV3	SAP11	Zinc finger AN1 and C2H2 domain-containing stress-associated protein 11	U50	107.56	1360500
GTPEFPDLGKHCSVDVCK	1	Acetyl (Protein N-term)	1				_(ac)GTPEFPDLGKHCSVDVCK_							A0A178VRV3	SAP11	Zinc finger AN1 and C2H2 domain-containing stress-associated protein 11	U0	NaN	3517800
GTPEFPDLGKHCSVDVCK	1	Acetyl (Protein N-term)	1				_(ac)GTPEFPDLGKHCSVDVCK_							A0A178VRV3	SAP11	Zinc finger AN1 and C2H2 domain-containing stress-associated protein 11	U50	96.544	10689000
AKEQQMQIQQLQMMR	1	Unmodified					_AKEQQMQIQQLQMMR_							A0A178VS21	LUH		U0	NaN	2508900
AKEQQMQIQQLQMMR	1	Unmodified					_AKEQQMQIQQLQMMR_							A0A178VS21	LUH		U50	119.62	6266600
TNEKHSEAAAAYIEAQQGK	1	Unmodified					_TNEKHSEAAAAYIEAQQGK_							A0A178VS21	LUH		U0	NaN	3968400
TNEKHSEAAAAYIEAQQGK	1	Unmodified					_TNEKHSEAAAAYIEAQQGK_							A0A178VS21	LUH		U50	62.589	12818000
QQMIDCYIQTLAK	0	Oxidation (M)				1	_QQM(ox)IDCYIQTLAK_			QQM(1)IDCYIQTLAK			QQM(167.12)IDCYIQTLAK	A0A178VS42	MORF2	Multiple organellar RNA editing factor 2, chloroplastic	U0	167.12	21288000
QQMIDCYIQTLAK	0	Unmodified					_QQMIDCYIQTLAK_							A0A178VS42	MORF2	Multiple organellar RNA editing factor 2, chloroplastic	U0	139.15	35501000
QQMIDCYIQTLAK	0	Oxidation (M)				1	_QQM(ox)IDCYIQTLAK_			QQM(1)IDCYIQTLAK			QQM(150.04)IDCYIQTLAK	A0A178VS42	MORF2	Multiple organellar RNA editing factor 2, chloroplastic	U50	150.04	53744000
QQMIDCYIQTLAK	0	Unmodified					_QQMIDCYIQTLAK_							A0A178VS42	MORF2	Multiple organellar RNA editing factor 2, chloroplastic	U50	82.029	2304400
YLGFGCEIDEETSTK	0	Unmodified					_YLGFGCEIDEETSTK_							A0A178VS42	MORF2	Multiple organellar RNA editing factor 2, chloroplastic	U0	165.66	9526900
YLGFGCEIDEETSTK	0	Unmodified					_YLGFGCEIDEETSTK_							A0A178VS42	MORF2	Multiple organellar RNA editing factor 2, chloroplastic	U50	191.52	12111000
FNAGTNKAASSGTSLNTK	1	Unmodified					_FNAGTNKAASSGTSLNTK_							A0A178VSD5	MBF1A	Multiprotein-bridging factor 1a	U0	143.46	7798400
FNAGTNKAASSGTSLNTK	1	Unmodified					_FNAGTNKAASSGTSLNTK_							A0A178VSD5	MBF1A	Multiprotein-bridging factor 1a	U50	36.207	2148100
KFNAGTNKAASSGTSLNTK	2	Unmodified					_KFNAGTNKAASSGTSLNTK_							A0A178VSD5	MBF1A	Multiprotein-bridging factor 1a	U0	46.46	8165900
KFNAGTNKAASSGTSLNTK	2	Unmodified					_KFNAGTNKAASSGTSLNTK_							A0A178VSD5	MBF1A	Multiprotein-bridging factor 1a	U0	NaN	8458800
KFNAGTNKAASSGTSLNTK	2	Unmodified					_KFNAGTNKAASSGTSLNTK_							A0A178VSD5	MBF1A	Multiprotein-bridging factor 1a	U50	111.82	3028000
MLDDDTENLTHER	0	Oxidation (M)				1	_M(ox)LDDDTENLTHER_			M(1)LDDDTENLTHER			M(100.22)LDDDTENLTHER	A0A178VSD5	MBF1A	Multiprotein-bridging factor 1a	U0	100.22	12202000
MLDDDTENLTHER	0	Unmodified					_MLDDDTENLTHER_							A0A178VSD5	MBF1A	Multiprotein-bridging factor 1a	U0	165.58	30597000
MLDDDTENLTHER	0	Oxidation (M)				1	_M(ox)LDDDTENLTHER_							A0A178VSD5	MBF1A	Multiprotein-bridging factor 1a	U50	NaN	1974000
MLDDDTENLTHER	0	Unmodified					_MLDDDTENLTHER_							A0A178VSD5	MBF1A	Multiprotein-bridging factor 1a	U50	NaN	5367600
MLDDDTENLTHERVPTELKK	2	Oxidation (M)				1	_M(ox)LDDDTENLTHERVPTELKK_			M(1)LDDDTENLTHERVPTELKK			M(54.66)LDDDTENLTHERVPTELKK	A0A178VSD5	MBF1A	Multiprotein-bridging factor 1a	U0	54.658	44650000
MLDDDTENLTHERVPTELKK	2	Oxidation (M)				1	_M(ox)LDDDTENLTHERVPTELKK_			M(1)LDDDTENLTHERVPTELKK			M(81.72)LDDDTENLTHERVPTELKK	A0A178VSD5	MBF1A	Multiprotein-bridging factor 1a	U0	81.723	31612000
MLDDDTENLTHERVPTELKK	2	Unmodified					_MLDDDTENLTHERVPTELKK_							A0A178VSD5	MBF1A	Multiprotein-bridging factor 1a	U0	143.46	48740000
MLDDDTENLTHERVPTELKK	2	Unmodified					_MLDDDTENLTHERVPTELKK_							A0A178VSD5	MBF1A	Multiprotein-bridging factor 1a	U50	61.757	11308000
AIPNQQILSK	0	Unmodified					_AIPNQQILSK_							A0A178VSD5	MBF1B;MBF1A	Multiprotein-bridging factor 1b;Multiprotein-bridging factor 1a	U0	114.99	48002000
AIPNQQILSK	0	Unmodified					_AIPNQQILSK_							A0A178VSD5	MBF1B;MBF1A	Multiprotein-bridging factor 1b;Multiprotein-bridging factor 1a	U50	93.267	7540200
AIPNQQILSKLER	1	Unmodified					_AIPNQQILSKLER_							A0A178VSD5	MBF1B;MBF1A	Multiprotein-bridging factor 1b;Multiprotein-bridging factor 1a	U0	134.98	58768000
AIPNQQILSKLER	1	Unmodified					_AIPNQQILSKLER_							A0A178VSD5	MBF1B;MBF1A	Multiprotein-bridging factor 1b;Multiprotein-bridging factor 1a	U0	116.77	7823100
AIPNQQILSKLER	1	Unmodified					_AIPNQQILSKLER_							A0A178VSD5	MBF1B;MBF1A	Multiprotein-bridging factor 1b;Multiprotein-bridging factor 1a	U50	96.756	9647800
AIPNQQILSKLER	1	Unmodified					_AIPNQQILSKLER_							A0A178VSD5	MBF1B;MBF1A	Multiprotein-bridging factor 1b;Multiprotein-bridging factor 1a	U50	NaN	1278500
YMVIQGEQGAVIR	0	Unmodified					_YMVIQGEQGAVIR_							A0A178VSE7	PRO1	Profilin-1	U0	157.96	4783000
YMVIQGEQGAVIR	0	Unmodified					_YMVIQGEQGAVIR_							A0A178VSE7	PRO1	Profilin-1	U50	85.533
YMVIQGEQGAVIR	0	Unmodified					_YMVIQGEQGAVIR_							A0A178VSE7	PRO1	Profilin-1	U50	NaN	3919400
GSGFVAFSAASEASR	0	Unmodified					_GSGFVAFSAASEASR_							A0A178VSF7	PAB4	Polyadenylate-binding protein 4	U0	114.71	3959900
MVGGKPLYVALAQR	1	Unmodified					_MVGGKPLYVALAQR_							A0A178VSF7	PAB4	Polyadenylate-binding protein 4	U0	54.524	5160300
MVGGKPLYVALAQR	1	Unmodified					_MVGGKPLYVALAQR_							A0A178VSF7	PAB4	Polyadenylate-binding protein 4	U50	NaN	874880
RYEQGSSDGGNKFDGLNLYVK	2	Unmodified					_RYEQGSSDGGNKFDGLNLYVK_							A0A178VSF7	PAB4	Polyadenylate-binding protein 4	U0	91.276	3349000
RYEQGSSDGGNKFDGLNLYVK	2	Unmodified					_RYEQGSSDGGNKFDGLNLYVK_							A0A178VSF7	PAB4	Polyadenylate-binding protein 4	U50	NaN	2581300
SGVGNLFVK	0	Unmodified					_SGVGNLFVK_							A0A178VSF7	PAB4	Polyadenylate-binding protein 4	U0	82.529	11658000
SGVGNLFVK	0	Unmodified					_SGVGNLFVK_							A0A178VSF7	PAB4	Polyadenylate-binding protein 4	U50	NaN	6156800
GVDELEK	0	Dimethyl (KR)		1			_GVDELEK(di)_							A0A178VSH4	At2g07170		U0	NaN	3085200
GVDELEK	0	Dimethyl (KR)		1			_GVDELEK(di)_	GVDELEK(1)			GVDELEK(77.75)			A0A178VSH4	At2g07170		U50	77.748	10782000
GIETKLPEVVNCSAR	1	Unmodified					_GIETKLPEVVNCSAR_							A0A178VSZ7	FPA	Flowering time control protein FPA	U50	105.19	7927300
DFQGLVPVTVK	0	Unmodified					_DFQGLVPVTVK_							A0A178VTA7	RPA2A	Replication protein A 32 kDa subunit A	U50	93.258	26521000
EMESVRDGTYVR	1	Unmodified					_EMESVRDGTYVR_							A0A178VTA7	RPA2A	Replication protein A 32 kDa subunit A	U0	NaN	6053400
EMESVRDGTYVR	1	Oxidation (M)				1	_EM(ox)ESVRDGTYVR_			EM(1)ESVRDGTYVR			EM(106.49)ESVRDGTYVR	A0A178VTA7	RPA2A	Replication protein A 32 kDa subunit A	U50	106.49	3685700
EMESVRDGTYVR	1	Unmodified					_EMESVRDGTYVR_							A0A178VTA7	RPA2A	Replication protein A 32 kDa subunit A	U50	140.24	29122000
EMESVRDGTYVR	1	Unmodified					_EMESVRDGTYVR_							A0A178VTA7	RPA2A	Replication protein A 32 kDa subunit A	U50	146.11	3758800
FTLDDGTGR	0	Unmodified					_FTLDDGTGR_							A0A178VTA7	RPA2A	Replication protein A 32 kDa subunit A	U0	NaN	4008500
FTLDDGTGR	0	Unmodified					_FTLDDGTGR_							A0A178VTA7	RPA2A	Replication protein A 32 kDa subunit A	U50	99.755	15466000
FTLDDGTGRIDCK	1	Unmodified					_FTLDDGTGRIDCK_							A0A178VTA7	RPA2A	Replication protein A 32 kDa subunit A	U50	49.724	15250000
FTLDDGTGRIDCKR	2	Unmodified					_FTLDDGTGRIDCKR_							A0A178VTA7	RPA2A	Replication protein A 32 kDa subunit A	U0	58.831	4589600
FTLDDGTGRIDCKR	2	Unmodified					_FTLDDGTGRIDCKR_							A0A178VTA7	RPA2A	Replication protein A 32 kDa subunit A	U50	113.76	33640000
FTLDDGTGRIDCKR	2	Unmodified					_FTLDDGTGRIDCKR_							A0A178VTA7	RPA2A	Replication protein A 32 kDa subunit A	U50	126.95	17356000
NRDFQGLVPVTVK	1	Unmodified					_NRDFQGLVPVTVK_							A0A178VTA7	RPA2A	Replication protein A 32 kDa subunit A	U0	NaN	1510200
NRDFQGLVPVTVK	1	Unmodified					_NRDFQGLVPVTVK_							A0A178VTA7	RPA2A	Replication protein A 32 kDa subunit A	U0	NaN	7270200
NRDFQGLVPVTVK	1	Unmodified					_NRDFQGLVPVTVK_							A0A178VTA7	RPA2A	Replication protein A 32 kDa subunit A	U50	83.351	41811000
NRDFQGLVPVTVK	1	Unmodified					_NRDFQGLVPVTVK_							A0A178VTA7	RPA2A	Replication protein A 32 kDa subunit A	U50	140.01	8749700
QITECFQSSGEK	0	Unmodified					_QITECFQSSGEK_							A0A178VTA7	RPA2A	Replication protein A 32 kDa subunit A	U0	111.61	5120900
QITECFQSSGEK	0	Unmodified					_QITECFQSSGEK_							A0A178VTA7	RPA2A	Replication protein A 32 kDa subunit A	U50	250.92	21092000
AALESDTRVLAYEAGR	1	Unmodified					_AALESDTRVLAYEAGR_							A0A178VTH6	MOD1	Enoyl-[acyl-carrier-protein] reductase [NADH], chloroplastic	U0	NaN	6423600
AALESDTRVLAYEAGR	1	Unmodified					_AALESDTRVLAYEAGR_							A0A178VTH6	MOD1	Enoyl-[acyl-carrier-protein] reductase [NADH], chloroplastic	U50	105.39	9164600
IIPGYGGGMSSAK	0	Unmodified					_IIPGYGGGMSSAK_							A0A178VTH6	MOD1	Enoyl-[acyl-carrier-protein] reductase [NADH], chloroplastic	U0	86.879	26425000
IIPGYGGGMSSAK	0	Unmodified					_IIPGYGGGMSSAK_							A0A178VTH6	MOD1	Enoyl-[acyl-carrier-protein] reductase [NADH], chloroplastic	U50	103.31	30684000
KSNIRVNTISAGPLGSR	2	Unmodified					_KSNIRVNTISAGPLGSR_							A0A178VTH6	MOD1	Enoyl-[acyl-carrier-protein] reductase [NADH], chloroplastic	U0	NaN	4812400
KSNIRVNTISAGPLGSR	2	Unmodified					_KSNIRVNTISAGPLGSR_							A0A178VTH6	MOD1	Enoyl-[acyl-carrier-protein] reductase [NADH], chloroplastic	U50	26.412	5931400
SNIRVNTISAGPLGSR	1	Unmodified					_SNIRVNTISAGPLGSR_							A0A178VTH6	MOD1	Enoyl-[acyl-carrier-protein] reductase [NADH], chloroplastic	U0	NaN	4371300
SNIRVNTISAGPLGSR	1	Unmodified					_SNIRVNTISAGPLGSR_							A0A178VTH6	MOD1	Enoyl-[acyl-carrier-protein] reductase [NADH], chloroplastic	U50	69.737	6423900
LIQDSKDEPAKLATK	2	Unmodified					_LIQDSKDEPAKLATK_							A0A178VTN0	SYD	Chromatin structure-remodeling complex protein SYD	U50	82.578	5960600
TSGKENTMPYQVISR	1	Unmodified					_TSGKENTMPYQVISR_							A0A178VTN0	SYD	Chromatin structure-remodeling complex protein SYD	U50	43.042	5270600
SKFPLNQSSEGTSGGGSPNSTK	1	Unmodified					_SKFPLNQSSEGTSGGGSPNSTK_							A0A178VTP6	MAP70-3;MAP70.3	Microtubule-associated protein 70-3	U0	110.91	8326200
CYECGESGHFAR	0	Unmodified					_CYECGESGHFAR_							A0A178VTR9	RSZ22A	Serine/arginine-rich splicing factor RSZ22A	U0	110.52	6661100
CYECGESGHFAR	0	Unmodified					_CYECGESGHFAR_							A0A178VTR9	RSZ22A	Serine/arginine-rich splicing factor RSZ22A	U50	NaN	588420
ALCADHSIKLLTVPSAK	1	Unmodified					_ALCADHSIKLLTVPSAK_							A0A178VU31	RPS12C	40S ribosomal protein S12-2	U0	69.148	46561000
ALCADHSIKLLTVPSAK	1	Unmodified					_ALCADHSIKLLTVPSAK_							A0A178VU31	RPS12C	40S ribosomal protein S12-2	U0	142.94	23570000
ALCADHSIKLLTVPSAK	1	Unmodified					_ALCADHSIKLLTVPSAK_							A0A178VU31	RPS12C	40S ribosomal protein S12-2	U50	118.5	19575000
ALCADHSIKLLTVPSAK	1	Unmodified					_ALCADHSIKLLTVPSAK_							A0A178VU31	RPS12C	40S ribosomal protein S12-2	U50	NaN	36760000
AYGGVVRGLHESAK	1	Unmodified					_AYGGVVRGLHESAK_							A0A178VU31	RPS12C	40S ribosomal protein S12-2	U50	65.472	3185200
GLHESAKLIEK	1	Unmodified					_GLHESAKLIEK_							A0A178VU31	RPS12C	40S ribosomal protein S12-2	U0	68.548	2388900
GLHESAKLIEK	1	Unmodified					_GLHESAKLIEK_							A0A178VU31	RPS12C	40S ribosomal protein S12-2	U50	NaN	1711500
KVVGCSCLVIK	1	Unmodified					_KVVGCSCLVIK_							A0A178VU31	RPS12C	40S ribosomal protein S12-2	U0	35.594	3460500
NAQLCVLAEDCNQPDYVK	0	Unmodified					_NAQLCVLAEDCNQPDYVK_							A0A178VU31	RPS12C	40S ribosomal protein S12-2	U0	226.42	28883000
NAQLCVLAEDCNQPDYVK	0	Unmodified					_NAQLCVLAEDCNQPDYVK_							A0A178VU31	RPS12C	40S ribosomal protein S12-2	U0	158.17	53451000
NAQLCVLAEDCNQPDYVK	0	Unmodified					_NAQLCVLAEDCNQPDYVK_							A0A178VU31	RPS12C	40S ribosomal protein S12-2	U50	91.858	4563700
NAQLCVLAEDCNQPDYVKLVK	1	Unmodified					_NAQLCVLAEDCNQPDYVKLVK_							A0A178VU31	RPS12C	40S ribosomal protein S12-2	U0	110.64	14675000
NAQLCVLAEDCNQPDYVKLVK	1	Unmodified					_NAQLCVLAEDCNQPDYVKLVK_							A0A178VU31	RPS12C	40S ribosomal protein S12-2	U50	NaN	2257100
LLTVPSAK	0	Unmodified					_LLTVPSAK_							A0A178VU31	RPS12C;RPS12A	40S ribosomal protein S12-2;40S ribosomal protein S12-1	U50	130.04	184510000
TLGEWAGLCK	0	Unmodified					_TLGEWAGLCK_							A0A178VU31	RPS12C;RPS12A	40S ribosomal protein S12-2;40S ribosomal protein S12-1	U0	112.84	151950000
TLGEWAGLCK	0	Unmodified					_TLGEWAGLCK_							A0A178VU31	RPS12C;RPS12A	40S ribosomal protein S12-2;40S ribosomal protein S12-1	U50	112.84	64213000
TLGEWAGLCKIDSEGNAR	1	Unmodified					_TLGEWAGLCKIDSEGNAR_							A0A178VU31	RPS12C;RPS12A	40S ribosomal protein S12-2;40S ribosomal protein S12-1	U0	147.92	49504000
TLGEWAGLCKIDSEGNAR	1	Unmodified					_TLGEWAGLCKIDSEGNAR_							A0A178VU31	RPS12C;RPS12A	40S ribosomal protein S12-2;40S ribosomal protein S12-1	U0	185.32	3821900
TLGEWAGLCKIDSEGNAR	1	Unmodified					_TLGEWAGLCKIDSEGNAR_							A0A178VU31	RPS12C;RPS12A	40S ribosomal protein S12-2;40S ribosomal protein S12-1	U50	116.82	21203000
TLGEWAGLCKIDSEGNARK	2	Unmodified					_TLGEWAGLCKIDSEGNARK_							A0A178VU31	RPS12C;RPS12A	40S ribosomal protein S12-2;40S ribosomal protein S12-1	U0	58.997	3968100
IKHDIDTETQDIPDAR	1	Unmodified					_IKHDIDTETQDIPDAR_							A0A178VU53	MGP1	Probable ATP synthase 24 kDa subunit, mitochondrial	U50	48.053	3284800
QFSDMIQPIEER	0	Unmodified					_QFSDMIQPIEER_							A0A178VUE8	COAD	Phosphopantetheine adenylyltransferase	U0	122.69	5127400
DGESPPQGGKPGWAALPSTR	1	Unmodified					_DGESPPQGGKPGWAALPSTR_							A0A178VUT8	GEK1	D-aminoacyl-tRNA deacylase	U0	56.748	6835700
DGESPPQGGKPGWAALPSTR	1	Unmodified					_DGESPPQGGKPGWAALPSTR_							A0A178VUT8	GEK1	D-aminoacyl-tRNA deacylase	U50	NaN	3015000
TTPGENYIGGNWR	0	Unmodified					_TTPGENYIGGNWR_							A0A178VUT8	GEK1	D-aminoacyl-tRNA deacylase	U0	169.09	6215500
TTPGENYIGGNWR	0	Unmodified					_TTPGENYIGGNWR_							A0A178VUT8	GEK1	D-aminoacyl-tRNA deacylase	U50	108.26	3944900
VLLGIGGGHYAPR	0	Unmodified					_VLLGIGGGHYAPR_							A0A178VUT8	GEK1	D-aminoacyl-tRNA deacylase	U0	63.727	12325000
VLLGIGGGHYAPR	0	Unmodified					_VLLGIGGGHYAPR_							A0A178VUT8	GEK1	D-aminoacyl-tRNA deacylase	U50	68.44	10811000
FSTLPNAK	0	Unmodified					_FSTLPNAK_							A0A178VV10	HOL3	Probable thiol methyltransferase 2	U0	116.3	13113000
FSTLPNAK	0	Unmodified					_FSTLPNAK_							A0A178VV10	HOL3	Probable thiol methyltransferase 2	U50	122.5	12286000
HVVGLDISK	0	Unmodified					_HVVGLDISK_							A0A178VV10	HOL3	Probable thiol methyltransferase 2	U0	156.51	7571500
HVVGLDISK	0	Unmodified					_HVVGLDISK_							A0A178VV10	HOL3	Probable thiol methyltransferase 2	U50	124.08	4623000
SGGPPYEVSVSEYEK	0	Unmodified					_SGGPPYEVSVSEYEK_							A0A178VV10	HOL3	Probable thiol methyltransferase 2	U0	160.86	8254100
SGGPPYEVSVSEYEK	0	Unmodified					_SGGPPYEVSVSEYEK_							A0A178VV10	HOL3	Probable thiol methyltransferase 2	U50	190.36	5959400
AAAEPEEADGPPQDPKR	1	Unmodified					_AAAEPEEADGPPQDPKR_							A0A178VV29	SAP3	Zinc finger A20 and AN1 domain-containing stress-associated protein 3	U50	118.2	5954200
ELVAQSSDVPANQQR	0	Unmodified					_ELVAQSSDVPANQQR_							A0A178VV70	DSK2B	Ubiquitin domain-containing protein DSK2b	U0	147.91	3780200
ELVAQSSDVPANQQR	0	Unmodified					_ELVAQSSDVPANQQR_							A0A178VV70	DSK2B	Ubiquitin domain-containing protein DSK2b	U50	292.33	10371000
GGEGDSSQPQSGEGEAVAVNIR	0	Unmodified					_GGEGDSSQPQSGEGEAVAVNIR_							A0A178VV70	DSK2B	Ubiquitin domain-containing protein DSK2b	U0	165.03	17634000
GGEGDSSQPQSGEGEAVAVNIR	0	Unmodified					_GGEGDSSQPQSGEGEAVAVNIR_							A0A178VV70	DSK2B	Ubiquitin domain-containing protein DSK2b	U0	218.4	9163100
GGEGDSSQPQSGEGEAVAVNIR	0	Unmodified					_GGEGDSSQPQSGEGEAVAVNIR_							A0A178VV70	DSK2B	Ubiquitin domain-containing protein DSK2b	U50	240.04	25632000
GGEGDSSQPQSGEGEAVAVNIR	0	Unmodified					_GGEGDSSQPQSGEGEAVAVNIR_							A0A178VV70	DSK2B	Ubiquitin domain-containing protein DSK2b	U50	250.64	38884000
GSAPSSAPPPAPAASQTTAPSVTR	0	Unmodified					_GSAPSSAPPPAPAASQTTAPSVTR_							A0A178VV70	DSK2B	Ubiquitin domain-containing protein DSK2b	U0	173.54	45362000
GSAPSSAPPPAPAASQTTAPSVTR	0	Unmodified					_GSAPSSAPPPAPAASQTTAPSVTR_							A0A178VV70	DSK2B	Ubiquitin domain-containing protein DSK2b	U0	NaN	10225000
GSAPSSAPPPAPAASQTTAPSVTR	0	Unmodified					_GSAPSSAPPPAPAASQTTAPSVTR_							A0A178VV70	DSK2B	Ubiquitin domain-containing protein DSK2b	U50	161.64	79032000
GSAPSSAPPPAPAASQTTAPSVTR	0	Unmodified					_GSAPSSAPPPAPAASQTTAPSVTR_							A0A178VV70	DSK2B	Ubiquitin domain-containing protein DSK2b	U50	166.59	24492000
ILKDDQTLLSYGLQADHTIHMVR	1	Unmodified					_ILKDDQTLLSYGLQADHTIHMVR_							A0A178VV70	DSK2B	Ubiquitin domain-containing protein DSK2b	U0	NaN	1618800
ILKDDQTLLSYGLQADHTIHMVR	1	Unmodified					_ILKDDQTLLSYGLQADHTIHMVR_							A0A178VV70	DSK2B	Ubiquitin domain-containing protein DSK2b	U50	143.93	12708000
ILKDDQTLLSYGLQADHTIHMVR	1	Unmodified					_ILKDDQTLLSYGLQADHTIHMVR_							A0A178VV70	DSK2B	Ubiquitin domain-containing protein DSK2b	U50	112.36	13385000
TSLDSTVESFK	0	Unmodified					_TSLDSTVESFK_							A0A178VV70	DSK2B	Ubiquitin domain-containing protein DSK2b	U50	66.683	14380000
TSLDSTVESFKELVAQSSDVPANQQR	1	Unmodified					_TSLDSTVESFKELVAQSSDVPANQQR_							A0A178VV70	DSK2B	Ubiquitin domain-containing protein DSK2b	U0	NaN	5935000
TSLDSTVESFKELVAQSSDVPANQQR	1	Unmodified					_TSLDSTVESFKELVAQSSDVPANQQR_							A0A178VV70	DSK2B	Ubiquitin domain-containing protein DSK2b	U50	82.936	29768000
HTGPGILSMANAGANTNGSQFFICTEK	0	Oxidation (M)				1	_HTGPGILSM(ox)ANAGANTNGSQFFICTEK_			HTGPGILSM(1)ANAGANTNGSQFFICTEK			HTGPGILSM(135.69)ANAGANTNGSQFFICTEK	A0A178VVJ7	CYP19-1	Peptidyl-prolyl cis-trans isomerase CYP19-1	U0	135.69	6516300
HTGPGILSMANAGANTNGSQFFICTEK	0	Oxidation (M)				1	_HTGPGILSM(ox)ANAGANTNGSQFFICTEK_							A0A178VVJ7	CYP19-1	Peptidyl-prolyl cis-trans isomerase CYP19-1	U50	NaN	943440
HVVFGQVVEGLNVVR	0	Unmodified					_HVVFGQVVEGLNVVR_							A0A178VVJ7	CYP19-1	Peptidyl-prolyl cis-trans isomerase CYP19-1	U0	115.34	4724400
HVVFGQVVEGLNVVR	0	Unmodified					_HVVFGQVVEGLNVVR_							A0A178VVJ7	CYP19-1	Peptidyl-prolyl cis-trans isomerase CYP19-1	U50	NaN	1700700
HVVFGQVVEGLNVVRDIEK	1	Unmodified					_HVVFGQVVEGLNVVRDIEK_							A0A178VVJ7	CYP19-1	Peptidyl-prolyl cis-trans isomerase CYP19-1	U0	49.306	4086500
IVMELYADTTPETAENFR	0	Oxidation (M)				1	_IVM(ox)ELYADTTPETAENFR_			IVM(1)ELYADTTPETAENFR			IVM(111.22)ELYADTTPETAENFR	A0A178VVJ7	CYP19-1	Peptidyl-prolyl cis-trans isomerase CYP19-1	U0	111.22	8358300
IVMELYADTTPETAENFR	0	Oxidation (M)				1	_IVM(ox)ELYADTTPETAENFR_			IVM(1)ELYADTTPETAENFR			IVM(202.32)ELYADTTPETAENFR	A0A178VVJ7	CYP19-1	Peptidyl-prolyl cis-trans isomerase CYP19-1	U0	202.32	5265800
IVMELYADTTPETAENFR	0	Unmodified					_IVMELYADTTPETAENFR_							A0A178VVJ7	CYP19-1	Peptidyl-prolyl cis-trans isomerase CYP19-1	U0	255.23	21765000
TSKPVVIADCGQIS	1	Unmodified					_TSKPVVIADCGQIS_							A0A178VVJ7	CYP19-1	Peptidyl-prolyl cis-trans isomerase CYP19-1	U0	96.229	42005000
TSKPVVIADCGQIS	1	Unmodified					_TSKPVVIADCGQIS_							A0A178VVJ7	CYP19-1	Peptidyl-prolyl cis-trans isomerase CYP19-1	U50	NaN	25833000
VYFDMTVGGK	0	Oxidation (M)				1	_VYFDM(ox)TVGGK_			VYFDM(1)TVGGK			VYFDM(55.9)TVGGK	A0A178VVJ7	CYP19-1	Peptidyl-prolyl cis-trans isomerase CYP19-1	U0	55.898	4375300
VYFDMTVGGK	0	Unmodified					_VYFDMTVGGK_							A0A178VVJ7	CYP19-1	Peptidyl-prolyl cis-trans isomerase CYP19-1	U0	90.709	28770000
VYFDMTVGGK	0	Unmodified					_VYFDMTVGGK_							A0A178VVJ7	CYP19-1	Peptidyl-prolyl cis-trans isomerase CYP19-1	U50	NaN	7282600
NSFTYHGLDNEK	0	Unmodified					_NSFTYHGLDNEK_							A0A178VVJ8	IBR5	Protein-tyrosine-phosphatase IBR5	U50	74.537	22633000
SELLKTQGISR	1	Unmodified					_SELLKTQGISR_							A0A178VVJ8	IBR5	Protein-tyrosine-phosphatase IBR5	U50	134.75	24214000
SPAVVVAYLMK	0	Unmodified					_SPAVVVAYLMK_							A0A178VVJ8	IBR5	Protein-tyrosine-phosphatase IBR5	U0	NaN	1434200
SPAVVVAYLMK	0	Unmodified					_SPAVVVAYLMK_							A0A178VVJ8	IBR5	Protein-tyrosine-phosphatase IBR5	U50	108.98	22022000
SPAVVVAYLMKR	1	Unmodified					_SPAVVVAYLMKR_							A0A178VVJ8	IBR5	Protein-tyrosine-phosphatase IBR5	U50	138.26	3296700
VLNTVPMCQNLYR	0	Unmodified					_VLNTVPMCQNLYR_							A0A178VVJ8	IBR5	Protein-tyrosine-phosphatase IBR5	U0	63.426	2973000
VLNTVPMCQNLYR	0	Unmodified					_VLNTVPMCQNLYR_							A0A178VVJ8	IBR5	Protein-tyrosine-phosphatase IBR5	U50	140.16	35649000
VLNTVPMCQNLYR	0	Oxidation (M)				1	_VLNTVPM(ox)CQNLYR_			VLNTVPM(1)CQNLYR			VLNTVPM(59.43)CQNLYR	A0A178VVJ8	IBR5	Protein-tyrosine-phosphatase IBR5	U50	59.426	9111500
AYIEALNEDPKQYR	1	Unmodified					_AYIEALNEDPKQYR_							A0A178VVV5	THF1	Protein THYLAKOID FORMATION 1, chloroplastic	U0	109.15	11018000
AYIEALNEDPKQYR	1	Unmodified					_AYIEALNEDPKQYR_							A0A178VVV5	THF1	Protein THYLAKOID FORMATION 1, chloroplastic	U50	NaN	1853600
ELLKEYVEREK	2	Unmodified					_ELLKEYVEREK_							A0A178VVV5	THF1	Protein THYLAKOID FORMATION 1, chloroplastic	U0	70.728	7535800
ELLKEYVEREK	2	Unmodified					_ELLKEYVEREK_							A0A178VVV5	THF1	Protein THYLAKOID FORMATION 1, chloroplastic	U50	NaN	1953600
SQTSASLVDFSSK	0	Unmodified					_SQTSASLVDFSSK_							A0A178VVV5	THF1	Protein THYLAKOID FORMATION 1, chloroplastic	U0	107.03	5678700
SQTSASLVDFSSK	0	Unmodified					_SQTSASLVDFSSK_							A0A178VVV5	THF1	Protein THYLAKOID FORMATION 1, chloroplastic	U50	NaN	2610300
SVDRDLDVYR	1	Unmodified					_SVDRDLDVYR_							A0A178VVV5	THF1	Protein THYLAKOID FORMATION 1, chloroplastic	U0	84.507	8374000
SVDRDLDVYR	1	Unmodified					_SVDRDLDVYR_							A0A178VVV5	THF1	Protein THYLAKOID FORMATION 1, chloroplastic	U50	NaN	3173300
FVESLGVEK	0	Unmodified					_FVESLGVEK_							A0A178VW63	At2g39730;RCA	Ribulose bisphosphate carboxylase/oxygenase activase, chloroplastic	U50	89.698	13531000
FYWAPTREDR	1	Unmodified					_FYWAPTREDR_							A0A178VW63	At2g39730;RCA	Ribulose bisphosphate carboxylase/oxygenase activase, chloroplastic	U50	72.006	16246000
GTFYGKTEEKEPSK	2	Unmodified					_GTFYGKTEEKEPSK_							A0A178VW63			U50	90.444	2303900
CAASAAPTTSVTQK	0	Unmodified					_CAASAAPTTSVTQK_							A0A178VWX1	GOS12	Golgi SNAP receptor complex member 1-2	U50	135.99	16058000
LLDINDSMSR	0	Unmodified					_LLDINDSMSR_							A0A178VWX1	GOS12	Golgi SNAP receptor complex member 1-2	U0	NaN	3376500
LLDINDSMSR	0	Unmodified					_LLDINDSMSR_							A0A178VWX1	GOS12	Golgi SNAP receptor complex member 1-2	U50	191.78	13614000
FTQGGYVDTGSPTVGSGR	0	Unmodified					_FTQGGYVDTGSPTVGSGR_							A0A178VWX1			U0	89.466	8914400
FTQGGYVDTGSPTVGSGR	0	Unmodified					_FTQGGYVDTGSPTVGSGR_							A0A178VWX1			U50	191.51	36928000
VLVETSTLK	0	Unmodified					_VLVETSTLK_							A0A178VXS7		LRR repeats and ubiquitin-like domain-containing protein At2g30105	U0	93.429	2928900
VLVETSTLKQSDVGSGAK	1	Unmodified					_VLVETSTLKQSDVGSGAK_							A0A178VXS7		LRR repeats and ubiquitin-like domain-containing protein At2g30105	U0	71.592	4500700
DSGNGGWDNWDNDDSFR	0	Unmodified					_DSGNGGWDNWDNDDSFR_							A0A178VYR1	AGD7	ADP-ribosylation factor GTPase-activating protein AGD7	U0	160.56	2598900
DSGNGGWDNWDNDDSFR	0	Unmodified					_DSGNGGWDNWDNDDSFR_							A0A178VYR1	AGD7	ADP-ribosylation factor GTPase-activating protein AGD7	U50	79.466	1494000
ESVGGGLMNK	0	Unmodified					_ESVGGGLMNK_							A0A178VYR1	AGD7	ADP-ribosylation factor GTPase-activating protein AGD7	U0	85.642	24430000
ESVGGGLMNK	0	Unmodified					_ESVGGGLMNK_							A0A178VYR1	AGD7	ADP-ribosylation factor GTPase-activating protein AGD7	U50	117.1	27897000
ESVGGGLMNKKPPLSQGGGR	2	Oxidation (M)				1	_ESVGGGLM(ox)NKKPPLSQGGGR_							A0A178VYR1	AGD7	ADP-ribosylation factor GTPase-activating protein AGD7	U0	NaN	3710500
ESVGGGLMNKKPPLSQGGGR	2	Unmodified					_ESVGGGLMNKKPPLSQGGGR_							A0A178VYR1	AGD7	ADP-ribosylation factor GTPase-activating protein AGD7	U0	NaN	5630300
ESVGGGLMNKKPPLSQGGGR	2	Unmodified					_ESVGGGLMNKKPPLSQGGGR_							A0A178VYR1	AGD7	ADP-ribosylation factor GTPase-activating protein AGD7	U0	NaN	13722000
ESVGGGLMNKKPPLSQGGGR	2	Oxidation (M)				1	_ESVGGGLM(ox)NKKPPLSQGGGR_			ESVGGGLM(1)NKKPPLSQGGGR			ESVGGGLM(42.91)NKKPPLSQGGGR	A0A178VYR1	AGD7	ADP-ribosylation factor GTPase-activating protein AGD7	U50	42.908	3884300
ESVGGGLMNKKPPLSQGGGR	2	Unmodified					_ESVGGGLMNKKPPLSQGGGR_							A0A178VYR1	AGD7	ADP-ribosylation factor GTPase-activating protein AGD7	U50	73.11	26501000
ESVGGGLMNKKPPLSQGGGR	2	Unmodified					_ESVGGGLMNKKPPLSQGGGR_							A0A178VYR1	AGD7	ADP-ribosylation factor GTPase-activating protein AGD7	U50	60.329	10438000
LNNFLAQYGISK	0	Unmodified					_LNNFLAQYGISK_							A0A178VYR1	AGD7	ADP-ribosylation factor GTPase-activating protein AGD7	U0	163.65	21175000
LNNFLAQYGISK	0	Unmodified					_LNNFLAQYGISK_							A0A178VYR1	AGD7	ADP-ribosylation factor GTPase-activating protein AGD7	U50	176.6	14169000
LNNFLAQYGISKETDIISK	1	Unmodified					_LNNFLAQYGISKETDIISK_							A0A178VYR1	AGD7	ADP-ribosylation factor GTPase-activating protein AGD7	U0	NaN	20972000
LNNFLAQYGISKETDIISK	1	Unmodified					_LNNFLAQYGISKETDIISK_							A0A178VYR1	AGD7	ADP-ribosylation factor GTPase-activating protein AGD7	U50	48.959	17032000
SVTMDSWSEIQIK	0	Unmodified					_SVTMDSWSEIQIK_							A0A178VYR1	AGD7	ADP-ribosylation factor GTPase-activating protein AGD7	U0	148.56	4830500
SVTMDSWSEIQIK	0	Oxidation (M)				1	_SVTM(ox)DSWSEIQIK_							A0A178VYR1	AGD7	ADP-ribosylation factor GTPase-activating protein AGD7	U0	NaN	8536300
SVTMDSWSEIQIK	0	Unmodified					_SVTMDSWSEIQIK_							A0A178VYR1	AGD7	ADP-ribosylation factor GTPase-activating protein AGD7	U50	NaN	8315400
SVTMDSWSEIQIK	0	Oxidation (M)				1	_SVTM(ox)DSWSEIQIK_			SVTM(1)DSWSEIQIK			SVTM(55.72)DSWSEIQIK	A0A178VYR1	AGD7	ADP-ribosylation factor GTPase-activating protein AGD7	U50	55.718	10309000
SVTMDSWSEIQIKK	1	Oxidation (M)				1	_SVTM(ox)DSWSEIQIKK_			SVTM(1)DSWSEIQIKK			SVTM(77.08)DSWSEIQIKK	A0A178VYR1	AGD7	ADP-ribosylation factor GTPase-activating protein AGD7	U0	77.078	6122300
SVTMDSWSEIQIKK	1	Oxidation (M)				1	_SVTM(ox)DSWSEIQIKK_			SVTM(1)DSWSEIQIKK			SVTM(88.55)DSWSEIQIKK	A0A178VYR1	AGD7	ADP-ribosylation factor GTPase-activating protein AGD7	U50	88.552	8848300
DRIQALAEGR	1	Unmodified					_DRIQALAEGR_							A0A178VYR1	AGD6;AGD7	Probable ADP-ribosylation factor GTPase-activating protein AGD6;ADP-ribosylation factor GTPase-activating protein AGD7	U0	159.09	5973400
DRIQALAEGR	1	Unmodified					_DRIQALAEGR_							A0A178VYR1	AGD6;AGD7	Probable ADP-ribosylation factor GTPase-activating protein AGD6;ADP-ribosylation factor GTPase-activating protein AGD7	U50	199.33	9551000
ETDIISKYNSNAASVYR	1	Unmodified					_ETDIISKYNSNAASVYR_							A0A178VYR1	AGD6;AGD7	Probable ADP-ribosylation factor GTPase-activating protein AGD6;ADP-ribosylation factor GTPase-activating protein AGD7	U0	113.01	8994100
ETDIISKYNSNAASVYR	1	Unmodified					_ETDIISKYNSNAASVYR_							A0A178VYR1	AGD6;AGD7	Probable ADP-ribosylation factor GTPase-activating protein AGD6;ADP-ribosylation factor GTPase-activating protein AGD7	U50	125.67	12071000
GLGVHISFVR	0	Unmodified					_GLGVHISFVR_							A0A178VYR1	AGD6;AGD7	Probable ADP-ribosylation factor GTPase-activating protein AGD6;ADP-ribosylation factor GTPase-activating protein AGD7	U0	107.69	10633000
GLGVHISFVR	0	Unmodified					_GLGVHISFVR_							A0A178VYR1	AGD6;AGD7	Probable ADP-ribosylation factor GTPase-activating protein AGD6;ADP-ribosylation factor GTPase-activating protein AGD7	U50	NaN	13067000
YNSNAASVYR	0	Unmodified					_YNSNAASVYR_							A0A178VYR1	AGD6;AGD7	Probable ADP-ribosylation factor GTPase-activating protein AGD6;ADP-ribosylation factor GTPase-activating protein AGD7	U0	197.5	21789000
YNSNAASVYR	0	Unmodified					_YNSNAASVYR_							A0A178VYR1	AGD6;AGD7	Probable ADP-ribosylation factor GTPase-activating protein AGD6;ADP-ribosylation factor GTPase-activating protein AGD7	U50	201.57	26756000
YNSNAASVYRDR	1	Unmodified					_YNSNAASVYRDR_							A0A178VYR1	AGD6;AGD7	Probable ADP-ribosylation factor GTPase-activating protein AGD6;ADP-ribosylation factor GTPase-activating protein AGD7	U0	132.03	38889000
YNSNAASVYRDR	1	Unmodified					_YNSNAASVYRDR_							A0A178VYR1	AGD6;AGD7	Probable ADP-ribosylation factor GTPase-activating protein AGD6;ADP-ribosylation factor GTPase-activating protein AGD7	U0	NaN	3099000
YNSNAASVYRDR	1	Unmodified					_YNSNAASVYRDR_							A0A178VYR1	AGD6;AGD7	Probable ADP-ribosylation factor GTPase-activating protein AGD6;ADP-ribosylation factor GTPase-activating protein AGD7	U50	143.22	70561000
YNSNAASVYRDR	1	Unmodified					_YNSNAASVYRDR_							A0A178VYR1	AGD6;AGD7	Probable ADP-ribosylation factor GTPase-activating protein AGD6;ADP-ribosylation factor GTPase-activating protein AGD7	U50	152.17	5761500
FEVIFSPALGR	0	Unmodified					_FEVIFSPALGR_							A0A178VYR2		Haloacid dehalogenase-like hydrolase domain-containing protein At2g33255	U0	123.35	13968000
AYQISTLSDFQYIDSGGRDQGSNVR	1	Unmodified					_AYQISTLSDFQYIDSGGRDQGSNVR_							A0A178VZ34	EPSIN2	Clathrin interactor EPSIN 2	U50	215.58	20363000
KVLKVPGVEQK	2	Unmodified					_KVLKVPGVEQK_							A0A178VZ34	EPSIN2	Clathrin interactor EPSIN 2	U50	47.724	3597800
SQSLVALVNDKER	1	Unmodified					_SQSLVALVNDKER_							A0A178VZ34	EPSIN2	Clathrin interactor EPSIN 2	U0	54.276	5352600
SQSLVALVNDKER	1	Unmodified					_SQSLVALVNDKER_							A0A178VZ34	EPSIN2	Clathrin interactor EPSIN 2	U50	91.307	65088000
SQSLVALVNDKER	1	Unmodified					_SQSLVALVNDKER_							A0A178VZ34	EPSIN2	Clathrin interactor EPSIN 2	U50	224.66	12080000
VIDEIRER	1	Unmodified					_VIDEIRER_							A0A178VZ34	EPSIN2	Clathrin interactor EPSIN 2	U50	147.19	10445000
ALTVLEYMVGHGSER	0	Oxidation (M)				1	_ALTVLEYM(ox)VGHGSER_							A0A178VZ34	EPSIN2;EPSIN3	Clathrin interactor EPSIN 2;Clathrin interactor EPSIN 3	U0	NaN	1571000
ALTVLEYMVGHGSER	0	Unmodified					_ALTVLEYMVGHGSER_							A0A178VZ34	EPSIN2;EPSIN3	Clathrin interactor EPSIN 2;Clathrin interactor EPSIN 3	U0	NaN	2862400
ALTVLEYMVGHGSER	0	Oxidation (M)				1	_ALTVLEYM(ox)VGHGSER_			ALTVLEYM(1)VGHGSER			ALTVLEYM(76.31)VGHGSER	A0A178VZ34	EPSIN2;EPSIN3	Clathrin interactor EPSIN 2;Clathrin interactor EPSIN 3	U50	76.311	13947000
ALTVLEYMVGHGSER	0	Unmodified					_ALTVLEYMVGHGSER_							A0A178VZ34	EPSIN2;EPSIN3	Clathrin interactor EPSIN 2;Clathrin interactor EPSIN 3	U50	88.507	34923000
ILEILAFKTFK	1	Unmodified					_ILEILAFKTFK_							A0A178VZ67	U1A	U1 small nuclear ribonucleoprotein A	U50	45.126	4725200
MNNFPFYDKEMR	1	Unmodified					_MNNFPFYDKEMR_							A0A178VZ67	U1A	U1 small nuclear ribonucleoprotein A	U50	95.162	24846000
SDVVAKADGTFVPR	1	Unmodified					_SDVVAKADGTFVPR_							A0A178VZ67	U1A	U1 small nuclear ribonucleoprotein A	U0	NaN	2107800
SDVVAKADGTFVPR	1	Unmodified					_SDVVAKADGTFVPR_							A0A178VZ67	U1A	U1 small nuclear ribonucleoprotein A	U50	54.729	11010000
SLNAVFSQFGK	0	Unmodified					_SLNAVFSQFGK_							A0A178VZ67	U1A	U1 small nuclear ribonucleoprotein A	U0	NaN	2403500
SLNAVFSQFGK	0	Unmodified					_SLNAVFSQFGK_							A0A178VZ67	U1A	U1 small nuclear ribonucleoprotein A	U50	98.048	20875000
AIGVSNFSSK	0	Unmodified					_AIGVSNFSSK_							A0A178VZ90	AKR4C10;AKR4C8	Aldo-keto reductase family 4 member C10;Aldo-keto reductase family 4 member C8	U0	103.42	23040000
AIGVSNFSSK	0	Unmodified					_AIGVSNFSSK_							A0A178VZ90	AKR4C10;AKR4C8	Aldo-keto reductase family 4 member C10;Aldo-keto reductase family 4 member C8	U50	NaN	15856000
GVHLSGYSPLGSQSK	0	Unmodified					_GVHLSGYSPLGSQSK_							A0A178VZ90	AKR4C8	Aldo-keto reductase family 4 member C8	U0	80.379	9594300
KLTDLLNVAR	1	Unmodified					_KLTDLLNVAR_							A0A178VZ90	AKR4C8	Aldo-keto reductase family 4 member C8	U0	125.82	2984500
KLTDLLNVAR	1	Unmodified					_KLTDLLNVAR_							A0A178VZ90	AKR4C8	Aldo-keto reductase family 4 member C8	U50	107.57	2712700
LTDLLNVAR	0	Unmodified					_LTDLLNVAR_							A0A178VZ90	AKR4C8	Aldo-keto reductase family 4 member C8	U0	139.68	3958000
LTDLLNVAR	0	Unmodified					_LTDLLNVAR_							A0A178VZ90	AKR4C8	Aldo-keto reductase family 4 member C8	U50	NaN	1726800
VLQNPIVTEVAEK	0	Unmodified					_VLQNPIVTEVAEK_							A0A178VZ90	AKR4C8	Aldo-keto reductase family 4 member C8	U0	86.014	3715800
VLQNPIVTEVAEK	0	Unmodified					_VLQNPIVTEVAEK_							A0A178VZ90	AKR4C8	Aldo-keto reductase family 4 member C8	U50	NaN	5199200
GSIFKMDNDFEKR	2	Unmodified					_GSIFKMDNDFEKR_							A0A178VZA0	ATG8E	Autophagy-related protein 8e	U0	38.977	4040300
MNKGSIFK	1	Acetyl (Protein N-term)	1				_(ac)MNKGSIFK_							A0A178VZA0	ATG8E	Autophagy-related protein 8e	U0	121.67	14143000
MNKGSIFK	1	Acetyl (Protein N-term)	1				_(ac)MNKGSIFK_							A0A178VZA0	ATG8E	Autophagy-related protein 8e	U50	NaN	1401600
EKYPDRIPVIVEK	2	Unmodified					_EKYPDRIPVIVEK_							A0A178VZA0	ATG8E;APG8A;ATG8F;ATG8A	Autophagy-related protein 8e;Autophagy-related protein;Autophagy-related protein 8f;Autophagy-related protein 8a	U0	71.513	15969000
EKYPDRIPVIVEK	2	Unmodified					_EKYPDRIPVIVEK_							A0A178VZA0	ATG8E;APG8A;ATG8F;ATG8A	Autophagy-related protein 8e;Autophagy-related protein;Autophagy-related protein 8f;Autophagy-related protein 8a	U50	NaN	1952800
ELNVMFIETSAK	0	Oxidation (M)				1	_ELNVM(ox)FIETSAK_			ELNVM(1)FIETSAK			ELNVM(104.43)FIETSAK	A0A178W0B3	RABH1B	Ras-related protein RABH1b	U0	104.43	7842200
ELNVMFIETSAK	0	Oxidation (M)				1	_ELNVM(ox)FIETSAK_			ELNVM(1)FIETSAK			ELNVM(108.43)FIETSAK	A0A178W0B3	RABH1B	Ras-related protein RABH1b	U50	108.43	5564400
GSDVIVVLVGNKTDLVDKR	2	Unmodified					_GSDVIVVLVGNKTDLVDKR_							A0A178W0B3	RABH1B	Ras-related protein RABH1b	U0	87.654	16446000
GSDVIVVLVGNKTDLVDKR	2	Unmodified					_GSDVIVVLVGNKTDLVDKR_							A0A178W0B3	RABH1B	Ras-related protein RABH1b	U0	123.63	9299400
GSDVIVVLVGNKTDLVDKR	2	Unmodified					_GSDVIVVLVGNKTDLVDKR_							A0A178W0B3	RABH1B	Ras-related protein RABH1b	U50	123.19	4098700
GSDVIVVLVGNKTDLVDKR	2	Unmodified					_GSDVIVVLVGNKTDLVDKR_							A0A178W0B3	RABH1B	Ras-related protein RABH1b	U50	92.39	10288000
QSFLNTTK	0	Unmodified					_QSFLNTTK_							A0A178W0B3	RABH1B	Ras-related protein RABH1b	U0	NaN	11325000
QSFLNTTK	0	Unmodified					_QSFLNTTK_							A0A178W0B3	RABH1B	Ras-related protein RABH1b	U50	73.208	8151400
QVSIEEAEAKAR	1	Unmodified					_QVSIEEAEAKAR_							A0A178W0B3	RABH1B	Ras-related protein RABH1b	U0	92.925	23288000
QVSIEEAEAKAR	1	Unmodified					_QVSIEEAEAKAR_							A0A178W0B3	RABH1B	Ras-related protein RABH1b	U50	93.623	31634000
WIDEVRTER	1	Unmodified					_WIDEVRTER_							A0A178W0B3	RABH1B	Ras-related protein RABH1b	U0	102.06	15302000
WIDEVRTER	1	Unmodified					_WIDEVRTER_							A0A178W0B3	RABH1B	Ras-related protein RABH1b	U50	127.4	13084000
YKLVFLGDQSVGK	1	Unmodified					_YKLVFLGDQSVGK_							A0A178W0B3	RABH1B;RABH1D;RABH1E	Ras-related protein RABH1b;Ras-related protein RABH1d;Ras-related protein RABH1e	U0	65.043	12136000
YKLVFLGDQSVGK	1	Unmodified					_YKLVFLGDQSVGK_							A0A178W0B3	RABH1B;RABH1D;RABH1E	Ras-related protein RABH1b;Ras-related protein RABH1d;Ras-related protein RABH1e	U0	116.75	2763100
YKLVFLGDQSVGK	1	Unmodified					_YKLVFLGDQSVGK_							A0A178W0B3	RABH1B;RABH1D;RABH1E	Ras-related protein RABH1b;Ras-related protein RABH1d;Ras-related protein RABH1e	U50	69.345	11310000
YKLVFLGDQSVGK	1	Unmodified					_YKLVFLGDQSVGK_							A0A178W0B3	RABH1B;RABH1D;RABH1E	Ras-related protein RABH1b;Ras-related protein RABH1d;Ras-related protein RABH1e	U50	NaN	2355100
LVFLGDQSVGK	0	Unmodified					_LVFLGDQSVGK_							A0A178W0B3	RABH1B;RABH1D;RABH1E;RABH1C	Ras-related protein RABH1b;Ras-related protein RABH1d;Ras-related protein RABH1e;Ras-related protein RABH1c	U0	91.265	31735000
LVFLGDQSVGK	0	Unmodified					_LVFLGDQSVGK_							A0A178W0B3	RABH1B;RABH1D;RABH1E;RABH1C	Ras-related protein RABH1b;Ras-related protein RABH1d;Ras-related protein RABH1e;Ras-related protein RABH1c	U50	105.4	24310000
LVFLGDQSVGKTSIITR	1	Unmodified					_LVFLGDQSVGKTSIITR_							A0A178W0B3	RABH1B;RABH1D;RABH1E;RABH1C	Ras-related protein RABH1b;Ras-related protein RABH1d;Ras-related protein RABH1e;Ras-related protein RABH1c	U0	61.648	5516400
LVFLGDQSVGKTSIITR	1	Unmodified					_LVFLGDQSVGKTSIITR_							A0A178W0B3	RABH1B;RABH1D;RABH1E;RABH1C	Ras-related protein RABH1b;Ras-related protein RABH1d;Ras-related protein RABH1e;Ras-related protein RABH1c	U50	79.013	6750200
SLIPSYIR	0	Unmodified					_SLIPSYIR_							A0A178W0B3	RABH1B;RABH1D;RABH1E;RABH1C	Ras-related protein RABH1b;Ras-related protein RABH1d;Ras-related protein RABH1e;Ras-related protein RABH1c	U0	92.187	14530000
SLIPSYIR	0	Unmodified					_SLIPSYIR_							A0A178W0B3	RABH1B;RABH1D;RABH1E;RABH1C	Ras-related protein RABH1b;Ras-related protein RABH1d;Ras-related protein RABH1e;Ras-related protein RABH1c	U50	96.19	14413000
TMYLEDR	0	Unmodified					_TMYLEDR_							A0A178W0B3	RABH1B;RABH1D;RABH1E;RABH1C	Ras-related protein RABH1b;Ras-related protein RABH1d;Ras-related protein RABH1e;Ras-related protein RABH1c	U0	120.65	26745000
TMYLEDR	0	Unmodified					_TMYLEDR_							A0A178W0B3	RABH1B;RABH1D;RABH1E;RABH1C	Ras-related protein RABH1b;Ras-related protein RABH1d;Ras-related protein RABH1e;Ras-related protein RABH1c	U50	113.1	25270000
LQLWDTAGQER	0	Unmodified					_LQLWDTAGQER_							A0A178W0B3	RABH1B;RABH1D;RABH1E;RABH1C;RABH1A	Ras-related protein RABH1b;Ras-related protein RABH1d;Ras-related protein RABH1e;Ras-related protein RABH1c;Ras-related protein RABH1a	U0	236.56	47500000
LQLWDTAGQER	0	Unmodified					_LQLWDTAGQER_							A0A178W0B3	RABH1B;RABH1D;RABH1E;RABH1C;RABH1A	Ras-related protein RABH1b;Ras-related protein RABH1d;Ras-related protein RABH1e;Ras-related protein RABH1c;Ras-related protein RABH1a	U50	244.55	56412000
GVISVGDCLTVK	0	Unmodified					_GVISVGDCLTVK_							A0A178W3K4	PH1	Pleckstrin homology domain-containing protein 1	U0	134.59	13592000
GVISVGDCLTVK	0	Unmodified					_GVISVGDCLTVK_							A0A178W3K4	PH1	Pleckstrin homology domain-containing protein 1	U50	112.71	20878000
LLWFKDQAAAGIR	1	Unmodified					_LLWFKDQAAAGIR_							A0A178W3K4	PH1	Pleckstrin homology domain-containing protein 1	U0	93.959	1989400
LLWFKDQAAAGIR	1	Unmodified					_LLWFKDQAAAGIR_							A0A178W3K4	PH1	Pleckstrin homology domain-containing protein 1	U50	95.094	6264900
SVTDSEVLDYDHRR	1	Unmodified					_SVTDSEVLDYDHRR_							A0A178W3K4	PH1	Pleckstrin homology domain-containing protein 1	U0	178.15	42895000
SVTDSEVLDYDHRR	1	Unmodified					_SVTDSEVLDYDHRR_							A0A178W3K4	PH1	Pleckstrin homology domain-containing protein 1	U0	157.52	22123000
SVTDSEVLDYDHRR	1	Unmodified					_SVTDSEVLDYDHRR_							A0A178W3K4	PH1	Pleckstrin homology domain-containing protein 1	U50	133.32	54471000
SVTDSEVLDYDHRR	1	Unmodified					_SVTDSEVLDYDHRR_							A0A178W3K4	PH1	Pleckstrin homology domain-containing protein 1	U50	159.5	57333000
AGAEDFWNENDGPVKK	1	Unmodified					_AGAEDFWNENDGPVKK_							A0A178W498	RH48	Probable DEAD-box ATP-dependent RNA helicase 48	U0	54.859	7753000
SGSDSIDSTSNSPIDVR	0	Unmodified					_SGSDSIDSTSNSPIDVR_							A0A178W498	RH48	Probable DEAD-box ATP-dependent RNA helicase 48	U0	98.368	9735100
LLDQEKQLYEAR	1	Unmodified					_LLDQEKQLYEAR_							A0A178W498	RH48;RH33	Probable DEAD-box ATP-dependent RNA helicase 48;Putative DEAD-box ATP-dependent RNA helicase 33	U0	89.301	8227700
LSWGRNPANKQPR	2	Unmodified					_LSWGRNPANKQPR_							A0A178W4G6	RBP47C;RBP47C	Polyadenylate-binding protein RBP47C;Polyadenylate-binding protein RBP47C	U50	102.87	5317500
GVEFEYREEDLR	1	Unmodified					_GVEFEYREEDLR_							A0A178W4K6	GSTU19	Glutathione S-transferase U19	U0	87.641	12196000
SPLLLQMNPIHK	0	Unmodified					_SPLLLQMNPIHK_							A0A178W4K6	GSTU19;GSTU23	Glutathione S-transferase U19;Glutathione S-transferase U23	U0	47.039	3179700
RDGSEDQPLSSAGNNGEVKDR	2	Unmodified					_RDGSEDQPLSSAGNNGEVKDR_							A0A178W4N7	UPF3	Regulator of nonsense transcripts UPF3	U0	26.21	981820
SGEVVNSSGGHTLENGSAR	0	Unmodified					_SGEVVNSSGGHTLENGSAR_							A0A178W4N7	UPF3	Regulator of nonsense transcripts UPF3	U0	37.552	1592600
VLPSLNGK	0	Unmodified					_VLPSLNGK_							A0A178W4Q5	GAPC2;At1g13440	Glyceraldehyde-3-phosphate dehydrogenase GAPC2, cytosolic;Glyceraldehyde-3-phosphate dehydrogenase	U0	106.42	10120000
VLPSLNGK	0	Unmodified					_VLPSLNGK_							A0A178W4Q5	GAPC2;At1g13440	Glyceraldehyde-3-phosphate dehydrogenase GAPC2, cytosolic;Glyceraldehyde-3-phosphate dehydrogenase	U50	107.43	37432000
YDSVHGQWKHHELK	1	Unmodified					_YDSVHGQWKHHELK_							A0A178W4Q5	GAPC2;At1g13440	Glyceraldehyde-3-phosphate dehydrogenase GAPC2, cytosolic;Glyceraldehyde-3-phosphate dehydrogenase	U50	50.843	3130700
ALQNIGASNRDDAFYR	1	Acetyl (Protein N-term)	1				_(ac)ALQNIGASNRDDAFYR_							A0A178W594		Probable eukaryotic translation initiation factor 5-1	U0	145.69	25998000
ALQNIGASNRDDAFYR	1	Acetyl (Protein N-term)	1				_(ac)ALQNIGASNRDDAFYR_							A0A178W594		Probable eukaryotic translation initiation factor 5-1	U0	286.29	32952000
ALQNIGASNRDDAFYR	1	Acetyl (Protein N-term)	1				_(ac)ALQNIGASNRDDAFYR_							A0A178W594		Probable eukaryotic translation initiation factor 5-1	U50	90.725	5288100
ALQNIGASNRDDAFYR	1	Acetyl (Protein N-term)	1				_(ac)ALQNIGASNRDDAFYR_							A0A178W594		Probable eukaryotic translation initiation factor 5-1	U50	190.78	5465800
CAACGFLSDVDMR	0	Unmodified					_CAACGFLSDVDMR_							A0A178W594		Probable eukaryotic translation initiation factor 5-1	U0	138.22	4144100
DKLTSFILK	1	Unmodified					_DKLTSFILK_							A0A178W594		Probable eukaryotic translation initiation factor 5-1	U0	105.94	8373800
DKLTSFILK	1	Unmodified					_DKLTSFILK_							A0A178W594		Probable eukaryotic translation initiation factor 5-1	U50	NaN	1718100
KYVQCYGCGNPETEILITK	1	Unmodified					_KYVQCYGCGNPETEILITK_							A0A178W594		Probable eukaryotic translation initiation factor 5-1	U0	87.676	7261500
LTSFILK	0	Unmodified					_LTSFILK_							A0A178W594		Probable eukaryotic translation initiation factor 5-1	U0	110.34	6601000
LTSFILK	0	Unmodified					_LTSFILK_							A0A178W594		Probable eukaryotic translation initiation factor 5-1	U50	NaN	1422700
TNVVNMVEIAK	0	Unmodified					_TNVVNMVEIAK_							A0A178W594		Probable eukaryotic translation initiation factor 5-1	U0	98.04	50356000
TNVVNMVEIAK	0	Unmodified					_TNVVNMVEIAK_							A0A178W594		Probable eukaryotic translation initiation factor 5-1	U50	NaN	10139000
YVQCYGCGNPETEILITK	0	Unmodified					_YVQCYGCGNPETEILITK_							A0A178W594		Probable eukaryotic translation initiation factor 5-1	U0	115.78	5091300
ALQNIGASNR	0	Acetyl (Protein N-term)	1				_(ac)ALQNIGASNR_							A0A178W594		Probable eukaryotic translation initiation factor 5-1;Probable eukaryotic translation initiation factor 5-2	U0	105.1	5851100
LAGLLENFIKK	1	Unmodified					_LAGLLENFIKK_							A0A178W594		Probable eukaryotic translation initiation factor 5-1;Probable eukaryotic translation initiation factor 5-2	U0	99.283	13155000
LAGLLENFIKK	1	Unmodified					_LAGLLENFIKK_							A0A178W594		Probable eukaryotic translation initiation factor 5-1;Probable eukaryotic translation initiation factor 5-2	U50	NaN	1748400
YFGCELGAQSK	0	Unmodified					_YFGCELGAQSK_							A0A178W594		Probable eukaryotic translation initiation factor 5-1;Probable eukaryotic translation initiation factor 5-2	U0	128.6	30055000
YFGCELGAQSK	0	Unmodified					_YFGCELGAQSK_							A0A178W594		Probable eukaryotic translation initiation factor 5-1;Probable eukaryotic translation initiation factor 5-2	U50	128.28	5460200
YFGCELGAQSKFDEK	1	Unmodified					_YFGCELGAQSKFDEK_							A0A178W594		Probable eukaryotic translation initiation factor 5-1;Probable eukaryotic translation initiation factor 5-2	U0	91.076	10131000
YFGCELGAQSKFDEK	1	Unmodified					_YFGCELGAQSKFDEK_							A0A178W594		Probable eukaryotic translation initiation factor 5-1;Probable eukaryotic translation initiation factor 5-2	U50	NaN	2294700
GAGGFSNSSQPFSYK	0	Unmodified					_GAGGFSNSSQPFSYK_							A0A178W5C4	ECH2	Enoyl-CoA hydratase 2, peroxisomal	U0	NaN	3661300
GAGGFSNSSQPFSYK	0	Unmodified					_GAGGFSNSSQPFSYK_							A0A178W5C4	ECH2	Enoyl-CoA hydratase 2, peroxisomal	U50	127.83	5075900
IPQRQPLTVCEER	1	Unmodified					_IPQRQPLTVCEER_							A0A178W5C4	ECH2	Enoyl-CoA hydratase 2, peroxisomal	U0	NaN	2965700
IPQRQPLTVCEER	1	Unmodified					_IPQRQPLTVCEER_							A0A178W5C4	ECH2	Enoyl-CoA hydratase 2, peroxisomal	U50	92.939	4934900
TQPSQALLYR	0	Unmodified					_TQPSQALLYR_							A0A178W5C4	ECH2	Enoyl-CoA hydratase 2, peroxisomal	U0	NaN	5789300
TQPSQALLYR	0	Unmodified					_TQPSQALLYR_							A0A178W5C4	ECH2	Enoyl-CoA hydratase 2, peroxisomal	U50	119.41	12652000
GYGFCEYKDEETALSAR	1	Unmodified					_GYGFCEYKDEETALSAR_							A0A178W5F3	CSTF64	Cleavage stimulating factor 64	U0	65.231	7113300
LTVDDAAARDNR	1	Unmodified					_LTVDDAAARDNR_							A0A178W5G5	F7G19.6		U0	78.903	1491000
LTVDDAAARDNR	1	Unmodified					_LTVDDAAARDNR_							A0A178W5G5	F7G19.6		U50	80.69	3573800
SLESSLATGNLQK	0	Unmodified					_SLESSLATGNLQK_							A0A178W5G8	CHMP1B	ESCRT-related protein CHMP1B	U50	188.87	10412000
IYAENAIR	0	Unmodified					_IYAENAIR_							A0A178W5G8	CHMP1B;CHMP1A	ESCRT-related protein CHMP1B;ESCRT-related protein CHMP1A	U50	158.38	13843000
AFGMELLR	0	Unmodified					_AFGMELLR_							A0A178W619		Probable lactoylglutathione lyase, chloroplast	U0	116.54	11859000
AFGMELLR	0	Unmodified					_AFGMELLR_							A0A178W619		Probable lactoylglutathione lyase, chloroplast	U50	132.09	10226000
GPTPEPLCQVMLR	0	Unmodified					_GPTPEPLCQVMLR_							A0A178W619		Probable lactoylglutathione lyase, chloroplast	U0	90.108	2365400
GPTPEPLCQVMLR	0	Unmodified					_GPTPEPLCQVMLR_							A0A178W619		Probable lactoylglutathione lyase, chloroplast	U50	107.79	2860100
ITACLDPDGWK	0	Unmodified					_ITACLDPDGWK_							A0A178W619		Probable lactoylglutathione lyase, chloroplast	U0	75.509	2505500
ITACLDPDGWK	0	Unmodified					_ITACLDPDGWK_							A0A178W619		Probable lactoylglutathione lyase, chloroplast	U50	NaN	3215000
ITREPGPLPGISTK	1	Unmodified					_ITREPGPLPGISTK_							A0A178W619		Probable lactoylglutathione lyase, chloroplast	U0	27.488	5531100
ITREPGPLPGISTK	1	Unmodified					_ITREPGPLPGISTK_							A0A178W619		Probable lactoylglutathione lyase, chloroplast	U50	40.724	9086800
AVINKEEDIAAYTIK	1	Unmodified					_AVINKEEDIAAYTIK_							A0A178W6W0	At1g75290	Isoflavone reductase homolog P3	U0	116.43	34397000
AVINKEEDIAAYTIK	1	Unmodified					_AVINKEEDIAAYTIK_							A0A178W6W0	At1g75290	Isoflavone reductase homolog P3	U50	NaN	2994800
FLPSEFGVDVDR	0	Unmodified					_FLPSEFGVDVDR_							A0A178W6W0		Isoflavone reductase homolog P3	U0	96.89	24535000
FLPSEFGVDVDR	0	Unmodified					_FLPSEFGVDVDR_							A0A178W6W0		Isoflavone reductase homolog P3	U50	NaN	4963900
FLVEASAK	0	Unmodified					_FLVEASAK_							A0A178W6W0		Isoflavone reductase homolog P3	U0	104.21	10368000
FLVEASAK	0	Unmodified					_FLVEASAK_							A0A178W6W0		Isoflavone reductase homolog P3	U50	NaN	610740
IISAIKEAGNVK	1	Unmodified					_IISAIKEAGNVK_							A0A178W6W0	At1g75290;F22H5.16;F22H5.18;T22F8.130;At4g39230	Isoflavone reductase homolog P3	U0	84.479	6239700
IISAIKEAGNVK	1	Unmodified					_IISAIKEAGNVK_							A0A178W6W0	At1g75290;F22H5.16;F22H5.18;T22F8.130;At4g39230	Isoflavone reductase homolog P3	U50	NaN	1643500
IISAIKEAGNVKR	2	Unmodified					_IISAIKEAGNVKR_							A0A178W6W0	At1g75290;F22H5.16;F22H5.18;T22F8.130;At4g39230	Isoflavone reductase homolog P3	U0	95.273	15604000
IISAIKEAGNVKR	2	Unmodified					_IISAIKEAGNVKR_							A0A178W6W0	At1g75290;F22H5.16;F22H5.18;T22F8.130;At4g39230	Isoflavone reductase homolog P3	U50	48.704	5258800
ILVIGGTGYIGK	0	Unmodified					_ILVIGGTGYIGK_							A0A178W6W0		Isoflavone reductase homolog P3	U0	85.807	6101400
SLEKTHLPEEQLLK	1	Unmodified					_SLEKTHLPEEQLLK_							A0A178W6W0		Isoflavone reductase homolog P3	U0	43.592	6279200
TSAVEPAKSAFAGK	1	Unmodified					_TSAVEPAKSAFAGK_							A0A178W6W0		Isoflavone reductase homolog P3	U0	112.15	8629200
VTILGDGNAK	0	Unmodified					_VTILGDGNAK_							A0A178W6W0	F22H5.16	Isoflavone reductase homolog P3	U0	122.44	4587400
ALHETFSAFGPILSCK	0	Unmodified					_ALHETFSAFGPILSCK_							A0A178W710	PAB8	Polyadenylate-binding protein 8	U0	103.88	14903000
ALNELNFMALNGR	0	Oxidation (M)				1	_ALNELNFM(ox)ALNGR_			ALNELNFM(1)ALNGR			ALNELNFM(128.03)ALNGR	A0A178W710	PAB8	Polyadenylate-binding protein 8	U0	128.03	11293000
ALNELNFMALNGR	0	Unmodified					_ALNELNFMALNGR_							A0A178W710	PAB8	Polyadenylate-binding protein 8	U0	163.88	18310000
ALNELNFMALNGR	0	Unmodified					_ALNELNFMALNGR_							A0A178W710	PAB8	Polyadenylate-binding protein 8	U50	NaN	6374300
FEQSLKEAADKSQGSNLYVK	2	Methyl (KR)			1		_FEQSLK(me)EAADKSQGSNLYVK_		FEQSLK(1)EAADKSQGSNLYVK			FEQSLK(45.44)EAADK(-45.44)SQGSNLYVK(-125.85)		A0A178W710	PAB8	Polyadenylate-binding protein 8	U0	141.83	8274000
GFGFVNFENSDDAAR	0	Unmodified					_GFGFVNFENSDDAAR_							A0A178W710	PAB8	Polyadenylate-binding protein 8	U0	183.33	23393000
GFGFVNFENSDDAAR	0	Unmodified					_GFGFVNFENSDDAAR_							A0A178W710	PAB8	Polyadenylate-binding protein 8	U50	120.77	15952000
GSGFVAFSTPEEATR	0	Unmodified					_GSGFVAFSTPEEATR_							A0A178W710	PAB8	Polyadenylate-binding protein 8	U0	181.66	76587000
GSGFVAFSTPEEATR	0	Unmodified					_GSGFVAFSTPEEATR_							A0A178W710	PAB8	Polyadenylate-binding protein 8	U50	178.67	7394400
MIVTKPLYVALAQR	1	Unmodified					_MIVTKPLYVALAQR_							A0A178W710	PAB8	Polyadenylate-binding protein 8	U0	82.069	17339000
NLDESVTDDKLR	1	Unmodified					_NLDESVTDDKLR_							A0A178W710	PAB8	Polyadenylate-binding protein 8	U0	136.96	36030000
NLDESVTDDKLR	1	Unmodified					_NLDESVTDDKLR_							A0A178W710	PAB8	Polyadenylate-binding protein 8	U50	39.561	4295200
NLDESVTDDKLREHFAPFGTITSCK	2	Unmodified					_NLDESVTDDKLREHFAPFGTITSCK_							A0A178W710	PAB8	Polyadenylate-binding protein 8	U0	38.746	5168700
NLDESVTDDKLREHFAPFGTITSCK	2	Unmodified					_NLDESVTDDKLREHFAPFGTITSCK_							A0A178W710	PAB8	Polyadenylate-binding protein 8	U50	NaN	2996600
RSLGYGYVNYATPQDASR	1	Unmodified					_RSLGYGYVNYATPQDASR_							A0A178W710	PAB8	Polyadenylate-binding protein 8	U0	93.92	19625000
SGVGNIFIK	0	Unmodified					_SGVGNIFIK_							A0A178W710	PAB8	Polyadenylate-binding protein 8	U0	128.61	105050000
SGVGNIFIK	0	Unmodified					_SGVGNIFIK_							A0A178W710	PAB8	Polyadenylate-binding protein 8	U50	107.01	27088000
SGVGNIFIKNLDK	1	Unmodified					_SGVGNIFIKNLDK_							A0A178W710	PAB8	Polyadenylate-binding protein 8	U0	64.313	4740800
SKGFGFVNFENSDDAAR	1	Unmodified					_SKGFGFVNFENSDDAAR_							A0A178W710	PAB8	Polyadenylate-binding protein 8	U0	98.573	11148000
SKGFGFVNFENSDDAAR	1	Unmodified					_SKGFGFVNFENSDDAAR_							A0A178W710	PAB8	Polyadenylate-binding protein 8	U50	76.526	7206200
SLGYGYVNYATPQDASR	0	Unmodified					_SLGYGYVNYATPQDASR_							A0A178W710	PAB8	Polyadenylate-binding protein 8	U0	210.73	63700000
SLGYGYVNYATPQDASR	0	Unmodified					_SLGYGYVNYATPQDASR_							A0A178W710	PAB8	Polyadenylate-binding protein 8	U0	126.91	15276000
SLGYGYVNYATPQDASR	0	Unmodified					_SLGYGYVNYATPQDASR_							A0A178W710	PAB8	Polyadenylate-binding protein 8	U50	202.18	14372000
FTNVYVK	0	Unmodified					_FTNVYVK_							A0A178W710	PAB8;PAB3;PAB4;PAB2	Polyadenylate-binding protein 8;Polyadenylate-binding protein 3;Polyadenylate-binding protein 4;Polyadenylate-binding protein 2	U0	NaN	66056000
FTNVYVK	0	Unmodified					_FTNVYVK_							A0A178W710	PAB8;PAB3;PAB4;PAB2	Polyadenylate-binding protein 8;Polyadenylate-binding protein 3;Polyadenylate-binding protein 4;Polyadenylate-binding protein 2	U50	94.777	38322000
QKFDESALVPEDQFLAQHPGPATIR	1	Unmodified					_QKFDESALVPEDQFLAQHPGPATIR_							A0A178W732		Probable splicing factor 3A subunit 1	U50	65.213	2755100
GAASSVFIK	0	Unmodified					_GAASSVFIK_							A0A178W7L9	ISPF	2-C-methyl-D-erythritol 2,4-cyclodiphosphate synthase, chloroplastic	U0	87.323	48699000
GAASSVFIK	0	Unmodified					_GAASSVFIK_							A0A178W7L9	ISPF	2-C-methyl-D-erythritol 2,4-cyclodiphosphate synthase, chloroplastic	U50	NaN	74989000
GAASSVFIKEAVR	1	Unmodified					_GAASSVFIKEAVR_							A0A178W7L9	ISPF	2-C-methyl-D-erythritol 2,4-cyclodiphosphate synthase, chloroplastic	U0	76.073	12723000
GAASSVFIKEAVR	1	Unmodified					_GAASSVFIKEAVR_							A0A178W7L9	ISPF	2-C-methyl-D-erythritol 2,4-cyclodiphosphate synthase, chloroplastic	U0	NaN	3560000
GAASSVFIKEAVR	1	Unmodified					_GAASSVFIKEAVR_							A0A178W7L9	ISPF	2-C-methyl-D-erythritol 2,4-cyclodiphosphate synthase, chloroplastic	U50	90.793	41561000
GAASSVFIKEAVR	1	Unmodified					_GAASSVFIKEAVR_							A0A178W7L9	ISPF	2-C-methyl-D-erythritol 2,4-cyclodiphosphate synthase, chloroplastic	U50	150.04	9277400
ISPHKETIRSNLSK	2	Unmodified					_ISPHKETIRSNLSK_							A0A178W7L9	ISPF	2-C-methyl-D-erythritol 2,4-cyclodiphosphate synthase, chloroplastic	U0	NaN	157510
ISPHKETIRSNLSK	2	Unmodified					_ISPHKETIRSNLSK_							A0A178W7L9	ISPF	2-C-methyl-D-erythritol 2,4-cyclodiphosphate synthase, chloroplastic	U50	86.699	1955900
LLGADPSVVNLK	0	Unmodified					_LLGADPSVVNLK_							A0A178W7L9	ISPF	2-C-methyl-D-erythritol 2,4-cyclodiphosphate synthase, chloroplastic	U0	131.45	101760000
LLGADPSVVNLK	0	Unmodified					_LLGADPSVVNLK_							A0A178W7L9	ISPF	2-C-methyl-D-erythritol 2,4-cyclodiphosphate synthase, chloroplastic	U50	143.39	213130000
LLGADPSVVNLKAK	1	Unmodified					_LLGADPSVVNLKAK_							A0A178W7L9	ISPF	2-C-methyl-D-erythritol 2,4-cyclodiphosphate synthase, chloroplastic	U0	53.869	9583500
LLGADPSVVNLKAK	1	Unmodified					_LLGADPSVVNLKAK_							A0A178W7L9	ISPF	2-C-methyl-D-erythritol 2,4-cyclodiphosphate synthase, chloroplastic	U50	98	47042000
LLGADPSVVNLKAK	1	Unmodified					_LLGADPSVVNLKAK_							A0A178W7L9	ISPF	2-C-methyl-D-erythritol 2,4-cyclodiphosphate synthase, chloroplastic	U50	139.43	5847300
SIAAHTVILLMK	0	Unmodified					_SIAAHTVILLMK_							A0A178W7L9	ISPF	2-C-methyl-D-erythritol 2,4-cyclodiphosphate synthase, chloroplastic	U0	NaN	11239000
SIAAHTVILLMK	0	Unmodified					_SIAAHTVILLMK_							A0A178W7L9	ISPF	2-C-methyl-D-erythritol 2,4-cyclodiphosphate synthase, chloroplastic	U50	78.903	9353800
SIAAHTVILLMKK	1	Oxidation (M)				1	_SIAAHTVILLM(ox)KK_			SIAAHTVILLM(1)KK			SIAAHTVILLM(42.47)KK	A0A178W7L9	ISPF	2-C-methyl-D-erythritol 2,4-cyclodiphosphate synthase, chloroplastic	U0	42.469	9227100
SIAAHTVILLMKK	1	Unmodified					_SIAAHTVILLMKK_							A0A178W7L9	ISPF	2-C-methyl-D-erythritol 2,4-cyclodiphosphate synthase, chloroplastic	U0	74.15	25785000
SIAAHTVILLMKK	1	Unmodified					_SIAAHTVILLMKK_							A0A178W7L9	ISPF	2-C-methyl-D-erythritol 2,4-cyclodiphosphate synthase, chloroplastic	U0	NaN	2351700
SIAAHTVILLMKK	1	Oxidation (M)				1	_SIAAHTVILLM(ox)KK_			SIAAHTVILLM(1)KK			SIAAHTVILLM(70.62)KK	A0A178W7L9	ISPF	2-C-methyl-D-erythritol 2,4-cyclodiphosphate synthase, chloroplastic	U50	70.622	17171000
SIAAHTVILLMKK	1	Unmodified					_SIAAHTVILLMKK_							A0A178W7L9	ISPF	2-C-methyl-D-erythritol 2,4-cyclodiphosphate synthase, chloroplastic	U50	130.56	71564000
SIAAHTVILLMKK	1	Unmodified					_SIAAHTVILLMKK_							A0A178W7L9	ISPF	2-C-methyl-D-erythritol 2,4-cyclodiphosphate synthase, chloroplastic	U50	66.758	3808400
SLEGLPNKGSVR	1	Unmodified					_SLEGLPNKGSVR_							A0A178W8M2	At1g02475		U0	81.565	24421000
SLEGLPNKGSVR	1	Unmodified					_SLEGLPNKGSVR_							A0A178W8M2	At1g02475		U50	NaN	3644500
LWDLATGESTR	0	Unmodified					_LWDLATGESTR_							A0A178W908	RACK1B	Receptor for activated C kinase 1B	U0	155.42	26794000
LWDLATGESTR	0	Unmodified					_LWDLATGESTR_							A0A178W908	RACK1B	Receptor for activated C kinase 1B	U50	119.68	7175600
LWDLATGESTRR	1	Unmodified					_LWDLATGESTRR_							A0A178W908	RACK1B	Receptor for activated C kinase 1B	U0	138.45	59800000
LWDLATGESTRR	1	Unmodified					_LWDLATGESTRR_							A0A178W908	RACK1B	Receptor for activated C kinase 1B	U50	132.32	22763000
YTISEADGHKEWVSCVR	1	Unmodified					_YTISEADGHKEWVSCVR_							A0A178W908	RACK1B	Receptor for activated C kinase 1B	U0	65.949	13643000
DVLSVAFSTDNR	0	Unmodified					_DVLSVAFSTDNR_							A0A178W908	RACK1C;RACK1B	Receptor for activated C kinase 1C;Receptor for activated C kinase 1B	U0	197.27	14839000
DVLSVAFSTDNR	0	Unmodified					_DVLSVAFSTDNR_							A0A178W908	RACK1C;RACK1B	Receptor for activated C kinase 1C;Receptor for activated C kinase 1B	U50	197.27	6317300
SVVEDLKVDLK	1	Unmodified					_SVVEDLKVDLK_							A0A178W908	RACK1C;RACK1B	Receptor for activated C kinase 1C;Receptor for activated C kinase 1B	U0	68.536	12802000
[truncated: 2,739 more rows]

## Sheet: Proteins
Majority protein IDs	Protein names	Gene names	Razor + unique peptides	Fasta headers	Unique + razor sequence coverage [%]	Mol. weight [kDa]	Sequence length	Intensity U50	Intensity U0	Ratio U50/U0
Q8LEN1			1	tr|Q8LEN1|Q8LEN1_ARATH 14-3-3-like protein GF14 iota (General regulatory factor 12) OS=Arabidopsis thaliana PE=2 SV=1	4	28.84	253	176150000	0	+U only
A0A178UT56;O23144	Proton pump-interactor 1	PPI1	6	tr|A0A178UT56|A0A178UT56_ARATH PPI1 OS=Arabidopsis thaliana GN=AXX17_At4g31630 PE=4 SV=1;sp|O23144|PPI1_ARATH Proton pump-interactor 1 OS=Arabidopsis thaliana GN=PPI1 PE=1 SV=2	9.7	60.067	535	80129000	0	+U only
A0A178VK18;Q9FWA3	6-phosphogluconate dehydrogenase, decarboxylating 3		4	tr|A0A178VK18|A0A178VK18_ARATH 6-phosphogluconate dehydrogenase, decarboxylating OS=Arabidopsis thaliana GN=AXX17_At3g01580 PE=3 SV=1;sp|Q9FWA3|6GPD3_ARATH 6-phosphogluconate dehydrogenase, decarboxylating 3 OS=Arabidopsis thaliana GN=At3g02360 PE=2 SV=1	6.8	53.577	486	69085000	0	+U only
A0A178UWP1;Q9SMR2	Tubulin-folding cofactor C	TFCC	1	tr|A0A178UWP1|A0A178UWP1_ARATH TFC C OS=Arabidopsis thaliana GN=AXX17_At4g45350 PE=4 SV=1;sp|Q9SMR2|TBCC_ARATH Tubulin-folding cofactor C OS=Arabidopsis thaliana GN=TFCC PE=1 SV=1	7.1	37.754	340	67508000	0	+U only
F4K1R3		At5g48550	1	tr|F4K1R3|F4K1R3_ARATH F-box protein OS=Arabidopsis thaliana GN=At5g48550 PE=4 SV=1	3.3	49.488	427	66282000	0	+U only
Q9FMJ4;A0A178UBY4		At5g63290	1	tr|Q9FMJ4|Q9FMJ4_ARATH At5g63290 OS=Arabidopsis thaliana GN=At5g63290 PE=2 SV=1;tr|A0A178UBY4|A0A178UBY4_ARATH Uncharacterized protein OS=Arabidopsis thaliana GN=AXX17_At5g62870 PE=4 SV=1	2.3	54.046	484	64552000	0	+U only
A0A178WDM0;Q9LNC4	Transcription factor GTE4	GTE4	3	tr|A0A178WDM0|A0A178WDM0_ARATH GTE4 OS=Arabidopsis thaliana GN=AXX17_At1g05810 PE=4 SV=1;sp|Q9LNC4|GTE4_ARATH Transcription factor GTE4 OS=Arabidopsis thaliana GN=GTE4 PE=2 SV=1	4.3	84.094	766	36497000	0	+U only
Q56WJ4		At1g13440	1	tr|Q56WJ4|Q56WJ4_ARATH Putative glyceraldehyde-3-phosphate dehydrogenase OS=Arabidopsis thaliana GN=At1g13440 PE=2 SV=1	7.5	17.309	160	32152000	0	+U only
A0A178VW63;Q0WLM1;F4IVZ7;P10896	Ribulose bisphosphate carboxylase/oxygenase activase, chloroplastic	At2g39730;RCA	3	tr|A0A178VW63|A0A178VW63_ARATH RCA OS=Arabidopsis thaliana GN=AXX17_At2g36680 PE=4 SV=1;tr|Q0WLM1|Q0WLM1_ARATH Rubisco activase (Fragment) OS=Arabidopsis thaliana GN=At2g39730 PE=2 SV=1;tr|F4IVZ7|F4IVZ7_ARATH RCA OS=Arabidopsis thaliana GN=RCA PE=1 SV=1;sp	7.4	49.1	446	32081000	0	+U only
Q93XY1;Q9FJC2		MNC6.16	2	tr|Q93XY1|Q93XY1_ARATH At5g53620 OS=Arabidopsis thaliana GN=MNC6.16 PE=1 SV=1;tr|Q9FJC2|Q9FJC2_ARATH Putative uncharacterized protein OS=Arabidopsis thaliana PE=4 SV=1	3.7	76.316	682	30070000	0	+U only
F4HXP0;Q8RXE7	Probable ADP-ribosylation factor GTPase-activating protein AGD14	ZIGA4;AGD14	2	tr|F4HXP0|F4HXP0_ARATH Putative ADP-ribosylation factor GTPase-activating protein AGD14 OS=Arabidopsis thaliana GN=ZIGA4 PE=1 SV=1;sp|Q8RXE7|AGD14_ARATH Probable ADP-ribosylation factor GTPase-activating protein AGD14 OS=Arabidopsis thaliana GN=AGD14 PE=1	6.3	71.559	651	28956000	0	+U only
A0A178VBD5;Q9M8Z5;L7QIM1;L7QIE3;L7S4X6;L7S1D0;L7QIM2	Guanine nucleotide-binding protein-like NSN1	NSN1	2	tr|A0A178VBD5|A0A178VBD5_ARATH NSN1 OS=Arabidopsis thaliana GN=AXX17_At3g06960 PE=4 SV=1;sp|Q9M8Z5|NSN1_ARATH Guanine nucleotide-binding protein-like NSN1 OS=Arabidopsis thaliana GN=NSN1 PE=1 SV=1;tr|L7QIM1|L7QIM1_ARATH NSN1 (Fragment) OS=Arabidopsis thali	3.8	65.785	582	26665000	0	+U only
A0A178W5G8;Q9SSM4;A0A178W857;Q8LE58	ESCRT-related protein CHMP1B;ESCRT-related protein CHMP1A	CHMP1B;CHMP1A	2	tr|A0A178W5G8|A0A178W5G8_ARATH VPS46.2 OS=Arabidopsis thaliana GN=AXX17_At1g67220 PE=3 SV=1;sp|Q9SSM4|CHM1B_ARATH ESCRT-related protein CHMP1B OS=Arabidopsis thaliana GN=CHMP1B PE=1 SV=1;tr|A0A178W857|A0A178W857_ARATH VPS46.1 OS=Arabidopsis thaliana GN=AXX	10.3	22.691	203	24255000	0	+U only
A0A178V7F4;Q9SCL7	Acetylglutamate kinase, chloroplastic	NAGK	3	tr|A0A178V7F4|A0A178V7F4_ARATH NAGK OS=Arabidopsis thaliana GN=AXX17_At3g52130 PE=3 SV=1;sp|Q9SCL7|NAGK_ARATH Acetylglutamate kinase, chloroplastic OS=Arabidopsis thaliana GN=NAGK PE=1 SV=1	12.1	36.595	347	24069000	0	+U only
F4K5Y6;A0A178UK42;F4K5Y4;Q9FHR5;F4K5Y5		At5g43310	3	tr|F4K5Y6|F4K5Y6_ARATH COP1-interacting protein-like protein OS=Arabidopsis thaliana GN=At5g43310 PE=1 SV=1;tr|A0A178UK42|A0A178UK42_ARATH Uncharacterized protein OS=Arabidopsis thaliana GN=AXX17_At5g41310 PE=4 SV=1;tr|F4K5Y4|F4K5Y4_ARATH COP1-interacting	2.9	128.83	1164	23751000	0	+U only
A0A178V2Y1;A0A178V2H7;Q0WNW7;Q9SWH4	Syntaxin-42	At4g02195;SYP42	1	tr|A0A178V2Y1|A0A178V2Y1_ARATH TLG2B OS=Arabidopsis thaliana GN=AXX17_At4g02790 PE=4 SV=1;tr|A0A178V2H7|A0A178V2H7_ARATH TLG2B OS=Arabidopsis thaliana GN=AXX17_At4g02790 PE=4 SV=1;tr|Q0WNW7|Q0WNW7_ARATH TLG2B OS=Arabidopsis thaliana GN=At4g02195 PE=2 SV=1;	6	18.678	167	20957000	0	+U only
A0A178UE63;Q9FI56	Chaperone protein ClpC1, chloroplastic	CLPC1	2	tr|A0A178UE63|A0A178UE63_ARATH HSP93-V OS=Arabidopsis thaliana GN=AXX17_At5g49710 PE=3 SV=1;sp|Q9FI56|CLPC1_ARATH Chaperone protein ClpC1, chloroplastic OS=Arabidopsis thaliana GN=CLPC1 PE=1 SV=1	1.2	103.45	929	18469000	0	+U only
A0A178UDQ4;O65282	20 kDa chaperonin, chloroplastic	CPN21	2	tr|A0A178UDQ4|A0A178UDQ4_ARATH CPN21 OS=Arabidopsis thaliana GN=AXX17_At5g20700 PE=3 SV=1;sp|O65282|CH20_ARATH 20 kDa chaperonin, chloroplastic OS=Arabidopsis thaliana GN=CPN20 PE=1 SV=2	14.2	26.802	253	15765000	0	+U only
Q56ZI6;Q9SSJ0;Q9C5Y9;A0A178VCB8;F4J6A1	Eukaryotic translation initiation factor 3 subunit G	At3g11400;F24K9.7;EIF3G1	1	tr|Q56ZI6|Q56ZI6_ARATH Eukaryotic translation initiation factor 3 subunit like protein OS=Arabidopsis thaliana GN=At3g11400 PE=2 SV=1;tr|Q9SSJ0|Q9SSJ0_ARATH Eukaryotic translation initiation factor 3 subunit G OS=Arabidopsis thaliana GN=F24K9.7 PE=2 SV=1;t	9	10.275	89	15527000	0	+U only
Q9FFP6;Q0WN17;Q9FNN1	Pyruvate kinase	At5g63680;At5g08570	2	tr|Q9FFP6|Q9FFP6_ARATH Pyruvate kinase OS=Arabidopsis thaliana GN=At5g63680 PE=3 SV=1;tr|Q0WN17|Q0WN17_ARATH Pyruvate kinase OS=Arabidopsis thaliana GN=At5g63680 PE=2 SV=1;tr|Q9FNN1|Q9FNN1_ARATH Pyruvate kinase OS=Arabidopsis thaliana GN=At5g08570 PE=2 SV=	3.7	55.017	510	14039000	0	+U only
Q8LC65;Q9LZT4	Expansin-like A1	EXLA1	1	tr|Q8LC65|Q8LC65_ARATH EXPL1 OS=Arabidopsis thaliana GN=AXX17_At3g39840 PE=2 SV=1;sp|Q9LZT4|EXLA1_ARATH Expansin-like A1 OS=Arabidopsis thaliana GN=EXLA1 PE=2 SV=1	5.3	28.718	265	13781000	0	+U only
A0A178VKK0;Q8W4D0	Peptidyl-prolyl cis-trans isomerase CYP71	CYP71	1	tr|A0A178VKK0|A0A178VKK0_ARATH CYP71 OS=Arabidopsis thaliana GN=AXX17_At3g38100 PE=4 SV=1;sp|Q8W4D0|CPY71_ARATH Peptidyl-prolyl cis-trans isomerase CYP71 OS=Arabidopsis thaliana GN=CYP71 PE=1 SV=1	1.6	70.949	631	12246000	0	+U only
A0A178VTN0;A0A178VWG9;A0A178VTI3;F4IHS2	Chromatin structure-remodeling complex protein SYD	SYD	2	tr|A0A178VTN0|A0A178VTN0_ARATH SYD OS=Arabidopsis thaliana GN=AXX17_At2g24310 PE=4 SV=1;tr|A0A178VWG9|A0A178VWG9_ARATH SYD OS=Arabidopsis thaliana GN=AXX17_At2g24310 PE=4 SV=1;tr|A0A178VTI3|A0A178VTI3_ARATH SYD OS=Arabidopsis thaliana GN=AXX17_At2g24310 PE	0.8	386.41	3543	11231000	0	+U only
A8MRW5;O65423;B9DGL1		At4g21580;F18E5.200	2	tr|A8MRW5|A8MRW5_ARATH Oxidoreductase, zinc-binding dehydrogenase family protein OS=Arabidopsis thaliana GN=At4g21580 PE=4 SV=1;tr|O65423|O65423_ARATH AT4g21580/F18E5_200 OS=Arabidopsis thaliana GN=F18E5.200 PE=2 SV=1;tr|B9DGL1|B9DGL1_ARATH AT4G21580 prote	8.8	33.835	319	10569000	0	+U only
Q9STW7;Q8S9I9;F4JQ74;A0A178UXQ4;F4JQ75;A0A178UYW1		T22A6.100;EMB140	1	tr|Q9STW7|Q9STW7_ARATH Putative uncharacterized protein AT4g24270 OS=Arabidopsis thaliana GN=T22A6.100 PE=4 SV=1;tr|Q8S9I9|Q8S9I9_ARATH AT4g24270/T22A6_100 OS=Arabidopsis thaliana PE=2 SV=1;tr|F4JQ74|F4JQ74_ARATH Protein embryo defective 140 OS=Arabidopsis	1.6	87.171	768	10268000	0	+U only
Q9M1L9		F18P9_20	1	tr|Q9M1L9|Q9M1L9_ARATH DNA topoisomerase OS=Arabidopsis thaliana GN=F18P9_20 PE=2 SV=1	3	39.913	372	8233000	0	+U only
A0A178VSZ7;A0A178VUK5;Q8LPQ9	Flowering time control protein FPA	FPA	1	tr|A0A178VSZ7|A0A178VSZ7_ARATH FPA OS=Arabidopsis thaliana GN=AXX17_At2g40900 PE=4 SV=1;tr|A0A178VUK5|A0A178VUK5_ARATH FPA OS=Arabidopsis thaliana GN=AXX17_At2g40900 PE=4 SV=1;sp|Q8LPQ9|FPA_ARATH Flowering time control protein FPA OS=Arabidopsis thaliana G	1.7	99.613	901	7927300	0	+U only
O49570		At4g31200	1	tr|O49570|O49570_ARATH At4g31200 OS=Arabidopsis thaliana GN=At4g31200 PE=2 SV=1	2.6	72.496	650	7173600	0	+U only
A0A178UX37;Q9SUT5	Protein SGT1 homolog B	SGT1B	1	tr|A0A178UX37|A0A178UX37_ARATH SGT1B OS=Arabidopsis thaliana GN=AXX17_At4g12690 PE=4 SV=1;sp|Q9SUT5|SGT1B_ARATH Protein SGT1 homolog B OS=Arabidopsis thaliana GN=SGT1B PE=1 SV=1	4.7	39.762	358	6998000	0	+U only
Q9C6J7;A0A178WI31;A0MEC1		F8A12.6	1	tr|Q9C6J7|Q9C6J7_ARATH Aminotransferase-like, plant mobile domain family protein OS=Arabidopsis thaliana GN=F8A12.6 PE=4 SV=1;tr|A0A178WI31|A0A178WI31_ARATH Uncharacterized protein OS=Arabidopsis thaliana GN=AXX17_At1g45020 PE=4 SV=1;tr|A0MEC1|A0MEC1_ARATH	2.3	60.468	528	6833000	0	+U only
A0A178VV29;Q9ZNU9	Zinc finger A20 and AN1 domain-containing stress-associated protein 3	SAP3	1	tr|A0A178VV29|A0A178VV29_ARATH Uncharacterized protein OS=Arabidopsis thaliana GN=AXX17_At2g23580 PE=4 SV=1;sp|Q9ZNU9|SAP3_ARATH Zinc finger A20 and AN1 domain-containing stress-associated protein 3 OS=Arabidopsis thaliana GN=SAP3 PE=2 SV=1	10.4	17.877	163	5954200	0	+U only
Q9SUF6;A0A178UUB3			1	tr|Q9SUF6|Q9SUF6_ARATH At4g08240 OS=Arabidopsis thaliana GN=At4g08240 PE=2 SV=1;tr|A0A178UUB3|A0A178UUB3_ARATH Uncharacterized protein OS=Arabidopsis thaliana GN=AXX17_At4g09280 PE=4 SV=1	8.1	14.557	136	5769700	0	+U only
A0A178VAG3;Q9ZPI1	Lysine--tRNA ligase		1	tr|A0A178VAG3|A0A178VAG3_ARATH Lysine--tRNA ligase OS=Arabidopsis thaliana GN=AXX17_At3g11640 PE=3 SV=1;sp|Q9ZPI1|SYKC_ARATH Lysine--tRNA ligase, cytoplasmic OS=Arabidopsis thaliana GN=At3g11710 PE=1 SV=1	2.1	70.887	626	5517700	0	+U only
A0A178V0H0;Q84WW5	Vesicle-associated protein 1-3;Vesicle-associated protein 1-3, N-terminally processed	PVA13	1	tr|A0A178V0H0|A0A178V0H0_ARATH Uncharacterized protein OS=Arabidopsis thaliana GN=AXX17_At4g00210 PE=4 SV=1;sp|Q84WW5|VAP13_ARATH Vesicle-associated protein 1-3 OS=Arabidopsis thaliana GN=PVA13 PE=2 SV=1	3.8	26.374	239	5446100	0	+U only
A0A178VEY8;Q8VZ95;A0A178W0Q8;Q9SHC8	Vesicle-associated protein 1-1;Vesicle-associated protein 1-1, N-terminally processed;Vesicle-associated protein 1-2;Vesicle-associated protein 1-2, N-terminally processed	PVA11;PVA12	2	tr|A0A178VEY8|A0A178VEY8_ARATH VAP27-1 OS=Arabidopsis thaliana GN=AXX17_At3g54990 PE=4 SV=1;sp|Q8VZ95|VAP11_ARATH Vesicle-associated protein 1-1 OS=Arabidopsis thaliana GN=PVA11 PE=1 SV=1;tr|A0A178W0Q8|A0A178W0Q8_ARATH PVA12 OS=Arabidopsis thaliana GN=AXX1	8.2	28.472	256	5414900	0	+U only
A0A178WAT3;P52422	Phosphoribosylglycinamide formyltransferase, chloroplastic	PUR3	1	tr|A0A178WAT3|A0A178WAT3_ARATH Uncharacterized protein OS=Arabidopsis thaliana GN=AXX17_At1g31840 PE=3 SV=1;sp|P52422|PUR3_ARATH Phosphoribosylglycinamide formyltransferase, chloroplastic OS=Arabidopsis thaliana GN=PUR3 PE=2 SV=2	4.5	32.204	292	5400900	0	+U only
A0A178W4G6;A0A178WAH9;Q9SX79;Q9SX80	Polyadenylate-binding protein RBP47C;Polyadenylate-binding protein RBP47C	RBP47C;RBP47C	1	tr|A0A178W4G6|A0A178W4G6_ARATH RBP47C OS=Arabidopsis thaliana GN=AXX17_At1g41510 PE=4 SV=1;tr|A0A178WAH9|A0A178WAH9_ARATH RBP47C OS=Arabidopsis thaliana GN=AXX17_At1g41530 PE=4 SV=1;sp|Q9SX79|RB47C_ARATH Polyadenylate-binding protein RBP47C OS=Arabidopsis	3	48.456	432	5317500	0	+U only
Q8L7M3;Q9LT05_ARATHDbj		At5g23590	1	tr|Q8L7M3|Q8L7M3_ARATH At5g23590 OS=Arabidopsis thaliana GN=At5g23590 PE=2 SV=1;tr|Q9LT05|Q9LT05_ARATH Dbj|BAA91724.1 OS=Arabidopsis thaliana PE=4 SV=1	3.4	33.49	296	5283200	0	+U only
A0A178VI07;A0A178VHQ9;Q9LK22	Plant UBX domain-containing protein 1	PUX1	1	tr|A0A178VI07|A0A178VI07_ARATH PUX1 OS=Arabidopsis thaliana GN=AXX17_At3g29770 PE=4 SV=1;tr|A0A178VHQ9|A0A178VHQ9_ARATH PUX1 OS=Arabidopsis thaliana GN=AXX17_At3g29770 PE=4 SV=1;sp|Q9LK22|PUX1_ARATH Plant UBX domain-containing protein 1 OS=Arabidopsis thal	7.8	24.7	217	5086200	0	+U only
A0A178UVS2;A0A178V1N9;Q8LFC0;O81796	Isocitrate dehydrogenase [NAD] regulatory subunit 1, mitochondrial;Isocitrate dehydrogenase [NAD] regulatory subunit 3, mitochondrial	IDH1;IDH3	1	tr|A0A178UVS2|A0A178UVS2_ARATH IDH1 OS=Arabidopsis thaliana GN=AXX17_At4g40290 PE=3 SV=1;tr|A0A178V1N9|A0A178V1N9_ARATH IDH-III OS=Arabidopsis thaliana GN=AXX17_At4g40700 PE=3 SV=1;sp|Q8LFC0|IDH1_ARATH Isocitrate dehydrogenase [NAD] regulatory subunit 1, m	3	39.626	367	4766900	0	+U only
Q94BS1;F4IXI9;Q9LU30		At3g21290	1	tr|Q94BS1|Q94BS1_ARATH Putative uncharacterized protein At3g21290 OS=Arabidopsis thaliana GN=At3g21290 PE=2 SV=1;tr|F4IXI9|F4IXI9_ARATH Dentin sialophosphoprotein-like protein OS=Arabidopsis thaliana GN=At3g21290 PE=1 SV=1;tr|Q9LU30|Q9LU30_ARATH Uncharacte	0.9	130.78	1192	4079300	0	+U only
A0A178VCU6;F4J6K6;Q9LK09	Syntaxin-32	SYP32	1	tr|A0A178VCU6|A0A178VCU6_ARATH SYP32 OS=Arabidopsis thaliana GN=AXX17_At3g26340 PE=3 SV=1;tr|F4J6K6|F4J6K6_ARATH Syntaxin-32 OS=Arabidopsis thaliana GN=SYP32 PE=3 SV=1;sp|Q9LK09|SYP32_ARATH Syntaxin-32 OS=Arabidopsis thaliana GN=SYP32 PE=2 SV=1	4	39.119	347	3939800	0	+U only
F4J563;A0A178VLU0;Q9LRP1	Novel plant SNARE 13	NPSN13	1	tr|F4J563|F4J563_ARATH Novel plant snare 13 OS=Arabidopsis thaliana GN=NPSN13 PE=1 SV=1;tr|A0A178VLU0|A0A178VLU0_ARATH NPSN13 OS=Arabidopsis thaliana GN=AXX17_At3g18400 PE=4 SV=1;sp|Q9LRP1|NPS13_ARATH Novel plant SNARE 13 OS=Arabidopsis thaliana GN=NPSN13	5.6	24.537	216	3816400	0	+U only
A0A178VU53;F4III4;Q9SJ12	Probable ATP synthase 24 kDa subunit, mitochondrial	MGP1	1	tr|A0A178VU53|A0A178VU53_ARATH MGP1 OS=Arabidopsis thaliana GN=AXX17_At2g17430 PE=4 SV=1;tr|F4III4|F4III4_ARATH Mitochondrial F1F0-ATP synthase subunit Fad OS=Arabidopsis thaliana GN=MGP1 PE=4 SV=1;sp|Q9SJ12|ATP7_ARATH Probable ATP synthase 24 kDa subunit,	8.2	22.598	195	3284800	0	+U only
Q9LPL6		F24J8.3	1	tr|Q9LPL6|Q9LPL6_ARATH F24J8.3 protein OS=Arabidopsis thaliana GN=F24J8.3 PE=1 SV=1	2	55.791	506	3078200	0	+U only
A0A178V1X0;O23254	Serine hydroxymethyltransferase 4	SHM4	1	tr|A0A178V1X0|A0A178V1X0_ARATH Serine hydroxymethyltransferase OS=Arabidopsis thaliana GN=AXX17_At4g15890 PE=3 SV=1;sp|O23254|GLYC4_ARATH Serine hydroxymethyltransferase 4 OS=Arabidopsis thaliana GN=SHM4 PE=1 SV=1	1.9	51.717	471	2994100	0	+U only
O81506		T7M24.7	1	tr|O81506|O81506_ARATH Putative retrotransposon protein OS=Arabidopsis thaliana GN=T7M24.7 PE=4 SV=1	1.2	110.44	964	2889100	0	+U only
A0A178W732;Q8RXF1	Probable splicing factor 3A subunit 1		1	tr|A0A178W732|A0A178W732_ARATH Uncharacterized protein OS=Arabidopsis thaliana GN=AXX17_At1g15260 PE=4 SV=1;sp|Q8RXF1|SF3A1_ARATH Probable splicing factor 3A subunit 1 OS=Arabidopsis thaliana GN=At1g14650 PE=1 SV=2	3.2	87.593	785	2755100	0	+U only
Q9SRT8;Q8GW67;A0A178VB99		F14P3.13;At3g02220/F14P3_13	1	tr|Q9SRT8|Q9SRT8_ARATH Putative uncharacterized protein F14P3.13 OS=Arabidopsis thaliana GN=F14P3.13 PE=1 SV=1;tr|Q8GW67|Q8GW67_ARATH At3g02220 OS=Arabidopsis thaliana GN=At3g02220/F14P3_13 PE=2 SV=1;tr|A0A178VB99|A0A178VB99_ARATH Uncharacterized protein O	5.7	25.615	227	2612800	0	+U only
A0A178UT42;Q39258	V-type proton ATPase subunit E1	VHA-E1	1	tr|A0A178UT42|A0A178UT42_ARATH Uncharacterized protein OS=Arabidopsis thaliana GN=AXX17_At4g12560 PE=4 SV=1;sp|Q39258|VATE1_ARATH V-type proton ATPase subunit E1 OS=Arabidopsis thaliana GN=VHA-E1 PE=1 SV=2	11.3	17.588	159	1836400	0	+U only
A0A178VFL2;A0A178VDF1;Q0WV85;Q9M8Y0	Probable UDP-N-acetylglucosamine--peptide N-acetylglucosaminyltransferase SEC	SEC	1	tr|A0A178VFL2|A0A178VFL2_ARATH SEC OS=Arabidopsis thaliana GN=AXX17_At3g03670 PE=4 SV=1;tr|A0A178VDF1|A0A178VDF1_ARATH SEC OS=Arabidopsis thaliana GN=AXX17_At3g03670 PE=4 SV=1;tr|Q0WV85|Q0WV85_ARATH Glycosyltransferase OS=Arabidopsis thaliana GN=At3g04240	1.3	83.888	744	1424000	0	+U only
Q94AJ9;Q9LPW9		At1g12800;F13K23.5	1	tr|Q94AJ9|Q94AJ9_ARATH Nucleic acid-binding, OB-fold-like protein OS=Arabidopsis thaliana GN=At1g12800 PE=2 SV=1;tr|Q9LPW9|Q9LPW9_ARATH F13K23.5 protein OS=Arabidopsis thaliana GN=F13K23.5 PE=4 SV=1	1.3	85.667	767	1102000	0	+U only
B3H7E2;O23060;Q84JN8;F4JHB3;A0A178V4H5;A0A178V2L4		At4g00420;A_IG005I10.3	1	tr|B3H7E2|B3H7E2_ARATH Double-stranded RNA-binding domain (DsRBD)-containing protein OS=Arabidopsis thaliana GN=At4g00420 PE=4 SV=1;tr|O23060|O23060_ARATH A_IG005I10.3 protein OS=Arabidopsis thaliana GN=A_IG005I10.3 PE=4 SV=1;tr|Q84JN8|Q84JN8_ARATH Double-	7.7	19.192	168	991910	0	+U only
A0A178UD67;Q9FFS8;A8MRV0	40S ribosomal protein S10-2	RPS10B;At5g41520	5	tr|A0A178UD67|A0A178UD67_ARATH RPS10B OS=Arabidopsis thaliana GN=AXX17_At5g39280 PE=4 SV=1;sp|Q9FFS8|RS102_ARATH 40S ribosomal protein S10-2 OS=Arabidopsis thaliana GN=RPS10B PE=2 SV=1;tr|A8MRV0|A8MRV0_ARATH 40S ribosomal protein S10-2 OS=Arabidopsis thali	30	19.733	180	104950000	510570	205.555
A0A178W9S3;Q8GYB8	12-oxophytodienoate reductase 2	OPR2	5	tr|A0A178W9S3|A0A178W9S3_ARATH OPR2 OS=Arabidopsis thaliana GN=AXX17_At1g71170 PE=4 SV=1;sp|Q8GYB8|OPR2_ARATH 12-oxophytodienoate reductase 2 OS=Arabidopsis thaliana GN=OPR2 PE=1 SV=2	15	41.567	374	142870000	1387700	102.955
Q9C685		F23H24.6	3	tr|Q9C685|Q9C685_ARATH At1g51100 OS=Arabidopsis thaliana GN=F23H24.6 PE=2 SV=1	18.5	24.161	211	33286000	635540	52.3744
A0A178UTL0;Q5PNU3	AMSH-like ubiquitin thioesterase 3	AMSH3	4	tr|A0A178UTL0|A0A178UTL0_ARATH AMSH3 OS=Arabidopsis thaliana GN=AXX17_At4g18930 PE=4 SV=1;sp|Q5PNU3|AMSH3_ARATH AMSH-like ubiquitin thioesterase 3 OS=Arabidopsis thaliana GN=AMSH3 PE=1 SV=2	8.9	57.167	507	53784000	1698900	31.6581
A0A178VVJ8;Q84JU4	Protein-tyrosine-phosphatase IBR5	IBR5	5	tr|A0A178VVJ8|A0A178VVJ8_ARATH IBR5 OS=Arabidopsis thaliana GN=AXX17_At2g03700 PE=4 SV=1;sp|Q84JU4|IBR5_ARATH Protein-tyrosine-phosphatase IBR5 OS=Arabidopsis thaliana GN=IBR5 PE=1 SV=1	18.7	28.69	257	116930000	4407200	26.5316
A2RVT9;A0A178UD11;Q9FMB3		At5g38890	5	tr|A2RVT9|A2RVT9_ARATH AT5G38890 protein OS=Arabidopsis thaliana GN=At5g38890 PE=1 SV=1;tr|A0A178UD11|A0A178UD11_ARATH Uncharacterized protein OS=Arabidopsis thaliana GN=AXX17_At5g36260 PE=4 SV=1;tr|Q9FMB3|Q9FMB3_ARATH Putative uncharacterized protein OS=A	31.4	20.232	191	159590000	7319500	21.8034
A0A178WL22;Q9SE96	GEM-like protein 1	FIP1	3	tr|A0A178WL22|A0A178WL22_ARATH FIP1 OS=Arabidopsis thaliana GN=AXX17_At1g28600 PE=4 SV=1;sp|Q9SE96|GEML1_ARATH GEM-like protein 1 OS=Arabidopsis thaliana GN=FIP1 PE=1 SV=1	13.5	27.958	259	76521000	3566600	21.4549
A0A178VD60;Q9LHH7	Bifunctional protein FolD 2;Methylenetetrahydrofolate dehydrogenase;Methenyltetrahydrofolate cyclohydrolase	FOLD2	7	tr|A0A178VD60|A0A178VD60_ARATH Uncharacterized protein OS=Arabidopsis thaliana GN=AXX17_At3g12320 PE=3 SV=1;sp|Q9LHH7|FOLD2_ARATH Bifunctional protein FolD 2 OS=Arabidopsis thaliana GN=FOLD2 PE=2 SV=1	21.1	31.566	299	86025000	4763000	18.0611
A0A178UX02;Q9SDY5	NEDD8-conjugating enzyme Ubc12	RCE1	5	tr|A0A178UX02|A0A178UX02_ARATH RCE1 OS=Arabidopsis thaliana GN=AXX17_At4g41910 PE=3 SV=1;sp|Q9SDY5|RCE1_ARATH NEDD8-conjugating enzyme Ubc12 OS=Arabidopsis thaliana GN=RCE1 PE=1 SV=1	14.1	20.786	184	299350000	16627000	18.0038
Q9C9A0		F23N20.7	2	tr|Q9C9A0|Q9C9A0_ARATH At1g71080/F23N20_7 OS=Arabidopsis thaliana GN=F23N20.7 PE=1 SV=1	8	34.831	326	18473000	1034600	17.8552
A0A178VZ34;Q67YI9	Clathrin interactor EPSIN 2	EPSIN2	5	tr|A0A178VZ34|A0A178VZ34_ARATH Uncharacterized protein OS=Arabidopsis thaliana GN=AXX17_At2g40640 PE=4 SV=1;sp|Q67YI9|EPN2_ARATH Clathrin interactor EPSIN 2 OS=Arabidopsis thaliana GN=EPSIN2 PE=1 SV=1	8	95.489	895	160440000	9786000	16.3948
Q8GW56;A0A178VR92;Q9ZPR2;F4IT98;F4ITA0		At2g03640	2	tr|Q8GW56|Q8GW56_ARATH At2g03640 OS=Arabidopsis thaliana GN=At2g03640 PE=2 SV=1;tr|A0A178VR92|A0A178VR92_ARATH Uncharacterized protein OS=Arabidopsis thaliana GN=AXX17_At2g02610 PE=4 SV=1;tr|Q9ZPR2|Q9ZPR2_ARATH Nuclear transport factor 2 and RNA recognitio	6.4	46.131	422	17529000	1087000	16.126
A0A178V898;O82089	Copper transport protein CCH	CCH	14	tr|A0A178V898|A0A178V898_ARATH CCH OS=Arabidopsis thaliana GN=AXX17_At3g50880 PE=4 SV=1;sp|O82089|CCH_ARATH Copper transport protein CCH OS=Arabidopsis thaliana GN=CCH PE=1 SV=1	81.8	12.971	121	859740000	55715000	15.431
B9DFB7;Q93W03;F4IY77;Q9LYM8		At3g56130;F18O21_90	4	tr|B9DFB7|B9DFB7_ARATH AT3G56130 protein OS=Arabidopsis thaliana GN=At3g56130 PE=2 SV=1;tr|Q93W03|Q93W03_ARATH AT3g56130/F18O21_90 OS=Arabidopsis thaliana GN=At3g56130 PE=2 SV=1;tr|F4IY77|F4IY77_ARATH Biotin/lipoyl attachment domain-containing protein OS=A	30.2	21.781	205	29894000	2084400	14.3418
Q9LI88;Q94BT7;A0A178V881		GHS1	1	tr|Q9LI88|Q9LI88_ARATH Plastid ribosomal protein S21 OS=Arabidopsis thaliana GN=GHS1 PE=3 SV=1;tr|Q94BT7|Q94BT7_ARATH AT3g27160/MYF5_3 OS=Arabidopsis thaliana PE=2 SV=1;tr|A0A178V881|A0A178V881_ARATH GHS1 OS=Arabidopsis thaliana GN=AXX17_At3g29590 PE=3 SV=	7.7	20.911	183	19024000	1329300	14.3113
Q9ZQ80;A0A178VZB6		NRP1	4	sp|Q9ZQ80|NDRP1_ARATH Nodulin-related protein 1 OS=Arabidopsis thaliana GN=NRP1 PE=1 SV=1;tr|A0A178VZB6|A0A178VZB6_ARATH NRP1 OS=Arabidopsis thaliana GN=AXX17_At2g02430 PE=4 SV=1	24.1	19.7	187	161630000	11753000	13.7522
A0A178VZ67;Q39244	U1 small nuclear ribonucleoprotein A	U1A	4	tr|A0A178VZ67|A0A178VZ67_ARATH U1A OS=Arabidopsis thaliana GN=AXX17_At2g45370 PE=4 SV=1;sp|Q39244|RU1A_ARATH U1 small nuclear ribonucleoprotein A OS=Arabidopsis thaliana GN=U1A PE=1 SV=1	19.2	28.074	250	61455000	4511300	13.6225
F4JF64;A0A178VA06;Q9SXJ7	Chaperone protein ClpC2, chloroplastic	HSP93-III;CLPC2	10	tr|F4JF64|F4JF64_ARATH Clp ATPase OS=Arabidopsis thaliana GN=HSP93-III PE=3 SV=1;tr|A0A178VA06|A0A178VA06_ARATH HSP93-III OS=Arabidopsis thaliana GN=AXX17_At3g43020 PE=3 SV=1;sp|Q9SXJ7|CLPC2_ARATH Chaperone protein ClpC2, chloroplastic OS=Arabidopsis thali	10.1	102.24	921	533230000	40226000	13.2559
Q8L9F4;F4K329		At5g42765	2	tr|Q8L9F4|Q8L9F4_ARATH Putative uncharacterized protein OS=Arabidopsis thaliana GN=At5g42765 PE=2 SV=1;tr|F4K329|F4K329_ARATH Uncharacterized protein OS=Arabidopsis thaliana GN=At5g42765 PE=4 SV=1	8.3	25.147	229	40662000	3240500	12.5481
Q8L745;A0A178UAN0;Q9FH07		At5g42220	1	tr|Q8L745|Q8L745_ARATH AT5g42220/K5J14_2 OS=Arabidopsis thaliana GN=At5g42220 PE=2 SV=1;tr|A0A178UAN0|A0A178UAN0_ARATH Uncharacterized protein OS=Arabidopsis thaliana GN=AXX17_At5g40020 PE=4 SV=1;tr|Q9FH07|Q9FH07_ARATH Putative uncharacterized protein OS=A	1.5	92.553	879	31803000	2652900	11.988
O65655;A0A178V0X9		At4g39680	2	tr|O65655|O65655_ARATH Putative uncharacterized protein AT4g39680 OS=Arabidopsis thaliana GN=At4g39680 PE=1 SV=1;tr|A0A178V0X9|A0A178V0X9_ARATH Uncharacterized protein OS=Arabidopsis thaliana GN=AXX17_At4g45060 PE=4 SV=1	3.3	69.441	633	7226300	608250	11.8805
F4JXE7;B3H4K4;F4JXE5;A0A178UAK2;F4JXE3;Q8L773	THO complex subunit 4A	At5g59950;ALY1	3	tr|F4JXE7|F4JXE7_ARATH RNA recognition motif-containing protein OS=Arabidopsis thaliana GN=At5g59950 PE=4 SV=1;tr|B3H4K4|B3H4K4_ARATH RNA recognition motif-containing protein OS=Arabidopsis thaliana GN=At5g59950 PE=1 SV=1;tr|F4JXE5|F4JXE5_ARATH RNA recogni	16.9	18.887	178	29485000	2495700	11.8143
O23722;A0A178VRG6		MVD1	5	sp|O23722|MVD1_ARATH Diphosphomevalonate decarboxylase MVD1, peroxisomal OS=Arabidopsis thaliana GN=MVD1 PE=1 SV=1;tr|A0A178VRG6|A0A178VRG6_ARATH Diphosphomevalonate decarboxylase OS=Arabidopsis thaliana GN=AXX17_At2g35580 PE=3 SV=1	13.8	45.585	412	126080000	11747000	10.733
Q9XI93;Q8LEH5		F7A19.2	2	tr|Q9XI93|Q9XI93_ARATH At1g13930/F16A14.27 OS=Arabidopsis thaliana GN=F7A19.2 PE=1 SV=1;tr|Q8LEH5|Q8LEH5_ARATH Putative uncharacterized protein OS=Arabidopsis thaliana PE=2 SV=1	16.8	16.163	155	17921000	1672500	10.7151
Q8L768;Q9C9R7;F4IA48		At1g78150;T11I11.9	9	tr|Q8L768|Q8L768_ARATH AT1G78150 protein OS=Arabidopsis thaliana GN=At1g78150 PE=1 SV=1;tr|Q9C9R7|Q9C9R7_ARATH Putative uncharacterized protein T11I11.9 OS=Arabidopsis thaliana GN=T11I11.9 PE=4 SV=1;tr|F4IA48|F4IA48_ARATH Uncharacterized protein OS=Arabido	35.8	29.679	274	271890000	26204000	10.3759
A0A178VBE4;A0A178VAB5;Q9SR13	Flowering locus K homology domain	FLK	1	tr|A0A178VBE4|A0A178VBE4_ARATH FLK OS=Arabidopsis thaliana GN=AXX17_At3g04060 PE=4 SV=1;tr|A0A178VAB5|A0A178VAB5_ARATH FLK OS=Arabidopsis thaliana GN=AXX17_At3g04060 PE=4 SV=1;sp|Q9SR13|FLK_ARATH Flowering locus K homology domain OS=Arabidopsis thaliana GN	3.8	36.61	343	10939000	1139100	9.6032
Q8RXZ8;Q9SR63		At3g09980;T22K18.21	8	tr|Q8RXZ8|Q8RXZ8_ARATH At3g09980 OS=Arabidopsis thaliana GN=At3g09980 PE=1 SV=1;tr|Q9SR63|Q9SR63_ARATH Putative uncharacterized protein T22K18.21 OS=Arabidopsis thaliana GN=T22K18.21 PE=4 SV=1	43.8	20.588	178	772110000	87976000	8.77637
Q9C7X4;Q5XF05;F4I546		F13N6.2;At1g56440	2	tr|Q9C7X4|Q9C7X4_ARATH Putative uncharacterized protein F13N6.2 OS=Arabidopsis thaliana GN=F13N6.2 PE=4 SV=1;tr|Q5XF05|Q5XF05_ARATH At1g56440 OS=Arabidopsis thaliana GN=At1g56440 PE=2 SV=1;tr|F4I546|F4I546_ARATH Carboxylate clamp-tetratricopeptide repeat O	10.3	27.699	242	31505000	3641800	8.65094
Q9LSG2;A0A178VBT2;Q8VYJ4;A0A178V9D5;F4J8X6		At3g25150	1	tr|Q9LSG2|Q9LSG2_ARATH RNA-binding protein-like OS=Arabidopsis thaliana PE=4 SV=1;tr|A0A178VBT2|A0A178VBT2_ARATH Uncharacterized protein OS=Arabidopsis thaliana GN=AXX17_At3g27150 PE=4 SV=1;tr|Q8VYJ4|Q8VYJ4_ARATH AT3g25150/MJL12_9 OS=Arabidopsis thaliana G	2.1	51.459	473	12522000	1464500	8.55036
Q8VZK2;Q9LYI3	Translation machinery-associated protein 22	At5g11900;F14F18_70	7	tr|Q8VZK2|Q8VZK2_ARATH Translation machinery-associated protein 22 OS=Arabidopsis thaliana GN=At5g11900 PE=2 SV=1;tr|Q9LYI3|Q9LYI3_ARATH Translation machinery-associated protein 22 OS=Arabidopsis thaliana GN=F14F18_70 PE=3 SV=1	24.2	21.591	198	275320000	32952000	8.35518
Q8VZT1;Q9SMR7;Q8LE90		At4g39860;T5J17.30	1	tr|Q8VZT1|Q8VZT1_ARATH Putative uncharacterized protein At4g39860 OS=Arabidopsis thaliana GN=At4g39860 PE=1 SV=1;tr|Q9SMR7|Q9SMR7_ARATH Putative uncharacterized protein AT4g39860 OS=Arabidopsis thaliana GN=T5J17.30 PE=1 SV=1;tr|Q8LE90|Q8LE90_ARATH Putative	4.4	31.949	298	4716000	569140	8.28619
Q0WNP2;Q9LHS5;F4J6A8;A0A178VPF0;Q9CAY2		At5g06110;At3g11450;F24K9.12	2	tr|Q0WNP2|Q0WNP2_ARATH Cell division related protein-like (Fragment) OS=Arabidopsis thaliana GN=At5g06110 PE=2 SV=1;tr|Q9LHS5|Q9LHS5_ARATH Cell division related protein-like OS=Arabidopsis thaliana GN=At5g06110 PE=4 SV=1;tr|F4J6A8|F4J6A8_ARATH DnaJ and Myb	5.5	41.115	366	10227000	1249600	8.18422
Q56WW1;Q9M1Q0;A0A178VL83		At3g62240;T17J13.200	1	tr|Q56WW1|Q56WW1_ARATH Putative zinc-finger protein (Fragment) OS=Arabidopsis thaliana GN=At3g62240 PE=2 SV=1;tr|Q9M1Q0|Q9M1Q0_ARATH At3g62240 OS=Arabidopsis thaliana GN=T17J13.200 PE=1 SV=1;tr|A0A178VL83|A0A178VL83_ARATH Uncharacterized protein OS=Arabido	5.2	29.437	268	13591000	1693500	8.02539
Q9LFA1;Q8LFC2;A0A178VTR6;Q1G3R9		F8J2_70;At2g36355	2	tr|Q9LFA1|Q9LFA1_ARATH Putative uncharacterized protein At3g52900 OS=Arabidopsis thaliana GN=F8J2_70 PE=2 SV=1;tr|Q8LFC2|Q8LFC2_ARATH Putative uncharacterized protein OS=Arabidopsis thaliana PE=2 SV=1;tr|A0A178VTR6|A0A178VTR6_ARATH Uncharacterized protein	11.6	18.864	164	46713000	5875800	7.95007
Q3EBM1;Q2V422;Q9SJR4;Q8LCV2		At2g36410	6	tr|Q3EBM1|Q3EBM1_ARATH Putative uncharacterized protein At2g36410 OS=Arabidopsis thaliana GN=At2g36410 PE=2 SV=1;tr|Q2V422|Q2V422_ARATH Uncharacterized protein OS=Arabidopsis thaliana GN=At2g36410 PE=4 SV=1;tr|Q9SJR4|Q9SJR4_ARATH Expressed protein OS=Arabi	34.4	21.959	192	155900000	19960000	7.81062
A0A178VB22;Q96327	ERBB-3 BINDING PROTEIN 1	EBP1	10	tr|A0A178VB22|A0A178VB22_ARATH EBP1 OS=Arabidopsis thaliana GN=AXX17_At3g46170 PE=4 SV=1;sp|Q96327|EBP1_ARATH ERBB-3 BINDING PROTEIN 1 OS=Arabidopsis thaliana GN=EBP1 PE=1 SV=1	29.8	42.979	392	303390000	39108000	7.75775
A0A178VTA7;Q9ZQ19	Replication protein A 32 kDa subunit A	RPA2A	7	tr|A0A178VTA7|A0A178VTA7_ARATH RPA32A OS=Arabidopsis thaliana GN=AXX17_At2g20140 PE=4 SV=1;sp|Q9ZQ19|RFA2A_ARATH Replication protein A 32 kDa subunit A OS=Arabidopsis thaliana GN=RPA2A PE=1 SV=2	18.3	30.98	279	216450000	28553000	7.58064
A0A178V059;O49453	Uncharacterized protein At4g28440		10	tr|A0A178V059|A0A178V059_ARATH Uncharacterized protein OS=Arabidopsis thaliana GN=AXX17_At4g32750 PE=4 SV=1;sp|O49453|Y4844_ARATH Uncharacterized protein At4g28440 OS=Arabidopsis thaliana GN=At4g28440 PE=1 SV=1	63.4	16.459	153	1480700000	219940000	6.73229
A0A178VEL2;Q39250;A8MR09	Actin-depolymerizing factor 1	ADF1	6	tr|A0A178VEL2|A0A178VEL2_ARATH ATADF1 OS=Arabidopsis thaliana GN=AXX17_At3g39870 PE=3 SV=1;sp|Q39250|ADF1_ARATH Actin-depolymerizing factor 1 OS=Arabidopsis thaliana GN=ADF1 PE=1 SV=1;tr|A8MR09|A8MR09_ARATH Actin depolymerizing factor 1 OS=Arabidopsis thal	35.3	16.112	139	2449400000	380140000	6.44342
A0A178VRV3;Q8VZ42	Zinc finger AN1 and C2H2 domain-containing stress-associated protein 11	SAP11	4	tr|A0A178VRV3|A0A178VRV3_ARATH Uncharacterized protein OS=Arabidopsis thaliana GN=AXX17_At2g39120 PE=4 SV=1;sp|Q8VZ42|SAP11_ARATH Zinc finger AN1 and C2H2 domain-containing stress-associated protein 11 OS=Arabidopsis thaliana GN=SAP11 PE=2 SV=1	18.3	31.252	279	63842000	10184000	6.26885
A0A178WL87;A0A178WL72;O04379	Protein argonaute 1	AGO1	2	tr|A0A178WL87|A0A178WL87_ARATH ICU9 OS=Arabidopsis thaliana GN=AXX17_At1g42500 PE=3 SV=1;tr|A0A178WL72|A0A178WL72_ARATH ICU9 OS=Arabidopsis thaliana GN=AXX17_At1g42500 PE=3 SV=1;sp|O04379|AGO1_ARATH Protein argonaute 1 OS=Arabidopsis thaliana GN=AGO1 PE=1	2.7	116.19	1048	13602000	2250700	6.04345
A8MR07;Q9LF93;Q9SJQ0;Q94KE3;Q8LFE1;Q8H176;A0A178VCT3	Pyruvate kinase	At3g52990;F8J2_160;At2g36580	1	tr|A8MR07|A8MR07_ARATH Pyruvate kinase OS=Arabidopsis thaliana GN=At3g52990 PE=2 SV=1;tr|Q9LF93|Q9LF93_ARATH Pyruvate kinase OS=Arabidopsis thaliana GN=F8J2_160 PE=3 SV=1;tr|Q9SJQ0|Q9SJQ0_ARATH Pyruvate kinase OS=Arabidopsis thaliana GN=At2g36580 PE=1 SV=2	3.2	51.889	474	4493500	776640	5.78582
B9DGI7;A0A178UBJ4;F4KBT8;Q9FI44	Succinate dehydrogenase assembly factor 2, mitochondrial	At5g51040;SDHAF2	1	tr|B9DGI7|B9DGI7_ARATH AT5G51040 protein OS=Arabidopsis thaliana GN=At5g51040 PE=2 SV=1;tr|A0A178UBJ4|A0A178UBJ4_ARATH SDHAF2 OS=Arabidopsis thaliana GN=AXX17_At5g49830 PE=4 SV=1;tr|F4KBT8|F4KBT8_ARATH Succinate dehydrogenase assembly factor 2 OS=Arabidops	3.8	20.73	184	11684000	2021700	5.77929
Q9LXQ2;A0A178V6L1		F26G5_50	1	tr|Q9LXQ2|Q9LXQ2_ARATH At3g44100 OS=Arabidopsis thaliana GN=F26G5_50 PE=2 SV=1;tr|A0A178V6L1|A0A178V6L1_ARATH Uncharacterized protein OS=Arabidopsis thaliana GN=AXX17_At3g37650 PE=4 SV=1	7.2	16.07	152	2802700	504340	5.55716
A0A178VD46;B3H7F6;Q94KE2	Protein TIME FOR COFFEE	TIC	2	tr|A0A178VD46|A0A178VD46_ARATH TIC OS=Arabidopsis thaliana GN=AXX17_At3g24090 PE=4 SV=1;tr|B3H7F6|B3H7F6_ARATH Clock regulator protein time for coffee OS=Arabidopsis thaliana GN=TIC PE=1 SV=1;sp|Q94KE2|TIC_ARATH Protein TIME FOR COFFEE OS=Arabidopsis thali	1.8	164.44	1550	38237000	6944700	5.50593
Q9C865;A0A178W7G6		T8E3.10	5	sp|Q9C865|SH3P1_ARATH SH3 domain-containing protein 1 OS=Arabidopsis thaliana GN=SH3P1 PE=1 SV=1;tr|A0A178W7G6|A0A178W7G6_ARATH Uncharacterized protein OS=Arabidopsis thaliana GN=AXX17_At1g32100 PE=4 SV=1	11.4	49.258	439	209360000	38290000	5.46775
Q9C9M4		F4N21_15	1	tr|Q9C9M4|Q9C9M4_ARATH Putative uncharacterized protein F4N21_15 OS=Arabidopsis thaliana GN=F4N21_15 PE=4 SV=1	3.1	39.289	352	19345000	3545500	5.45621
A0A178VWX1;O22151	Golgi SNAP receptor complex member 1-2	GOS12	3	tr|A0A178VWX1|A0A178VWX1_ARATH GOS12 OS=Arabidopsis thaliana GN=AXX17_At2g42770 PE=3 SV=1;sp|O22151|GOS12_ARATH Golgi SNAP receptor complex member 1-2 OS=Arabidopsis thaliana GN=GOS12 PE=1 SV=2	17.6	26.47	239	66599000	12291000	5.41852
Q9SCM4	Zinc finger AN1 and C2H2 domain-containing stress-associated protein 13	SAP13	7	sp|Q9SCM4|SAP13_ARATH Zinc finger AN1 and C2H2 domain-containing stress-associated protein 13 OS=Arabidopsis thaliana GN=SAP13 PE=2 SV=1	29.7	27.76	249	87244000	16359000	5.33309
A0A178V535;Q9SU25	Transcription initiation factor IIF subunit alpha	RAP74	4	tr|A0A178V535|A0A178V535_ARATH Uncharacterized protein OS=Arabidopsis thaliana GN=AXX17_At4g14230 PE=4 SV=1;sp|Q9SU25|T2FA_ARATH Transcription initiation factor IIF subunit alpha OS=Arabidopsis thaliana GN=RAP74 PE=1 SV=1	6.1	60.056	543	26045000	4988300	5.22122
Q9MAR2		F28H19.11	3	tr|Q9MAR2|Q9MAR2_ARATH At1g43860 OS=Arabidopsis thaliana GN=F28H19.11 PE=2 SV=1	8.6	42.231	370	24845000	4893300	5.07735
B9DHZ8;A0A178UY83;P17745	Elongation factor Tu, chloroplastic	At4g20360;TUFA	2	tr|B9DHZ8|B9DHZ8_ARATH AT4G20360 protein (Fragment) OS=Arabidopsis thaliana GN=At4g20360 PE=2 SV=1;tr|A0A178UY83|A0A178UY83_ARATH Elongation factor Tu OS=Arabidopsis thaliana GN=AXX17_At4g23840 PE=3 SV=1;sp|P17745|EFTU_ARATH Elongation factor Tu, chloropla	9.1	31.704	287	20959000	4128100	5.07715
Q9LF99;Q8L9S7		F8J2_90;At3g52920	3	tr|Q9LF99|Q9LF99_ARATH Putative uncharacterized protein At3g52920 OS=Arabidopsis thaliana GN=F8J2_90 PE=2 SV=1;tr|Q8L9S7|Q8L9S7_ARATH Uncharacterized protein OS=Arabidopsis thaliana GN=At3g52920 PE=2 SV=1	17.5	20.667	177	28326000	5599600	5.05858
P25858;A0A178VKK2;A0A168L4G8	Glyceraldehyde-3-phosphate dehydrogenase GAPC1, cytosolic	GAPC1	17	sp|P25858|G3PC1_ARATH Glyceraldehyde-3-phosphate dehydrogenase GAPC1, cytosolic OS=Arabidopsis thaliana GN=GAPC1 PE=1 SV=2;tr|A0A178VKK2|A0A178VKK2_ARATH Glyceraldehyde-3-phosphate dehydrogenase OS=Arabidopsis thaliana GN=AXX17_At3g03530 PE=3 SV=1;tr|A0A16	52.1	36.914	338	2273400000	451990000	5.02976
Q9LP18;A0A178WNG0;A0A178WNI2		F14D7.8	6	tr|Q9LP18|Q9LP18_ARATH At1g35780/F14D7_9 OS=Arabidopsis thaliana GN=F14D7.8 PE=2 SV=1;tr|A0A178WNG0|A0A178WNG0_ARATH Uncharacterized protein OS=Arabidopsis thaliana GN=AXX17_At1g36570 PE=4 SV=1;tr|A0A178WNI2|A0A178WNI2_ARATH Uncharacterized protein OS=Arab	21	31.07	286	52489000	10863000	4.83191
Q2HIW6;Q8LAY9;Q67YH6;Q9FLH7		At5g51840	10	tr|Q2HIW6|Q2HIW6_ARATH At5g51840 OS=Arabidopsis thaliana GN=At5g51840 PE=2 SV=1;tr|Q8LAY9|Q8LAY9_ARATH Putative uncharacterized protein OS=Arabidopsis thaliana PE=2 SV=1;tr|Q67YH6|Q67YH6_ARATH Uncharacterized protein OS=Arabidopsis thaliana PE=2 SV=1;tr|Q9	29.8	27.086	245	212430000	45142000	4.70582
A0A178UM80;Q9ZRD6;A0A178UPU5;F4KDI1;Q9LVM9	VAMP-like protein YKT61;VAMP-like protein YKT62	YKT61;YKT62	3	tr|A0A178UM80|A0A178UM80_ARATH YKT61 OS=Arabidopsis thaliana GN=AXX17_At5g57390 PE=3 SV=1;sp|Q9ZRD6|YKT61_ARATH VAMP-like protein YKT61 OS=Arabidopsis thaliana GN=YKT61 PE=2 SV=1;tr|A0A178UPU5|A0A178UPU5_ARATH YKT62 OS=Arabidopsis thaliana GN=AXX17_At5g575	14.6	22.543	199	15264000	3267300	4.67175
A0A178VL18;Q9LJH8	Oligouridylate-binding protein 1C	UBP1C	1	tr|A0A178VL18|A0A178VL18_ARATH Uncharacterized protein OS=Arabidopsis thaliana GN=AXX17_At3g14630 PE=4 SV=1;sp|Q9LJH8|UBP1C_ARATH Oligouridylate-binding protein 1C OS=Arabidopsis thaliana GN=UBP1C PE=1 SV=1	3.3	47.057	427	10935000	2362000	4.62955
O23593;A0A178V0K1		dl4795w	4	sp|O23593|RGGB_ARATH RGG repeats nuclear RNA binding protein B OS=Arabidopsis thaliana GN=RGGB PE=1 SV=1;tr|A0A178V0K1|A0A178V0K1_ARATH Uncharacterized protein OS=Arabidopsis thaliana GN=AXX17_At4g20580 PE=4 SV=1	15.8	38.905	360	164960000	36256000	4.54987
Q8S8S8;Q8LFS1		At2g19385	1	tr|Q8S8S8|Q8S8S8_ARATH At2g19385 OS=Arabidopsis thaliana GN=At2g19385 PE=1 SV=1;tr|Q8LFS1|Q8LFS1_ARATH Putative uncharacterized protein OS=Arabidopsis thaliana PE=2 SV=1	5.5	30.656	275	6786700	1503300	4.51453
Q9SAD7;A0A178W345		F3F19.4	10	sp|Q9SAD7|IF4B2_ARATH Eukaryotic translation initiation factor 4B2 OS=Arabidopsis thaliana GN=EIF4B2 PE=1 SV=1;tr|A0A178W345|A0A178W345_ARATH EIF4B2 OS=Arabidopsis thaliana GN=AXX17_At1g13440 PE=4 SV=1	23.3	59.324	549	217270000	49610000	4.37956
Q84TF9;Q0WU79;Q9LZF2		At5g03370;F12E4_110	5	tr|Q84TF9|Q84TF9_ARATH At5g03370 OS=Arabidopsis thaliana PE=2 SV=1;tr|Q0WU79|Q0WU79_ARATH Putative uncharacterized protein At5g03370 (Fragment) OS=Arabidopsis thaliana GN=At5g03370 PE=2 SV=1;tr|Q9LZF2|Q9LZF2_ARATH Acylphosphatase family protein OS=Arabidop	64.2	11.649	106	399400000	91648000	4.35798
A0A178V0M2;O48646	Probable phospholipid hydroperoxide glutathione peroxidase 6, mitochondrial	GPX6	4	tr|A0A178V0M2|A0A178V0M2_ARATH Glutathione peroxidase OS=Arabidopsis thaliana GN=AXX17_At4g13080 PE=3 SV=1;sp|O48646|GPX6_ARATH Probable phospholipid hydroperoxide glutathione peroxidase 6, mitochondrial OS=Arabidopsis thaliana GN=GPX6 PE=2 SV=2	20	25.845	235	48476000	11159000	4.34412
Q940P0;F4KGP6;Q9LZS2		At5g03660;F17C15_80	6	tr|Q940P0|Q940P0_ARATH AT5g03660/F17C15_80 OS=Arabidopsis thaliana GN=At5g03660 PE=1 SV=1;tr|F4KGP6|F4KGP6_ARATH Uncharacterized protein OS=Arabidopsis thaliana GN=At5g03660 PE=1 SV=1;tr|Q9LZS2|Q9LZS2_ARATH Putative uncharacterized protein F17C15_80 OS=Ara	32.9	20.186	173	293490000	69043000	4.25083
Q9M994;Q9FVQ1;A0A178W6B8	Nucleolin 1	NUCL1	14	tr|Q9M994|Q9M994_ARATH F27J15.29 OS=Arabidopsis thaliana PE=4 SV=1;sp|Q9FVQ1|NUCL1_ARATH Nucleolin 1 OS=Arabidopsis thaliana GN=NUCL1 PE=1 SV=1;tr|A0A178W6B8|A0A178W6B8_ARATH PARL1 OS=Arabidopsis thaliana GN=AXX17_At1g43030 PE=4 SV=1	46.6	20.279	193	6454000000	1540500000	4.18955
A0A178VBB5;Q94CE5	Gamma-aminobutyrate transaminase POP2, mitochondrial	POP2	9	tr|A0A178VBB5|A0A178VBB5_ARATH POP2 OS=Arabidopsis thaliana GN=AXX17_At3g23870 PE=3 SV=1;sp|Q94CE5|GATP_ARATH Gamma-aminobutyrate transaminase POP2, mitochondrial OS=Arabidopsis thaliana GN=POP2 PE=1 SV=1	17.9	55.215	504	677170000	167920000	4.03269
A0A178W4Q5;Q9FX54;C0Z2I0;F4HQT1	Glyceraldehyde-3-phosphate dehydrogenase GAPC2, cytosolic;Glyceraldehyde-3-phosphate dehydrogenase	GAPC2;At1g13440	2	tr|A0A178W4Q5|A0A178W4Q5_ARATH Glyceraldehyde-3-phosphate dehydrogenase OS=Arabidopsis thaliana GN=AXX17_At1g13910 PE=3 SV=1;sp|Q9FX54|G3PC2_ARATH Glyceraldehyde-3-phosphate dehydrogenase GAPC2, cytosolic OS=Arabidopsis thaliana GN=GAPC2 PE=1 SV=1;tr|C0Z2I	6.5	36.913	338	40563000	10120000	4.0082
Q944Q6;Q93VN2;Q8LA43		At2g14835	3	tr|Q944Q6|Q944Q6_ARATH Expressed protein OS=Arabidopsis thaliana GN=At2g14835 PE=1 SV=1;tr|Q93VN2|Q93VN2_ARATH At2g14841 OS=Arabidopsis thaliana PE=2 SV=1;tr|Q8LA43|Q8LA43_ARATH Uncharacterized protein OS=Arabidopsis thaliana GN=AXX17_At2g10030 PE=2 SV=1	12.5	37.437	343	78667000	19961000	3.94104
Q9SY88;Q8GZ68		T25B24.3;At1g61620/T25B24_3	6	tr|Q9SY88|Q9SY88_ARATH Nitric oxide synthase-interacting protein homolog OS=Arabidopsis thaliana GN=T25B24.3 PE=2 SV=1;tr|Q8GZ68|Q8GZ68_ARATH Nitric oxide synthase-interacting protein homolog OS=Arabidopsis thaliana GN=At1g61620/T25B24_3 PE=2 SV=1	20.6	35.023	310	66463000	17386000	3.82279
Q9SB63;A0A178V4V5	Protein MODIFIER OF SNC1 1	MOS1	3	sp|Q9SB63|MOS1_ARATH Protein MODIFIER OF SNC1 1 OS=Arabidopsis thaliana GN=MOS1 PE=1 SV=2;tr|A0A178V4V5|A0A178V4V5_ARATH MOS1 OS=Arabidopsis thaliana GN=AXX17_At4g28560 PE=4 SV=1	4.2	153.69	1412	8035300	2109800	3.80856
A0A178VBW3;Q9LYB9	Methyl-CpG-binding domain-containing protein 4	MBD4	2	tr|A0A178VBW3|A0A178VBW3_ARATH MBD4 OS=Arabidopsis thaliana GN=AXX17_At3g57310 PE=4 SV=1;sp|Q9LYB9|MBD4_ARATH Methyl-CpG-binding domain-containing protein 4 OS=Arabidopsis thaliana GN=MBD4 PE=2 SV=1	13.4	21.159	186	16493000	4366000	3.7776
Q9LFK8;Q8RXI0		F2K13_80;At5g16930	3	tr|Q9LFK8|Q9LFK8_ARATH Putative uncharacterized protein F2K13_80 OS=Arabidopsis thaliana GN=F2K13_80 PE=4 SV=1;tr|Q8RXI0|Q8RXI0_ARATH AAA-type ATPase family protein OS=Arabidopsis thaliana GN=At5g16930 PE=2 SV=1	5.7	65.591	599	53501000	14320000	3.7361
F4IIU4;A0A178VNR9	187-kDa microtubule-associated protein AIR9	AIR9	2	sp|F4IIU4|AIR9_ARATH 187-kDa microtubule-associated protein AIR9 OS=Arabidopsis thaliana GN=AIR9 PE=1 SV=1;tr|A0A178VNR9|A0A178VNR9_ARATH AIR9 OS=Arabidopsis thaliana GN=AXX17_At2g31240 PE=4 SV=1	1.7	186.86	1708	20024000	5712400	3.50536
A0A178VSH4;F4IK92		At2g07170	1	tr|A0A178VSH4|A0A178VSH4_ARATH Uncharacterized protein OS=Arabidopsis thaliana GN=AXX17_At2g05990 PE=4 SV=1;sp|F4IK92|TORL2_ARATH TORTIFOLIA1-like protein 2 OS=Arabidopsis thaliana GN=TOR1L2 PE=3 SV=1	0.9	90.196	816	10782000	3085200	3.49475
Q9SUN5;Q9FI15;Q8LG45;Q67ZP4	Small nuclear ribonucleoprotein-associated protein	F9F13.90;MFC16.13;At5g44500	2	tr|Q9SUN5|Q9SUN5_ARATH Small nuclear ribonucleoprotein-associated protein OS=Arabidopsis thaliana GN=F9F13.90 PE=2 SV=1;tr|Q9FI15|Q9FI15_ARATH Small nuclear ribonucleoprotein-associated protein OS=Arabidopsis thaliana GN=MFC16.13 PE=2 SV=1;tr|Q8LG45|Q8LG45	7.8	27.139	257	50787000	14673000	3.46126
A0A178UGN7;Q9FK35	Adenylate kinase 3	ADK2	2	tr|A0A178UGN7|A0A178UGN7_ARATH Uncharacterized protein OS=Arabidopsis thaliana GN=AXX17_At5g49250 PE=3 SV=1;sp|Q9FK35|KAD3_ARATH Adenylate kinase 3 OS=Arabidopsis thaliana GN=ADK2 PE=1 SV=1	10.5	27.263	248	33611000	9740200	3.45075
A0A178V1P5;Q9SUG6	Plant UBX domain-containing protein 3	PUX3	1	tr|A0A178V1P5|A0A178V1P5_ARATH PUX3 OS=Arabidopsis thaliana GN=AXX17_At4g25690 PE=4 SV=1;sp|Q9SUG6|PUX3_ARATH Plant UBX domain-containing protein 3 OS=Arabidopsis thaliana GN=PUX3 PE=1 SV=1	5.3	32.91	302	9704000	2828700	3.43055
F4ILR7;A0A178VST3		At2g35920	2	sp|F4ILR7|DEXH1_ARATH DExH-box ATP-dependent RNA helicase DExH1 OS=Arabidopsis thaliana GN=At2g35920 PE=2 SV=1;tr|A0A178VST3|A0A178VST3_ARATH Uncharacterized protein OS=Arabidopsis thaliana GN=AXX17_At2g32570 PE=4 SV=1	2.4	111.04	995	9370400	2779100	3.37174
Q9FG81		At5g43830	3	tr|Q9FG81|Q9FG81_ARATH Aluminium induced protein with YGL and LRDR motifs OS=Arabidopsis thaliana GN=At5g43830 PE=1 SV=1	14.7	27.509	251	52406000	16725000	3.13339
Q0WSU5;O24520	Non-symbiotic hemoglobin 1	At2g16060;AHB1	29	tr|Q0WSU5|Q0WSU5_ARATH Class 1 non-symbiotic hemoglobin OS=Arabidopsis thaliana GN=At2g16060 PE=2 SV=1;sp|O24520|HBL1_ARATH Non-symbiotic hemoglobin 1 OS=Arabidopsis thaliana GN=AHB1 PE=1 SV=1	98.1	18.034	160	46372000000	14867000000	3.11912
O64527;A0A178WEW8	UPF0678 fatty acid-binding protein-like protein At1g79260		9	sp|O64527|Y1926_ARATH UPF0678 fatty acid-binding protein-like protein At1g79260 OS=Arabidopsis thaliana GN=At1g79260 PE=1 SV=1;tr|A0A178WEW8|A0A178WEW8_ARATH Uncharacterized protein OS=Arabidopsis thaliana GN=AXX17_At1g74040 PE=4 SV=1	48.2	18.486	166	483090000	155610000	3.10449
A0A178UD94;Q949Y3	Bifunctional purple acid phosphatase 26;Acid phosphatase;Peroxidase	PAP26	1	tr|A0A178UD94|A0A178UD94_ARATH Purple acid phosphatase OS=Arabidopsis thaliana GN=AXX17_At5g30750 PE=3 SV=1;sp|Q949Y3|PPA26_ARATH Bifunctional purple acid phosphatase 26 OS=Arabidopsis thaliana GN=PAP26 PE=1 SV=1	2.5	55.009	475	6075000	1988100	3.05568
A0A178VLE1			1	tr|A0A178VLE1|A0A178VLE1_ARATH Uncharacterized protein OS=Arabidopsis thaliana GN=AXX17_At3g33420 PE=4 SV=1	1.5	105.52	962	92128000	30199000	3.0507
A0A178UAM7;O82514;C0Z2D0;F4KAP2	Adenylate kinase 4	ADK1;At5g63400	7	tr|A0A178UAM7|A0A178UAM7_ARATH ADK1 OS=Arabidopsis thaliana GN=AXX17_At5g62960 PE=3 SV=1;sp|O82514|KAD4_ARATH Adenylate kinase 4 OS=Arabidopsis thaliana GN=ADK1 PE=1 SV=2;tr|C0Z2D0|C0Z2D0_ARATH AT5G63400 protein OS=Arabidopsis thaliana GN=At5g63400 PE=2 SV	30.1	26.932	246	249630000	82736000	3.01719
A0A178UVV4;Q9SV55	AFP homolog 2	AFPH2	2	tr|A0A178UVV4|A0A178UVV4_ARATH NINJA OS=Arabidopsis thaliana GN=AXX17_At4g33240 PE=4 SV=1;sp|Q9SV55|NINJA_ARATH AFP homolog 2 OS=Arabidopsis thaliana GN=AFPH2 PE=1 SV=1	7.3	44.937	425	20049000	6679800	3.00144
A0A178VS21;A0A178VQ37;O48847;A0A178VQH2		LUH	2	tr|A0A178VS21|A0A178VS21_ARATH MUM1 OS=Arabidopsis thaliana GN=AXX17_At2g29060 PE=4 SV=1;tr|A0A178VQ37|A0A178VQ37_ARATH MUM1 OS=Arabidopsis thaliana GN=AXX17_At2g29060 PE=4 SV=1;sp|O48847|LUH_ARATH Transcriptional corepressor LEUNIG_HOMOLOG OS=Arabidopsis	6.8	54.008	501	19084000	6477200	2.94633
Q9LU37;Q9ASW4;A0A178VC99		At3g21215	4	tr|Q9LU37|Q9LU37_ARATH Uncharacterized protein OS=Arabidopsis thaliana PE=4 SV=1;tr|Q9ASW4|Q9ASW4_ARATH AT3G21215 protein OS=Arabidopsis thaliana GN=At3g21215 PE=2 SV=1;tr|A0A178VC99|A0A178VC99_ARATH Uncharacterized protein OS=Arabidopsis thaliana GN=AXX17	11	34.831	317	24309000	8678400	2.80109
A0A178UAD3;F4JX00	Kinesin-like protein	At5g41310	1	tr|A0A178UAD3|A0A178UAD3_ARATH Kinesin-like protein OS=Arabidopsis thaliana GN=AXX17_At5g39080 PE=3 SV=1;sp|F4JX00|KN14K_ARATH Kinesin-like protein KIN-14K OS=Arabidopsis thaliana GN=KIN14K PE=3 SV=2	1.2	108.57	965	11850000	4262000	2.78038
Q0WLC2;Q0WM35;F4J110;F4J109;A0A178VFW0;Q8L611	Protein transport protein SEC31 homolog B	At3g63460;SEC31B	1	tr|Q0WLC2|Q0WLC2_ARATH Putative uncharacterized protein At3g63460 (Fragment) OS=Arabidopsis thaliana GN=At3g63460 PE=2 SV=1;tr|Q0WM35|Q0WM35_ARATH Putative uncharacterized protein At3g63460 (Fragment) OS=Arabidopsis thaliana GN=At3g63460 PE=2 SV=1;tr|F4J11	5.7	24.152	228	38521000	14126000	2.72696
A0A178WC38;Q4PT02	Gibberellin 20 oxidase 5	GA20OX5	1	tr|A0A178WC38|A0A178WC38_ARATH GA20OX5 OS=Arabidopsis thaliana GN=AXX17_At1g40140 PE=3 SV=1;sp|Q4PT02|GAOX5_ARATH Gibberellin 20 oxidase 5 OS=Arabidopsis thaliana GN=GA20OX5 PE=2 SV=1	3.4	43.161	385	9425300	3528900	2.67089
A0A178VV70;Q9SII8	Ubiquitin domain-containing protein DSK2b	DSK2B	6	tr|A0A178VV70|A0A178VV70_ARATH DSK2b OS=Arabidopsis thaliana GN=AXX17_At2g12370 PE=4 SV=1;sp|Q9SII8|DSK2B_ARATH Ubiquitin domain-containing protein DSK2b OS=Arabidopsis thaliana GN=DSK2B PE=1 SV=1	20.4	49.174	465	248650000	93717000	2.6532
Q9LIN5;A0A178VCE6		EIF4B1	4	sp|Q9LIN5|IF4B1_ARATH Eukaryotic translation initiation factor 4B1 OS=Arabidopsis thaliana GN=EIF4B1 PE=1 SV=1;tr|A0A178VCE6|A0A178VCE6_ARATH EIF4B1 OS=Arabidopsis thaliana GN=AXX17_At3g28630 PE=4 SV=1	10	57.719	532	18509000	7018600	2.63714
F4KE21;A0A178ULU5;Q42533	Biotin carboxyl carrier protein of acetyl-CoA carboxylase 1, chloroplastic	CAC1;BCCP1	6	tr|F4KE21|F4KE21_ARATH CAC1A OS=Arabidopsis thaliana GN=CAC1 PE=4 SV=1;tr|A0A178ULU5|A0A178ULU5_ARATH CAC1A OS=Arabidopsis thaliana GN=AXX17_At5g15990 PE=4 SV=1;sp|Q42533|BCCP1_ARATH Biotin carboxyl carrier protein of acetyl-CoA carboxylase 1, chloroplasti	26	26.927	254	639520000	246850000	2.59072
A0A178U834;P68209	Succinyl-CoA ligase [ADP-forming] subunit alpha-1, mitochondrial		1	tr|A0A178U834|A0A178U834_ARATH Uncharacterized protein OS=Arabidopsis thaliana GN=AXX17_At5g08090 PE=3 SV=1;sp|P68209|SUCA1_ARATH Succinate--CoA ligase [ADP-forming] subunit alpha-1, mitochondrial OS=Arabidopsis thaliana GN=At5g08300 PE=1 SV=1	5.5	36.151	347	10605000	4111300	2.57948
Q67YV9;Q681L9;Q681H0;A0A178VX95;B9DH97;Q9ZTW3;P47192	Vesicle-associated membrane protein 721;Vesicle-associated membrane protein 722	VAMP721;At1g04740;SAR1;VAMP722	1	tr|Q67YV9|Q67YV9_ARATH Putative vesicle-associated membrane protein, synaptobrevin 7B OS=Arabidopsis thaliana GN=VAMP721 PE=2 SV=1;tr|Q681L9|Q681L9_ARATH Putative vesicle-associated membrane protein, synaptobrevin 7B OS=Arabidopsis thaliana GN=At1g04740 PE	8.8	20.507	181	13986000	5505300	2.54046
A0A178VNN5;Q9SJ66	Probable sucrose-phosphatase 2	SPP2	5	tr|A0A178VNN5|A0A178VNN5_ARATH Uncharacterized protein OS=Arabidopsis thaliana GN=AXX17_At2g32500 PE=4 SV=1;sp|Q9SJ66|SPP2_ARATH Probable sucrose-phosphatase 2 OS=Arabidopsis thaliana GN=SPP2 PE=2 SV=2	14.9	47.827	422	124560000	49837000	2.49935
A0A178UM13;Q9LYN7	Protein MEI2-like 4	ML4	2	tr|A0A178UM13|A0A178UM13_ARATH ML4 OS=Arabidopsis thaliana GN=AXX17_At5g06960 PE=4 SV=1;sp|Q9LYN7|AML4_ARATH Protein MEI2-like 4 OS=Arabidopsis thaliana GN=ML4 PE=2 SV=1	2.9	99.905	907	2439500	978350	2.49348
A0A178UUS8;Q9FVJ3	ADP-ribosylation factor GTPase-activating protein AGD12	AGD12	3	tr|A0A178UUS8|A0A178UUS8_ARATH ZAC OS=Arabidopsis thaliana GN=AXX17_At4g24490 PE=4 SV=1;sp|Q9FVJ3|AGD12_ARATH ADP-ribosylation factor GTPase-activating protein AGD12 OS=Arabidopsis thaliana GN=AGD12 PE=1 SV=1	8.6	37.145	337	41526000	16710000	2.4851
Q9SZP8;A0A178UXH0		F20M13.270	2	sp|Q9SZP8|IF4B3_ARATH Eukaryotic translation initiation factor 4B3 OS=Arabidopsis thaliana GN=EIF4B3 PE=1 SV=1;tr|A0A178UXH0|A0A178UXH0_ARATH Uncharacterized protein OS=Arabidopsis thaliana GN=AXX17_At4g44050 PE=4 SV=1	6.4	48.987	452	36402000	15046000	2.41938
A0A178W5G5;O04023		F7G19.6	1	tr|A0A178W5G5|A0A178W5G5_ARATH SRC2 OS=Arabidopsis thaliana GN=AXX17_At1g08890 PE=4 SV=1;sp|O04023|SRC2_ARATH Protein SRC2 homolog OS=Arabidopsis thaliana GN=SRC2 PE=1 SV=1	3.7	33.828	321	3573800	1491000	2.39691
A0A178VJ70;Q84JZ6	Multiple organellar RNA editing factor 3, mitochondrial	MORF3	1	tr|A0A178VJ70|A0A178VJ70_ARATH MORF3 OS=Arabidopsis thaliana GN=AXX17_At3g06680 PE=4 SV=1;sp|Q84JZ6|MORF3_ARATH Multiple organellar RNA editing factor 3, mitochondrial OS=Arabidopsis thaliana GN=MORF3 PE=1 SV=1	6.1	27.558	244	56500000	23687000	2.38527
Q9ASS2;A0A178W8P1		At1g20110	2	sp|Q9ASS2|FREE1_ARATH Protein FREE1 OS=Arabidopsis thaliana GN=FREE1 PE=1 SV=1;tr|A0A178W8P1|A0A178W8P1_ARATH Uncharacterized protein OS=Arabidopsis thaliana GN=AXX17_At1g21090 PE=4 SV=1	3.2	65.395	601	4074100	1770100	2.30162
A0A178UA34;Q9LTF2;B9DH50;Q0WWM0	40S ribosomal protein S10-3	RPS10C;At5g52650	21	tr|A0A178UA34|A0A178UA34_ARATH Uncharacterized protein OS=Arabidopsis thaliana GN=AXX17_At5g51530 PE=4 SV=1;sp|Q9LTF2|RS103_ARATH 40S ribosomal protein S10-3 OS=Arabidopsis thaliana GN=RPS10C PE=2 SV=2;tr|B9DH50|B9DH50_ARATH AT5G52650 protein OS=Arabidopsi	73.2	19.551	179	7261300000	3162000000	2.29643
A0A178VBQ7;P25864	50S ribosomal protein L9, chloroplastic	RPL9	1	tr|A0A178VBQ7|A0A178VBQ7_ARATH RPL9 OS=Arabidopsis thaliana GN=AXX17_At3g38710 PE=3 SV=1;sp|P25864|RK9_ARATH 50S ribosomal protein L9, chloroplastic OS=Arabidopsis thaliana GN=RPL9 PE=2 SV=1	4.1	22.134	197	6416200	2860700	2.24288
O82762;A0A178VUZ4		At2g25970	8	tr|O82762|O82762_ARATH F17H15.1/F17H15.1 OS=Arabidopsis thaliana GN=At2g25970 PE=1 SV=1;tr|A0A178VUZ4|A0A178VUZ4_ARATH Uncharacterized protein OS=Arabidopsis thaliana GN=AXX17_At2g21820 PE=4 SV=1	16.3	64.606	632	53594000	23985000	2.23448
Q9FXB0		F25P12.97	2	tr|Q9FXB0|Q9FXB0_ARATH At1g56580/F25P12_18 OS=Arabidopsis thaliana GN=F25P12.97 PE=2 SV=1	12.7	18.406	166	18521000	8359700	2.21551
Q9SW09;F4JTD3	40S ribosomal protein S10-1	RPS10A;At4g25740	5	sp|Q9SW09|RS101_ARATH 40S ribosomal protein S10-1 OS=Arabidopsis thaliana GN=RPS10A PE=2 SV=1;tr|F4JTD3|F4JTD3_ARATH 40S ribosomal protein S10-1 OS=Arabidopsis thaliana GN=At4g25740 PE=4 SV=1	40.1	19.447	177	43573000	19756000	2.20556
A0A178W7L9;Q9CAK8	2-C-methyl-D-erythritol 2,4-cyclodiphosphate synthase, chloroplastic	ISPF	7	tr|A0A178W7L9|A0A178W7L9_ARATH 2-C-methyl-D-erythritol 2,4-cyclodiphosphate synthase OS=Arabidopsis thaliana GN=AXX17_At1g57420 PE=3 SV=1;sp|Q9CAK8|ISPF_ARATH 2-C-methyl-D-erythritol 2,4-cyclodiphosphate synthase, chloroplastic OS=Arabidopsis thaliana GN=I	23.4	24.827	231	495690000	225080000	2.20228
Q9ZUC0		F5O8.30	8	tr|Q9ZUC0|Q9ZUC0_ARATH F5O8.30 protein OS=Arabidopsis thaliana GN=F5O8.30 PE=2 SV=1	48.9	15.127	137	305030000	139780000	2.18221
Q93V74		At4g34180	3	tr|Q93V74|Q93V74_ARATH AT4g34180/F28A23_60 OS=Arabidopsis thaliana GN=At4g34180 PE=2 SV=1	14.1	28.384	255	18832000	8731200	2.15686
A0A178UF45;Q9LFP1	Vesicle-associated membrane protein 713	VAMP713	2	tr|A0A178UF45|A0A178UF45_ARATH VAMP713 OS=Arabidopsis thaliana GN=AXX17_At5g10830 PE=3 SV=1;sp|Q9LFP1|VA713_ARATH Vesicle-associated membrane protein 713 OS=Arabidopsis thaliana GN=VAMP713 PE=2 SV=1	16.7	25.32	221	7707000	3578200	2.15388
F4JBC9;A0A178VD11;Q9LU86	Peroxiredoxin Q, chloroplastic	ATPRX Q;PRXQ	5	tr|F4JBC9|F4JBC9_ARATH Peroxiredoxin Q OS=Arabidopsis thaliana GN=ATPRX Q PE=4 SV=1;tr|A0A178VD11|A0A178VD11_ARATH PRXQ OS=Arabidopsis thaliana GN=AXX17_At3g28170 PE=4 SV=1;sp|Q9LU86|PRXQ_ARATH Peroxiredoxin Q, chloroplastic OS=Arabidopsis thaliana GN=PRXQ	22.1	23.806	217	103110000	48208000	2.13886
A0A178W930;Q9SRG3	Protein disulfide isomerase-like 1-2	PDIL1-2	6	tr|A0A178W930|A0A178W930_ARATH Protein disulfide-isomerase OS=Arabidopsis thaliana GN=AXX17_At1g72080 PE=3 SV=1;sp|Q9SRG3|PDI12_ARATH Protein disulfide isomerase-like 1-2 OS=Arabidopsis thaliana GN=PDIL1-2 PE=2 SV=1	10	56.364	508	140280000	66666000	2.10422
F4HZN9;A0A178WAM1;A0A178W8M5;Q9XI01	Protein disulfide-isomerase;Protein disulfide isomerase-like 1-1	PDIL1-1	2	tr|F4HZN9|F4HZN9_ARATH Protein disulfide-isomerase OS=Arabidopsis thaliana GN=PDIL1-1 PE=3 SV=1;tr|A0A178WAM1|A0A178WAM1_ARATH Protein disulfide-isomerase OS=Arabidopsis thaliana GN=AXX17_At1g22850 PE=3 SV=1;tr|A0A178W8M5|A0A178W8M5_ARATH Protein disulfide	8.2	54.158	487	19148000	9151800	2.09227
A0A178VMP3;A0A178VKZ6;F4JEN1;Q94AM9	Polyadenylate-binding protein-interacting protein 4	CID4	4	tr|A0A178VMP3|A0A178VMP3_ARATH CID4 OS=Arabidopsis thaliana GN=AXX17_At3g14510 PE=4 SV=1;tr|A0A178VKZ6|A0A178VKZ6_ARATH CID4 OS=Arabidopsis thaliana GN=AXX17_At3g14510 PE=4 SV=1;tr|F4JEN1|F4JEN1_ARATH Hydroxyproline-rich glycoprotein family protein OS=Arab	7	42.864	383	127780000	62490000	2.04481
A0A178WJX4;A0A178V0Z9;A0A178WLU6;Q9LQ81;Q570Y6	Actin-depolymerizing factor 10;Actin-depolymerizing factor 8	ADF10;ADF8	4	tr|A0A178WJX4|A0A178WJX4_ARATH ADF11 OS=Arabidopsis thaliana GN=AXX17_At1g00870 PE=3 SV=1;tr|A0A178V0Z9|A0A178V0Z9_ARATH ADF8 OS=Arabidopsis thaliana GN=AXX17_At4g00840 PE=3 SV=1;tr|A0A178WLU6|A0A178WLU6_ARATH ADF11 OS=Arabidopsis thaliana GN=AXX17_At1g008	10.7	16.341	140	103130000	52165000	1.977
F4JM86;B9DFK6;Q940G2;A0A178UUD0;P25819	Catalase;Catalase-2	CAT2;At4g35090;At4g35090/M4E13.140	1	tr|F4JM86|F4JM86_ARATH Catalase OS=Arabidopsis thaliana GN=CAT2 PE=3 SV=1;tr|B9DFK6|B9DFK6_ARATH Catalase OS=Arabidopsis thaliana GN=At4g35090 PE=2 SV=1;tr|Q940G2|Q940G2_ARATH Catalase OS=Arabidopsis thaliana GN=At4g35090/M4E13.140 PE=2 SV=1;tr|A0A178UUD0|	2.7	54.994	474	4133000	2152700	1.91991
Q9SL42;A5YYY9	Peptidyl-prolyl cis-trans isomerase Pin1	PIN1	13	sp|Q9SL42|PIN1_ARATH Peptidyl-prolyl cis-trans isomerase Pin1 OS=Arabidopsis thaliana GN=PIN1 PE=1 SV=1;tr|A5YYY9|A5YYY9_ARATH Peptidyl-prolyl cis-trans isomerase (Fragment) OS=Arabidopsis thaliana GN=PIN1 PE=4 SV=1	85.7	13.015	119	883160000	475100000	1.85889
A0A178W5C4;Q8VYI3	Enoyl-CoA hydratase 2, peroxisomal	ECH2	3	tr|A0A178W5C4|A0A178W5C4_ARATH ECH2 OS=Arabidopsis thaliana GN=AXX17_At1g70600 PE=4 SV=1;sp|Q8VYI3|ECH2_ARATH Enoyl-CoA hydratase 2, peroxisomal OS=Arabidopsis thaliana GN=ECH2 PE=1 SV=1	12.3	34.07	309	22663000	12416000	1.82531
A0A178VIA7;C0Z301;Q9C5H4	VHS domain-containing protein At3g16270	At3g16270	1	tr|A0A178VIA7|A0A178VIA7_ARATH Uncharacterized protein OS=Arabidopsis thaliana GN=AXX17_At3g17100 PE=4 SV=1;tr|C0Z301|C0Z301_ARATH AT3G16270 protein OS=Arabidopsis thaliana GN=At3g16270 PE=2 SV=1;sp|Q9C5H4|Y3627_ARATH VHS domain-containing protein At3g1627	1.7	74.891	690	2777600	1552800	1.78877
P57106;A0A178UFW3	Malate dehydrogenase, cytoplasmic 2	MDH2	2	sp|P57106|MDHC2_ARATH Malate dehydrogenase 2, cytoplasmic OS=Arabidopsis thaliana GN=MDH2 PE=1 SV=1;tr|A0A178UFW3|A0A178UFW3_ARATH Malate dehydrogenase OS=Arabidopsis thaliana GN=AXX17_At5g41330 PE=3 SV=1	8.4	35.675	332	18028000	10228000	1.76261
Q9SI66;A0A178W537;Q84JF2;A0A178W3I9			3	tr|Q9SI66|Q9SI66_ARATH F23N19.20 OS=Arabidopsis thaliana PE=4 SV=1;tr|A0A178W537|A0A178W537_ARATH Uncharacterized protein OS=Arabidopsis thaliana GN=AXX17_At1g56150 PE=4 SV=1;tr|Q84JF2|Q84JF2_ARATH Class I peptide chain release factor OS=Arabidopsis thalia	17.7	15.054	130	43485000	24834000	1.75103
A0A178W3K4;Q9ST43	Pleckstrin homology domain-containing protein 1	PH1	3	tr|A0A178W3K4|A0A178W3K4_ARATH PH1 OS=Arabidopsis thaliana GN=AXX17_At2g25820 PE=4 SV=1;sp|Q9ST43|PH1_ARATH Pleckstrin homology domain-containing protein 1 OS=Arabidopsis thaliana GN=PH1 PE=2 SV=2	26.9	16.811	145	138950000	80600000	1.72395
Q9M9N3;Q0WP05;A0A178VMP4		T17B22.17;At3g03140	1	tr|Q9M9N3|Q9M9N3_ARATH PWWP domain-containing protein OS=Arabidopsis thaliana GN=T17B22.17 PE=4 SV=1;tr|Q0WP05|Q0WP05_ARATH Putative uncharacterized protein At3g03140 OS=Arabidopsis thaliana GN=At3g03140 PE=2 SV=1;tr|A0A178VMP4|A0A178VMP4_ARATH Uncharacter	2.1	87.384	769	6177400	3598900	1.71647
Q9FFV1		At5g54760	1	tr|Q9FFV1|Q9FFV1_ARATH At5g54760 OS=Arabidopsis thaliana GN=At5g54760 PE=1 SV=1	29.2	12.62	113	25690000	15662000	1.64028
F4J8L7;Q9LHL7;Q8L863		At3g12050;T21B14.13	1	tr|F4J8L7|F4J8L7_ARATH Aha1 domain-containing protein OS=Arabidopsis thaliana GN=At3g12050 PE=1 SV=1;tr|Q9LHL7|Q9LHL7_ARATH Aha1 domain-containing protein OS=Arabidopsis thaliana GN=T21B14.13 PE=1 SV=1;tr|Q8L863|Q8L863_ARATH Putative uncharacterized protei	4	35.794	321	5031500	3078200	1.63456
A0A178VPL4;Q8L7R2;A0A097PK69	Homoserine kinase	HSK	3	tr|A0A178VPL4|A0A178VPL4_ARATH HSK OS=Arabidopsis thaliana GN=AXX17_At2g12440 PE=3 SV=1;sp|Q8L7R2|KHSE_ARATH Homoserine kinase OS=Arabidopsis thaliana GN=HSK PE=1 SV=1;tr|A0A097PK69|A0A097PK69_ARATH Homoserine kinase (Fragment) OS=Arabidopsis thaliana PE=2	10.5	38.542	370	41236000	25241000	1.63369
A0A178VP11;Q9M354	Probable ADP-ribosylation factor GTPase-activating protein AGD6	AGD6	4	tr|A0A178VP11|A0A178VP11_ARATH AGD6 OS=Arabidopsis thaliana GN=AXX17_At3g48080 PE=4 SV=1;sp|Q9M354|AGD6_ARATH Probable ADP-ribosylation factor GTPase-activating protein AGD6 OS=Arabidopsis thaliana GN=AGD6 PE=1 SV=1	9.3	50.226	463	127400000	78039000	1.63252
Q9FGT8;A0A178US04		K21L19.6	4	sp|Q9FGT8|TIL_ARATH Temperature-induced lipocalin-1 OS=Arabidopsis thaliana GN=TIL PE=1 SV=1;tr|A0A178US04|A0A178US04_ARATH TIL OS=Arabidopsis thaliana GN=AXX17_At5g57400 PE=3 SV=1	22	21.434	186	94037000	57804000	1.62683
Q94JT5		At4g35220	4	tr|Q94JT5|Q94JT5_ARATH AT4g35220/F23E12_220 OS=Arabidopsis thaliana GN=At4g35220 PE=2 SV=1	16.9	29.987	272	44984000	27816000	1.6172
A0A178UXJ8;O48593	Asparagine--tRNA ligase, chloroplastic/mitochondrial	SYNO	1	tr|A0A178UXJ8|A0A178UXJ8_ARATH OVA8 OS=Arabidopsis thaliana GN=AXX17_At4g20360 PE=3 SV=1;sp|O48593|SYNO_ARATH Asparagine--tRNA ligase, chloroplastic/mitochondrial OS=Arabidopsis thaliana GN=SYNO PE=2 SV=3	2.4	66.132	587	3797500	2355600	1.61212
Q9FMM3;A0A178UGK6		At5g42950	3	tr|Q9FMM3|Q9FMM3_ARATH GYF domain-containing protein OS=Arabidopsis thaliana GN=At5g42950 PE=1 SV=1;tr|A0A178UGK6|A0A178UGK6_ARATH Uncharacterized protein OS=Arabidopsis thaliana GN=AXX17_At5g40890 PE=4 SV=1	2.6	187.62	1714	23467000	14719000	1.59433
Q5BQ23;A0ME58;Q9SYL4;Q5Q0I6		F3F20.18;At1g05730	4	tr|Q5BQ23|Q5BQ23_ARATH Uncharacterized protein OS=Arabidopsis thaliana GN=At1g05730 PE=2 SV=1;tr|A0ME58|A0ME58_ARATH Putative uncharacterized protein (Fragment) OS=Arabidopsis thaliana PE=2 SV=1;tr|Q9SYL4|Q9SYL4_ARATH F3F20.18 protein OS=Arabidopsis thalia	27.5	17.122	149	67990000	43129000	1.57643
A0A178WDE1;Q9C829	Nuclear pore complex protein NUP50A	NUP50A	4	tr|A0A178WDE1|A0A178WDE1_ARATH Uncharacterized protein OS=Arabidopsis thaliana GN=AXX17_At1g46670 PE=4 SV=1;sp|Q9C829|NU50A_ARATH Nuclear pore complex protein NUP50A OS=Arabidopsis thaliana GN=NUP50A PE=1 SV=1	12.5	46.534	440	154150000	99138000	1.5549
A0A178UN74;Q9ASS6	Photosynthetic NDH subunit of lumenal location 5, chloroplastic	PNSL5	13	tr|A0A178UN74|A0A178UN74_ARATH Peptidyl-prolyl cis-trans isomerase OS=Arabidopsis thaliana GN=AXX17_At5g12530 PE=3 SV=1;sp|Q9ASS6|PNSL5_ARATH Photosynthetic NDH subunit of lumenal location 5, chloroplastic OS=Arabidopsis thaliana GN=PNSL5 PE=1 SV=1	47.9	28.306	259	437580000	282190000	1.55066
O22694;Q9M1P5;Q6ID97;A0A178WFN4;A0A178VXE5;A0A178UGT9;Q9LYJ3;Q9LQC8;P36397;P0DH91	ADP-ribosylation factor 2-A;ADP-ribosylation factor 1;ADP-ribosylation factor 2-B	F8A5.3;T17J13.250;ARFA1F;T15N1_160;ARF2-A;ARF1;ARF2-B	1	tr|O22694|O22694_ARATH Putative ADP-ribolylation factor OS=Arabidopsis thaliana GN=F8A5.3 PE=4 SV=1;tr|Q9M1P5|Q9M1P5_ARATH ADP-ribosylation factor A1E OS=Arabidopsis thaliana GN=T17J13.250 PE=2 SV=1;tr|Q6ID97|Q6ID97_ARATH ADP-ribosylation factor A1F OS=Ara	9.7	12.691	113	4184500	2714400	1.54159
Q9LXD1;A0A178UBE7	Cytochrome b5 domain-containing protein RLF	RLF	7	sp|Q9LXD1|RLF_ARATH Cytochrome b5 domain-containing protein RLF OS=Arabidopsis thaliana GN=RLF PE=2 SV=1;tr|A0A178UBE7|A0A178UBE7_ARATH RLF OS=Arabidopsis thaliana GN=AXX17_At5g09210 PE=3 SV=1	29.4	23.697	211	77536000	51040000	1.51912
O04577		F19K23.5	1	tr|O04577|O04577_ARATH F19K23.5 protein OS=Arabidopsis thaliana GN=F19K23.5 PE=4 SV=1	1.4	72.881	648	2595500	1715800	1.51271
Q9SJ90;F4IFA9;Q8RY62		At2g04690	2	tr|Q9SJ90|Q9SJ90_ARATH Putative uncharacterized protein At2g04690 OS=Arabidopsis thaliana GN=At2g04690 PE=4 SV=1;tr|F4IFA9|F4IFA9_ARATH Pyridoxamine 5-phosphate oxidase family protein OS=Arabidopsis thaliana GN=At2g04690 PE=4 SV=1;tr|Q8RY62|Q8RY62_ARATH A	18.8	18.172	165	14791000	9807700	1.5081
O82320		At2g25770	4	tr|O82320|O82320_ARATH At2g25770 OS=Arabidopsis thaliana GN=At2g25770 PE=2 SV=1	22.8	18.798	167	57704000	38276000	1.50758
A0A178U8Q4;Q9ZSK4;F4JXD5	Actin-depolymerizing factor 3	ADF3	22	tr|A0A178U8Q4|A0A178U8Q4_ARATH ADF3 OS=Arabidopsis thaliana GN=AXX17_At5g59320 PE=3 SV=1;sp|Q9ZSK4|ADF3_ARATH Actin-depolymerizing factor 3 OS=Arabidopsis thaliana GN=ADF3 PE=1 SV=1;tr|F4JXD5|F4JXD5_ARATH Actin depolymerizing factor 3 OS=Arabidopsis thalia	89.9	15.922	139	90964000000	60559000000	1.50207
Q9C8M2	Peptide methionine sulfoxide reductase B1, chloroplastic	MSRB1	3	sp|Q9C8M2|MSRB1_ARATH Peptide methionine sulfoxide reductase B1, chloroplastic OS=Arabidopsis thaliana GN=MSRB1 PE=1 SV=1	14.9	22.607	202	67453000	45077000	1.4964
A0A178VK06;Q9M837		T27C4.15	3	tr|A0A178VK06|A0A178VK06_ARATH Uncharacterized protein OS=Arabidopsis thaliana GN=AXX17_At3g03930 PE=4 SV=1;tr|Q9M837|Q9M837_ARATH Putative RRM-containing protein OS=Arabidopsis thaliana GN=T27C4.15 PE=2 SV=1	15.6	20.242	186	27053000	18229000	1.48406
A0A178U7Q6;Q9LFU9	Glucosamine 6-phosphate N-acetyltransferase	GNA1	1	tr|A0A178U7Q6|A0A178U7Q6_ARATH GNA1 OS=Arabidopsis thaliana GN=AXX17_At5g15320 PE=4 SV=1;sp|Q9LFU9|GNA1_ARATH Glucosamine 6-phosphate N-acetyltransferase OS=Arabidopsis thaliana GN=GNA1 PE=1 SV=1	8.1	17.028	149	10161000	6862800	1.48059
A0A178VLU2;F4J849;Q9LFA3	Probable monodehydroascorbate reductase, cytoplasmic isoform 3	MDAR1	15	tr|A0A178VLU2|A0A178VLU2_ARATH MDAR1 OS=Arabidopsis thaliana GN=AXX17_At3g47290 PE=4 SV=1;tr|F4J849|F4J849_ARATH Monodehydroascorbate reductase (NADH) OS=Arabidopsis thaliana GN=MDAR1 PE=1 SV=1;sp|Q9LFA3|MDAR1_ARATH Monodehydroascorbate reductase 1, peroxi	31.3	46.487	434	994440000	676950000	1.469
A0A178V4H6;O49597	High mobility group B protein 5	HMGB5	7	tr|A0A178V4H6|A0A178V4H6_ARATH NFD5 OS=Arabidopsis thaliana GN=AXX17_At4g40610 PE=4 SV=1;sp|O49597|HMGB5_ARATH High mobility group B protein 5 OS=Arabidopsis thaliana GN=HMGB5 PE=2 SV=1	53.6	14.203	125	1915000000	1315700000	1.4555
A0A178UGM5;Q9FPJ8	Polyadenylate-binding protein RBP45A	RBP45A	3	tr|A0A178UGM5|A0A178UGM5_ARATH RBP45A OS=Arabidopsis thaliana GN=AXX17_At5g54030 PE=4 SV=1;sp|Q9FPJ8|RB45A_ARATH Polyadenylate-binding protein RBP45A OS=Arabidopsis thaliana GN=RBP45A PE=2 SV=1	10.9	42.314	387	42579000	29294000	1.45351
A0A178WG41;Q9LNV5	Zinc finger CCCH domain-containing protein 4		1	tr|A0A178WG41|A0A178WG41_ARATH MAC5A OS=Arabidopsis thaliana GN=AXX17_At1g06990 PE=4 SV=1;sp|Q9LNV5|C3H4_ARATH Zinc finger CCCH domain-containing protein 4 OS=Arabidopsis thaliana GN=At1g07360 PE=2 SV=1	3.1	53.557	481	5622800	3895800	1.4433
A0A178UKL8;Q9LYU3	Ethylene-responsive transcription factor ERF113	ERF113	1	tr|A0A178UKL8|A0A178UKL8_ARATH Rap2.6L OS=Arabidopsis thaliana GN=AXX17_At5g12750 PE=4 SV=1;sp|Q9LYU3|EF113_ARATH Ethylene-responsive transcription factor ERF113 OS=Arabidopsis thaliana GN=ERF113 PE=2 SV=1	7.1	24.287	212	7281000	5190300	1.40281
A0A178UAE4;Q9LVU1	Vesicle-associated protein 2-1;Vesicle-associated protein 2-1, N-terminally processed	PVA21	1	tr|A0A178UAE4|A0A178UAE4_ARATH Uncharacterized protein OS=Arabidopsis thaliana GN=AXX17_At5g45670 PE=4 SV=1;sp|Q9LVU1|VAP21_ARATH Vesicle-associated protein 2-1 OS=Arabidopsis thaliana GN=PVA21 PE=1 SV=1	5	24.667	220	2787500	1987900	1.40223
A8MSB9;F4JTU2;A0A178UU67;Q9SVM8	Glycine-rich RNA-binding protein 2, mitochondrial	GR-RBP2;RBG2	1	tr|A8MSB9|A8MSB9_ARATH Glycine-rich RNA-binding protein 2 OS=Arabidopsis thaliana GN=GR-RBP2 PE=4 SV=1;tr|F4JTU2|F4JTU2_ARATH Glycine-rich RNA-binding protein 2 OS=Arabidopsis thaliana GN=GR-RBP2 PE=4 SV=1;tr|A0A178UU67|A0A178UU67_ARATH GRP2 OS=Arabidopsis	8.3	14.691	144	1064700	767850	1.3866
A0A178WC81;Q9FWS3	Zinc finger CCCH domain-containing protein 16	CG1	1	tr|A0A178WC81|A0A178WC81_ARATH Uncharacterized protein OS=Arabidopsis thaliana GN=AXX17_At1g69790 PE=4 SV=1;sp|Q9FWS3|C3H16_ARATH Zinc finger CCCH domain-containing protein 16 OS=Arabidopsis thaliana GN=CG1 PE=1 SV=2	3.7	34.224	321	4730800	3460200	1.3672
Q541X0;Q9SFC6	Rho GDP-dissociation inhibitor 1	GDI1	1	tr|Q541X0|Q541X0_ARATH Putative RHO GDP-dissociation inhibitor 1 OS=Arabidopsis thaliana GN=At3g07880 PE=2 SV=1;sp|Q9SFC6|GDIR_ARATH Rho GDP-dissociation inhibitor 1 OS=Arabidopsis thaliana GN=GDI1 PE=1 SV=1	5.8	27.231	240	4936200	3685100	1.3395
A0A178VRA7;O82169	Multiple organellar RNA editing factor 6, mitochondrial	MORF6	6	tr|A0A178VRA7|A0A178VRA7_ARATH MORF6 OS=Arabidopsis thaliana GN=AXX17_At2g31820 PE=4 SV=1;sp|O82169|MORF6_ARATH Multiple organellar RNA editing factor 6, mitochondrial OS=Arabidopsis thaliana GN=MORF6 PE=2 SV=1	20.3	26.368	232	1063600000	797740000	1.33327
A0A178VYR1;O80925	ADP-ribosylation factor GTPase-activating protein AGD7	AGD7	12	tr|A0A178VYR1|A0A178VYR1_ARATH ASP1 OS=Arabidopsis thaliana GN=AXX17_At2g34350 PE=4 SV=1;sp|O80925|AGD7_ARATH ADP-ribosylation factor GTPase-activating protein AGD7 OS=Arabidopsis thaliana GN=AGD7 PE=1 SV=1	21.9	49.251	456	266660000	201100000	1.32601
A0A178UTL3;Q9T0K7	3-hydroxyisobutyryl-CoA hydrolase-like protein 3, mitochondrial		4	tr|A0A178UTL3|A0A178UTL3_ARATH Uncharacterized protein OS=Arabidopsis thaliana GN=AXX17_At4g15150 PE=3 SV=1;sp|Q9T0K7|HIBC6_ARATH 3-hydroxyisobutyryl-CoA hydrolase-like protein 3, mitochondrial OS=Arabidopsis thaliana GN=At4g13360 PE=1 SV=2	13.1	41.433	381	8349700	6520000	1.28063
G1C2Z0;G1C2S9;F4IMB5;P92549	ATP synthase subunit alpha;ATP synthase subunit alpha, mitochondrial	atp1;At2g07698;ATPA	1	tr|G1C2Z0|G1C2Z0_ARATH ATP synthase subunit alpha OS=Arabidopsis thaliana GN=atp1 PE=3 SV=1;tr|G1C2S9|G1C2S9_ARATH ATP synthase subunit alpha OS=Arabidopsis thaliana GN=atp1 PE=3 SV=1;tr|F4IMB5|F4IMB5_ARATH ATPase, F1 complex, alpha subunit protein OS=Arab	2.2	54.971	507	3136800	2453100	1.27871
Q8LAJ4;Q9FJM1			1	tr|Q8LAJ4|Q8LAJ4_ARATH 26S proteasome non-ATPase regulatory subunit 9 OS=Arabidopsis thaliana GN=At5g57950 PE=2 SV=1;tr|Q9FJM1|Q9FJM1_ARATH Putative uncharacterized protein OS=Arabidopsis thaliana PE=4 SV=1	5.7	24.262	227	13683000	10738000	1.27426
Q9ASR1;A0A178WBS0		T6H22.13	3	sp|Q9ASR1|EF2_ARATH Elongation factor 2 OS=Arabidopsis thaliana GN=LOS1 PE=1 SV=1;tr|A0A178WBS0|A0A178WBS0_ARATH LOS1 OS=Arabidopsis thaliana GN=AXX17_At1g50740 PE=4 SV=1	4.9	93.89	843	52082000	40984000	1.27079
Q0WUY5;A0A178V7J2		At3g07660	3	tr|Q0WUY5|Q0WUY5_ARATH Putative uncharacterized protein At3g07660 OS=Arabidopsis thaliana GN=At3g07660 PE=1 SV=1;tr|A0A178V7J2|A0A178V7J2_ARATH Uncharacterized protein OS=Arabidopsis thaliana GN=AXX17_At3g07660 PE=4 SV=1	3.1	90.075	841	26797000	21264000	1.26021
Q8LEI7;F4K1Y4;Q9FME2;A0A178U9D2;A0A178U8D7		At5g60980	1	tr|Q8LEI7|Q8LEI7_ARATH Ras-GTPase-activating protein SH3-domain binding protein-like OS=Arabidopsis thaliana GN=At5g60980 PE=2 SV=1;tr|F4K1Y4|F4K1Y4_ARATH Nuclear transport factor 2 and RNA recognition motif domain-containing protein OS=Arabidopsis thalian	3.1	49.399	459	14746000	11796000	1.25008
A0A178VTH6;Q9SLA8	Enoyl-[acyl-carrier-protein] reductase [NADH], chloroplastic	MOD1	4	tr|A0A178VTH6|A0A178VTH6_ARATH MOD1 OS=Arabidopsis thaliana GN=AXX17_At2g05030 PE=4 SV=1;sp|Q9SLA8|FABI_ARATH Enoyl-[acyl-carrier-protein] reductase [NADH], chloroplastic OS=Arabidopsis thaliana GN=MOD1 PE=1 SV=1	11.8	41.19	390	52204000	42032000	1.24201
A0A178UNF0;A0A178ULL5;Q9FG30	Zinc finger CCCH domain-containing protein 52		1	tr|A0A178UNF0|A0A178UNF0_ARATH Uncharacterized protein OS=Arabidopsis thaliana GN=AXX17_At5g06390 PE=4 SV=1;tr|A0A178ULL5|A0A178ULL5_ARATH Uncharacterized protein OS=Arabidopsis thaliana GN=AXX17_At5g06390 PE=4 SV=1;sp|Q9FG30|C3H52_ARATH Zinc finger CCCH d	8	22.702	213	3809400	3073500	1.23943
Q8RV68		At2g31725	17	tr|Q8RV68|Q8RV68_ARATH Expressed protein OS=Arabidopsis thaliana GN=At2g31725 PE=2 SV=1	79.2	17.488	149	7917500000	6473000000	1.22316
A0A178VD86;Q42214;A0A178W3S3;O64955;F4JGM3;Q8LDD7;A0A178VL95;A0A178WHK4;A0A178W1F2;A0A178VYW3;A0A178V9X1;A6XI99;A6XIA0;A6XIA1;Q94B30;Q8LBW0;Q8H0Y0;Q6KFS0;Q6KFR9;Q6KFR8;Q6KFR7;A0A178W2G5;O49976;J7FN14;A0A178W444;F4I9X6;A0A178UDC6;Q7GAQ5;Q6KFS4;Q6KFS3;Q6KFS2;Q6KFS1;Q0WRN6;O49977;Q93ZJ0;Q3EAA5;A0A178UPB8;Q9SAQ6;A0A178V0T6;A0A178UL32;Q42202;B9DHA6;Q8RUC6;Q9SHE7;P59271;P59233;P59232;P0CH33;Q3E7K8;Q3E7…	Ubiquitin-60S ribosomal protein L40-2;Ubiquitin;60S ribosomal protein L40-2;Ubiquitin-60S ribosomal protein L40-1;Ubiquitin;60S ribosomal protein L40-1;Ubiquitin-NEDD8-like protein RUB2;Ubiquitin;NEDD8-like protein RUB2;Ubiquitin-NEDD8-like protein RUB1;Ubiquitin;NEDD8-like protein RUB1;Ubiquitin-40S ribosomal protein S27a-1;Ubiquitin;40S ribosomal protein S27a-1;Ubiquitin-40S ribosomal protein S…	SEN3;UBQ11;UBQ10;UBQ3;UBQ13;T8F5.13;At5g20620;RPL40B;RPL40A;RUB2;RUB1;RPS27AA;RPS27AC;RPS27AB;UBQ12;UBQ14;UBQ9;UBQ4;UBQ8	2	tr|A0A178VD86|A0A178VD86_ARATH Uncharacterized protein OS=Arabidopsis thaliana GN=AXX17_At3g47040 PE=4 SV=1;tr|Q42214|Q42214_ARATH Ubiquitin (Fragment) OS=Arabidopsis thaliana PE=2 SV=1;tr|A0A178W3S3|A0A178W3S3_ARATH Uncharacterized protein OS=Arabidopsis	31.6	11.189	98	4414900	3609800	1.22303
Q8VYQ0;Q9LNH0		At1g48170	17	tr|Q8VYQ0|Q8VYQ0_ARATH Putative uncharacterized protein At1g48170 OS=Arabidopsis thaliana GN=At1g48170 PE=1 SV=1;tr|Q9LNH0|Q9LNH0_ARATH F21D18.10 OS=Arabidopsis thaliana PE=4 SV=1	84.3	16.597	153	1898600000	1560200000	1.2169
O22831;A0A178VW92		At2g43720	9	tr|O22831|O22831_ARATH At2g43720/F18O19.17 OS=Arabidopsis thaliana GN=At2g43720 PE=1 SV=1;tr|A0A178VW92|A0A178VW92_ARATH Uncharacterized protein OS=Arabidopsis thaliana GN=AXX17_At2g41240 PE=4 SV=1	64.6	16.912	147	2268300000	1868600000	1.2139
Q93W05;Q9XIJ0;Q9SGZ2		At1g10590	6	tr|Q93W05|Q93W05_ARATH At1g10590/F20B24_1 OS=Arabidopsis thaliana GN=At1g10590 PE=1 SV=1;tr|Q9XIJ0|Q9XIJ0_ARATH Nucleic acid-binding, OB-fold-like protein OS=Arabidopsis thaliana GN=At1g10590 PE=1 SV=1;tr|Q9SGZ2|Q9SGZ2_ARATH F20B24.1 OS=Arabidopsis thalian	36.7	15.455	139	382460000	316010000	1.21028
F4IIZ8;A0A178VTV7		At2g40815	2	tr|F4IIZ8|F4IIZ8_ARATH Calcium-dependent lipid-binding (CaLB domain) family protein OS=Arabidopsis thaliana GN=At2g40815 PE=4 SV=1;tr|A0A178VTV7|A0A178VTV7_ARATH Uncharacterized protein OS=Arabidopsis thaliana GN=AXX17_At2g37970 PE=4 SV=1	6.8	39.678	367	5235900	4355300	1.20219
Q9M328;Q8LC99		F5K20_290;At3g53990	9	tr|Q9M328|Q9M328_ARATH AT3G53990 protein OS=Arabidopsis thaliana GN=F5K20_290 PE=2 SV=1;tr|Q8LC99|Q8LC99_ARATH Adenine nucleotide alpha hydrolases-like superfamily protein OS=Arabidopsis thaliana GN=At3g53990 PE=2 SV=1	60.6	17.793	160	278230000	231970000	1.19942
Q93WL3;A0A178UW23		At4g25370	3	sp|Q93WL3|CLPT1_ARATH ATP-dependent Clp protease ATP-binding subunit CLPT1, chloroplastic OS=Arabidopsis thaliana GN=CLPT1 PE=1 SV=1;tr|A0A178UW23|A0A178UW23_ARATH Uncharacterized protein OS=Arabidopsis thaliana GN=AXX17_At4g29290 PE=4 SV=1	12.6	26.05	238	22123000	18458000	1.19856
Q541Y4;Q9LNH6	Novel plant SNARE 12	NPSN12	4	tr|Q541Y4|Q541Y4_ARATH NPSN12 OS=Arabidopsis thaliana GN=At1g48240 PE=2 SV=1;sp|Q9LNH6|NPS12_ARATH Novel plant SNARE 12 OS=Arabidopsis thaliana GN=NPSN12 PE=2 SV=1	12.5	29.887	265	34751000	29118000	1.19345
Q8LBD4;F4J9U9;Q9LTX1;A0A178VKF6;Q9C7B4		At3g12640;T2E22.5	1	tr|Q8LBD4|Q8LBD4_ARATH Putative uncharacterized protein OS=Arabidopsis thaliana PE=2 SV=1;tr|F4J9U9|F4J9U9_ARATH RNA binding (RRM/RBD/RNP motifs) family protein OS=Arabidopsis thaliana GN=At3g12640 PE=1 SV=1;tr|Q9LTX1|Q9LTX1_ARATH Uncharacterized protein O	5.6	34.581	320	11595000	9745500	1.18978
A0A178UWH6;Q42406	Peptidyl-prolyl cis-trans isomerase CYP18-4	CYP18-4	10	tr|A0A178UWH6|A0A178UWH6_ARATH Peptidyl-prolyl cis-trans isomerase OS=Arabidopsis thaliana GN=AXX17_At4g39850 PE=3 SV=1;sp|Q42406|CP18D_ARATH Peptidyl-prolyl cis-trans isomerase CYP18-4 OS=Arabidopsis thaliana GN=CYP18-4 PE=1 SV=1	54.7	18.378	172	432660000	365210000	1.18469
Q9SAJ4;A0A178WHC3	Phosphoglycerate kinase	T8K14.3	9	sp|Q9SAJ4|PGKY3_ARATH Phosphoglycerate kinase 3, cytosolic OS=Arabidopsis thaliana GN=PGK3 PE=1 SV=1;tr|A0A178WHC3|A0A178WHC3_ARATH Phosphoglycerate kinase OS=Arabidopsis thaliana GN=AXX17_At1g74350 PE=3 SV=1	26.7	42.131	401	225270000	190930000	1.17986
A0A178WIM4;F4I403;Q8LAH7	12-oxophytodienoate reductase 1	OPR1	13	tr|A0A178WIM4|A0A178WIM4_ARATH OPR1 OS=Arabidopsis thaliana GN=AXX17_At1g71160 PE=4 SV=1;tr|F4I403|F4I403_ARATH 12-oxophytodienoate reductase 1 OS=Arabidopsis thaliana GN=OPR1 PE=4 SV=1;sp|Q8LAH7|OPR1_ARATH 12-oxophytodienoate reductase 1 OS=Arabidopsis th	35.8	41.167	372	476440000	405970000	1.17358
A0A178WJ33;P57752	Acyl-CoA-binding domain-containing protein 6	ACBP6	2	tr|A0A178WJ33|A0A178WJ33_ARATH ACBP6 OS=Arabidopsis thaliana GN=AXX17_At1g32410 PE=4 SV=1;sp|P57752|ACBP6_ARATH Acyl-CoA-binding domain-containing protein 6 OS=Arabidopsis thaliana GN=ACBP6 PE=1 SV=1	26.1	10.386	92	9236500	7874800	1.17292
Q0WW53;Q9SVE8;Q8LCU4		At4g38370;F22I13.140	5	tr|Q0WW53|Q0WW53_ARATH Phosphoglycerate mutase-like protein OS=Arabidopsis thaliana GN=At4g38370 PE=1 SV=1;tr|Q9SVE8|Q9SVE8_ARATH Putative uncharacterized protein AT4g38370 OS=Arabidopsis thaliana GN=F22I13.140 PE=4 SV=1;tr|Q8LCU4|Q8LCU4_ARATH Uncharacteri	23.6	25.256	225	33885000	29287000	1.157
A0A178W619;Q8W593	Probable lactoylglutathione lyase, chloroplast		4	tr|A0A178W619|A0A178W619_ARATH Uncharacterized protein OS=Arabidopsis thaliana GN=AXX17_At1g61190 PE=4 SV=1;sp|Q8W593|LGUC_ARATH Probable lactoylglutathione lyase, chloroplastic OS=Arabidopsis thaliana GN=At1g67280 PE=1 SV=1	13.1	39.167	350	25387000	22261000	1.14042
A0A178VJ44;Q9SN85	Pentatricopeptide repeat-containing protein At3g47530	PCMP-H76	1	tr|A0A178VJ44|A0A178VJ44_ARATH Uncharacterized protein OS=Arabidopsis thaliana GN=AXX17_At3g41520 PE=4 SV=1;sp|Q9SN85|PP267_ARATH Pentatricopeptide repeat-containing protein At3g47530 OS=Arabidopsis thaliana GN=PCMP-H76 PE=2 SV=1	1.7	66.328	591	4244000	3724900	1.13936
Q56X34;C0Z349;A0A178UHK7;Q9S7E4	Formate dehydrogenase, mitochondrial	At5g14780;FDH1	2	tr|Q56X34|Q56X34_ARATH Formate dehydrogenase OS=Arabidopsis thaliana GN=At5g14780 PE=2 SV=1;tr|C0Z349|C0Z349_ARATH AT5G14780 protein OS=Arabidopsis thaliana GN=At5g14780 PE=2 SV=1;tr|A0A178UHK7|A0A178UHK7_ARATH Formate dehydrogenase, mitochondrial OS=Arabi	13	17.213	154	14440000	12751000	1.13246
A0A178UZE9;Q9SZH4	RNA-binding KH domain-containing protein PEPPER	PEP	1	tr|A0A178UZE9|A0A178UZE9_ARATH PEP OS=Arabidopsis thaliana GN=AXX17_At4g30000 PE=4 SV=1;sp|Q9SZH4|PEP_ARATH RNA-binding KH domain-containing protein PEPPER OS=Arabidopsis thaliana GN=PEP PE=1 SV=1	3.6	53.984	495	4514600	4141000	1.09022
Q9LSP5		At3g17020	9	tr|Q9LSP5|Q9LSP5_ARATH AT3g17020/K14A17_14 OS=Arabidopsis thaliana GN=At3g17020 PE=2 SV=1	51.5	17.775	163	648260000	608720000	1.06496
C0SUT1;Q94AD9;Q570S8	Zinc finger CCCH domain-containing protein 3	At1g04990	2	tr|C0SUT1|C0SUT1_ARATH Putative uncharacterized protein At1g04990 (Fragment) OS=Arabidopsis thaliana GN=At1g04990 PE=2 SV=1;sp|Q94AD9|C3H3_ARATH Zinc finger CCCH domain-containing protein 3 OS=Arabidopsis thaliana GN=At1g04990 PE=2 SV=1;tr|Q570S8|Q570S8_AR	5.4	44.704	404	8477100	8128800	1.04285
Q8LAE7			2	tr|Q8LAE7|Q8LAE7_ARATH Uncharacterized protein OS=Arabidopsis thaliana GN=AXX17_At5g02610 PE=2 SV=1	11.7	18.802	171	70234000	67393000	1.04216
A0A178UBY6;A0A178UAR7;Q6BDA0	Probable lysine-specific demethylase ELF6	ELF6	1	tr|A0A178UBY6|A0A178UBY6_ARATH ELF6 OS=Arabidopsis thaliana GN=AXX17_At5g03630 PE=4 SV=1;tr|A0A178UAR7|A0A178UAR7_ARATH ELF6 OS=Arabidopsis thaliana GN=AXX17_At5g03630 PE=4 SV=1;sp|Q6BDA0|ELF6_ARATH Probable lysine-specific demethylase ELF6 OS=Arabidopsis	1.2	102.05	911	11435000	11054000	1.03447
B3H4J9;Q6UYC0;Q39246;Q9SPW1;Q9SPW0;Q9SPV9;Q9SPV8;Q9SPV7;Q9S731;Q39245;A0A178WLS8;A0A178UCR7;A0A178WJV7;Q42527;Q42440	N-(5-phosphoribosyl)anthranilate isomerase 2, chloroplastic;N-(5-phosphoribosyl)anthranilate isomerase 1, chloroplastic	PAI1;PAI4;PAI4*;PAI2	1	tr|B3H4J9|B3H4J9_ARATH Phosphoribosylanthranilate isomerase OS=Arabidopsis thaliana GN=PAI1 PE=3 SV=1;tr|Q6UYC0|Q6UYC0_ARATH Phosphoribosylanthranilate isomerase OS=Arabidopsis thaliana GN=PAI1 PE=3 SV=1;tr|Q39246|Q39246_ARATH Phosphoribosylanthranilate is	5.6	23.357	213	7002300	6772100	1.03399
A0A178VS42;O22793	Multiple organellar RNA editing factor 2, chloroplastic	MORF2	2	tr|A0A178VS42|A0A178VS42_ARATH MORF2 OS=Arabidopsis thaliana GN=AXX17_At2g29890 PE=4 SV=1;sp|O22793|MORF2_ARATH Multiple organellar RNA editing factor 2, chloroplastic OS=Arabidopsis thaliana GN=MORF2 PE=1 SV=1	12.8	24.715	219	68159000	66315000	1.02781
F4IX28;A0A178VJX5;F4IX26;P34791	Peptidyl-prolyl cis-trans isomerase;Peptidyl-prolyl cis-trans isomerase CYP20-3, chloroplastic	ROC4;CYP20-3	8	tr|F4IX28|F4IX28_ARATH Peptidyl-prolyl cis-trans isomerase OS=Arabidopsis thaliana GN=ROC4 PE=3 SV=1;tr|A0A178VJX5|A0A178VJX5_ARATH Peptidyl-prolyl cis-trans isomerase OS=Arabidopsis thaliana GN=AXX17_At3g56320 PE=3 SV=1;tr|F4IX26|F4IX26_ARATH Peptidyl-pro	39.4	28.079	259	484410000	477070000	1.01539
Q8L8Q4;Q8GX81			1	tr|Q8L8Q4|Q8L8Q4_ARATH Bcnt-like protein OS=Arabidopsis thaliana PE=2 SV=1;tr|Q8GX81|Q8GX81_ARATH At5g30145 OS=Arabidopsis thaliana GN=At5g30490 PE=2 SV=1	5.1	26.054	236	3245400	3204400	1.01279
A0A178VHP9;Q9LKA5	Multiple organellar RNA editing factor 8, chloroplastic/mitochondrial	MORF8	11	tr|A0A178VHP9|A0A178VHP9_ARATH RIP1 OS=Arabidopsis thaliana GN=AXX17_At3g15640 PE=4 SV=1;sp|Q9LKA5|MORF8_ARATH Multiple organellar RNA editing factor 8, chloroplastic/mitochondrial OS=Arabidopsis thaliana GN=MORF8 PE=1 SV=1	20.3	42.859	395	1261700000	1246200000	1.01244
A0A178WF52;Q9C7Y2	Multiple organellar RNA editing factor 5, mitochondrial	MORF5	2	tr|A0A178WF52|A0A178WF52_ARATH Uncharacterized protein OS=Arabidopsis thaliana GN=AXX17_At1g33360 PE=4 SV=1;sp|Q9C7Y2|MORF5_ARATH Multiple organellar RNA editing factor 5, mitochondrial OS=Arabidopsis thaliana GN=MORF5 PE=2 SV=1	6.1	26.058	229	305500000	318080000	0.96045
A0A178W0B3;O80501;A0A178VS36;A0A178UPG4;Q9SID8;Q9LFT9	Ras-related protein RABH1b;Ras-related protein RABH1d;Ras-related protein RABH1e	RABH1B;RABH1D;RABH1E	11	tr|A0A178W0B3|A0A178W0B3_ARATH RAB6A OS=Arabidopsis thaliana GN=AXX17_At2g42180 PE=4 SV=1;sp|O80501|RAH1B_ARATH Ras-related protein RABH1b OS=Arabidopsis thaliana GN=RABH1B PE=1 SV=1;tr|A0A178VS36|A0A178VS36_ARATH RABH1d OS=Arabidopsis thaliana GN=AXX17_At	50.5	23.13	208	213640000	224430000	0.951923
Q8VZS6;A0A178VMU4		GIP1	2	sp|Q8VZS6|GIP1_ARATH GBF-interacting protein 1 OS=Arabidopsis thaliana GN=GIP1 PE=1 SV=1;tr|A0A178VMU4|A0A178VMU4_ARATH GIP1 OS=Arabidopsis thaliana GN=AXX17_At3g13390 PE=4 SV=1	5.8	61.812	567	4993800	5318900	0.938878
F4JPR4;O23230;A0A178UVV2		At4g36520;C7A10.840	1	tr|F4JPR4|F4JPR4_ARATH Chaperone DnaJ-domain containing protein OS=Arabidopsis thaliana GN=At4g36520 PE=4 SV=1;tr|O23230|O23230_ARATH Trichohyalin like protein OS=Arabidopsis thaliana GN=C7A10.840 PE=4 SV=2;tr|A0A178UVV2|A0A178UVV2_ARATH Uncharacterized pr	0.8	162.91	1422	9334600	9962900	0.936936
A0A178UA44;A0A178UCW4;Q9FIC3	Protein BOLA2	BOLA2	1	tr|A0A178UA44|A0A178UA44_ARATH Uncharacterized protein OS=Arabidopsis thaliana GN=AXX17_At5g09390 PE=4 SV=1;tr|A0A178UCW4|A0A178UCW4_ARATH Uncharacterized protein OS=Arabidopsis thaliana GN=AXX17_At5g09390 PE=3 SV=1;sp|Q9FIC3|BOLA2_ARATH Protein BOLA2 OS=A	38.2	3.9406	34	6002300	6410700	0.936294
Q8LD45;Q8H789;Q9SGZ6		At1g78040	5	tr|Q8LD45|Q8LD45_ARATH Allergen, putative OS=Arabidopsis thaliana GN=At1g78040 PE=2 SV=1;tr|Q8H789|Q8H789_ARATH Putative uncharacterized protein (Fragment) OS=Arabidopsis thaliana PE=2 SV=1;tr|Q9SGZ6|Q9SGZ6_ARATH F28K19.26 OS=Arabidopsis thaliana PE=3 SV=1	27.5	19.275	171	129380000	138700000	0.932805
Q9LYK7;A0A178ULJ1	Pescadillo homolog	T15N1_10	2	sp|Q9LYK7|PESC_ARATH Pescadillo homolog OS=Arabidopsis thaliana GN=PES PE=1 SV=1;tr|A0A178ULJ1|A0A178ULJ1_ARATH Pescadillo homolog OS=Arabidopsis thaliana GN=AXX17_At5g14010 PE=3 SV=1	1.9	67.943	590	37334000	40181000	0.929146
B9DHX4;A0A178W4H0;P93819	Malate dehydrogenase;Malate dehydrogenase, cytoplasmic 1	At1g04410;MDH1	10	tr|B9DHX4|B9DHX4_ARATH Malate dehydrogenase (Fragment) OS=Arabidopsis thaliana GN=At1g04410 PE=2 SV=1;tr|A0A178W4H0|A0A178W4H0_ARATH Malate dehydrogenase OS=Arabidopsis thaliana GN=AXX17_At1g03690 PE=3 SV=1;sp|P93819|MDHC1_ARATH Malate dehydrogenase 1, cyt	57.3	26.078	239	101240000	112000000	0.903929
A0A178W943;P0DI06;P0DI05;P0DI04;P0DI03;P0DI02	F-box/kelch-repeat protein At1g25211;F-box/kelch-repeat protein At1g25150;F-box/kelch-repeat protein At1g25055;F-box/kelch-repeat protein At1g24881;F-box/kelch-repeat protein At1g24800		1	tr|A0A178W943|A0A178W943_ARATH Uncharacterized protein OS=Arabidopsis thaliana GN=AXX17_At1g25980 PE=4 SV=1;sp|P0DI06|FBK14_ARATH F-box/kelch-repeat protein At1g25211 OS=Arabidopsis thaliana GN=At1g25211 PE=4 SV=1;sp|P0DI05|FBK13_ARATH F-box/kelch-repeat p	2.1	49.643	433	14413000	16053000	0.897838
A0A178UKG2;A0A178UL24;Q9FMM0	Probable ubiquitin-conjugating enzyme E2 18	UBC18	1	tr|A0A178UKG2|A0A178UKG2_ARATH UBC18 OS=Arabidopsis thaliana GN=AXX17_At5g40930 PE=3 SV=1;tr|A0A178UL24|A0A178UL24_ARATH UBC18 OS=Arabidopsis thaliana GN=AXX17_At5g40930 PE=3 SV=1;sp|Q9FMM0|UBC18_ARATH Probable ubiquitin-conjugating enzyme E2 18 OS=Arabido	10	15.776	140	6876700	7701100	0.89295
A0A178VU31;Q9SKZ3	40S ribosomal protein S12-2	RPS12C	10	tr|A0A178VU31|A0A178VU31_ARATH 40S ribosomal protein S12 OS=Arabidopsis thaliana GN=AXX17_At2g28360 PE=3 SV=1;sp|Q9SKZ3|RS122_ARATH 40S ribosomal protein S12-2 OS=Arabidopsis thaliana GN=RPS12C PE=1 SV=1	59	15.329	144	337980000	382240000	0.884209
A8MRW0;B9DHH7;Q9SA23	Syntaxin-51	SYP51;At1g16240	1	tr|A8MRW0|A8MRW0_ARATH Syntaxin-51 OS=Arabidopsis thaliana GN=SYP51 PE=3 SV=1;tr|B9DHH7|B9DHH7_ARATH AT1G16240 protein OS=Arabidopsis thaliana GN=At1g16240 PE=2 SV=1;sp|Q9SA23|SYP51_ARATH Syntaxin-51 OS=Arabidopsis thaliana GN=SYP51 PE=1 SV=1	6.1	25.523	228	6467900	7399000	0.874159
F4IIG6;W8QNZ5;A0A178VZ23;Q7Y232;W8Q735;F4IIG3;Q9ZQG4	UDP-glycosyltransferase 73B4;UDP-glycosyltransferase 73B5	UGT73B4;AT2G15490;AT2G15480;UGT73B5	3	tr|F4IIG6|F4IIG6_ARATH Glycosyltransferase OS=Arabidopsis thaliana GN=UGT73B4 PE=3 SV=1;tr|W8QNZ5|W8QNZ5_ARATH Glycosyltransferase (Fragment) OS=Arabidopsis thaliana GN=AXX17_At2g10680 PE=2 SV=1;tr|A0A178VZ23|A0A178VZ23_ARATH Glycosyltransferase OS=Arabido	7.9	53.703	481	11667000	13427000	0.868921
A0A178UJT7;Q9ZSK3	Actin-depolymerizing factor 4	ADF4	19	tr|A0A178UJT7|A0A178UJT7_ARATH ATADF4 OS=Arabidopsis thaliana GN=AXX17_At5g59330 PE=3 SV=1;sp|Q9ZSK3|ADF4_ARATH Actin-depolymerizing factor 4 OS=Arabidopsis thaliana GN=ADF4 PE=1 SV=2	87.8	16.034	139	42253000000	49450000000	0.854459
A0A178WED9;Q9FXI5	Protein IQ-DOMAIN 32	IQD32	1	tr|A0A178WED9|A0A178WED9_ARATH Iqd32 OS=Arabidopsis thaliana GN=AXX17_At1g20840 PE=4 SV=1;sp|Q9FXI5|IQD32_ARATH Protein IQ-DOMAIN 32 OS=Arabidopsis thaliana GN=IQD32 PE=1 SV=3	2.3	86.881	794	1924000	2276100	0.845306
O49553		F7J7.50	22	tr|O49553|O49553_ARATH AT4g21110/F7J7_50 OS=Arabidopsis thaliana GN=F7J7.50 PE=2 SV=1	80.7	17.187	145	2256600000	2684500000	0.840603
A0A178WCH3;Q9FWT2	Probable ubiquitin-conjugating enzyme E2 16	UBC16	1	tr|A0A178WCH3|A0A178WCH3_ARATH UBC16 OS=Arabidopsis thaliana GN=AXX17_At1g69910 PE=3 SV=1;sp|Q9FWT2|UBC16_ARATH Probable ubiquitin-conjugating enzyme E2 16 OS=Arabidopsis thaliana GN=UBC16 PE=2 SV=1	8.7	18.485	161	4331400	5228500	0.828421
A0A0G4NSG5;Q9FMY7	Zinc-finger homeodomain protein 13	ZHD13	1	tr|A0A0G4NSG5|A0A0G4NSG5_ARATH Homeobox protein 27 OS=Arabidopsis thaliana GN=AtHB27 PE=2 SV=1;sp|Q9FMY7|ZHD13_ARATH Zinc-finger homeodomain protein 13 OS=Arabidopsis thaliana GN=ZHD13 PE=1 SV=1	3.3	27.967	242	5669900	6894800	0.822344
A0A178VSE7;Q42449	Profilin-1	PRO1	1	tr|A0A178VSE7|A0A178VSE7_ARATH Profilin OS=Arabidopsis thaliana GN=AXX17_At2g15100 PE=3 SV=1;sp|Q42449|PROF1_ARATH Profilin-1 OS=Arabidopsis thaliana GN=PRO1 PE=1 SV=1	9.9	14.257	131	3919400	4783000	0.819444
A0A178WA88;P33207	3-oxoacyl-[acyl-carrier-protein] reductase, chloroplastic		1	tr|A0A178WA88|A0A178WA88_ARATH Uncharacterized protein OS=Arabidopsis thaliana GN=AXX17_At1g25630 PE=4 SV=1;sp|P33207|FABG_ARATH 3-oxoacyl-[acyl-carrier-protein] reductase, chloroplastic OS=Arabidopsis thaliana GN=At1g24360 PE=1 SV=2	2.8	33.534	319	6675900	8304100	0.803928
A0A178VV10;Q6AWU6	Probable thiol methyltransferase 2	HOL3	3	tr|A0A178VV10|A0A178VV10_ARATH HOL3 OS=Arabidopsis thaliana GN=AXX17_At2g41470 PE=4 SV=1;sp|Q6AWU6|HOL3_ARATH Probable thiol methyltransferase 2 OS=Arabidopsis thaliana GN=HOL3 PE=1 SV=1	14.2	25.042	226	22869000	28939000	0.790248
A0A178WHX3;O24456	Receptor for activated C kinase 1A	RACK1A	2	tr|A0A178WHX3|A0A178WHX3_ARATH RACK1A_AT OS=Arabidopsis thaliana GN=AXX17_At1g18980 PE=4 SV=1;sp|O24456|GBLPA_ARATH Receptor for activated C kinase 1A OS=Arabidopsis thaliana GN=RACK1A PE=1 SV=2	5.8	35.747	327	42339000	54232000	0.780701
Q93Z49;A8MS32		At5g64130	6	tr|Q93Z49|Q93Z49_ARATH AT5g64130/MHJ24_11 OS=Arabidopsis thaliana GN=At5g64130 PE=1 SV=1;tr|A8MS32|A8MS32_ARATH AT5G64130 protein OS=Arabidopsis thaliana GN=At5g64130 PE=1 SV=1	47	12.299	115	82088000	105230000	0.780082
A0A178V724;Q9SV09	Zinc finger CCCH domain-containing protein 46		1	tr|A0A178V724|A0A178V724_ARATH Uncharacterized protein OS=Arabidopsis thaliana GN=AXX17_At3g46340 PE=4 SV=1;sp|Q9SV09|C3H46_ARATH Zinc finger CCCH domain-containing protein 46 OS=Arabidopsis thaliana GN=At3g51950 PE=1 SV=1	2	59.843	540	1824700	2413300	0.756102
Q9C801	Protein MOS2	MOS2	3	sp|Q9C801|MOS2_ARATH Protein MOS2 OS=Arabidopsis thaliana GN=MOS2 PE=2 SV=1	5.2	51.027	462	23535000	31228000	0.753651
A0A178U9V3;F4K703;F4K704;Q940X9	La-related protein 1A	At5g21160;LARP1A	1	tr|A0A178U9V3|A0A178U9V3_ARATH LARP1a OS=Arabidopsis thaliana GN=AXX17_At5g21140 PE=4 SV=1;tr|F4K703|F4K703_ARATH LA RNA-binding protein OS=Arabidopsis thaliana GN=At5g21160 PE=1 SV=1;tr|F4K704|F4K704_ARATH LA RNA-binding protein OS=Arabidopsis thaliana GN	1.5	91.451	826	1605100	2143400	0.748857
Q8LC09;B9DGL7;Q0WW74;Q9LPU1		At1g21065;T22I11.11	6	tr|Q8LC09|Q8LC09_ARATH Putative uncharacterized protein OS=Arabidopsis thaliana PE=2 SV=1;tr|B9DGL7|B9DGL7_ARATH AT1G21065 protein (Fragment) OS=Arabidopsis thaliana GN=At1g21065 PE=2 SV=1;tr|Q0WW74|Q0WW74_ARATH Putative uncharacterized protein At1g21065 (	32	19.59	178	193050000	265980000	0.725806
Q9LVT8;A0A178UQN5		At5g47210	9	sp|Q9LVT8|RGGC_ARATH RGG repeats nuclear RNA binding protein C OS=Arabidopsis thaliana GN=RGGC PE=1 SV=1;tr|A0A178UQN5|A0A178UQN5_ARATH Uncharacterized protein OS=Arabidopsis thaliana GN=AXX17_At5g45700 PE=1 SV=1	26.6	37.999	357	128050000	176890000	0.723896
A0A178UGA7;Q0WPX9	Phosphatidylinositol 4-kinase beta 2	PI4KB2	1	tr|A0A178UGA7|A0A178UGA7_ARATH PI4KBETA2 OS=Arabidopsis thaliana GN=AXX17_At5g08880 PE=3 SV=1;sp|Q0WPX9|P4KB2_ARATH Phosphatidylinositol 4-kinase beta 2 OS=Arabidopsis thaliana GN=PI4KB2 PE=2 SV=1	0.8	126.24	1116	62521000	86559000	0.722293
A0A178V0D2;O49606	Actin-depolymerizing factor 9	ADF9	1	tr|A0A178V0D2|A0A178V0D2_ARATH ADF9 OS=Arabidopsis thaliana GN=AXX17_At4g39950 PE=3 SV=1;sp|O49606|ADF9_ARATH Actin-depolymerizing factor 9 OS=Arabidopsis thaliana GN=ADF9 PE=2 SV=2	8.5	16.37	141	2126100	2960300	0.718204
[truncated: 247 more rows]

## Sheet: Dimethyl (KR)
Dimethyl (KR) Probabilities	Amino acid	Number of Dimethyl (KR)	Leading proteins	Protein names	Gene names	Mol. weight [kDa]	Fasta headers	Score	Position in peptide	Intensity U50	Intensity U0	Ratio U50/U0
[truncated: 17 more rows]

[truncated: 3 more sheets: Methyl (KR), Arg-methylated proteins, Best candidates]
